# Supplementary material for: Study of 300,486 individuals identifies 148 independent genetic loci influencing general cognitive function
Source: Nat Commun. 2018 May 29;9:2098. doi: 10.1038/s41467-018-04362-x (PMC5974083; doi:10.1038/s41467-018-04362-x)
Supplement: Supplementary file 4 — Supplementary Data 1 [file 41467_2018_4362_MOESM4_ESM.xlsx]

## Sheet: Sheet1
Supplementary Data 1. Genome-wide significant (P < 5 x 10-8) SNP association results for the GWA meta-analysis of CHARGE-COGENT and UK Biobank general cognitive function. Lead SNPs highlighted in bold. GWA results are also shown for CHARGE, COGENT, UK Bioank and Reaction time.
CHR	BP	SNP	Allele1	Allele2	EAF	Z Score	P	Direction	HetPVal	I2	N	CHARGE Z Score	CHARGE P	CHARGE HetPVal	CHARGE I2	COGENT Z Score	COGENT P	COGENT HetPVal	COGENT I2	UKB Z Score	UKB P	UKB HetPVal	UKB I2	UKB HetPVal	UKB I2	RT Beta	RT SE	RT P
6	98591622	rs2388334	A	G	0.5245	-11.469	1.888e-30	???----?+++++?-+--+++---++?+-+--+++-?++++++++++---++++-+???+-???+--+++--+-++	0.721	0	277116	4.416	1.005e-05	0.6053	0	2.803	0.005068	0.7182	0	4.551	5.346e-06	0.2691	23.6641	0.2691	23.6641	-0.0017446	0.0017455	0.317578
6	98553894	rs1487441	A	G	0.4775	11.466	1.947e-30	-+-+++----++--+?+++-++-++----+----++---+---++--+-+++--+-----+-----+----+----	0.6985	0	300127	-4.911	9.05e-07	0.6714	0	-0.269	0.7878	0.6786	0	-5.379	7.488e-08	0.3968	0	0.3968	0	0.0020658	0.0017456	0.236641
6	98555272	rs9375188	T	C	0.4773	11.454	2.246e-30	++--++++++++-++-?+++-+-++--+++-+-++----+++++-++++-+-++++++-+-+--+--++++-++++	0.8534	0	300406	2.962	0.003061	0.6085	0	1.272	0.2035	0.7483	0	4.516	6.303e-06	0.9364	0	0.9364	0	0.0020318	0.0017457	0.244461
6	98574560	rs968050	T	C	0.4754	11.438	2.694e-30	???+-???++++-?+-?+-??---+-?+---+++--?-+-+----++++-?--?--???++????+++--+?++++	0.004848	36.4508	273057	2.299	0.02152	0.0572	33.4914	-1.494	0.1353	0.08151	29.3426	5.941	2.84e-09	0.8797	0	0.8797	0	0.0017249	0.0017461	0.323199
6	98577689	rs9372734	T	C	0.4752	11.431	2.94e-30	--+--+-+?++++++-?+-?+?+-+++++-+-++++++-+-+-----++-+-++++-+++++++-+--+++-++-+	0.1987	12.1798	291147	4.615	3.931e-06	0.4367	1.87445	0.93	0.3523	0.1742	19.9383	3.378	0.0007291	0.2393	28.7918	0.2393	28.7918	0.0017259	0.001746	0.322931
6	98549801	rs9401593	A	C	0.5223	-11.427	3.062e-30	-+-----++-+------+--+--+-----++-+-++--+-++----+-+++++-+----+-++--++---------	0.8151	0	300486	-4.124	3.729e-05	0.8783	0	-1.653	0.09841	0.5483	0	-3.423	0.0006183	0.2176	32.4476	0.2176	32.4476	-0.0020366	0.0017457	0.24336
6	98576223	rs12202969	A	G	0.4752	11.426	3.113e-30	+---?-----+-+--+?-+??++?--+--+++--+++----++++-+--+-+-?+-+++++-----++-+-?----	0.01386	29.3007	297876	-3.183	0.001459	0.2775	10.7083	1.494	0.1353	0.1141	26.6675	-7.534	4.912e-14	0.5728	0	0.5728	0	0.0017257	0.001746	0.322968
6	98582900	rs12206087	A	G	0.4752	11.407	3.85e-30	-+++?+++++-+-++-?+-??--?++-++---++---++++----+-++-+-+?-+----++++++--+-+?++++	0.01427	29.177	297876	3.159	0.001585	0.2852	10.2717	-1.499	0.1339	0.1195	26.1305	7.554	4.205e-14	0.5528	0	0.5528	0	0.00172	0.0017457	0.324482
6	98550289	rs1906252	A	C	0.4777	11.39	4.669e-30	+--------++-----+---++---++-----+---+-++-+---0++------+------------+-++---+-	0.9092	0	300486	-3.772	0.0001617	0.7782	0	-1.274	0.2028	0.9562	0	-5.764	8.194e-09	0.06832	57.8356	0.06832	57.8356	0.0020547	0.0017456	0.239172
6	98565211	rs1487445	T	C	0.4726	11.271	1.824e-29	-----++++--+------++-+++++---++-++-+---++---+--+-++-+---++++-+--+-----++----	0.0006886	37.7144	300486	-1.833	0.06673	0.03086	31.3717	-1.51	0.1312	0.01731	38.2551	-7.346	2.036e-13	0.3446	9.69296	0.3446	9.69296	0.0016276	0.0017461	0.351269
6	98562720	rs9375195	A	G	0.515	10.863	1.722e-27	---------++-++-+-+-++---++--------+-+++--+-+-++-+++----++-+++----+++-+------	0.07732	19.399	300486	-1.749	0.0803	0.5501	0	-0.293	0.7693	0.03721	33.5857	-5.865	4.496e-09	0.4729	0	0.4729	0	0.002313	0.00175	0.186252
6	98435125	rs10872224	T	G	0.6078	-10.815	2.927e-27	+-++--+---+-----++-+---+-+----+++----+--+-+++---+---+---+-+-+++-+++---++----	0.03899	23.4123	300486	-3.037	0.002393	0.2822	10.4404	-2.273	0.02305	0.02474	36.2069	-7.64	2.174e-14	0.9145	0	0.9145	0	-0.0021959	0.0017379	0.206391
6	98572976	rs13208578	T	C	0.5075	10.81	3.102e-27	???--???+++++?-+--+++-+-++?+-+--+++-?++++++++++---?+++-+???+-????--+++--+-++	0.6495	0	275414	4.581	4.629e-06	0.5127	0	2.978	0.002899	0.6992	0	4.707	2.515e-06	0.2831	21.1978	0.2831	21.1978	0.0016803	0.0017506	0.33714
6	98579481	rs12204181	T	C	0.4916	-10.797	3.539e-27	???++???------?-+?----++--?-+-++--++?-+--------+++?---+-???-+????++---++-++-	0.5689	0	272923	-4.953	7.291e-07	0.4781	0	-3.038	0.002383	0.6875	0	-4.522	6.136e-06	0.2672	23.9929	0.2672	23.9929	-0.0016882	0.0017493	0.334534
6	98578511	rs9401634	T	C	0.4924	-10.79	3.846e-27	-++++-++++++-++------+++++++++--++++++--++-++----+--------++-++++++-++++++++	0.04767	22.32	300486	5.693	1.251e-08	0.2517	12.2095	-0.874	0.3822	0.2502	13.7782	3.16	0.001575	0.3478	9.06335	0.3478	9.06335	-0.0017025	0.0017501	0.330644
6	98572120	rs10457441	T	C	0.4924	-10.786	4.001e-27	+-----+----+-+---+-++++----?-+------?-+----++--+-+--------++-----+++--------	0.2447	9.83647	294211	-5.31	1.094e-07	0.4739	0	-0.704	0.4816	0.3709	6.03564	-7.345	2.054e-13	0.07089	57.3379	0.07089	57.3379	-0.0016938	0.0017501	0.333135
6	98588754	rs9375225	T	G	0.5078	10.785	4.037e-27	???--???-+?+-?-++-+-++++--?-++++-+-+?+--+-+-++-+-+?++?+-???+-????--+---?----	0.009337	33.4487	272438	-1.592	0.1114	0.3265	9.70123	1.967	0.04919	0.1249	24.1061	-6.634	3.275e-11	0.662	0	0.662	0	0.0017064	0.0017496	0.329397
6	98411631	rs6905544	A	G	0.3929	10.778	4.365e-27	-++-?--+----++-+?-+-??-+----+-+-+---+-+--+--+-+-++-------+-+-+---+++-++--+--	0.4145	2.64103	300105	-3.045	0.002328	0.7107	0	-0.871	0.3839	0.1443	22.7111	-4.911	9.057e-07	0.3195	14.5299	0.3195	14.5299	0.0022961	0.0017376	0.186355
6	98576688	rs1872841	A	C	0.5075	10.77	4.772e-27	???++???-----?+-++---+-+--?-+-++---+?----------+++?---+-???-+????++---++-+--	0.6931	0	275414	-4.491	7.103e-06	0.538	0	-2.881	0.003961	0.7341	0	-4.623	3.785e-06	0.2767	22.32	0.2767	22.32	0.0016961	0.0017505	0.332591
6	98547979	rs9385269	T	C	0.5191	10.764	5.108e-27	+++--+++++--++---+------++++-+++-++-+++--+++-+--+++++--+--+++-+-----+-+-++-+	0.3589	4.85131	300486	4.498	6.87e-06	0.5342	0	0.359	0.7196	0.2543	13.5023	3.642	0.0002702	0.5137	0	0.5137	0	0.0025187	0.0017473	0.149451
6	98429337	rs9320823	T	C	0.3918	10.753	5.767e-27	+---++-+---+-+----+++-++------+-+-+-+--+++------++-++-+--+---+---++----+----	0.6851	0	300486	-4.002	6.288e-05	0.6343	0	-1.012	0.3118	0.4243	2.66377	-3.799	0.0001454	0.9308	0	0.9308	0	0.0021892	0.0017379	0.207783
6	98575726	rs9388171	C	G	0.4846	-10.73	7.369e-27	-+--+-+-+++---++?+-?+?+-++-++-++-++--++++++--+--+-++--++++-+--+---+--+-+++-+	0.1686	13.6815	300219	2.76	0.005786	0.08623	24.0828	1.566	0.1173	0.322	9.47495	4.553	5.276e-06	0.9335	0	0.9335	0	-0.0020613	0.0017473	0.238111
6	98452680	rs9401452	T	C	0.611	-10.692	1.113e-26	----+++-+-++----+---+-++-+--------+-+-+++++-------+---+-+++--+--+-+----+----	0.7617	0	300486	-3.44	0.0005828	0.7549	0	-1.892	0.05854	0.407	3.76287	-3.876	0.0001062	0.7711	0	0.7711	0	-0.0025394	0.0017372	0.143814
6	98421721	rs6938973	T	C	0.3935	10.69	1.131e-26	-+++--+-+++-+-+-++---+--++++++++-+-+-++---++++++--+--+-++-+++-+++--++++-++++	0.5771	0	300486	4.245	2.183e-05	0.4235	2.60531	0.96	0.3372	0.5186	0	3.904	9.472e-05	0.8982	0	0.8982	0	0.0022844	0.0017379	0.188704
6	98399521	rs4548017	A	G	0.394	10.674	1.346e-26	+-+-+--+-++-----+---++---++---------+--+-+++---++-------+----------+-+++--+-	0.9421	0	300486	-2.606	0.009156	0.9202	0	-1.291	0.1966	0.8701	0	-5.73	1.003e-08	0.2188	32.2493	0.2188	32.2493	0.0023139	0.0017373	0.182886
6	98458340	rs9401458	T	C	0.3892	10.673	1.36e-26	+-------?---+---++-+-+---+----++----+--++--+-++-+-+-+?----+--++-+--+-+-?--+-	0.04532	22.9782	289335	-3.939	8.197e-05	0.08196	24.7526	-1.851	0.06417	0.1016	25.9905	-3.522	0.0004283	0.4334	0	0.4334	0	0.0025258	0.0017372	0.145972
6	98399208	rs35121390	C	G	0.6074	-10.665	1.492e-26	??+-+--++++++?-+--+++-+-++?+-+--+++-?+-+++++-+----?+++-+???+--+-----++-++-++	0.5894	0	288805	4.025	5.693e-05	0.4345	2.01037	1.896	0.05791	0.565	0	4.591	4.419e-06	0.4171	0	0.4171	0	-0.0024132	0.0017375	0.164854
6	98507832	rs4839939	A	C	0.6105	-10.618	2.447e-26	+++----++-+-++---+---+-+++-+-+---++-+++-++---++---+-++++-++++-+++--+++++++++	0.0007595	37.4687	300486	4.349	1.366e-05	0.1423	19.3402	-1.132	0.2578	0.004161	44.8408	5.207	1.922e-07	0.08792	54.1635	0.08792	54.1635	-0.0024685	0.0017373	0.155342
6	98522436	rs13216075	C	G	0.6112	-10.61	2.666e-26	???++???--------++----++--?-+-++---+?-+--------+++?---+-???-+????+++--++-+--	0.6943	0	276693	-4.814	1.48e-06	0.5405	0	-2.815	0.004872	0.7623	0	-4.599	4.25e-06	0.2611	25.0562	0.2611	25.0562	-0.0024573	0.0017374	0.157264
6	98522698	rs35062457	T	C	0.611	-10.603	2.884e-26	---++-+-+-+++-++++--++--++++++-+-++-++-++++-+-+++-+-+---+++++++++--+++--++++	0.664	0	300486	4.347	1.377e-05	0.9483	0	-0.821	0.4115	0.5233	0	5.388	7.111e-08	0.117	49.0835	0.117	49.0835	-0.0024525	0.0017373	0.158034
6	98514302	rs55731746	A	G	0.3886	10.602	2.919e-26	++-+-+--+-+++---+----+-----+++-+-+----+--+---+-+-+--+-++--+-+-+--+-++--+----	0.1853	12.5731	300486	-2.46	0.01389	0.2624	11.5807	0.498	0.6184	0.6114	0	-6.393	1.625e-10	0.3369	11.2163	0.3369	11.2163	0.0024847	0.0017374	0.152686
6	98519911	rs4401671	T	G	0.611	-10.601	2.942e-26	+----++-+++--++-++--+-+++-++-----++-++-++--+-++++-++++-+-+-+---+-++-++-?++++	0.4074	2.89351	300310	3.558	0.0003738	0.2165	14.3341	1.055	0.2915	0.626	0	5.096	3.478e-07	0.4354	0	0.4354	0	-0.0024592	0.0017373	0.156921
6	98506764	rs13215227	T	C	0.6115	-10.598	3.047e-26	???-????-+--+--+?-+??++?--?--+++--++?-----+++----+?++?+--+++-????--+-+-?----	0.0128	32.108	278163	-2.317	0.02051	0.8544	0	1.493	0.1353	0.01891	41.3116	-7.993	1.322e-15	0.7949	0	0.7949	0	-0.0024794	0.0017375	0.153578
6	98507430	rs4839938	T	C	0.3885	10.597	3.063e-26	+++----++-+-++-------+-+++-+-+---++-+++-++---++---+-++++-++++-+++--+++++++++	0.0003633	39.2437	300486	4.375	1.216e-05	0.075	25.235	-1.258	0.2084	0.005783	43.5018	5.236	1.638e-07	0.0859	54.5248	0.0859	54.5248	0.0024703	0.0017375	0.155099
6	98529166	rs12176311	T	C	0.3885	10.596	3.103e-26	+---+----++-+--+?-+??++?--+---++--++------+++-+--+-++?+--+++-------+---?----	0.04828	23.0143	297982	-3.189	0.001429	0.3674	5.68929	1.365	0.1721	0.2364	16.0223	-7.49	6.901e-14	0.6455	0	0.6455	0	0.0024315	0.0017375	0.161689
6	98500712	rs9401501	T	C	0.6114	-10.596	3.113e-26	+----------+--++-+--+-+---++++-+-++-+-++++++-+--+-++-+++-+--+---+--++--+++++	0.2172	10.9993	300486	1.193	0.2328	0.4516	1.04399	1.486	0.1373	0.2636	12.8945	5.825	5.724e-09	0.5493	0	0.5493	0	-0.0024704	0.0017374	0.155064
6	98392667	rs9482120	A	C	0.6066	-10.595	3.128e-26	++---+----+++-+---+---+-+-----++---++-+-----+-++-+++---+----+--+-++---++--+-	0.3855	3.76843	300486	-2.932	0.003371	0.5515	0	0.141	0.8876	0.5265	0	-5.06	4.182e-07	0.07754	56.0697	0.07754	56.0697	-0.0022936	0.0017373	0.186763
6	98528404	rs4458695	A	G	0.3886	10.589	3.347e-26	+-+------++-----+---++---++-----+---+--+-+----++------+-------+----+--+---+-	0.9607	0	300486	-2.951	0.003163	0.8308	0	-1.322	0.1861	0.9654	0	-5.458	4.81e-08	0.2172	32.5084	0.2172	32.5084	0.0024269	0.0017375	0.16248
6	98539379	rs901629	T	C	0.3882	10.587	3.43e-26	++++?+-------+--?--???--------+-+---+++----+++++++-++-+-+-+++-+-+--+-----+--	0.8225	0	300010	-2.44	0.01467	0.9701	0	-0.213	0.8311	0.4125	3.50471	-5.366	8.072e-08	0.2617	24.9437	0.2617	24.9437	0.0023817	0.0017375	0.170459
6	98545611	rs62422661	T	G	0.3887	10.583	3.592e-26	----+++++--+-+----+---++-+----+-+--+--++++--+----+?+--+-+--+----+-+---+?----	0.4298	1.98711	299873	-2.579	0.009896	0.3963	4.13451	-0.115	0.9087	0.5723	0	-5.674	1.396e-08	0.6182	0	0.6182	0	0.0023239	0.0017377	0.181105
6	98539377	rs901628	C	G	0.6115	-10.58	3.703e-26	+++--++++-+++++++++-++---+-++-----+-++-++++++-----+-++++--++-+++----+-+-++++	0.2167	11.0225	300486	2.831	0.004646	0.0514	28.0692	0.294	0.7685	0.7461	0	5.028	4.955e-07	0.7149	0	0.7149	0	-0.0023802	0.0017375	0.170718
6	98526943	rs9398676	T	C	0.3889	10.577	3.802e-26	----------++++--+---------+-+--++-++++-++---+-+-+--------+++--+----+--++----	0.7884	0	300486	-2.765	0.005695	0.8498	0	-3.285	0.001018	0.628	0	-3.87	0.0001088	0.252	26.6324	0.252	26.6324	0.0024295	0.0017375	0.162024
6	98525726	rs9388083	T	C	0.3889	10.565	4.321e-26	++++---+-+--++++++++-+--+-+++++-++-+-+-----+++++++?+++-+-+-++-++-+-++++-++++	0.4464	1.30175	300049	3.039	0.002375	0.4231	2.63631	2.431	0.01507	0.3327	8.44727	3.993	6.516e-05	0.7038	0	0.7038	0	0.0024612	0.0017375	0.156617
6	98509656	rs4576255	T	G	0.6113	-10.562	4.486e-26	???-+???++++++??-?++++--++?+-+--+---?++++++-+++---?+++-+????-????---++--+-++	0.5494	0	271373	4.355	1.329e-05	0.533	0	2.817	0.004842	0.6564	0	3.833	0.0001268	0.1824	38.2589	0.1824	38.2589	-0.0024661	0.0017373	0.155747
6	98539519	rs901630	T	C	0.3886	10.545	5.372e-26	++-+-+++++-+--++-+++-+--++++-++--+-+-++-+-+--+-----+-+--++-+-++++++++++-++-+	0.09919	17.6964	300486	3.973	7.092e-05	0.3543	6.40867	-1.395	0.163	0.2467	14.0105	4.778	1.775e-06	0.3135	15.6593	0.3135	15.6593	0.0024242	0.0017375	0.16296
6	98528141	rs7766486	T	C	0.6149	-10.477	1.1e-25	--++?++++-++-++-?+-?----++-+++-+++---++-+--+---++--+++++-++-+--+-++-+++?++++	0.3658	4.66856	300029	2.348	0.01886	0.4222	2.6764	-0.431	0.6666	0.4963	0	5.756	8.625e-09	0.956	0	0.956	0	-0.0023103	0.0017374	0.183616
6	98528143	rs7742854	T	C	0.3854	10.47	1.192e-25	+-++++-----------+--+--+-----++-+-------+-++------+++++--+--+-+-++++--+-----	0.9532	0	300486	-2.934	0.003344	0.6831	0	-0.687	0.4921	0.9425	0	-4.867	1.13e-06	0.9963	0	0.9963	0	0.0023328	0.0017375	0.179382
6	98527087	rs9388090	T	C	0.384	10.432	1.774e-25	+-+++---+--+++-+-++-++--+++++--+-+++-+++++--+++++-++----++++++++---+++--++++	0.5481	0	300486	4.076	4.576e-05	0.8098	0	0.066	0.947	0.1909	17.8982	4.091	4.301e-05	0.7412	0	0.7412	0	0.0024335	0.0017375	0.161332
6	98513032	rs3004179	A	G	0.3983	10.235	1.379e-24	---+-++-+++-+-++---+--++++--+-++--+---+++---++--+++++--+---+---+-+----------	0.02733	25.1997	300486	-1.73	0.0836	0.3186	8.38716	-0.658	0.5107	0.06925	28.8543	-7.19	6.479e-13	0.4104	0	0.4104	0	0.0025251	0.0017378	0.146218
6	98546547	rs35099767	T	G	0.3738	10.05	9.176e-24	+-++++-+?--+-+-+?-+----+-------+----+---+-++++++-++++---+---+---+--+-+-+--+-	0.1019	17.7048	291334	-4.19	2.786e-05	0.5716	0	0.129	0.8974	0.03028	35.3717	-5.254	1.488e-07	0.4645	0	0.4645	0	0.0026029	0.001736	0.133777
6	98445008	rs4524616	A	C	0.5618	-9.979	1.882e-23	+--++-+-+-+-+-++++-+++--+++++--+-++-++-++++-+-+++-+-+---+++++++++--++++-++++	0.7324	0	300486	4.535	5.76e-06	0.9562	0	-0.79	0.4293	0.5779	0	5.008	5.511e-07	0.1402	45.1955	0.1402	45.1955	-0.0026281	0.0017407	0.131087
6	98439152	rs4368816	A	T	0.5619	-9.936	2.91e-23	++-+-+--+-+++---+----+-----+++-+-+----+--+--++-+-+--+-+---+-+-+--+-++--+----	0.1744	13.1371	300486	-2.569	0.01019	0.2325	13.358	0.444	0.6574	0.6075	0	-6.476	9.445e-11	0.371	4.36723	0.371	4.36723	-0.0027115	0.0017407	0.119297
6	98438566	rs9398648	A	T	0.4381	9.922	3.335e-23	--+??+???+++++?+??+???+?++??---++++--+++-+--++----+++++-+--??+--+--++--?+-++	0.1342	17.1511	275368	4.25	2.134e-05	0.04154	32.4324	1.632	0.1026	0.8271	0	3.438	0.0005857	0.1075	50.6984	0.1075	50.6984	0.0027057	0.0017407	0.120099
6	98437775	rs4240559	T	C	0.4379	9.915	3.579e-23	??-+-++------?+-++-----+--?-+-++---+?-+----++-++++?---+-???-++-+++++--+--+--	0.6147	0	288805	-4.081	4.483e-05	0.45	1.03119	-1.963	0.04961	0.6032	0	-4.375	1.215e-05	0.3994	0	0.3994	0	0.0027018	0.0017407	0.120631
6	98431600	rs4412208	T	C	0.5618	-9.907	3.875e-23	+++----+-++-----+-+-+++++++---+--------+--++-+-++--+--+-+--+-+----++-+-+--+-	0.1925	12.2078	300486	-1.848	0.06467	0.4925	0	-0.735	0.4622	0.2538	13.5372	-6.58	4.717e-11	0.411	0	0.411	0	-0.0026998	0.0017404	0.120843
6	98409668	rs7765605	T	C	0.439	9.903	4.033e-23	++-+?++-++++-++-?+-+??+-++++-+-+-+++-+-++-++-+-+--+++++++-+-+--++------++-++	0.2052	11.8538	300105	2.945	0.003232	0.481	0	0.866	0.3862	0.07874	29.2479	4.778	1.767e-06	0.3974	0	0.3974	0	0.0027682	0.0017397	0.111573
6	98433708	rs4460216	A	C	0.4383	9.901	4.106e-23	+--+--+++-+-----+-----++-+----+---+++------+--++++?----+-+-------+-+--+--++-	0.8116	0	300049	-3.743	0.0001819	0.7803	0	-0.282	0.7782	0.9175	0	-5.234	1.662e-07	0.03641	64.7887	0.03641	64.7887	0.0027047	0.0017405	0.120196
6	98410756	rs4412207	A	G	0.5612	-9.871	5.58e-23	+-----++-++-+++---++--+++++-+--+------+++---+---++?++---++-----+-+-+--+-----	0.288	7.85935	300049	-2.751	0.005942	0.631	0	-1.117	0.2638	0.1879	18.12	-5.709	1.14e-08	0.1283	47.1645	0.1283	47.1645	-0.0027763	0.0017397	0.110533
6	98415577	rs9387952	T	G	0.4391	9.863	6.047e-23	???+-???++++-?+-?+-??---+-?+---+++--?-+-+----++++-?--?--???++????+++--+?++++	0.004525	36.6998	273057	2.33	0.01982	0.05461	33.8833	-1.525	0.1271	0.08365	29.0941	5.967	2.423e-09	0.8781	0	0.8781	0	0.0027465	0.00174	0.114454
6	98419195	rs9387955	A	G	0.439	9.861	6.144e-23	+---+-++--+--++++-----+-++++-+++-+++-+++-++-+-+-+-?+-+-++----++-+---+-++++++	0.04128	23.2341	300049	3.288	0.001009	0.2105	14.862	0.466	0.641	0.02118	37.1227	4.563	5.04e-06	0.7125	0	0.7125	0	0.0027765	0.0017404	0.110657
6	98404346	rs7772622	T	C	0.4389	9.859	6.248e-23	++-+-+++++-+--++-+++-+--+-++-++--+-+-++-+-+--+----?+-+--++-+-++++++++++-++-+	0.1019	17.5992	300049	4.012	6.027e-05	0.3778	5.16256	-1.419	0.1558	0.249	13.8624	4.822	1.423e-06	0.3021	17.7406	0.3021	17.7406	0.0027594	0.0017403	0.112837
6	98423208	rs9387963	A	G	0.561	-9.854	6.594e-23	-+-++-+-+++---++?+-???+-++-++-++-++-+++++++--+-++-++--++++-++-++--+--+-+++++	0.4645	0.554653	300116	3.016	0.002562	0.1798	16.6944	1.486	0.1373	0.6334	0	4.381	1.181e-05	0.9717	0	0.9717	0	-0.0027619	0.0017404	0.112541
6	98403903	rs9375023	T	C	0.4396	9.812	9.986e-23	+-++++++++-+++-----+---++-++++-++++++-+-++---++-++++++--++++-++-++-+++--++++	0.9599	0	300486	2.837	0.004555	0.976	0	1.169	0.2424	0.632	0	4.656	3.227e-06	0.3656	5.48204	0.3656	5.48204	0.0027446	0.0017403	0.114789
6	98405337	rs6917247	C	G	0.4396	9.799	1.138e-22	+---++-+---+-+----+++-++--------+-+-+--+++------++-++-+--+---+---++----+----	0.5834	0	300486	-4.243	2.205e-05	0.429	2.30082	-0.962	0.3361	0.5218	0	-3.918	8.93e-05	0.895	0	0.895	0	0.002749	0.0017404	0.114206
6	98405151	rs6900820	A	T	0.5604	-9.798	1.149e-22	+---+-----++-+-++-+-+-++--+---+----+--++-+0++-+--++-+?--+-++-----++----?--+-	0.4584	0.812522	298407	-3.822	0.0001322	0.585	0	1.23	0.2187	0.6298	0	-5.07	3.973e-07	0.5035	0	0.5035	0	-0.0027442	0.0017404	0.114839
6	98404174	rs7772327	T	C	0.4397	9.798	1.152e-22	+++----++--+--++-+----+-++++-+--+++++++-++-++++++-++++-+-++++++++++-+++-+-++	0.394	3.42519	300486	4.67	3.014e-06	0.337	7.36667	0.987	0.3236	0.4652	0.029991	3.355	0.0007927	0.6634	0	0.6634	0	0.0027495	0.0017404	0.114138
6	98405214	rs6917037	C	G	0.4396	9.795	1.185e-22	-----+---+--++-+-+--+-++-+-----++--+--+--+----+-++?---+++-++++---+++-++-----	0.00399	32.9036	300049	-2.038	0.0415	0.02766	32.3163	0.445	0.6564	0.2859	11.4339	-6.223	4.872e-10	0.03408	65.382	0.03408	65.382	0.0027462	0.0017403	0.114572
6	98402438	rs7761851	T	C	0.4397	9.794	1.193e-22	-++-?+++++--++++?++???-+-+?++--+++-+--+++-++-+--+-?-+?-++-+-++-++-----+?++++	0.3727	4.50698	294928	3.469	0.0005224	0.3501	6.76677	-0.635	0.5257	0.5972	0	4.908	9.194e-07	0.5159	0	0.5159	0	0.002721	0.0017405	0.11797
6	98401847	rs6650999	T	C	0.4396	9.792	1.218e-22	+-+??+?+++?+?++??+????-?++-+-----+---+--+++?-+--+-++++++++-+?-+--+?-+++?++++	0.4315	2.02265	296405	3.001	0.002688	0.408	3.55248	-0.549	0.5829	0.5906	0	5.511	3.572e-08	0.8709	0	0.8709	0	0.0027464	0.0017405	0.114572
6	98402211	rs6569192	T	G	0.5604	-9.792	1.221e-22	--+-+++-+----+---+----++-+----+++--+--++++--++-+++-+--+-+--+----+-++--+?----	0.2922	7.67772	300310	-2.572	0.0101	0.2876	10.1326	-0.358	0.7203	0.4588	0.412088	-5.554	2.789e-08	0.4777	0	0.4777	0	-0.0027469	0.0017405	0.11452
6	98402394	rs7757790	A	C	0.4397	9.789	1.258e-22	-+++++++?+++-+++--+-+-++++++++--++++-++--++-+--+-+-+-?++++-++--+-++-+-+?++-+	0.04642	22.8436	289335	4.133	3.576e-05	0.09681	23.3099	1.94	0.05239	0.0913	27.0586	3.451	0.0005582	0.4714	0	0.4714	0	0.0027289	0.0017405	0.11691
6	98406850	rs9482139	T	C	0.4397	9.782	1.342e-22	+-++++++++-+++-----+---++-++++-+++++++-++----++-++++++--+++++++-++--++-+++++	0.9786	0	300486	2.987	0.002818	0.9695	0	1.09	0.2758	0.7618	0	4.535	5.76e-06	0.4649	0	0.4649	0	0.002696	0.0017404	0.121375
6	98406939	rs4313006	A	G	0.5605	-9.78	1.379e-22	+++----+-++-----+-+-+-+++++---+--------+---+-+-++--+--+-+--+-+----+--+-+--+-	0.247	9.62004	300486	-1.925	0.05425	0.4956	0	-0.67	0.5026	0.3387	8.06852	-6.568	5.103e-11	0.4321	0	0.4321	0	-0.0026713	0.0017406	0.124848
6	98401808	rs6651004	T	C	0.4397	9.779	1.381e-22	--++++-++-++++-++++-+-+-+++++0+++++----+++--+-++-+++0--++-+++++++---+++-++++	0.7747	0	300486	4.132	3.601e-05	0.7268	0	0.001	0.9995	0.699	0	4.449	8.637e-06	0.4903	0	0.4903	0	0.0027474	0.0017405	0.114441
6	98401483	rs6569189	A	C	0.4396	9.777	1.417e-22	---++------+--+-+-+++++++---+---+--+---++---+-++-----+0-++-----+++++-+-+--+-	0.3518	5.14494	300486	-4.456	8.358e-06	0.5603	0	-0.97	0.332	0.1882	18.1022	-3.816	0.0001357	0.4513	0	0.4513	0	0.0027411	0.0017405	0.115276
6	98463359	rs9388017	A	G	0.5893	-9.764	1.611e-22	+-+--+--+-+--++-------+-++---+-+-+--++-+-++++++++----+-++++--+-+--+--+-+++++	0.05833	21.1555	300486	0.353	0.7243	0.3828	4.84347	1.833	0.06682	0.1869	18.1959	6.369	1.906e-10	0.4376	0	0.4376	0	-0.0023132	0.0017378	0.183143
6	98399407	rs9320798	T	C	0.5594	-9.762	1.641e-22	-+-++-++-+-++--+++++++-+--+++-+---++--+-+--------++++-+----++-+-++-++-+-----	0.0529	21.7282	300486	-0.348	0.728	0.386	4.66657	-1.804	0.07118	0.173	19.2311	-6.402	1.536e-10	0.4149	0	0.4149	0	-0.0027965	0.0017414	0.108283
6	98399604	rs4644071	T	C	0.4404	9.751	1.828e-22	-++-----++--+--+-+-++--++--++-+---+++------+--+----++-+---+-+-+--+--+++-----	0.2397	9.94885	300486	-1.341	0.1798	0.5002	0	-2.837	0.004558	0.2771	12.0054	-6.115	9.673e-10	0.7808	0	0.7808	0	0.0028827	0.0017414	0.0978588
6	98475160	rs7772104	A	G	0.5668	-9.747	1.901e-22	???+????++++--+-?+-??---++?+---+++--?-+-+----+-++-??-?--???++????++-+-+?++++	0.05333	25.1174	272676	2.657	0.007884	0.3056	11.1969	-1.913	0.05581	0.2765	13.097	5.972	2.343e-09	0.8729	0	0.8729	0	-0.0028959	0.0017393	0.0959401
6	98400486	rs6569187	T	C	0.4399	9.746	1.927e-22	++----+--+----+----+-+-+-----------++++---++-+--+---+++--+-------+++---+----	0.792	0	300486	-4.148	3.356e-05	0.7625	0	0.072	0.9423	0.6968	0	-4.469	7.86e-06	0.5075	0	0.5075	0	0.0028	0.0017405	0.107666
6	98397820	rs9490147	T	C	0.5603	-9.734	2.165e-22	???+-???++++-?+-?+-??---+-?+---+++--?-+-+----++++-?--?--???++????+++--+?++++	0.004784	36.4988	273057	2.285	0.0223	0.0608	32.9661	-1.463	0.1436	0.07254	30.4358	5.947	2.726e-09	0.8963	0	0.8963	0	-0.0027543	0.0017404	0.113525
6	98494218	rs13194250	T	C	0.4329	9.733	2.17e-22	+++---++++-+-+-?---+--+-+++++-++++--+++-+++--+--+---++-++-++-+++++-++++-++++	0.4009	3.15911	300127	4.96	7.052e-07	0.5168	0	0.82	0.4123	0.3233	9.04405	5.203	1.962e-07	0.3427	10.0719	0.3427	10.0719	0.0029944	0.0017396	0.0851922
6	98398945	rs11154010	A	G	0.4402	9.733	2.176e-22	+-+---++?+--+++---+-+-+-++-+++--++---+++-----+--+-++-+++-+-+-++++---+-++++++	0.1056	17.3388	291414	4.192	2.76e-05	0.7328	0	-1.339	0.1804	0.1581	20.3885	7.391	1.456e-13	0.3781	2.88119	0.3781	2.88119	0.0027895	0.0017403	0.108968
6	98399612	rs4464802	A	T	0.5595	-9.731	2.216e-22	+--+++++--+--++-+-+--++--++--+-+++---++++++-++--+++--+-+++-+-+-++-++---+++++	0.2206	10.8395	300486	1.363	0.173	0.482	0	2.828	0.004679	0.2579	13.2672	6.133	8.63e-10	0.7825	0	0.7825	0	-0.0028646	0.0017414	0.099977
6	98491210	rs9388046	A	G	0.4335	9.731	2.227e-22	---++-+-----+++-------++--+-+--+--+--+--+-----+---+-++++-+--+--+--++-++-----	0.7611	0	300486	-2.686	0.007226	0.6251	0	-1.659	0.09713	0.5437	0	-4.576	4.729e-06	0.9472	0	0.9472	0	0.0029747	0.0017394	0.0872369
6	98398832	rs11154009	T	C	0.5593	-9.728	2.297e-22	+--+++--++--+++-+++-++-++-+++--++++++++-++-+-+---+++-+--+++--+------+++-++-+	0.08395	18.854	300486	5.542	2.989e-08	0.03279	31.0047	-0.095	0.9244	0.675	0	5.84	5.224e-09	0.5654	0	0.5654	0	-0.0027849	0.0017412	0.109721
6	98396351	rs7753937	A	G	0.4397	9.727	2.302e-22	???+????++++--+-?+-??---++?+---+++--?-+-+----+--+-??-?--???++????++-+-+?++++	0.04931	25.624	272676	2.673	0.007507	0.2901	12.3141	-1.928	0.05389	0.2745	13.2384	5.974	2.319e-09	0.8735	0	0.8735	0	0.0027489	0.0017403	0.114214
6	98481755	rs7760876	T	C	0.4333	9.723	2.398e-22	++--+------+----+--+++++++---++-+-++---++-++-++++-?--+++-----+---++---------	0.7005	0	300049	-3.891	9.998e-05	0.7536	0	0.173	0.8626	0.5478	0	-4.436	9.161e-06	0.4888	0	0.4888	0	0.0029101	0.0017393	0.0942975
6	98396176	rs9490143	A	G	0.5602	-9.723	2.404e-22	+-+-+-+----++--+--+--+-+-++--++---+++-+----++++--+--+?--+++++---+------?----	0.0804	19.3584	298407	-2.375	0.01756	0.07142	25.6243	0.608	0.5433	0.4699	0	-5.648	1.619e-08	0.7887	0	0.7887	0	-0.0027552	0.0017405	0.113423
6	98487056	rs9375104	C	G	0.4334	9.718	2.527e-22	+-+-+-----+-++-++-----++-+-+++-++-+-+-++---++---++-++--+--+-+------+---+--+-	0.2628	8.91094	300486	-4.15	3.326e-05	0.8283	0	0.974	0.3298	0.1348	22.2939	-4.447	8.706e-06	0.1983	35.6499	0.1983	35.6499	0.0030085	0.0017394	0.0836951
6	98465097	rs9385222	A	G	0.4107	9.714	2.618e-22	???-+???----+?--?-+?++++++?-++++---+?+-+-+-++-+-++??+?++???--????---++-?----	0.0273	28.8705	271606	-2.337	0.01943	0.04397	36.1782	1.001	0.3168	0.293	11.5767	-5.765	8.179e-09	0.7294	0	0.7294	0	0.0022338	0.0017378	0.198632
6	98358220	rs11153969	T	C	0.3687	9.714	2.638e-22	+++++-+++-+++++-+-++-+--+-++++-+-+---+-++-+-++-+--++++++-+---++-++--+-++++++	0.06201	20.7883	300486	4.078	4.545e-05	0.3552	6.36047	-0.034	0.9727	0.2627	12.9501	6.995	2.655e-12	0.01482	71.4041	0.01482	71.4041	0.0021215	0.0017387	0.222408
6	98488641	rs12663336	A	C	0.4334	9.711	2.694e-22	???--???++++++?+--++++--++?+-+--+++-?+-++++++++---?+++-+???+-????---++--+-++	0.6619	0	274440	4.904	9.405e-07	0.5	0	2.817	0.004843	0.7675	0	4.6	4.23e-06	0.25	26.9718	0.25	26.9718	0.003011	0.0017394	0.0834449
6	98489561	rs9398662	T	C	0.5665	-9.702	2.948e-22	-+-+-++-++------++---+----+---+-+-+--------+--+----++++-+----++---++-----+--	0.1945	12.107	300486	-2.246	0.02468	0.09992	22.7948	-0.532	0.5947	0.6001	0	-5.36	8.322e-08	0.5119	0	0.5119	0	-0.003003	0.0017394	0.0842752
6	98464373	rs9375075	A	T	0.4115	9.697	3.109e-22	-+++++++?+++-+++--+-+-+++-++++--++++-++--++-+--+-+-+-?++++-++--+-++-+-+?++-+	0.04474	23.0498	289335	3.942	8.067e-05	0.08221	24.7279	1.885	0.05944	0.1005	26.1038	3.523	0.0004259	0.4296	0	0.4296	0	0.0022611	0.0017383	0.193348
6	98369230	rs4339469	T	G	0.3686	9.692	3.248e-22	+++-+-----++++---+--++-----+--+-+------+---+--+++-------------+----+-++--+--	0.4853	0	300486	-5.182	2.198e-07	0.4835	0	-2.378	0.01741	0.5832	0	-3.298	0.0009729	0.3905	0.23279	0.3905	0.23279	0.0020982	0.0017385	0.227463
6	98365289	rs4839715	A	G	0.3648	9.687	3.426e-22	---++++-+--+++++-+-+-+-----+++-++++++++-++0-+-+--++-++-++++-+-++++-++-+-++-+	0.2563	9.20317	300486	1.726	0.08426	0.6229	0	0.786	0.4319	0.2625	12.9627	6.551	5.716e-11	0.4057	0	0.4057	0	0.002129	0.0017385	0.220714
6	98364895	rs9482094	A	G	0.369	9.683	3.556e-22	---+-+-+-+---+---++--+--------+-+-+++-+-+++++++-++-+-----++++-----++--------	0.03616	23.806	300486	-2.771	0.005596	0.2893	10.0376	0.66	0.5092	0.08652	26.8703	-5.392	6.956e-08	0.1162	49.2214	0.1162	49.2214	0.0019617	0.0017389	0.259269
6	98344031	rs9372625	A	G	0.3756	9.671	3.994e-22	-+-+-+++++-+--+--+++++--+-+---+--+-+-+--+++--+++--?--++-++-+-++++++-+++-++-+	0.2833	8.06197	300049	4.129	3.636e-05	0.8594	0	-0.995	0.3198	0.1366	22.1366	4.473	7.695e-06	0.1991	35.5116	0.1991	35.5116	0.0021616	0.0017384	0.213703
6	98416581	rs6935884	A	C	0.4474	9.665	4.234e-22	+-+-----++-+--++++-+-----++-++++-++-++-+-+---+---++--++--+--+++-++++-+++++++	0.1291	15.7048	300486	1.187	0.2352	0.3047	9.16729	0.716	0.4741	0.2866	11.3894	6.438	1.213e-10	0.9059	0	0.9059	0	0.0028726	0.0017397	0.0986961
6	98415905	rs9375031	T	C	0.5525	-9.657	4.602e-22	+-++++-++-+--+--+++++++---+---+-+--+-----+--+--+-+------++++--+--+-----+----	0.4039	3.02435	300486	-1.983	0.04738	0.8306	0	-1.584	0.1131	0.06412	29.4997	-5.174	2.289e-07	0.9145	0	0.9145	0	-0.002892	0.0017397	0.0964495
6	98418637	rs9490266	T	C	0.4472	9.652	4.823e-22	-++--+-+?++++++-?+-?+?+-+++++-+-++++++-+-+-----++-++++++-++++--+-+--++--++-+	0.2014	12.0438	291147	4.464	8.051e-06	0.4159	3.03814	0.897	0.3695	0.1703	20.2481	3.471	0.000519	0.2634	24.6799	0.2634	24.6799	0.0028906	0.0017402	0.0966941
6	98395421	rs9372650	A	C	0.5607	-9.642	5.304e-22	----------++++--+---------+-+--++-++++-++---+-+-+--------+++--+----+--++----	0.7745	0	300486	-2.755	0.005877	0.8461	0	-3.301	0.0009643	0.6076	0	-3.889	0.0001008	0.2554	26.0537	0.2554	26.0537	-0.0027416	0.0017405	0.115215
6	98373765	rs6937215	T	C	0.3724	9.627	6.145e-22	--+++-+--+---+++--+++++++++--+-+-+++++-++--+--++--++-+++++-+---+-++--++-++++	0.2764	8.3152	300486	1.948	0.05144	0.1659	17.6463	0.237	0.8123	0.7192	0	6.018	1.769e-09	0.8285	0	0.8285	0	0.0021215	0.0017391	0.222515
3	49772708	rs7618519	A	T	0.4925	-9.587	9.107e-22	-+--+++------+-++--+++++--+---+---++-+--+--++------++++--+++---+-+-+--------	0.9115	0	300486	-3.389	0.0007004	0.6714	0	-0.301	0.7638	0.9288	0	-4.696	2.647e-06	0.5747	0	0.5747	0	-0.0053937	0.0017448	0.00199297
3	49772647	rs7618501	A	G	0.4925	-9.584	9.314e-22	???-+???--?-+?-+--+--+++++?++++++-++?-----+++-++-+?-+?+-???+-????---+-+?----	0.3271	6.9909	272438	-1.863	0.06245	0.7443	0	0.428	0.6688	0.259	13.7353	-6.015	1.8e-09	0.7169	0	0.7169	0	-0.0053924	0.0017448	0.00199756
3	49772375	rs7649348	A	G	0.5075	9.578	9.876e-22	-+----+--+-+++++---++--+++-+++--+++-++-++-++-++-+-++++++--+-++-++-+++++-++++	0.2437	9.76792	300486	1.998	0.04566	0.7514	0	1.387	0.1655	0.0338	34.2322	5.364	8.136e-08	0.8876	0	0.8876	0	0.0053951	0.0017448	0.00198747
6	98403022	rs4363043	T	C	0.5519	-9.56	1.177e-21	-+-++++++--+++++-+++--+++--+++++-+++-++-+-++++--++++++-+++++++-++++-+--+++-+	0.9589	0	300486	2.995	0.002743	0.8427	0	1.27	0.2042	0.9671	0	5.469	4.535e-08	0.1623	41.5546	0.1623	41.5546	-0.0028533	0.0017401	0.101069
3	49734229	rs9873183	A	G	0.5061	9.559	1.188e-21	++++--++-+++-++---+--++-++-+++++++-+-++-+++--++++++--+-0--++--+++---+-+-++++	0.1539	14.2504	300486	2.879	0.003984	0.1172	21.3079	2.055	0.03989	0.293	10.9792	4.208	2.577e-05	0.4634	0	0.4634	0	0.0056683	0.0017456	0.001166
3	49773236	rs35261599	A	G	0.507	9.556	1.226e-21	--+-+--+-++----+++--++-+---?--+---+-+-+-+---+---+---+-+---++--++++-++-------	0.05773	21.3343	296137	-1.646	0.09983	0.4048	3.65851	-2.185	0.02886	0.07376	28.3103	-6.317	2.663e-10	0.1773	39.0987	0.1773	39.0987	0.0054011	0.0017451	0.00196834
3	49761613	rs3811695	T	C	0.5071	9.548	1.327e-21	???+????+-++-?+-?+-??---++?+----+++-?++-+----+++--?--?-+???++????++---+?++++	0.0002799	45.0317	272951	1.768	0.0771	0.09988	28.1542	-2.044	0.04091	0.03692	36.3952	7.549	4.381e-14	0.9816	0	0.9816	0	0.0056181	0.0017454	0.00128736
3	49762662	rs7634902	T	G	0.5079	9.545	1.363e-21	--++-+------+--+-+--+---------+--+-+----+-++------+++++-----+-+-++++--+-----	0.6974	0	300486	-2.503	0.01233	0.374	5.3232	-0.868	0.3853	0.7982	0	-5.172	2.316e-07	0.9598	0	0.9598	0	0.0056215	0.0017447	0.00127292
3	49745677	rs4855841	A	G	0.5064	9.539	1.436e-21	-+-??-+--------+?+-???---++---+-++-?+---++----+-+-+-+-+-+-+??+---+++--+-----	0.7962	0	298180	-2.964	0.003033	0.8695	0	-1.444	0.1487	0.2799	13.0566	-5.283	1.269e-07	0.9436	0	0.9436	0	0.0056577	0.0017457	0.00119152
3	49763338	rs1049256	T	C	0.492	-9.535	1.496e-21	-+++++-++++-+-+++-+----++++?+-++++++?+-++-+--++-+-++++++++--+++++---++++++++	0.2722	8.59576	294211	5.132	2.873e-07	0.4879	0	0.649	0.5163	0.3995	4.22985	7.368	1.729e-13	0.08495	54.7033	0.08495	54.7033	-0.0056216	0.0017447	0.00127292
3	49744392	rs3749241	A	G	0.4926	-9.533	1.523e-21	-----+----+-+--+-+-+-++-----+++----+--+--+-++--+++?+++---+--++--++---++--+--	0.008724	30.1775	300049	-3.946	7.934e-05	0.1626	18.0569	-0.348	0.7282	0.008079	42.0424	-5.173	2.306e-07	0.2465	27.5887	0.2465	27.5887	-0.0056584	0.0017448	0.0011825
3	49748833	rs4855862	T	C	0.507	9.531	1.551e-21	++---+---+-----+---+--++------+----+--++-+-+-+--++++--++--------++-+---+----	0.5011	0	300486	-4.603	4.161e-06	0.2893	10.0355	0.088	0.9302	0.8437	0	-4.58	4.644e-06	0.3726	4.03071	0.3726	4.03071	0.0056374	0.001745	0.00123566
3	49761605	rs3811696	T	C	0.5075	9.529	1.586e-21	+----+--+++--++--+--+-+++-++-----++-+++++0-+-++++-++++---+-----+-++-++-?++++	0.5405	0	300310	3.881	0.000104	0.3532	6.46994	1.073	0.2832	0.5951	0	4.902	9.472e-07	0.543	0	0.543	0	0.0056251	0.001745	0.00126648
3	49745822	rs4855867	T	C	0.5069	9.526	1.637e-21	+++---+++--++++++--++----+-++---+-+-++--++++++--+-+-+++++++++++-+---+++-++++	0.6297	0	300486	2.75	0.005961	0.5028	0	-0.314	0.7532	0.8325	0	6.146	7.969e-10	0.8405	0	0.8405	0	0.0055985	0.0017451	0.00133629
3	49744890	rs11716575	A	G	0.493	-9.524	1.665e-21	+++++++++-----+-+-++-+-++-++++++++-+-+-++-++++-+-++++++--+---++++---+-++++++	0.005139	31.9024	300486	2.683	0.007297	0.6549	0	0.632	0.5277	0.001051	49.5985	7.457	8.863e-14	0.1286	47.1272	0.1286	47.1272	-0.0056374	0.0017451	0.00123595
3	49750188	rs3749240	A	T	0.5078	9.522	1.704e-21	---+++----++++++-+-+----+--+++-+++-+-++-++--+-+--++--+---++++-+++++-+-+-++++	0.4984	0	300486	2.006	0.04485	0.7	0	0.871	0.3839	0.4881	0	6.515	7.283e-11	0.4417	0	0.4417	0	0.0056452	0.0017448	0.00121423
3	49745188	rs11709680	T	C	0.507	9.522	1.706e-21	+++--+-+--+--+----++--++------+----+-----+-+----++-+-+++--------+++----+----	0.7547	0	300486	-5.963	2.472e-09	0.82	0	0.078	0.9381	0.8024	0	-5.144	2.688e-07	0.31	16.2946	0.31	16.2946	0.0056378	0.0017451	0.00123509
3	49752372	rs11130218	T	C	0.5067	9.516	1.793e-21	+++++-+++-+++++-+-++-+--+-++++-+-+--++-++-+-++-+--++++-+-++--+++++--+-++++++	0.08179	19.0283	300486	4.306	1.66e-05	0.4325	2.10235	-0.075	0.94	0.2724	12.314	6.926	4.32e-12	0.01348	71.9548	0.01348	71.9548	0.0056366	0.0017458	0.00124366
3	49798520	rs12490656	A	G	0.4891	-9.513	1.854e-21	???++???------?-++----++--?-+-++---+?-+--------+++?---+-???-+????+++--++-+--	0.6683	0	274440	-4.903	9.457e-07	0.5026	0	-2.816	0.004865	0.7672	0	-4.609	4.049e-06	0.2625	24.812	0.2625	24.812	-0.0056151	0.0017446	0.00128884
3	49736565	rs6785549	A	G	0.5072	9.511	1.896e-21	-+-+++---+++----+-+-+-+--+++---+-------+---++--+++----+---+--++-+-++-++---+-	0.3134	6.73498	300486	-2.053	0.04012	0.531	0	-0.054	0.9571	0.4156	3.21644	-6.045	1.491e-09	0.3642	5.77889	0.3642	5.77889	0.005661	0.0017452	0.00117923
3	49890613	rs2352974	T	C	0.483	-9.509	1.921e-21	++-----+-+++----+-+-+-++-++---+-----+--+-+-+-+-++--+--+-----------++-+-+--+-	0.4679	0.426176	300486	-3.297	0.0009757	0.8321	0	-0.17	0.865	0.3508	7.30441	-6.428	1.291e-10	0.1186	48.8055	0.1186	48.8055	-0.0058185	0.0017438	0.000848008
3	49739086	rs1491986	T	C	0.5073	9.509	1.93e-21	+-+-+-++-+--+++-+---+-+-++-++++-++---+++-----0--+-?--++++--+-+-++---+-++++-+	0.08747	18.6795	300049	3.411	0.0006475	0.5257	0	-0.907	0.3645	0.2369	14.6733	7.032	2.037e-12	0.1359	45.9167	0.1359	45.9167	0.005651	0.0017452	0.00120365
3	49842625	rs2234391	A	G	0.5087	9.509	1.931e-21	???----?+++++?-+--+++---++?+-+--+++-?++++++-+++---?+++-+???+-????--+++--+--+	0.6428	0	275952	4.43	9.437e-06	0.4794	0	2.767	0.005658	0.7161	0	4.614	3.956e-06	0.2517	26.6862	0.2517	26.6862	0.0057781	0.0017444	0.000925337
3	49753003	rs34614773	T	G	0.4927	-9.5	2.096e-21	??+-+--++++++?-+--+++++-++?+-+-++++-?+-+++++-+----?+++-+???+--+-----++-++-++	0.5902	0	288805	4.031	5.557e-05	0.4301	2.29142	1.94	0.05239	0.5718	0	4.609	4.048e-06	0.414	0	0.414	0	-0.0056286	0.0017452	0.00125893
3	49761571	rs4855850	A	G	0.5081	9.496	2.181e-21	-++-----++-----+-+-++--+---++-+---+++------+--+----++-+---+-+-+--+--+-+-----	0.1716	13.2818	300486	-1.32	0.1868	0.3588	6.16056	-2.835	0.004586	0.2741	12.2011	-6.056	1.4e-09	0.8031	0	0.8031	0	0.0056297	0.0017451	0.00125574
3	49799729	rs9865480	T	C	0.5063	9.494	2.214e-21	???+-???++++-?+-?+-??---+-?+---+++--?-+-+----++++-?--?--???++????+++--+?++++	0.004691	36.5702	273057	2.27	0.02319	0.05761	33.4298	-1.498	0.134	0.07959	29.5715	5.941	2.838e-09	0.8787	0	0.8787	0	0.0056554	0.0017458	0.00119784
3	49752427	rs11130219	T	C	0.5073	9.494	2.226e-21	+--+--+-+-+-----++-++--+-+----+++----+--+--++---+---+---+-+-+++-+++---++----	0.1018	17.5126	300486	-3.051	0.002283	0.3525	6.50711	-1.747	0.08065	0.0591	30.1643	-7.214	5.426e-13	0.9323	0	0.9323	0	0.0055975	0.0017451	0.00133875
3	49799475	rs9882639	A	C	0.507	9.488	2.361e-21	----++----+-------+++-+---+--++---+---+--+--++-++++---+----+-+--++-+++---+--	0.733	0	300486	-4.326	1.52e-05	0.7141	0	0.924	0.3556	0.9005	0	-4.218	2.466e-05	0.2233	31.5068	0.2233	31.5068	0.005646	0.0017458	0.00122067
3	49800272	rs60205400	T	C	0.493	-9.487	2.387e-21	??+-+--++++++?-+--+++-+-++?+-+--+++-?+-++++--+----?+++-+???+-++-?--+++-++-++	0.5847	0	288078	3.992	6.542e-05	0.51	0	1.946	0.05171	0.4701	0	4.094	4.245e-05	0.5107	0	0.5107	0	-0.0056569	0.0017458	0.00119426
3	49807085	rs9859153	T	G	0.493	-9.485	2.432e-21	--+----+++++++-----++-++-+++++++---+-+++++-+-+------+--++++++-+-+-------++++	0.03885	23.4311	300486	1.396	0.1627	0.06365	26.5138	1.036	0.3001	0.2218	15.7043	5.791	6.996e-09	0.7421	0	0.7421	0	-0.0056614	0.0017458	0.00118359
3	49798920	rs7634886	A	G	0.5089	9.484	2.437e-21	???--???-?-??++?-?++--++--???-+??-?+??+-?--+-+---+??-+++???--????++---?+----	0.7713	0	244476	-3.057	0.002232	0.953	0	-0.016	0.9876	0.683	0	-5.084	3.689e-07	0.2302	30.3459	0.2302	30.3459	0.0056504	0.0017452	0.00120504
3	49813013	rs34451146	T	C	0.492	-9.482	2.5e-21	++-+++----++---+-++++---------+---+++--+---------+?++++--+---+-+++++--++----	0.7675	0	300049	-5.206	1.93e-07	0.3512	6.63826	-0.627	0.5308	0.9575	0	-4.19	2.785e-05	0.7652	0	0.7652	0	-0.0056513	0.0017447	0.0011995
3	49819102	rs11130221	C	G	0.508	9.481	2.528e-21	+---+--+++---+-+-++++-+-+-+-+--+++--++-++++--++++-++++++-+----++---++++-++-+	0.03201	24.4249	300486	4.495	6.942e-06	0.06174	26.7413	1.793	0.07289	0.3249	8.94467	6.044	1.506e-09	0.009786	73.6657	0.009786	73.6657	0.0056403	0.0017447	0.00122574
3	49810961	rs6766836	A	G	0.5085	9.476	2.636e-21	+++????-+++-?+--?-????-?+???-+++++----?+++-+-+----?+++?+-+-??++---?+++-?+-++	0.006903	34.8833	288498	1.4	0.1615	0.1325	22.2083	1.824	0.06808	0.105	30.1676	5.81	6.262e-09	0.009213	73.9629	0.009213	73.9629	0.0056635	0.0017458	0.00117869
3	49809063	rs6446295	T	G	0.492	-9.476	2.642e-21	-+++-+++?+++-+++--+++-++++++++---+++-+-+-++----+---++?++++--+--++++-+--?++-+	0.005697	32.0389	289335	4.477	7.573e-06	0.0134	36.1619	1.781	0.07497	0.07843	28.493	3.541	0.0003984	0.2981	18.5004	0.2981	18.5004	-0.0056506	0.0017446	0.00120033
3	49825370	rs9871654	T	C	0.5086	9.474	2.689e-21	-+++-+++++-+--+--+++-+--+-++--+-++-+-+--+++--+++--?--++-++-+-++++++-+++-++-+	0.2061	11.6017	300049	4.133	3.579e-05	0.8001	0	-1.144	0.2528	0.126	23.0552	4.461	8.177e-06	0.1829	38.1826	0.1829	38.1826	0.0056212	0.0017446	0.00127321
3	49813169	rs57648519	A	C	0.4925	-9.468	2.843e-21	???+-???++++-++-?+-??---++?+---+++--?-+-+----++++-?+-?--???-+????+++--+?++++	0.004769	36.2681	274336	2.905	0.003676	0.04941	34.1871	-1.779	0.07516	0.1534	22.2685	6.311	2.769e-10	0.8298	0	0.8298	0	-0.0056555	0.0017451	0.00119234
3	49878078	rs2271960	T	C	0.5102	9.465	2.927e-21	???----?+++++?-+--+++-+-++?+-+--+++-?++++++++++---?+++-+???+-????--+++--+-++	0.6798	0	275952	4.374	1.221e-05	0.5263	0	2.827	0.004692	0.7155	0	4.616	3.909e-06	0.279	21.936	0.279	21.936	0.0056489	0.0017442	0.00120088
3	49808374	rs7431106	A	G	0.4925	-9.465	2.936e-21	++-+--+--+++-++++--+--+--------+-++-+-------+----+--------+++----+-+-+-+----	0.7439	0	300486	-1.927	0.05401	0.8762	0	-1.985	0.04718	0.3341	8.36057	-5.252	1.506e-07	0.8763	0	0.8763	0	-0.0056547	0.0017451	0.00119426
3	49832261	rs6802890	A	G	0.5085	9.463	2.983e-21	-+++-+++?+++-+++--+-+-++++?+++---+++-+-+-++----+---++?++++--+--++++-+--?++-+	0.005105	32.5864	286769	4.376	1.209e-05	0.01071	37.5575	2.037	0.04161	0.07693	28.6697	3.461	0.0005379	0.3849	1.44547	0.3849	1.44547	0.0057847	0.0017447	0.000914956
3	49821625	rs13063621	T	C	0.5079	9.463	2.992e-21	???--???++++++++--++++--++?+-+--+++-?+-++++++++---?+++-+???+-????---++--+-++	0.6824	0	276693	4.834	1.34e-06	0.5276	0	2.843	0.004469	0.7594	0	4.602	4.176e-06	0.2617	24.9625	0.2617	24.9625	0.0056407	0.0017447	0.00122433
3	49780844	rs9876508	A	G	0.508	9.461	3.043e-21	???+-???++++-?+-?+-??---+-?+---+++--?-+-+----++++-?--?--???++????+++--+?++++	0.004865	36.4379	273057	2.268	0.02335	0.06185	32.8153	-1.534	0.1249	0.0817	29.3206	5.955	2.595e-09	0.8807	0	0.8807	0	0.0056188	0.0017448	0.00128027
3	49878113	rs2271961	T	C	0.509	9.449	3.43e-21	++-++-+++---+-+-+-+-+--++-++---+-++-++-++-+--++---+-+-++++-+--++---+++-++-++	0.07209	19.8512	300486	3.829	0.0001288	0.7717	0	0.219	0.8268	0.02024	37.3839	6.026	1.685e-09	0.03678	64.6934	0.03678	64.6934	0.0056943	0.0017447	0.00109977
3	49783103	rs9815766	T	C	0.5075	9.448	3.442e-21	-+++-++--+--++--++--++++-++-+-+++-+---+-+-+-----+--+----++----+++-+--+-+----	0.5541	0	300486	-2.254	0.02419	0.8125	0	-1.621	0.105	0.1556	20.5824	-4.89	1.01e-06	0.7364	0	0.7364	0	0.0056234	0.0017452	0.00127174
3	49784777	rs7374277	T	C	0.4918	-9.444	3.581e-21	-+++++--+--++--++-+-++-----+-++-+++-++++++++-+++-----+++++++++-++-++++--++++	0.1897	12.3484	300486	1.848	0.06467	0.2167	14.3249	2.41	0.01593	0.3003	10.5119	5.156	2.521e-07	0.6594	0	0.6594	0	-0.0056387	0.001745	0.00123197
3	49788969	rs7372966	T	C	0.4926	-9.443	3.627e-21	---+--++-++-+-++-+-++-+-+++++++++-+--++++----+++++-++++++----+++--++---+++++	0.07153	19.9009	300486	2.048	0.04058	0.004667	40.3546	1.738	0.0823	0.8579	0	5.26	1.442e-07	0.6023	0	0.6023	0	-0.0056608	0.0017458	0.0011844
3	49792023	rs9872864	A	G	0.493	-9.443	3.631e-21	+++++-++++---+++-+++-+++-?++-+-+-++-++-+-+-+++++--+++++0+++-++++++--+---++++	0.6134	0	300108	2.704	0.006846	0.5194	0	2.134	0.03283	0.4644	0.0799361	4.316	1.59e-05	0.7234	0	0.7234	0	-0.0056375	0.0017461	0.00124366
3	49853073	rs6775384	A	G	0.4909	-9.438	3.812e-21	+-++?++-++++-++-?+-+??+-++++-+-+-+++-+-++-++-+-+--+++++++-+-+-+++---+--++-++	0.3108	7.00477	300105	3.068	0.002154	0.6179	0	0.924	0.3554	0.1172	25.1799	4.898	9.659e-07	0.2818	21.4248	0.2818	21.4248	-0.0057363	0.0017448	0.00101042
3	49804119	rs6809431	A	G	0.5067	9.436	3.864e-21	-+++-+++++--+-+--+-+-+--++-+++-++++-+++-+----+-++--+-?++-+--+++++--++++?++-+	0.4821	0	298407	3.836	0.0001252	0.6018	0	-1.212	0.2255	0.644	0	5.064	4.109e-07	0.502	0	0.502	0	0.0056607	0.0017458	0.00118522
3	49790544	rs7372725	A	C	0.5073	9.434	3.95e-21	----+++++--+-----++---++-+----+++--+--++++--++---+-+--+-+--+----+-++--+?----	0.3255	6.26504	300310	-2.684	0.007285	0.39	4.44567	-0.079	0.9369	0.4239	2.69436	-5.399	6.684e-08	0.3948	0	0.3948	0	0.0056176	0.0017457	0.00129152
3	49792158	rs9855505	T	G	0.492	-9.434	3.959e-21	+++--++--+----++-++-+-++---++-+--++-+++--+++--+++-++++++---+++----++++-++--+	0.249	9.52846	300486	1.651	0.09879	0.3566	6.28368	0.359	0.7197	0.6262	0	5.854	4.791e-09	0.1101	50.257	0.1101	50.257	-0.0056182	0.001745	0.00128351
3	49790682	rs7372730	C	G	0.4919	-9.429	4.144e-21	+-+??+??++-++++??+-???-?++?+-+-++++?++++++------++?++++-+-++---+-??++++?++++	0.1236	17.7494	292216	5.39	7.052e-08	0.1214	22.0958	-0.609	0.5425	0.7146	0	3.53	0.0004151	0.603	0	0.603	0	-0.0056228	0.001745	0.00127204
3	49785133	rs7374183	A	G	0.5077	9.425	4.288e-21	----+++++--+-----++---++-+----+++--+--++++--+----+-+--+-+--+----+-++--+?----	0.3096	6.93346	300310	-2.747	0.006019	0.4228	2.64087	-0.023	0.9818	0.3519	7.31863	-5.37	7.855e-08	0.4228	0	0.4228	0	0.0056432	0.0017454	0.00122405
3	49789664	rs7429353	A	T	0.5069	9.417	4.639e-21	++--+-+--+--+-++--++--+-+-++++-+------+---+-+----+?-+-++-+---+---+-+--+---+-	0.4191	2.41844	300049	-2.575	0.01004	0.581	0	-2.232	0.0256	0.2241	15.5477	-4.638	3.518e-06	0.4557	0	0.4557	0	0.0056221	0.0017457	0.00127997
3	49818555	rs9814765	T	C	0.4898	-9.4	5.435e-21	-++++-++++++-++------+++++++++--++++++--++-++-------------++-++++++-++++++++	0.04752	22.3377	300486	5.656	1.553e-08	0.2539	12.0802	-0.903	0.3663	0.2468	14.0056	3.166	0.001548	0.3427	10.0719	0.3427	10.0719	-0.0056403	0.0017447	0.00122546
3	49868455	rs7648987	A	G	0.5077	9.385	6.28e-21	+++-+-+-+--+-+--+--+++--++++++++-+---+-+++-----+--+-+++++++--++-++--+-++++++	0.321	6.41845	300486	2.917	0.003532	0.652	0	-0.338	0.7353	0.3774	5.62773	5.306	1.12e-07	0.0703	57.4528	0.0703	57.4528	0.0056597	0.0017445	0.00117733
3	49882349	rs2247036	T	C	0.4884	-9.374	6.991e-21	???----?+++++?-+--+++-+-++?+-+--+++-?++++++++++---++++-+???+-???+--+++--+-++	0.7224	0	277116	4.367	1.258e-05	0.6233	0	2.829	0.004662	0.6877	0	4.625	3.737e-06	0.2923	19.5495	0.2923	19.5495	-0.0056327	0.0017454	0.00124997
3	49858142	rs10865958	A	G	0.5077	9.364	7.654e-21	+-++--+-+-+-----++-++--+-+----+++----+--+-+++---+---+---+-+-+++-+++---++----	0.03972	23.3137	300486	-3.211	0.001321	0.2705	11.1111	-2.013	0.04413	0.02474	36.2055	-7.614	2.65e-14	0.8921	0	0.8921	0	0.0056312	0.0017448	0.00124911
3	49869631	rs13085679	A	G	0.4936	-9.363	7.782e-21	???--???++++++++--++++--++?+-+--+++-?+-++++++++---?+++-+???+-????---++--+-++	0.6898	0	276693	4.85	1.233e-06	0.5448	0	2.786	0.005335	0.7538	0	4.608	4.064e-06	0.2605	25.1684	0.2605	25.1684	-0.0056989	0.0017458	0.00109749
6	98398142	rs6928583	A	G	0.8244	-9.354	8.472e-21	+-+??+?+++-+-++-?+-??--?++-+++--++---++-+----+-++--+++-+-+-++-++--+++++?++++	0.03528	25.0375	299463	2.999	0.00271	0.2767	10.8653	-1.479	0.139	0.1114	26.9447	5.836	5.344e-09	0.618	0	0.618	0	0.00088112	0.0017123	0.606848
3	49869158	rs695238	A	C	0.5061	9.347	9.031e-21	-+-+++-++---+++-+---+++----+++--++----+-++-+-++-+--++-++++++-++-+---+--+++++	0.01612	27.5824	300486	1.106	0.2689	0.1421	19.3565	0.094	0.9252	0.1957	17.5507	6.74	1.583e-11	0.2939	19.2463	0.2939	19.2463	0.005554	0.001745	0.00145881
3	49866392	rs1128535	T	C	0.4936	-9.328	1.074e-20	-----+---+-----+-+--+-++-+----+-+-+++-+--+-+--+-++----+-+-+++--+--++-+------	0.06519	20.4818	300486	-3.964	7.383e-05	0.3795	5.02647	0.081	0.9351	0.2718	12.3525	-6.935	4.056e-12	0.01294	72.1862	0.01294	72.1862	-0.0056811	0.001745	0.00113162
3	49881134	rs2246832	A	T	0.5084	9.322	1.137e-20	-----+---+++-+---+-+-++-----+++-+-++--+--+-++--+++-+++---+--++--+++--++--+--	0.0885	18.4951	300486	-3.82	0.0001336	0.5557	0	0.399	0.69	0.09256	26.2319	-6.283	3.313e-10	0.1087	50.495	0.1087	50.495	0.0055757	0.0017464	0.00140994
6	98345853	rs6906737	A	T	0.4622	9.271	1.846e-20	-+++-+-++-++++----+-+--+--++++++++-+-+--++++----+----+++++-++---+++++++-++-+	0.2668	8.73581	300486	1.934	0.0531	0.6106	0	1.355	0.1754	0.1728	19.2463	5.609	2.03e-08	0.2531	26.4526	0.2531	26.4526	0.0033415	0.0017412	0.0549794
3	49868842	rs7645061	T	C	0.4933	-9.263	1.992e-20	---++++-+--+++-+-+-+-++-+--+++-+++++-++-+++-+++--++--+--+++-+-+++++-+++-++-+	0.8787	0	300486	2.386	0.01705	0.8666	0	0.771	0.4408	0.7215	0	5.298	1.168e-07	0.4357	0	0.4357	0	-0.0056631	0.001745	0.00117301
6	98464961	rs4562150	A	G	0.4226	9.246	2.33e-20	-+-++++++--+++++-+++--+++--+++++-+++-++-+-++++--++++-++-++++++-++++-+--+++-+	0.966	0	300486	3	0.002698	0.8595	0	1.308	0.1907	0.9691	0	5.408	6.371e-08	0.1644	41.1995	0.1644	41.1995	0.0016872	0.001738	0.331658
6	98310291	rs9320747	T	G	0.5423	-9.15	5.7e-20	-++??--+?---++-+?-??????-?--+?+-+--?+-+--?????+-+?--????-+---++--+??+++?----	0.6356	0	269442	-2.588	0.009646	0.7945	0	1.255	0.2093	0.5018	0	-5.219	1.801e-07	0.2641	24.5283	0.2641	24.5283	-0.0032733	0.0017458	0.0607855
6	98313223	rs1933721	C	G	0.5422	-9.148	5.773e-20	???--???++++++??-?++++--++?+-+--++--?+-++++++++---?+++-+????-????---++--+-++	0.6646	0	271373	4.664	3.1e-06	0.4761	0	2.889	0.003869	0.7629	0	4.501	6.757e-06	0.2932	19.3765	0.2932	19.3765	-0.0034397	0.001746	0.0488427
6	98333409	rs12189679	A	G	0.4566	9.128	7e-20	???--???++++++-+--++++--++?+-+--+++-?+-++++++++---?+++-+???+-????--+++--+--+	0.596	0	276693	4.918	8.728e-07	0.4107	3.65315	2.79	0.005273	0.7749	0	4.628	3.686e-06	0.2007	35.2471	0.2007	35.2471	0.0030863	0.0017463	0.0771792
6	98310484	rs9374896	T	C	0.4576	9.128	7.004e-20	+++-+++++-+--+---+-----+++-+-+---++-++-+++---++---++++++-++---+++--+++++++++	0.0005776	38.1474	300486	3.915	9.058e-05	0.06643	26.1884	-1.303	0.1925	0.01537	38.8927	4.763	1.904e-06	0.03404	65.3899	0.03404	65.3899	0.0034141	0.0017459	0.0505243
6	98330626	rs7744474	T	C	0.4611	9.119	7.555e-20	++++-+++++-+--++-+++-+--+-++-++--+-+-++-+-+--+----+--+--++-+-++++-+++++-++-+	0.09474	18.022	300486	4.05	5.123e-05	0.3331	7.58069	-1.35	0.1771	0.246	14.0574	4.774	1.803e-06	0.3172	14.9419	0.3172	14.9419	0.0030912	0.0017417	0.0759277
6	98464608	rs17813294	C	G	0.823	-9.119	7.613e-20	???--???+++++?-+--+++-+-++?+-+--+++-?+-++++++++---?+++-+???+-????---++--+-++	0.6998	0	275414	4.413	1.02e-05	0.5674	0	2.826	0.004716	0.7093	0	4.712	2.449e-06	0.2652	24.357	0.2652	24.357	0.0010048	0.0017128	0.557455
6	98332930	rs7775492	A	G	0.5391	-9.114	7.942e-20	++++-+-+-+++-++-?+-?++--+-++++---+--++--+++-++-+++++----++++++-+-+-+++--++++	0.744	0	300311	3.588	0.0003327	0.7012	0	0.337	0.7359	0.6827	0	4.469	7.855e-06	0.2509	26.8293	0.2509	26.8293	-0.0031103	0.0017419	0.0741652
6	98312143	rs1338549	T	G	0.4597	9.113	8.018e-20	-++-++-++-++-++++-++----+++?++++-++--+-++---++----+++0+++++--+++?-+-++-+++++	0.06137	21.0845	295410	4.857	1.19e-06	0.1986	15.7895	0.573	0.5668	0.1349	22.2878	5.357	8.442e-08	0.1123	49.8831	0.1123	49.8831	0.0034636	0.0017415	0.0467089
6	98332622	rs10484868	T	C	0.4608	9.106	8.534e-20	+-----+----+-+---+-++++----?-+------?-+----++--+-+--------++-----+++--------	0.265	8.91623	294211	-5.216	1.832e-07	0.4977	0	-0.724	0.4691	0.3803	5.44927	-7.366	1.756e-13	0.07201	57.1184	0.07201	57.1184	0.0031013	0.001742	0.075024
6	98331316	rs9490003	A	G	0.5392	-9.103	8.788e-20	-+++--+-----++--+---++++------++--+---+-+-+++-----++---+++----+++++-++------	0.4864	0	300486	-2.283	0.02241	0.4725	0	-0.893	0.3716	0.3608	6.67289	-5.171	2.332e-07	0.9983	0	0.9983	0	-0.0030955	0.001742	0.0755788
6	98330225	rs7756023	A	G	0.4608	9.103	8.801e-20	-++++-++++++-++------+++++++++--++++++--++-++-------------+++++++++-++++++++	0.0528	21.7397	300486	5.876	4.203e-09	0.229	13.5714	-1.003	0.3161	0.3618	6.60897	3.179	0.001479	0.3911	0.0999001	0.3911	0.0999001	0.0030901	0.001742	0.0760852
6	98329264	rs12662607	C	G	0.4608	9.102	8.857e-20	???++???------?-++----++--?-+-++---+?-+--------+++?---+-???-+????+++--++-+--	0.663	0	274440	-4.903	9.451e-07	0.5052	0	-2.822	0.004779	0.7624	0	-4.599	4.249e-06	0.2566	25.8527	0.2566	25.8527	0.0031012	0.001742	0.0750412
6	98331357	rs9320759	A	G	0.5392	-9.102	8.906e-20	------++-++-+-++-+-++-+-+++++++++-+--++++----+++++-+++-++----+++--+++--+++++	0.04532	22.5998	300486	2.177	0.02951	0.001159	45.0685	1.693	0.09048	0.9222	0	4.988	6.108e-07	0.5095	0	0.5095	0	-0.0030924	0.001742	0.0758752
6	98331085	rs9490000	C	G	0.5392	-9.098	9.207e-20	--+--+-+?++++++-?+-?+?+-++?++-+-++++++-+-+-----++-+-++++-+++++++-++-+++-++-+	0.1315	16.0218	288581	4.62	3.836e-06	0.3384	7.42771	1.027	0.3044	0.1498	21.927	3.318	0.0009072	0.217	32.554	0.217	32.554	-0.0030814	0.001742	0.076913
6	98332567	rs10484867	A	G	0.4608	9.092	9.748e-20	-+++++-++++-+-+++-+----++++?+-++++++?+-++++--++-+-++++++++--+++++---++++++++	0.256	9.32128	294211	5.235	1.647e-07	0.4883	0	0.711	0.4773	0.3754	5.75521	7.36	1.837e-13	0.07182	57.1551	0.07182	57.1551	0.003102	0.001742	0.0749549
6	98331937	rs9401305	A	C	0.5392	-9.089	9.978e-20	++++-----++-++++++-+++--+-?+++-+-++-?+----++--+++-+-++-+-++-++++-+-+++-?++++	0.2683	8.82383	295818	2.465	0.01371	0.4869	0	0.015	0.9878	0.2424	14.4896	5.371	7.82e-08	0.427	0	0.427	0	-0.0030398	0.001742	0.0809841
6	98314912	rs2039722	A	G	0.539	-9.081	1.072e-19	-++??-??-++--++???????-?+-??++-++++?++-++-+-++-+-+?+-+-----??+??+--++---++++	0.4162	2.7736	281709	2.924	0.003457	0.3674	6.32772	-0.559	0.5761	0.8615	0	7.012	2.355e-12	0.8101	0	0.8101	0	-0.0032965	0.0017417	0.0583848
6	98330025	rs9372620	A	G	0.4612	9.081	1.072e-19	----------++++--+---------+-+--++-++++-++---+-+-+--------+++--+----+--++----	0.7991	0	300486	-2.8	0.005115	0.8501	0	-3.32	0.000899	0.6407	0	-3.845	0.0001204	0.2806	21.6301	0.2806	21.6301	0.0031038	0.001742	0.0747997
6	98316447	rs9401250	T	C	0.4605	9.077	1.116e-19	++++++++++----++-+++++++++-+-++--+----+--+++-+-+-++++++++---++-++++-++--++++	0.7625	0	300486	2.736	0.006221	0.832	0	3.311	0.0009295	0.6103	0	3.883	0.0001034	0.2557	25.999	0.2557	25.999	0.0031899	0.0017418	0.0670502
6	98664414	rs62422687	A	G	0.1929	9.074	1.144e-19	+++----+--+-+-++-++-+-+++-++++++-++-++-+++---++++-+--+++-+---++++--+++++++-+	0.1461	14.6942	300486	3.843	0.0001217	0.09727	23.0355	0.91	0.3626	0.6347	0	4.359	1.306e-05	0.03845	64.2815	0.03845	64.2815	-0.00069471	0.0017142	0.685283
6	98325884	rs4839927	A	G	0.4609	9.065	1.25e-19	+++----++-++++----------++-+-+---++--+--++---++---+-+-++-++++-+++--+++++++++	0.002078	34.7423	300486	4.287	1.81e-05	0.2241	13.8692	-1.475	0.1401	0.01177	40.2617	5.393	6.916e-08	0.08818	54.1144	0.08818	54.1144	0.003154	0.001742	0.070194
6	98328963	rs9387845	A	C	0.4609	9.063	1.27e-19	-+++--+-----++--+---++++----+-++--+---+-+-+++-----++---+++----+++++-++------	0.4923	0	300486	-2.282	0.02249	0.4835	0	-0.913	0.3614	0.3587	6.80915	-5.192	2.085e-07	0.9982	0	0.9982	0	0.0031481	0.001742	0.0707294
6	98326080	rs4839929	C	G	0.461	9.062	1.275e-19	-++-+-+++++++++++-++-++++++++--+-++-++-+++-+++++++--+-+-+-++-+-++---++++++++	0.8165	0	300486	3.55	0.0003858	0.7571	0	0.64	0.5221	0.6063	0	5.153	2.558e-07	0.7018	0	0.7018	0	0.0031594	0.001742	0.0697268
6	98326012	rs4839928	A	G	0.5391	-9.062	1.285e-19	--+--+-+-+---+----+---++------+-+--+--+----+-+---+-+-+++---------++---++----	0.7322	0	300486	-4.378	1.195e-05	0.9527	0	0.753	0.4516	0.5765	0	-5.037	4.72e-07	0.1317	46.6002	0.1317	46.6002	-0.003154	0.001742	0.070194
6	98325000	rs9387823	A	C	0.4609	9.056	1.35e-19	--+--+-+?++++++-?+-?+?+-+++++-+-++++++-+-+-----++-+-++++-+++++++-+--+++-++-+	0.2103	11.5992	291147	4.564	5.023e-06	0.4487	1.19829	0.93	0.3522	0.1733	20.0071	3.411	0.0006484	0.2489	27.1668	0.2489	27.1668	0.0031644	0.001742	0.0692787
6	98326863	rs2039719	A	G	0.4609	9.053	1.385e-19	???++???------??+?----++--?-+-++---+?----------+++?---+-????+????+++--++-++-	0.6713	0	271373	-4.692	2.704e-06	0.5428	0	-2.866	0.004151	0.7514	0	-4.454	8.421e-06	0.2392	28.8256	0.2392	28.8256	0.0031449	0.001742	0.0710232
6	98324132	rs12205774	T	C	0.4609	9.051	1.413e-19	???--+-?+++-+--++?+-+--+++??+-++-+++?+-++-+++++-+-?++++++++-+????---++++++++	0.791	0	275445	2.981	0.002873	0.8314	0	0.878	0.3802	0.7681	0	6.73	1.7e-11	0.1805	38.5624	0.1805	38.5624	0.0031611	0.001742	0.0695665
6	98324943	rs9401278	A	C	0.4609	9.046	1.481e-19	++-??-?--+-+++++?+????+?+-++-+++-+-?+++-+--+-++-++++--?-+---?-++--?++-+?++++	0.005483	34.2098	298083	1.968	0.0491	0.005195	40.6426	1.549	0.1213	0.2172	19.427	5.181	2.207e-07	0.3185	14.7	0.3185	14.7	0.0031632	0.001742	0.0693905
3	49470668	rs7646366	A	G	0.3054	9.04	1.573e-19	-+-+---+--+-++---++++-++-+--++--+-----+---+++--+++?++---++--+------+-+------	0.9243	0	300049	-3.408	0.0006545	0.9042	0	-0.171	0.8643	0.6486	0	-4.718	2.387e-06	0.9514	0	0.9514	0	0.0047216	0.0017416	0.00670811
6	98322282	rs4142530	T	C	0.5392	-9.039	1.587e-19	+++----+-++-----+-+-+-+++++---+--------+---+-+-++--+--+-+--+-+----+--+-+--+-	0.2481	9.571	300486	-1.94	0.05238	0.4967	0	-0.671	0.5025	0.3388	8.06007	-6.574	4.897e-11	0.4295	0	0.4295	0	-0.0031474	0.0017419	0.0707946
6	98331133	rs9490001	T	C	0.5443	-9.039	1.588e-19	--+--+-++-++-+--+---++-+++----+-+++-++-+++-+-+++++?+-+--+-+++-+++-+-+--+++-+	0.532	0	300049	2.589	0.009617	0.7191	0	2.271	0.02312	0.1982	17.3736	4.387	1.148e-05	0.6611	0	0.6611	0	-0.0030882	0.001742	0.0762781
6	98325541	rs9489980	A	G	0.5392	-9.036	1.632e-19	--++++-++-++++-+++--+-+++++++++++++--+-+++--+-++-+++---++++++++++---+++-++++	0.653	0	300486	3.914	9.075e-05	0.7816	0	-0.233	0.8155	0.3988	4.27569	4.312	1.616e-05	0.654	0	0.654	0	-0.003154	0.001742	0.070194
3	49455986	rs9859556	T	G	0.3054	9.033	1.67e-19	???-+???--?-+?++--+--+++-+?-++++--++?-----+++----+??+?+-???+-????-+-+-+?----	0.2072	13.1917	270884	-1.72	0.08547	0.7851	0	0.454	0.6498	0.1465	22.2037	-5.919	3.245e-09	0.4613	0	0.4613	0	0.0046826	0.0017413	0.00716308
6	98329165	rs12662596	A	G	0.4611	9.031	1.695e-19	???--???++++++?+--++++--++?+-+--+++-?+-++++++++---?+++-+???+-????---++--+-++	0.6577	0	274440	4.901	9.511e-07	0.4988	0	2.805	0.005027	0.7567	0	4.606	4.105e-06	0.2612	25.0375	0.2612	25.0375	0.0031442	0.001742	0.0710886
3	49473077	rs6446277	A	G	0.3069	9.025	1.791e-19	+---+---?---+---+----+----?---+++---+---+--+-++-+++-+?----++-++----+-++?--+-	0.003693	33.6653	286769	-4.584	4.564e-06	0.01106	37.4073	-1.877	0.06048	0.06381	30.3014	-3.436	0.0005908	0.3142	15.5168	0.3142	15.5168	0.0047339	0.0017445	0.00665426
3	49454277	rs10640	A	G	0.3055	9.024	1.81e-19	+-----+----+-+---+-++++------+------+-+--0-++--+-+---------+---+-+++--------	0.1676	13.4988	300486	-4.895	9.843e-07	0.3046	9.17348	-0.687	0.4923	0.3745	5.81439	-7.374	1.651e-13	0.08846	54.0652	0.08846	54.0652	0.0046726	0.0017415	0.00729625
6	98310571	rs9374897	A	G	0.4562	9.018	1.914e-19	+--+-----+----+++-++-+----+-+++----+-------+----+-+-+--++--+++-+-++---++----	0.638	0	300486	-2.831	0.004638	0.6628	0	-0.866	0.3864	0.7787	0	-4.779	1.764e-06	0.02512	67.8732	0.02512	67.8732	0.00343	0.0017459	0.0494652
3	49455330	rs11715915	T	C	0.3053	9.011	2.034e-19	-+--+--+-----++--++--++++?------------+---+-------++-+-+----+----+----+-----	0.6805	0	300108	-4.223	2.411e-05	0.8513	0	-2.777	0.005486	0.2284	15.2566	-5.391	6.999e-08	0.5634	0	0.5634	0	0.0046831	0.0017413	0.00715649
3	49408974	rs13087851	A	G	0.695	-9.007	2.123e-19	???--???++++++++--++++--++?+-+--+++-?+-++++++++---?+++-+???+-????---++--+-++	0.6874	0	276693	4.825	1.401e-06	0.5377	0	2.833	0.004617	0.7569	0	4.606	4.099e-06	0.2606	25.1497	0.2606	25.1497	-0.0047191	0.0017416	0.00673442
3	49477466	rs13079643	A	G	0.3055	9.005	2.149e-19	???--???++++++++--++++--++?+-+--+++-?+-++++++++---?+++-+???+-????---++--+-++	0.6579	0	276693	4.838	1.313e-06	0.4952	0	2.835	0.004584	0.7532	0	4.6	4.232e-06	0.2611	25.0749	0.2611	25.0749	0.0047607	0.0017416	0.00626758
3	49463287	rs6446272	A	G	0.306	9.004	2.173e-19	+++---++-+++--+-+-++-++-+-++++-+++-+-++-+++--+--++--++0++-++-++++---+-+-++++	0.3641	4.64081	300486	4.756	1.971e-06	0.1116	21.7757	1.557	0.1195	0.7837	0	3.368	0.0007579	0.7697	0	0.7697	0	0.0047218	0.0017428	0.00674373
3	49454112	rs9814873	A	G	0.6947	-9.002	2.225e-19	+---++-+++++--++-+++---+++++++--++-++-++-+---0++++--+++---++++-----+--+-++++	0.7697	0	300486	2.111	0.03478	0.7003	0	1.209	0.2267	0.5669	0	5.165	2.399e-07	0.9866	0	0.9866	0	-0.0046873	0.0017412	0.00710395
3	49475155	rs35115732	T	C	0.6948	-9	2.256e-19	???+-???++++-?+-?+-??---++?+---++++-?-+-+----+++--?+-?--???-+????++-+-+?++++	0.01421	32.0844	273057	2.694	0.007065	0.06379	32.5434	-0.812	0.417	0.1565	22.0042	6.555	5.583e-11	0.6386	0	0.6386	0	-0.0048006	0.0017414	0.00583848
3	49441091	rs11706370	A	G	0.3052	8.997	2.317e-19	-+--++-------+-------++++-----------?-+---+-------++-+-+---------++---+-----	0.5542	0	298560	-4.816	1.464e-06	0.9153	0	-2.831	0.004636	0.09868	25.6082	-4.931	8.17e-07	0.4205	0	0.4205	0	0.0047331	0.0017413	0.00656448
3	49458355	rs11922013	C	G	0.3061	8.996	2.332e-19	+-+--+++?+--+++-----+++-+++++-+-++--++-+++++-+----++-++++-+-++-+-+--+++-++++	0.7003	0	291414	5.384	7.265e-08	0.8007	0	0.28	0.7794	0.4658	0	5.363	8.172e-08	0.8472	0	0.8472	0	0.0046781	0.0017428	0.0072711
3	49438221	rs9871380	A	G	0.3064	8.996	2.334e-19	+++++-++++---+++-+-+-+++-?++-+-+-++-++-+-+-+++++--+++++++++-++++++--+---++++	0.6694	0	300108	2.819	0.00482	0.4991	0	2.36	0.01825	0.569	0	4.136	3.527e-05	0.8007	0	0.8007	0	0.0047203	0.0017428	0.00676083
3	49453834	rs6997	T	C	0.3061	8.993	2.397e-19	----++++++-+----------++-++---+++--+--++++--++-+++-+--+-+--+----+-++--+?----	0.2272	10.5881	300310	-2.528	0.01148	0.2752	10.8417	-0.313	0.7541	0.3535	7.21485	-5.511	3.573e-08	0.4727	0	0.4727	0	0.0046798	0.0017428	0.00724937
3	49416825	rs7648841	A	G	0.3057	8.982	2.654e-19	--+----+?++++++-?+-++?--+++++++-+++-++++++------+-++++++++++-+++-+--+++-++-+	0.106	17.5116	291242	5.813	6.127e-09	0.7934	0	0.248	0.8042	0.07042	29.4568	2.854	0.004316	0.1433	44.6903	0.1433	44.6903	0.0047189	0.0017416	0.00673752
3	49431853	rs11716974	A	G	0.3052	8.974	2.849e-19	+-+++--++-++-++-+-+++-++++++++-+++--++-+++-+-++----+-+++++++-+++----+++-++++	0.0236	25.893	300486	4.623	3.788e-06	0.1138	21.5917	-0.367	0.7139	0.134	22.3602	6.3	2.979e-10	0.2106	33.6136	0.2106	33.6136	0.0047294	0.0017413	0.00660693
3	49405164	rs67485053	A	G	0.6948	-8.973	2.887e-19	---+-+++----+--++-+++++---+--++--+--+-++----+---++---++-+++-++-----+---+----	0.3394	5.65444	300486	-2.99	0.002789	0.3738	5.33889	-0.846	0.3977	0.3067	10.0989	-5.004	5.626e-07	0.4778	0	0.4778	0	-0.0047188	0.0017415	0.00673752
3	49450449	rs6779524	T	C	0.3061	8.971	2.947e-19	--+-+-----+-++-++-----++-+-+++-++-+-+-++---++---++?-+--+--+-+------+---+--+-	0.2377	10.0993	300049	-4.585	4.545e-06	0.8315	0	1.009	0.3128	0.1345	22.318	-4.445	8.774e-06	0.2089	33.8916	0.2089	33.8916	0.0046802	0.0017428	0.00724436
3	49399259	rs1987628	A	G	0.305	8.968	3.007e-19	----++-+-----+-+--+-+++++-------------+-----+------+-+-+---+-----+----+-----	0.6162	0	300486	-3.781	0.0001565	0.7321	0	-2.573	0.01007	0.288	11.2977	-5.23	1.692e-07	0.4858	0	0.4858	0	0.0047259	0.0017412	0.00664661
3	49417243	rs6446264	A	C	0.3053	8.964	3.145e-19	----+++++--+-+----+---++-+----+-+--+--++++--+----+?+--+-+--+----+-+---+?----	0.4316	1.916	299873	-2.563	0.01039	0.3985	4.00709	-0.123	0.9024	0.5725	0	-5.674	1.398e-08	0.6184	0	0.6184	0	0.0047189	0.0017416	0.00673752
3	49412559	rs6809216	A	G	0.3059	8.96	3.251e-19	++++-+++++-+-+++++++-+--+-++++-+++-++++++++--+-++-?--+++-++-+-+++--+--++++-+	0.3286	6.13663	300049	4.058	4.945e-05	0.5452	0	1.391	0.1642	0.1402	21.8404	3.916	8.995e-05	0.4814	0	0.4814	0	0.0047267	0.0017428	0.00668652
3	49395757	rs1800668	A	G	0.305	8.959	3.263e-19	???--???+++++?-+--+++-+-++?+-+--+++-?+-++++++++---?+++-+???+-????--+++--+-++	0.684	0	275414	4.492	7.049e-06	0.5465	0	2.865	0.004165	0.712	0	4.636	3.546e-06	0.2782	22.0577	0.2782	22.0577	0.0047281	0.0017412	0.00662064
3	49434654	rs9878943	A	G	0.306	8.958	3.316e-19	--+--+-+?++++++-?+-?+?+-+++++-+-++++++-+-+-----++-+-++++-+++++++-+--+++-++-+	0.178	13.2549	291147	4.641	3.474e-06	0.4029	3.76548	0.99	0.3223	0.1708	20.2081	3.268	0.001084	0.247	27.4837	0.247	27.4837	0.0047222	0.0017428	0.00673907
3	49487487	rs71324962	A	C	0.6936	-8.953	3.45e-19	+++---++++---++?-+--+-+--+++++++----+-+-++--++-----+++-+---+-+++++-++++-++++	0.04408	22.8765	300127	3.548	0.0003885	0.1778	17.0019	1.287	0.1982	0.0203	37.3656	4.309	1.637e-05	0.8268	0	0.8268	0	-0.0047663	0.0017429	0.0062431
3	49414791	rs7623659	T	C	0.3057	8.953	3.467e-19	+-+---+--+-+--++-+--+-+---++++-+-++-+-++++++-+--+-++-+++-+--+---+--++--+++++	0.1897	12.3473	300486	1.25	0.2114	0.3748	5.28285	1.65	0.09887	0.2624	12.9728	5.871	4.34e-09	0.644	0	0.644	0	0.0048214	0.0017428	0.005665
3	49385417	rs13086611	A	T	0.6945	-8.952	3.506e-19	???++???------?-++----++--?-+-++---+?-+--------+++?---+-???-+????+++--++-+--	0.6848	0	274440	-4.871	1.113e-06	0.5278	0	-2.777	0.005482	0.765	0	-4.606	4.104e-06	0.2613	25.0375	0.2613	25.0375	-0.0045575	0.0017462	0.00905524
3	49389842	rs17080528	T	C	0.3058	8.949	3.603e-19	???--???+++++?-+--+++-+-++?+-+--+++-?++++++++++---?+++-+???+-????--+++--+-++	0.6961	0	275414	4.511	6.462e-06	0.5625	0	2.898	0.003755	0.7217	0	4.667	3.061e-06	0.2683	23.8192	0.2683	23.8192	0.0046482	0.0017426	0.0076454
3	49843723	rs3819325	T	C	0.5175	8.948	3.607e-19	-++++--+---++--+--++-+---+--+++++--+-----0+-+----+----+++-+-+++-++-+--+?----	0.5307	0	300310	-3.92	8.861e-05	0.349	6.69901	-1.085	0.2778	0.5769	0	-4.863	1.154e-06	0.5687	0	0.5687	0	0.0057958	0.0017454	0.000898256
3	49407660	rs34588335	C	G	0.3059	8.946	3.7e-19	-+-+--+-+-+-+---------++-+---+-++--++++++-----+-----------+-+-+--++--+++--+-	0.4306	1.94156	300486	-3.612	0.0003042	0.2517	12.2133	-2.279	0.02269	0.5562	0	-4.8	1.586e-06	0.4856	0	0.4856	0	0.004717	0.0017428	0.00679829
3	49427319	rs111903592	C	G	0.3059	8.944	3.756e-19	-----+---+-----+-+--+-++-+----+-+-+++-+--+-+--+-++------+-+++--+--++-+------	0.06316	20.6761	300486	-4.061	4.88e-05	0.3598	6.10769	0.036	0.9712	0.2652	12.7856	-6.935	4.065e-12	0.01368	71.8706	0.01368	71.8706	0.0047175	0.0017428	0.00679204
3	49423274	rs35169793	A	G	0.6941	-8.943	3.795e-19	+++++-++++-+-++-+-+-+--+++++---++++-++-++-+--++---?---+++-++--++--+++--++-++	0.007135	30.916	300049	3.931	8.452e-05	0.1291	20.5508	0.325	0.7454	0.008741	41.6819	5.264	1.412e-07	0.2668	24.0699	0.2668	24.0699	-0.0047194	0.0017428	0.00677174
3	49563456	rs34196454	A	G	0.304	8.94	3.878e-19	+--++--++-+--++-?++-++---+++++-+-+--++++++++-+-+++--+-+++--++-+++++++++-++++	0.08314	19.0248	300406	3.082	0.002056	0.2086	14.8302	2.195	0.02816	0.06284	30.0413	5.287	1.243e-07	0.5571	0	0.5571	0	0.0048147	0.0017414	0.00569377
3	49424283	rs6793308	T	C	0.3059	8.93	4.252e-19	+++----+-++---+-+-+-+--+-++---+-----+--+---+---++--++-++---+-+-----+---+--+-	0.8268	0	300486	-2.59	0.009593	0.772	0	-0.826	0.4089	0.7126	0	-5.312	1.085e-07	0.4514	0	0.4514	0	0.0047227	0.0017428	0.00673287
3	49513910	rs12330269	A	G	0.304	8.926	4.4e-19	???-????-+--+--+?-+??++?--?--+++--++?-----+++----+??+?+--+++-????--+-+-?----	0.01335	32.1403	276609	-2.449	0.01434	0.8421	0	1.428	0.1532	0.0169	41.9632	-7.944	1.951e-15	0.8199	0	0.8199	0	0.0048367	0.0017417	0.00548656
3	49493151	rs67216675	T	G	0.3041	8.926	4.429e-19	+---+---?---+---++-+-+----?---+++---+-+-+--++++-+++--?----++-++----+-++?--+-	0.005399	32.3945	286769	-4.383	1.168e-05	0.01271	36.751	-2.111	0.03479	0.07094	29.391	-3.46	0.0005397	0.3856	1.28332	0.3856	1.28332	0.0048417	0.0017417	0.00543876
3	49512588	rs9853683	A	G	0.696	-8.924	4.492e-19	???-+???-?-??--?-?+-++-+--???++??-?+??--?+--++++--??-?+-???+?????-+---??----	0.7304	0	242198	-2.108	0.03507	0.4978	0	0.288	0.7735	0.8367	0	-5.515	3.478e-08	0.6008	0	0.6008	0	-0.0048367	0.0017417	0.00548656
3	49522543	rs7630869	T	C	0.3053	8.923	4.542e-19	----+++++--+-----++---++-+----+++--+--++++--++---+?+--+-+--+----+-++--+?----	0.2483	9.67247	299873	-2.552	0.01071	0.2969	9.70341	-0.155	0.8767	0.4084	3.69608	-5.411	6.269e-08	0.3573	7.14949	0.3573	7.14949	0.0048331	0.0017424	0.00553988
3	49547561	rs7622302	T	C	0.6962	-8.916	4.849e-19	-+-+++-+?-++---+-+---+++--+---++--+++---+++++-++--?-+----++-+++--+++-+----+-	0.09132	18.4858	290977	-2.661	0.00778	0.393	4.34717	0.22	0.8256	0.175	19.0808	-5.454	4.918e-08	0.05922	59.6557	0.05922	59.6557	-0.0048259	0.0017414	0.00558342
3	49396360	rs3811699	T	C	0.6941	-8.915	4.878e-19	-+-++++++--+++++-+++--+++--+++++-+++-++-+-++++--++++++-+++++++-++++-+--+++-+	0.9465	0	300486	3.052	0.002276	0.8171	0	1.335	0.182	0.9589	0	5.461	4.727e-08	0.1553	42.7044	0.1553	42.7044	-0.0047174	0.0017427	0.00679047
3	49492481	rs9841110	C	G	0.6963	-8.915	4.889e-19	???+-++?+++---+?+?-+----++??+--+++----+++-++----++?++?-+----????+--++++?++++	0.2891	8.52961	275461	2.183	0.02904	0.07271	29.5701	-0.211	0.8331	0.8931	0	5.54	3.03e-08	0.4732	0	0.4732	0	-0.0048539	0.0017414	0.00531496
3	49558716	rs3926569	T	C	0.304	8.914	4.919e-19	+-+---++?+--+++-+-+-+---++-+++--++---+++-----+--++++-++++--+---++---+---++-+	0.03041	24.8136	291414	3.209	0.001332	0.3181	8.49796	-0.42	0.6741	0.05489	30.7495	5.988	2.121e-09	0.1333	46.3327	0.1333	46.3327	0.0047867	0.0017417	0.00599101
3	49539401	rs6766581	T	C	0.696	-8.914	4.92e-19	++++------+-+++++-++++--+-?+++---++-++----++--+---+-++-+-++-++++-+--++-?++++	0.2328	10.3866	297744	2.638	0.008342	0.2795	10.702	0.224	0.8228	0.3604	6.7734	5.513	3.537e-08	0.4672	0	0.4672	0	-0.0048014	0.0017417	0.00583848
3	49543288	rs9858418	A	G	0.6945	-8.913	4.975e-19	--+-+-----+-++--+---+-++----+--++-+-+--+-+-++-+++++-+-++--+-+----------+--+-	0.1093	16.9886	300486	-3.841	0.0001224	0.3837	4.79137	1.402	0.1608	0.2432	14.249	-4.795	1.624e-06	0.3197	14.4812	0.3197	14.4812	-0.0048026	0.001743	0.00586273
3	49525958	rs11719996	T	C	0.6951	-8.912	4.992e-19	???++???------?-++----++--?-+-++---+?-+--------+++?---+-???-+????+++--++-++-	0.6602	0	274440	-4.979	6.389e-07	0.6138	0	-3.015	0.002571	0.687	0	-4.764	1.902e-06	0.2356	29.4284	0.2356	29.4284	-0.0048265	0.0017418	0.00558856
3	49394834	rs1050450	A	G	0.3056	8.909	5.159e-19	-++-++-++++-+-+++-+----++++?+-++++++?+-++++--++-+-++++++++--+++-+---++++++++	0.2955	7.5809	294211	5.018	5.211e-07	0.5154	0	0.814	0.4154	0.372	5.97085	7.316	2.554e-13	0.09198	53.4306	0.09198	53.4306	0.004702	0.0017427	0.00697429
3	49537712	rs34363169	A	G	0.304	8.905	5.333e-19	--+---+--++----++----+++--+-+-+++--+-+---0-+---++++--+++-----------+--++----	0.4351	1.76045	300486	-2.833	0.004608	0.6204	0	0.321	0.7482	0.5736	0	-6.455	1.079e-10	0.3667	5.27313	0.3667	5.27313	0.0048014	0.0017417	0.00583848
3	49539222	rs6797664	A	G	0.304	8.905	5.353e-19	+---+---?---+---++-+-+----?---+++---+-+-+--++++-+++--?----++-++----+-++?--+-	0.005142	32.5621	286769	-4.365	1.269e-05	0.01068	37.5698	-2.037	0.04168	0.07675	28.6897	-3.472	0.000516	0.3877	0.85922	0.3877	0.85922	0.0048014	0.0017417	0.00583848
3	49391082	rs13090388	T	C	0.3049	8.901	5.521e-19	???++???--------++----++--?-+-++---+?-+--------+++?---+-???-+????+++--++-+--	0.6855	0	276693	-4.82	1.434e-06	0.5366	0	-2.852	0.004346	0.7568	0	-4.601	4.196e-06	0.2598	25.2802	0.2598	25.2802	0.0046602	0.0017427	0.00749204
3	49529482	rs9850072	T	C	0.3041	8.899	5.643e-19	--++-++-++---+-+-+--++-++-+++---+++-++--++-++-++-++++-+++++----+---++++-++++	0.1519	14.3601	300486	3.778	0.0001578	0.3617	6.00179	-0.076	0.9393	0.1625	20.0426	4.33	1.494e-05	0.2242	31.3501	0.2242	31.3501	0.0048003	0.0017417	0.00585194
3	49543656	rs9821311	T	C	0.3045	8.896	5.781e-19	++-+--++-+++-+-++-+----+--++++-++++++++++--+-+-+-++++++++-++-+-+-++-++--+-++	0.5263	0	300486	2.926	0.003437	0.4849	0	0.694	0.4876	0.7596	0	4.716	2.399e-06	0.04079	63.7155	0.04079	63.7155	0.0048026	0.001743	0.00586273
3	49555963	rs7633271	T	C	0.6965	-8.892	6.024e-19	-----+----+++-+-----+---+?--+---+--+----+-+-----++---------+------++-++-----	0.476	0.0864118	300108	-3.263	0.001104	0.4441	1.4629	-2.814	0.00489	0.3796	5.49097	-3.807	0.0001407	0.7512	0	0.7512	0	-0.0047638	0.0017417	0.00623591
3	49514764	rs9827021	A	C	0.3046	8.891	6.03e-19	+-------?---+---++-+-+--------++----+--++--+-++-+-+-+?----+--++-+--+-+-?--+-	0.04808	22.6447	289335	-3.882	0.0001038	0.0856	24.3849	-1.873	0.06105	0.1038	25.7708	-3.519	0.0004336	0.4292	0	0.4292	0	0.0048245	0.001743	0.00564157
3	49525096	rs9818590	A	G	0.6954	-8.887	6.29e-19	+-+-+-----+-++-++-----++-+--++-++-+-+-++---++--++++-+--+--+-+------+---+--+-	0.3059	7.05053	300486	-4.148	3.349e-05	0.8475	0	1.001	0.317	0.1679	19.6249	-4.405	1.06e-05	0.1884	37.2647	0.1884	37.2647	-0.0048261	0.001743	0.005626
3	49570200	rs1801143	T	C	0.3044	8.882	6.582e-19	???--???+++++?-+--+++-+-++?+-+--+++-?++++++++++---?+++-+???+-????--+++--+-++	0.6723	0	275414	4.502	6.742e-06	0.5313	0	2.884	0.003926	0.7118	0	4.622	3.796e-06	0.2767	22.32	0.2767	22.32	0.0048356	0.0017426	0.00552205
3	49537839	rs35261698	C	G	0.6954	-8.881	6.614e-19	+++--+-+-+---+----++--++------+-+--+--+----+-+---+-+-+++---------++---++----	0.6865	0	300486	-4.314	1.605e-05	0.962	0	0.787	0.431	0.4975	0	-5.387	7.164e-08	0.1183	48.8665	0.1183	48.8665	-0.0048027	0.001743	0.00586138
3	49559485	rs13062429	A	G	0.3076	8.881	6.639e-19	???++???--------++----++--?-+-++---+?-+--------+++?---+-???-+????+++--++-+--	0.6727	0	276693	-4.838	1.311e-06	0.5175	0	-2.83	0.004657	0.7538	0	-4.605	4.128e-06	0.2621	24.8873	0.2621	24.8873	0.0047568	0.0017439	0.00637823
16	28865042	rs62037363	T	C	0.61	8.88	6.712e-19	---++----+-++-+++-+++++-----+-+++--+------+++--+++-+----+----+---++---------	1.221e-05	45.7469	300486	-4.344	1.397e-05	0.00685	38.8276	0.981	0.3267	0.002139	47.2917	-4.856	1.2e-06	0.0518	61.2203	0.0518	61.2203	0.0015756	0.0017374	0.364469
3	49538932	rs6766131	T	C	0.6954	-8.875	6.972e-19	+---+---?---+---++-+-+----?---+++---+-+-+--++++-+++--?----++-++----+-++?--+-	0.005313	32.4498	286769	-4.37	1.245e-05	0.01085	37.4979	-2.037	0.04168	0.07722	28.6351	-3.484	0.0004933	0.3971	0	0.3971	0	-0.0048027	0.001743	0.00586138
16	28865892	rs7205323	T	C	0.3902	-8.866	7.603e-19	-+---+---+--++-+-+--+-++-+-----++--+--+--+----+-+++---+++-++++---+++-++-----	0.003153	33.4865	300486	-1.969	0.04897	0.02239	33.2053	0.452	0.6511	0.2879	11.3056	-6.221	4.94e-10	0.0338	65.4537	0.0338	65.4537	-0.0015336	0.0017374	0.377398
16	28871853	rs11859512	T	C	0.39	-8.863	7.815e-19	-+-++--+---+---+--+------+?-++--+--+------+-+----+----+-+-+++-+-+--+--+?----	0.6756	0	297744	-4.197	2.702e-05	0.335	7.54569	-2.323	0.02016	0.9125	0	-5.521	3.372e-08	0.1427	44.7819	0.1427	44.7819	-0.001598	0.0017374	0.357709
16	28871860	rs11861132	A	G	0.6097	8.854	8.434e-19	----++-+-----+---++--++++-----+-------+------------+-+-+----+----+----+-----	0.8991	0	300486	-4.697	2.645e-06	0.8557	0	-1.914	0.05563	0.6656	0	-5.283	1.273e-07	0.4251	0	0.4251	0	0.0015999	0.0017374	0.357125
16	28868962	rs62037365	C	G	0.6097	8.853	8.493e-19	+---+---?---+----+---++-------++--------+--++++-+++--?----++-++----+-++?--+-	0.004163	33.101	289335	-4.573	4.799e-06	0.007579	38.7428	-1.812	0.06993	0.08621	27.6112	-3.62	0.0002947	0.3638	5.83804	0.3638	5.83804	0.0016732	0.0017373	0.33549
16	28889486	rs3888190	A	C	0.3907	-8.85	8.732e-19	---++++-+--+++++-+-+-+--+--+++-++++++++-+++-+-+--++-++-+-++-+-++++-++-+-++-+	0.2492	9.51973	300486	1.952	0.05092	0.5011	0	0.659	0.5097	0.3396	8.01214	6.59	4.397e-11	0.4256	0	0.4256	0	-0.0015797	0.0017374	0.36322
16	28871191	rs12448902	C	G	0.6182	8.847	8.967e-19	-+--++-+-----+-+--+--++++-------------+---+-+-----++-+-+---------+-+--+-----	0.6949	0	300486	-3.743	0.0001819	0.8805	0	-2.366	0.01798	0.203	17.0262	-5.628	1.823e-08	0.5922	0	0.5922	0	0.0015026	0.0017395	0.387686
16	28875204	rs11864750	A	T	0.6091	8.845	9.16e-19	-+-++---?-++---+++++---+-----+-+---+--+--+----++++--+----+-+--+-+-++---+----	0.5743	0	291414	-5.389	7.087e-08	0.7186	0	-0.182	0.8554	0.3962	4.44338	-5.443	5.244e-08	0.8252	0	0.8252	0	0.0015977	0.0017374	0.357783
6	98322872	rs4580876	A	G	0.4724	8.845	9.183e-19	+--+++--+-++-+----+++--+------+---+++----+-------+-++++--+---+-+--++---+--+-	0.8068	0	300486	-5.033	4.839e-07	0.5152	0	-0.09	0.9283	0.9271	0	-4.26	2.046e-05	0.8482	0	0.8482	0	0.0029954	0.0017414	0.085428
16	28874547	rs62037367	C	G	0.6096	8.844	9.215e-19	???++???-?-??-??+?----++--???-+??-?+??+-?------+++??--+-?????????+++--++-+--	0.6898	0	242558	-2.904	0.003687	0.407	3.33494	-2.761	0.005763	0.728	0	-4.484	7.318e-06	0.2866	20.5508	0.2866	20.5508	0.0015981	0.0017374	0.357668
16	28867804	rs4788101	T	C	0.3904	-8.844	9.251e-19	-++--+-+-+---+----+---++------+-+--+--+----+-+---+-+-+++---------++---++----	0.7333	0	300486	-4.39	1.132e-05	0.9523	0	0.74	0.4594	0.5745	0	-5.043	4.591e-07	0.1347	46.1013	0.1347	46.1013	-0.0015567	0.0017373	0.370246
16	28875482	rs7193733	A	G	0.6095	8.842	9.429e-19	-+---------+-----+--+++--+++--+-0-----++----+-+-+--+--++--+++-+-++-+---+-+--	0.1852	12.5742	300486	-4.396	1.1e-05	0.068	26.0068	-0.92	0.3574	0.6206	0	-3.753	0.0001749	0.4132	0	0.4132	0	0.0015977	0.0017374	0.357783
16	28871989	rs11861174	A	G	0.6095	8.84	9.566e-19	+---+-----+-+--+?-+??++?--+---++--++------+++-+--+-++?+--+-+-------+---?----	0.06456	21.258	297982	-3.171	0.001517	0.4415	1.60628	1.331	0.1834	0.2859	12.4279	-7.7	1.364e-14	0.5974	0	0.5974	0	0.0015999	0.0017374	0.357125
16	28875122	rs7198606	T	G	0.6095	8.84	9.584e-19	-++++-+++++++++------+++++-+++--++++++-+++-++----+-+++----++-++++++-+++++++-	0.2026	11.7065	300486	5.635	1.752e-08	0.4669	0.18964	-0.133	0.8943	0.3972	4.37942	3.176	0.001491	0.2538	26.3261	0.2538	26.3261	0.0015977	0.0017374	0.357783
16	28873398	rs4788102	A	G	0.3904	-8.84	9.589e-19	+++----++-+-++-------+-+++-+-+---++-+++-++---++---+-++++-++++-+++--+++++++++	0.0004509	38.741	300486	4.374	1.218e-05	0.09192	23.5342	-1.148	0.2511	0.004429	44.5932	5.214	1.844e-07	0.09293	53.2637	0.09293	53.2637	-0.0016255	0.0017374	0.349486
16	28872598	rs6565229	T	C	0.6095	8.839	9.69e-19	-++--++-+++++-+++-++++-++++-+-+++++---++++--+++-+++-++-++++--+-++-+-++--++++	0.00399	32.7396	300486	1.828	0.06759	0.00517	39.9589	0.937	0.3489	0.1416	21.7242	5.925	3.124e-09	0.8476	0	0.8476	0	0.0015999	0.0017374	0.357125
16	28870596	rs11150609	A	G	0.6095	8.837	9.823e-19	+---+--+-+--++++-++++-----++-+++++--++++++---+++--+++++--++-+-++-+--+-+-+-++	0.0009722	36.8357	300486	3.862	0.0001125	0.1034	22.4851	1.959	0.0501	0.0008228	50.3328	6.407	1.481e-10	0.1273	47.3407	0.1273	47.3407	0.0015999	0.0017374	0.357108
16	28882424	rs7498603	T	C	0.6096	8.836	9.961e-19	---+---+--+++-+---+-+-++----++--+-----+---+++--+++?-+-0--+--+----+-+--------	0.9492	0	300049	-4.116	3.858e-05	0.955	0	-0.212	0.8325	0.6114	0	-4.187	2.83e-05	0.9982	0	0.9982	0	0.0015981	0.0017374	0.357651
16	28881202	rs8055982	A	C	0.6096	8.832	1.028e-18	------+++-+-------++--++-+-+-+-++-----+------+-++-----+-++-------+---+++----	0.8892	0	300486	-3.871	0.0001084	0.6809	0	0.055	0.9559	0.9327	0	-4.358	1.311e-05	0.4579	0	0.4579	0	0.001594	0.0017374	0.358881
16	28890131	rs62037371	A	C	0.3904	-8.829	1.056e-18	++---++-----++----++-++-------+---++--+++-+----+-+-++++++--+-+---+----------	0.488	0	300486	-3.949	7.837e-05	0.5214	0	-0.253	0.8006	0.5191	0	-4.688	2.759e-06	0.218	32.3867	0.218	32.3867	-0.0015796	0.0017373	0.363237
16	28891465	rs8055138	T	C	0.3903	-8.822	1.12e-18	++-+-+++++-+--++-+++-+--+-++-++--+-+-++-+-+--+----?--+--++-+-++++++++++-++-+	0.09554	18.0636	300049	3.974	7.06e-05	0.3419	7.15833	-1.403	0.1607	0.252	13.6566	4.804	1.557e-06	0.3167	15.0623	0.3167	15.0623	-0.0015917	0.0017373	0.359584
16	28885931	rs11864107	T	C	0.6096	8.809	1.267e-18	+---+-----+-+--+?-+??++?--+---++--++------+++-+--+-++?+--+++-------+---?----	0.05914	21.8051	297982	-3.184	0.001454	0.4388	1.75611	1.351	0.1768	0.2653	13.9013	-7.696	1.4e-14	0.5997	0	0.5997	0	0.0016021	0.0017374	0.356443
16	28879484	rs11863370	A	G	0.6097	8.807	1.282e-18	-+-++---?-++---+++++---+-----+-+--++--+--+----++++--+----+-+--+-+-++---+----	0.6197	0	291414	-5.355	8.563e-08	0.7594	0	-0.215	0.8294	0.4061	3.81533	-5.457	4.831e-08	0.819	0	0.819	0	0.0015812	0.0017374	0.362769
16	28864673	rs4788100	T	C	0.6104	8.803	1.335e-18	+-++---+-+-+++++--+-+--++-+++-+--++-++++++---+-+++-+-+--+-+---+++-+++--+++++	0.4832	0	300486	3.19	0.001421	0.6715	0	0.55	0.582	0.4072	3.74743	5.495	3.91e-08	0.1348	46.1013	0.1348	46.1013	0.0015507	0.0017374	0.372083
16	28893532	rs11641216	A	G	0.6106	8.791	1.488e-18	----+--+-----++--++--++++-------------+---+-------++-+-+---+-----+----+-----	0.6326	0	300486	-4.277	1.897e-05	0.9012	0	-2.53	0.01141	0.1483	21.1729	-5.545	2.932e-08	0.3801	2.47074	0.3801	2.47074	0.0015969	0.0017372	0.357981
16	28868695	rs62037364	A	G	0.3942	-8.787	1.534e-18	++++-+--++--++-+-+--+-+-++++-++++++-+++--+++-+--++-++-++-++++-++++-++-+-++-+	0.2623	8.93306	300486	5.386	7.205e-08	0.4609	0.527206	1.165	0.2438	0.3044	10.2441	3.186	0.001442	0.3322	12.1008	0.3322	12.1008	-0.0014765	0.0017377	0.395512
3	49597230	rs35999162	C	G	0.6932	-8.774	1.724e-18	--+++-++--+-----+-++--++-+----+---++--++--++--+++-+----+-+--++---+-+---+-++-	0.6083	0	300486	-4.599	4.251e-06	0.5852	0	0.262	0.7937	0.9094	0	-4.913	8.973e-07	0.04331	63.1223	0.04331	63.1223	-0.0051348	0.0017411	0.0031864
3	49603289	rs11926781	T	C	0.3068	8.763	1.904e-18	+++++++++-----+-+-++-+-++-++++++++-+-+-++-++++-+-++++++--+---++++---+-++++++	0.007091	30.7812	300486	2.731	0.006319	0.6687	0	0.552	0.581	0.001205	49.1775	7.329	2.324e-13	0.1646	41.188	0.1646	41.188	0.0051504	0.0017408	0.00309101
16	28895130	rs8061590	A	G	0.6092	8.759	1.963e-18	---++++---+++++-----++++-+--++++-+++--+++-++-+++-------+------+-+----+------	0.07021	20.0188	300486	-3.19	0.001423	0.04367	29.1822	-0.023	0.9819	0.3092	9.93696	-4.87	1.119e-06	0.8284	0	0.8284	0	0.0015845	0.001737	0.361651
16	28865916	rs7187333	A	G	0.3858	-8.752	2.104e-18	-----------+-----+--+++--+++--+--------+----+-+-+--+--++--+++-+-++-+---+-+--	0.1971	11.978	300486	-4.368	1.255e-05	0.07293	25.458	-0.899	0.3687	0.6289	0	-3.787	0.0001525	0.4078	0	0.4078	0	-0.0013799	0.0017395	0.427622
3	49597013	rs9837027	T	C	0.3078	8.748	2.168e-18	-+++---++++++-+-+-+++-+-++++---++-+-++++-+--++++++--+---++++--+++---++--++++	0.7226	0	300486	2.122	0.03383	0.311	8.80905	0.523	0.6008	0.9388	0	5.419	6.004e-08	0.9727	0	0.9727	0	0.005091	0.0017425	0.00348257
3	49610223	rs34427167	T	C	0.307	8.743	2.27e-18	-++--+-+-+---+----++--++------+----+--+-+--+-+---+-+-+++---------++---++----	0.5995	0	300486	-4.454	8.416e-06	0.9036	0	0.765	0.4441	0.5241	0	-5.332	9.706e-08	0.1181	48.8927	0.1181	48.8927	0.0051451	0.0017413	0.00312896
3	49597737	rs9858280	T	C	0.6922	-8.738	2.363e-18	--+-+----++-++--+---+-++----+--++-+-+--+-+-++-+++++-+-++--+-+----------+--+-	0.1033	17.4054	300486	-3.889	0.0001007	0.3723	5.41946	1.401	0.1613	0.2328	14.9563	-4.757	1.967e-06	0.3339	11.7647	0.3339	11.7647	-0.0050988	0.0017425	0.00343242
3	49574808	rs13079082	C	G	0.6926	-8.738	2.375e-18	???++???--------++----++--?-+-++---+?-+--------+++?---+-???-+????+++--++-+--	0.6579	0	276693	-4.838	1.313e-06	0.4953	0	-2.835	0.004584	0.7532	0	-4.6	4.232e-06	0.2611	25.0749	0.2611	25.0749	-0.0050731	0.0017427	0.00360247
16	28885659	rs7359397	T	C	0.3859	-8.737	2.386e-18	+++-+--+++++-+++-+++++--++-++++-+-++-+-++++-+++-+-++++-+-+++-+------++-++-++	0.4748	0.145122	300486	3.716	0.0002024	0.665	0	2.9	0.003733	0.3681	6.21483	3.478	0.0005044	0.1574	42.3631	0.1574	42.3631	-0.0014423	0.0017399	0.407127
16	28883841	rs62037369	T	C	0.386	-8.736	2.42e-18	+++---++++-+-+-?--++-++-++++++-+++--+++-+++-+++++--+++++++----++--+-++--++++	0.9907	0	300127	3.265	0.001095	0.973	0	1.761	0.07816	0.8351	0	4.643	3.427e-06	0.5888	0	0.5888	0	-0.0014181	0.0017399	0.41505
16	28871657	rs62037366	A	C	0.3862	-8.734	2.469e-18	--------+--++-----++----++------+-+---+-+-+++--++--++-+++++++-++-++--+------	0.6149	0	300486	-2.92	0.003505	0.4558	0.810871	-1.036	0.3001	0.6137	0	-5.203	1.965e-07	0.5998	0	0.5998	0	-0.001437	0.0017395	0.408762
3	49635354	rs11720597	A	G	0.3053	8.732	2.492e-18	+-+--+++?+--+++-----+++-+++++-+-++--++-+++-+-+----?+-++++---++-+-+--+++-++++	0.6082	0	290977	5.308	1.111e-07	0.718	0	0.199	0.8425	0.4216	2.83086	5.55	2.853e-08	0.9026	0	0.9026	0	0.0050482	0.0017411	0.00373852
16	28847246	rs12928404	T	C	0.5919	8.727	2.608e-18	???--???++++++++--++++--++?+-+--+++-?+-++++++++---?+++-+???+-????---++--+-++	0.649	0	276693	4.856	1.196e-06	0.4897	0	2.841	0.0045	0.7469	0	4.603	4.155e-06	0.263	24.7366	0.263	24.7366	0.0011375	0.0017399	0.513251
16	28870962	rs12446589	A	G	0.3866	-8.726	2.648e-18	???--???++++++?+--++++--++?+-+--+++-?+-++++++++---?+++-+???+-????---++--+-++	0.6557	0	274440	4.915	8.86e-07	0.5061	0	2.819	0.004814	0.7511	0	4.605	4.118e-06	0.2605	25.1684	0.2605	25.1684	-0.0014049	0.0017386	0.419044
16	28872354	rs7499337	C	G	0.3862	-8.724	2.693e-18	-+----+--+-++-++---++--+++-+++--+++-++-++-++-++-+-++++++----++-++-+++++-++++	0.2294	10.4253	300486	2.04	0.04137	0.6974	0	1.394	0.1634	0.03872	33.3126	5.378	7.524e-08	0.8852	0	0.8852	0	-0.0014378	0.0017395	0.408507
16	28883241	rs7498665	A	G	0.609	8.723	2.699e-18	--++?+++++++-++-?+-?---++--+++--++----+-+--+---+--?+++-+-+--+--+-++++++?++++	0.2282	10.7951	299592	2.065	0.03896	0.3278	7.95157	-0.375	0.7073	0.4362	1.86457	6.041	1.534e-09	0.9008	0	0.9008	0	0.0015971	0.0017375	0.358006
3	49619651	rs71324979	T	C	0.693	-8.723	2.714e-18	+-+++-+-+-+-----+-+-++++++-------+-+--+---++--+++-------+----+---+-----+-+--	0.05836	21.1522	300486	-2.852	0.004348	0.358	6.20237	0.193	0.8467	0.1178	23.7824	-5.442	5.28e-08	0.04671	62.3447	0.04671	62.3447	-0.0051267	0.0017412	0.00323743
3	49590770	rs3811697	T	C	0.3077	8.712	2.975e-18	-++---++-+--+-+++----++-++++++-+++---++++-+++++++-+----++-+++-+-++--+++-++-+	0.7594	0	300486	5.028	4.951e-07	0.4437	1.48269	0.1	0.9205	0.9198	0	4.369	1.249e-05	0.8412	0	0.8412	0	0.00507	0.0017426	0.00362076
3	49611457	rs11713474	A	G	0.6925	-8.711	3.001e-18	-+-++++++---+++++-----+-++-+++--+++---+--+++-++-+--++--+++---++-+-+++--+++++	0.08434	18.8224	300486	2.307	0.02107	0.4609	0.527206	1.021	0.3072	0.1084	24.6648	7.62	2.528e-14	0.5183	0	0.5183	0	-0.0051497	0.0017424	0.00312248
3	49579017	rs34293138	T	C	0.6924	-8.71	3.027e-18	-+-++++++--+++++-+++--+++--+++++-++++++-+-++++--++++++-+++++++-++++-+--+++-+	0.9681	0	300486	3.06	0.002214	0.8538	0	1.573	0.1157	0.9741	0	5.542	2.99e-08	0.1612	41.7476	0.1612	41.7476	-0.0050723	0.0017426	0.00360579
16	28857645	rs7187776	A	G	0.6029	8.707	3.128e-18	++++-----++-+++++--+++--+-++++---++-++----++--+++-+-++-+-+--++++-+--++-?++++	0.2743	8.45663	300310	2.894	0.003805	0.3743	5.30976	-0.067	0.9466	0.3414	7.98909	5.337	9.467e-08	0.4431	0	0.4431	0	0.0013121	0.0017395	0.450671
16	28893571	rs7498555	T	C	0.6142	8.703	3.245e-18	-++-+++---+-+-+-++-++---++-+-+-++-+-+---+--+++-+++?--+---+--+-----+---+-----	0.5871	0	300049	-2.004	0.04509	0.7242	0	-0.304	0.7613	0.6915	0	-5.831	5.512e-09	0.1433	44.6903	0.1433	44.6903	0.0014467	0.0017398	0.405667
3	49666964	rs1873625	A	C	0.298	8.699	3.338e-18	???--???+++++?-+--+++-+-++?+-+--+++-?++++++++++---?+++-+???+-????--+++--+-++	0.6565	0	275414	4.495	6.964e-06	0.5121	0	2.884	0.003921	0.7067	0	4.619	3.864e-06	0.2744	22.7401	0.2744	22.7401	0.0047667	0.0017407	0.00617305
3	49572140	rs4625	A	G	0.6941	-8.699	3.343e-18	++--+-+---+--+-+-++++--+-+--+++++-++--+---++--++++--++--++-+----++++--++----	0.784	0	300486	-3.215	0.001305	0.7333	0	0.998	0.3181	0.9461	0	-6.125	9.058e-10	0.5629	0	0.5629	0	-0.0047051	0.0017427	0.00693585
3	49624377	rs9811982	A	C	0.6925	-8.695	3.469e-18	----++----+-------+++-+---+--++---+---+--+--++-++++---+----+-+--++-+++---+--	0.7077	0	300486	-4.373	1.224e-05	0.7133	0	0.992	0.3212	0.8888	0	-4.223	2.414e-05	0.2239	31.3972	0.2239	31.3972	-0.005141	0.0017424	0.00317322
3	49634696	rs9875617	A	G	0.307	8.684	3.822e-18	++++--++-+++++--+-+---+-++++++-+++++-++-+++--+++++?+-+-+--+++++++--++-+-+-++	0.4816	0	300049	3.635	0.0002785	0.5144	0	2.096	0.03604	0.3312	8.53937	3.59	0.0003303	0.4879	0	0.4879	0	0.0051307	0.0017411	0.00321144
16	28853996	rs3088215	A	C	0.6104	8.679	3.991e-18	---+-++++++--++-?+-?+---+--++--+++---+-++-+--++++++++?+---+--+++-++++++?++++	0.2525	9.59215	298232	3.149	0.001637	0.2912	9.92614	-0.192	0.8474	0.5808	0	6.344	2.241e-10	0.3249	13.4948	0.3249	13.4948	0.0015065	0.0017373	0.385887
3	49664767	rs9837341	A	G	0.7014	-8.677	4.051e-18	-+-+--+----++++---+-+-++-+?---+-+-+++-+++--+--+-++---++--+---+-+-+++-+++----	0.2145	11.1933	297920	-3.045	0.002323	0.5484	0	-0.308	0.7581	0.0575	30.3831	-4.765	1.89e-06	0.8496	0	0.8496	0	-0.0047511	0.001741	0.00635331
3	49665976	rs6803222	T	G	0.7013	-8.677	4.056e-18	+-+-+++-++----+++--+-+--+-++---+-+++++-+++---++---?--+++--++-++++++-+-++++++	0.8592	0	300049	3.732	0.0001896	0.8377	0	0.263	0.7923	0.5623	0	4.617	3.891e-06	0.9509	0	0.9509	0	-0.0047545	0.001741	0.00631684
3	49642430	rs13064576	T	C	0.2995	8.673	4.218e-18	???++???------?-++----++--?-+-++---+?-+--------+++?---+-???-+????+++--++-++-	0.6459	0	274440	-4.893	9.929e-07	0.4773	0	-2.842	0.004479	0.765	0	-4.571	4.865e-06	0.2567	25.8344	0.2567	25.8344	0.0049716	0.0017417	0.00431122
3	49675334	rs11710037	C	G	0.7015	-8.669	4.344e-18	+---+-+----+-++--+--+++-+-------+---+-+----++-++-+----+--+-+---+-+++-+------	0.09173	18.2472	300486	-3.8	0.0001445	0.1283	20.4091	-0.166	0.8679	0.4088	3.64232	-6.772	1.274e-11	0.2162	32.675	0.2162	32.675	-0.004751	0.0017409	0.00635185
16	28825866	rs1987471	T	G	0.6128	8.667	4.434e-18	???--???+++++?-+--+++-+-++?+-+--+++-?+-++++++++---?+++-+???+-????--+++--+-++	0.6641	0	275414	4.499	6.815e-06	0.5309	0	2.785	0.00535	0.6909	0	4.63	3.66e-06	0.2812	21.5276	0.2812	21.5276	0.0014628	0.0017376	0.39988
16	28848818	rs12325278	A	G	0.6105	8.665	4.518e-18	???+????+-++-++-?+-??--?++?++---++--?+++++---+-++-?--?-++---+????++-+-+?++++	0.01639	30.9904	278163	2.492	0.01269	0.8106	0	-1.498	0.134	0.02924	38.5651	7.951	1.845e-15	0.7693	0	0.7693	0	0.0015086	0.0017373	0.385194
3	49650395	rs7614725	A	G	0.2992	8.663	4.58e-18	+-++---++++++-+--+-++--+--+----++++-++-+++-++++-+--+----+----++++---++--++++	0.1504	14.4461	300486	2.297	0.02159	0.3592	6.14074	-0.114	0.909	0.1402	21.8384	5.731	9.985e-09	0.9876	0	0.9876	0	0.0047524	0.0017418	0.00636209
3	49674458	rs9862080	A	G	0.7011	-8.658	4.79e-18	-+-+++++--+--+----+-+++++--+----+--+--+-+-+++--++-+++--++-++---+----+-------	0.1366	15.2485	300486	-1.07	0.2848	0.3098	8.87968	-0.972	0.3312	0.246	14.0623	-6.076	1.231e-09	0.9076	0	0.9076	0	-0.0047539	0.0017416	0.00634162
3	49674147	rs9824092	C	G	0.7011	-8.658	4.797e-18	--+++--++-++++--+-+-+++++++++--++++--+-+++--+-++---+++-++++++++++---+++-++++	0.8859	0	300486	3.069	0.002149	0.5541	0	0.18	0.8573	0.9739	0	4.803	1.565e-06	0.3894	0.464499	0.3894	0.464499	-0.0047523	0.0017416	0.00636063
6	98585502	rs17814604	A	G	0.7249	-8.656	4.871e-18	???--???+++++?-+--+++-+-++?+-+--+++-?+-++++++++---?+++-+???+-????--+++--+-++	0.7052	0	275414	4.48	7.461e-06	0.5765	0	2.88	0.003981	0.7199	0	4.644	3.412e-06	0.2719	23.1754	0.2719	23.1754	0.00078362	0.0017238	0.649397
3	49649989	rs9827708	C	G	0.701	-8.654	4.978e-18	---++----+---------+--+++-+--+++++-+--+------+++++-+----++--+---++++-+-+----	0.2141	11.1459	300486	-2.782	0.005402	0.04852	28.4705	-0.269	0.7882	0.7538	0	-4.995	5.894e-07	0.7353	0	0.7353	0	-0.0047513	0.0017418	0.00637529
3	49651210	rs9833611	A	G	0.2985	8.653	5.019e-18	----++--+---++++++--+--+-+----+---+-+-++---++-++--++-----+--+----+++-+-+----	0.269	8.6402	300486	-4.685	2.804e-06	0.06155	26.7641	-1.273	0.2032	0.8307	0	-3.084	0.002039	0.6346	0	0.6346	0	0.0047472	0.0017418	0.00642096
16	28855727	rs4788099	A	G	0.6104	8.653	5.035e-18	---++++--+-+--+++-+++-+---+-+-+++--+---+--+++--+++-+----+----+---++---------	0.000402	39.0095	300486	-4.4	1.081e-05	0.08712	23.9963	1.124	0.2608	0.004052	44.944	-5.185	2.156e-07	0.09252	53.3364	0.09252	53.3364	0.0015095	0.0017373	0.38492
16	28847149	rs55830740	C	G	0.3896	-8.649	5.208e-18	-+-+-+?+--++-----++++-+------+-+---+?---+-++---+-+-+-++++++-+------+--++--+-	0.09752	18.0199	298380	-4.172	3.022e-05	0.2915	10.1124	-0.841	0.4004	0.1083	24.6704	-4.497	6.877e-06	0.1257	47.6166	0.1257	47.6166	-0.0015006	0.0017373	0.387739
16	28845251	rs12444171	A	G	0.3896	-8.649	5.213e-18	???-+-+?---+-++--?-+-++---??-+--+---?-+--+-----+-+?--------+-????+++--------	0.821	0	275445	-2.981	0.002875	0.8369	0	-0.893	0.372	0.788	0	-6.704	2.022e-11	0.2149	32.9009	0.2149	32.9009	-0.0015062	0.0017373	0.385976
16	28844365	rs62036657	A	G	0.3896	-8.648	5.242e-18	-++-+-+++++++++-+-++-++++++++--+-++-++-+-+-+++++++--+-+-++++-+-++---++-+++++	0.7996	0	300486	3.509	0.0004493	0.7292	0	0.422	0.6729	0.6165	0	4.974	6.572e-07	0.7411	0	0.7411	0	-0.0015084	0.0017373	0.385265
4	106217358	rs2726513	T	G	0.4068	-8.648	5.262e-18	--+++-+---++---++-+-++++--+++++----+-----+--+--+-++++?+-+---+----+-+---?----	0.04317	23.1182	298407	-3.854	0.000116	0.5223	0	1.844	0.06524	0.09773	26.3855	-6.533	6.449e-11	0.5963	0	0.5963	0	-0.006093	0.0017374	0.000453211
16	28846840	rs56404918	T	G	0.6104	8.648	5.262e-18	???++???++?+-?+-?+-?+---++?+---++++-?++-+----++++-??-?--???--????++-+-+?++++	0.0639	23.8987	270709	3.486	0.0004899	0.4476	0.932139	-2.418	0.0156	0.4083	3.79805	6.132	8.688e-10	0.8254	0	0.8254	0	0.0015028	0.0017373	0.387035
16	28846866	rs55719896	A	G	0.3896	-8.647	5.31e-18	?????+???-?--?+-?+??????-??-+??+---??-?--?????-++??-???????-+???????--+?-++-	0.4618	0.213337	242362	-4.133	3.586e-05	0.4029	4.26458	0.126	0.8996	0.694	0	-4.625	3.755e-06	0.2503	26.9184	0.2503	26.9184	-0.0015053	0.0017373	0.386242
16	28844284	rs62036626	A	G	0.6104	8.647	5.31e-18	++++-+++?+++-+++?-+-+--+++++++--++++++++-++----+---++?++++--+--++++-+--?++-+	0.002766	34.5797	289255	4.643	3.442e-06	0.004234	41.0743	2.112	0.03468	0.0737	29.4487	3.456	0.0005481	0.7209	0	0.7209	0	0.0015085	0.0017373	0.385239
16	28854769	rs28403629	A	G	0.6104	8.644	5.433e-18	+--+++----++++----+++--+------+---+++----+-------+-++++--+---+-+--+----+--+-	0.7267	0	300486	-5.352	8.694e-08	0.5907	0	0.077	0.9383	0.8214	0	-4.662	3.133e-06	0.8175	0	0.8175	0	0.0015095	0.0017373	0.38492
16	28855522	rs61737565	C	G	0.3896	-8.644	5.45e-18	+-+----+-+++-++------++-+++++-++++++-+-+++++-++----+--+++--+-++++--+-++-++-+	0.5631	0	300486	2.533	0.0113	0.44	1.69092	1.561	0.1185	0.5518	0	5.322	1.028e-07	0.6688	0	0.6688	0	-0.0015095	0.0017373	0.38492
3	49575367	rs11130203	A	G	0.3074	8.643	5.476e-18	+-+-+-++?+--+++---+-+-+-++-+++--++---+++-----+--+-+--+++++-+-++++---+-++++++	0.1266	15.9521	291414	4.08	4.512e-05	0.7813	0	-0.967	0.3334	0.1202	23.5688	7.448	9.463e-14	0.3127	15.8013	0.3127	15.8013	0.0050748	0.0017426	0.00358922
16	28843118	rs56358680	A	G	0.6104	8.643	5.477e-18	++----+-----+-++----+-+---?-+-+-----+-----+++-+++++--+-+-++--++-++++---+----	0.6361	0	297920	-2.477	0.01324	0.3508	6.66284	-1.171	0.2414	0.7663	0	-5.628	1.822e-08	0.9102	0	0.9102	0	0.0015099	0.0017373	0.384796
16	28843025	rs55991577	T	C	0.3895	-8.64	5.598e-18	???+-++?-----?+-+?-----+--??+-++---+?-+-----+--+++?--++-???-+????++---+--+--	0.7236	0	270086	-3.698	0.0002177	0.5827	0	-2.071	0.0384	0.6375	0	-4.402	1.074e-05	0.3753	3.4749	0.3753	3.4749	-0.0015096	0.0017373	0.384884
16	28825605	rs2008514	A	G	0.3915	-8.639	5.658e-18	???++???-----?+?+?---+-+--?-+-++---+?----------+++?---+-???-+????++---++-+--	0.7172	0	273538	-4.418	9.966e-06	0.5971	0	-2.886	0.003901	0.7183	0	-4.636	3.555e-06	0.273	22.9782	0.273	22.9782	-0.0014642	0.0017376	0.399429
16	28837515	rs8049439	T	C	0.6024	8.639	5.658e-18	???+????++++--+-?+-??---++?+---+++--?-+-+----+--+-?--?--???++????++-+-+?++++	0.05499	24.7298	274230	2.636	0.008392	0.3241	9.72692	-1.963	0.04961	0.2816	12.7336	5.971	2.363e-09	0.8724	0	0.8724	0	0.0011842	0.0017399	0.496124
16	28859802	rs9972693	A	G	0.6104	8.638	5.732e-18	-+-++-++--+-+--+--+-++++--?++++----++--+-----+-+++?-+--+-+-+++-----+++------	0.07578	19.7502	297483	-3.22	0.001282	0.1439	19.6158	0.682	0.4952	0.2448	14.1434	-4.991	6.009e-07	0.434	0	0.434	0	0.0015154	0.0017373	0.38308
3	49644012	rs11917431	T	C	0.2987	8.637	5.775e-18	-+-+++--?-++---+++++---+-----+-+---+--+--+--+-++++--+----+-+--+-+-++---+----	0.4843	0	291414	-5.432	5.578e-08	0.6524	0	-0.145	0.8845	0.3419	7.86524	-5.384	7.288e-08	0.8789	0	0.8789	0	0.0049859	0.0017406	0.00417734
16	28860183	rs113079736	A	G	0.39	-8.633	5.974e-18	++++-++-+++++-++++-++----?++++++++++++-+++-+++++++--+-+-+++--++++-++++-+++++	0.6139	0	300108	4.326	1.519e-05	0.8758	0	2.666	0.00768	0.1748	19.096	5.566	2.608e-08	0.3269	13.119	0.3269	13.119	-0.0014721	0.0017376	0.396872
16	28861734	rs9972768	A	C	0.6104	8.633	5.975e-18	????????????????????????+????????+??????????????????????????????????????++?+	0.7088	0	190771	3.253	0.001143	0.972	0	NA	NA	NA	NA	4.577	4.71e-06	0.8441	0	0.8441	0	0.0015202	0.0017373	0.381575
16	28863451	rs72793815	A	G	0.389	-8.631	6.081e-18	-+-?-+-+?++++++-?+-?+?--+++++-+-+++-++-+-+-----++-+-+++--+++-+++-++++++-++-+	0.1192	16.8113	291011	4.759	1.947e-06	0.4453	1.39064	0.981	0.3267	0.08983	27.9798	3.467	0.000527	0.1619	41.6229	0.1619	41.6229	-0.0015202	0.0017373	0.381575
16	28825100	rs113029997	T	C	0.609	8.627	6.296e-18	-----+---+-----+-+--+-++-+----+-+-+++-+--+-+--+-++----+-+-+++--+--++-+------	0.06489	20.5104	300486	-3.955	7.651e-05	0.3783	5.09182	0.079	0.9369	0.2716	12.3653	-6.935	4.055e-12	0.01294	72.1862	0.01294	72.1862	0.001454	0.0017375	0.402708
16	28832382	rs72793809	T	C	0.3915	-8.626	6.328e-18	???-+--?---+++-?-?--++++--??-++---++?-------+++---?--?+-++++????-++----?----	0.4401	1.62896	273535	-2.558	0.01052	0.144	22.7409	0.204	0.8386	0.903	0	-5.539	3.04e-08	0.476	0	0.476	0	-0.001394	0.0017377	0.422425
16	28860237	rs12325014	C	G	0.61	8.625	6.389e-18	???++???------?-++----++--?-+-++---+?-+--------+++?---+-???-+????+++--++-++-	0.6375	0	274440	-4.915	8.89e-07	0.4984	0	-2.775	0.005516	0.7401	0	-4.638	3.524e-06	0.2343	29.6435	0.2343	29.6435	0.0015148	0.0017375	0.383301
16	28827498	rs62036617	T	C	0.6085	8.625	6.427e-18	+++-+-+---++++---+--++----++--+++------+---+--+++-------------+----+-++--+--	0.4711	0.293801	300486	-4.806	1.54e-06	0.4703	0	-2.335	0.01952	0.5867	0	-3.193	0.001408	0.2605	25.1684	0.2605	25.1684	0.0014642	0.0017377	0.399439
16	28825420	rs11860513	T	C	0.3914	-8.623	6.511e-18	-+-+++--?-++---+++++---+-----+-+---+--+--+--+-+++++-+----+++--+-+-++---+----	0.5545	0	291414	-5.406	6.463e-08	0.7076	0	-0.162	0.8715	0.3728	5.91777	-5.442	5.264e-08	0.8906	0	0.8906	0	-0.0014638	0.0017376	0.399549
16	28839930	rs62036624	T	G	0.3896	-8.62	6.668e-18	+-+++-+---+-+++--+-----+-+--++++--+--++-+-+----+------++-+--+-+++-+--+----+-	0.5193	0	300486	-2.775	0.005525	0.186	16.2865	-1.009	0.3128	0.8484	0	-5.33	9.838e-08	0.5919	0	0.5919	0	-0.0014109	0.0017373	0.416725
16	28839425	rs78613234	T	C	0.6104	8.618	6.811e-18	+-+--+-++++++-+--++-----++-+++-+++--+--+-++---+++++----++---+++-+-+-++++++-+	0.941	0	300486	3.261	0.00111	0.6933	0	0.321	0.7481	0.9632	0	4.724	2.315e-06	0.5456	0	0.5456	0	0.0014013	0.0017373	0.419894
3	49644193	rs11921590	T	C	0.7008	-8.616	6.921e-18	+++++-+++-----+-+-++-+-++-++++++++-+-+-++-++++-+-++++++--+---++++---+-++++++	0.005503	31.6697	300486	2.668	0.00763	0.6114	0	0.608	0.5432	0.001686	48.0978	7.363	1.794e-13	0.09841	52.2901	0.09841	52.2901	-0.0049733	0.0017417	0.00429833
16	28861881	rs56040780	T	C	0.3894	-8.616	6.95e-18	+--+++------++------+---------+-+--+--+-+----+----++-+++----+---++++--+-----	0.8187	0	300486	-3.382	0.0007199	0.8262	0	-0.481	0.6306	0.4878	0	-5.234	1.658e-07	0.9378	0	0.9378	0	-0.0015246	0.0017373	0.380181
16	28833299	rs62036621	A	C	0.3915	-8.616	6.962e-18	---+-+-+++---++++-++--++++--++---++++++-+++-++---++++-++++++++-++++-+--++-++	0.5366	0	300486	4.818	1.448e-06	0.4939	0	2.293	0.02188	0.6513	0	3.199	0.001378	0.2836	21.0942	0.2836	21.0942	-0.0014577	0.0017377	0.40155
16	28831359	rs4788095	T	C	0.6085	8.613	7.135e-18	---++++---++++++-+-+----+--+++-+++-+-++-++--+-+--++-0+---++++-+++++-+-+-++++	0.4434	1.42345	300486	1.88	0.06012	0.7455	0	0.908	0.3638	0.3391	8.04316	6.4	1.551e-10	0.4828	0	0.4828	0	0.0014501	0.0017377	0.403989
16	28833097	rs62036620	A	G	0.6085	8.612	7.151e-18	--++---+++-+--++-++---++++-+++--+++++++---+++++--+-+++-++-++++-+++--+--++-++	0.9395	0	300486	3.552	0.0003827	0.9489	0	2.359	0.01832	0.7576	0	4.183	2.878e-05	0.1297	46.9496	0.1297	46.9496	0.0014571	0.0017377	0.401726
16	28825777	rs1987472	T	C	0.3915	-8.612	7.185e-18	--+-++++-+-+++-+--+---+--++-+-++---+----+++++--+-+----+-+--++--++-++--+?----	0.4126	2.6828	300310	-2.618	0.008842	0.2428	12.7419	-1.323	0.1859	0.734	0	-6.645	3.032e-11	0.7081	0	0.7081	0	-0.0014646	0.0017376	0.399301
16	28825953	rs56186137	A	G	0.6085	8.607	7.486e-18	-+-++++-+++-++++-++++++-++-++-++-++-+++++++--++++-+++--+++-++-----+-++++++-+	0.7567	0	300486	3.042	0.002354	0.4474	1.28088	0.605	0.5449	0.908	0	5.437	5.425e-08	0.4179	0	0.4179	0	0.0014465	0.0017376	0.405126
16	28837906	rs8062405	A	G	0.6099	8.606	7.597e-18	++-++-+-?------+?-+?-?-+-----+-+------+-+-+++++--+-+----+-------+-++---+--+-	0.1674	13.8255	291147	-4.654	3.261e-06	0.3816	4.9476	-0.903	0.3663	0.1701	20.2622	-3.405	0.0006616	0.2377	29.0612	0.2377	29.0612	0.001291	0.0017374	0.457457
16	28836205	rs4451951	T	C	0.6079	8.565	1.077e-17	+----++-+++--++-++--+-+++-++-----++-++-++--+-+-++-++++-+-+-+---+-++-++-?++++	0.3685	4.48408	300310	3.545	0.000392	0.1936	15.7895	1.092	0.2748	0.5991	0	5.076	3.85e-07	0.4307	0	0.4307	0	0.0014616	0.0017377	0.400276
16	28840381	rs72793812	A	G	0.6136	8.561	1.115e-17	-+-+++-+-+++----+-+-+-+-+++----+-------+--+++-++++----+-------+-+-++-++---+-	0.3869	3.71407	300486	-2.166	0.03028	0.5603	0	-0.018	0.9854	0.4751	0	-5.863	4.553e-09	0.351	8.42491	0.351	8.42491	0.001305	0.0017403	0.453346
16	28848668	rs12325113	T	C	0.6152	8.557	1.162e-17	+----++-+++-+++-++-++++++-++--+++++-++++++-+-++-+-++++-+-+-----+-++-++-?++++	0.781	0	300310	4.244	2.196e-05	0.4419	1.58449	2.217	0.02659	0.9202	0	5.302	1.145e-07	0.2003	35.3169	0.2003	35.3169	0.0013554	0.0017398	0.435943
16	28826307	rs62036616	A	G	0.6132	8.535	1.403e-17	+-++-+-+--++-++-+++---+++++++0++++-+-+-+++++++-+++++-+-++++-++----+--+++++++	0.2472	9.61133	300486	2.343	0.01912	0.3619	5.99074	2.025	0.04283	0.245	14.1262	5.278	1.304e-07	0.3513	8.36897	0.3513	8.36897	0.0013032	0.00174	0.453889
4	106152111	rs12645144	T	G	0.6247	8.523	1.552e-17	???--???++++++++--++++--++?+-+--+++-?+-++++++++---?+++-+???+-????---++--+-++	0.6421	0	276693	4.858	1.185e-06	0.4703	0	2.887	0.003887	0.7631	0	4.596	4.312e-06	0.2503	26.9362	0.2503	26.9362	0.0070392	0.0017362	5.02574e-05
16	28841777	rs12443881	T	C	0.385	-8.522	1.574e-17	???--???++++++?+--++++--++?+-+--+++-?+-++++++++---?+++-+???+-????---++--+-++	0.6475	0	274440	4.927	8.358e-07	0.4985	0	2.857	0.004272	0.7526	0	4.584	4.565e-06	0.2588	25.4658	0.2588	25.4658	-0.0012984	0.0017395	0.455418
16	28839735	rs62036623	C	G	0.6149	8.521	1.579e-17	-+++-+-+++++-++-?+-??---++--+---+++--++++++--+-++----?-------++++++-+++?++++	0.3877	3.77478	298129	2.393	0.01672	0.4973	0	-1.109	0.2675	0.7549	0	6.411	1.449e-10	0.8797	0	0.8797	0	0.0012583	0.0017395	0.469451
16	28837203	rs62036622	T	G	0.6131	8.512	1.707e-17	-++--++-+++++-+++-++++-++++++-+++++---++++--+++-+++-++-0+++-++-++-+-++--++++	0.02059	26.5145	300486	2.128	0.03334	0.01382	35.6882	1.185	0.2362	0.2429	14.271	5.777	7.611e-09	0.8525	0	0.8525	0	0.0013046	0.0017401	0.45343
6	26569135	rs36162392	T	C	0.8906	-8.512	1.71e-17	+++++--+++++-++-+++++-++-+++++-+-+--++--+--+-++---?+-+++++++-+++----+++-++++	0.08013	19.2721	300049	4.088	4.36e-05	0.4295	2.28013	-0.537	0.5915	0.04745	31.8569	5.422	5.879e-08	0.6928	0	0.6928	0	0.0046623	0.0017411	0.00740969
16	28839392	rs72793811	A	G	0.3848	-8.505	1.821e-17	+--+-+------+----+--+-+-------+-+-++--+++--+-----+++-++++++-+-+--+++--++----	0.7156	0	300486	-3.069	0.00215	0.579	0	0.097	0.9227	0.7478	0	-5.189	2.115e-07	0.7038	0	0.7038	0	-0.0012658	0.0017398	0.466896
4	106164284	rs55838312	T	G	0.625	8.493	2.007e-17	+-+??---?-?++--+?-??????+-+-+??---+?--?--?????????--????+++-+----???-+-?--+-	0.5414	0	265734	-2.896	0.003785	0.492	0	NA	NA	NA	NA	-5.453	4.964e-08	0.6003	0	0.6003	0	0.0071134	0.0017361	4.18119e-05
16	28850371	rs62036658	T	G	0.6099	8.463	2.612e-17	+++--++++++-++-+-+-------+++-+++-++-+++--+++-++--++++--+--+++++---+-+-+-++-+	0.356	4.97067	300486	4.634	3.578e-06	0.5596	0	1.122	0.2619	0.1985	17.3485	3.803	0.0001432	0.4538	0	0.4538	0	0.0010992	0.0017399	0.527533
20	47723127	rs2426132	C	G	0.4563	8.448	2.956e-17	???----?+++++?-+--+++---++?+-+--+++-?++++++++++---++++-+???+-???+--+++--+-++	0.6929	0	277116	4.418	9.949e-06	0.5749	0	2.778	0.005472	0.7077	0	4.545	5.49e-06	0.2568	25.816	0.2568	25.816	0.0073934	0.0017427	2.21106e-05
4	106216205	rs12639764	T	C	0.6202	8.445	3.051e-17	???+????+-++-++-?+-??--?++?++---++--?+++++---++++-?--?-++---+????++-+-+?++++	0.01452	31.5461	278163	2.435	0.01487	0.8122	0	-1.492	0.1358	0.02623	39.2819	7.963	1.675e-15	0.7553	0	0.7553	0	0.0063107	0.0017357	0.000277204
3	49731861	rs9858213	T	G	0.2888	8.443	3.083e-17	???+-???++?+-?--++-++---+-?+-----+--?+++++---++-+-?+-?-+???-+????+-+-+-?++++	0.2149	12.6693	272438	1.794	0.07286	0.8203	0	-0.589	0.5555	0.1426	22.5384	5.926	3.108e-09	0.4668	0	0.4668	0	0.0046062	0.0017406	0.0081358
6	26550144	rs72845428	T	C	0.1093	8.443	3.085e-17	+++-+-+-+-+++-+++--+-+--++++++-+-+---+-+-------+--+-+++++-+--+-+++--++++++++	0.006106	31.3099	300486	2.757	0.005828	0.1804	16.6562	-0.966	0.3338	0.03154	34.6875	5.768	8.029e-09	0.1299	46.9121	0.1299	46.9121	-0.0045904	0.0017412	0.00838301
6	26562269	rs35277236	T	G	0.1092	8.44	3.161e-17	?????????+?+-??-?+?????????+???+++-??-?-+??????????????????++?????????+?++++	0.2486	16.4762	219574	2.022	0.04322	0.1509	27.0995	NA	NA	NA	NA	6.16	7.264e-10	0.8749	0	0.8749	0	-0.0045971	0.0017412	0.00828705
6	26530376	rs66941101	T	C	0.1094	8.433	3.357e-17	???+????++++-++-?+-??---++?+---+++--?-+-+----+-+--??-?--???++????++-+-+?++++	0.005447	36.2683	272676	2.83	0.004648	0.07975	30.4632	-1.847	0.06477	0.1029	27.3937	6.082	1.184e-09	0.9229	0	0.9229	0	-0.0045936	0.0017413	0.00833681
6	26529890	rs35433030	A	G	0.1094	8.428	3.527e-17	+--++-+-+-+++-++++--++--++++++-+-++-++-++++-+-+++-+-+---+++++++++--+++--++++	0.6654	0	300486	4.287	1.814e-05	0.9534	0	-0.798	0.4248	0.4998	0	5.399	6.717e-08	0.1161	49.2386	0.1161	49.2386	-0.004571	0.0017413	0.00866164
3	49730625	rs9852529	A	G	0.2892	8.427	3.561e-17	--+-+-++++-+-+++-++++-+++++-+-+++-++++-++-++--+--+++-+--++-++--+++---++-++++	0.352	5.13294	300486	2.802	0.005071	0.6839	0	-1.161	0.2456	0.4429	1.47136	5.531	3.18e-08	0.326	13.2948	0.326	13.2948	0.0045949	0.0017406	0.00829469
6	26549212	rs34246779	A	G	0.1093	8.426	3.563e-17	+++--+-+--++----+-++--++------+-+--+--+----+-+---+-+-+++---------++---++----	0.6496	0	300486	-4.814	1.481e-06	0.9115	0	0.903	0.3665	0.6148	0	-5.114	3.155e-07	0.1556	42.6606	0.1556	42.6606	-0.004586	0.0017412	0.00844501
4	106216459	rs13103161	A	T	0.3797	-8.421	3.733e-17	???++???------+-++----++--?-+-++---+?-+--------+++?---+-???-+????++---++-+--	0.5703	0	276693	-4.903	9.436e-07	0.3997	4.42816	-2.828	0.004684	0.75	0	-4.551	5.337e-06	0.2196	32.1267	0.2196	32.1267	-0.0063172	0.0017356	0.000273023
6	26563864	rs72844462	A	C	0.8906	-8.418	3.826e-17	???+-???++?+-?+-++-++-----?------+--?+++++---+--+-?+-?-+???-+????+++-+-?++++	0.3129	7.67785	272438	1.907	0.05648	0.7392	0	-0.289	0.7729	0.2196	16.5224	6.002	1.951e-09	0.7158	0	0.7158	0	0.0046046	0.0017412	0.00818088
4	106135316	rs62332760	T	G	0.3739	-8.406	4.231e-17	-++??+?-+++-?++-?+????+?+-++++++-++?--?-+-++-+-++-+++?+++-+-?-+++-?-+--?++-+	0.4369	1.77308	295889	3.143	0.001672	0.2763	11.1154	2.195	0.02815	0.7996	0	4.433	9.295e-06	0.1151	49.4098	0.1151	49.4098	-0.0069294	0.001736	6.56448e-05
4	106134316	rs6855629	A	G	0.3739	-8.39	4.881e-17	+---+-+--+----++++-+-++-++--------+-+-++----++++-++++-----+--+++-------+--+-	0.2651	8.81015	300486	-1.968	0.04903	0.6058	0	-1.308	0.1909	0.1714	19.357	-5.606	2.068e-08	0.2546	26.1811	0.2546	26.1811	-0.0069415	0.001736	6.37529e-05
4	106128108	rs62331159	A	G	0.3732	-8.367	5.909e-17	+--??-?+---+?--+?-????-?-+------+--?++?+-+--+-+--+---?-----+?+---+?+-++?--+-	0.5263	0	295889	-3.238	0.001202	0.2775	11.047	-2.068	0.03865	0.8805	0	-4.403	1.066e-05	0.1569	42.4405	0.1569	42.4405	-0.0069595	0.0017367	6.14328e-05
4	106199505	rs2647257	A	T	0.6257	8.366	5.984e-17	--+++++-+---++++-+-+-+--+--+++-+++++-++-+-+-+-+--++-++-+-+++++++++--+-+-++-+	0.396	3.3418	300486	3.17	0.001524	0.7808	0	0.119	0.9056	0.333	8.4305	6.427	1.3e-10	0.1169	49.1094	0.1169	49.1094	0.0068777	0.0017364	7.46621e-05
6	26511744	rs34148261	C	G	0.1092	8.361	6.244e-17	+--+++-++-++-++-+----++-+++--+++++--++-++++++++-+-?--+--++---+-+--++--++++++	0.1017	17.6121	300049	1.285	0.1988	0.2744	10.9995	2.442	0.01459	0.2885	11.2715	6.625	3.468e-11	0.5479	0	0.5479	0	-0.0046597	0.0017413	0.00744903
4	106204020	rs2647251	A	C	0.6266	8.359	6.35e-17	???+-???------?-+?----++--?-+-++--++?-+--------+++?---+-????+????+++--++-++-	0.6848	0	271732	-4.477	7.586e-06	0.5783	0	-2.851	0.004363	0.7175	0	-4.395	1.107e-05	0.2617	24.9437	0.2617	24.9437	0.0069344	0.0017375	6.57961e-05
4	106216367	rs2088483	T	C	0.614	8.351	6.759e-17	???----?+++++?-+--+++-+-++?+-+--+++-?++++++++++-+-?+++-+???+-???+--+++--+-++	0.7443	0	276679	4.36	1.302e-05	0.538	0	2.816	0.004868	0.7974	0	4.665	3.085e-06	0.2648	24.4332	0.2648	24.4332	0.0061293	0.0017387	0.000423253
4	106215673	rs13148166	T	G	0.5989	8.351	6.77e-17	???--???++++++++--++++--++?+-+--+++-?+-++++++++---?+++-+???+-????---++--+-++	0.6847	0	276693	4.821	1.425e-06	0.5288	0	2.819	0.004822	0.7596	0	4.608	4.071e-06	0.259	25.4288	0.259	25.4288	0.0064385	0.0017425	0.000219887
4	106196951	rs2454206	A	G	0.6258	8.344	7.209e-17	???++++?-----?+-++---+++--?-+-++---+?----------+++----+-???-+???-++---++-+--	0.6652	0	277116	-4.41	1.036e-05	0.5306	0	-2.779	0.00546	0.7061	0	-4.545	5.489e-06	0.2574	25.7058	0.2574	25.7058	0.0069404	0.0017371	6.46249e-05
1	41757993	rs1343775	A	G	0.7802	8.339	7.497e-17	???+????+-++-++-?+-??--?++?++---++--?+++++---++++-?--?-++---+????++-+-+?++++	0.01163	32.5269	278163	2.291	0.02195	0.8435	0	-1.591	0.1117	0.02237	40.2954	8.015	1.103e-15	0.7939	0	0.7939	0	-0.0012189	0.0017287	0.480729
1	41750648	rs12035012	A	C	0.2195	-8.336	7.7e-17	-+++-+++++-+-++-?+-??--?++-+++--++--++++++---+-++-+--?-++-+-+++++++-+++?++++	0.04013	24.0531	297982	3.168	0.001534	0.37	5.54677	-1.416	0.1568	0.2409	15.683	7.646	2.074e-14	0.572	0	0.572	0	0.0012448	0.0017286	0.471466
4	106212562	rs2726491	A	G	0.374	-8.335	7.73e-17	???--???+++++?-+--+++++-++?+++-++++-?++++++-+++---?+++-+???+-????--+++--+--+	0.7392	0	275414	4.163	3.147e-05	0.8379	0	3.241	0.001192	0.5571	0	4.396	1.104e-05	0.2942	19.181	0.2942	19.181	-0.0068076	0.0017364	8.8369e-05
6	26509382	rs35555795	T	C	0.1093	8.332	7.971e-17	+--+++--+-++-+---++++-++------+---+++----+-------+-++++--+---+-++-++---+--+-	0.7824	0	300486	-5.093	3.526e-07	0.4991	0	-0.024	0.9812	0.9189	0	-4.43	9.437e-06	0.851	0	0.851	0	-0.0046687	0.0017413	0.00733669
4	103188709	rs13107325	T	C	0.0729	-8.327	8.315e-17	???--???++++++?+--++++--++?+-+--+++-?+-++++++++---?+++-+???+-????---++--+--+	0.6327	0	274440	4.923	8.523e-07	0.4658	0	2.842	0.004484	0.7649	0	4.541	5.587e-06	0.2523	26.5786	0.2523	26.5786	0.0025798	0.0017109	0.131604
3	49697459	rs9836291	A	G	0.2922	8.322	8.616e-17	--++-++-++---+-+-+--++-++-+++---+++-++--++-++-++-++++-+++++----+---++++-++++	0.1553	14.1729	300486	3.767	0.000165	0.3479	6.76208	-0.026	0.9792	0.169	19.5387	4.322	1.543e-05	0.2359	29.3785	0.2359	29.3785	0.0044991	0.0017437	0.00987416
3	49686682	rs6770670	T	C	0.7094	-8.322	8.651e-17	--++?++++-++-++-?+-?----++-+++-+++---++-+--+-0-+--++++++-++-++-+-++++++?++++	0.3171	6.73112	300029	2.493	0.01268	0.4493	1.17356	-0.66	0.5095	0.4562	0.482278	5.973	2.329e-09	0.9314	0	0.9314	0	-0.0043018	0.0017419	0.013527
6	98421991	rs4587178	T	C	0.6137	8.321	8.714e-17	+++---+-+++++++++-----+-+-++--+++++++++-++-++-+-+--++-+-+++-++++---++++-++-+	0.219	10.9137	300486	4.46	8.2e-06	0.5514	0	0.262	0.7934	0.08102	27.4749	4.648	3.352e-06	0.6523	0	0.6523	0	0.0027536	0.0017462	0.114823
3	49678307	rs2172252	A	T	0.709	-8.321	8.747e-17	???++++?-----?+-++---+-+--?-+-++---+?----------+++----+-???-+???-++---++-+--	0.7121	0	277116	-4.385	1.158e-05	0.6161	0	-2.845	0.004438	0.6868	0	-4.622	3.805e-06	0.2786	21.9969	0.2786	21.9969	-0.0045487	0.0017408	0.00897429
6	26903585	rs71557378	T	G	0.898	-8.314	9.257e-17	+-+-+++-++-+-+++--++++-+++++---++----+-+-----++---++++-+-++++++++-+-+-++++++	0.6498	0	300486	3.429	0.0006067	0.4134	3.15708	0.689	0.491	0.636	0	4.625	3.741e-06	0.8977	0	0.8977	0	0.0039023	0.0017492	0.0256921
3	49682311	rs9812791	A	G	0.2915	8.312	9.443e-17	+++----+-+++++-+--+-+-+++-+--+-+++--+++--++--++--+--++++++---++++++++++-++-+	0.3689	4.44277	300486	3.824	0.0001314	0.1041	22.419	2.999	0.002709	0.8709	0	3.1	0.001933	0.5419	0	0.5419	0	0.0044636	0.0017419	0.010392
3	49689210	rs34762726	A	G	0.2905	8.309	9.626e-17	-++---++-+--+-++++---+--++++++-+-+---++++++++++++-?----++-+++-+--+--++--++-+	0.7148	0	300049	5.179	2.231e-07	0.371	5.53699	0.175	0.8612	0.9188	0	4.364	1.277e-05	0.9087	0	0.9087	0	0.0042944	0.0017419	0.0136899
4	106211443	rs2647268	A	G	0.6254	8.305	9.975e-17	++---+--++-+++++-+-+++--+-++++-+++--++--+++-++---+?++++-+-+++-+++-+-+++-++-+	0.4732	0.204984	300049	4.839	1.303e-06	0.3662	5.8062	-0.001	0.9994	0.9196	0	5.142	2.718e-07	0.04048	63.79	0.04048	63.79	0.0069018	0.0017361	7.02425e-05
4	106215370	rs2647228	A	T	0.4012	-8.3	1.042e-16	???----?+++++?-+--+++---++?+-+--+++-?++++++++++---++++-+???+-???+--+++--+-++	0.6513	0	277116	4.284	1.837e-05	0.5004	0	2.777	0.00549	0.705	0	4.546	5.47e-06	0.2581	25.5768	0.2581	25.5768	-0.0064374	0.0017427	0.000220902
3	49690496	rs11709525	T	C	0.2897	8.294	1.099e-16	-+--+--+-----++--++--++++?------------+---+-------++-+-+---++----+----+-----	0.6301	0	300108	-4.084	4.423e-05	0.8779	0	-2.581	0.009837	0.1788	18.7982	-5.603	2.107e-08	0.3725	4.0614	0.3725	4.0614	0.0042549	0.0017418	0.0145747
3	49696797	rs11718165	A	G	0.7092	-8.293	1.102e-16	---+-+---+-----+-+--+-++-++---+-+-++-----+-+--+-++----+-+-+++--+--++-+------	0.04278	22.9156	300486	-3.499	0.0004673	0.2945	9.74322	0.02	0.9842	0.2283	15.259	-7.057	1.699e-12	0.0217	68.9409	0.0217	68.9409	-0.004515	0.0017406	0.00949074
3	49678651	rs4283605	A	G	0.7085	-8.289	1.145e-16	-+-??-?---?-?--??-????+?--+-+++++-+?+-+----?+-++++---+----+-?+-++-?+---?----	0.151	16.0576	296101	-3.657	0.0002555	0.1672	18.3099	0.485	0.6277	0.3449	9.18318	-5.583	2.366e-08	0.876	0	0.876	0	-0.004555	0.001742	0.00892894
1	41761352	rs12731400	T	C	0.7798	8.283	1.201e-16	???--???++++++-+--++++--++?+-+--+++-?+-++++++++---?+++-+???+-????--+++--+--+	0.6065	0	276693	4.861	1.166e-06	0.4566	0.365327	2.814	0.004892	0.7219	0	4.615	3.923e-06	0.2506	26.8649	0.2506	26.8649	-0.0012736	0.0017297	0.461541
3	49684917	rs13316695	C	G	0.7085	-8.281	1.223e-16	???--???++++++?+-?++++--++?+-+--+++-?++++++++++---?+++-+???+-????---++--+--+	0.5945	0	272923	4.957	7.175e-07	0.4337	1.97826	2.843	0.004464	0.7543	0	4.495	6.961e-06	0.2482	27.2904	0.2482	27.2904	-0.0044789	0.0017419	0.0101321
1	41766761	rs12030762	T	C	0.7804	8.279	1.244e-16	+-+-+-++?+--+++-+---+-+-++-++++-++---+++--------+-?--++++--+-+-++---+-++++-+	0.1541	14.4026	290977	3.75	0.0001771	0.7174	0	-0.905	0.3654	0.2351	14.7994	7.038	1.952e-12	0.1331	46.3711	0.1331	46.3711	-0.0012221	0.0017279	0.479402
1	41762029	rs12030372	A	G	0.7797	8.277	1.259e-16	-+-??++-?+?-+??+?+????????---??---+?--?--?????????--????----++--+?????-?----	0.009122	38.6381	246054	-3.594	0.0003262	0.01446	37.9524	NA	NA	NA	NA	-6.322	2.587e-10	0.07979	55.6541	0.07979	55.6541	-0.0012661	0.0017297	0.464173
1	41769113	rs55707527	T	G	0.2158	-8.277	1.259e-16	-++--+---+-+++++-+++++--+-++++-+++---+++++--++----?-+++-+-+++-+++---+++-++-+	0.9263	0	300049	3.447	0.0005673	0.7983	0	0.303	0.7616	0.976	0	5.296	1.186e-07	0.1012	51.8072	0.1012	51.8072	0.001237	0.0017279	0.474078
1	41769114	rs36060279	A	T	0.7842	8.277	1.264e-16	---++++-+--+++++-+-+-------+++-++++++++-++--+-+--++-++-+-++-+-++++--+-+-++-+	0.2289	10.4499	300486	1.975	0.04829	0.5251	0	0.751	0.4524	0.2724	12.3115	6.605	3.968e-11	0.4213	0	0.4213	0	-0.0012403	0.0017279	0.472901
1	41761441	rs55859000	T	C	0.7798	8.276	1.272e-16	+++---+++--++++++--++----+-++---+-+-++--++++++--+-+-+++++++++++-+---+++-++++	0.6035	0	300486	2.67	0.007592	0.4779	0	-0.343	0.7314	0.8329	0	6.15	7.77e-10	0.8451	0	0.8451	0	-0.0012736	0.0017297	0.461541
1	41761715	rs12031068	T	C	0.7823	8.273	1.307e-16	???-+-+?---+-++--?-+-++---??-+--+---?-+--+-----+-+?--------+-????+++--------	0.7812	0	275445	-3.158	0.001591	0.8284	0	-0.941	0.3469	0.7257	0	-6.709	1.962e-11	0.1904	36.9483	0.1904	36.9483	-0.0012486	0.0017297	0.47036
1	41768271	rs12041533	T	C	0.2196	-8.273	1.309e-16	++++-++-+++++---+--++----?++++++++++++-+++-+++++++--+-+-+++--++++-++++-+++++	0.6248	0	300108	3.834	0.0001263	0.8717	0	2.622	0.008748	0.1887	18.0619	5.582	2.376e-08	0.3652	5.54156	0.3652	5.54156	0.0013731	0.0017301	0.427405
1	41777199	rs34073585	T	C	0.779	8.268	1.36e-16	+++--+-+--++----++++--++------+-+--+--+----+-+---+-+-+++---------++---++----	0.7149	0	300486	-4.765	1.891e-06	0.9462	0	0.869	0.3847	0.6296	0	-5.156	2.52e-07	0.1415	44.9844	0.1415	44.9844	-0.0010977	0.0017287	0.525436
1	41755189	rs35493284	A	T	0.2202	-8.268	1.363e-16	???+-???------??+?----++--?-+-++-+++?------+---+++?---+-????+????+++--++-+--	0.4696	0.239425	271373	-4.611	4.01e-06	0.4687	0	-2.694	0.007061	0.6446	0	-3.891	9.978e-05	0.1406	45.1353	0.1406	45.1353	0.0012678	0.0017297	0.463586
1	41764175	rs12037657	T	C	0.2206	-8.267	1.37e-16	-+-+-+--?-++---+-+++-+-+--+----+--+++---++++++++-+?++----++-+-+--+++-+----+-	0.1515	14.5529	290977	-3.679	0.0002346	0.714	0	0.901	0.3675	0.2374	14.6418	-7.073	1.519e-12	0.1342	46.198	0.1342	46.198	0.0012757	0.0017298	0.460819
6	98578215	rs6931604	T	C	0.5943	8.266	1.382e-16	+--++--+-----+---+----+------+-----++++---++-------+--+----+--+--+-+--++----	0.003771	32.9207	300486	-2.298	0.02159	0.006528	39.0253	-0.616	0.5382	0.08459	27.08	-5.595	2.208e-08	0.8068	0	0.8068	0	0.0044844	0.0017557	0.0106414
6	26609989	rs13212985	C	G	0.1091	8.263	1.415e-16	???++???------?-++----++--?-+-++---+?-+--------+++?---+-???-+????+++--++-++-	0.6191	0	274440	-4.908	9.195e-07	0.4733	0	-2.828	0.004683	0.7399	0	-4.54	5.631e-06	0.2516	26.7041	0.2516	26.7041	-0.0041282	0.0017419	0.017791
1	41755166	rs35318047	T	C	0.2202	-8.26	1.455e-16	+++--++++++++-+++-----+-+-++++++++-++++-+--++-+-+--++---+++-++++-+-++++-++-+	0.2114	11.2752	300486	4.888	1.019e-06	0.5815	0	0.011	0.9913	0.1446	21.4701	4.611	4.005e-06	0.2459	27.676	0.2459	27.676	0.0012728	0.0017297	0.461806
1	41768541	rs35502198	T	G	0.78	8.259	1.466e-16	+----+-+--+-+---+----+-------+-++-++--++-+--++-+----+-+---+-++++++-++--+----	0.07059	19.9855	300486	-2.013	0.0441	0.09325	23.4098	0.105	0.9163	0.6353	0	-6.937	4e-12	0.398	0	0.398	0	-0.0012213	0.0017287	0.479888
1	41757057	rs12035913	T	C	0.22	-8.259	1.474e-16	+---+-----+-+--+?-+??++?--+---++--++------+++-+--+-++?+--+++-------+---?----	0.05353	22.4083	297982	-3.21	0.001326	0.3982	3.99846	1.326	0.185	0.2396	15.7806	-7.578	3.516e-14	0.6302	0	0.6302	0	0.0012313	0.0017297	0.476563
1	41761429	rs12032756	A	G	0.2202	-8.258	1.484e-16	++-++-+++--++-+++---+--+++++---+-+--++-++++--++---+---++++-++-++----++-++-++	0.05731	21.2607	300486	3.799	0.0001453	0.5874	0	-0.148	0.8824	0.04036	33.0238	6.717	1.852e-11	0.1139	49.6137	0.1139	49.6137	0.0012751	0.0017297	0.46102
1	41756416	rs12024413	A	G	0.7799	8.255	1.52e-16	???+????+-++-++-?+-??--?++?++---+++-?++++----+-++-?--?-++---+????++++-+?++++	0.01624	31.0336	278163	2.441	0.01465	0.7879	0	-1.477	0.1397	0.03692	36.9327	8.121	4.618e-16	0.8453	0	0.8453	0	-0.0012582	0.0017297	0.466971
1	41756906	rs12025254	A	G	0.7799	8.253	1.546e-16	++-++-+++--++-+++---+--+++++---+-+--++-++++--++---+---++++-++-++----++-++-++	0.06105	20.8819	300486	3.814	0.0001368	0.6067	0	-0.158	0.8744	0.04093	32.9249	6.717	1.853e-11	0.1135	49.6729	0.1135	49.6729	-0.0012718	0.0017297	0.462147
1	41764437	rs12027990	T	C	0.7796	8.248	1.614e-16	+-+--++-+++-+++-++-++++++-?+--++-++-++++++-+-++-+-++++-+-+---+-+-++-++-?++++	0.7135	0	297744	4.202	2.643e-05	0.3782	5.13949	2.341	0.01924	0.9187	0	5.428	5.685e-08	0.1386	45.4645	0.1386	45.4645	-0.0011874	0.0017299	0.492459
4	106217349	rs2647239	A	G	0.5739	8.248	1.615e-16	+++-+--+++++-+-+-+++++--++-++++-+++--+-++++-+++---++++-+--++-+++----+--++-++	0.469	0.378561	300486	4.025	5.691e-05	0.8027	0	3.466	0.0005292	0.1892	18.0283	4.44	8.983e-06	0.2814	21.5071	0.2814	21.5071	0.0063685	0.0017385	0.000249172
1	41758446	rs12749636	A	G	0.7799	8.247	1.625e-16	???--???++++++-+--++++--++?+-+--+++-?++++++++++---?+++-+???+-????--+++--+--+	0.5842	0	276693	4.852	1.221e-06	0.4462	1.11248	2.834	0.004594	0.7078	0	4.613	3.961e-06	0.2382	28.9941	0.2382	28.9941	-0.0012603	0.0017297	0.466219
1	41756677	rs34027267	T	C	0.78	8.244	1.662e-16	+++--+-+--++----+-++--++------+-+--++-+-+--+-+---+-+-+++---------++---++----	0.6671	0	300486	-4.856	1.199e-06	0.921	0	0.903	0.3666	0.6246	0	-5.105	3.31e-07	0.1561	42.5837	0.1561	42.5837	-0.0012187	0.0017297	0.481061
1	41775429	rs72665696	T	G	0.2204	-8.244	1.664e-16	++--+-+-+++--+-+-+++-----+--+++++--+--++--++--+++++-+++----+-+--+-++--++----	0.4225	2.26994	300486	-3.035	0.002408	0.3491	6.69683	0.915	0.3602	0.7937	0	-5.541	3.007e-08	0.5868	0	0.5868	0	0.001142	0.0017287	0.508862
3	49712297	rs11130213	T	C	0.2909	8.244	1.671e-16	++++++--++--+++-++++++-++-++++-++++++++-+-++-+-+-++-++--+++-++-++---+++-++-+	0.1401	15.0402	300486	5.387	7.177e-08	0.03044	31.4529	0.635	0.5253	0.7278	0	5.793	6.921e-09	0.6293	0	0.6293	0	0.0045526	0.0017411	0.00892689
1	41756298	rs12027685	A	G	0.22	-8.244	1.672e-16	-+-+++--?-++---+++++---+-----+-+---+--+--+--+-+++++-+---++++--+-+-++---+----	0.5598	0	291414	-5.364	8.159e-08	0.6996	0	-0.15	0.8805	0.3826	5.29705	-5.398	6.74e-08	0.9117	0	0.9117	0	0.0012255	0.0017297	0.478619
1	41757040	rs12723893	T	C	0.22	-8.243	1.681e-16	???--???++++++?+--++++--++?+-+--+++-?+-++++++++---?+++-+???+-????---++--+-++	0.6485	0	274440	4.904	9.408e-07	0.5003	0	2.795	0.005186	0.7489	0	4.604	4.151e-06	0.2492	27.1137	0.2492	27.1137	0.0012313	0.0017297	0.476563
1	41753165	rs12029950	A	G	0.22	-8.242	1.696e-16	???-????-+--+--+?-+??++?--?--+++---+?----++++----+?++?+--+++-????----+-?----	0.01208	32.3601	278163	-2.352	0.01868	0.7607	0	1.444	0.1486	0.03001	38.389	-8.168	3.14e-16	0.8846	0	0.8846	0	0.0012585	0.0017297	0.466874
1	41763028	rs12031417	A	G	0.7798	8.24	1.718e-16	-+++?+++++-+-++-?+-??--?++-++---++--+++++----+-++-+--?-++-+-+++++++-+-+?++++	0.02233	27.1761	297876	3.124	0.001783	0.3104	8.84645	-1.47	0.1416	0.1793	20.7771	7.702	1.335e-14	0.6312	0	0.6312	0	-0.0012486	0.0017297	0.470392
6	26949672	rs34816374	A	G	0.8982	-8.24	1.724e-16	+++--+-+-+---+----++--++------+-+--+--+----+-+---+-+-+++---------++---++----	0.6686	0	300486	-4.365	1.274e-05	0.9553	0	0.786	0.4317	0.4968	0	-5.384	7.303e-08	0.1176	48.9796	0.1176	48.9796	0.0038737	0.0017492	0.0267917
1	41762935	rs12032162	T	C	0.7798	8.239	1.734e-16	+---+-----+-+--+?-+??++?--+---++--++------+++-+--+-++?+--+++-------+---?----	0.04684	23.1891	297982	-3.206	0.001347	0.3514	6.56607	1.326	0.1849	0.2525	14.8332	-7.586	3.307e-14	0.6234	0	0.6234	0	-0.0012486	0.0017297	0.470392
1	41774212	rs55929643	A	G	0.7787	8.238	1.748e-16	+++++-+++--++++++++--+-+++-++--+++-++++++-++--+----+++-++++-+-++--+---+++-++	0.8052	0	300486	4.617	3.895e-06	0.7473	0	-0.594	0.5525	0.9227	0	4.686	2.791e-06	0.2383	28.9773	0.2383	28.9773	-0.0011446	0.0017299	0.508171
3	49714225	rs1131095	T	C	0.709	-8.238	1.751e-16	+++++-+++-+++++-+-++-+--+-++++-+-+---+-++-+-++-+--++++-+-+---++-++--+-++++++	0.0606	20.9269	300486	3.95	7.812e-05	0.36	6.09667	-0.079	0.9369	0.2716	12.3653	6.938	3.966e-12	0.01274	72.271	0.01274	72.271	-0.0045628	0.0017412	0.00877809
1	41757718	rs1343776	A	G	0.22	-8.238	1.754e-16	???--???++++++?+-?++++--++?+-+--+++-?++++++++++---?+++-+???+-????---++--+--+	0.5842	0	272923	4.981	6.319e-07	0.4301	2.2396	2.837	0.004554	0.754	0	4.459	8.216e-06	0.2398	28.7072	0.2398	28.7072	0.0012602	0.0017297	0.466273
1	41775589	rs72665698	T	G	0.7782	8.238	1.757e-16	---++------+++-+--+---++-++-+++----+-----++-+-+-+--++------+++++-+++-+------	0.06878	20.1491	300486	-4.085	4.404e-05	0.1415	19.3955	1.025	0.3052	0.2714	12.3806	-4.746	2.07e-06	0.5501	0	0.5501	0	-0.001079	0.0017298	0.532795
1	41760001	rs12740093	T	C	0.22	-8.236	1.777e-16	???--???++++++-+--++++--++?+-+--+++-?++++++++++---?+++-+???+-????--+++--+--+	0.5972	0	276693	4.859	1.177e-06	0.4433	1.3239	2.813	0.004916	0.7207	0	4.617	3.893e-06	0.2506	26.8828	0.2506	26.8828	0.0012236	0.0017297	0.479314
1	41760317	rs12038924	T	C	0.22	-8.234	1.813e-16	-+?+++-++-+++++++--+----++??++-+-++--+-++++-++----?+++++++++-???+-+-++-+++++	0.06521	21.3209	283864	4.478	7.527e-06	0.3581	6.62932	1.026	0.305	0.04559	32.1513	5.72	1.066e-08	0.1472	44.0403	0.1472	44.0403	0.0012236	0.0017297	0.479314
1	41760207	rs12038894	T	C	0.22	-8.234	1.814e-16	+++++++++--+--+-+-++-+-++-++++++++-+-+-++-++++-+-++++++--+---++++---+-++++++	0.007202	30.7255	300486	2.654	0.007947	0.6896	0	0.554	0.5798	0.001289	48.9648	7.34	2.135e-13	0.1414	45.0046	0.1414	45.0046	0.0012296	0.0017297	0.477156
1	41757015	rs12722758	A	G	0.2202	-8.233	1.826e-16	???++???------?-++----++--?-+-++---+?-+--------+++?---+-???-+????+++--++-+--	0.6635	0	274440	-4.896	9.767e-07	0.4985	0	-2.818	0.004832	0.7676	0	-4.6	4.223e-06	0.2556	26.0173	0.2556	26.0173	0.001231	0.0017297	0.476639
1	41775245	rs72665691	A	T	0.2208	-8.233	1.826e-16	--++---+---++--++++---++-+---+-----+--+++-+---++++-+++------+-+++-++--+-----	0.09367	18.1017	300486	-3.914	9.077e-05	0.08418	24.2869	-1.406	0.1599	0.1845	18.3718	-3.933	8.38e-05	0.6704	0	0.6704	0	0.0011391	0.0017298	0.510223
1	41759891	rs12739950	T	C	0.2196	-8.233	1.832e-16	???+????+-++-++-?+-??--?++?-+---+++-?++++----+-++-??-?-+???-+????++-+-+?++++	0.0119	33.3429	272529	2.655	0.007931	0.5069	0	-1.633	0.1024	0.08374	29.9805	7.82	5.303e-15	0.7483	0	0.7483	0	0.0011468	0.0017298	0.507329
1	41760562	rs12032514	A	G	0.22	-8.232	1.84e-16	++-++-+++--++-+++---+--+++++---+-+--++-++++--++---+---++++-++-++----++-++-++	0.05542	21.4569	300486	3.779	0.0001574	0.5718	0	-0.105	0.9162	0.0393	33.2087	6.716	1.862e-11	0.1166	49.1525	0.1166	49.1525	0.0012236	0.0017297	0.479314
3	49705512	rs9823546	A	T	0.2908	8.232	1.84e-16	+++-+-+-+-+++-+++--+--++++++++-+-+---+-+-------+--+-+++++----+++++--++++++++	0.02784	25.1123	300486	2.778	0.005476	0.3115	8.78409	-0.734	0.4632	0.05305	31.0139	5.392	6.96e-08	0.1421	44.8732	0.1421	44.8732	0.0045742	0.0017406	0.00859014
1	41760860	rs12039767	T	C	0.2201	-8.227	1.921e-16	-+++-+++++-+-++-?+-??--?++-+++--++--++++++---+-++-+--?-++---+++++++-+++?++++	0.04896	22.9334	297982	3.21	0.001326	0.3582	6.19357	-1.37	0.1706	0.2672	13.7652	7.579	3.475e-14	0.6322	0	0.6322	0	0.0012479	0.0017297	0.47062
1	41761737	rs12040690	C	G	0.7806	8.226	1.934e-16	???--???++++++++--++++--++?+-+--+++-?+-++++++++---?+++-+???+-????---++--+-++	0.634	0	276693	4.852	1.224e-06	0.4693	0	2.843	0.004473	0.7463	0	4.756	1.97e-06	0.2293	30.4912	0.2293	30.4912	-0.0012486	0.0017297	0.470392
1	41775236	rs72665690	C	G	0.7792	8.225	1.951e-16	+---++-+---+-+-+--+++-++--------+-+-+--+++------++-++-+--+---+---++----+----	0.536	0	300486	-4.143	3.421e-05	0.4188	2.86075	-1.102	0.2702	0.436	1.91591	-3.869	0.0001094	0.9303	0	0.9303	0	-0.0011391	0.0017298	0.510223
1	41763955	rs12037588	C	G	0.7797	8.223	1.978e-16	+++++++++-----+-+-++-+-++-++++++++-+-+-++-++++-+-++++++--+---++++---+-++++++	0.007829	30.4222	300486	2.651	0.008023	0.7196	0	0.655	0.5125	0.001058	49.5798	7.307	2.741e-13	0.1449	44.4239	0.1449	44.4239	-0.0012555	0.0017297	0.467918
1	41763891	rs12037560	A	C	0.2203	-8.223	1.99e-16	???-????-+--+--+?-+??++?--?--+++---+?----++++-+--+?++?+--+++-????----+-?----	0.01125	32.6674	278163	-2.346	0.01897	0.7799	0	1.473	0.1408	0.02705	39.0825	-8.167	3.15e-16	0.8551	0	0.8551	0	0.0012647	0.0017297	0.464697
3	49701983	rs9858542	A	G	0.2909	8.221	2.011e-16	---------++-++-+-+-++---++----------+++--+-+-++-+++----++-++++---+++-+------	0.07318	19.7552	300486	-1.68	0.09302	0.5338	0	-0.186	0.8522	0.04511	32.2279	-5.897	3.696e-09	0.4153	0	0.4153	0	0.0046467	0.0017407	0.00759976
1	41766074	rs35812095	T	C	0.7795	8.216	2.101e-16	-++---++-+--+-+++----++-++++++-+++---++++0+++++++-+----++-+++-+-++--+++-++-+	0.7872	0	300486	5.068	4.011e-07	0.5078	0	0.095	0.924	0.9134	0	4.408	1.046e-05	0.8257	0	0.8257	0	-0.0012287	0.0017298	0.477518
6	26927602	rs80264589	A	G	0.1019	8.215	2.128e-16	----+-+-+---+--+?-+?--++-+----+++-++--++---+--+-----++++------+-+-+---++----	0.7772	0	300311	-3.548	0.0003876	0.7443	0	-0.358	0.7204	0.6833	0	-4.458	8.255e-06	0.2566	25.8527	0.2566	25.8527	-0.0038839	0.0017492	0.0263937
1	41769334	rs12032215	A	G	0.7795	8.214	2.137e-16	---++-+-++-++-++++--++--++++++-++++-+++++-+-+-+++-+++---++++++++---++++-++++	0.7727	0	300486	5.588	2.296e-08	0.8214	0	-0.236	0.8136	0.808	0	5.326	1.003e-07	0.3178	14.8453	0.3178	14.8453	-0.0011983	0.0017298	0.488484
1	41776403	rs12751511	A	T	0.7797	8.214	2.139e-16	+----++-+++-+++-++-++++++-++--+++++-++++++-+-++-+-++++-+-+---+-+-++-++-?++++	0.7664	0	300310	4.259	2.051e-05	0.4154	3.05146	2.128	0.03334	0.9212	0	5.289	1.233e-07	0.202	35.0368	0.202	35.0368	-0.001152	0.0017287	0.50515
1	41775379	rs72665692	A	G	0.7782	8.213	2.152e-16	???++-??-+-+-+??-?---++---??-+-----+?-+-++-++-++-+?--------??????+++--------	0.7608	0	271263	-2.574	0.01004	0.8823	0	0.276	0.7823	0.564	0	-5.582	2.372e-08	0.809	0	0.809	0	-0.0011353	0.0017299	0.511635
1	41771793	rs61477144	A	G	0.7794	8.213	2.163e-16	???+-???++++-++-?+-??---++?+---+++--?-+-+----++++-?+-?--???++????++++-+?++++	0.005685	35.6223	274336	2.991	0.002783	0.03075	37.6721	-1.703	0.0886	0.2026	18.298	6.131	8.723e-10	0.8724	0	0.8724	0	-0.0011744	0.0017298	0.497199
1	41775384	rs72665694	A	G	0.7783	8.212	2.174e-16	+-++++-++-+-----+++--++---+---+----+-----+--+--+-+------++++--+--+-----+----	0.3953	3.37044	300486	-1.994	0.0461	0.8767	0	-1.513	0.1303	0.05551	30.6599	-5.421	5.92e-08	0.7843	0	0.7843	0	-0.0011353	0.0017299	0.511635
1	41765944	rs34961305	A	G	0.7795	8.211	2.187e-16	--+-++-+--+-+--++++--+--++++++-+++-+-+-+++++-++-++++-+++--++-+++--+-+-+-+--+	0.4408	1.52699	300486	2.939	0.003298	0.6125	0	1.871	0.06128	0.2699	12.4752	5.466	4.605e-08	0.2841	21.0111	0.2841	21.0111	-0.0012287	0.0017298	0.477518
1	41769045	rs34796305	A	G	0.7795	8.211	2.189e-16	-++---++-+--+-+++----+--++++++-+++---++++-+++++++-+----++-+++-+-++--+++-++-+	0.7652	0	300486	5.209	1.898e-07	0.4739	0	0.138	0.8904	0.9092	0	4.35	1.36e-05	0.9101	0	0.9101	0	-0.0012092	0.0017298	0.484518
1	41770718	rs56381773	T	C	0.7795	8.211	2.198e-16	???++???-+?++??++++--?+-+-?++?+---+-?+++-+++-+-+--??++++???++????-+-+--+++++	0.05949	24.2056	269656	2.976	0.002925	0.01112	45.5182	2.676	0.007445	0.3696	6.31831	4.612	3.993e-06	0.6412	0	0.6412	0	-0.0011855	0.0017298	0.493106
1	41767022	rs35529558	A	G	0.7794	8.21	2.206e-16	???++???++++?--?+?+-+--+-+??+-+?++?+?+-+?-++----+-?++++++++??????---++++++++	0.2353	11.7549	269472	1.576	0.1151	0.917	0	-0.282	0.7777	0.2883	11.282	7.101	1.239e-12	0.3582	6.97674	0.3582	6.97674	-0.0012287	0.0017298	0.477507
1	41770083	rs2364533	C	G	0.7795	8.209	2.228e-16	???++++?-----?+-++---+++--?-+-++---+?----------+++----+-???-+???-++---++-+--	0.6596	0	277116	-4.44	8.978e-06	0.5173	0	-2.764	0.005717	0.71	0	-4.55	5.375e-06	0.2587	25.4844	0.2587	25.4844	-0.0011738	0.0017298	0.497393
1	41777990	rs12036555	T	C	0.7804	8.209	2.23e-16	+-+-+++-+++-+++-++-++++++-++--+++++-++++++-+-++-+-++++-+-+---+-+-++-++-?++++	0.8119	0	300310	4.233	2.304e-05	0.4587	0.64827	2.336	0.01951	0.9507	0	5.393	6.923e-08	0.1611	41.7589	0.1611	41.7589	-0.001064	0.0017298	0.538481
1	41774350	rs34759578	A	G	0.2207	-8.208	2.258e-16	???++???++?+-?+-?+-?----+-?+-----+--?++-+----+-++-?--?-0???-+????++-+-+?++++	0.009806	33.7019	272263	2.239	0.02518	0.3256	9.765	-1.418	0.1562	0.04831	33.8747	7.106	1.196e-12	0.9915	0	0.9915	0	0.0011418	0.0017298	0.509225
1	41771744	rs60825180	A	G	0.7794	8.208	2.258e-16	+-+---++?+--+++-+-+++---++-+++--++---++-+----+--++-+-+++---+---++---+--+++-+	0.01388	28.3536	291414	2.754	0.005891	0.1902	16.1759	-0.344	0.7306	0.0599	30.0553	5.89	3.858e-09	0.07024	57.4649	0.07024	57.4649	-0.0011743	0.0017298	0.497233
1	41765879	rs34190295	T	C	0.7795	8.207	2.265e-16	--+++-++--+-----+-+---++-+----+---++--++--++--+++-+----+-+--++---+-+---+--+-	0.5346	0	300486	-4.713	2.443e-06	0.4918	0	0.21	0.8339	0.8878	0	-4.928	8.287e-07	0.0549	60.5575	0.0549	60.5575	-0.001226	0.0017298	0.478487
1	41772167	rs7513682	T	C	0.7794	8.207	2.267e-16	+-+--+--+-+--++-------+-+++--+-+-+--++-+-++++++++-?--+-++++--+-+--+--+-+++++	0.08063	19.2307	300049	0.511	0.6096	0.466	0.22258	1.903	0.057	0.1825	18.5181	6.385	1.71e-10	0.4139	0	0.4139	0	-0.0011443	0.0017298	0.508288
1	41771230	rs56096486	A	C	0.7795	8.207	2.268e-16	---+++---++------++--++++-+--+++-+-+--++------++-+-+-----------+-+++---+----	0.5729	0	300486	-2.63	0.008529	0.4383	1.78264	0.351	0.7252	0.839	0	-6.153	7.582e-10	0.8283	0	0.8283	0	-0.001185	0.0017298	0.493299
1	41773942	rs56077539	T	C	0.7793	8.207	2.271e-16	+++---+++--++++++--++----+-++---+-+-++--++++++--+-+-+++++++++++-+---+++-++++	0.5791	0	300486	2.639	0.008324	0.4514	1.05378	-0.356	0.7218	0.8317	0	6.15	7.759e-10	0.8451	0	0.8451	0	-0.0011507	0.0017298	0.505906
3	49702484	rs9882740	T	C	0.7085	-8.207	2.273e-16	+-+-----++-++-++++-+-----++-++++-++-++-+-+---++--+---++--+--+++-++++-+++++++	0.1363	15.2715	300486	1.064	0.2875	0.3119	8.75912	0.968	0.3332	0.2445	14.1606	6.079	1.21e-09	0.908	0	0.908	0	-0.0044764	0.0017408	0.0101251
1	41771683	rs57529969	A	G	0.2206	-8.206	2.281e-16	-+-++-----++----+--+++++-+-++-+--++-----+--+----+-----+--++-+--++-+------+--	0.5406	0	300486	-3.791	0.00015	0.6135	0	-2.034	0.04197	0.372	5.9679	-4.238	2.257e-05	0.2434	28.1093	0.2434	28.1093	0.0011656	0.0017298	0.500426
1	41770620	rs68132196	A	C	0.2206	-8.204	2.317e-16	+-+++++++++-+++++-++---++---++-++++++++-++++-+-+-++-++--++---+-+--+-+++-+-++	0.1924	12.2119	300486	4.531	5.863e-06	0.07515	25.2183	0.925	0.3551	0.6283	0	3.719	0.0001999	0.4054	0	0.4054	0	0.0011881	0.0017298	0.492164
1	41773182	rs34008156	T	G	0.2207	-8.203	2.342e-16	+-+-+------++--+?-+--+++--+---+-+-+++-+--++++-+-----+?+-+++++---+-++---?----	0.2446	9.89864	298327	-2.967	0.003003	0.5316	0	0.795	0.4266	0.3307	8.89766	-6.525	6.814e-11	0.7502	0	0.7502	0	0.0011497	0.0017298	0.506291
1	41777989	rs12036554	T	G	0.7813	8.202	2.364e-16	-+++-+++++-+-++-?+-??--?++-+++--++--++++++---+-++-+--?-++---+++++++-+++?++++	0.04871	22.9627	297982	3.207	0.001342	0.3576	6.22656	-1.334	0.1822	0.2566	14.539	7.579	3.47e-14	0.6316	0	0.6316	0	-0.0010639	0.0017298	0.53853
1	41770055	rs2364534	A	G	0.7796	8.2	2.407e-16	???----?+++++?-+--+++---++?+-+--+++-?++++++++++---++++-+???+-???+--+++--+--+	0.7014	0	277116	4.412	1.025e-05	0.5715	0	2.796	0.005173	0.719	0	4.557	5.19e-06	0.266	24.2041	0.266	24.2041	-0.001174	0.0017298	0.497325
6	26946687	rs35869525	T	C	0.102	8.199	2.424e-16	---++++-+--+++++-+-+-------+++-++++++++-++--+-+--++-++-+-++-+-++++--+-+-++-+	0.2259	10.5887	300486	1.982	0.04749	0.5352	0	0.745	0.4565	0.2595	13.1593	6.612	3.802e-11	0.4204	0	0.4204	0	-0.0038771	0.0017492	0.0266563
1	41768653	rs34862272	A	C	0.7794	8.197	2.454e-16	???+-???++++-?+-?+-??---++?+---++++-?-+-+----+++--?+-?--???-+????++-+-+?++++	0.01283	32.5434	273057	2.755	0.005864	0.04936	34.7129	-0.804	0.4212	0.1639	21.3861	6.529	6.638e-11	0.6696	0	0.6696	0	-0.0012277	0.0017298	0.477859
1	41772126	rs7521544	A	G	0.2206	-8.197	2.468e-16	+-++-+-+++--+++--+++-+--++++++++-+-+-+-+---+++-++-+--+-+-+-++-+++--+++++++++	0.7583	0	300486	3.123	0.001789	0.475	0	0.853	0.3939	0.7422	0	4.716	2.4e-06	0.8865	0	0.8865	0	0.0011584	0.0017298	0.503083
6	26593275	rs35400317	T	C	0.0978	8.196	2.487e-16	---++-+-+-+++-++++--++--++++++-+-++-++-++++-+-+++-+-+---+++++++++--+++--++++	0.6709	0	300486	4.302	1.693e-05	0.9553	0	-0.781	0.4348	0.4951	0	5.383	7.337e-08	0.1179	48.9188	0.1179	48.9188	-0.0040686	0.0017392	0.0193241
1	41773502	rs12744310	T	C	0.2207	-8.195	2.497e-16	???--???++++++-+--++++--++?+-+--+++-?+-++++++++---?+++-+???+-????--+++--+--+	0.5692	0	276693	4.82	1.436e-06	0.4033	4.17632	2.858	0.004265	0.7241	0	4.627	3.709e-06	0.2369	29.2119	0.2369	29.2119	0.0011485	0.0017298	0.506722
6	26935379	rs35173303	T	C	0.1005	8.194	2.524e-16	-----+----+-+--+-+-+-++-----+++----+--+--+-++--+++?+++---+--++--++---++--+--	0.009172	29.9892	300049	-3.921	8.823e-05	0.1416	19.5893	-0.334	0.7382	0.01048	40.8261	-5.268	1.381e-07	0.2733	22.9386	0.2733	22.9386	-0.0038817	0.0017492	0.0264728
1	41772442	rs12038386	A	G	0.2204	-8.192	2.562e-16	+---+--+-+--++-+-++++-+-+-+---++++--++++++---+++--++++++-+--+-++---++++-+--+	0.000795	37.3533	300486	4.287	1.809e-05	0.006716	38.9089	0.845	0.3978	0.1352	22.2617	5.925	3.116e-09	0.003229	78.2198	0.003229	78.2198	0.0011107	0.0017297	0.520799
3	49721798	rs13085791	A	C	0.2912	8.19	2.61e-16	???++???--------++----++--?-+-++---+?-+--------+++?---+-???-+????+++--++-+--	0.631	0	276693	-4.87	1.117e-06	0.4615	0.00416649	-2.804	0.005054	0.7468	0	-4.587	4.492e-06	0.2633	24.6799	0.2633	24.6799	0.0045988	0.0017418	0.00828705
1	41766236	rs2364535	A	G	0.2206	-8.188	2.662e-16	???----?+++++?-+--+++---++?+-+--+++-?++++++++++---++++-+???+-???+--+++--+-++	0.6985	0	277116	4.419	9.894e-06	0.5603	0	2.824	0.004747	0.732	0	4.541	5.606e-06	0.2574	25.7058	0.2574	25.7058	0.0012287	0.0017298	0.477518
1	41759499	rs60552457	A	C	0.2203	-8.188	2.666e-16	-+++--++-+-++--+-++++--+---++---+-++--+--------+-+?++-++--+++-+-++-++-+-----	0.04447	22.8282	300049	-1.41	0.1586	0.2107	14.8472	-1.641	0.1008	0.1404	21.8241	-6.242	4.327e-10	0.2659	24.2233	0.2659	24.2233	0.0012294	0.0017297	0.477221
1	41772971	rs56409354	A	G	0.2207	-8.187	2.685e-16	??+-+--++++++?-+--+++++-++??-+--+++-?+-++++--+----++++-+???+--+-----++-++-++	0.7537	0	284893	3.72	0.0001993	0.655	0	1.971	0.04872	0.6026	0	4.341	1.421e-05	0.4119	0	0.4119	0	0.0011451	0.0017298	0.507972
6	26942146	rs66975207	A	C	0.9009	-8.184	2.744e-16	-+--+-+-++-++--+---+++------------+-+-+-------+-----+-+----+--++++-++-------	0.1771	12.9961	300486	-2.216	0.02668	0.2963	9.63923	-2.094	0.03627	0.2082	16.6551	-5.147	2.652e-07	0.3097	16.3647	0.3097	16.3647	0.0038028	0.0017417	0.0290068
1	41772417	rs7556585	A	G	0.7796	8.179	2.865e-16	-+-+---++---+++-----++-+---++---+---+-+----+-+++---------++-++-+++-+--++----	0.8137	0	300486	-1.596	0.1105	0.964	0	-0.997	0.319	0.4087	3.64851	-5.87	4.365e-09	0.7764	0	0.7764	0	-0.0011267	0.0017297	0.514814
1	41769337	rs12035353	A	G	0.2205	-8.176	2.93e-16	-+++?++++-++-++-?+-??--?++-++---++--+++++----+-++-+++?-++---++++-++-+++?++++	0.03661	24.693	297876	3.153	0.001614	0.3033	9.2456	-1.268	0.205	0.2352	16.3697	7.6	2.97e-14	0.5984	0	0.5984	0	0.0011392	0.0017298	0.510152
6	27054772	rs67092078	A	G	0.0991	8.176	2.938e-16	+++-+-+++--+++++++-----+++-++--+++-+++-++---+++-----++-+-++++-++--++++++++-+	0.6997	0	300486	4.766	1.881e-06	0.4612	0.509887	-0.477	0.6337	0.9303	0	4.117	3.835e-05	0.57	0	0.57	0	-0.0036041	0.0017409	0.0384326
3	49719729	rs9822268	A	G	0.2914	8.176	2.943e-16	++-+-+--++++-+--+-----++--+--++-+-++-+----+--++++++++-----+-+-++++++--------	0.02957	24.8188	300486	-1.597	0.1103	0.07224	25.5343	0.487	0.6262	0.3845	5.18331	-6.237	4.448e-10	0.4447	0	0.4447	0	0.0046808	0.0017419	0.00720775
4	102926923	rs34592089	A	G	0.0606	-8.166	3.178e-16	+---+++++-++-+++------+--++?-+-+-+-+-+-+++++-+++-++-++-+++--++--+-++-+-+++++	0.0445	22.825	296137	0.508	0.6117	0.1894	16.2281	2.91	0.003619	0.4263	2.53411	6.974	3.091e-12	0.5194	0	0.5194	0	0.0020259	0.0017134	0.237055
6	98540145	rs79690157	A	G	0.1348	8.161	3.317e-16	???+-???++++-?+-?+-??---+-?+---+++--?-+-+----++++-??-?--???++????+++--+?++++	0.004695	36.8158	271503	2.418	0.01561	0.0564	34.1416	-1.519	0.1287	0.08028	29.4881	5.965	2.44e-09	0.8899	0	0.8899	0	9.6907e-05	0.0017122	0.954867
1	41769218	rs12032191	A	G	0.7797	8.16	3.36e-16	-+-++---?-++---+++++---+-----+-+---+--+--+--+-++++--+----+-+--+-+-++---+----	0.5281	0	291414	-5.326	1.002e-07	0.6841	0	-0.135	0.8927	0.371	6.02976	-5.427	5.717e-08	0.8227	0	0.8227	0	-0.001192	0.0017299	0.490772
1	41769146	rs35972058	A	G	0.2192	-8.132	4.213e-16	-++++--+---++--+--++-+---+--+++-+--+-----++-+-+--+----+-+-+-+++-+--+--+?----	0.5189	0	300310	-3.704	0.0002122	0.2599	11.729	-1.06	0.289	0.7212	0	-5.11	3.228e-07	0.4696	0	0.4696	0	0.0013243	0.0017298	0.443936
6	26599509	rs45527431	A	G	0.9026	-8.123	4.558e-16	+-+--+-+-++-----++++--++------+-+--++-+-+--+-+---+-+-+++---------++----+----	0.6401	0	300486	-4.668	3.035e-06	0.8589	0	0.938	0.3481	0.6376	0	-4.957	7.149e-07	0.2466	27.5537	0.2466	27.5537	0.0041301	0.0017373	0.0174421
1	41769158	rs12032906	T	C	0.7807	8.12	4.673e-16	-----+---++-++-+-+--+-+--+--------+-+-+--+----+-+------++-+++----+++-+------	0.007202	30.7255	300486	-2.625	0.008662	0.6882	0	-0.622	0.5337	0.001588	48.2946	-7.351	1.961e-13	0.09993	52.023	0.09993	52.023	-0.0012793	0.0017298	0.459589
16	28828834	rs62036618	A	C	0.6192	8.114	4.879e-16	-----+--+++---+---+-+---+----++-++----+++-+--+-+---+++-+-+--+++----+------+-	0.09294	18.1562	300486	-0.844	0.3986	0.3696	5.56461	-0.084	0.9332	0.5598	0	-7.231	4.788e-13	0.3481	9.00819	0.3481	9.00819	0.0014578	0.0017377	0.401486
1	41764471	rs12028010	T	C	0.7709	8.113	4.931e-16	-+++-+++++-+-++-?+-??--?++-+++--++--++++++---+-++-+--?-++---+++++++-+++?++++	0.04772	23.0812	297982	3.197	0.001387	0.3626	5.95316	-1.321	0.1865	0.2481	15.1554	7.595	3.082e-14	0.6189	0	0.6189	0	-0.00086772	0.0017296	0.615886
6	26498758	rs72843784	T	G	0.0975	8.106	5.231e-16	-----------------+--+++--+++--+-+-----++----+-+-+--+--++--+++-+--+-+---+-+--	0.1519	14.3611	300486	-4.372	1.234e-05	0.04898	28.4039	-0.912	0.3618	0.619	0	-3.748	0.0001786	0.4163	0	0.4163	0	-0.004572	0.0017371	0.0084879
4	106120756	rs11726786	T	G	0.6426	8.105	5.281e-16	+++++-+++-----+-+-++-+-++-++++++++-+-+-++-++++-+-+-+++---+---++++---+-++++++	0.007724	30.4719	300486	2.631	0.008523	0.6967	0	0.624	0.5328	0.001583	48.3053	7.481	7.397e-14	0.1351	46.0432	0.1351	46.0432	0.0079255	0.0017352	4.93742e-06
1	41769172	rs34315814	T	C	0.7806	8.095	5.725e-16	-+++-----+--+---++++++-++--?+-+-+-+-+-+-----+---+--+--+---++--++-+--+-+-----	0.04484	22.7823	296137	-0.511	0.6096	0.1887	16.2713	-2.901	0.003717	0.4304	2.27376	-6.999	2.582e-12	0.5325	0	0.5325	0	-0.0012703	0.0017299	0.462754
3	49721532	rs3197999	A	G	0.2842	8.09	5.99e-16	???-+-+?----+--???+?-+++--??--+---++?+----+++-+--+?-+?+-+++?????-++----?----	0.07536	22.0512	272169	-3.06	0.002214	0.4163	3.23954	1.001	0.3166	0.1211	24.8012	-6.472	9.644e-11	0.8304	0	0.8304	0	0.0043209	0.0017408	0.0130587
6	26633711	rs67777156	A	T	0.098	8.088	6.067e-16	-+--+-+--------++++++?---+-+-+++----+------+++---++-+--+--+-+--+++++--+-----	0.02346	26.0592	300394	-5.24	1.603e-07	0.003644	41.281	-0.721	0.4708	0.6483	0	-3.246	0.001171	0.7827	0	0.7827	0	-0.0039386	0.0017393	0.0235505
6	26651053	rs13201782	A	T	0.0981	8.086	6.177e-16	???++???------?-++----++--?-+-++---+?-+--------+++?---+-???-+????+++--++-++-	0.6386	0	274440	-4.911	9.082e-07	0.4739	0	-2.842	0.004481	0.765	0	-4.537	5.707e-06	0.2528	26.4886	0.2528	26.4886	-0.0039854	0.0017392	0.0219381
4	106216667	rs2101975	A	G	0.5652	8.082	6.356e-16	???++++?-----?+-++---+-+--?-+-++---+?----------+++?---+-???-+???-++---++-+--	0.6861	0	276679	-4.388	1.142e-05	0.5508	0	-2.844	0.004453	0.7009	0	-4.632	3.627e-06	0.2885	20.234	0.2885	20.234	0.0063187	0.0017517	0.000309671
4	106125309	rs11721948	T	C	0.3578	-8.08	6.477e-16	++++--+-+++++--++--++----+++++++++++++-+++-+++++++--+-+-+++--++++-++++-+++++	0.7383	0	300486	4.567	4.936e-06	0.8205	0	2.31	0.0209	0.3901	4.82837	5.278	1.309e-07	0.329	12.7146	0.329	12.7146	-0.0079139	0.0017346	5.05825e-06
16	28824685	rs62036614	T	C	0.6127	8.064	7.369e-16	+-+++-+---+-+++--+-----+-+--++++--+--++-+-+----+------++-+--+-+++-++-+----+-	0.4942	0	300486	-2.762	0.005745	0.1883	16.132	-1.008	0.3133	0.8187	0	-5.342	9.186e-08	0.5818	0	0.5818	0	0.0013018	0.0017404	0.454444
16	28823097	rs62036613	A	G	0.6141	8.063	7.414e-16	+----++-+++--++-++--+-+++-++---+-++-+++++--+-++++-++++-+-+-+---+-++-++-?++++	0.4446	1.37541	300310	3.676	0.000237	0.2149	14.4348	0.883	0.3773	0.723	0	4.662	3.138e-06	0.3367	11.2163	0.3367	11.2163	0.0012838	0.0017402	0.460659
6	26631568	rs66488313	T	G	0.0976	8.058	7.726e-16	-+-+--++--+-++----+--++++----------+--+----+++-+-+++---++++-------+-+-------	0.2568	9.17788	300486	-1.543	0.1227	0.6433	0	-1.234	0.2174	0.1244	23.1912	-6.03	1.635e-09	0.8951	0	0.8951	0	-0.00403	0.0017375	0.0203704
6	98297832	rs1933720	T	C	0.6401	-8.037	9.169e-16	???--???++++++??-?++++--++?+-+--+++-?++++++++++---?+++-+????-????---++--+-++	0.669	0	271373	4.7	2.607e-06	0.4993	0	2.846	0.004432	0.7522	0	4.494	6.987e-06	0.294	19.2246	0.294	19.2246	-0.0018272	0.0017365	0.292691
4	106127121	rs34104813	T	C	0.3581	-8.034	9.411e-16	+++++++-+-+++-++++--++---+++++---++-++--+++-+-+-+-++----+++++++++--+++--++++	0.2196	10.8851	300486	4.042	5.309e-05	0.8357	0	-0.981	0.3264	0.09732	25.7463	5.773	7.766e-09	0.3484	8.95296	0.3484	8.95296	-0.0076322	0.0017339	1.07374e-05
6	26603811	rs9379900	A	C	0.8738	-8.013	1.116e-15	+-+??-++?-?--+++?-???????++++??+-+-?++?++?????????++????+-++++-++????+++++++	0.6778	0	251002	4.119	3.802e-05	0.6052	0	1.15	0.25	1	NA	3.806	0.000141	0.859	0	0.859	0	0.0037992	0.0017659	0.0314485
16	28896015	rs11642449	T	C	0.3489	-8.007	1.173e-15	++++--+-+++++--+++-++----+++++++++++++-+++-+++++++--+-+-+++-+++++-++++-+++++	0.5437	0	300486	4.312	1.62e-05	0.8662	0	2.504	0.01226	0.1186	23.7107	5.523	3.326e-08	0.3559	7.43598	0.3559	7.43598	-0.002094	0.0017341	0.227227
6	26478252	rs34104395	T	C	0.1087	8.005	1.19e-15	+++--+-+-+---+---+++--++------+-+--+--+----+-+---+---+++--------+++---++----	0.6312	0	300486	-4.096	4.198e-05	0.9069	0	0.475	0.6351	0.4589	0.438072	-5.533	3.149e-08	0.1513	43.3535	0.1513	43.3535	-0.0046892	0.0017413	0.00708435
6	26499185	rs13220261	T	C	0.1087	7.995	1.291e-15	???--???++++++-+--++++--++?+-+--+++-?++++++++++---?+++-+???+-????--+++--+--+	0.5732	0	276693	4.775	1.795e-06	0.4002	4.3939	2.844	0.004455	0.7219	0	4.613	3.976e-06	0.2508	26.8471	0.2508	26.8471	-0.0046968	0.0017413	0.00699037
4	103146890	rs35518360	A	T	0.9192	7.993	1.317e-15	+--++-+-+-+++-++++--++--++++++-+-++-++-++++-+-+++-+-+---+++++++++--+++--++++	0.6776	0	300486	4.295	1.744e-05	0.9604	0	-0.801	0.4232	0.4986	0	5.39	7.064e-08	0.1117	49.9917	0.1117	49.9917	-0.0024461	0.0017155	0.153904
6	26582035	rs13198716	T	C	0.0979	7.987	1.386e-15	+++++----++-++++++--+----++++-++--+-+++--+++-++-+--+-+++----+-++-+++++--++++	0.0006694	37.7846	300486	1.948	0.05139	0.03957	29.827	1.606	0.1083	0.00973	41.1822	7.293	3.031e-13	0.3662	5.36278	0.3662	5.36278	-0.0043827	0.0017389	0.0117247
16	28897452	rs8056890	A	G	0.3488	-7.984	1.422e-15	---+-----++++--+--+-++-+---++--+--++-+----------++--+-+++---+++++------+--+-	0.3513	5.16293	300486	-3.211	0.001324	0.3669	5.71819	-1.544	0.1225	0.5866	0	-4.259	2.057e-05	0.03016	66.4279	0.03016	66.4279	-0.0020382	0.001734	0.239828
6	26487169	rs6900665	T	C	0.1208	7.982	1.435e-15	--+++-+-++-+-+++--+++++++++--+-+-+++++-++--++-++--++-+++++-+---+-++--++-++++	0.2723	8.49418	300486	1.926	0.05413	0.1659	17.6429	0.257	0.7969	0.7217	0	6.047	1.475e-09	0.804	0	0.804	0	-0.0038189	0.0017651	0.030493
6	26593037	rs34781270	A	G	0.8915	-7.978	1.491e-15	+--+++-++-+++++-+-----+-+++--+++++--++-++++++++-+-?--+--++---+-++-++---+++++	0.1028	17.534	300049	1.321	0.1864	0.2582	11.948	2.301	0.02136	0.2987	10.6105	6.601	4.093e-11	0.5274	0	0.5274	0	0.0041935	0.0017419	0.0160657
4	106254606	rs2726478	A	T	0.4075	-7.974	1.541e-15	+++-+--+-+--+--+-++---++++++++++++--++-+++---+----+-+++++--+++-+----++--++++	0.1853	12.5691	300486	3.671	0.0002413	0.5107	0	0.727	0.4673	0.06017	30.0194	5.739	9.546e-09	0.6451	0	0.6451	0	-0.00509	0.0017368	0.00338143
6	26587373	rs13190739	T	G	0.1084	7.973	1.545e-15	???--???++++++++--++++--++?+-+--+++-?+-++++++++---?+++-+???+-????---++--+-++	0.6406	0	276693	4.922	8.566e-07	0.5025	0	2.852	0.00434	0.7527	0	4.521	6.14e-06	0.2353	29.4781	0.2353	29.4781	-0.0042187	0.0017418	0.0154383
6	26468326	rs3734542	A	G	0.109	7.967	1.625e-15	+++---+--++----+---+--+-------+----+-----+-+-+--+-++--++----+---++-+---+--+-	0.4807	0	300486	-4.498	6.868e-06	0.2347	13.2246	-0.108	0.9141	0.849	0	-4.837	1.318e-06	0.3735	3.84615	0.3735	3.84615	-0.0046791	0.0017414	0.00720941
16	28906084	rs9931989	C	G	0.652	7.966	1.643e-15	+-+-+-----+-++-++-----++-+--++-++-+-+-++---++--++++++--+--+-+------+---+--+-	0.2936	7.57628	300486	-4.127	3.674e-05	0.8431	0	1.018	0.3085	0.1597	20.2573	-4.404	1.062e-05	0.1909	36.8554	0.1909	36.8554	0.0019566	0.0017341	0.259197
4	103198082	rs13135092	A	G	0.9202	7.956	1.776e-15	???++???------?-+?----++--?-+-++---+?----------+++?---+-???-+????+++--++-++-	0.5944	0	272923	-4.977	6.463e-07	0.4343	1.93019	-2.884	0.003921	0.7586	0	-4.492	7.068e-06	0.2484	27.2551	0.2484	27.2551	-0.0028706	0.0017131	0.0937994
4	106256521	rs2647259	A	C	0.4086	-7.948	1.897e-15	---------+++++-+-+--+--+++--------+---+--+----+-+-?-----+-+++-----++-+------	0.001371	36.0912	300049	-2.454	0.01412	0.4905	0	-0.962	0.336	0.0006644	50.9499	-6.665	2.642e-11	0.0185	70.024	0.0185	70.024	-0.0054654	0.0017369	0.00165158
3	49722356	rs9837520	A	G	0.2736	7.944	1.962e-15	--++-++-++---+-+-+--++-++-+++---+++-++--++-++-++-++++-+++++----+---++++-++++	0.1523	14.3405	300486	3.766	0.0001657	0.321	8.25478	-0.013	0.9899	0.1798	18.719	4.317	1.581e-05	0.2464	27.5887	0.2464	27.5887	0.0047167	0.0017445	0.00685804
6	26851415	rs77666565	A	G	0.112	7.943	1.974e-15	++--+++-+++--++----+++--+-+++-+++++-++---+-+++----+---++++++-+---+--++-+++++	0.1298	15.665	300486	3.756	0.0001728	0.08768	23.9414	1.34	0.1803	0.2606	13.0888	3.949	7.864e-05	0.6817	0	0.6817	0	-0.0037886	0.0017462	0.03004
6	28089731	rs66886492	T	C	0.104	7.943	1.98e-15	---+++---++-------+++++---+--++---+------+++---++++---+-+----+--++-------++-	0.7239	0	300486	-4.935	8.01e-07	0.4867	0	0.537	0.5911	0.9588	0	-4.01	6.064e-05	0.4869	0	0.4869	0	-0.0036445	0.0017402	0.0362326
6	26603924	rs35076545	A	C	0.1085	7.928	2.23e-15	???+-???++++-?+-?+-??---++?+---++++-?-+-+----+++--?+-?--???-+????++-+-+?++++	0.008744	34.1762	273057	2.627	0.008616	0.04162	36.0436	-0.777	0.4369	0.1449	23.0011	6.591	4.379e-11	0.6044	0	0.6044	0	-0.0041514	0.0017419	0.0171593
4	106263450	rs2726485	T	G	0.5855	7.917	2.432e-15	-++---++++----++++---+--++++++-+++---++++-+++++++-+----++-+++-+-++-++++-++++	0.7483	0	300486	5.423	5.853e-08	0.5726	0	-0.053	0.9575	0.8632	0	4.646	3.385e-06	0.8565	0	0.8565	0	0.0056333	0.0017407	0.00121143
6	26828359	rs190945449	T	C	0.1124	7.909	2.587e-15	???++???-----?+-++---+-+--?-+-++---+?-+--------+++?---+-???-+????++---++-+--	0.6822	0	275414	-4.474	7.691e-06	0.5346	0	-2.877	0.004019	0.719	0	-4.63	3.659e-06	0.2783	22.0374	0.2783	22.0374	-0.0037938	0.0017462	0.0298126
6	98459501	rs78323999	T	C	0.1357	7.909	2.601e-15	???-????----++-+?-+??+++--?-+++---++?+-+-++++-+--+??+?++???--????--+-+-?----	0.05239	25.2347	272676	-2.68	0.007358	0.2954	11.9348	1.934	0.0531	0.2837	12.5842	-5.953	2.629e-09	0.8782	0	0.8782	0	-8.5857e-05	0.0017127	0.960017
6	98553660	rs1601732	A	G	0.3631	-7.904	2.691e-15	++-+----+-+---+-++-+++-++--+-+--+++-++++--+--++-+-++++-+-++--++--+--++-?++++	0.4381	1.64414	300310	2.706	0.006803	0.2694	11.1762	1.482	0.1383	0.7026	0	6.63	3.355e-11	0.7362	0	0.7362	0	-0.005184	0.0017564	0.00316228
6	26761745	rs34244947	T	C	0.8891	-7.899	2.805e-15	+--++--++-+--++-?++-++---+-+-+-+++--++++++++-+-+++--+-+++--++-+++++++++-++++	0.07342	19.844	300406	3.077	0.002089	0.2129	14.561	2.142	0.03216	0.04674	32.3631	5.308	1.108e-07	0.6292	0	0.6292	0	0.0041988	0.0017419	0.0159331
4	106260991	rs2647234	T	C	0.5863	7.896	2.888e-15	--++++++---+++-+--+---++-+--+-+++--+---++++++--+-+----+-+-+++--++-++--+?----	0.2265	10.6248	300310	-3.469	0.0005226	0.2048	15.0725	-1.284	0.1993	0.2377	14.8161	-5.737	9.612e-09	0.9394	0	0.9394	0	0.0055395	0.0017403	0.00145747
6	26537801	rs6920256	A	G	0.1296	7.894	2.925e-15	---+++---++-------+++++---+--++---+------+++---+++++--+-+----+--++-------++-	0.68	0	300486	-4.887	1.025e-06	0.4366	1.87902	0.442	0.6584	0.9412	0	-3.953	7.73e-05	0.5101	0	0.5101	0	-0.0033826	0.00177	0.0560015
3	52565100	rs6778735	T	C	0.4491	-7.894	2.927e-15	-++--++-+++++-+++-++++-++++-+-+++++---++++--+++-+++-++-++++--+-++-+-++--++++	0.003818	32.8817	300486	1.78	0.07501	0.005036	40.0614	0.938	0.3484	0.1416	21.718	5.919	3.24e-09	0.85	0	0.85	0	0.0015291	0.0017448	0.380803
6	27072542	rs55834529	A	G	0.902	-7.888	3.082e-15	--+++-+++-+++++-+++-++-+-+++++-++++-++--+-+-+-++-+--++--+++++++---+-+++-++++	0.6589	0	300486	4.501	6.772e-06	0.2628	11.5631	0.04	0.9683	0.9757	0	4.543	5.534e-06	0.2943	19.181	0.2943	19.181	0.0036871	0.0017371	0.0337909
6	26454363	rs34605993	T	C	0.1089	7.886	3.112e-15	??+-+--++++++?-+--+++++-++?+-+-++++-?+-+++++-+----?+++-+???+--+-----++-++-++	0.5974	0	288805	4.035	5.467e-05	0.4355	1.94528	1.922	0.05462	0.5768	0	4.614	3.945e-06	0.4136	0	0.4136	0	-0.0046041	0.0017408	0.00817523
16	28883327	rs28433345	T	C	0.3533	7.884	3.177e-15	-+++-+-++++-+--++-++---+--?++-++-+++-+-++++-----+-++++-++++-+++-+---+-++++++	0.2413	9.93294	297920	3.248	0.001162	0.3362	7.47989	-0.096	0.9232	0.5674	0	6.336	2.352e-10	0.1397	45.2754	0.1397	45.2754	-0.0029246	0.0017362	0.0920874
6	26456074	rs36033628	T	G	0.8915	-7.883	3.192e-15	-+++++-++++---++-+---+--+--++--++++-++-+--+--+-+--++-+++++--+---+---+-+-+-++	0.0742	19.6667	300486	5.664	1.481e-08	0.3209	8.25898	-1.344	0.1789	0.4118	3.45627	4.485	7.295e-06	0.1835	38.0805	0.1835	38.0805	0.0045521	0.0017408	0.00892483
4	103146888	rs35225200	A	C	0.9187	7.882	3.211e-15	---++++-+--+++++-+-+-+-----+++-++++++++-+++-+-+--++-++-+-++-+-++++-++-+-++-+	0.2774	8.27147	300486	1.957	0.05032	0.6015	0	0.86	0.3896	0.2833	11.6035	6.623	3.518e-11	0.411	0	0.411	0	-0.0023776	0.0017155	0.165768
6	26455814	rs35680819	T	C	0.8912	-7.882	3.217e-15	+----++-+++--++-++--+-+++-++---+-++-+++++--+-+-++-++++-+-+-+---+-++-++-?++++	0.4919	0	300310	3.722	0.0001979	0.2353	13.1869	1.043	0.2968	0.7178	0	5.118	3.085e-07	0.4772	0	0.4772	0	0.0045817	0.0017408	0.00848985
4	106267729	rs2647263	T	C	0.5848	7.879	3.298e-15	+---?-+--++----+?-+?-+++--+--+++--++-----++++-+--+--+?+-+-+++---+-+--+-?----	0.01889	27.6351	298126	-3.313	0.0009244	0.2357	13.1662	1.362	0.1731	0.1242	24.8821	-6.83	8.469e-12	0.3637	5.86759	0.3637	5.86759	0.0055459	0.0017416	0.00145111
1	41781151	rs1892419	T	C	0.772	7.877	3.363e-15	???++???------??+?----++--?---++---+?-+--------+++?---+-????+????+++--++-+--	0.709	0	271373	-4.681	2.861e-06	0.5357	0	-2.907	0.003649	0.779	0	-4.492	7.056e-06	0.2961	18.8531	0.2961	18.8531	-0.00060422	0.0017285	0.726658
4	106257007	rs2466917	A	C	0.6106	7.876	3.373e-15	???+++??-----?+-++---+-+--?-+-++---+?----------+++??--+-???-+????++---++-+--	0.6565	0	274218	-4.259	2.051e-05	0.4862	0	-2.885	0.003912	0.7168	0	-4.615	3.923e-06	0.2705	23.4303	0.2705	23.4303	0.0058747	0.0017398	0.0007335
6	98560826	rs1906251	A	C	0.6368	7.876	3.381e-15	???--???+++++?-+--+++-+-++?+-+--+++-?++++++++++---?+++-+???+-????--+++--+-++	0.695	0	275414	4.437	9.131e-06	0.5131	0	2.889	0.00386	0.7483	0	4.651	3.301e-06	0.2839	21.0526	0.2839	21.0526	0.005222	0.0017566	0.00295189
4	106256296	rs2726480	A	G	0.5968	7.876	3.386e-15	-----++-----+--++----+--++----+-+-+++-++-++-+--+++--+-------+---++++---+----	0.03237	24.37	300486	-4.471	7.792e-06	0.2252	13.8024	0.777	0.4369	0.06482	29.4101	-5.689	1.277e-08	0.5542	0	0.5542	0	0.0054604	0.0017366	0.00166456
3	52566682	rs7636227	A	G	0.553	7.876	3.393e-15	++++++++-++--+++++--++++---++-++-+-+++-+-+---++--++--+-----+-+--+--++-++++++	0.6135	0	300486	2.608	0.009097	0.4786	0	1.021	0.3071	0.568	0	5.028	4.964e-07	0.7057	0	0.7057	0	-0.0013806	0.0017451	0.428894
6	26463271	rs3823158	A	T	0.1088	7.874	3.445e-15	-++++-+-++-+-+++-++++-+++++++-+--+--++--+-++--+-++++-+-+++-+------+--++-++++	0.06968	20.0674	300486	1.976	0.04815	0.1094	21.9649	-0.175	0.8607	0.6193	0	6.906	4.993e-12	0.3283	12.8414	0.3283	12.8414	-0.004508	0.0017407	0.00960506
4	106258728	rs2647233	T	C	0.5968	7.873	3.455e-15	+---?----++----+?-+?-+++--+--+++--++?----++++-+--+--+?+-+++++---+-+----?----	0.01537	28.6984	296200	-3.356	0.0007898	0.2204	14.2424	1.358	0.1743	0.1105	26.2058	-6.796	1.076e-11	0.3241	13.6442	0.3241	13.6442	0.005414	0.0017367	0.00182474
6	26843517	rs57440165	A	C	0.8997	-7.873	3.462e-15	+-+--+----------?----+-+--+--++-+--+--+----++-----+--++---+--+--++-+++----+-	0.5537	0	300406	-3.216	0.001302	0.337	7.36238	-0.723	0.4697	0.6576	0	-5.213	1.859e-07	0.6998	0	0.6998	0	0.0036666	0.0017416	0.0352696
6	26462104	rs35627490	T	C	0.1088	7.871	3.527e-15	+++++--+++++-++-+++++-++-+++++-+-+--++--+--+-++---?+-+++++++-+++----+++-++++	0.06554	20.5625	300049	4.151	3.307e-05	0.4473	1.27832	-0.576	0.5647	0.03322	34.3459	5.412	6.225e-08	0.6914	0	0.6914	0	-0.00452	0.0017407	0.00941456
6	28839353	rs3131094	A	C	0.1102	7.865	3.677e-15	+-+------++-----+-+-++---++-----+---+--+---+--+++-----+------------+-+++--+-	0.9475	0	300486	-2.97	0.002976	0.8238	0	-1.278	0.2013	0.9608	0	-5.82	5.895e-09	0.1991	35.5255	0.1991	35.5255	-0.0030457	0.0017497	0.0817335
16	28917644	rs7188071	T	C	0.3472	-7.865	3.688e-15	+---++-+---+-+-+--+++-++--------+-+-+--+++------++-++-+--+---+---++----+----	0.5534	0	300486	-4.217	2.476e-05	0.3958	4.12962	-0.976	0.3292	0.5046	0	-3.876	0.0001061	0.9312	0	0.9312	0	-0.0018878	0.0017341	0.276319
16	28893295	rs62037373	C	G	0.3535	7.861	3.816e-15	+++--++++-+--+---+-----+++++-+---++-++++++---++---+-++++-++++-+++--+++++++++	1.191e-05	45.7877	300486	4.344	1.401e-05	0.006715	38.9098	-0.982	0.3262	0.002133	47.3019	4.856	1.199e-06	0.05181	61.2153	0.05181	61.2153	-0.0029063	0.001736	0.0941022
16	28881001	rs11150623	T	G	0.65	-7.859	3.866e-15	++-++-++++-++-+++---+-+-++++++-+-+--++-++++--++---+---+++--+--++----+--++-++	0.02949	24.8316	300486	4.338	1.44e-05	0.5365	0	0.004	0.9971	0.01136	40.436	6.791	1.111e-11	0.1952	36.1702	0.1952	36.1702	0.0031654	0.0017362	0.068281
6	26463660	rs13195509	A	G	0.1088	7.859	3.872e-15	---+++----+++-+?+++-++-+-----+----++---+---++-++-+++--+-----+-----+----+----	0.4362	1.7199	300127	-4.952	7.356e-07	0.5376	0	-0.774	0.439	0.3519	7.23275	-5.226	1.73e-07	0.3603	6.54206	0.3603	6.54206	-0.0045752	0.0017407	0.00858025
4	106066982	rs7661349	T	C	0.3563	-7.85	4.161e-15	-+-++-++-+-++--+++++++-+---++-+---++--+-+--------+?++-+----++-+-++-++-+-----	0.08026	19.2607	300049	-0.491	0.6236	0.461	0.502589	-1.853	0.06389	0.1827	18.5048	-6.377	1.802e-10	0.4345	0	0.4345	0	-0.0078176	0.0017336	6.50279e-06
4	106152984	rs7683416	T	C	0.4554	7.849	4.181e-15	-+--+-+-+++---++?+-?+?+-++-++-++-++--++++++--+-++-++--++++-++-++--+--+-+++++	0.1709	13.5571	300219	2.829	0.004669	0.08647	24.0598	1.604	0.1087	0.3207	9.56592	4.608	4.074e-06	0.9547	0	0.9547	0	0.0045344	0.0017523	0.00966273
3	49897830	rs2681780	T	C	0.501	-7.846	4.301e-15	++++-++++++---++-+---+++++-+---+++++++-++-+--+----?+-++++---+--++-+++++-+-+-	0.05263	21.8775	300049	5.767	8.081e-09	0.4734	0	-0.024	0.9812	0.1796	18.7388	4.4	1.084e-05	0.009709	73.705	0.009709	73.705	-0.004764	0.0017491	0.00645506
3	49915506	rs9862795	A	T	0.4803	7.845	4.336e-15	++++++++++----++-+++++++++-+-++--+----+--+++-+-+-++++++++---++-++++-++--++++	0.8184	0	300486	2.75	0.005964	0.8685	0	3.302	0.000961	0.6425	0	3.826	0.0001305	0.2959	18.897	0.2959	18.897	0.0048024	0.0017482	0.00601312
1	41783873	rs2363810	A	G	0.2265	-7.842	4.433e-15	???----?+++++?-+--+++---++?+-+--+++-?++++++++++---?+++-+???+-???+--+++--+-++	0.623	0	276679	4.41	1.035e-05	0.5106	0	2.87	0.004106	0.6955	0	4.531	5.873e-06	0.2106	33.5989	0.2106	33.5989	0.00020797	0.0017288	0.904247
3	49910084	rs1317154	T	C	0.4976	7.842	4.443e-15	???++???--------++----++--?-+-++---+?-+--------+++?---+-???-+????+++--++-+--	0.6703	0	276693	-4.83	1.362e-06	0.5318	0	-2.801	0.00509	0.7372	0	-4.606	4.095e-06	0.2606	25.1497	0.2606	25.1497	0.0046992	0.0017495	0.00723269
3	49907111	rs6446187	A	C	0.5006	-7.841	4.478e-15	++-+--+--+++-++++--+--+--------+-++-+-+-----+----+--------+++----+-+-+++----	0.7386	0	300486	-1.937	0.05274	0.9304	0	-1.895	0.05805	0.2494	13.8302	-5.484	4.166e-08	0.8766	0	0.8766	0	-0.0047357	0.0017492	0.00678422
3	49898273	rs2681781	A	G	0.499	7.836	4.659e-15	???+????++++--+-?+-??---++?-+--++++-?+++++---++++-?--?-++---+????+++--+?++++	0.01684	30.6553	278310	2.478	0.01321	0.6366	0	-0.747	0.4549	0.01113	43.6236	7.139	9.372e-13	0.6248	0	0.6248	0	0.0047572	0.001749	0.0065298
1	41779673	rs1892417	T	C	0.773	7.832	4.797e-15	???++???--------++----++--?-+-++---+?-+----+---+++?---+-???-+????+++--++-+--	0.6972	0	276693	-4.741	2.126e-06	0.502	0	-2.776	0.005501	0.7712	0	-4.48	7.482e-06	0.3296	12.6129	0.3296	12.6129	-0.00070121	0.0017297	0.685188
4	106074826	rs6533181	T	G	0.3563	-7.826	5.029e-15	+--+-+------+--++++++---------++------+---+--++++-+---++++--+------+--------	0.2962	7.46339	300486	-5.7	1.201e-08	0.5767	0	0.122	0.9031	0.4592	0.421549	-3.26	0.001114	0.2856	20.7398	0.2856	20.7398	-0.0079178	0.0017342	4.9831e-06
6	26824920	rs55664827	T	C	0.8876	-7.823	5.175e-15	-+-??++-+++---++?+-???++++-++-++-++-+++++++--+--++++--++++-++-++--++-+-+++-+	0.1886	12.8535	299874	3.434	0.0005941	0.2051	15.0491	1.395	0.1629	0.176	20.711	4.886	1.03e-06	0.6728	0	0.6728	0	0.0037997	0.0017463	0.0295665
6	29372323	rs429479	A	G	0.8818	-7.818	5.377e-15	+----++-+++--++-++--+-+++-++-----++-++-++--+-++++-++++-+-+-+---+-++-++-?++++	0.4028	3.08301	300310	3.591	0.0003297	0.2089	14.8157	1.053	0.2922	0.6308	0	5.092	3.549e-07	0.4375	0	0.4375	0	0.003333	0.0017427	0.0558085
6	98567517	rs9490616	A	C	0.3639	-7.815	5.5e-15	----+-+++--+++-+++-+-+--+-++++-+-+-+-++-+++-+++--++++++-+-++++++---+++-+++++	0.6509	0	300486	3.162	0.001568	0.9327	0	1.428	0.1533	0.1083	24.6666	4.259	2.05e-05	0.5149	0	0.5149	0	-0.0048695	0.0017541	0.00550174
4	106264589	rs2647237	T	C	0.584	7.812	5.608e-15	++++-++++++---++-+---+++++-+---+++++++-+--+--+----?+-++++---+--++-+++++-+-+-	0.07914	19.354	300049	5.831	5.514e-09	0.6308	0	0.011	0.9915	0.1694	19.5085	4.355	1.33e-05	0.00988	73.6171	0.00988	73.6171	0.0059681	0.0017414	0.000609958
6	26468545	rs3734543	C	G	0.1092	7.812	5.626e-15	---++++-+--+++++-+-+-------+++-++++++++-++--+-+--++-++-+-++-+-++++-++-+-++-+	0.2145	11.1311	300486	1.914	0.05561	0.5294	0	0.748	0.4546	0.2608	13.0762	6.646	3.005e-11	0.4132	0	0.4132	0	-0.0046482	0.0017414	0.00760326
4	106193160	rs2726520	C	G	0.4689	7.81	5.741e-15	+++++-+++---+-+-+---+--++-++---++++-+++++-+--++---+-+-++++++--++---++--++-++	0.1349	15.3547	300486	3.836	0.0001248	0.6926	0	-0.244	0.8072	0.114	24.1313	5.982	2.198e-09	0.04212	63.3968	0.04212	63.3968	0.0048798	0.0017521	0.0053518
1	41785445	rs35932978	A	C	0.7736	7.807	5.876e-15	???++???++?+-?+-?+-?----+-?+-----+--?++-+--+-+-++-?--?-0???-+????++-+-+?++++	0.0106	33.3736	272263	2.249	0.02451	0.3301	9.44525	-1.558	0.1192	0.06124	31.9339	7.074	1.502e-12	0.9915	0	0.9915	0	-0.0001934	0.0017288	0.910928
1	41783552	rs16828067	A	G	0.7738	7.806	5.887e-15	++----+--------+---+------+---+-----+--+-+++-+--+--+-+++-+------++-+---+----	0.7535	0	300486	-5.334	9.588e-08	0.6492	0	0.234	0.8152	0.8865	0	-5.199	2.008e-07	0.4474	0	0.4474	0	-0.00019499	0.0017286	0.910186
4	106160365	rs7670522	A	C	0.4678	7.805	5.945e-15	-+--+---++-+---+----++-------+----+-+-+----+--------+-+---++--++++-++--+----	0.2663	8.75912	300486	-2.07	0.03841	0.4527	0.982746	-2.213	0.02687	0.1605	20.1937	-4.979	6.386e-07	0.6492	0	0.6492	0	0.0049442	0.0017524	0.00478189
6	98591810	rs2263208	C	G	0.6344	7.805	5.95e-15	---------+++---+-+--+--+++------+-++--+--+---++-+-?--+-++-+++-----++-+------	0.000961	37.0427	300049	-2.923	0.003466	0.3173	8.54302	-0.301	0.7634	0.001629	48.2116	-6.718	1.846e-11	0.01692	70.5969	0.01692	70.5969	0.0049927	0.0017569	0.00448539
1	41784465	rs67483852	T	C	0.2262	-7.805	5.957e-15	+--+---+-++-+-++-+-++---+++++++++++--++++----++++--++++++---++++--++++-+++++	0.01937	26.7864	300486	2.301	0.02141	0.001345	44.6167	1.326	0.1848	0.789	0	5.365	8.083e-08	0.2543	26.2356	0.2543	26.2356	0.00020284	0.0017286	0.906586
6	98585068	rs2450527	T	G	0.6345	7.8	6.186e-15	???++++?-----?+-++---+++--?-+-++---+?----------+++----+-???-+???-++---++-+--	0.657	0	277116	-4.427	9.542e-06	0.535	0	-2.733	0.006283	0.685	0	-4.552	5.324e-06	0.2637	24.6042	0.2637	24.6042	0.0049259	0.0017574	0.00506407
1	41781994	rs28541673	A	G	0.7737	7.799	6.259e-15	+++-+--+-+--+--+-+++--++++++++++++--++-+++---+----+-+++++--+++-+----++--++++	0.1838	12.6465	300486	3.66	0.0002518	0.5145	0	0.718	0.4728	0.05884	30.2001	5.679	1.357e-08	0.6216	0	0.6216	0	-0.00022981	0.0017288	0.89425
1	41792274	rs12026778	T	C	0.2259	-7.797	6.334e-15	-+---++-----+--+-+---+--------+---++--++--+-+--++++-+-------+---++-+---+----	0.02356	25.9003	300486	-4.652	3.288e-06	0.191	15.9593	0.455	0.6494	0.06759	29.0596	-6.164	7.101e-10	0.2568	25.816	0.2568	25.816	0.0002603	0.0017289	0.880323
1	41783603	rs16828071	A	G	0.2262	-7.797	6.334e-15	???++???-----?+-++---+-+--?-+-+---++?----------+++?---+-???-+????++---++-+--	0.6271	0	275414	-4.584	4.555e-06	0.4556	0.38115	-2.924	0.003455	0.7222	0	-4.621	3.824e-06	0.2772	22.2395	0.2772	22.2395	0.00021683	0.0017286	0.900177
1	32096815	rs10798879	T	C	0.3734	-7.797	6.363e-15	+-++--+-+-+-----++-+---+-+----+++----+--+-+++---+---+---+-+-+++-+++---++----	0.02906	24.9039	300486	-3.157	0.001595	0.2079	14.8791	-2.156	0.03111	0.02568	35.9781	-7.696	1.4e-14	0.9139	0	0.9139	0	0.0019272	0.0017538	0.271838
4	106190226	rs2647250	T	C	0.5445	-7.796	6.385e-15	+++++-++++---++++---+-+-++++++-+-+---+-+++---++---+-0-+++-+---++----+--++-++	0.004312	32.4866	300486	4.028	5.622e-05	0.1336	19.9968	0.022	0.9821	0.01153	40.365	5.782	7.392e-09	0.09201	53.4234	0.09201	53.4234	-0.004459	0.0017529	0.0109648
16	28913787	rs7189927	T	C	0.3473	-7.795	6.416e-15	??++-------++------+-?-+-----++++--+--+-+-+-+-+-++--+++--++?--+-?-+--+++--+-	0.1861	12.9017	297083	-4.423	9.732e-06	0.4419	1.5748	-0.542	0.5876	0.1424	21.9423	-3.893	9.909e-05	0.2524	26.5606	0.2524	26.5606	-0.0018284	0.0017342	0.291749
4	106108032	rs13109676	C	G	0.6487	7.795	6.436e-15	???++???--------++----++--?-+-++---+?-+--------+++?---+-???-+????+++--++-+--	0.6354	0	276693	-4.847	1.254e-06	0.4888	0	-2.799	0.00512	0.7275	0	-4.6	4.218e-06	0.2608	25.1123	0.2608	25.1123	0.0078004	0.0017347	6.90399e-06
4	106248230	rs2647258	T	C	0.6108	7.795	6.466e-15	???----?+++++?-+--+++-+-++?+-+-+++--?++++++++++---?+++-+???+-???+--+++--+--+	0.6662	0	276679	4.402	1.074e-05	0.5815	0	2.826	0.004716	0.689	0	4.439	9.039e-06	0.2261	31.0345	0.2261	31.0345	0.005969	0.0017397	0.000601174
1	32106494	rs7546297	A	G	0.3735	-7.794	6.513e-15	???+-???++++-?--++-++---++?+----++--?+++++---++++-?+-?-+???-+????+-+-+-?++++	0.2677	9.83013	273335	1.835	0.06645	0.8368	0	-0.282	0.7778	0.1601	20.7764	6.012	1.83e-09	0.4758	0	0.4758	0	0.001985	0.0017543	0.25784
4	106193334	rs2726519	T	C	0.4685	7.793	6.527e-15	+-----+-+++---+-++-++++-+--+-+++-++-+++--+---++-+-++++-+-+---++--++-++-?++++	0.3827	3.9011	300310	2.738	0.006178	0.3717	5.453	2.495	0.01259	0.3148	9.70233	5.788	7.123e-09	0.9913	0	0.9913	0	0.0049443	0.0017514	0.00475773
6	98586363	rs2450525	A	G	0.6346	7.793	6.554e-15	???+????++++-++-?+-??---++?+---+++--?++-+----+-++-??-?--???++????++-+-+?++++	0.007472	35.0495	272676	2.931	0.003382	0.3485	8.12495	-1.927	0.05403	0.07641	30.4045	7.345	2.061e-13	0.8954	0	0.8954	0	0.0049318	0.001757	0.00500035
1	32101775	rs10798881	C	G	0.6247	7.792	6.614e-15	-+++?+++++++-++-?+-??---++?+++--++--+-+++----+-++--+-?-+-----++-----+++?++++	0.1856	13.0913	295457	4.434	9.258e-06	0.8608	0	-0.955	0.3397	0.09991	27.713	7.821	5.25e-15	0.5788	0	0.5788	0	-0.0020288	0.0017554	0.247799
4	106181573	rs1032625	A	G	0.5314	-7.79	6.677e-15	+++--++-?++-++++-++--++-+++++++-+++-++++++------+-+--+++-++-++++-+--++--++++	0.141	15.0763	291414	5.885	3.975e-09	0.7967	0	-0.626	0.5312	0.0878	26.7328	7.605	2.855e-14	0.4339	0	0.4339	0	-0.0049579	0.0017531	0.00468382
1	41783233	rs28566545	A	G	0.2263	-7.788	6.83e-15	----++--+-++-++-+-----+-+++--+++++--++-++++++++-+-?--+-+++---+-++-++--++++++	0.1295	15.7703	300049	1.614	0.1064	0.2053	15.1934	2.466	0.01366	0.4011	4.13498	6.618	3.633e-11	0.5497	0	0.5497	0	0.00024556	0.0017288	0.887052
1	41782781	rs12041352	T	G	0.7737	7.787	6.844e-15	???+????+-++-++-?+-??--?++?++---++--?++++----+-++-?--?-++--++????++++-+?++++	0.008028	34.0599	278163	2.353	0.01864	0.7696	0	-1.569	0.1166	0.02291	40.1463	8.186	2.701e-16	0.8383	0	0.8383	0	-0.00023727	0.0017288	0.890836
16	28561982	rs13331170	T	C	0.5918	7.786	6.927e-15	???+????+-++-++-?+-??--?++?++---++--?++++----++++-?--?-++--??????++-+-+?++++	0.00723	34.939	276773	2.384	0.01711	0.7037	0	-1.553	0.1205	0.0229	40.1478	7.942	1.986e-15	0.8022	0	0.8022	0	0.0020688	0.0017386	0.234083
4	106105299	rs10461139	A	G	0.3512	-7.785	6.961e-15	-+++++-++++-+-+++-+----++++?+-++++++?+-++++--++-+-++++++++--+++-+---++++++++	0.2495	9.61655	294211	5.269	1.374e-07	0.4719	0	0.716	0.4737	0.3791	5.52074	7.349	1.995e-13	0.07135	57.2467	0.07135	57.2467	-0.0078043	0.0017347	6.83125e-06
1	41809640	rs12047439	A	T	0.2255	-7.784	7.002e-15	-----+-+-----+----++--+++-----+++------+-+-+-+-------+++---------+-----+----	0.6583	0	300486	-4.978	6.408e-07	0.9888	0	0.324	0.7461	0.1308	22.6346	-5.815	6.067e-09	0.634	0	0.634	0	0.00042135	0.0017281	0.807373
6	28141253	rs67297533	T	G	0.1038	7.784	7.02e-15	-+++-+-+--+-+----+-----+--+--+-+++++--+--++-++++----+-++--+--+++++--++-+----	0.0503	22.0163	300486	-2.291	0.02195	0.1082	22.0622	0.833	0.4049	0.4149	3.26013	-6.224	4.848e-10	0.4701	0	0.4701	0	-0.0037263	0.00174	0.0322329
6	26798796	rs374593247	T	G	0.1094	7.784	7.034e-15	--+++-++--+-----+-++--++-+----+---++--++--++--+++-+----+-+--++---+-+---+-++-	0.615	0	300486	-4.587	4.506e-06	0.579	0	0.21	0.834	0.9102	0	-4.883	1.047e-06	0.0447	62.7976	0.0447	62.7976	-0.0036572	0.0017469	0.0362994
3	52555316	rs13081028	A	G	0.5573	7.784	7.038e-15	???-????-+--+--+?-+??++?--?--+++--++?-----+++-+--+?++?+--?++-????--+-+-?----	0.00995	33.4106	277424	-2.327	0.01997	0.8214	0	1.559	0.119	0.02073	40.7613	-8.029	9.831e-16	0.8069	0	0.8069	0	-0.00092742	0.001744	0.594895
16	28605915	rs62031560	A	T	0.3694	-7.784	7.052e-15	---+++---+-++-+++-+++++--++-+-+++--+------+++--+++-+-+--+----+---++---------	0.0006876	37.7185	300486	-4.057	4.97e-05	0.06988	25.7954	0.865	0.3872	0.007003	42.6792	-5.045	4.54e-07	0.0792	55.7587	0.0792	55.7587	-0.0019491	0.0017369	0.261788
4	106262888	rs2647236	T	C	0.6246	7.783	7.068e-15	-++-+--+-+-----+++-+++-+---?+-+---+-+-+-+---+---++----+---++--++++-++-------	0.01523	27.9686	296137	-1.342	0.1795	0.2898	10.1072	-2.765	0.005701	0.03836	33.3763	-6.811	9.708e-12	0.2801	21.7323	0.2801	21.7323	0.00534	0.0017362	0.00209991
16	28606160	rs113208333	T	G	0.3708	-7.783	7.081e-15	++++-++-+++++-++++-++----?++++++++++++-+++-+++++++--+-+-+++--++++-++++-+++++	0.6549	0	300108	4.318	1.571e-05	0.8871	0	2.591	0.009571	0.1902	17.9543	5.599	2.158e-08	0.3659	5.42245	0.3659	5.42245	-0.0019415	0.0017369	0.263645
1	41782270	rs12724625	C	G	0.2263	-7.783	7.093e-15	???++???--------++----++--?-+-++---+?-+--------+++?---+-???-+????+++--++-+--	0.6291	0	276693	-4.857	1.193e-06	0.4725	0	-2.866	0.004152	0.738	0	-4.599	4.252e-06	0.2611	25.0562	0.2611	25.0562	0.000237	0.0017288	0.89096
4	106184229	rs2454205	T	C	0.5312	-7.782	7.149e-15	++-+++-++--++++--++++---++-+-+---++-+-+++++-+++----++---+++++++++++-+---++++	0.4378	1.64837	300486	3.028	0.00246	0.6355	0	-0.248	0.8042	0.5457	0	6.782	1.184e-11	0.4727	0	0.4727	0	-0.0046993	0.0017531	0.00734852
4	106152877	rs7658539	A	C	0.5308	-7.782	7.156e-15	++++-+-+-+---+--++++-+-++-+++++--+++-+-++++++-+++--+++++++-+++-+++-++++-++++	0.5213	0	300486	2.99	0.002791	0.3286	7.82985	2.169	0.03008	0.6029	0	4.266	1.986e-05	0.4769	0	0.4769	0	-0.0048045	0.0017526	0.00611787
6	98575858	rs9375216	T	C	0.3654	-7.781	7.198e-15	-+-++-++-+-++--+++++++-+---++-+-+-++--+-+--------++++-+----++-+-++-++-+-----	0.05814	21.1754	300486	-0.367	0.7138	0.3905	4.42055	-1.836	0.06638	0.1817	18.5756	-6.363	1.973e-10	0.4139	0	0.4139	0	-0.0049344	0.0017574	0.00498999
6	27091661	rs66462181	T	C	0.9017	-7.779	7.283e-15	--++--++++++++-++-++---+--+-+-++-+--+++--+--+-++--+++++++--+-+++---+++--++++	0.506	0	300486	3.504	0.0004581	0.8413	0	0.472	0.6369	0.1217	23.4342	4.765	1.886e-06	0.5408	0	0.5408	0	0.003558	0.001737	0.0405322
1	41793658	rs1316274	A	G	0.2263	-7.779	7.312e-15	???-????-+--+--+?-+??++?--?--+++--++?----++++-+--+?++?+--+++-????----+-?----	0.007832	34.1578	278163	-2.273	0.02301	0.7866	0	1.517	0.1291	0.01675	42.0173	-8.047	8.468e-16	0.8252	0	0.8252	0	0.00020359	0.0017288	0.906256
1	41794773	rs72667608	A	G	0.7737	7.778	7.354e-15	+++-+-++?+-+++++?-+--?++++++-+-++++-+++-+--+-+---+++-+-++---++++-+--++--++++	0.3035	7.27505	291242	3.889	0.0001007	0.5342	0	-0.836	0.403	0.3037	10.5574	4.844	1.27e-06	0.6196	0	0.6196	0	-0.0002002	0.0017285	0.907795
6	98579021	rs1487450	A	G	0.3652	-7.778	7.388e-15	+-+-++++++-+--++-+-+++-++--+++-+-+--++-+-++-++-+--+-+--++-+++-++++--++--++++	0.1213	16.1992	300486	4.541	5.612e-06	0.5882	0	1.558	0.1191	0.009493	41.2985	5.169	2.348e-07	0.8917	0	0.8917	0	-0.0049436	0.001757	0.00489892
6	98574920	rs3811067	A	G	0.3635	-7.777	7.419e-15	---++++-+--+++++-+-+-+--+--+++-++++++++-+++-+-+--++-++-+-++-+-++++-++-+-++-+	0.2371	10.0687	300486	1.948	0.05138	0.5024	0	0.647	0.5176	0.3266	8.83122	6.611	3.818e-11	0.4062	0	0.4062	0	-0.0049297	0.001754	0.00494652
3	52559705	rs11709284	A	G	0.5572	7.777	7.432e-15	-+--+--+-----++--++--++++-------------+---+-------++-+-+---++----+----+-----	0.599	0	300486	-4.198	2.696e-05	0.892	0	-2.552	0.01072	0.1323	22.5046	-5.527	3.261e-08	0.3855	1.31579	0.3855	1.31579	-0.00080078	0.0017443	0.64616
1	41784805	rs36015391	T	G	0.7734	7.776	7.485e-15	---++----++-------+--+-++-+--+++-+-+--+---+-+-++++-+------------++++--------	0.3161	6.62118	300486	-3.477	0.0005065	0.1026	22.5512	-0.187	0.8513	0.7463	0	-5.63	1.807e-08	0.9279	0	0.9279	0	-0.00019951	0.0017288	0.908126
1	41797583	rs12040046	A	G	0.7736	7.776	7.495e-15	+---+----++-+--+?-+??++?--+---++--++------+++-+--+-++?+--+++-------+---?----	0.04377	23.5728	297982	-3.147	0.001649	0.3638	5.889	1.379	0.168	0.2539	14.7334	-7.632	2.308e-14	0.6023	0	0.6023	0	-0.00019832	0.0017288	0.908668
6	26408551	rs75782365	T	G	0.903	-7.776	7.504e-15	--+----+?++++++-?+-++?--+++++++-+++-++++++------+-++++++++++-+++-+--+++-++-+	0.09813	18.0794	291242	5.842	5.144e-09	0.7796	0	0.212	0.8323	0.06205	30.5366	2.872	0.004075	0.1836	38.0549	0.1836	38.0549	0.0044414	0.0017392	0.0106561
6	27141904	rs35768595	T	C	0.0982	7.775	7.523e-15	++-+----?+-+---+++++---+-------+---+-----++-+-++-++-+----+-+----+-++-+-+----	0.8443	0	291414	-4.19	2.788e-05	0.6767	0	-0.902	0.3671	0.7024	0	-4.811	1.505e-06	0.8958	0	0.8958	0	-0.0034422	0.0017375	0.0475664
16	28915217	rs8046545	A	G	0.6566	7.775	7.56e-15	+++????++++-?+--??????+?+???-++++++---?++--?-+??+-?+++?++?-??++--??+++-?+-++	0.4397	1.68769	284025	1.991	0.04646	0.5738	0	2.145	0.03195	0.7129	0	4.96	7.067e-07	0.03093	66.2162	0.03093	66.2162	0.0016931	0.0017342	0.32892
4	106167744	rs62330911	T	C	0.5309	-7.774	7.577e-15	--++?++++-++-++-?+-?----++-+++-+++---++-+--+-+-++-++++++-++-+--+-++++++?++++	0.3693	4.52369	300029	2.362	0.01817	0.5127	0	-0.414	0.6792	0.4614	0.122926	6.052	1.429e-09	0.8603	0	0.8603	0	-0.0047817	0.0017528	0.00637089
1	41794810	rs72667610	A	G	0.2263	-7.773	7.691e-15	???-+???--?-+?-+--+--+++++?++++++-++?-----+++-+--+?-+?+-???+-????---+-+?----	0.3392	6.41325	272438	-1.928	0.05391	0.7454	0	0.321	0.7482	0.2509	14.2966	-6.012	1.832e-09	0.7073	0	0.7073	0	0.00019934	0.0017285	0.908189
16	28919341	rs7206214	A	G	0.3433	-7.771	7.8e-15	+++-+--+++++-+-+-+++++--+++++++-++++-+-++++-+++---++++-+-+++-+------++-++-++	0.5767	0	300486	3.814	0.0001368	0.7743	0	3.008	0.002626	0.3827	5.29406	3.397	0.0006819	0.2067	34.2538	0.2067	34.2538	-0.0017434	0.0017342	0.31476
6	26454956	rs66757203	T	C	0.1093	7.771	7.802e-15	+---+---?---+---++-+-+----?---+++---+-+-+--++++-+++--?----++-++----+-++?--+-	0.004934	32.7033	286769	-4.4	1.082e-05	0.01007	37.8364	-2.037	0.04166	0.07719	28.6388	-3.485	0.0004927	0.3972	0	0.3972	0	-0.0044847	0.0017413	0.0100115
4	106189614	rs2726521	T	G	0.5316	-7.771	7.812e-15	---+-++-+++-+-++---+--++++--+-+++-----+-+---++--++-++--+-+-+-----+----------	0.0704	20.0017	300486	-2.071	0.03833	0.369	5.60249	-0.781	0.4346	0.1147	24.0756	-6.988	2.788e-12	0.4118	0	0.4118	0	-0.0049459	0.0017527	0.00477529
6	26409890	rs41266839	C	G	0.0969	7.77	7.862e-15	-++++--+---++--+--++-+---+--+++++--+-----0+-+----+----+++-+-+++-+--+--+?----	0.5616	0	300310	-3.861	0.0001128	0.3634	5.90671	-1.084	0.2786	0.6083	0	-4.886	1.03e-06	0.5652	0	0.5652	0	-0.0045331	0.0017373	0.00907194
1	41797999	rs35690915	T	C	0.7736	7.768	7.996e-15	-++---++-+--+-+++----++-++++++-+++---++++0+++++++-+----++-+++-+-++--+++-++-+	0.7641	0	300486	5.03	4.908e-07	0.4671	0.174694	0.172	0.8634	0.903	0	4.417	1.001e-05	0.8382	0	0.8382	0	-0.00019721	0.0017288	0.909176
4	106267237	rs2647262	A	T	0.3775	-7.768	8.002e-15	----+------+++--+-++------+-+++-------+-++-++-+-+-?------+++-++--+---+-+---+	0.1658	13.6734	300049	-6.003	1.939e-09	0.7862	0	-0.054	0.9569	0.2181	15.964	-4.196	2.713e-05	0.01986	69.5524	0.01986	69.5524	-0.00529	0.0017361	0.002311
1	41798269	rs12728217	T	C	0.2264	-7.767	8.01e-15	???++???------?-++----++--?-+-++---+?-+--------+++?---+-???-+????+++--++-+--	0.662	0	274440	-4.905	9.327e-07	0.4973	0	-2.818	0.004831	0.7676	0	-4.593	4.367e-06	0.2566	25.8527	0.2566	25.8527	0.00019781	0.0017287	0.908902
6	98580836	rs2450518	A	G	0.3646	-7.767	8.011e-15	???++++?-----?+-++---+++--?-+-++---+?----------+++----+-???-+???-++---++-+--	0.6565	0	277116	-4.416	1.006e-05	0.5202	0	-2.777	0.005486	0.705	0	-4.543	5.538e-06	0.254	26.2899	0.254	26.2899	-0.0049087	0.0017547	0.0051511
16	28607070	rs4149406	A	G	0.6289	7.766	8.072e-15	---++++-+--+++++-+-+-+--+--+++-++++++++-+++-+-+--++-++-+-++-+-++++-++-+-++-+	0.2472	9.61133	300486	1.926	0.05416	0.5021	0	0.656	0.5118	0.3395	8.01778	6.59	4.397e-11	0.4256	0	0.4256	0	0.0019324	0.0017369	0.265901
10	103989812	rs10786662	C	G	0.568	-7.766	8.087e-15	-+--++-+-+-+++++--+-+++-+-++++---++++-++-+---+++-+++-+++-+-+---+---+++--++++	0.03494	23.9829	300486	3.22	0.001282	0.2341	13.2584	2.143	0.03211	0.02631	35.8302	7.666	1.77e-14	0.8962	0	0.8962	0	-0.0014985	0.0017436	0.390131
3	49920571	rs9843653	T	C	0.4994	7.766	8.091e-15	--+-++++---------+++++--++?+++--++-+-+++++++-++-+-?++++++++--++-+-+-+-+-++++	0.8401	0	297483	1.488	0.1369	0.9445	0	1.371	0.1703	0.4674	0	5.572	2.525e-08	0.8925	0	0.8925	0	0.0046976	0.0017485	0.00721772
1	41784971	rs28399806	T	C	0.2263	-7.766	8.097e-15	???++???-----?+-++-----+--?---++--++?------+---+++??--+-???-+????++---++-+--	0.6948	0	273860	-4.049	5.133e-05	0.8141	0	-3.313	0.0009217	0.5153	0	-4.403	1.066e-05	0.3158	15.2063	0.3158	15.2063	0.00025183	0.0017288	0.884185
1	41798773	rs12732820	T	C	0.2264	-7.766	8.114e-15	???++???------?-++----++--?-+-++---+?-+--------+++?---+-???-+????+++--++-+--	0.667	0	274440	-4.909	9.151e-07	0.5033	0	-2.812	0.004918	0.7669	0	-4.592	4.383e-06	0.2625	24.8309	0.2625	24.8309	0.00019758	0.0017287	0.909007
6	98569894	rs2046604	T	G	0.3651	-7.765	8.139e-15	???++++?-----?+-++---+-+--?-+-++---+?----------+++?---+-???-+???-++---++-+--	0.6829	0	276679	-4.397	1.097e-05	0.5683	0	-2.817	0.004852	0.6789	0	-4.656	3.225e-06	0.2851	20.8443	0.2851	20.8443	-0.0049201	0.001757	0.00510623
6	26511076	rs9379882	T	C	0.1316	7.765	8.179e-15	+--??-?+--++?--+?+????+?++--------+?+++-----+-+--+?--?---+-+?+--+??+-++?--+-	0.2813	9.02674	295363	-2.511	0.01205	0.3778	5.29805	-1.708	0.08756	0.1791	23.2436	-4.702	2.573e-06	0.4517	0	0.4517	0	-0.0035155	0.0017743	0.0475554
6	98589701	rs2450512	T	G	0.3656	-7.764	8.222e-15	+--------++-----+---++---++-----+---+-++-+---+++------+-----------++-++---+-	0.8698	0	300486	-3.74	0.0001842	0.7341	0	-1.091	0.2753	0.9455	0	-5.694	1.243e-08	0.06034	59.4266	0.06034	59.4266	-0.0049476	0.0017569	0.00486295
16	28915527	rs10499	A	G	0.6568	7.763	8.276e-15	+--+--+----+-+---+-++++----?-+------?-+----++--+-+--------++---+-+++--------	0.3112	6.90794	294211	-5.06	4.2e-07	0.5278	0	-0.819	0.413	0.3938	4.59229	-7.326	2.365e-13	0.08566	54.573	0.08566	54.573	0.0017002	0.0017343	0.326904
1	41798517	rs12752553	T	C	0.7736	7.763	8.302e-15	--++?+-++-++-++-?+-??--?++-++---+++--++++----+-++-+--?-++---++++++--+-+?++++	0.05799	22.0568	297876	3.196	0.001395	0.803	0	-1.554	0.1202	0.04823	34.8977	7.503	6.251e-14	0.7125	0	0.7125	0	-0.00019802	0.0017287	0.908806
4	106195572	rs2647244	A	G	0.5303	-7.762	8.376e-15	+--++-----+---++--++-++---+----+-++-------+++--+++++--+--------+-+++---+----	0.1378	15.1766	300486	-2.418	0.01562	0.2246	13.8358	-0.471	0.6378	0.4088	3.64542	-6.892	5.51e-12	0.4533	0	0.4533	0	-0.0046854	0.0017526	0.00750758
1	41800257	rs12724690	T	C	0.7736	7.761	8.421e-15	???--???++++++-+--++++--++?+-+--+++-?++++++++++---?+++-+???+-????--+++--+--+	0.6006	0	276693	4.857	1.192e-06	0.4423	1.39688	2.826	0.004711	0.7283	0	4.614	3.949e-06	0.2474	27.4135	0.2474	27.4135	-0.00019823	0.0017287	0.908707
1	41796264	rs35410722	T	C	0.2265	-7.76	8.468e-15	-----+---++--------++-+---+--++---+---+--+--++-++++---+----+-+--++-+-+---+--	0.8068	0	300486	-4.775	1.795e-06	0.7807	0	0.593	0.5532	0.908	0	-4.93	8.212e-07	0.2533	26.4165	0.2533	26.4165	0.00019726	0.0017288	0.909155
16	28566158	rs3859172	T	G	0.4086	-7.76	8.521e-15	---++++-+--+++++-+-+-+--+--+++-++++++++-+++-+-+--++-++-+-++-+-++++-++-+-++-+	0.2466	9.63855	300486	1.95	0.05119	0.4969	0	0.665	0.506	0.3389	8.05161	6.593	4.305e-11	0.4265	0	0.4265	0	-0.002106	0.0017388	0.225814
6	26514940	rs12176129	T	C	0.1316	7.76	8.525e-15	???--???++++++-+--++++--++?+-+--++--?+-++++++++---?+++-+???+-????--+++--+--+	0.6292	0	276693	4.861	1.167e-06	0.4437	1.2955	2.929	0.003398	0.7693	0	4.617	3.894e-06	0.2506	26.8828	0.2506	26.8828	-0.00355	0.0017744	0.0454255
16	28565667	rs7191618	C	G	0.5914	7.759	8.563e-15	???++???+-+--?+--+-+----+-?+----+-+-?-++-+-+---++-??-?-+???-+????++-+++?++++	0.01191	32.4233	271781	1.84	0.06579	0.2779	13.4165	-1.704	0.08843	0.1166	24.5364	6.613	3.763e-11	0.7269	0	0.7269	0	0.0020595	0.0017388	0.236227
1	41800474	rs35464028	T	G	0.7737	7.759	8.593e-15	+++--+-+-+---+----++--++------+-+--+--+----+-+---+-+-+++---------++---++----	0.6912	0	300486	-4.316	1.591e-05	0.9639	0	0.782	0.4344	0.4974	0	-5.367	7.99e-08	0.1157	49.3072	0.1157	49.3072	-0.00021223	0.0017285	0.902283
6	98580861	rs2502933	T	C	0.6342	7.758	8.594e-15	???+????++++-++-?+-??---++?+---+++--?++-+----+-++-?+-?--???++????++-+-+?++++	0.005981	35.671	274230	2.885	0.003916	0.3223	9.85915	-1.877	0.06053	0.06229	32.2589	7.349	1.995e-13	0.8888	0	0.8888	0	0.0049735	0.0017574	0.00465479
1	41796817	rs34539673	A	G	0.2264	-7.757	8.694e-15	-++++++++++---++-+--++-+++--+--++++----+--+--+-+-+++-+++++--+---+---+-+-++++	0.1332	15.4529	300486	5.023	5.091e-07	0.4153	3.05615	-1.372	0.1702	0.4374	1.82282	5.107	3.28e-07	0.186	37.6688	0.186	37.6688	0.00020131	0.0017288	0.9073
1	41792523	rs4453028	A	G	0.2263	-7.757	8.729e-15	??-+-++------?+-++-----+--?-+-++---+?-+----++-++++?---+-???-++-+++++--+--+--	0.6658	0	288805	-4.009	6.108e-05	0.56	0	-1.935	0.05294	0.5689	0	-4.394	1.112e-05	0.3865	1.08803	0.3865	1.08803	0.00026148	0.0017289	0.879786
1	41788265	rs12043581	A	G	0.2263	-7.756	8.787e-15	???-????-+--+--+?-+??++?--?--+++--++?-----+++----+?++?+--+++-????--+-+-?----	0.01032	33.0322	278163	-2.346	0.01896	0.8299	0	1.525	0.1273	0.01915	41.2366	-8.172	3.028e-16	0.9067	0	0.9067	0	0.00025946	0.0017289	0.880704
6	26530419	rs67234939	A	G	0.8684	-7.755	8.853e-15	++--?----+--+--+?-+?++++--+---+---+++--+-++-+-+--+------+--+-++-+------?----	0.4023	3.14836	300029	-2.393	0.01672	0.5565	0	0.409	0.6829	0.4434	1.36945	-5.972	2.34e-09	0.8763	0	0.8763	0	0.0035627	0.0017744	0.0446581
1	41794301	rs12037129	T	C	0.7735	7.754	8.918e-15	-+++-+++++-+-++-?+-??--?++-+++--++--++++++---+-++-+--?-++---+++++++-+++?++++	0.05246	22.5285	297982	3.221	0.001276	0.3916	4.36113	-1.338	0.1808	0.2415	15.6415	7.566	3.861e-14	0.6258	0	0.6258	0	-0.00020184	0.0017289	0.90706
4	106259572	rs2726481	T	C	0.6245	7.752	9.047e-15	-+-+-++++++--++-?+-++---+--+++-+++---+-++----+-++-++-?-+-----+++-+--+++?++++	0.1554	14.4131	298327	3.095	0.001966	0.4693	0.0549698	-0.962	0.3363	0.2872	11.8108	6.809	9.828e-12	0.7054	0	0.7054	0	0.0053747	0.0017365	0.00196789
1	41791865	rs2363811	A	G	0.7737	7.752	9.065e-15	???-+???++++++?+-?++++--++?+-+--+-+-?+-++++++++---?+++-+???+-????---++--+--+	0.5357	0	272923	4.586	4.522e-06	0.3677	6.84282	2.883	0.003938	0.7344	0	4.416	1.005e-05	0.2005	35.289	0.2005	35.289	-0.00026014	0.0017289	0.880394
4	106174936	rs2647248	T	C	0.4489	7.752	9.081e-15	-+++?++++--++++-?+-?+---++-++---++--+++++----+-++-++-?-+-----+++-+-++++?++++	0.01407	28.9131	298126	3.423	0.0006189	0.1925	15.8586	-1.393	0.1636	0.1158	25.6881	6.757	1.408e-11	0.3486	8.89766	0.3486	8.89766	0.0043454	0.0017476	0.0129033
1	41781410	rs1892420	T	C	0.2261	-7.747	9.441e-15	++----+--------+---+------+---+-----+--+-+++-+--+--+-+++--------++-+---+----	0.7656	0	300486	-5.247	1.542e-07	0.6693	0	0.245	0.8064	0.8836	0	-5.184	2.175e-07	0.4354	0	0.4354	0	0.00028896	0.0017286	0.867239
1	41793358	rs35436312	A	G	0.2267	-7.746	9.447e-15	???--???--?-+?-+?-+?++++-+?--++++-++?--+-++-+-+--+?++?+0???+-????--+-+-?----	0.01947	30.5983	272263	-2.29	0.02204	0.4154	3.33291	1.573	0.1157	0.08484	28.9551	-7.073	1.519e-12	0.9951	0	0.9951	0	0.00020332	0.0017288	0.906377
6	27145341	rs35565446	T	C	0.0989	7.746	9.45e-15	-+-++++++--+++++-+++--+++--+++++-+++-++-+-++++--++++++--++++++-++++-+--+++-+	0.9761	0	300486	3.062	0.002202	0.8591	0	1.476	0.1399	0.9769	0	5.481	4.235e-08	0.2243	31.3344	0.2243	31.3344	-0.0033852	0.0017404	0.0517607
6	26510748	rs3799383	T	C	0.1316	7.746	9.472e-15	+++----+-++-----+-+-+++++++---+-----?--+--++-+-++--+--+-+--+-+----++-+-+--+-	0.1935	12.2266	298560	-1.894	0.05819	0.4731	0	-0.752	0.452	0.2632	12.9198	-6.605	3.978e-11	0.4205	0	0.4205	0	-0.0035365	0.0017742	0.0462275
1	41786907	rs35021924	A	G	0.7738	7.746	9.508e-15	-+-++++++--+++++-+++--+++--+++++-+++-++-+-++++--++++++-+++++++-++++-+--+++-+	0.9777	0	300486	3.105	0.001905	0.9029	0	1.405	0.16	0.9706	0	5.512	3.556e-08	0.1618	41.6342	0.1618	41.6342	-0.00024916	0.0017286	0.885389
6	98289395	rs75541746	A	G	0.1406	7.746	9.517e-15	++++-----++-+++++--+++--+-++++---++-++----++--+++-+-++-+-++-++++-+--++-?++++	0.3171	6.61871	300310	2.662	0.007757	0.3756	5.23573	0.091	0.9275	0.4177	3.0943	5.373	7.764e-08	0.411	0	0.411	0	-0.0011929	0.0017109	0.485657
1	32140053	rs4949457	T	C	0.3551	-7.745	9.539e-15	-++-----++--+--+-+-++--++--++-+---+++------+--++---++-+---+-+-+--+--+++-----	0.1795	12.8717	300486	-1.303	0.1926	0.3904	4.42512	-2.795	0.005197	0.2612	13.046	-6.069	1.283e-09	0.8044	0	0.8044	0	0.0035894	0.0017389	0.0389942
1	41786854	rs12042464	A	G	0.2262	-7.744	9.655e-15	---------+++++-+-+--+-+--+--------+-+-+--+----+-+------++-+++----+++-+------	0.005053	31.9592	300486	-2.596	0.009433	0.6403	0	-0.593	0.5532	0.001073	49.5383	-7.361	1.821e-13	0.1406	45.1353	0.1406	45.1353	0.00024904	0.0017286	0.885446
4	106178289	rs2133086	A	C	0.4622	7.743	9.704e-15	???----?+++++?-+--+++-+-++?+-+--+++-?++++++++++---++++-+???+-???+--+++--+-++	0.7112	0	277116	4.374	1.221e-05	0.6157	0	2.828	0.004682	0.6816	0	4.643	3.427e-06	0.28	21.7527	0.28	21.7527	0.0048367	0.001747	0.00562989
2	156021862	rs7609050	A	C	0.4755	-7.743	9.709e-15	-++++-++++-+-++-+++-+-++++++---++++--+-++----++----++-++--++--+-+-++++-++-++	0.0596	21.0277	300486	3.746	0.0001797	0.2598	11.7387	0.579	0.5624	0.03605	33.8011	4.308	1.649e-05	0.3866	1.08803	0.3866	1.08803	0.0031904	0.0017451	0.0675305
1	41799611	rs12045184	A	G	0.2254	-7.743	9.725e-15	??++++-++-+-+--++-+-+--++++++-+--++--+-++-+--+-++-+++++++++++++++---+-++++++	0.1607	14.0347	299093	4.562	5.077e-06	0.6272	0	0.232	0.8162	0.05953	30.1058	5.936	2.923e-09	0.3218	14.0893	0.3218	14.0893	0.00017782	0.0017276	0.91802
2	156023165	rs1994247	T	G	0.5243	7.741	9.848e-15	+-+-+-++-+--+++-+---+---++-++++-++---+++-----+--+-+-+++++--+-+-++---+-+-++-+	0.1556	14.1552	300486	3.026	0.002478	0.7489	0	-1.001	0.3167	0.3028	10.3487	7.227	4.923e-13	0.13	46.8933	0.13	46.8933	-0.0032267	0.0017454	0.064506
6	26755915	rs13213200	T	C	0.1122	7.74	9.951e-15	???++???------?-++----++--?-+-++---+?-+--------+++?---+-???-+????+++--++-++-	0.6384	0	274440	-4.891	1.001e-06	0.4751	0	-2.856	0.004293	0.7619	0	-4.54	5.627e-06	0.2541	26.2899	0.2541	26.2899	-0.0045225	0.0017415	0.00940806
12	79685226	rs7963801	T	C	0.4165	7.738	1.01e-14	+++----+++-----+++++----+-++----+---++---+--+---+++++++-++++++-+-++++-++++++	0.06782	20.2365	300486	3.181	0.001469	0.04157	29.5067	0.033	0.974	0.3095	9.91803	4.889	1.013e-06	0.8274	0	0.8274	0	-0.0029589	0.0017429	0.0895571
4	106254352	rs2647260	T	G	0.3755	-7.738	1.011e-14	++-----+-+++----+-+-+-++-++---+-----+--+-+-+-+-++--+--+-----------++-+----+-	0.4515	1.09194	300486	-3.229	0.001243	0.8268	0	-0.209	0.8343	0.3537	7.12074	-6.344	2.235e-10	0.08858	54.0371	0.08858	54.0371	-0.0055974	0.0017361	0.00126357
1	41792765	rs4406620	A	G	0.7739	7.738	1.012e-14	+--++-+-+-+-+-++++-+++--+++++--+-++-++-++++-+-+++-+-+---+++++++++--++++-++++	0.7277	0	300486	4.563	5.05e-06	0.9553	0	-0.817	0.4138	0.5962	0	5.026	5.003e-07	0.1263	47.5066	0.1263	47.5066	-0.00026737	0.0017285	0.877074
1	41801408	rs34152153	T	C	0.7735	7.735	1.033e-14	??+-+--++++++?-+--+++++-++?+-+-++++-?+-+++++-+----?+++-+???+--+-?---++-++-++	0.5682	0	288078	4.046	5.207e-05	0.4484	1.12063	2.037	0.0417	0.5209	0	4.6	4.217e-06	0.4095	0	0.4095	0	-0.00023473	0.0017287	0.891988
16	28555706	rs9926245	A	T	0.4081	-7.732	1.06e-14	--+--+--+---++--++-+---+-+----+-----+-++----+-+---++-++------+---++--+-+-+--	0.5418	0	300486	-3.005	0.002655	0.3255	7.99945	-1.481	0.1386	0.8729	0	-4.323	1.539e-05	0.04628	62.439	0.04628	62.439	-0.0021237	0.0017385	0.221871
1	41791271	rs35592291	A	G	0.2262	-7.732	1.061e-14	+-+------++-----+---++---++-----+---+--+-+----++------++------+----+-++---+-	0.9751	0	300486	-3.055	0.002249	0.8538	0	-1.458	0.1449	0.978	0	-5.492	3.973e-08	0.2186	32.2799	0.2186	32.2799	0.0002401	0.0017288	0.889547
3	49898000	rs2777888	A	G	0.4955	7.731	1.069e-14	???++++?-----?+?+?---+-+--??--++---+?------+---+++?---+-???-?????+----++-++-	0.7784	0	269528	-4.108	3.983e-05	0.5527	0	-2.617	0.008876	0.7985	0	-4.664	3.094e-06	0.2888	20.1703	0.2888	20.1703	0.0047537	0.001749	0.00656901
4	106109381	rs4699165	A	G	0.3522	-7.729	1.081e-14	+--++-+-+-+++-++++-+++--++++++-+-++-++-++++-+-+++-+-+---+++++++++--+++--++++	0.7356	0	300486	4.413	1.017e-05	0.9541	0	-0.736	0.462	0.5732	0	5.042	4.597e-07	0.1345	46.14	0.1345	46.14	-0.0077707	0.0017337	7.39265e-06
2	155687076	rs2591173	A	C	0.5308	7.729	1.087e-14	-++-+--+-+-----+++-+++-----?+-+---+-+-+-+---+---++----+---++--++++-++-------	0.01648	27.634	296137	-1.353	0.1761	0.291	10.0408	-2.761	0.005763	0.04247	32.663	-6.819	9.154e-12	0.2726	23.0572	0.2726	23.0572	-0.0023836	0.0017513	0.1735
4	106262836	rs2647235	A	G	0.3751	-7.727	1.101e-14	???+????+-++-++-?+-??---++?+---++++-?++-+----++++-?+-?--???++????+++--+?++++	0.0004439	43.635	274230	2.355	0.01851	0.176	20.7083	-2.064	0.03902	0.02318	39.5055	7.715	1.211e-14	0.9905	0	0.9905	0	-0.0053443	0.0017365	0.00208689
6	26463574	rs13195401	T	G	0.0939	7.724	1.123e-14	???--???++++++++--++++--++?+-+--+++-?+-++++++++---?+++-+???+-????---++--+-++	0.6636	0	276693	4.82	1.434e-06	0.5349	0	2.808	0.004982	0.725	0	4.607	4.085e-06	0.2605	25.1684	0.2605	25.1684	-0.0043775	0.0017387	0.0118168
20	47678201	rs6095417	A	G	0.3198	7.724	1.123e-14	+++++-++---+++--++-+-+++-++++--+--++++---+-++-+-+++---+-+-++---++++-+-++++-+	0.08254	18.9671	300486	0.79	0.4298	0.3463	6.84893	-0.05	0.96	0.6252	0	7.359	1.85e-13	0.3367	11.2426	0.3367	11.2426	0.0083584	0.0017449	1.66725e-06
1	41801912	rs12026404	A	C	0.2263	-7.724	1.127e-14	+--+------+++-+--+-++-++------+-+-+---+---+-+--+++?-+-++-+--+----+-+-+------	0.8724	0	300049	-4.868	1.129e-06	0.7893	0	-0.977	0.3286	0.6555	0	-5.433	5.534e-08	0.875	0	0.875	0	0.00023452	0.0017287	0.892087
4	106173199	rs2726518	A	C	0.4314	7.724	1.132e-14	+++++--++---++++-++-+-+++-++---+++--++++++---++++-++++++-+--+-++++-+++--++-+	0.2621	8.94522	300486	4.578	4.69e-06	0.1142	21.5517	1.515	0.1297	0.8919	0	4.704	2.554e-06	0.01964	69.6295	0.01964	69.6295	0.0045849	0.0017445	0.0085842
6	98585152	rs2450526	A	G	0.6342	7.723	1.136e-14	+-+-+----++-----+---++---++-----+---+-++------+++------0------+----+--++--+-	0.8666	0	300486	-3.117	0.001827	0.7017	0	-1.512	0.1305	0.8953	0	-6.024	1.701e-09	0.2575	25.6874	0.2575	25.6874	0.004933	0.001757	0.00498999
1	41801943	rs12047272	A	G	0.2263	-7.723	1.14e-14	???++???-----?+-++---+-+--?---+---++?-+----+---+++?---+-???-+????++---++-++-	0.8246	0	275414	-4.671	2.999e-06	0.7894	0	-2.618	0.00884	0.7353	0	-4.965	6.854e-07	0.2059	34.3976	0.2059	34.3976	0.00024307	0.0017287	0.888178
1	32088675	rs4949450	A	T	0.6257	7.722	1.148e-14	---++++--+-+--+++++++-+---+-+-+++--+---+--+++--+++-+----+----+---++---------	0.0004319	38.8419	300486	-4.325	1.528e-05	0.08827	23.8835	1.061	0.2887	0.003918	45.0761	-5.169	2.358e-07	0.08846	54.0652	0.08846	54.0652	-0.0021538	0.001754	0.219457
1	41801652	rs35807669	T	C	0.2263	-7.721	1.152e-14	---++------+-+---+++++-+-+--------+----+-++--+-+-++--+++---+----+-+----+--+-	0.2128	11.21	300486	-4.908	9.215e-07	0.5989	0	0.004	0.9965	0.1364	22.1527	-4.575	4.768e-06	0.2592	25.3917	0.2592	25.3917	0.00023661	0.0017287	0.89113
4	106171652	rs2647247	A	T	0.4505	7.719	1.17e-14	++++-+-+---+-+--+-+-+-----++-+--++-+++---+++--++-----++-+++++++-+-++++++++++	0.01117	29.0773	300486	1.896	0.05791	0.3159	8.54007	0.547	0.5844	0.02193	36.9191	7.277	3.418e-13	0.4029	0	0.4029	0	0.0043779	0.0017479	0.0122574
6	26555433	rs16901784	A	C	0.1313	7.719	1.173e-14	???--???++++++++--++++--++?+-+--+++-?+-++++++++---?+++-+???+-????---++--+--+	0.649	0	276693	4.846	1.257e-06	0.5001	0	2.847	0.00441	0.7522	0	4.459	8.235e-06	0.2605	25.1684	0.2605	25.1684	-0.0035398	0.0017713	0.0456667
2	156005993	rs10184990	A	G	0.5243	7.718	1.179e-14	-+--++--?-++----++-+-+-+-------+---+---+-++++-++-+?++-+-+++++---++++-+-+--+-	0.05539	21.699	290977	-5.415	6.143e-08	0.4247	2.5616	0.607	0.5436	0.1487	21.1377	-8.602	7.861e-18	0.4732	0	0.4732	0	-0.0032295	0.0017456	0.0642984
2	155682556	rs1445649	T	C	0.4672	-7.718	1.183e-14	???--???+++++?-+--++++--++?+-+--+++-?++++++++++---?+++-+???+-????--+++--+--+	0.6022	0	275414	4.709	2.487e-06	0.4454	1.1348	2.834	0.004591	0.7139	0	4.616	3.906e-06	0.2505	26.8828	0.2505	26.8828	0.002293	0.0017488	0.189802
2	155678837	rs1550798	A	T	0.4685	-7.717	1.189e-14	+-+--+---+++-++-++-++-+++--+++--+++++-+--+++++-+---+++++---+--++-+--+++-+-++	0.59	0	300486	3.751	0.0001764	0.575	0	2.1	0.03574	0.6926	0	5.568	2.582e-08	0.04673	62.3352	0.04673	62.3352	0.0025638	0.0017485	0.14258
2	156025572	rs16838817	A	G	0.5243	7.716	1.201e-14	???-+???++++++??-?++++--++?+-+--++--?+-++++++++---?+++-+????-????---++--+-++	0.7708	0	271373	4.715	2.416e-06	0.7556	0	2.926	0.00343	0.6986	0	4.544	5.51e-06	0.3067	16.9205	0.3067	16.9205	-0.003271	0.0017454	0.0609256
2	156013297	rs12993989	T	C	0.5246	7.715	1.206e-14	???--???++++++-+--++++--++?+-+--+++-?+-++++++++---?+++-+???+-????--+++--+--+	0.5775	0	276693	4.903	9.457e-07	0.4017	4.28714	2.832	0.00463	0.7499	0	4.567	4.945e-06	0.2321	30.0047	0.2321	30.0047	-0.0032537	0.0017452	0.062273
1	41801448	rs36040148	T	C	0.7736	7.714	1.215e-14	++--+++++++-++++-++-+---++-+-+---++-+---++--+++----++---++-+-++++++-++--++++	0.4737	0.186319	300486	2.719	0.006551	0.9105	0	-0.276	0.7829	0.2169	16.0463	6.414	1.414e-10	0.5041	0	0.5041	0	-0.00023496	0.0017287	0.891883
1	41808972	rs12757611	A	G	0.2261	-7.713	1.227e-14	???--???++++++?+--++++--++?+-+--+++-?+-++++++++---?+++-+???+-????---++--+-++	0.661	0	274440	4.89	1.008e-06	0.5006	0	2.811	0.004933	0.7592	0	4.605	4.118e-06	0.2605	25.1684	0.2605	25.1684	0.0002779	0.0017287	0.872284
2	156005991	rs6724928	T	C	0.5242	7.712	1.237e-14	++--+-+--+-++--+-----+++-++--++--++++-+--+-++-++-+++-?+-+++-+---+--+---?----	0.2644	8.9435	298407	-1.804	0.07125	0.3611	6.03491	-0.621	0.5348	0.4563	0.550524	-6.029	1.653e-09	0.4166	0	0.4166	0	-0.0031886	0.0017456	0.0677642
1	32093167	rs871634	C	G	0.6248	7.712	1.241e-14	+-+-+-----+-++-++-----++-+-+++-++-+-+-++---++---++-++--+--+-+------+---+--+-	0.2582	9.11735	300486	-4.169	3.061e-05	0.8279	0	0.961	0.3367	0.1304	22.6665	-4.458	8.277e-06	0.1966	35.9248	0.1966	35.9248	-0.002107	0.0017546	0.2298
3	52555957	rs9853056	T	C	0.4399	-7.71	1.262e-14	-+--------+---+++++-+++--+----+-------+--++++--+------++-------+--++--+-----	0.9759	0	300486	-2.948	0.003198	0.9651	0	-1.089	0.2761	0.7572	0	-4.536	5.746e-06	0.4695	0	0.4695	0	0.001202	0.0017441	0.490682
3	52551284	rs67409736	T	G	0.5592	7.709	1.273e-14	++-+-+--+++++++++-----++--?----+-++-+-+-----+--+-+?--------++----+-+-+-+----	0.8738	0	297483	-1.264	0.2061	0.9716	0	-1.206	0.2278	0.603	0	-6.216	5.097e-10	0.926	0	0.926	0	-0.00092556	0.0017428	0.595374
4	106240331	rs2647231	T	C	0.3754	-7.703	1.324e-14	--+--+----++-+-+-+++-++--+--+-+----+--+--+-++--+++-+-+------++---++---+--+--	0.1232	16.0783	300486	-3.634	0.000279	0.7903	0	-0.337	0.7358	0.04594	32.0944	-5.977	2.268e-09	0.03081	66.2466	0.03081	66.2466	-0.0057021	0.001736	0.00102141
16	28608230	rs743590	A	G	0.3715	-7.703	1.332e-14	-----+---+--++-+-+--+-++-+----+++--+--+--+----+-++?---+++-++++---+++-++-----	0.002687	34.1467	300049	-1.938	0.0526	0.02101	33.8624	0.496	0.6196	0.2692	12.5262	-6.209	5.343e-10	0.03617	64.8465	0.03617	64.8465	-0.0019578	0.0017368	0.259627
1	41807528	rs12047161	T	G	0.2262	-7.7	1.359e-14	+-+--+---+++-+++++-++-+++--+++--+++++----+++++-+---++++++--+--++-+--+++-+-++	0.5557	0	300486	3.771	0.0001628	0.5915	0	2.318	0.02045	0.6321	0	5.746	9.136e-09	0.04516	62.6912	0.04516	62.6912	0.00027281	0.0017287	0.874603
1	41809312	rs12046670	T	G	0.7739	7.7	1.361e-14	???+????+-++-++-?+-??--?++?++---+++-?++++----++++-?--?-++---+????++-+-+?++++	0.01898	30.2968	278163	2.513	0.01196	0.7663	0	-1.501	0.1332	0.04573	35.3188	8.04	8.989e-16	0.83	0	0.83	0	-0.00028176	0.0017286	0.870522
4	103001649	rs1813006	T	G	0.0621	-7.7	1.361e-14	+-+--+---+++-+++++--+-+++--+++--+++++----+++++-+---+++++---+--++-+--+++-+-++	0.5731	0	300486	3.827	0.0001298	0.5182	0	1.98	0.04769	0.7006	0	5.459	4.794e-08	0.05721	60.0692	0.05721	60.0692	0.0016986	0.0017154	0.322062
3	52551265	rs66824127	T	C	0.4465	-7.699	1.374e-14	+---+---?---+---++-+-+----?---+++---+-+-+--++++-+++--?----++-++----+-++?--+-	0.005084	32.6011	286769	-4.361	1.298e-05	0.01013	37.812	-2.049	0.04049	0.07604	28.7749	-3.508	0.0004507	0.412	0	0.412	0	0.001812	0.00175	0.300469
6	26441640	rs13220495	T	C	0.0972	7.699	1.376e-14	???--???++++++?+--++++--++?+-+--+++-?+-++++++++---?+++-+???+-????---++--+--+	0.6079	0	274440	4.89	1.007e-06	0.4487	0.891972	2.892	0.003826	0.7555	0	4.523	6.11e-06	0.2386	28.9268	0.2386	28.9268	-0.0043333	0.001739	0.0127087
1	41809477	rs12045979	A	G	0.7736	7.697	1.392e-14	+---+----++-+--+?-+??++?--+---++--+++-----+++-+--+-++?+-++-+-------+---?----	0.05313	22.4536	297982	-3.02	0.002531	0.4352	1.95838	1.346	0.1782	0.2526	14.8302	-7.712	1.243e-14	0.6204	0	0.6204	0	-0.00027306	0.0017286	0.874486
1	41809162	rs12028244	T	C	0.2262	-7.696	1.407e-14	+---+----++-+--+?-+??++?--+---++--++------+++-+--+-++?+-++-+-------+---?----	0.0508	22.7185	297982	-3.063	0.002188	0.4157	3.03265	1.344	0.1789	0.2515	14.9057	-7.71	1.26e-14	0.6289	0	0.6289	0	0.00033958	0.001729	0.844291
1	41794403	rs17362424	T	G	0.2233	-7.696	1.407e-14	???++???-----?+-++---+-+--?-+-++---+?----------+++?---+-???-+????++---++-+--	0.7113	0	275414	-4.549	5.378e-06	0.5638	0	-2.879	0.003988	0.7358	0	-4.64	3.485e-06	0.2909	19.7861	0.2909	19.7861	0.00016867	0.0017228	0.922007
4	106097339	rs6818637	T	C	0.3517	-7.694	1.421e-14	+--??-?+---+?--+?-????-?-?------+--?++?+-+--+-+--+---?---+-+?+---+?+-++?--+-	0.4825	0	295511	-3.123	0.001789	0.3274	8.21478	-2.098	0.03588	0.7769	0	-4.396	1.104e-05	0.1209	48.4182	0.1209	48.4182	-0.0077782	0.0017342	7.28618e-06
6	26485573	rs9348721	A	G	0.8775	-7.694	1.424e-14	++++++++++----++-+++++++++-+-++--++++-+-++++-+-+-++++++++-+-++-++++-++--++++	0.8307	0	300486	2.581	0.009838	0.8871	0	3.128	0.001758	0.676	0	4.101	4.113e-05	0.1765	39.222	0.1765	39.222	0.0038071	0.00176	0.0305351
6	98387276	rs12154193	C	G	0.4851	-7.694	1.429e-14	---+++--+-+-+-+?+++-++++------+---++---+---++-+-+-+---+-----+----------+----	0.5189	0	300127	-4.894	9.869e-07	0.5487	0	-0.809	0.4185	0.4201	2.92519	-5.353	8.636e-08	0.4693	0	0.4693	0	-0.0045201	0.0017436	0.00953235
4	106184597	rs2726459	A	C	0.4681	7.692	1.443e-14	+++-+--+-+--+--+-++---++++++++++++--++-+++---+----+-+++++--+++-+----++--++++	0.1881	12.4302	300486	3.751	0.000176	0.5906	0	0.641	0.5213	0.04258	32.6433	5.709	1.134e-08	0.6864	0	0.6864	0	0.0049456	0.0017532	0.00478961
3	52566065	rs4282054	T	C	0.4431	-7.687	1.509e-14	+--+++-++-++-+---++++--+------+-+-+++------------+-++++--+---+-+--++--++--+-	0.7396	0	300486	-4.84	1.297e-06	0.3963	4.10204	-0.163	0.8709	0.9122	0	-4.446	8.731e-06	0.839	0	0.839	0	0.0010188	0.001744	0.559114
6	26488860	rs16891727	A	C	0.1223	7.683	1.557e-14	???++???--------++----++--?-+-++---+?-+--------+++??--+-???-+????+++--++-+--	0.6819	0	275139	-4.672	2.986e-06	0.5249	0	-2.785	0.005349	0.7449	0	-4.612	3.986e-06	0.2603	25.2057	0.2603	25.2057	-0.0038429	0.0017601	0.0290135
1	32097088	rs10798880	T	G	0.6212	7.678	1.61e-14	+++++-+-++-+--+-++--+---+-++++-+-+--+++++---+++---+++-+++-+++++-+--++--+++++	0.238	10.0309	300486	4.944	7.639e-07	0.7366	0	-0.053	0.958	0.09347	26.1375	7.133	9.797e-13	0.6263	0	0.6263	0	-0.0020618	0.001754	0.239795
4	106171635	rs2647246	T	G	0.4503	7.677	1.633e-14	+-+---++-+--++-?---+--+--+-++-++++--+++-+++--+--+--++-+++-++-+++++-++++-++++	0.7223	0	300127	4.924	8.484e-07	0.5033	0	0.422	0.6732	0.8461	0	4.914	8.902e-07	0.4395	0	0.4395	0	0.0043713	0.0017479	0.012388
4	103112470	rs6855246	A	G	0.9168	7.676	1.644e-14	---++----++-------+--++++-+--+++++-+--+---+-+-+++--+-----+--+---++++-+-+----	0.1102	16.9242	300486	-3.049	0.002293	0.01483	35.342	-0.224	0.8224	0.7562	0	-5.168	2.365e-07	0.7886	0	0.7886	0	-0.0031594	0.0017875	0.0771436
3	49924940	rs1062633	T	C	0.4925	7.674	1.669e-14	-+++++-++++-+-+++-+----++++++-++++++-+-++++--++-+-+++++++++-+++++---++++++++	0.1002	17.625	300486	4.683	2.83e-06	0.254	12.0744	0.691	0.4894	0.3078	10.0315	7.55	4.358e-14	0.05914	59.672	0.05914	59.672	0.0047728	0.0017503	0.00639588
6	98390906	rs11154000	A	G	0.5151	7.673	1.681e-14	??++-+-++++-+--++-++---++++++-++-+++-+-++++-----+-++++-++++-+++++---++++++++	0.2146	11.2548	299093	4.084	4.428e-05	0.2552	12.2503	-0.245	0.8065	0.6618	0	7.062	1.641e-12	0.209	33.877	0.209	33.877	0.0045229	0.0017436	0.00948637
4	106178902	rs7678440	A	G	0.4628	7.671	1.708e-14	--++-+-++-++++-++++-+-+++++++-+++++-----++--+-++-+++---++-+++++++---+++-++++	0.7119	0	300486	3.885	0.0001021	0.7209	0	-0.173	0.8626	0.6103	0	4.461	8.141e-06	0.4827	0	0.4827	0	0.0046264	0.001747	0.00809282
6	26588521	rs34229567	T	C	0.1238	7.671	1.71e-14	++++++-++++---+--+--++-++---+--++++----+--+--+-+-+++++++++--+---+---+-+-++++	0.1724	13.2436	300486	5.157	2.508e-07	0.3673	5.69596	-1.266	0.2056	0.5477	0	4.983	6.261e-07	0.2694	23.6058	0.2694	23.6058	-0.0038534	0.0017656	0.0290737
4	106261006	rs2726482	A	G	0.4177	7.668	1.746e-14	---+-++-+-+--++-+--+++------------++--+---+++-++++-+-----++---+-++++--++----	0.1986	11.9046	300486	-3.718	0.0002012	0.624	0	-0.6	0.5482	0.04232	32.6871	-5.751	8.892e-09	0.6831	0	0.6831	0	0.0034098	0.0017435	0.050501
6	98385908	rs4463263	T	C	0.5152	7.667	1.757e-14	+++----++-+-++-------+-+++++-+---++-+++-++---++---+-++++-++++-+++--+++++++++	0.0003372	39.414	300486	4.424	9.696e-06	0.07725	24.9967	-1.102	0.2703	0.00393	45.063	5.23	1.699e-07	0.09069	53.6608	0.09069	53.6608	0.0045177	0.0017436	0.00957194
2	156032476	rs13416433	T	C	0.5243	7.667	1.763e-14	+-+-+-++-+--+++-+---+-+-++-++++-++---+++-----0--+-?--++++--+-+-++---+-++++-+	0.09225	18.3115	300049	3.405	0.0006606	0.5392	0	-0.896	0.3701	0.2462	14.0426	7.071	1.535e-12	0.1327	46.4381	0.1327	46.4381	-0.0032432	0.0017455	0.0631539
4	106237555	rs2955171	A	G	0.6246	7.666	1.771e-14	???++???------??+?----++--??+-++--++?----------+++?---+-????+????+++--++-+--	0.7176	0	267024	-4.157	3.22e-05	0.5471	0	-2.831	0.004648	0.7476	0	-4.474	7.687e-06	0.2874	20.4244	0.2874	20.4244	0.0056435	0.0017359	0.00114974
6	98391101	rs9387925	A	G	0.515	7.665	1.784e-14	???+-???++++-?+-?+-??---+-?+---+++--?-+-+----++++-?--?--???++????+++--+?++++	0.005105	36.2621	273057	2.343	0.01915	0.06028	33.0403	-1.5	0.1336	0.08198	29.2866	5.948	2.709e-09	0.8779	0	0.8779	0	0.0045287	0.0017436	0.00939723
2	155986195	rs6744254	T	C	0.5281	7.665	1.785e-14	+---+++++++-++++++---?+-+++++----+--+--+-+--++-+--++---++--+++-+?+-++---++-+	0.1988	12.0323	299667	4.677	2.917e-06	0.6328	0	0.34	0.7339	0.07189	28.8972	3.861	0.0001128	0.3641	5.77889	0.3641	5.77889	-0.0030156	0.0017455	0.0840621
6	98390318	rs9490127	A	T	0.515	7.663	1.813e-14	+--??-?+--++?--+?+????+?+?--------+?+++-----+-+--+?--?-----+?+--+??+-++?--+-	0.2714	9.57835	294985	-2.402	0.0163	0.2985	10.0234	-1.607	0.1081	0.2458	17.3835	-4.794	1.637e-06	0.502	0	0.502	0	0.0045275	0.0017436	0.00941673
1	32083193	rs11807225	C	G	0.6196	7.662	1.829e-14	???+????+-++-++-?+-??--?++?++---+++-?++++----++++-?--?-++---+????++-+-+?++++	0.01653	30.9522	278163	2.515	0.01189	0.7636	0	-1.436	0.151	0.03905	36.522	8.14	3.938e-16	0.8294	0	0.8294	0	-0.0022424	0.0017523	0.20065
16	28599411	rs55792032	A	G	0.6285	7.66	1.865e-14	--+-++-+++++-+----+-+-+-+-++-+-+++----++++++++------++-+++++-----++++++-++++	0.3586	4.867	300486	1.874	0.06096	0.7767	0	1.218	0.2231	0.1687	19.5581	6.181	6.375e-10	0.4717	0	0.4717	0	0.0020039	0.0017372	0.248708
4	106271522	rs2726490	T	C	0.5952	7.653	1.957e-14	---+-+-++++-+++++++-++-++-+++--+++++-+--++-+++--++++++--+----+-++++-+++-++++	0.3777	4.08594	300486	4.747	2.067e-06	0.2748	10.8675	0.154	0.8774	0.496	0	5.103	3.345e-07	0.9947	0	0.9947	0	0.0051146	0.0017387	0.00326437
16	28595700	rs17640009	A	G	0.6286	7.653	1.96e-14	-+-++-+++---+--+--+--+---++---++-----+-++-----+-+++-----+++-++--+-++---+-+--	0.5873	0	300486	-3.677	0.0002357	0.5747	0	-2.102	0.03552	0.689	0	-5.561	2.686e-08	0.04797	62.0589	0.04797	62.0589	0.0019992	0.0017373	0.249822
2	155731956	rs2652430	A	G	0.4683	-7.652	1.971e-14	-+-+-+-++++---+-?+-++---++-++--+++---++++++----++++++?++-----+++-+--+++?++++	0.03685	24.1003	298327	3.309	0.0009374	0.02198	33.3067	-0.18	0.8573	0.5699	0	6.393	1.628e-10	0.3611	6.39626	0.3611	6.39626	0.0026741	0.0017467	0.125791
20	47602832	rs6019573	T	G	0.3215	7.652	1.985e-14	+-++---+++-+-+-+--+--++-+-+-+-+-++++-+++-++--++-+-++0-+++-++-+++++-++++-++++	0.4819	0	300486	2.527	0.01152	0.5827	0	1.207	0.2276	0.3787	5.54454	5.533	3.144e-08	0.3738	3.78448	0.3738	3.78448	0.0082998	0.0017402	1.84672e-06
3	49924424	rs11713193	A	G	0.5042	-7.65	2.015e-14	---------+++++-+-+--+-+--+--------+-+-+--+----+-+-----+++-+++----+++-+------	0.006288	31.2072	300486	-2.719	0.006542	0.6277	0	-0.635	0.5254	0.001624	48.2196	-7.443	9.86e-14	0.1258	47.5891	0.1258	47.5891	-0.0046383	0.0017487	0.00799098
3	52558008	rs13303	T	C	0.4402	-7.646	2.066e-14	???++???--------++----++--?-+-++---+?-+--------+++?---+-???-+????+++--++-+--	0.6201	0	276693	-4.854	1.208e-06	0.4649	0	-2.837	0.004553	0.7324	0	-4.552	5.325e-06	0.266	24.2041	0.266	24.2041	0.00086936	0.0017444	0.61823
2	156056671	rs13416523	T	C	0.5242	7.646	2.072e-14	???+????+-++-++-?+-??--?++?++---++--?+++++---++++-?--?-++---+????++-+-+?++++	0.01317	31.982	278163	2.374	0.0176	0.8272	0	-1.521	0.1283	0.02171	40.4808	7.934	2.117e-15	0.7934	0	0.7934	0	-0.0032741	0.0017449	0.0606178
16	28594549	rs4788073	A	G	0.6282	7.646	2.08e-14	+++----+-++-----+-+-+-++-++---+--------+---+-+-++-?+--+-+--+-+----+--+-+--+-	0.2867	7.91553	300049	-1.762	0.07811	0.518	0	-0.68	0.4965	0.427	2.48976	-6.584	4.581e-11	0.4127	0	0.4127	0	0.0020296	0.0017373	0.242706
2	156058804	rs12468215	C	G	0.5241	7.643	2.123e-14	???++???------+-++----++--?-+-++---+?-+--------+++?---+-???-+????+++--++-+--	0.6441	0	276693	-4.846	1.26e-06	0.4723	0	-2.843	0.004471	0.7462	0	-4.632	3.628e-06	0.2749	22.6605	0.2749	22.6605	-0.0032657	0.0017454	0.0613479
3	49902544	rs9821675	A	G	0.5042	7.642	2.134e-14	----------++++--+---------+-+--++-++-+-++---+-+-+--------+++--+-+--+--++----	0.8737	0	300486	-2.626	0.008639	0.9136	0	-3.455	0.0005506	0.7138	0	-3.876	0.0001062	0.3001	18.1223	0.3001	18.1223	0.0046149	0.0017491	0.00832914
16	28595810	rs75539558	C	G	0.6285	7.64	2.175e-14	+-----++-++--++--+-+--+++++-+--+---+--------+---+++++---------+--+-+--++----	0.1799	12.8464	300486	-1.857	0.06329	0.218	14.2477	-2.393	0.01671	0.2649	12.8059	-5.117	3.112e-07	0.711	0	0.711	0	0.0019991	0.0017373	0.249868
4	106270884	rs2726489	A	G	0.4048	-7.64	2.18e-14	+++-+-+----+-------+--+--+---++-----+-++--+---++------++-++++-+-+--+---+----	0.2524	9.37432	300486	-4.38	1.187e-05	0.1059	22.2622	-0.43	0.667	0.5404	0	-5.288	1.238e-07	0.9817	0	0.9817	0	-0.0051287	0.0017387	0.00318053
4	106221518	rs2726523	T	G	0.6242	7.639	2.182e-14	++---+--++-+++++-+-+++--+-++++-+++--++--++--++---+-++++-+-+++-+++-+-+++-++-+	0.4171	2.48849	300486	4.81	1.507e-06	0.3732	5.37248	-0.067	0.9463	0.8668	0	5.136	2.805e-07	0.04175	63.4859	0.04175	63.4859	0.0057365	0.0017359	0.000951481
17	57095212	rs74370218	T	C	0.3729	-7.638	2.207e-14	+++++--+-++++++++-+-+--++-+++---++--++-+-++--++-+--+-+++-+-++--+-+--++--++++	0.04845	22.2282	300486	1.888	0.05905	0.0711	25.6602	0.748	0.4546	0.2979	10.6664	5.765	8.185e-09	0.2994	18.2561	0.2994	18.2561	0.0057505	0.0017422	0.000964273
6	26590578	rs13203358	A	T	0.8758	-7.638	2.209e-14	???--???++++++++--++++--++?+-+--+++-?+-++++++++---?+++-+???+-????---++--+-++	0.6735	0	276693	4.809	1.514e-06	0.5304	0	2.814	0.004897	0.7419	0	4.608	4.064e-06	0.2594	25.3546	0.2594	25.3546	0.0038212	0.0017656	0.0304439
12	79592680	rs6539284	T	C	0.5827	-7.636	2.245e-14	???++-+?-+-++??+-?-+-+--++??-+---++-+++++-+-+----+?+---++-+??????---+--+++++	0.03744	25.9956	272449	3.387	0.0007055	0.8721	0	-2.152	0.03138	0.04324	32.5342	5.905	3.535e-09	0.6893	0	0.6893	0	0.0030794	0.0017437	0.0773927
3	52566914	rs7614981	A	C	0.5296	7.632	2.316e-14	-++++-++++++-++------++++++++---++++++--++-++-----?-------+++++++++-+++-+++-	0.1082	17.1574	300049	6.22	4.969e-10	0.4425	1.55244	-1.244	0.2135	0.568	0	3.05	0.002286	0.2925	19.5063	0.2925	19.5063	-0.0010352	0.0017462	0.553299
2	156091492	rs1484974	A	C	0.4759	-7.631	2.325e-14	-+-+------+-++--+-+---+--++---+-+-++--+-+--+--+-++-+-++--+---+----++--++----	0.1214	16.1889	300486	-4.551	5.342e-06	0.5836	0	-1.565	0.1176	0.009772	41.1615	-5.16	2.471e-07	0.8907	0	0.8907	0	0.0033555	0.0017441	0.0543626
16	28587389	rs7186573	T	C	0.6283	7.629	2.358e-14	+++----++-----++-+----+-++++-+--+++++++-++-++++++-++++-+-+++++-++++-+++-+-++	0.5296	0	300486	4.768	1.863e-06	0.3946	4.19621	1.041	0.2978	0.6052	0	3.414	0.0006409	0.7171	0	0.7171	0	0.0020267	0.0017372	0.243332
6	108864419	rs9384679	T	C	0.379	-7.629	2.364e-14	++++--++-+++-++---+--++-++++++++++-+-++-+++--++++++--+----+++-+++---+-+-++++	0.1552	14.1768	300486	2.962	0.003057	0.1204	21.0407	2.105	0.03528	0.2886	11.2636	4.184	2.863e-05	0.4628	0	0.4628	0	0.010998	0.0017575	3.91832e-10
3	49960388	rs62262093	T	C	0.4955	7.627	2.405e-14	-++-+--+++++-+-+-+++++--++++-+--+-+--++++++-+++---++++-+-+++-++-----++--+-++	0.7371	0	300486	4.31	1.63e-05	0.7455	0	2.534	0.01129	0.7158	0	3.357	0.0007889	0.1377	45.6128	0.1377	45.6128	0.0046984	0.0017487	0.00721274
17	56585872	rs3744108	C	G	0.3749	-7.627	2.406e-14	???--???-+-+-++?-?++-++---??++------?-+-?--+++++-+?--------??????-++--+-----	0.2446	11.0066	270934	-1.569	0.1166	0.9395	0	0.049	0.9611	0.1789	18.7894	-6.99	2.753e-12	0.4412	0	0.4412	0	0.0054792	0.0017417	0.00165615
6	98537134	rs7773141	A	G	0.4946	7.626	2.417e-14	++--+--+-+--+--+++++--+-++++++++++--++-+++---+-+--++++++++-+++-++---+---++-+	0.5884	0	300486	3.471	0.0005182	0.7356	0	0.591	0.5546	0.2374	14.6394	4.466	7.981e-06	0.7301	0	0.7301	0	0.0045552	0.0017418	0.00891661
1	41820949	rs12024263	A	G	0.774	7.625	2.434e-14	-+++?+++++-+-++-?+-??--?++-++---++---++++----+-++-+--?-++----+++++--+++?++++	0.01417	29.2072	297876	3.235	0.001217	0.2147	14.4477	-1.347	0.1779	0.1428	23.9242	7.579	3.485e-14	0.5787	0	0.5787	0	-0.00051247	0.0017283	0.766832
2	156072466	rs7576276	A	T	0.5241	7.624	2.467e-14	++--?-------+--+?-+?++++-++---++--++++-+-++-+++-++?---+-+-++--+-+------?----	0.1986	12.2587	299592	-2.129	0.03328	0.334	7.60045	0.459	0.6459	0.359	7.10636	-6	1.974e-09	0.9146	0	0.9146	0	-0.0032551	0.0017452	0.0621584
16	28590862	rs112047757	T	C	0.3719	-7.621	2.527e-14	+-++--+-+++++-+-++-++----+++++++++++++-+++-+++++++--+-+-+++++++++-++++-+++++	0.7542	0	300486	4.153	3.283e-05	0.9076	0	2.721	0.0065	0.2338	14.8815	5.767	8.05e-09	0.595	0	0.595	0	-0.0020109	0.001737	0.24699
6	27586220	rs67652222	T	C	0.1051	7.619	2.55e-14	----+++++--+-+----+---++-+----+-+--+--++++--+----+?+--+-+--+----+-+---+?----	0.4275	2.08177	299873	-2.475	0.01332	0.4045	3.67278	-0.098	0.9216	0.5778	0	-5.699	1.202e-08	0.6066	0	0.6066	0	-0.0040321	0.0017391	0.0204221
20	47572282	rs1983639	A	G	0.3225	7.618	2.584e-14	???--???+++++?-?-?+++-+-++?+-+--+++-?++++++++++---?+++-+???+-????--+++--+-++	0.7228	0	273538	4.426	9.612e-06	0.5938	0	2.919	0.003513	0.7318	0	4.635	3.573e-06	0.2731	22.9782	0.2731	22.9782	0.0083374	0.0017447	1.76441e-06
1	32086912	rs2280386	A	C	0.3793	-7.617	2.605e-14	???++++?-----?+-++---+-+--?-+-++---+?----------+++?---+-???-+????++---++-+--	0.6818	0	275952	-4.365	1.27e-05	0.5237	0	-2.843	0.004463	0.7273	0	-4.611	4.011e-06	0.2657	24.2616	0.2657	24.2616	0.0023044	0.0017537	0.188847
16	28898793	rs6565259	T	C	0.6366	7.616	2.609e-14	-++--++-+++++-+++-++++-++++-+-+++++---++++--+++-+++-++-++++--+-++-+-++--++++	0.003968	32.7577	300486	1.878	0.06035	0.005296	39.865	0.901	0.3674	0.1332	22.4285	5.898	3.672e-09	0.8531	0	0.8531	0	0.0020924	0.0017418	0.229636
6	98323549	rs79245415	C	G	0.8738	-7.616	2.614e-14	-+++++-++-+-++--+-++-+-+-+----+-+--+-+------+-++-+--+---+-++-+++-++--++-----	0.145	14.7582	300486	-1.112	0.2661	0.2944	9.74729	-1.609	0.1075	0.2857	11.4496	-5.926	3.11e-09	0.6126	0	0.6126	0	-0.0004247	0.0017107	0.803928
20	47675176	rs2064853	A	T	0.5834	7.616	2.624e-14	???--???+++++?-+--+++-+-++?+-+--+++-?++++++++++---?+++-+???+-????--+++--+-++	0.6795	0	275414	4.428	9.518e-06	0.5522	0	2.818	0.004828	0.6943	0	4.633	3.61e-06	0.2761	22.4405	0.2761	22.4405	0.0078721	0.0017409	6.13056e-06
16	28603655	rs1059491	T	G	0.6393	7.615	2.63e-14	-+++++-++++-+-+++-+----++++++-++++++-+-++0+--++-+-+++++++++-+++-+---++++++++	0.1604	13.8901	300486	4.895	9.808e-07	0.3101	8.86307	0.671	0.5021	0.3753	5.76114	7.394	1.421e-13	0.07198	57.1245	0.07198	57.1245	0.0019549	0.0017359	0.260112
4	106075498	rs2189234	T	G	0.3786	-7.615	2.636e-14	+--------++-----+---++---++-----+---+-++-+---+++------+------------+-++---+-	0.8764	0	300486	-3.791	0.0001502	0.7279	0	-1.146	0.2516	0.9523	0	-5.715	1.096e-08	0.06104	59.2834	0.06104	59.2834	-0.008242	0.0017386	2.13255e-06
6	26598004	rs4634439	A	G	0.8756	-7.614	2.655e-14	-----++-----+--+-----+--+-----+-+-++--++-++-+--+++?-+-------+---++++---+----	0.05091	22.0683	300049	-4.067	4.762e-05	0.3773	5.19023	0.523	0.6012	0.02853	35.3253	-5.26	1.444e-07	0.694	0	0.694	0	0.0038267	0.0017662	0.0302622
20	47561091	rs6019547	A	G	0.3221	7.614	2.663e-14	---+++-----++--?+-++-+-++-------++++-+----++--++++----+--++++-----+----+----	0.0512	22.0363	300127	-3.597	0.0003218	0.2101	14.888	-1.5	0.1337	0.01898	37.7438	-4.567	4.956e-06	0.8412	0	0.8412	0	0.008305	0.0017431	1.89322e-06
6	27797416	rs71559050	A	C	0.1058	7.611	2.714e-14	-++-+-++++++--+++-+----++++++--+-++-+++-++--+++++--++---++-+-++++---++--++++	0.4996	0	300486	3.022	0.002513	0.6807	0	-0.338	0.7355	0.3192	9.30528	5.351	8.757e-08	0.8956	0	0.8956	0	-0.0039836	0.0017385	0.0219381
17	56584205	rs2302189	A	C	0.6238	7.611	2.715e-14	-+---+---+-----+-+--+-++-+----+-+-+++------+--+-++----+-+-+++--+--++-+------	0.1677	13.4928	300486	-3.759	0.0001704	0.418	2.90791	0.065	0.9484	0.4638	0.123181	-6.175	6.617e-10	0.01876	69.9308	0.01876	69.9308	-0.0053739	0.001742	0.0020361
6	98539872	rs9388109	T	C	0.5063	-7.61	2.735e-14	-+-++-++-+-++--+++++++-+--+++-+-+-++--+-+--------++++-+----++-+-++-++-+-----	0.05056	21.9871	300486	-0.342	0.7321	0.3482	6.74252	-1.838	0.0661	0.1853	18.314	-6.375	1.835e-10	0.435	0	0.435	0	-0.0045324	0.0017427	0.00930251
3	49949834	rs7634084	A	T	0.4954	7.604	2.864e-14	--++--++++++++-+++++---+--+-+-++-+--+++-++--+-++--++++++++-+-+++---++---+-++	0.4781	0.00533305	300486	3.604	0.0003129	0.6432	0	0.043	0.966	0.2988	10.6052	4.618	3.879e-06	0.4803	0	0.4803	0	0.004687	0.0017487	0.00735529
17	57097390	rs2158966	A	G	0.372	-7.603	2.903e-14	???++++?-----?+-++----++--?-+-++---+?------+---+++?---+-???-+????++---++-++-	0.6318	0	275952	-4.459	8.222e-06	0.464	0	-2.752	0.005924	0.7157	0	-4.611	4.008e-06	0.2519	26.6504	0.2519	26.6504	0.0055631	0.0017419	0.00140475
2	155671807	rs2652456	C	G	0.5323	7.602	2.912e-14	+--+--+--+-----+----++++-+-?--+-+--++-+--+-+-+++++---------++---?+-+-++-----	0.1258	16.0939	295410	-4.644	3.417e-06	0.3095	9.07133	-0.502	0.616	0.2044	16.9274	-5.106	3.284e-07	0.09309	53.2346	0.09309	53.2346	-0.0024889	0.0017491	0.154753
17	56550804	rs2531734	T	C	0.6246	7.602	2.918e-14	-----+----+++----+++-+-+------+-+-+++-+---+++--+++-+0+---+--++--++++-++--+--	0.004324	32.4774	300486	-4.127	3.68e-05	0.1354	19.859	0.014	0.9885	0.01161	40.327	-5.773	7.808e-09	0.09362	53.1396	0.09362	53.1396	-0.0052964	0.0017416	0.00235776
20	47602339	rs1997854	A	G	0.6774	-7.602	2.925e-14	++-+++-++++++++-++++++-+++-++-+-+-+-+--+++--+++----++---++++-+-++++---+-++++	0.1823	12.7227	300486	2.133	0.03294	0.8142	0	-0.402	0.6874	0.2963	10.7674	7.695	1.413e-14	0.2442	27.9712	0.2442	27.9712	-0.0083637	0.0017447	1.63719e-06
16	28545449	rs4788083	A	G	0.5892	7.599	2.981e-14	+-++++-+--+--++-++++--+--++-+0++++-+-+-++++-++-+++?+-+--+++-++----+--++0++++	0.1348	15.445	300049	1.771	0.07652	0.1898	16.2029	2.332	0.01972	0.2916	11.0716	5.928	3.061e-09	0.6528	0	0.6528	0	0.0022642	0.0017387	0.192837
16	28582941	rs12447461	A	C	0.3721	-7.598	3.004e-14	+++-+-+++-++++--+-++-+--+-++++++-+---+-++++-+--+--++++++++---++-++--+-++++++	0.1285	15.7445	300486	3.562	0.0003675	0.4031	3.72813	0.076	0.9392	0.3324	8.46403	6.667	2.604e-11	0.03838	64.2985	0.03838	64.2985	-0.0019999	0.0017374	0.249707
1	32082486	rs3753611	T	C	0.6197	7.597	3.037e-14	+++--++++++++-+++-----+-+-++++++++-++++-+--++-+-+--++---+++-++++-+-++++-++-+	0.2026	11.7076	300486	4.926	8.385e-07	0.5484	0	-0.092	0.9265	0.1635	19.9659	4.561	5.087e-06	0.2551	26.0902	0.2551	26.0902	-0.0023411	0.0017519	0.181447
20	47697732	rs2426121	A	C	0.6774	-7.596	3.048e-14	+-+++-+++-+++++-+-++-+--+-++++-+-+---++++++-++-+--++++-+-+---++-++--+-++++++	0.1556	14.1523	300486	3.715	0.0002032	0.3859	4.67339	-0.074	0.9407	0.4725	0	6.173	6.691e-10	0.0187	69.9519	0.0187	69.9519	-0.0083499	0.001745	1.71041e-06
1	32135773	rs2292989	A	G	0.6437	7.596	3.057e-14	???++++?-----?+-++---+-+--?-+-++---+?----------+++----+-???-+???-++---++-+--	0.7155	0	277116	-4.377	1.201e-05	0.6204	0	-2.818	0.004831	0.6823	0	-4.604	4.14e-06	0.289	20.1278	0.289	20.1278	-0.0032924	0.0017386	0.058264
4	106270291	rs2647266	A	G	0.5938	7.595	3.069e-14	???++++?-----?+-++---+++--?-+-++---+?-+----+---+++----+-???-+???-++---++-+--	0.8079	0	277116	-4.145	3.398e-05	0.7336	0	-3.034	0.002416	0.7155	0	-4.535	5.75e-06	0.353	8.00368	0.353	8.00368	0.0051949	0.0017388	0.00281125
20	47598298	rs6090932	A	C	0.6776	-7.595	3.075e-14	++++-+++?+++-+++?-+-+--+++++++--++++++++-++----+---++?++++--+--++++-+--?++++	0.002428	34.9781	289255	4.619	3.858e-06	0.004057	41.2341	2.11	0.03486	0.0629	30.8313	3.513	0.0004431	0.7457	0	0.7457	0	-0.0083597	0.0017447	1.65653e-06
20	47601509	rs1569749	A	G	0.6772	-7.595	3.08e-14	???+++-?+++-+--++?+-+---++??+-++++++?+-+++0---+-+-+++++++++-++??+---++++++++	0.5244	0	278388	3.17	0.001525	0.8637	0	-0.026	0.979	0.3935	4.61049	6.781	1.195e-11	0.314	15.5643	0.314	15.5643	-0.008363	0.0017452	1.6512e-06
4	106220934	rs2726525	A	G	0.3761	-7.594	3.095e-14	++++-++++++---++-+---+++++-+---+++++++-++-+--+----?+-++++---+--++-+++++-+-+-	0.05531	21.5877	300049	5.725	1.032e-08	0.5162	0	-0.02	0.9838	0.1664	19.7346	4.391	1.127e-05	0.008526	74.337	0.008526	74.337	-0.0057688	0.0017358	0.000889201
17	56631907	rs8081906	A	T	0.6704	7.594	3.114e-14	-+-+++++--+-++-+--+-+++++--+----+--+--+-+-+++-+++-+++--++-++---+----+-------	0.193	12.1821	300486	-1.256	0.2093	0.3535	6.45244	-1.056	0.2909	0.2785	11.9124	-6.001	1.957e-09	0.8903	0	0.8903	0	-0.0056577	0.0017419	0.00116252
17	57076893	rs4598970	A	T	0.3708	-7.591	3.176e-14	???-+-??++++++??-?++++--++?+-+--++--?+-++++-+++---?+++-+?????????---++-++-++	0.6539	0	271532	3.751	0.000176	0.5352	0	2.678	0.007405	0.6589	0	4.295	1.744e-05	0.2526	26.5426	0.2526	26.5426	0.0057087	0.0017422	0.00105051
20	47583480	rs6019558	A	C	0.3226	7.59	3.192e-14	---+++--+-+++-+?++++++-++-------+-++-+-+--0++-++++----+-+++-+---------++----	0.1141	16.7567	300127	-3.562	0.0003687	0.1644	17.9258	-1.101	0.2707	0.09086	26.4093	-4.75	2.035e-06	0.9898	0	0.9898	0	0.0083523	0.0017447	1.69122e-06
17	56533235	rs2632508	A	G	0.625	7.59	3.208e-14	++------+++---+-++-+++--+-++-+---++-+++------++-+-++++-+-+---+++-+--++-?++++	0.2164	11.1004	300310	3.479	0.0005039	0.1919	15.8992	1.272	0.2034	0.2385	14.756	5.737	9.64e-09	0.9394	0	0.9394	0	-0.0052583	0.0017414	0.00253105
16	28917746	rs62037412	A	G	0.3532	7.59	3.21e-14	--++-+-++-++-+--++--++-+-+-+----+++-++-+++-+-++++-?+-+--+-+++-+++-+-+--+++-+	0.4072	2.90116	300049	2.737	0.006207	0.4745	0	1.966	0.04927	0.2817	11.7076	4.983	6.254e-07	0.5022	0	0.5022	0	-0.0029489	0.0017352	0.0892278
16	28543381	rs12446550	A	G	0.4092	-7.588	3.239e-14	???--???++++++?+--++++--++?+-+--+++-?+-++++++++---?+++-+???+-????---++--+-++	0.623	0	274440	4.933	8.104e-07	0.4734	0	2.809	0.004967	0.7381	0	4.597	4.279e-06	0.2572	25.7426	0.2572	25.7426	-0.0023125	0.0017393	0.183671
3	52542919	rs1010554	T	C	0.5242	7.587	3.266e-14	++++++++++--+++-+++-+--++-+++--+++--++-++++--+----+---++++++--++---++--+++++	0.07274	19.7938	300486	6.459	1.052e-10	0.3666	5.7293	-0.08	0.9363	0.1328	22.4646	8.071	6.963e-16	0.4261	0	0.4261	0	-0.0010551	0.0017496	0.546487
16	28537971	rs2106480	T	C	0.5885	7.586	3.298e-14	-++---+---++---+--++--+--+----------+--+-++-+-+-+--++-++---++-+-++++---+--+-	0.3831	3.86711	300486	-4.935	8.02e-07	0.1856	16.3127	-0.343	0.7315	0.7194	0	-5.13	2.89e-07	0.6536	0	0.6536	0	0.0022796	0.0017388	0.189841
17	56548420	rs2531732	A	T	0.3753	-7.586	3.299e-14	---+-++-+-++-++-+---++------------++--+---+++-++++-+-----++---+-++++--++----	0.1746	13.1271	300486	-3.759	0.0001709	0.5111	0	-0.7	0.4841	0.053	31.0202	-5.787	7.163e-09	0.6788	0	0.6788	0	0.0052608	0.0017416	0.0025229
20	47646932	rs6019600	T	C	0.3221	7.586	3.305e-14	???++???++?+-?+-??-?+---++?+?--++++-?++-+----+++--??-?--???--????++-+-+?++++	0.08818	21.8677	268059	3.327	0.0008764	0.4479	0.793651	-2.319	0.02037	0.4838	0	6.162	7.164e-10	0.8649	0	0.8649	0	0.0083157	0.0017433	1.8412e-06
6	28800344	rs9257245	A	C	0.892	-7.585	3.318e-14	-++++-++++++-+++-----+++++-++-+-++++++-+++-++-------++----++++++++--+++-++++	0.08295	18.9347	300486	5.274	1.337e-07	0.2879	10.1164	-0.033	0.9734	0.1561	20.5466	3.204	0.001354	0.4302	0	0.4302	0	0.0030332	0.0017503	0.0830998
20	47582884	rs2295027	A	G	0.3231	7.585	3.327e-14	+--++-+---+---++--++-++---+----+-++-?-----+++--++-++--+---+----+-+++---+----	0.1385	15.2222	298560	-2.552	0.01071	0.1687	17.6294	-0.464	0.6429	0.5009	0	-6.925	4.368e-12	0.428	0	0.428	0	0.0083679	0.0017447	1.61734e-06
12	79584218	rs1918202	A	G	0.5836	-7.584	3.339e-14	???++???-----?+-++---+-+--?-+-++---+?----------+++?---+-???-+????++---++-+--	0.6597	0	275414	-4.493	7.039e-06	0.5176	0	-2.884	0.003923	0.7067	0	-4.613	3.971e-06	0.2747	22.6804	0.2747	22.6804	0.003168	0.0017442	0.0693266
17	56539890	rs2531729	T	C	0.6246	7.584	3.351e-14	---+++----+++-+?+++-++++-----+--+-++---+---++-+++++---+-----+-----+----+----	0.5608	0	300127	-4.524	6.078e-06	0.5085	0	-0.573	0.5664	0.4985	0	-5.227	1.721e-07	0.629	0	0.629	0	-0.005282	0.0017416	0.00242214
17	57075299	rs3826353	A	G	0.6265	7.584	3.351e-14	-----+---++--------++-+---+--++---+---+--+--++-++++---+----+-+--++-+-+---+--	0.7752	0	300486	-4.674	2.957e-06	0.7527	0	0.658	0.5103	0.8966	0	-4.943	7.686e-07	0.2566	25.8344	0.2566	25.8344	-0.0058803	0.0017417	0.000735191
6	26603015	rs9379899	A	T	0.1242	7.584	3.363e-14	++?--?+-?+--++???+-+??--+-??++-++++-?+--+++-++--+-?+++-++????+++?-+---+-++++	0.3835	4.23354	270580	2.666	0.007668	0.5729	0	1.028	0.3041	0.1566	21.3562	4.787	1.696e-06	0.6897	0	0.6897	0	-0.0037997	0.0017658	0.0314123
6	26602453	rs28360517	A	G	0.8756	-7.583	3.38e-14	--+---+--+-----++----+++--+-+-+++--+-+-----+---++++--+++-----------+--++----	0.4529	1.03583	300486	-2.958	0.003098	0.5783	0	0.105	0.9168	0.6284	0	-6.586	4.523e-11	0.3259	13.2948	0.3259	13.2948	0.0037347	0.0017662	0.0344747
2	156067949	rs6435611	A	G	0.4766	-7.583	3.389e-14	++++-----++-++++++-+++--+-++++-+-++-++----++-++++-?-++-+-++-++++-+-+++-?++++	0.4402	1.56286	299873	2.578	0.009937	0.4044	3.6823	0.145	0.885	0.5672	0	5.656	1.55e-08	0.6374	0	0.6374	0	0.0032651	0.0017452	0.0613621
17	56593111	rs4793950	T	C	0.6237	7.582	3.396e-14	???-+???--?-+??-----+--+--?---++++-+?------++-+---?---+-???-+????+++--+-----	0.1092	19.1873	272264	-2.886	0.003906	0.2774	13.4574	-2.262	0.02368	0.06938	29.2044	-4.991	6.001e-07	0.4697	0	0.4697	0	-0.0054153	0.0017415	0.0018737
4	106249102	rs2726475	A	G	0.4163	7.582	3.399e-14	---+-++-+++-+-++---+--++++--+-+++-----+-+---++--++-++--+-+-+-----+----------	0.06774	20.2442	300486	-2.058	0.03955	0.3806	4.96329	-0.765	0.4445	0.1039	25.0899	-7.01	2.388e-12	0.435	0	0.435	0	0.0037132	0.0017437	0.03322
4	106219352	rs11097884	C	G	0.4038	-7.582	3.415e-14	---+-+-++-+--+-----++++-----------+-------+++-+-++---+----+---+--++----+-+--	0.2717	8.51985	300486	-4.437	9.103e-06	0.6918	0	-0.959	0.3373	0.09134	26.3587	-6.473	9.602e-11	0.2631	24.7177	0.2631	24.7177	-0.0058004	0.0017369	0.000839653
2	156067956	rs6435612	T	C	0.5233	7.581	3.424e-14	+--??-?+---+?--+?-????-?-+------+--?++?+-+--+-+--+---?---+-+?+---+?+-++?--+-	0.4242	2.35506	295889	-3.248	0.001163	0.2655	11.7619	-2.187	0.02876	0.8054	0	-4.344	1.401e-05	0.1045	51.2274	0.1045	51.2274	-0.003255	0.0017452	0.0621727
20	47693160	rs2426117	A	G	0.323	7.581	3.442e-14	???++++?-----?+-+----+-+--?-+-++---+?----------+++----+-???-+???-++---++-++-	0.7074	0	277116	-4.401	1.08e-05	0.6236	0	-2.846	0.004433	0.7	0	-4.532	5.842e-06	0.2378	29.0445	0.2378	29.0445	0.0084765	0.0017446	1.18168e-06
2	156104169	rs1967191	A	G	0.5236	7.579	3.471e-14	???++???------??+?----++--?-+-++---+?----------+++?---+-????+????+++--++-+--	0.6728	0	271373	-4.657	3.209e-06	0.5256	0	-2.888	0.003879	0.737	0	-4.502	6.729e-06	0.2918	19.6357	0.2918	19.6357	-0.0033561	0.0017441	0.054325
4	106238767	rs2726507	T	C	0.4196	7.578	3.508e-14	???+++-?+++----++?+-+--+++??+-++++++?+-++--+----+-?++++++--?+????+--++-+++++	0.07719	21.1326	274254	2.449	0.01433	0.3626	6.86011	-0.133	0.8941	0.1674	19.6572	6.904	5.066e-12	0.3659	5.42245	0.3659	5.42245	0.0038313	0.0017446	0.0280867
6	26603866	rs9379901	T	C	0.8757	-7.577	3.526e-14	+-+--+--+-+--++-------+-++---+-+-+--++-+-++++++++----+-++++--+-+--+--+-+++++	0.05503	21.4997	300486	0.344	0.7306	0.3838	4.78684	1.839	0.06599	0.1798	18.719	6.376	1.822e-10	0.4172	0	0.4172	0	0.0037826	0.001766	0.0321959
16	28583865	rs11074911	T	C	0.3718	-7.577	3.529e-14	+-+++--++-++-++---+++-++-+++++-+++--++--++-+-++---++-+++++++-+++----+++-++++	0.01755	27.217	300486	4.892	9.992e-07	0.06839	25.9629	-0.408	0.6836	0.1803	18.6838	6.679	2.4e-11	0.2481	27.2904	0.2481	27.2904	-0.0020172	0.0017374	0.245635
16	28583610	rs111693583	T	C	0.372	-7.577	3.533e-14	-++-++-++++---+++-++---++++?+-++-+++?+-++++--++-+-++++++++--+++++----+++++++	0.07481	19.8348	294211	4.77	1.842e-06	0.4073	3.54106	0.452	0.651	0.08211	27.3537	6.212	5.219e-10	0.07755	56.0697	0.07755	56.0697	-0.002016	0.0017374	0.245912
1	41814276	rs12048805	A	G	0.2258	-7.577	3.546e-14	???+-+-?+++-+--++?+-+--+++??+-++-+++?+-++-++-++-+-?++++++++-+????---++++++++	0.7989	0	275445	3.035	0.002404	0.8328	0	0.867	0.386	0.7627	0	6.789	1.127e-11	0.2163	32.675	0.2163	32.675	0.00045361	0.0017283	0.792958
3	52568805	rs7639267	T	G	0.56	7.575	3.583e-14	++--+-----+-++-+------++-+-----++--++++--++-+-+--+?-++---+-------+-+---+----	0.1833	12.7482	300049	-4.332	1.475e-05	0.266	11.4884	0.63	0.529	0.391	4.76795	-4.298	1.727e-05	0.377	3.10078	0.377	3.10078	-0.0010165	0.0017446	0.560132
20	47697939	rs2426122	A	G	0.6771	-7.575	3.588e-14	???++++?-----?+-++---+++--?-+-++---+?----------+++----+-???-+???-++---++-+--	0.6582	0	277116	-4.418	9.975e-06	0.5207	0	-2.777	0.005485	0.7051	0	-4.546	5.461e-06	0.258	25.5952	0.258	25.5952	-0.00835	0.001745	1.71041e-06
6	98379875	rs12211582	T	G	0.4839	-7.575	3.599e-14	???++???------+-++----++--?-+-++---+?-+--------+++?---+-???-+????++---++-++-	0.5656	0	276693	-4.908	9.219e-07	0.3956	4.72031	-2.858	0.004258	0.7353	0	-4.605	4.128e-06	0.2393	28.8087	0.2393	28.8087	-0.0045842	0.0017436	0.00856052
6	26605206	rs9348726	A	G	0.1243	7.574	3.615e-14	+-+-+-----+-++-++-----++-+-+++-++-+-+-++---++---++-++--+--+-+------+---+--+-	0.256	9.21526	300486	-4.156	3.235e-05	0.8257	0	0.989	0.3225	0.1327	22.4706	-4.455	8.375e-06	0.1968	35.8974	0.1968	35.8974	-0.003781	0.001766	0.0322701
16	28603168	rs2077031	A	T	0.3606	-7.573	3.643e-14	???----?+++++?-+--+++-+-++?+-+--+++-?++++++++++---?+++-+???+-????--+++--+-++	0.6773	0	275952	4.394	1.113e-05	0.5267	0	2.852	0.004346	0.7136	0	4.632	3.629e-06	0.2792	21.8953	0.2792	21.8953	-0.001944	0.001736	0.262803
16	28588443	rs12448429	T	C	0.371	-7.573	3.651e-14	???++???------?-++----++--?-+-++---+?-+--------+++?---+-???-+????+++--++-+--	0.6707	0	274440	-4.902	9.489e-07	0.505	0	-2.84	0.00451	0.7705	0	-4.606	4.101e-06	0.2616	24.9812	0.2616	24.9812	-0.002037	0.0017371	0.240941
1	32133737	rs2292988	T	C	0.3546	-7.573	3.657e-14	+--------++-----+---++---++-----+---+-++-+---+++------+------------+-++---+-	0.8678	0	300486	-3.8	0.0001448	0.7231	0	-1.151	0.2498	0.9508	0	-5.674	1.391e-08	0.05332	60.8917	0.05332	60.8917	0.0036219	0.0017395	0.0373336
20	47697253	rs2426120	A	T	0.3241	7.572	3.688e-14	-++-++-++-+++++-+-++----+++?++++-++--+-++---+-----+++-+++++--+++?-+-+--+++++	0.03857	23.7271	295410	4.8	1.588e-06	0.1415	19.8008	0.275	0.7832	0.1455	21.4001	5.187	2.136e-07	0.08939	53.8958	0.08939	53.8958	0.0083522	0.001745	1.69903e-06
20	47691211	rs2075676	A	C	0.3232	7.57	3.719e-14	???++???-----?+-++---+-+--?-+-++---+?------+--++++?---+-???-+????++---++-+--	0.7773	0	275414	-4.125	3.708e-05	0.9375	0	-3.28	0.001039	0.417	3.12268	-4.655	3.241e-06	0.4028	0	0.4028	0	0.0084584	0.0017449	1.25026e-06
2	155742894	rs2652434	T	C	0.4706	-7.57	3.721e-14	-+-++---?+-+---++++++--+-------+---+-----++-+-++-++-+---+--+----+-++-+-+----	0.6921	0	291414	-4.604	4.142e-06	0.49	0	-0.774	0.4388	0.675	0	-5.044	4.554e-07	0.8334	0	0.8334	0	0.0029802	0.0017468	0.0879832
1	41816686	rs35030637	T	C	0.2249	-7.57	3.734e-14	???+-???++++-?+-?+-??---++?+---++++-?-+-+----+++--??-?--???-+????++-+-+?++++	0.01043	33.6769	271503	2.673	0.007507	0.04202	36.5299	-0.744	0.4567	0.1501	22.5479	6.544	6e-11	0.642	0	0.642	0	0.00043265	0.0017271	0.802193
16	28536473	rs62034323	T	C	0.4092	-7.57	3.739e-14	+---+-+--+----++++-+-++-++--+-----+-+-++-----+++-+++------+--++--+-----+--+-	0.3027	7.1897	300486	-2.115	0.03441	0.598	0	-1.529	0.1263	0.3318	8.50032	-5.655	1.558e-08	0.063	58.8872	0.063	58.8872	-0.0023266	0.0017394	0.181026
16	28535305	rs28772958	A	G	0.5886	7.569	3.75e-14	--++-++-+-++-++-+--+-+-+----------++------++++++++-+-----++---+-++++--++----	0.2423	9.83084	300486	-3.911	9.2e-05	0.4904	0	-0.603	0.5462	0.1139	24.1428	-5.501	3.767e-08	0.5723	0	0.5723	0	0.0022332	0.0017388	0.199017
6	98379027	rs6940021	A	G	0.4839	-7.569	3.761e-14	+---+-+-----+++--+++-++-+--+-++----+?-++--++++++-+------+--?---+?-++--------	0.0927	18.4875	296642	-2.365	0.01801	0.1773	17.4033	0.35	0.7265	0.2548	13.4724	-5.898	3.672e-09	0.7566	0	0.7566	0	-0.0045801	0.0017437	0.00862383
6	26601526	rs9379897	T	C	0.8755	-7.569	3.775e-14	???-+???----+?-+?-+??+++-+?-+++---++?+-+-++++----+?++?++???--????---++-?----	0.004534	36.6937	273057	-2.324	0.02014	0.05393	33.9877	1.456	0.1455	0.07668	29.9229	-5.947	2.735e-09	0.8761	0	0.8761	0	0.0037589	0.0017663	0.0333196
16	28539848	rs4788084	T	C	0.409	-7.568	3.783e-14	+-+++--++-+-----+-+++-++--+++--+++--++--+--+-++---++-+-+++++--++----+++-++++	0.03055	24.6579	300486	3.646	0.0002668	0.1333	20.0224	-0.592	0.5537	0.1495	21.0734	5.58	2.404e-08	0.1834	38.106	0.1834	38.106	-0.002299	0.0017394	0.186282
3	49930215	rs6795703	T	C	0.5039	-7.568	3.786e-14	-++--++-+++++-+++-++++-++++-+-+++++---++++--+++-+++-++-++++--+-++-+-++--++++	0.003703	32.9795	300486	1.78	0.0751	0.004789	40.2557	0.937	0.3489	0.1419	21.6915	5.913	3.355e-09	0.8563	0	0.8563	0	-0.0046624	0.0017488	0.00767361
2	156058242	rs13420813	T	C	0.5243	7.568	3.798e-14	???--???++++++?+--++++--++?+-+--+++-?+-++++++++---?+++-+???+-????---++--+--+	0.6128	0	274440	4.896	9.787e-07	0.4429	1.32143	2.842	0.004478	0.7645	0	4.513	6.4e-06	0.2385	28.9436	0.2385	28.9436	-0.0033095	0.001745	0.0578895
16	28534038	rs62034321	T	C	0.4089	-7.568	3.801e-14	+---+---?---+---++---++-------++--------+--++++-+++--?----++-++----+-++?--+-	0.003591	33.5818	289335	-4.503	6.712e-06	0.006972	39.0939	-1.854	0.06372	0.07476	28.9268	-3.663	0.0002496	0.3766	3.19458	0.3766	3.19458	-0.0023221	0.0017393	0.181865
16	28535003	rs4788085	A	G	0.5886	7.567	3.832e-14	-++--+-+-+---+----+---++------+-+--+--+----+-+---+-+-+++---------++---++----	0.752	0	300486	-4.38	1.185e-05	0.9612	0	0.729	0.4662	0.5711	0	-5.047	4.477e-07	0.135	46.0626	0.135	46.0626	0.0022385	0.0017388	0.197961
16	28583362	rs112191041	A	G	0.6281	7.566	3.842e-14	+--+--+---+-----++-++--+-+----+++----+--+--++---+-?-+---+-+-+++-+++---++----	0.2177	11.0374	300049	-3.027	0.002472	0.5619	0	-1.756	0.079	0.07952	27.6428	-7.009	2.392e-12	0.9138	0	0.9138	0	0.0020156	0.0017374	0.246003
1	41816319	rs12022655	T	G	0.2257	-7.565	3.888e-14	???-????-+--+--+?-+??++?--?--+++---+?----++++-+--+?++?+--+++-????----+-?----	0.01381	31.7728	278163	-2.401	0.01636	0.7615	0	1.424	0.1544	0.03255	37.8294	-8.134	4.146e-16	0.8543	0	0.8543	0	0.00046212	0.0017283	0.789169
17	56572070	rs2270097	A	G	0.3762	-7.564	3.919e-14	???--???+++++?-+--+++-+-++?+-+--+++-?++++++++++---?+++-+???+-????--+++--+-++	0.6566	0	275414	4.487	7.209e-06	0.5198	0	2.884	0.003923	0.712	0	4.517	6.267e-06	0.2658	24.2424	0.2658	24.2424	0.0053077	0.0017421	0.00231366
17	56966733	rs4408596	A	G	0.3793	-7.563	3.952e-14	??+-+--++++++?-+--+++-+-++?+-+--+++-?+-+++++-+----?+++-+???+-++-?--+++-++-++	0.4791	0	288078	4.042	5.302e-05	0.3427	7.81711	2.011	0.04436	0.5163	0	4.352	1.347e-05	0.3998	0	0.3998	0	0.0053009	0.0017417	0.00233884
1	41818307	rs12032040	T	C	0.2252	-7.561	3.993e-14	+++++----++-++++++--+----++++--+----+++--+++-++-+--+-+++---++-++-+++++--++++	0.0005991	38.058	300486	1.99	0.04659	0.03319	30.9321	1.7	0.08916	0.0107	40.7267	7.439	1.014e-13	0.4119	0	0.4119	0	0.00045625	0.0017279	0.791735
6	98536617	rs9398685	T	C	0.507	-7.561	3.997e-14	-++---++++-++++++-+--++---+-++-+++---++-+-++-+--+-+--++++++-+--+-+--+-+-++++	0.231	10.3514	300486	3.386	0.0007093	0.7887	0	1.293	0.1961	0.01942	37.617	4.154	3.271e-05	0.423	0	0.423	0	-0.0045011	0.0017417	0.00975663
16	28593347	rs17707300	T	C	0.6294	7.561	4e-14	???++???-----?+-++----++--?-+-++---+?------+---+++?---+-???-+????++---++-++-	0.6532	0	275414	-4.595	4.328e-06	0.5041	0	-2.804	0.005041	0.7218	0	-4.602	4.193e-06	0.2525	26.5426	0.2525	26.5426	0.0020425	0.0017386	0.240088
17	57111250	rs79436560	A	G	0.3717	-7.561	4.006e-14	-+-+-+++++-+--+--+++++--+-++--+--+-+-+--+++--+++--+--++-++-+-++++++-+++-++-+	0.2483	9.5601	300486	4.194	2.743e-05	0.8117	0	-0.974	0.3301	0.1354	22.2415	4.477	7.573e-06	0.1951	36.1702	0.1951	36.1702	0.0056102	0.0017419	0.00127879
20	47679963	rs6019621	T	C	0.3227	7.559	4.054e-14	-++++-+-+-+----++-+--++-----+-+++-++-----++-+-+++--+---+-+---+-+-++++-+-----	0.2465	9.64182	300486	-2.622	0.008743	0.1331	20.0352	0.223	0.8239	0.8049	0	-6.011	1.841e-09	0.4591	0	0.4591	0	0.00841	0.001745	1.4388e-06
17	57130785	rs12603238	T	C	0.3728	-7.558	4.084e-14	???++???------?-++----++--?-+-++---+?-+--------+++?---+-???-+????+++--++-+--	0.6473	0	274440	-4.908	9.205e-07	0.4954	0	-2.808	0.00498	0.7469	0	-4.605	4.123e-06	0.2613	25.0187	0.2613	25.0187	0.0056496	0.0017423	0.00118468
20	47688620	rs6512567	T	G	0.6768	-7.558	4.104e-14	+-+---+++---++++-+-+-+-++---+++-+++++++-+++--++---++++-+++-++--+-+--+--+++-+	0.2914	7.66731	300486	2.06	0.0394	0.5438	0	0.06	0.9522	0.386	5.08432	6.091	1.12e-09	0.3145	15.4453	0.3145	15.4453	-0.0084727	0.0017449	1.2006e-06
6	26601940	rs13208916	A	G	0.1247	7.557	4.138e-14	???--???++++++?+--++++--++?+-+--+++-?+-++++++++---?+++-+???+-????---++--+--+	0.6217	0	274440	4.895	9.828e-07	0.45	0.802208	2.841	0.004493	0.7643	0	4.546	5.476e-06	0.2438	28.0403	0.2438	28.0403	-0.0036971	0.0017674	0.0364586
17	56968181	rs4398153	T	C	0.6263	7.556	4.145e-14	-++-+-++--++---+--+---+--+--++------+--+-++-+-+-+--++-++-+-++-+-++-+---+--+-	0.3672	4.51455	300486	-4.469	7.87e-06	0.2127	14.5774	-0.147	0.8829	0.6975	0	-4.725	2.297e-06	0.426	0	0.426	0	-0.0053721	0.0017416	0.00203892
17	57131581	rs8069033	A	T	0.3723	-7.556	4.158e-14	???++???+-?-+?+--+-+----++?+----+-+-?-++-+-+---++-?--?-+???-+????++-+++?++++	0.01175	32.4822	272438	1.652	0.09859	0.3915	5.04892	-1.961	0.04985	0.1186	24.6862	6.634	3.274e-11	0.662	0	0.662	0	0.0055753	0.0017419	0.00137151
17	57086473	rs11079368	T	C	0.3727	-7.554	4.209e-14	???+????+?+??++???-??--?++???+-??+?-??++?+---+-++-??-?-+?????????---++??++++	0.1429	20.1189	240476	3.267	0.001087	0.994	0	-0.707	0.4796	0.1278	25.3271	7.803	6.05e-15	0.7095	0	0.7095	0	0.0057566	0.0017422	0.000952138
6	98378486	rs6934716	A	G	0.484	-7.552	4.279e-14	+--++-+-+-+++-++-+--+---++++++--+++-++--+++-+-+++-+++---++++++++---+++--++++	0.8742	0	300486	3.824	0.0001316	0.8403	0	-0.093	0.9261	0.7678	0	4.653	3.266e-06	0.468	0	0.468	0	-0.0045847	0.0017437	0.00855658
6	26463575	rs13195402	T	G	0.0947	7.552	4.285e-14	???++???------?-++----++--?-+-++---+?-+--------+++?---+-???-+????+++--++-++-	0.609	0	274440	-4.926	8.403e-07	0.4614	0	-2.826	0.004708	0.7382	0	-4.536	5.738e-06	0.2524	26.5606	0.2524	26.5606	-0.0042282	0.0017389	0.0150383
6	27301512	rs56401801	A	T	0.1007	7.551	4.31e-14	--++++-+++++-+--++++-+-+++?+-+-+++++-+++++---+--+--++-+-+--++--+----+++-++++	0.6566	0	297920	2.456	0.01406	0.3559	6.37828	1.172	0.241	0.7952	0	5.638	1.718e-08	0.8946	0	0.8946	0	-0.0039048	0.0017486	0.0255447
20	47685815	rs6019624	A	G	0.3231	7.55	4.349e-14	---------+---+-+-+--+++--+-----+--+-+-+--+----+-+-+-----+-++---+-++++++-----	0.0941	18.0704	300486	-1.877	0.06046	0.7639	0	0.152	0.8795	0.05868	30.2212	-6.577	4.809e-11	0.2257	31.0978	0.2257	31.0978	0.0085344	0.0017449	1.00323e-06
17	56594460	rs11079354	A	G	0.3748	-7.55	4.362e-14	+--+--+---+-----++-++--+-+----+++----+--+--++---+---+---+-+-+++---+---++----	0.1559	14.1366	300486	-3.19	0.001425	0.4221	2.68113	-1.799	0.072	0.07817	27.7978	-7.164	7.841e-13	0.9052	0	0.9052	0	0.0052573	0.0017416	0.00253863
20	47668037	rs7509369	A	G	0.3232	7.548	4.403e-14	--------?-------?+-+-+----?---++----+---+--+-++---+--?--+-+++++----+-+-?--+-	0.01828	27.7807	286689	-4.404	1.061e-05	0.05616	27.9812	-2.713	0.006662	0.06916	30.0119	-3.038	0.002383	0.704	0	0.704	0	0.0083258	0.0017449	1.8281e-06
17	57082013	rs11656413	A	C	0.6268	7.546	4.484e-14	+++--+-+--+-------++--++--------+--------+-+-+---+---+++--------+++----+----	0.6325	0	300486	-5.842	5.143e-09	0.7413	0	0.366	0.7147	0.7498	0	-5.411	6.283e-08	0.3251	13.4699	0.3251	13.4699	-0.0057801	0.0017418	0.000905524
20	47685493	rs2075675	T	C	0.6769	-7.546	4.492e-14	???++++?-----?+-++---+-+--?-+-++---+?----------+++?---+-???-+???-++---++-+--	0.6954	0	276679	-4.36	1.299e-05	0.5667	0	-2.799	0.00513	0.6966	0	-4.676	2.922e-06	0.279	21.9157	0.279	21.9157	-0.0085322	0.0017449	1.00925e-06
12	79659040	rs6539344	T	G	0.5823	-7.546	4.497e-14	+++---+++--+++++++-----+++-++--+++-++++++-+-+++-----++-+-++++-++--+++++++--+	0.7219	0	300486	4.932	8.126e-07	0.482	0	-0.499	0.618	0.9567	0	4.016	5.929e-05	0.4844	0	0.4844	0	0.0030265	0.0017434	0.0825658
17	57111101	rs58092632	T	C	0.6274	7.545	4.534e-14	+---+-+-----+--+?-+??+++--++-+++---++------++-+--++++?+++++++----------?----	0.3807	4.07017	298129	-2.56	0.01046	0.4447	1.42928	1.136	0.256	0.7931	0	-6.394	1.613e-10	0.8602	0	0.8602	0	-0.0056296	0.0017421	0.00123169
17	56554988	rs35273042	T	G	0.625	7.545	4.54e-14	+++----+-+++---++-+-+++++++---+--------+--++-+-++--+--+----+-+----++-+++--+-	0.2027	11.7013	300486	-2.116	0.03435	0.4597	0.591481	-0.75	0.4533	0.2408	14.408	-6.537	6.282e-11	0.4857	0	0.4857	0	-0.0052904	0.0017417	0.00238506
16	28585636	rs56209193	T	C	0.3712	-7.544	4.544e-14	-+---------+-+-++-+++-+---+-+++-----+-+-++-++++-+---+--+--++-+++-+++-+-+----	0.1042	17.3417	300486	-5.43	5.642e-08	0.7306	0	1.308	0.1909	0.2399	14.4714	-4.275	1.912e-05	0.03404	65.3899	0.03404	65.3899	-0.0019911	0.0017369	0.251652
1	41818676	rs6660265	T	C	0.7744	7.544	4.563e-14	----+++++--+------+---++-+----+-+--+--++++--+----+?+--+-+--+----+-+---+?----	0.4566	0.885244	299873	-2.502	0.01233	0.4312	2.18455	-0.155	0.8766	0.5686	0	-5.682	1.333e-08	0.6453	0	0.6453	0	-0.0004665	0.0017283	0.787209
17	56959422	rs12938821	T	C	0.3752	-7.541	4.671e-14	???++???------+-++----++--?-+-++---+?-+--------+++?---+-???-+????++---++-++-	0.5738	0	276693	-4.818	1.448e-06	0.3989	4.48522	-2.847	0.004409	0.7331	0	-4.627	3.71e-06	0.2369	29.2119	0.2369	29.2119	0.0053308	0.0017417	0.00220902
3	49936910	rs11130224	A	T	0.5039	-7.54	4.685e-14	+--+--+-+-+-----++-++--+-+----+++----+--+--++---+---+---+-+-+++-+++---++----	0.1053	17.2642	300486	-3.053	0.002263	0.3628	5.94211	-1.747	0.08063	0.05911	30.1611	-7.21	5.59e-13	0.9311	0	0.9311	0	-0.0046942	0.0017486	0.0072644
20	47583372	rs6019557	T	G	0.678	-7.54	4.709e-14	-+-+++--?-++---+-+---+++--+---++--+++--+-++++-++--+-+---+++-++---+++-++---+-	0.01214	28.8988	291414	-2.809	0.004975	0.1744	17.2344	0.31	0.7566	0.05484	30.7559	-5.877	4.171e-09	0.06972	57.5612	0.06972	57.5612	-0.0083547	0.0017447	1.67996e-06
16	28600091	rs62034359	T	C	0.3607	-7.54	4.715e-14	+---+-+--+-+-++-+----++--+?-----+---+-+--+-+++++-+----+--+-++--+-++++-+-----	0.04588	22.6556	297920	-2.591	0.009582	0.1662	17.803	0.679	0.4972	0.4909	0	-6.13	8.811e-10	0.0266	67.4338	0.0266	67.4338	-0.0019644	0.0017362	0.257875
20	47610297	rs1048590	T	G	0.3226	7.539	4.726e-14	-+++++-++++-+-+++-+----++++?+-++++++?+-++++--++-+-++++++++--+++++---++++++++	0.2651	8.91395	294211	5.168	2.361e-07	0.4875	0	0.75	0.4531	0.3863	5.0663	7.365	1.766e-13	0.07184	57.1551	0.07184	57.1551	0.0083401	0.0017447	1.75186e-06
17	56942130	rs9905764	C	G	0.6231	7.539	4.728e-14	-+++++++?+++-+++--+-+-+++-++++--++++-++--++-+--+-+-+-?++++-++--+-++-+-+?++-+	0.04584	22.9139	289335	3.963	7.402e-05	0.08393	24.5531	1.883	0.0597	0.1008	26.0707	3.436	0.0005906	0.4606	0	0.4606	0	-0.0053774	0.0017417	0.0020193
17	57110327	rs4932693	T	C	0.6274	7.539	4.729e-14	+++---+++--++++++--++----+-++---+-+-++--++++++--+-+-+++++++++++-+---+++-++++	0.6202	0	300486	2.753	0.005899	0.4906	0	-0.318	0.7506	0.8309	0	6.136	8.459e-10	0.8395	0	0.8395	0	-0.0056298	0.0017421	0.00123112
3	49936102	rs2230590	T	C	0.4927	7.537	4.816e-14	???----?+++++?-+--++++--++?+-+--+++-?++++++-+++---?+++-+???+-????--+++--+--+	0.6121	0	275952	4.453	8.475e-06	0.463	0	2.733	0.006285	0.6878	0	4.612	3.988e-06	0.2519	26.6504	0.2519	26.6504	0.0050222	0.0017503	0.00411339
3	49939587	rs3733135	A	G	0.5069	-7.536	4.864e-14	-----+----+-+--+-+-+-++-----+++----+--+--+-++--+++?+++---+--++--++---++--+--	0.009267	29.9501	300049	-3.901	9.59e-05	0.155	18.5974	-0.315	0.7524	0.009621	41.2352	-5.233	1.664e-07	0.2558	25.9808	0.2558	25.9808	-0.0047621	0.0017494	0.00648485
3	49951316	rs9848497	T	C	0.4928	7.536	4.864e-14	???++???+?+???+???-??---++???--??+?-??++?----+-++-??-?--?????????++-+-??++++	0.01683	35.6947	239450	2.43	0.0151	0.2808	18.8312	-1.825	0.068	0.1136	25.904	5.907	3.482e-09	0.8153	0	0.8153	0	0.0047295	0.0017501	0.00688494
17	56601552	rs8066773	T	C	0.3266	-7.535	4.88e-14	++++--++++-+--++++-----++-++++-+++-+-+--+++-+++-+-++--+++-++++-++---+++-++++	0.7777	0	300486	5.194	2.053e-07	0.51	0	0.526	0.5989	0.915	0	3.073	0.002116	0.9577	0	0.9577	0	0.0053417	0.0017406	0.00214931
17	56594197	rs3744109	T	C	0.3747	-7.535	4.885e-14	+++----+-++-----+-+-+-+++++---+--------+--0+-+-++--+--+-+--+-+----+--+-+--+-	0.2186	10.9317	300486	-1.92	0.05486	0.5308	0	-0.775	0.4385	0.2597	13.1492	-6.627	3.424e-11	0.4186	0	0.4186	0	0.0052862	0.0017415	0.0024027
17	56951474	rs12944948	A	G	0.3749	-7.534	4.93e-14	???++???------+-++----++--?-+-++---+?-+--------+++?---+-???-+????++---++-++-	0.6075	0	276693	-4.854	1.207e-06	0.4449	1.20611	-2.805	0.005038	0.732	0	-4.618	3.878e-06	0.2501	26.954	0.2501	26.954	0.0053875	0.0017418	0.00198061
1	32114793	rs4949455	A	G	0.6223	7.534	4.934e-14	+----------+----+--+++++--+--++-----+++-+++-+++++----?-+-++-++-+-+++-+-?----	0.5886	0	298407	-3.76	0.0001701	0.4213	2.72374	0.88	0.3788	0.834	0	-5.505	3.69e-08	0.9842	0	0.9842	0	-0.0023328	0.0017478	0.181974
20	47655617	rs6019608	T	C	0.3213	7.533	4.942e-14	??-+-++------?+-++-----+--??+-++---+?-+----++-++++?---+-???-++-+++++--+--+--	0.6941	0	284456	-3.656	0.0002563	0.5821	0	-1.945	0.05178	0.5749	0	-4.353	1.341e-05	0.4074	0	0.4074	0	0.0083009	0.0017404	1.84672e-06
3	52567014	rs12489828	T	G	0.53	7.532	4.992e-14	???++???------?-++----++--?-+-++--++?-+--------+++?---+-???-+????++---++-++-	0.6235	0	274440	-4.912	9.031e-07	0.5552	0	-3.002	0.002678	0.6821	0	-4.53	5.907e-06	0.2747	22.6804	0.2747	22.6804	-0.0011018	0.0017462	0.528068
16	28903188	rs9746702	T	C	0.6496	-7.531	5.036e-14	-++++++-+++-++++-++----++++++--+++++-------+-+---++++?----+++++-++--+++?++++	0.6185	0	298407	2.994	0.00275	0.4091	3.40031	-0.928	0.3533	0.8797	0	5.26	1.438e-07	0.9607	0	0.9607	0	0.003174	0.0017358	0.0674683
17	56892699	rs4793593	C	G	0.6274	7.531	5.051e-14	---++++--+-+--+++++++-+-----+-+++--+---+--+++--+++-+----+----+---++---------	0.0004217	38.8977	300486	-4.358	1.313e-05	0.0846	24.2439	1.046	0.2955	0.003952	45.0419	-5.176	2.268e-07	0.09137	53.5388	0.09137	53.5388	-0.0054638	0.0017415	0.0017049
20	47647662	rs6019601	T	C	0.6775	-7.53	5.087e-14	-+--+-+--------+++++-?---+-+-+++----+------+++--+++-+--+--+----+++++--+-----	0.03765	23.7239	300394	-5.228	1.714e-07	0.00508	40.0282	-1.08	0.2801	0.6917	0	-3.428	0.0006091	0.7339	0	0.7339	0	-0.0083663	0.0017449	1.62967e-06
16	28533071	rs28698667	T	C	0.4092	-7.528	5.151e-14	+-+--+++?-+-+++------++-+++++++-+++-+++++--+-+--+--+-+++-++-++++-+--+-+-++-+	0.7262	0	291414	4.492	7.063e-06	0.5242	0	0.78	0.4355	0.6895	0	4.995	5.878e-07	0.8175	0	0.8175	0	-0.0022301	0.0017393	0.199784
17	56535932	rs717828	A	G	0.3749	-7.527	5.194e-14	+-+-+++-++-++++++--+++-+++++---+++---+-+-----+-+--++++-+-++++++++-+-+-++++++	0.7024	0	300486	3.268	0.001084	0.4299	2.24829	0.77	0.4411	0.6882	0	4.718	2.386e-06	0.9483	0	0.9483	0	0.0052308	0.0017416	0.00266993
16	28593597	rs4788074	A	G	0.3612	-7.527	5.195e-14	+++---+-+++++++++-----+-+-++--+++++++++-++-++-+-+--++-+-+++-++++-+-++++-++-+	0.2294	10.4253	300486	4.41	1.036e-05	0.5505	0	0.255	0.7986	0.09108	26.3858	4.642	3.448e-06	0.6107	0	0.6107	0	-0.0020354	0.0017362	0.241079
16	28586127	rs7193402	T	C	0.6372	7.527	5.203e-14	----+---?---+--------++-------++--------+--++++-+++--?----++-++-+--+-++?--+-	0.003949	33.274	289335	-4.26	2.041e-05	0.002497	42.9725	-1.776	0.07567	0.1634	20.511	-3.561	0.0003699	0.4307	0	0.4307	0	0.0021276	0.001736	0.220359
17	56953147	rs9911578	T	C	0.625	7.526	5.23e-14	--+--+-+?++++++-?+-?+?+-++?++-+-++++++-+-+-----++-+-++++-+++++++-++-++--++-+	0.1329	15.9301	288581	4.575	4.752e-06	0.3365	7.53358	1.012	0.3115	0.1504	21.8727	3.317	0.0009106	0.2174	32.4781	0.2174	32.4781	-0.0053322	0.0017417	0.00220293
20	47638256	rs2869692	A	G	0.3225	7.526	5.25e-14	-+-+-+-++++--++-?+-++---++-++--+++---++++++----++++++?++-----+++-+--+++?++++	0.0512	22.284	298327	3.277	0.001049	0.03046	31.4493	-0.263	0.7928	0.6111	0	6.315	2.699e-10	0.3666	5.27313	0.3666	5.27313	0.0083603	0.0017428	1.61176e-06
17	57002324	rs9894548	T	C	0.6251	7.526	5.25e-14	++++?+-+--+++++-?+-???-++-++-+--++++++-++++--+++++++++-++++++-+++++-++--++++	0.9994	0	300010	3.796	0.0001469	0.9912	0	0.667	0.5046	0.9862	0	4.013	5.998e-05	0.4323	0	0.4323	0	-0.0052866	0.0017419	0.00240602
17	56999427	rs66954617	A	G	0.3749	-7.525	5.254e-14	+-+---+-+---++++-+-+-+-++---+++--++++++-+++--++---++++-+++-++--+-+--+--+++-+	0.3851	3.78571	300486	2.061	0.03934	0.5796	0	0.135	0.8925	0.4846	0	6.037	1.569e-09	0.3258	13.3449	0.3258	13.3449	0.0053959	0.0017419	0.00195029
20	47647876	rs13042947	T	C	0.6775	-7.525	5.27e-14	???-????-+--+--+?-+??++?--?--+++--++?-----+++-+--+?++?+--+++-????--+-+-?----	0.01404	31.6974	278163	-2.406	0.01615	0.8143	0	1.496	0.1346	0.02523	39.5342	-7.959	1.728e-15	0.765	0	0.765	0	-0.0083663	0.0017449	1.62967e-06
20	47641339	rs66970580	T	C	0.6775	-7.525	5.284e-14	++++-----++-+-++++-+++--+-++++---++-++----++-++++---++-+-++-++++-+-+++-?++++	0.5114	0	300310	2.656	0.007917	0.467	0.184658	-0.021	0.983	0.6405	0	5.621	1.895e-08	0.5772	0	0.5772	0	-0.0083877	0.0017449	1.5325e-06
20	47549047	rs34984028	T	C	0.3223	7.525	5.291e-14	???--???+++++??+--+++---++?+-+--++--?+++++++++-+--?+++-+???+-????---+---+--+	0.214	12.527	273161	3.932	8.424e-05	0.07121	32.0484	2.034	0.04195	0.5359	0	4.641	3.47e-06	0.2891	20.1278	0.2891	20.1278	0.0083283	0.0017445	1.80634e-06
4	106255589	rs2726479	T	C	0.433	7.524	5.325e-14	--+++-++--+-----+-+---++-+----+---++--++---+--+++-?----+-+---+---+-+---+--+-	0.4265	2.11511	300049	-4.878	1.074e-06	0.3835	4.84324	0.073	0.9422	0.868	0	-5.091	3.563e-07	0.04436	62.8759	0.04436	62.8759	0.0033668	0.0017504	0.0544252
17	56990099	rs1588322	T	C	0.3745	-7.523	5.337e-14	???--???+++++?-+--++++--++?+-+--+++-?++++++-+++---?+++-+???+-????--+++--+--+	0.6427	0	275414	4.662	3.132e-06	0.4964	0	2.821	0.004794	0.7201	0	4.616	3.912e-06	0.251	26.8114	0.251	26.8114	0.0053705	0.0017419	0.00204786
20	47610896	rs2295033	T	C	0.3226	7.523	5.342e-14	???++???------??+?----++--?-+-++--++?-+--------+++?---+-????+????+++--+--+--	0.5951	0	271373	-4.597	4.28e-06	0.4883	0	-2.761	0.005761	0.6469	0	-4.491	7.094e-06	0.2969	18.7212	0.2969	18.7212	0.0083411	0.0017447	1.74622e-06
20	47550488	rs6095367	T	C	0.3223	7.522	5.403e-14	???++???----+??--+--------?-+-+--+++?--+--+-+-+-+-?-----???-+????++--+++--+-	0.1462	16.4835	273161	-3.796	0.0001471	0.1349	25.063	-2.906	0.003665	0.2367	14.6855	-3.855	0.0001158	0.6696	0	0.6696	0	0.0082904	0.0017445	2.01187e-06
20	47679300	rs6019620	A	T	0.3228	7.522	5.407e-14	+---+---?---+----+---++-------++--------+--++++-+++--?----++-++----+-++?--+-	0.003919	33.2994	289335	-4.561	5.101e-06	0.007668	38.6927	-1.858	0.06312	0.07611	28.7659	-3.69	0.0002241	0.3808	2.31195	0.3808	2.31195	0.008359	0.0017449	1.66418e-06
16	28529949	rs240704	T	C	0.59	7.521	5.419e-14	++++-++++++---+--+---+++++-+---+++++-+-++-+--+----++-++++---+--++-+++++-+-+-	0.06412	20.5837	300486	5.94	2.857e-09	0.5794	0	-0.025	0.9798	0.1699	19.4717	4.392	1.121e-05	0.009273	73.9312	0.009273	73.9312	0.0020559	0.001739	0.237105
17	57144367	rs8182277	T	C	0.6273	7.521	5.419e-14	-+-+-+++++-+--+--+++++--+-+---+--+-+-+--+++--+++--+--++-++-+-++++++-+++-++-+	0.2549	9.26249	300486	4.173	3.007e-05	0.825	0	-0.962	0.3359	0.1291	22.7839	4.458	8.27e-06	0.1992	35.4977	0.1992	35.4977	-0.0056824	0.0017422	0.0011079
17	57113124	rs1967415	A	C	0.3725	-7.521	5.441e-14	---+++----+++-+?-++-++++----------++---+---++--+++++--+-----+-----+----+----	0.5219	0	300127	-4.576	4.736e-06	0.4829	0	-0.676	0.4992	0.4555	0.658962	-5.345	9.041e-08	0.6355	0	0.6355	0	0.0055997	0.0017421	0.00130798
20	47647417	rs6012586	T	C	0.6775	-7.521	5.449e-14	+-+--------+----+------++-+--+--+--+-------++----+---++---+--++-++-+---+--+-	0.7791	0	300486	-3.008	0.002632	0.5133	0	-0.552	0.5808	0.8887	0	-5.413	6.204e-08	0.4383	0	0.4383	0	-0.0083663	0.0017449	1.63005e-06
17	56988243	rs7216680	C	G	0.6251	7.52	5.464e-14	+--+-++++--++++-------+-+-++-+-+++-+-+--++++-+++-+++-+-+++--++----++-+++++++	0.03317	24.2463	300486	0.168	0.8669	0.4624	0.440551	2.323	0.02018	0.087	26.8186	6.569	5.058e-11	0.6486	0	0.6486	0	-0.0053176	0.0017418	0.00226621
17	56603978	rs2079703	A	G	0.3749	-7.52	5.47e-14	???----?+++++?-+--+++-+-++?+-+--+++-?++++++++++---++++-+???+-???+--+++--+-++	0.7171	0	277116	4.39	1.133e-05	0.6191	0	2.864	0.004183	0.6872	0	4.626	3.73e-06	0.2926	19.4847	0.2926	19.4847	0.0052029	0.0017416	0.00281255
20	47640029	rs6019591	A	T	0.3225	7.52	5.477e-14	+-+??+?+++++-++-?+???--?++-+++--++---++-+--?-+-++--+++-+-+-++-++--+-+++?++++	0.02375	27.3613	298508	2.836	0.004573	0.1612	18.1532	-1.001	0.3169	0.1215	26.8191	6.111	9.93e-10	0.4386	0	0.4386	0	0.0083796	0.0017449	1.56892e-06
20	47639737	rs7270848	A	G	0.6775	-7.52	5.479e-14	++++-++-++----++-++-++----+-++---++++-++-+-+-++-+++--+-+++++-+--+-++++--++++	0.316	6.62932	300486	2.545	0.01093	0.3948	4.18473	1.351	0.1767	0.2	17.2414	5.044	4.559e-07	0.8275	0	0.8275	0	-0.0083472	0.0017449	1.72108e-06
17	57149695	rs6503893	A	G	0.6278	7.52	5.483e-14	--++++-++-++++-++++-+-+++++++++++++----+++--+-++-+++---++-+++++++---+++-++++	0.8064	0	300486	4.164	3.131e-05	0.7649	0	-0.065	0.9483	0.7256	0	4.465	7.998e-06	0.4926	0	0.4926	0	-0.0056022	0.0017419	0.00129957
17	57004787	rs1971659	A	G	0.3744	-7.519	5.517e-14	--++?++++-++-++-?+-??--?++?-+---++--+++++----+-++-+-+?-++---++++++--+-+?++++	0.04757	23.376	295310	2.868	0.004132	0.6713	0	-1.517	0.1292	0.0954	28.6446	7.479	7.498e-14	0.5599	0	0.5599	0	0.0053708	0.0017419	0.00204692
17	56776320	rs12938772	T	C	0.3737	-7.519	5.518e-14	+---?-----+-+--+?-+??++?--+--+++--+++----++++-+--+-+-?+-++++------++-+-?----	0.01523	28.9	297876	-3.131	0.001744	0.2962	9.6474	1.505	0.1324	0.12	26.0783	-7.531	5.031e-14	0.5616	0	0.5616	0	0.0052592	0.0017414	0.00252639
17	56910720	rs1472288	A	G	0.6247	7.519	5.535e-14	+++---++++---+-?---+--+-+++++-++++--+++-+++--+--+---++-++-++-+++++-++++-++++	0.3923	3.5114	300127	4.888	1.018e-06	0.4789	0	0.773	0.4397	0.3534	7.14087	5.205	1.94e-07	0.3282	12.8667	0.3282	12.8667	-0.0053476	0.0017418	0.00213944
16	28587597	rs62034358	T	G	0.3616	-7.518	5.559e-14	+-+-+--+---+---++--++---++++++-+-++--+-++--+-+---+-+-++++--+++++-++++---++++	0.5613	0	300486	2.371	0.01774	0.6176	0	-0.012	0.9907	0.6895	0	6.053	1.423e-09	0.3932	0	0.3932	0	-0.0020523	0.0017362	0.23717
17	56976981	rs9892062	A	G	0.625	7.518	5.572e-14	????????+??????????????????????-?-?????????-???????-????????????????-???----	0.02408	52.9609	206926	-2.688	0.007184	0.0009776	78.3982	-0.061	0.9515	1	NA	-4.776	1.788e-06	0.9386	0	0.9386	0	-0.0053126	0.0017417	0.0022877
17	56906254	rs12952832	T	C	0.3752	-7.516	5.652e-14	???++???--------++----++--?-+-++---+?-+--------+++?---+-???-+????+++--++-+--	0.6392	0	276693	-4.855	1.203e-06	0.4874	0	-2.834	0.004593	0.7352	0	-4.604	4.143e-06	0.2632	24.6988	0.2632	24.6988	0.0053507	0.0017418	0.00212667
17	56908188	rs8079774	A	G	0.3753	-7.516	5.664e-14	-+-++++++-+--+-+--+-+++++--+-------+--+-+--++-++--+++--++-++--------+-------	0.1811	12.7887	300486	-1.181	0.2377	0.3222	8.18739	-1.202	0.2294	0.2841	11.5514	-6.004	1.922e-09	0.9458	0	0.9458	0	0.0053762	0.0017418	0.00202442
16	28588049	rs12445823	A	C	0.6385	7.515	5.702e-14	???--???++++++-+--++++--++?+-+--+++-?+-++++++++---?+++-+???+-????--+++--+--+	0.5708	0	276693	4.869	1.12e-06	0.3939	4.8412	2.838	0.004536	0.7362	0	4.621	3.824e-06	0.2416	28.401	0.2416	28.401	0.0020529	0.0017361	0.237012
17	56953786	rs10401050	A	C	0.3755	-7.515	5.713e-14	+++---+-?++-++++-++--++-+++++++-+++-++++++------+-+--+++-++-++++-+--++--++++	0.1334	15.5319	291414	5.83	5.546e-09	0.7726	0	-0.622	0.5337	0.08916	26.5875	7.616	2.608e-14	0.4351	0	0.4351	0	0.0053229	0.0017418	0.00224285
17	56761357	rs302881	T	C	0.6042	7.514	5.743e-14	---+-++-+++-+-++---+--++++--+-++--+---+++---++--++-++--+---+---+-+----------	0.03092	24.5989	300486	-1.741	0.08166	0.358	6.20237	-0.658	0.5103	0.06661	29.1835	-7.174	7.281e-13	0.3882	0.727995	0.3882	0.727995	-0.0050562	0.0017412	0.00368553
17	56863064	rs1494977	T	C	0.6249	7.513	5.757e-14	???--???+++++?-+--++++--++?+-+--+++-?++++++++++---?+++-+???+-????--+++--+--+	0.6086	0	275414	4.693	2.69e-06	0.4862	0	2.825	0.004723	0.6858	0	4.619	3.862e-06	0.2501	26.954	0.2501	26.954	-0.0052594	0.0017418	0.00253221
17	56949044	rs9907499	A	G	0.375	-7.513	5.779e-14	+-----+-----+-+--+-++-+++----++-+++++-+++-++--+++-?--++---+-------++-+-+----	0.6009	0	300049	-3.418	0.0006314	0.6285	0	-0.367	0.7137	0.516	0	-4.433	9.315e-06	0.2559	25.9625	0.2559	25.9625	0.0053729	0.0017417	0.00203704
17	56864422	rs9904879	A	G	0.6244	7.512	5.833e-14	-++---++-+--++--+---+++++++-+--++++-+++++++++-+++-++-+-++-++-++++++-+-++++-+	0.9234	0	300486	4.472	7.755e-06	0.8451	0	1.145	0.2522	0.7553	0	3.288	0.001009	0.903	0	0.903	0	-0.0052739	0.0017418	0.00246263
17	56767996	rs302874	A	G	0.395	-7.512	5.842e-14	+++--++++--+++++++-++-+--+-++---+-+-++-+++++-+---++-++++++++-+++----++++++++	0.6973	0	300486	3.756	0.000173	0.2534	12.1092	0.454	0.6495	0.9274	0	5.649	1.616e-08	0.9355	0	0.9355	0	0.0051805	0.0017409	0.00292348
1	32122164	rs7545321	A	G	0.3779	-7.511	5.856e-14	-++++-+-++-+--+-++--++-+++?+-+-++++--+-++-+--+-+--?+--++--++--+---+-++-+++++	0.01152	29.2608	297483	4.221	2.43e-05	0.05292	28.4126	-0.19	0.8495	0.0704	28.714	4.254	2.101e-05	0.2808	21.6096	0.2808	21.6096	0.002036	0.0017463	0.243663
17	56933622	rs12940681	T	C	0.3753	-7.51	5.902e-14	???++???------?-++----++--?-+-++---+?-+--------+++?---+-???-+????+++--++-+--	0.6565	0	274440	-4.875	1.09e-06	0.489	0	-2.841	0.004493	0.7652	0	-4.599	4.242e-06	0.2564	25.8893	0.2564	25.8893	0.005351	0.0017416	0.00212324
16	28589455	rs4787455	A	G	0.3614	-7.51	5.917e-14	-++--+-+-+---+----+---++------+-+--+--+----+-+---+-+-+++---------++---++----	0.7484	0	300486	-4.387	1.148e-05	0.9599	0	0.726	0.468	0.5696	0	-5.047	4.498e-07	0.1348	46.0916	0.1348	46.0916	-0.0020543	0.0017359	0.23663
17	56940742	rs7215808	C	G	0.6246	7.51	5.919e-14	-++-++--+-++++++++------++-+-+--++++++-----+++--++?-+--++--+-+++-+--+-++++++	0.6046	0	300049	2.107	0.03509	0.4814	0	0.242	0.8086	0.7685	0	5.834	5.401e-09	0.7527	0	0.7527	0	-0.0053443	0.0017418	0.00215278
16	28588395	rs12445744	A	C	0.6385	7.51	5.925e-14	???++???------?-++----++--?-+-++---+?-+--------+++?---+-???-+????+++--++-+--	0.6431	0	274440	-4.937	7.917e-07	0.4816	0	-2.803	0.005064	0.7558	0	-4.597	4.284e-06	0.261	25.0936	0.261	25.0936	0.0020526	0.001736	0.23705
20	47651492	rs6019602	A	G	0.3226	7.51	5.935e-14	+-+--------+----+------+--+--+--+--+-------++----+---++---+--++-++-+---+--+-	0.7551	0	300486	-3.007	0.002639	0.4966	0	-0.638	0.5233	0.8708	0	-5.371	7.822e-08	0.3996	0	0.3996	0	0.0083521	0.0017449	1.69707e-06
16	28826049	rs28472312	T	C	0.7063	-7.509	5.947e-14	---+-++++++--++-?+-?+---+--++--+++---+-++-+--++++++++?++--+--+++-++++++?++++	0.2381	10.2618	298232	3.119	0.001812	0.3127	8.7154	-0.096	0.9232	0.503	0	6.398	1.577e-10	0.326	13.2948	0.326	13.2948	0.0035042	0.0017312	0.0429536
17	56902297	rs9897326	A	G	0.3754	-7.509	5.957e-14	???--???++?+-?+++--++---++?+-+--++--?+++++----+-+-?-+?-+???++????-++++-?++++	0.1668	15.4289	272438	1.835	0.06653	0.8658	0	-1.26	0.2075	0.1549	21.4979	6.137	8.384e-10	0.5541	0	0.5541	0	0.0053411	0.0017418	0.00216671
3	52540773	rs1010553	T	C	0.5108	7.509	5.959e-14	----------+++--+---+-++--+---++---++--+----++-+++--+++------++--+++--++-----	0.06845	20.1788	300486	-6.453	1.097e-10	0.3831	4.82309	0.012	0.9903	0.1049	24.9962	-8.06	7.601e-16	0.4313	0	0.4313	0	-0.0016994	0.0017526	0.3322
17	56583098	rs4793591	A	G	0.6193	7.509	5.974e-14	+++---+++--+++++++-++----+-++---+-+-++--++++++--+-+-+++++++++++-----+++-++++	0.6483	0	300486	2.809	0.004967	0.5062	0	-0.301	0.7633	0.8437	0	6.12	9.386e-10	0.8347	0	0.8347	0	-0.005647	0.0017424	0.00119124
17	57122831	rs56297715	T	C	0.6298	7.509	5.974e-14	-+-??-+----++--+?+-???-?-+----+-+--?--+--+-+--+++-+-+-+-+-++-+---++--++-----	0.8703	0	299423	-2.944	0.003237	0.8639	0	-0.693	0.4885	0.5411	0	-5.455	4.904e-08	0.865	0	0.865	0	-0.0056617	0.0017422	0.00115505
20	47654564	rs927160	C	G	0.6769	-7.508	5.994e-14	--+-+-----+-++--+---+-++----+--++-+-+--+-+-++-+++++-+-++--+-+----------+--+-	0.106	17.2158	300486	-3.96	7.495e-05	0.3714	5.46864	1.391	0.1643	0.2409	14.4007	-4.775	1.798e-06	0.3419	10.2334	0.3419	10.2334	-0.0083579	0.0017449	1.66955e-06
17	56977919	rs9894274	A	G	0.625	7.508	6.012e-14	++++-+-+-+++-++-?+-+++--+-++++---+--++--+++-++-+++++----++++++-+-+-+++--++++	0.6262	0	300406	3.525	0.0004236	0.6295	0	0.497	0.6194	0.5878	0	4.299	1.718e-05	0.1715	40.048	0.1715	40.048	-0.0052677	0.0017418	0.00249172
6	108896215	rs2802288	A	G	0.3829	-7.508	6.015e-14	+-+-+------++--+?-+--+++--+--++---+++-+----++++------?--+++++---+-++---?----	0.03547	24.3006	298327	-3.387	0.0007064	0.02337	32.9691	0.443	0.6575	0.6222	0	-6.347	2.191e-10	0.2881	20.2976	0.2881	20.2976	0.011052	0.0017643	3.75232e-10
17	57148991	rs6416932	A	G	0.6274	7.508	6.015e-14	++----+--+----+----+-+-------------++++---++-+--+---+++--+-------+++---+----	0.8027	0	300486	-4.158	3.216e-05	0.7664	0	0.075	0.94	0.7202	0	-4.488	7.175e-06	0.485	0	0.485	0	-0.0056789	0.0017421	0.00111455
17	56965373	rs4636974	C	G	0.375	-7.508	6.016e-14	-+-+-+?+--++-----++++++------+-+---+?---+-++---+-+-+-+-++++-+--+---+--++--+-	0.05103	22.1782	298380	-4.027	5.638e-05	0.1846	16.7196	-0.76	0.4471	0.08918	26.5857	-4.79	1.669e-06	0.1094	50.3722	0.1094	50.3722	0.0052812	0.0017417	0.00242829
17	56937256	rs4076229	T	C	0.6249	7.507	6.034e-14	---++++-+--+++++-+-+-+-----+++-++++++++-+++-+-+--++-++-+-++-+-++++-++-+-++-+	0.2656	8.79019	300486	1.918	0.05516	0.5126	0	0.649	0.5165	0.3743	5.82622	6.609	3.877e-11	0.4049	0	0.4049	0	-0.0053456	0.0017418	0.00214734
6	27249686	rs72839445	A	G	0.0976	7.507	6.047e-14	--+------++---+-+---+++--++------------+-+-+--+++-----++--------+--+-+++--+-	0.8871	0	300486	-2.282	0.02247	0.995	0	-0.949	0.3425	0.292	11.0426	-5.4	6.676e-08	0.3811	2.24829	0.3811	2.24829	-0.0040402	0.0017386	0.0201326
17	56905843	rs11870601	A	G	0.3753	-7.506	6.091e-14	---------+++++-+-+--+-+--+--------+-+-+--+----+-+------++-+++----+++-+------	0.006186	31.2645	300486	-2.704	0.006846	0.6757	0	-0.611	0.5409	0.001017	49.6999	-7.375	1.642e-13	0.149	43.7359	0.149	43.7359	0.0053844	0.0017418	0.00199251
6	29167575	rs3116830	A	G	0.1078	7.506	6.097e-14	???--???++++++??-?++++--++??-+--++--?++++++++++---?+++-+????-????---++--+-++	0.7196	0	267024	4.145	3.397e-05	0.4748	0	2.773	0.005554	0.7908	0	4.458	8.29e-06	0.3013	17.8982	0.3013	17.8982	-0.0035337	0.0017406	0.0423448
20	47645989	rs6095400	A	C	0.6774	-7.506	6.104e-14	--++-+-++-++-+--++--++-+-+-+----+++-++-+++-+-++++-?+-+--+-+++-+++-+-+--+++-+	0.396	3.36019	300049	2.77	0.005612	0.5185	0	2.042	0.04111	0.2287	15.2303	4.962	6.967e-07	0.5116	0	0.5116	0	-0.0083651	0.0017449	1.63493e-06
17	56964271	rs9901181	T	C	0.6249	7.505	6.131e-14	+----+----+-+--+---+-+------+++----++-+--++++--++++--+--++--++---+----+--+--	0.05406	21.6022	300486	-3.787	0.0001525	0.3031	9.25384	-0.393	0.6945	0.02893	35.2388	-4.128	3.654e-05	0.317	14.9901	0.317	14.9901	-0.0052755	0.0017417	0.00245527
16	28529716	rs240705	T	C	0.4099	-7.504	6.181e-14	+--------++-----+---++---++-----+---+-++-+---+++------+-----------++-++---+-	0.8692	0	300486	-3.782	0.0001557	0.7438	0	-1.007	0.3141	0.9487	0	-5.709	1.137e-08	0.05306	60.9477	0.05306	60.9477	-0.0022629	0.0017389	0.193152
17	56896834	rs4482353	A	G	0.3759	-7.504	6.181e-14	++----+--------+---+----------+----+--++-+-+----+-++--++----+---++-+---+--+-	0.5617	0	300486	-4.552	5.312e-06	0.2933	9.81038	-0.185	0.8533	0.8688	0	-4.621	3.82e-06	0.3702	4.54979	0.3702	4.54979	0.0053724	0.0017418	0.00203986
17	57010225	rs8071280	T	C	0.3743	-7.504	6.189e-14	-+-+-+++++-+--+--+++++--+-+---+--+-+-+--+++--+++--?--++-++-+-++++++-+++-++-+	0.2663	8.8086	300049	4.22	2.438e-05	0.8475	0	-1.008	0.3134	0.1344	22.3261	4.45	8.601e-06	0.2021	35.0227	0.2021	35.0227	0.0053792	0.0017418	0.00201372
12	79648170	rs1245829	A	T	0.5816	-7.504	6.192e-14	???--???++++++-+--++++--++?+-+--+++-?++++++++++---?+++-+???+-????--+++--+--+	0.5797	0	276693	4.871	1.11e-06	0.4082	3.82689	2.833	0.004605	0.7307	0	4.618	3.867e-06	0.2506	26.8649	0.2506	26.8649	0.0029109	0.0017436	0.0950167
17	57173845	rs6503894	A	G	0.3722	-7.504	6.192e-14	+-+--+++++--++++-++-----+-+--+-++--+++++-++-++++++++++-++--+-++-----+++++-++	0.6159	0	300486	3.879	0.0001048	0.5609	0	2.066	0.03883	0.5244	0	3.859	0.000114	0.3351	11.5305	0.3351	11.5305	0.0055877	0.001742	0.00133875
17	56777148	rs405684	T	C	0.3752	-7.503	6.23e-14	+++----+-++-----+-+-+-+++++---+--------+---+-+-++--+--+-+--+-+----+--+-+--+-	0.2519	9.3995	300486	-1.896	0.05791	0.493	0	-0.683	0.4948	0.3647	6.42837	-6.612	3.779e-11	0.4212	0	0.4212	0	0.005258	0.0017417	0.00253805
17	57184162	rs7503190	A	C	0.3721	-7.503	6.258e-14	----+++++--+-----++---++-+----+++--+--++++--+----+-+--+-+--+----+-++--+?----	0.272	8.55844	300310	-2.693	0.007087	0.3627	5.94432	-0.027	0.9786	0.3575	6.95884	-5.388	7.14e-08	0.4236	0	0.4236	0	0.005583	0.001742	0.00135083
17	56600660	rs12449365	C	G	0.6252	7.501	6.335e-14	???-????-+--+--+?-+??++?--?--+++--++?-----+++----+??+?+--+++-????--+-+-?----	0.01296	32.274	276609	-2.467	0.01362	0.8275	0	1.495	0.1349	0.01971	41.0649	-7.944	1.962e-15	0.8185	0	0.8185	0	-0.005249	0.0017416	0.0025787
17	56917053	rs7223955	A	C	0.6247	7.501	6.335e-14	-+-+---+--+-----+-+---+-----+++---+++-+-+++++--+++----+-+--------+-+-+------	0.7781	0	300486	-3.471	0.0005186	0.4761	0	-0.558	0.577	0.7713	0	-4.624	3.766e-06	0.9864	0	0.9864	0	-0.005275	0.0017418	0.0024581
17	56914588	rs7342903	C	G	0.3758	-7.5	6.402e-14	+++--+-+-+---+-+--+-++++++++-+--+++-+++++-+--++-++-++++-+-++--++-+---+++++++	0.7825	0	300486	3.857	0.0001149	0.6244	0	1.035	0.3004	0.612	0	4.098	4.167e-05	0.8541	0	0.8541	0	0.0052724	0.0017418	0.00247002
17	57182793	rs8067264	C	G	0.6279	7.499	6.442e-14	???+-++?+++---+?+?-+--+--+??+--++++-?-+-+-++----+-?+-?-+----????++-++++?++++	0.3926	3.79128	273535	1.697	0.08978	0.1377	23.288	0.051	0.9591	0.8868	0	5.875	4.218e-09	0.6916	0	0.6916	0	-0.0055687	0.001742	0.00138995
20	47652338	rs707534	A	G	0.6774	-7.499	6.453e-14	+-+---+-+---++++-+-+---+---++++-+++++++-++---+----++++-+++++++-+-+--+--+++-+	0.3615	4.74739	300486	2.136	0.0327	0.5225	0	0.118	0.9061	0.4704	0	5.896	3.726e-09	0.3428	10.045	0.3428	10.045	-0.0083829	0.0017449	1.55382e-06
20	47664667	rs6019613	T	C	0.3228	7.499	6.454e-14	+++---+++--++++++--++----+-++---+-+-++--++++++--+-+-+++++++++++-+---+++-++++	0.5737	0	300486	2.779	0.00545	0.4107	3.30924	-0.36	0.719	0.8269	0	5.941	2.832e-09	0.8512	0	0.8512	0	0.0083413	0.0017449	1.75106e-06
20	47652254	rs707533	A	G	0.6774	-7.498	6.469e-14	-+++++++?+++-+++--+++-++++++++--++++-++--++++--+---+-?++++-++--+-++-+--?++-+	0.06865	20.5035	289335	4.124	3.717e-05	0.1018	22.8517	1.843	0.06532	0.1567	21.0489	3.666	0.0002466	0.3357	11.426	0.3357	11.426	-0.0083829	0.0017449	1.55382e-06
17	56945430	rs11079365	T	C	0.3751	-7.498	6.487e-14	-++??+++?+?+-++-?+???????+-++??-++-?-+?++?????????+-????+---+++++????-+?++++	0.2009	15.1648	250826	2.511	0.01204	0.2967	9.9121	NA	NA	NA	NA	7.748	9.343e-15	0.6786	0	0.6786	0	0.0053141	0.0017418	0.00228087
20	47642476	rs13041022	A	G	0.3225	7.498	6.491e-14	-+-+------+-++--+-+---+--++---+-+-++--+-+--+--+-++-+-++--+---+----++--++----	0.1106	16.903	300486	-4.655	3.242e-06	0.5633	0	-1.571	0.1161	0.009205	41.4428	-5.171	2.323e-07	0.889	0	0.889	0	0.0083901	0.0017449	1.52195e-06
20	47644032	rs6019595	A	G	0.6775	-7.497	6.523e-14	---+++--+-+++-+?++++++-++-------+-++-+-+---++-++++----+-+++++---------++----	0.1132	16.8175	300127	-3.564	0.0003647	0.1732	17.3168	-1.046	0.2954	0.08531	27.002	-4.768	1.865e-06	0.9898	0	0.9898	0	-0.0083907	0.0017449	1.5195e-06
17	56901713	rs12602346	T	C	0.3753	-7.496	6.567e-14	???++???------?-++----++--?-+-++---+?-+--------+++?---+-???-+????+++--++-+--	0.6559	0	274440	-4.907	9.266e-07	0.493	0	-2.838	0.004534	0.7645	0	-4.594	4.34e-06	0.2567	25.816	0.2567	25.816	0.0053449	0.0017418	0.0021508
1	41814308	rs12048808	C	G	0.2225	-7.496	6.575e-14	+-+++--++-++-++-+-+++-++++++++-+++--++--++-+-++---?+-+++++++-+++----+++-++++	0.0375	23.7444	300049	4.467	7.918e-06	0.08409	24.5371	-0.316	0.7521	0.2444	14.168	6.219	5.017e-10	0.2815	21.466	0.2815	21.466	0.0004163	0.0017225	0.809025
20	47642579	rs7262379	A	G	0.6775	-7.496	6.579e-14	+++----+-++---+++-+-+--+-++---+-----+--+---+---++--++-++---+-+-----+---+--+-	0.8735	0	300486	-2.584	0.009753	0.8675	0	-0.777	0.4373	0.697	0	-5.241	1.595e-07	0.3894	0.497512	0.3894	0.497512	-0.0083907	0.0017449	1.5195e-06
16	28531353	rs240702	T	C	0.4103	-7.496	6.58e-14	???++++?-----?+-++---+++--?-+-++---+?----------+++----+-???-+???-++---++-+--	0.6621	0	277116	-4.414	1.015e-05	0.5263	0	-2.815	0.004882	0.7082	0	-4.545	5.483e-06	0.2579	25.6321	0.2579	25.6321	-0.0022701	0.0017389	0.191734
1	32108579	rs7524405	A	C	0.623	7.496	6.583e-14	-++--+++++++++++------+-+-----++++-+-++-++-++-+-----+-+++++-++++---++-+-++++	0.2879	7.81711	300486	3.489	0.0004855	0.422	2.68587	0.141	0.8882	0.1976	17.4123	4.702	2.571e-06	0.7045	0	0.7045	0	-0.0021624	0.0017471	0.215819
17	56908987	rs7209253	T	C	0.6247	7.496	6.586e-14	++-+----+-------+-+++-+----++-+++--++-+-----+-+--+-++---++-+----++--+-++----	0.1891	12.376	300486	-2.664	0.007726	0.2987	9.50226	-0.589	0.5557	0.1731	19.2289	-5.258	1.455e-07	0.6681	0	0.6681	0	-0.0052854	0.0017418	0.00240935
16	28603335	rs762634	T	C	0.6428	7.496	6.587e-14	-+++-+-++-++++----+-+--+--++++++++-+-+--+++++---+----+++++-++---+++++++-++-+	0.3585	4.86821	300486	2.04	0.04133	0.7213	0	1.229	0.2192	0.1633	19.9787	5.405	6.479e-08	0.3019	17.7857	0.3019	17.7857	0.0019712	0.0017366	0.256336
17	56762655	rs159980	A	G	0.394	-7.496	6.598e-14	+-+-++++++-+--++-+-+++-++--+++-+-+--++-+-++-++-+--+-+--++-+++-++++--++--++++	0.1109	16.88	300486	4.516	6.306e-06	0.5539	0	1.556	0.1197	0.009544	41.2732	5.16	2.474e-07	0.8881	0	0.8881	0	0.0051536	0.0017412	0.00307964
17	56948722	rs9902994	A	T	0.6249	7.495	6.621e-14	+++++-++++---+++-+-+-+++-?++-+-+-++-++-+-+-+++++--+++++++++-++++++--+---++++	0.676	0	300108	2.817	0.004845	0.4999	0	2.364	0.01808	0.5792	0	4.13	3.629e-05	0.8019	0	0.8019	0	-0.0053105	0.0017417	0.00229668
20	47671538	rs6019618	T	C	0.6772	-7.495	6.655e-14	+++----+-++-----+-+-+--+-++---+-----+--+---+-+-++-?+0-++---+------+----+--+-	0.6876	0	300049	-2.644	0.008183	0.7433	0	-0.66	0.5093	0.6386	0	-5.648	1.623e-08	0.2065	34.2826	0.2065	34.2826	-0.0083257	0.0017449	1.82894e-06
17	56938016	rs4132925	C	G	0.3752	-7.494	6.658e-14	-++---+--+--+-+++----++-++++++-+++---++++0+++++++-+----++-+++-+-++--+++-++-+	0.7641	0	300486	4.867	1.133e-06	0.4358	1.92232	0.148	0.8824	0.9127	0	4.449	8.634e-06	0.8483	0	0.8483	0	0.0053436	0.0017417	0.00215526
3	49938227	rs3774758	C	G	0.4926	7.493	6.711e-14	---++++-+--+++++-+-+-+--+--+++-++++++++-+++-+-+--++-++-+-++-+-++++-++-+-++-+	0.2509	9.44435	300486	1.991	0.04653	0.494	0	0.673	0.5012	0.3422	7.84826	6.59	4.399e-11	0.4258	0	0.4258	0	0.0048057	0.0017502	0.0060381
20	47646621	rs6095401	A	G	0.3209	7.493	6.728e-14	-+--+-+-++-++--+---+++------------+-+-+-------+-----+-+----+--++++-++-------	0.2253	10.6196	300486	-2.419	0.01556	0.3353	7.45882	-2.146	0.03184	0.2349	14.8114	-5.202	1.969e-07	0.3251	13.4699	0.3251	13.4699	0.0083642	0.0017449	1.63946e-06
20	47643554	rs6019594	C	G	0.6774	-7.493	6.729e-14	+---+---?---+---++---++-------++----+---+--++++-+++--?----++-++----+-++?--+-	0.002675	34.505	289335	-4.514	6.371e-06	0.005771	39.8686	-1.849	0.06447	0.06173	30.5797	-3.733	0.0001892	0.3975	0	0.3975	0	-0.0083415	0.0017449	1.74944e-06
6	108861264	rs1575676	T	C	0.3778	-7.493	6.754e-14	???--???+++++?-+--++++--++?+-+--+++-?++++++++++---?+++-+???+-????--+++--+--+	0.6349	0	275414	4.666	3.073e-06	0.4922	0	2.811	0.004945	0.7131	0	4.618	3.884e-06	0.25	26.9718	0.25	26.9718	0.011183	0.0017577	1.98793e-10
17	57165097	rs7502208	A	G	0.6276	7.492	6.79e-14	---++----++--------+-+++--+--+++++----+---+-+-+++--+-----+--+---++++-+------	0.5126	0	300486	-2.744	0.006079	0.1793	16.7326	-0.279	0.7803	0.8674	0	-5.251	1.509e-07	0.8104	0	0.8104	0	-0.0055356	0.0017419	0.0014832
17	57016525	rs7207693	T	C	0.6257	7.491	6.811e-14	----+-++++--+--+--+++-+++++-+-+-+---++-++-----+-++++-+-+++-+++----++-++-++++	0.01714	27.3199	300486	1.613	0.1068	0.1291	20.3489	-0.725	0.4687	0.2628	12.9476	6.61	3.838e-11	0.2511	26.7757	0.2511	26.7757	-0.0053865	0.0017419	0.00198564
6	28150878	rs34832585	T	C	0.1025	7.491	6.815e-14	+++-+----+-++--+?-+?-+++-++--++---++--+--+-++--------?--++-++---+------?----	0.1091	17.3967	298232	-3.037	0.002392	0.334	7.53155	0.59	0.5555	0.2605	13.8331	-6.32	2.616e-10	0.2707	23.3716	0.2707	23.3716	-0.0038423	0.0017401	0.0272396
17	56884581	rs6503878	T	G	0.3771	-7.49	6.904e-14	+-+++--++-++-++--++++-++++++---+-+--?+-++--+-++---++-+-+++++--++----+++-++++	0.00316	33.6466	298560	4.032	5.533e-05	0.1071	22.3788	-1.103	0.2701	0.02106	37.1557	4.981	6.324e-07	0.1769	39.1604	0.1769	39.1604	0.005333	0.0017418	0.0022009
17	57013803	rs4372750	A	C	0.6257	7.488	6.974e-14	+++----+-++-----+-+-+-+++++---+--------+---+-+-++--+--+-+--+-+----+--+-+--+-	0.2598	9.04681	300486	-1.898	0.05768	0.5017	0	-0.668	0.5041	0.3649	6.41378	-6.575	4.854e-11	0.4222	0	0.4222	0	-0.0053838	0.0017419	0.00199664
16	28532188	rs62034319	T	G	0.5898	7.488	6.998e-14	+---+-+---+-+--+?-+??+++--++-+++---++------++-+--++++?+++++++------+---?----	0.4063	2.99738	298129	-2.521	0.01171	0.4977	0	1.233	0.2174	0.8022	0	-6.359	2.032e-10	0.8435	0	0.8435	0	0.0023599	0.0017389	0.174735
16	28526897	rs153106	T	C	0.5897	7.488	6.999e-14	???---+----+-++--?-+-++---??-+--+---+-+--+-+++-+-+---------+---?-+++--------	0.2494	9.91826	284430	-3.29	0.001002	0.5038	0	0.018	0.9854	0.3786	5.55346	-6.72	1.816e-11	0.1929	36.5348	0.1929	36.5348	0.002236	0.0017391	0.198527
20	47669980	rs73611328	T	C	0.6773	-7.487	7.049e-14	++--+--+?++-----+-++++-+-+?+-++-----+----+--+--++++------+-----+----+++-----	0.3498	5.2846	288848	-2.328	0.01993	0.4026	3.80477	-1.158	0.2467	0.2605	13.0964	-5.221	1.778e-07	0.7763	0	0.7763	0	-0.0083262	0.0017449	1.826e-06
17	56929533	rs9901236	A	G	0.3761	-7.486	7.086e-14	-+-++++------+-++--++++++-+-+-+---++++-++--++-----+-+++--+++-----+-+-+-+--+-	0.8933	0	300486	-2.567	0.01025	0.7116	0	-0.797	0.4252	0.9227	0	-4.942	7.723e-07	0.2635	24.642	0.2635	24.642	0.0053368	0.0017417	0.00218323
16	28608341	rs762633	T	C	0.6389	7.486	7.091e-14	+-+-+-----+++--++-+--++++-+-+++----+--+--+--+----+-++?+-+++-+++--+---+-?--+-	0.6003	0	298407	-2.584	0.009772	0.737	0	0.95	0.3421	0.6667	0	-5.782	7.376e-09	0.6587	0	0.6587	0	0.0020008	0.0017358	0.249041
17	56917543	rs6503883	T	C	0.6247	7.486	7.117e-14	---++------+--+-+-+++++++---+---+--+---++---+-++-----+0-++-----+++++-+-+--+-	0.3585	4.86821	300486	-4.489	7.171e-06	0.5515	0	-0.979	0.3277	0.2032	17.0102	-3.799	0.0001452	0.4535	0	0.4535	0	-0.00527	0.0017418	0.00248085
20	47663368	rs3817652	A	G	0.6773	-7.485	7.139e-14	---++++-+--+++++-+-+-+-----+++-++++++++-+++-+-+--++-++-+-++-+-++++-++-+-++-+	0.2772	8.28381	300486	1.957	0.0504	0.496	0	0.729	0.466	0.3618	6.60897	6.57	5.048e-11	0.5129	0	0.5129	0	-0.0084013	0.0017449	1.47435e-06
6	108876002	rs768023	A	G	0.6167	7.485	7.15e-14	++++-+++++-+--++-+++-+--+-++-++--+-+-++-+-+--+----+--+--++-+-++++-+++++-++-+	0.09423	18.0597	300486	4.047	5.188e-05	0.3375	7.33448	-1.357	0.1747	0.2449	14.1336	4.795	1.623e-06	0.3095	16.388	0.3095	16.388	-0.010808	0.0017679	9.77462e-10
20	47666027	rs6090940	T	G	0.3231	7.485	7.167e-14	-+++-++-+++-+++--++--+++------+-+--++-+--+--+-+++-+-+----++-----+----+++----	0.5061	0	300486	-2.237	0.02526	0.6734	0	0.159	0.8738	0.6876	0	-6.253	4.024e-10	0.2277	30.7639	0.2277	30.7639	0.0083401	0.0017449	1.75711e-06
17	57179238	rs11868348	T	C	0.6277	7.481	7.354e-14	---------+++++-+-+--+-+--+--------+-+-+--+----+-+------++-+++----+++-+------	0.006249	31.2293	300486	-2.765	0.005686	0.675	0	-0.644	0.5198	0.0009557	49.8881	-7.315	2.583e-13	0.1351	46.0335	0.1351	46.0335	-0.0056096	0.001742	0.00128145
20	47667342	rs6012591	T	C	0.6773	-7.481	7.358e-14	+---+------+---++-+-+-++--+---+----+--++-+--+++--++-+?--+-++-----++---+?--+-	0.5044	0	298407	-4.052	5.082e-05	0.6512	0	0.996	0.3192	0.5832	0	-5.142	2.724e-07	0.4627	0	0.4627	0	-0.0083256	0.0017449	1.82936e-06
20	47668383	rs2869694	T	C	0.3227	7.481	7.383e-14	+++--+-+--++----++++--++------+-+--++-+----+-+---+-+-+++---------++----+----	0.7058	0	300486	-4.921	8.606e-07	0.9538	0	0.866	0.3867	0.5969	0	-5.277	1.316e-07	0.1523	43.2033	0.1523	43.2033	0.0083259	0.0017449	1.82768e-06
16	28580829	rs56396270	T	C	0.3614	-7.48	7.405e-14	-+-++++++--+++-+-+++-++++--+++++-++++++-+-++++--++++++0+++++++-++++-+--+++-+	0.9744	0	300486	2.953	0.003149	0.9603	0	1.918	0.05505	0.8795	0	4.962	6.979e-07	0.1477	43.9567	0.1477	43.9567	-0.0020303	0.0017365	0.24232
4	106221741	rs2454203	A	G	0.4196	7.479	7.463e-14	+---?----+--+--+?-+??++?--+--+++--+++-----+++-+--+-+-?+--+++------++-+-?----	0.01848	28.0484	297876	-2.689	0.007177	0.3876	4.5756	1.447	0.1478	0.09754	28.4069	-7.453	9.143e-14	0.5941	0	0.5941	0	0.0045298	0.0017431	0.00935837
20	47667237	rs6012590	T	C	0.3227	7.479	7.466e-14	-++-+++++-+++++--+-++-+--+++-0--+++--++++-+-+++--+-++++-+++-+++-+--+++--++++	0.4612	0.697764	300486	3.032	0.002427	0.7829	0	1.115	0.2647	0.27	12.4726	5.173	2.304e-07	0.06387	58.7175	0.06387	58.7175	0.0083256	0.0017449	1.82894e-06
20	47677162	rs6012592	A	C	0.3218	7.477	7.619e-14	-+++-++-+++-+++--++--+++------+-+--++-+--+--+-+++-+-+----++-----+----+++----	0.5222	0	300486	-2.207	0.02732	0.6499	0	0.01	0.9922	0.7161	0	-6.271	3.597e-10	0.2325	29.9393	0.2325	29.9393	0.0083578	0.0017449	1.67032e-06
17	56609525	rs11869828	A	G	0.3748	-7.473	7.854e-14	-+++-+++++-+-++-?+-??--?++-+++--++--++++++---+-++-+--?-++-+-+++++++-+++?++++	0.04728	23.1343	297982	3.212	0.00132	0.3753	5.25368	-1.427	0.1535	0.2796	12.8762	7.699	1.367e-14	0.6261	0	0.6261	0	0.0052602	0.0017412	0.00252
6	26479150	rs16891725	T	C	0.1251	7.469	8.075e-14	+-+-+-++-+--+++-+--++-+-++-++++-++---+++-----0--+-+--++++--+-+-++---+-++++-+	0.1039	17.3645	300486	3.284	0.001024	0.5808	0	-0.878	0.3799	0.2535	13.5596	7.082	1.423e-12	0.1249	47.7534	0.1249	47.7534	-0.003233	0.0017608	0.0663437
17	56766831	rs302876	T	C	0.3759	-7.468	8.133e-14	???---??---+-++--?-+-++++-??-+--+--++-+--++++-++-+?--------+?-?+++++--------	0.2229	11.4775	282077	-2.34	0.01927	0.5209	0	0.227	0.8201	0.5382	0	-6.937	3.995e-12	0.1333	46.3327	0.1333	46.3327	0.0051787	0.0017417	0.00294578
20	47665825	rs6090939	A	G	0.6773	-7.468	8.162e-14	-+--+++---+-+++-++-++--+-----+-++---+---+--++--++++-++---+--+-----+----+----	0.488	0	300486	-2.444	0.01453	0.6919	0	-1.121	0.2625	0.2751	12.142	-5.589	2.29e-08	0.4578	0	0.4578	0	-0.0083422	0.0017449	1.74663e-06
20	47655768	rs6019609	C	G	0.6774	-7.467	8.196e-14	-++---++++++-++++-++-+++++++++-+-+--++--+++++++++---+-+-+-++-+-++---++++++++	0.8093	0	300486	3.168	0.001536	0.7317	0	0.633	0.5267	0.6162	0	5.244	1.574e-07	0.8187	0	0.8187	0	-0.008369	0.0017449	1.61696e-06
20	47677185	rs66501340	T	C	0.6775	-7.467	8.223e-14	-+++-+-++-++++----+-+-----++-+-+++-+-+-+++++++--++---+-+++-+-----++++++-++-+	0.2295	10.42	300486	2.218	0.02655	0.4659	0.241913	1.334	0.1821	0.1882	18.1022	5.453	4.949e-08	0.2525	26.5426	0.2525	26.5426	-0.0083578	0.0017449	1.67032e-06
6	108867031	rs6911407	A	C	0.3788	-7.467	8.234e-14	+---+-+--+--+--+--+--+++--+---++---+-------++-+--+-++?+-+++++---++-++-+?----	0.221	10.9474	298407	-2.01	0.04446	0.7484	0	1.157	0.2471	0.2435	14.6107	-6.484	8.947e-11	0.7926	0	0.7926	0	0.010887	0.0017571	5.8023e-10
17	56889952	rs9807057	A	C	0.3753	-7.466	8.258e-14	-+-+-+-++++--++-++-++-+-++-++--+++---++++++----++-++-?++--+--+++-++++++?++++	0.09725	18.0401	298407	2.366	0.01798	0.07184	25.5786	-0.553	0.5805	0.5467	0	5.618	1.935e-08	0.7151	0	0.7151	0	0.0052911	0.0017418	0.00238451
17	56868856	rs8067571	T	C	0.624	7.466	8.261e-14	---++--+--++++--+---+++++----++++--+----+-+-+----+-----++++-+-+-+++++-+---+-	0.5077	0	300486	-3.741	0.0001831	0.3876	4.5756	-0.467	0.6403	0.4918	0	-4.254	2.097e-05	0.764	0	0.764	0	-0.0052832	0.0017418	0.00241936
17	57015017	rs111415280	A	C	0.3758	-7.466	8.292e-14	+-+-+-++?+--+++-----+-+-++-+++--++---+++-----+--+-+--+++-+-+-++++---+-++++-+	0.08242	19.0832	291414	3.998	6.397e-05	0.741	0	-1.063	0.2876	0.1056	24.9324	7.473	7.829e-14	0.2162	32.675	0.2162	32.675	0.0053923	0.0017418	0.00196336
20	47673002	rs3795082	C	G	0.3224	7.464	8.412e-14	-+-??++-+++--+++?++???++++-++-++-++-+++++++--++-++++--++++-+--++--++-+-+++-+	0.1013	18.1689	299874	3.314	0.0009208	0.1372	19.7239	1.643	0.1004	0.1223	25.4496	5.14	2.748e-07	0.5957	0	0.5957	0	0.008337	0.0017449	1.77256e-06
17	56783623	rs304281	A	G	0.375	-7.462	8.527e-14	???++???++++-?+-?+-?----+-?+----+++-?-+-+--+-+-++-?--?-+???-+????++-+-+?++++	0.003514	37.3412	273160	2.151	0.03147	0.2362	16.2967	-1.593	0.1111	0.05231	32.7801	7.502	6.296e-14	0.9966	0	0.9966	0	0.0051217	0.0017417	0.00327567
17	56854441	rs999431	A	G	0.3768	-7.462	8.528e-14	-+++++++-+--+++++++++--++-?+++-+-+++++++++-+-++++---+--+-++--+++++--+-++++++	0.6478	0	297920	4.681	2.859e-06	0.236	13.2832	1.308	0.1909	0.9717	0	3.061	0.002204	0.3184	14.7243	0.3184	14.7243	0.0052423	0.0017419	0.00261698
17	57185807	rs8082544	A	G	0.3721	-7.462	8.546e-14	-+++-+--+--++----+++++-+----+---+---+---+--+-+-+-+?-+-+--++??--+-+++-+------	0.05613	21.7434	298659	-3.272	0.001068	0.3317	7.88458	-0.519	0.6035	0.01635	38.5661	-4.604	4.153e-06	0.6634	0	0.6634	0	0.00557	0.001742	0.00138644
17	57162464	rs8072712	A	T	0.3721	-7.461	8.57e-14	--++---+++++++-++-++---+--+-+-++-+--+++--+----++--++++++++-+-+++---++---+-++	0.3369	5.75758	300486	3.507	0.0004535	0.521	0	0.032	0.9748	0.2236	15.5857	4.61	4.027e-06	0.4953	0	0.4953	0	0.0055367	0.0017417	0.00147843
17	57006284	rs12232477	T	C	0.3749	-7.46	8.645e-14	???+????+-++-++-?+-??--?++?++---++--?++++----+-++-?--?-++--++????++++-+?++++	0.007915	34.116	278163	2.265	0.02353	0.7921	0	-1.57	0.1165	0.02018	40.9242	8.145	3.778e-16	0.851	0	0.851	0	0.0053855	0.0017419	0.00198976
17	56802141	rs304270	T	C	0.6238	7.46	8.653e-14	???+-+??+-+-+--++?+++--+-+??++++-+++-+-+++--++-++-?+++++++--?+?-+---++++++++	0.2651	9.42542	282077	2.151	0.03148	0.7169	0	0.472	0.6372	0.2844	11.5305	6.799	1.053e-11	0.1785	38.9002	0.1785	38.9002	-0.0051915	0.0017421	0.0028827
16	28559363	rs4788079	A	C	0.3595	-7.459	8.69e-14	-++-----++--+--+-+-++--+---++-+---+++------+--++----+-+---+-+-+--+--+++-----	0.2337	10.2269	300486	-1.289	0.1974	0.48	0	-2.821	0.004795	0.2916	11.069	-6.125	9.043e-10	0.8004	0	0.8004	0	-0.0021101	0.001736	0.224166
17	57039513	rs6503889	T	C	0.3747	-7.458	8.811e-14	++-+---+-++-+-+++--+++--+-++++---++-++----++-++++-+-++-+-++-++++-+--++-?++++	0.3565	4.97958	300310	2.634	0.008431	0.3354	7.4524	0.276	0.7825	0.5186	0	5.549	2.866e-08	0.4708	0	0.4708	0	0.005465	0.0017418	0.00170333
17	56776730	rs686425	A	G	0.3761	-7.457	8.844e-14	-+++--+++++++++------+++++-+++--++++++-+++-++----+-+++----++-++++++-++++++++	0.3517	5.14854	300486	5.519	3.409e-08	0.5021	0	0.068	0.946	0.5867	0	3.26	0.001114	0.2581	25.5768	0.2581	25.5768	0.0052521	0.0017417	0.00256567
17	56605360	rs11870671	A	G	0.6251	7.456	8.887e-14	-+--+--+-----+-+--+--++++?------------+---+-------++-+-+---++----+----+-----	0.652	0	300108	-3.934	8.362e-05	0.9108	0	-2.766	0.00567	0.173	19.2333	-5.551	2.834e-08	0.3554	7.55008	0.3554	7.55008	-0.0051735	0.0017415	0.00297167
20	47737958	rs34778847	A	C	0.5919	7.456	8.887e-14	+-----++?+--+--+++-+++-+---++-+---+---+-------++++?---++--+-+-++-+-++-++----	0.2046	11.7419	290977	-1.412	0.158	0.07992	25.216	-1.231	0.2185	0.86	0	-6.866	6.589e-12	0.9472	0	0.9472	0	0.0078596	0.0017408	6.33432e-06
6	108895386	rs2490272	T	C	0.6162	7.456	8.904e-14	???++++?-----?+-++---+++--?-+-++---+?----------+++----+-???-+???-++---++-+--	0.6861	0	277116	-4.415	1.008e-05	0.5519	0	-2.785	0.005348	0.7177	0	-4.526	5.997e-06	0.2615	25	0.2615	25	-0.011062	0.0017671	3.8468e-10
20	47653406	rs6019603	T	C	0.6774	-7.456	8.905e-14	-+++-++-+++-+++--++--+++------+-+--++-+--++-+-+++-+-+----++-----+----+++----	0.5089	0	300486	-2.204	0.02753	0.6443	0	0.053	0.9578	0.6669	0	-6.281	3.357e-10	0.3362	11.3213	0.3362	11.3213	-0.0083829	0.0017449	1.55382e-06
17	57023054	rs9892795	C	G	0.6257	7.456	8.943e-14	???+-???++?+-?+-+--+------?-----++--?++++++--+--+-?--?-+???++????-++++-?++-+	0.178	14.7551	272438	1.903	0.05703	0.376	6.16075	-0.414	0.6789	0.3607	6.9126	5.78	7.484e-09	0.3033	17.5371	0.3033	17.5371	-0.0054039	0.0017419	0.00191999
6	29211556	rs3117337	A	T	0.1077	7.454	9.051e-14	++-++---?+-+---++++++--+-------+---+-----++-+-++-++-+---++-+----+-++-+-+----	0.705	0	291414	-4.38	1.189e-05	0.51	0	-0.687	0.4923	0.6724	0	-5.037	4.72e-07	0.8242	0	0.8242	0	-0.0034419	0.0017408	0.0480176
6	28174757	rs13197633	A	G	0.1026	7.453	9.103e-14	???--???++++++++--++++--++?+-+--+++-?+-++++++++---?+++-+???+-????---++--+-++	0.6943	0	276693	4.813	1.483e-06	0.5458	0	2.819	0.004817	0.7579	0	4.606	4.096e-06	0.2606	25.1497	0.2606	25.1497	-0.0036008	0.0017399	0.0385035
16	28608746	rs35175818	A	C	0.639	7.453	9.148e-14	-++--+-+-+---+----++--++------+-+--+--+----+-+---+-+-+++---------++---++----	0.6809	0	300486	-4.321	1.555e-05	0.9616	0	0.797	0.4252	0.4917	0	-5.391	6.997e-08	0.1194	48.6741	0.1194	48.6741	0.0019978	0.0017358	0.249764
17	57137129	rs2333410	A	G	0.3735	-7.453	9.153e-14	+--------++-----+---++---++-----+---+-++-+---+++------+-----------++-++---+-	0.8705	0	300486	-3.794	0.0001481	0.7459	0	-1.008	0.3134	0.9501	0	-5.716	1.089e-08	0.05158	61.2653	0.05158	61.2653	0.0055476	0.0017424	0.00145312
17	57045160	rs12947785	A	C	0.3745	-7.452	9.186e-14	???--???++++++++--++++--++?+-+--+++-?+-++++++++---?+++-+???+-????---++--+-++	0.6484	0	276693	4.854	1.209e-06	0.4886	0	2.841	0.004501	0.7469	0	4.603	4.156e-06	0.2629	24.7555	0.2629	24.7555	0.005452	0.0017418	0.00174743
16	28562256	rs62034350	A	G	0.6399	7.452	9.197e-14	???+-???++?+-??+++++-++-++?++?----+-?++++++--+-+-+?+++-+???+-????---+--+++++	0.08725	21.1243	271302	2.348	0.01889	0.2112	18.5185	3.016	0.002564	0.1047	25.6802	4.793	1.64e-06	0.4381	0	0.4381	0	0.002145	0.0017359	0.216591
17	56746477	rs302841	C	G	0.6032	7.45	9.322e-14	+---+-+++--++++++++--++++++++--+-++++++++++-++-+-+++-+-+---++--++-+--++++-++	0.05719	21.2731	300486	3.941	8.117e-05	0.07586	25.1427	1.869	0.06163	0.1364	22.1527	4.95	7.43e-07	0.3491	8.78687	0.3491	8.78687	-0.0051599	0.0017409	0.00303669
6	29159629	rs3129173	A	C	0.892	-7.45	9.345e-14	++++-++++++-+-+--+--++++++-+---+++++++-+--+--+----+++++++++-+--++---+-+-++++	0.1337	15.4263	300486	5.858	4.683e-09	0.7115	0	-0.758	0.4484	0.281	11.7543	4.396	1.101e-05	0.03103	66.1896	0.03103	66.1896	0.0034981	0.0017406	0.0444631
6	27274834	rs56114371	T	C	0.0982	7.45	9.351e-14	++++++-+++++-+-+++--+++++-+++----++--+--+-+-+-++-++++--++-++++-++---+++-++++	0.2021	11.7294	300486	4.45	8.599e-06	0.3953	4.15259	-0.127	0.8987	0.2801	11.814	4.612	3.983e-06	0.1792	38.788	0.1792	38.788	-0.0040028	0.0017421	0.0215774
17	57072235	rs8081297	T	C	0.3679	-7.449	9.375e-14	++++++++++----++-+++++++++-+-++--+-++-+-++++-+-+-++++++++-+-++-++++-++--++++	0.8285	0	300486	2.596	0.009436	0.8635	0	3.131	0.001743	0.7212	0	4.122	3.755e-05	0.1647	41.1649	0.1647	41.1649	0.0058169	0.0017422	0.000841589
20	47741556	rs3818262	T	C	0.4079	-7.449	9.404e-14	-+-++++++--+++++-+++--+++--+++++-+++-++-+-++++--++++-+-+++++++-++++-+--+++-+	0.9702	0	300486	3.008	0.002633	0.8539	0	1.37	0.1707	0.9786	0	5.48	4.246e-08	0.1628	41.4634	0.1628	41.4634	-0.0078366	0.001741	6.75772e-06
17	56660279	rs8071916	A	G	0.3747	-7.448	9.451e-14	-++++-++++++-++------++++++++0--++++++--++-++-----?--+----+++++++++-+++-++++	0.09707	17.951	300049	6.179	6.439e-10	0.4542	0.889454	-1.162	0.2454	0.4489	1.08151	2.951	0.003165	0.3853	1.34824	0.3853	1.34824	0.0053008	0.0017416	0.00233722
17	57072701	rs8081967	T	C	0.3675	-7.448	9.465e-14	--+--+-+?++++++-?+-?+?+-+++++-+-++++++-+-+-----++-+-++++-+++++++-+--+++-++-+	0.1646	13.9811	291147	4.647	3.367e-06	0.3811	4.97771	0.898	0.3694	0.1661	20.5859	3.406	0.0006585	0.2367	29.2453	0.2367	29.2453	0.005819	0.0017423	0.000838301
17	56659018	rs6503870	T	C	0.6251	7.448	9.506e-14	++--?-------+--+?-+?++++-++---++--++++-+-++-+++-++?-----+-++--+-+------?----	0.1902	12.6888	299592	-2.181	0.0292	0.3401	7.25989	0.617	0.5372	0.4022	4.18985	-6.252	4.04e-10	0.9352	0	0.9352	0	-0.0053239	0.0017415	0.00223563
17	57022701	rs4500802	A	G	0.3744	-7.445	9.673e-14	-+-++++++--+++++-+++--+++--+++++-+++-++-+-++++--++++++-+++++++-++++-+--+++-+	0.9459	0	300486	2.886	0.003898	0.8072	0	1.304	0.1921	0.9687	0	5.509	3.611e-08	0.1496	43.6514	0.1496	43.6514	0.005384	0.0017419	0.00199526
1	32108547	rs10798882	C	G	0.3774	-7.445	9.696e-14	+-++--+---+-----++-+---+-+----+++----+--+-+++---+---+---+-+-+++-+++---++----	0.03394	24.1305	300486	-3.137	0.001708	0.2461	12.5435	-2.207	0.02731	0.02431	36.3098	-7.683	1.558e-14	0.9167	0	0.9167	0	0.0021149	0.0017466	0.225928
2	155654757	rs2652446	T	C	0.5261	7.445	9.702e-14	++--+--+-+--+--+-+++--++++++++++++--++-+++---+----+-+++++--+++-+----++--++++	0.1771	12.9961	300486	3.7	0.0002155	0.5017	0	0.704	0.4815	0.05696	30.4574	5.769	7.954e-09	0.6756	0	0.6756	0	-0.0024375	0.0017486	0.163335
17	57041699	rs8076121	A	G	0.6257	7.444	9.745e-14	-----+-+?++++++-?+-?+?+-+++++-+-++++++-+-+-----++-+-++++++++-+-+-++-+++-++-+	0.127	16.2054	291147	4.665	3.09e-06	0.3672	5.74702	1.038	0.2994	0.1272	23.8922	3.34	0.0008373	0.1998	35.4144	0.1998	35.4144	-0.0054364	0.0017418	0.00180136
16	28559573	rs4787456	T	C	0.3602	-7.444	9.772e-14	---+++---++------++--++++-+--+++-+-+--++------++-+-+-----------+-+++---+----	0.7095	0	300486	-2.796	0.00518	0.5681	0	0.258	0.7964	0.862	0	-6.132	8.655e-10	0.8347	0	0.8347	0	-0.0021108	0.001736	0.224006
16	28618708	rs11648192	T	C	0.4387	7.444	9.779e-14	-----+---+++++-+-+--+-+--+--------+-+-+--+----+-+-----+++-+++----+++-+------	0.006355	31.1699	300486	-2.75	0.005969	0.6116	0	-0.71	0.4779	0.001666	48.1373	-7.461	8.609e-14	0.1297	46.9402	0.1297	46.9402	0.00071556	0.0017408	0.681036
16	28915433	rs2071342	A	C	0.6514	-7.442	9.894e-14	+---?-+--++----+?-+?-+++--+--+++--++-----++++-+--+--+?+-+-+++---+-+--+-?----	0.01419	28.8784	298126	-3.542	0.0003967	0.1789	16.7568	1.375	0.1691	0.1268	24.6398	-6.863	6.737e-12	0.377	3.10078	0.377	3.10078	0.003167	0.0017354	0.0680143
17	57030561	rs2055779	A	G	0.3744	-7.442	9.945e-14	+--------++-----+---++---++-----+---+-++-+---+++------+------------+-++---+-	0.8918	0	300486	-3.76	0.0001701	0.7062	0	-1.2	0.23	0.9639	0	-5.751	8.874e-09	0.08009	55.595	0.08009	55.595	0.0054392	0.0017418	0.00179226
16	28590989	rs112831778	T	C	0.356	-7.44	1.005e-13	++++-++-+++++-++++-++----+++++++++++++-+++-+++++++--+-+-+++--++++-++++-+++++	0.6292	0	300486	4.31	1.631e-05	0.8714	0	2.694	0.007054	0.1863	18.2405	5.575	2.482e-08	0.3503	8.56446	0.3503	8.56446	-0.0019764	0.0017376	0.255347
16	28559981	rs4788078	A	G	0.3602	-7.44	1.008e-13	-+----+-++-++--+----++-++--+-+----+++-+----+--+---?-+-++---+--++++-++--+----	0.1335	15.527	300049	-1.751	0.07998	0.1746	17.2238	-2.281	0.02257	0.3183	9.36282	-5.965	2.441e-09	0.6481	0	0.6481	0	-0.0021082	0.001736	0.224579
17	56741672	rs2643124	T	C	0.3749	-7.439	1.017e-13	----+------+++--+-+++-----+-+++-------+--+-++-++++--+----+++-++--+-----+-+-+	0.06573	20.4312	300486	-5.81	6.257e-09	0.5685	0	0.052	0.9586	0.1697	19.4847	-4.396	1.101e-05	0.009495	73.8151	0.009495	73.8151	0.0050669	0.0017417	0.0036241
16	28555400	rs4787457	A	G	0.6399	7.439	1.017e-13	--+-++-+++++-+----+-+-+-+-++-+-+++--?-++++++++------++-+++++-----++++++-++++	0.3337	5.92184	298560	2.015	0.0439	0.7182	0	1.215	0.2244	0.1705	19.422	6.166	6.994e-10	0.4734	0	0.4734	0	0.0021214	0.001736	0.221702
6	26500011	rs9393727	C	G	0.8691	-7.438	1.018e-13	---++--+--++++--+---+++++----++++--+----+-+-+----+-----++++-+-+-+++++-+-----	0.4836	0	300486	-3.629	0.0002844	0.3517	6.55079	-0.576	0.5645	0.4687	0	-4.244	2.193e-05	0.8283	0	0.8283	0	0.0035067	0.0017744	0.0481282
20	47676951	rs6090941	A	G	0.3227	7.438	1.019e-13	---++----+-++-+++-+++++-----+-+++--+------+++--+++-+----+----+---++---------	1.233e-05	45.7316	300486	-4.361	1.295e-05	0.006748	38.8893	0.985	0.3245	0.002194	47.2045	-4.883	1.045e-06	0.05384	60.7843	0.05384	60.7843	0.0083578	0.0017449	1.67032e-06
4	106265348	rs2466918	A	T	0.5551	-7.437	1.034e-13	???++++?-----?+-++---+++--?-+-++---+?----------+++----+-???-+???-++---++-+--	0.6239	0	277116	-4.421	9.806e-06	0.5134	0	-2.758	0.005822	0.6608	0	-4.544	5.514e-06	0.2593	25.3731	0.2593	25.3731	-0.0037171	0.0017434	0.0329989
17	56668929	rs2567892	T	C	0.3748	-7.436	1.04e-13	--+-+----++-----+---++---++-----+---+--+-+-+--++------+-+-----+----+-++---+-	0.6532	0	300486	-2.328	0.01993	0.8031	0	-1.409	0.1589	0.5763	0	-6.63	3.362e-11	0.2851	20.8443	0.2851	20.8443	0.0052959	0.0017416	0.00235885
17	56773237	rs302872	A	G	0.3765	-7.435	1.042e-13	---+-++-+-+++++-+--+++------------++--+---+++-++++-+-----++---+-++++--++----	0.1597	13.9237	300486	-3.532	0.0004119	0.453	0.963134	-0.766	0.4434	0.05941	30.1221	-5.705	1.165e-08	0.6358	0	0.6358	0	0.005233	0.0017418	0.00266073
17	57065401	rs7214892	A	G	0.6254	7.435	1.044e-13	--++?+++++++-++-?+-?---++--+++--++----+-+--+---+--?+++-+-+--+--+-++++++?++++	0.2325	10.59	299592	2.101	0.03564	0.3418	7.16496	-0.403	0.687	0.4363	1.86087	6.085	1.168e-09	0.8999	0	0.8999	0	-0.005419	0.0017418	0.00186423
2	155684338	rs2652460	A	G	0.4734	-7.434	1.051e-13	---+-++-+-++-++-+--+++------------++--+---+++-++++-+-----++---+-++++--++----	0.1607	13.8693	300486	-3.69	0.0002247	0.4678	0.137311	-0.713	0.476	0.05494	30.7415	-5.772	7.854e-09	0.6864	0	0.6864	0	0.0022347	0.0017494	0.201456
6	27251379	rs13207082	A	G	0.9016	-7.434	1.055e-13	???--???++++++++--++++--++?+-+--+++-?+-++++++++---?+++-+???+-????---++--+-++	0.6769	0	276693	4.822	1.423e-06	0.5369	0	2.794	0.005202	0.7408	0	4.606	4.099e-06	0.2606	25.1497	0.2606	25.1497	0.0038826	0.0017417	0.0257988
17	56631054	rs2333332	A	G	0.6251	7.433	1.064e-13	???++???-----?+-++---+-+--?-+-+---++?----------+++?---+-???-+????++---++-+--	0.7778	0	275414	-4.237	2.269e-05	0.6788	0	-2.907	0.003655	0.7267	0	-4.655	3.233e-06	0.2855	20.7607	0.2855	20.7607	-0.0052953	0.0017415	0.00236102
3	52785238	rs7646741	A	G	0.503	-7.432	1.067e-13	-++++-++++++-++------+++++++++--++++++--++-++-------------+++++++++-++++++++	0.04836	22.2387	300486	5.945	2.758e-09	0.2246	13.8395	-1.013	0.3113	0.3568	6.92768	3.157	0.001594	0.4055	0	0.4055	0	0.00026303	0.0017411	0.87992
17	56608465	rs4793952	T	C	0.3748	-7.431	1.076e-13	+--++-+-+-+++-++++-+++--++++++-+-++-++-++++-+-+++-+-+---+++++++++--+++--++++	0.7545	0	300486	4.369	1.246e-05	0.9622	0	-0.725	0.4686	0.5698	0	5.041	4.631e-07	0.1349	46.0723	0.1349	46.0723	0.0052653	0.0017415	0.00249919
20	47541517	rs6019535	A	G	0.3237	7.431	1.081e-13	----+-+-+-+++-++----+-+--+-----++---+++------+---++-------+---+--++----+----	0.3708	4.36479	300486	-3.15	0.001633	0.4344	1.99922	-2.624	0.008698	0.2584	13.2371	-4.485	7.298e-06	0.5536	0	0.5536	0	0.0083273	0.0017449	1.82138e-06
17	56749628	rs304264	A	G	0.395	-7.43	1.085e-13	-+++?++++--+--+-?+-?+---++-+++--++--+++++--+-+-++-++-?-0-+---+++---++++?++++	0.06597	20.9959	298126	3.539	0.0004021	0.4713	0	-1.653	0.0983	0.2348	15.8929	6.578	4.768e-11	0.2773	22.2193	0.2773	22.2193	0.0050795	0.0017409	0.00352533
3	23966425	rs7633520	T	G	0.2782	-7.43	1.085e-13	--+-?+++++++-++-?+-?---?++-+++--++---++-+--+-+-++--+++++-+-++-++--+---+?++++	0.1019	18.0165	299882	2.282	0.02247	0.5959	0	-1.18	0.2378	0.1055	26.7099	6.137	8.424e-10	0.7281	0	0.7281	0	0.0050662	0.0017676	0.00415432
17	56993320	rs6503887	T	C	0.3748	-7.429	1.09e-13	++++-----++-+-++++-+++--+-++++-+-++-++----++-++++-?-++-+-++-++++-+-+++-?++++	0.432	1.89754	299873	2.551	0.01076	0.4001	3.91959	0.123	0.9024	0.5726	0	5.675	1.389e-08	0.6188	0	0.6188	0	0.0052451	0.0017418	0.00260196
17	44025888	rs242559	A	C	0.7695	7.429	1.098e-13	???++++?-----?+-++---+++--?-+-++--++?----------+++----+-???-+???-++---++-+--	0.6553	0	277116	-4.384	1.166e-05	0.5619	0	-2.883	0.003933	0.6951	0	-4.53	5.904e-06	0.2109	33.5695	0.2109	33.5695	-0.0010882	0.0017451	0.532918
17	56611920	rs2009948	A	C	0.6253	7.428	1.099e-13	---+++----+++-+?-++-++++----------++---+---++--+++++--+-----+-----+----+----	0.5435	0	300127	-4.566	4.962e-06	0.4968	0	-0.684	0.4938	0.4721	0	-5.323	1.02e-07	0.6311	0	0.6311	0	-0.0052991	0.0017417	0.00234639
17	56834229	rs304296	T	G	0.6243	7.427	1.114e-13	--+---+--------+------+---+--+++-+++-++---++--+++++--+++----+-+----+++++----	0.3715	4.33795	300486	-2.088	0.03684	0.9064	0	0.371	0.7109	0.3149	9.57591	-7.298	2.923e-13	0.5399	0	0.5399	0	-0.0051905	0.0017418	0.00288403
16	28754684	rs378421	A	G	0.4045	-7.427	1.114e-13	++--+-+---+--+-+-++++--+-+--+++++-++?-+---++--++++--++--++-+----++++--++----	0.7534	0	298560	-2.965	0.003025	0.6782	0	0.914	0.3606	0.9551	0	-6.424	1.326e-10	0.6566	0	0.6566	0	-0.0026551	0.0017383	0.12666
16	28558081	rs4788080	T	C	0.3602	-7.426	1.117e-13	+++----++-+-++-------+-+++-+-+---++-+++-++---++---+-++++-++++-+++--+++++++++	0.0003762	39.1629	300486	4.411	1.028e-05	0.08592	24.1145	-1.276	0.2019	0.005158	43.9776	5.238	1.623e-07	0.08559	54.5867	0.08559	54.5867	-0.0021136	0.0017359	0.223398
20	47739193	rs3795081	A	G	0.4079	-7.425	1.124e-13	???++???-----??-++---+++--?-+-++--++?-----------++?---+-???-+????+++-+++-++-	0.2243	11.9759	273161	-3.939	8.174e-05	0.08015	30.9067	-2.157	0.03098	0.5611	0	-4.481	7.437e-06	0.2424	28.264	0.2424	28.264	-0.007847	0.0017409	6.5675e-06
3	52541253	rs11130306	A	G	0.5135	7.425	1.127e-13	-++---++--++---+------+--+----+--------+-+--+-+-+--+--++-+-++-+--+++---+--+-	0.1911	12.2776	300486	-5.474	4.402e-08	0.05974	26.9873	-0.589	0.5557	0.7145	0	-5.727	1.022e-08	0.5818	0	0.5818	0	-0.0016017	0.0017523	0.360678
17	57041119	rs7218105	A	G	0.3743	-7.425	1.129e-13	-+-+++--?-++---+-+---+++--+---++--+++---+++++-++--?-+----++-+++--+++-+----+-	0.0879	18.7517	290977	-2.747	0.00601	0.3554	6.46614	0.144	0.8858	0.1797	18.7278	-5.455	4.908e-08	0.06096	59.3	0.06096	59.3	0.0054177	0.0017417	0.00186767
20	47658064	rs11905116	A	G	0.678	-7.424	1.136e-13	-+--+--+-----+++--+--++++?------------+---+-------++-+-+---++----+----+-----	0.6348	0	300108	-3.909	9.265e-05	0.8816	0	-2.565	0.01031	0.188	18.1133	-5.614	1.976e-08	0.3464	9.33817	0.3464	9.33817	-0.008387	0.0017449	1.53568e-06
3	52720080	rs1108842	A	C	0.5014	-7.424	1.139e-13	??++-+-++++-+--++?++---++++++-++-+++-+-++++-----+-++++-++++-+++-+---++++++++	0.1992	12.0815	297576	4.156	3.238e-05	0.231	13.8754	-0.107	0.9148	0.6263	0	7.11	1.163e-12	0.2144	32.9759	0.2144	32.9759	0.0002439	0.0017423	0.888667
17	56728102	rs302842	C	G	0.3747	-7.424	1.139e-13	--+---+--------+------+---+--+++-+++-++---++--+++++--+++----+-+----+++++----	0.2887	7.78311	300486	-2.107	0.03513	0.8404	0	0.46	0.6458	0.2998	10.5412	-7.322	2.442e-13	0.5949	0	0.5949	0	0.0052311	0.0017414	0.00266563
20	47661470	rs6095407	C	G	0.3232	7.423	1.144e-13	???+-???++++-?+-++-++---++?++--+++--?+++++---++-++?+-?-+???-+????+-+-+-?++++	0.1245	18.0688	273335	1.954	0.05067	0.9344	0	-0.294	0.7688	0.02671	36.6129	6.348	2.177e-10	0.6238	0	0.6238	0	0.0083626	0.0017449	1.64702e-06
3	52722335	rs3774349	A	C	0.5016	-7.422	1.155e-13	+-+---++?+--+++-+-+++---++-+++--++---++------+--++++-++++--+--+++---+---++-+	0.03242	24.4929	291414	3.197	0.001388	0.3568	6.32881	-0.389	0.6971	0.0478	31.8027	6.029	1.652e-09	0.1373	45.6719	0.1373	45.6719	0.00022148	0.0017423	0.898845
6	108905680	rs2802290	A	G	0.6168	7.421	1.158e-13	-----------+++--+-+++-----+-+++-------+--+-++-++++?-+----+++-++--+-----+-+-+	0.06183	20.9216	300049	-5.681	1.337e-08	0.4909	0	-0.047	0.9629	0.1722	19.2897	-4.369	1.247e-05	0.0121	72.5601	0.0121	72.5601	-0.011032	0.0017643	4.03738e-10
17	56736473	rs654778	A	C	0.376	-7.422	1.158e-13	+++-+--+++++-+-+-+++++--+++++++-++++-+-++++-+++-+-++++-+-+++-+------++--+-++	0.492	0	300486	3.766	0.0001656	0.7212	0	3.04	0.002363	0.3553	7.01999	3.558	0.0003733	0.1426	44.7921	0.1426	44.7921	0.0051304	0.0017417	0.00322255
17	56673079	rs302840	C	G	0.3748	-7.421	1.164e-13	???++???------??+?----++--??+-++--++?----------+++?---+-????+????+++--++-+--	0.6945	0	267024	-4.11	3.958e-05	0.501	0	-2.924	0.003458	0.75	0	-4.459	8.238e-06	0.3007	18.0104	0.3007	18.0104	0.0053153	0.0017416	0.00227353
17	56611372	rs12453049	T	C	0.3746	-7.42	1.167e-13	???++???------+-++----++--?-+-++---+?-+--------+++?---+-???-+????++---++-++-	0.5845	0	276693	-4.824	1.411e-06	0.3957	4.70518	-2.866	0.00416	0.7435	0	-4.64	3.48e-06	0.2514	26.7399	0.2514	26.7399	0.0052915	0.0017416	0.00237958
17	56675861	rs437732	A	C	0.3747	-7.42	1.174e-13	---++-----++++++-+-+----+--+++-+++-+-++-++--+-+--++--+---+--+-+++++-+-+-++++	0.5027	0	300486	1.921	0.05474	0.7251	0	0.825	0.4095	0.4844	0	6.494	8.341e-11	0.4292	0	0.4292	0	0.0051464	0.0017415	0.00312464
17	56838472	rs304299	C	G	0.3757	-7.42	1.175e-13	----+-+-+++-+-++-+-+-+++++--+-++--+---+++---++--+++++--+---------+----------	0.01037	29.3659	300486	-1.706	0.08802	0.3114	8.79033	-0.488	0.6256	0.02529	36.0723	-7.266	3.695e-13	0.4038	0	0.4038	0	0.0051887	0.0017418	0.00289334
17	56686454	rs302848	A	G	0.625	7.419	1.176e-13	-+-++---?+-+---++++++--+-------+---+-----++-+-++-++-+---++-+----+-++-+-+--+-	0.7149	0	291414	-4.472	7.749e-06	0.5041	0	-0.821	0.4116	0.6961	0	-4.956	7.194e-07	0.7709	0	0.7709	0	-0.0052109	0.0017415	0.00276949
6	108927842	rs2764261	A	G	0.3841	-7.419	1.177e-13	+++-+--+-+--+--+-+++--++++++++++++--++-+++---+----+-+++++--+++-+----++--++++	0.1728	13.2186	300486	3.693	0.0002212	0.4999	0	0.689	0.4905	0.05652	30.5202	5.709	1.134e-08	0.6327	0	0.6327	0	0.011217	0.0017695	2.31313e-10
6	29153155	rs3130746	A	G	0.892	-7.419	1.184e-13	-+-++++-?-++---+-+---+++--+---++--+++----++++-++----+---+++-+++--+++-+++--+-	0.008601	30.2308	291414	-3.677	0.0002358	0.1986	15.6228	0.599	0.5493	0.02463	36.2326	-6.012	1.829e-09	0.1552	42.7262	0.1552	42.7262	0.0034957	0.0017406	0.044617
3	52687566	rs7612511	T	C	0.5003	7.417	1.194e-13	-+----+--+-++-++---++--+++-+++--+++-++-++-++-++-+-++++++----++-++-+++++-++++	0.2332	10.2506	300486	1.967	0.04914	0.7153	0	1.406	0.1598	0.0386	33.3333	5.401	6.631e-08	0.8844	0	0.8844	0	-0.00026048	0.0017441	0.881278
20	47739814	rs2295714	T	C	0.4085	-7.417	1.199e-13	???++++?-----?+-++---+-+--?-+-++---+?----------+++----+-???-+???-++---++-+--	0.7388	0	277116	-4.335	1.456e-05	0.6585	0	-2.806	0.005021	0.6778	0	-4.635	3.577e-06	0.2898	20	0.2898	20	-0.0078605	0.0017412	6.35331e-06
17	56624291	rs12453459	T	C	0.3749	-7.417	1.202e-13	???-????-+--+--+?-+??++?--?--+++--++?-----+++-+--+?++?+--++??????--+-+-?----	0.009817	33.6978	276773	-2.406	0.01615	0.8197	0	1.568	0.1169	0.02128	40.6022	-8.015	1.103e-15	0.7865	0	0.7865	0	0.0052944	0.0017415	0.00236537
17	56715930	rs450414	A	G	0.3753	-7.417	1.202e-13	-+----+--+-++--+----++-++--+-+----+++-+----+--+---?-+-+----+--++++-++-------	0.1997	11.9163	300049	-1.805	0.07104	0.2657	11.5084	-2.192	0.02837	0.3368	8.18669	-6.02	1.744e-09	0.6458	0	0.6458	0	0.0052942	0.0017414	0.00236483
17	56734695	rs1631237	A	G	0.3747	-7.416	1.203e-13	???++???-----?+-++---+-+--?-+-++---+?-+--------+++?---+-???-+????++---++-+--	0.6836	0	275414	-4.567	4.954e-06	0.5393	0	-2.881	0.003958	0.7191	0	-4.655	3.241e-06	0.2855	20.7607	0.2855	20.7607	0.0051225	0.0017414	0.00326513
17	56727986	rs302843	T	C	0.6252	7.416	1.208e-13	---+-++-+++-+-++---+--++++--+-++--+---+++---++--+++++--+---+---+-+----------	0.0265	25.3486	300486	-1.719	0.08569	0.317	8.47938	-0.667	0.5048	0.06748	29.073	-7.191	6.436e-13	0.4114	0	0.4114	0	-0.0052383	0.0017414	0.00262966
17	56675050	rs391370	A	C	0.3746	-7.416	1.209e-13	+++--+++-+-+-+---+++--++------+-+--++-+----+-+---+-+-+++--------+++---++----	0.6731	0	300486	-3.841	0.0001225	0.9376	0	0.505	0.6136	0.4529	0.829725	-5.536	3.095e-08	0.1515	43.3428	0.1515	43.3428	0.0052709	0.0017415	0.00247229
17	56627733	rs79758284	A	G	0.3742	-7.416	1.21e-13	----+---?--------+-+-?---------+--------+--++++---+--?----+++++----+-+-?--+-	0.01087	29.8058	289243	-4.369	1.249e-05	0.01538	35.4849	-2.424	0.01534	0.111	25.4123	-3.056	0.002243	0.7763	0	0.7763	0	0.0052968	0.0017415	0.00235451
17	56722564	rs2567898	T	G	0.3747	-7.415	1.216e-13	???++++?-----?+-++---+++--?-+-++---+?----------+++-?--+-???-+???-++---++-+--	0.6448	0	275562	-4.309	1.643e-05	0.4971	0	-2.804	0.005044	0.7041	0	-4.55	5.377e-06	0.2543	26.2356	0.2543	26.2356	0.0052337	0.0017414	0.00265277
4	106183474	rs2726458	T	C	0.4137	7.414	1.223e-13	---+-++-+-++-++-+--+++------------++--+---+++-++++-+-----++---+-++++--++----	0.1869	12.4875	300486	-3.649	0.0002635	0.5148	0	-0.715	0.4747	0.05906	30.1692	-5.763	8.271e-09	0.6818	0	0.6818	0	0.0046747	0.0017443	0.00736207
17	57036924	rs4597376	T	C	0.3782	-7.414	1.224e-13	++----+--+-----+---+----------+----+--++-+-+----+-++--++----+---++-+---+--+-	0.5306	0	300486	-4.426	9.607e-06	0.2607	11.6803	-0.237	0.8127	0.8516	0	-4.685	2.804e-06	0.3873	0.924703	0.3873	0.924703	0.0054241	0.0017418	0.00184502
6	108908518	rs2802292	T	G	0.6168	7.414	1.226e-13	++++-++++++---++-+---+++++-+---+++++++-++-+--+----?+-++++---+--++-+++++-+-+-	0.05142	22.0117	300049	5.73	1.002e-08	0.4822	0	-0.047	0.9628	0.1697	19.4825	4.366	1.263e-05	0.009654	73.7326	0.009654	73.7326	-0.011013	0.0017643	4.32315e-10
20	47692827	rs2426115	T	C	0.4075	-7.413	1.233e-13	-----+----++-+---+-+-++--+--+++-+-++--+--+-++--+++-+++---+--++--+++--++--+--	0.08611	18.6824	300486	-3.818	0.0001347	0.5681	0	0.184	0.8538	0.07136	28.5969	-6.135	8.523e-10	0.08949	53.8745	0.08949	53.8745	-0.0079803	0.0017409	4.56457e-06
17	56736659	rs368186	A	G	0.375	-7.412	1.243e-13	-++++-+-++-+-+++-++++-+++++++-+--+--++--+-++--+-++++-+-+++-+------+--++-++++	0.06244	20.7465	300486	2.024	0.04293	0.1031	22.5122	-0.183	0.8548	0.6198	0	6.927	4.302e-12	0.268	23.8579	0.268	23.8579	0.0050563	0.0017417	0.00369573
20	47699657	rs6125536	A	G	0.4071	-7.412	1.246e-13	++++-----++++-++++--++--+-++++-+-++-++----++-++++-?-++-+-+--++++-+-+++-?++++	0.5748	0	299873	2.687	0.007211	0.5259	0	0.405	0.6853	0.6132	0	5.656	1.546e-08	0.5431	0	0.5431	0	-0.0080545	0.0017409	3.71535e-06
6	29182887	rs3130831	A	T	0.1078	7.411	1.25e-13	-+-+++---++----------++++-+--+++---+--++------++-+-+--------+--+-+++-+-+----	0.8023	0	300486	-3.27	0.001076	0.5841	0	-0.259	0.7955	0.8472	0	-6.006	1.907e-09	0.9364	0	0.9364	0	-0.0035047	0.0017407	0.0440758
6	29342775	rs3749971	A	G	0.1124	7.411	1.25e-13	???--???--?-+?-+?-+?++++-+?--++++-++?--+-++-+-+--+?++?+0???+-????--+-+-?----	0.01761	31.0838	272263	-2.238	0.02524	0.4195	3.03133	1.521	0.1282	0.06935	30.8456	-7.043	1.88e-12	0.9954	0	0.9954	0	-0.0035223	0.0017447	0.0435111
3	52770310	rs11130324	T	G	0.4993	-7.411	1.253e-13	+--??+??+---+--??-????+?-+??--+---??--+-++-++-+-+-?+-++++++??--+-++--+++----	0.3429	6.14967	286617	-2.999	0.002711	0.4913	0	0.152	0.8795	0.6191	0	-7.869	3.575e-15	0.9904	0	0.9904	0	0.00023777	0.0017433	0.891516
3	52752959	rs35212380	C	G	0.5065	-7.411	1.253e-13	+++----+-++-----+-+-+-+++++---+--------+---+-+-++--+--+-+--+-+----+--+-+--+-	0.2787	8.21646	300486	-1.957	0.05035	0.6006	0	-0.858	0.3907	0.2867	11.3868	-6.626	3.46e-11	0.4108	0	0.4108	0	0.00020847	0.0017412	0.904699
17	56654690	rs1267542	T	C	0.626	7.41	1.262e-13	???--???++++++-+--++++--++?+-+--+++-?+-++++++++---?+++-+???+-????---++--+-++	0.6461	0	276693	4.847	1.254e-06	0.4714	0	2.867	0.004145	0.75	0	4.609	4.043e-06	0.2831	21.1978	0.2831	21.1978	-0.005474	0.0017416	0.00167186
17	56731270	rs2567912	T	C	0.3755	-7.41	1.262e-13	-----+----+++----+++-+-+------+-+-+++-+---+++--+++-+0+---+--++--++++-++--+--	0.003968	32.7571	300486	-4.101	4.107e-05	0.1343	19.9408	0.007	0.9944	0.01048	40.8284	-5.768	8.008e-09	0.0926	53.3219	0.0926	53.3219	0.0052318	0.0017415	0.00266256
17	56646909	rs1267545	A	G	0.3748	-7.41	1.263e-13	???++???------+-++----++--?-+-++---+?-+--------+++?---+-???-+????++---++-+--	0.5743	0	276693	-4.872	1.107e-06	0.3888	5.19829	-2.836	0.004568	0.7464	0	-4.604	4.148e-06	0.2424	28.2811	0.2424	28.2811	0.0052983	0.0017415	0.00234801
17	56734977	rs2567911	A	G	0.3747	-7.41	1.264e-13	++-----+-+++----+-+-+-++-++---+-----+--+-+-+-+-++--+--+-----------++-+----+-	0.4645	0.56611	300486	-3.268	0.001085	0.8309	0	-0.2	0.8411	0.3624	6.57116	-6.352	2.121e-10	0.09172	53.4739	0.09172	53.4739	0.0051225	0.0017414	0.00326513
20	47662823	rs2252259	T	G	0.4099	-7.41	1.265e-13	???----?+++++?-+--+++-+-++?+-+--+++-?++++++++++---++++-+???+-???+--+++--+-++	0.7153	0	277116	4.369	1.248e-05	0.6171	0	2.832	0.004631	0.6826	0	4.62	3.832e-06	0.2932	19.3765	0.2932	19.3765	-0.0078253	0.0017409	6.96145e-06
6	29163700	rs3116829	A	C	0.1115	7.409	1.27e-13	-+-++---?+-+---++++++--+-------+---+-----++-+-++-++-+---++-+----+-++-+-+--+-	0.7233	0	291414	-4.464	8.049e-06	0.5102	0	-0.784	0.4333	0.7053	0	-4.939	7.838e-07	0.7819	0	0.7819	0	-0.0030528	0.0017438	0.0800018
17	56619581	rs6503866	T	C	0.3747	-7.409	1.276e-13	----+++++--+------+---++-+----+-+--+--++++--+----+?+--+-+--+----+-+---+?----	0.4335	1.83554	299873	-2.576	0.009989	0.4156	3.0526	-0.129	0.8976	0.533	0	-5.652	1.582e-08	0.6854	0	0.6854	0	0.0052949	0.0017415	0.0023632
6	28169241	rs13195291	A	G	0.1027	7.408	1.278e-13	-----++++--+------++-+++++---++-++-+---++---+--+-++-+---+++--+--+-----++----	0.0008382	37.2185	300486	-1.881	0.05994	0.03193	31.1662	-1.648	0.09934	0.01975	37.5208	-7.331	2.283e-13	0.316	15.1824	0.316	15.1824	-0.0036923	0.0017402	0.0338532
20	47757963	rs6063361	T	C	0.4069	-7.407	1.288e-13	---+-+-+++---++++-++--++++--++---++++++-+++-++---++++0++++++++-++++-+--++-++	0.4977	0	300486	4.888	1.017e-06	0.4729	0	2.301	0.02137	0.6301	0	3.194	0.001401	0.2721	23.136	0.2721	23.136	-0.0078994	0.0017407	5.68068e-06
1	32075036	rs10914453	A	G	0.375	-7.407	1.29e-13	-+++?+++++++-++-?+-??---++-+++--++--+++++----+-++--+-?-+---+-++-----+++?++++	0.05783	21.9422	298023	3.953	7.703e-05	0.4709	0	-0.825	0.4093	0.1121	26.4458	7.817	5.426e-15	0.4831	0	0.4831	0	0.0023442	0.0017486	0.180061
6	29181897	rs3130828	A	C	0.1114	7.407	1.291e-13	+-+-+--+----++++-+++--+---++-+++++--++++-+---+++--+++++--++-+-++-+--++--++-+	0.003288	33.3553	300486	3.533	0.0004106	0.1724	17.1963	1.349	0.1773	0.00154	48.3951	5.369	7.896e-08	0.1437	44.629	0.1437	44.629	-0.003029	0.0017437	0.0823759
17	56993407	rs10853008	T	C	0.6812	7.406	1.299e-13	-+--++-+-+-+++++--+-+++-+-++++---++++-++-+---+++-+++-+++-+-+---+---+++--++++	0.03683	23.7107	300486	3.181	0.001467	0.2482	12.419	2.123	0.03373	0.02575	35.9631	7.621	2.513e-14	0.9001	0	0.9001	0	-0.005582	0.0017411	0.00134555
17	56735123	rs451962	A	G	0.3753	-7.406	1.299e-13	+++---+-+++++++++-----+-+--+--+++++++++-++-++-+-+--++-+-+++-++++-+-++++-++-+	0.2641	8.8567	300486	4.42	9.887e-06	0.5934	0	0.235	0.8139	0.1021	25.2653	4.7	2.606e-06	0.6038	0	0.6038	0	0.0050493	0.0017414	0.00373766
17	57071892	rs12948746	A	G	0.3674	-7.406	1.302e-13	???--???++++++?+--++++--++?+-+--++--?+-++++++++---?+++-+???+-????--+++--+--+	0.6127	0	274440	4.85	1.233e-06	0.5744	0	2.908	0.003637	0.622	0	4.589	4.452e-06	0.2937	19.2897	0.2937	19.2897	0.0057136	0.0017421	0.00103896
17	56727218	rs302845	A	G	0.6246	7.406	1.303e-13	---++-+-++++++++-+--++--++++++-+-++-++-++++-+-+++-+-+---+++++++++--+++--++++	0.6116	0	300486	4.741	2.132e-06	0.9229	0	-0.987	0.3234	0.5907	0	5.428	5.685e-08	0.1174	49.0143	0.1174	49.0143	-0.0052852	0.0017415	0.00240602
6	29175498	rs9257611	A	G	0.1114	7.405	1.307e-13	???+-???++++-?+-?+-??---+-?+---+++--?-+-+----++++-?--?--???++????+++--+?++++	0.005298	36.1246	273057	2.325	0.02005	0.06781	31.9929	-1.423	0.1547	0.06945	30.8322	5.955	2.595e-09	0.8807	0	0.8807	0	-0.0030285	0.0017437	0.0824138
20	47534729	rs34651656	A	G	0.3235	7.404	1.32e-13	??+-+--++++++?-+--+++-+-++?+-+--+++-?+-+++++-+----?++--+???+--+-?---++-++-++	0.6046	0	288078	4.04	5.338e-05	0.4578	0.510712	1.95	0.05118	0.5636	0	4.598	4.262e-06	0.4131	0	0.4131	0	0.008018	0.001746	4.38733e-06
20	47653498	rs6019604	A	G	0.3224	7.404	1.322e-13	-++--+++++-+--++-+-+-+-+-+--++-+++++++++---+++-+-++++--+++++--+++--+++++++++	0.4396	1.57739	300486	4.602	4.191e-06	0.2699	11.1486	-0.292	0.7706	0.821	0	4.463	8.084e-06	0.3783	2.84974	0.3783	2.84974	0.0083898	0.0017449	1.52335e-06
17	56663842	rs9907940	A	G	0.3758	-7.404	1.322e-13	----++--+---+--+++-++--+-+--------+-+--+---++------++-++++---+---+++-+-+----	0.1604	13.8871	300486	-2.852	0.004348	0.1144	21.5363	-2.051	0.04023	0.3105	9.85848	-4.225	2.393e-05	0.4852	0	0.4852	0	0.0053131	0.0017416	0.00228297
20	47692392	rs2426114	T	C	0.4077	-7.403	1.33e-13	+-+-+-++-+--+++-+---+-+-++-++++-++---+++--------+-?--+++++-+-+-++---+-++++-+	0.08006	19.2774	300049	3.195	0.001399	0.5488	0	-1.147	0.2514	0.2404	14.4397	7.006	2.448e-12	0.165	41.1187	0.165	41.1187	-0.0079763	0.0017409	4.61424e-06
17	56711123	rs631843	A	C	0.6241	7.403	1.332e-13	-+-+++--?--+----?-++??--++??--+---+-+--------+--+-?-------+??--+-++----?----	0.05044	23.3156	282221	-4.172	3.019e-05	0.03488	32.5196	-2.866	0.004154	0.6929	0	-3.388	0.0007028	0.02731	67.2274	0.02731	67.2274	-0.0052527	0.0017414	0.002558
6	98380233	rs9482117	A	G	0.4751	-7.403	1.335e-13	-+--+++---+++---+----+-+--??+-+----+----++-++-++----+++-+++--+++-+++--++----	0.322	6.44624	293571	-4.132	3.596e-05	0.3033	9.43324	-0.148	0.8821	0.3785	5.5594	-4.014	5.958e-05	0.7424	0	0.7424	0	-0.0046881	0.0017433	0.00716308
6	29211438	rs3129104	A	T	0.8922	-7.402	1.341e-13	---++-+-++--+-++----++--++++++-+-++--+-++++-+-+++-+-+---+++++++++--+++--++++	0.701	0	300486	4.858	1.184e-06	0.9477	0	-0.87	0.3845	0.615	0	5.237	1.628e-07	0.1385	45.4843	0.1385	45.4843	0.0034419	0.0017408	0.0480176
17	57048660	rs9898916	T	C	0.6259	7.402	1.342e-13	++-++-+++++++-+-+----+-+---++++--+++++++--+-+++---?-+--+------++++-++---++++	0.5795	0	300049	3.592	0.0003284	0.3005	9.49386	0.953	0.3406	0.6522	0	4.067	4.77e-05	0.8339	0	0.8339	0	-0.0053954	0.0017418	0.00195074
20	47755742	rs6066978	T	C	0.4068	-7.401	1.354e-13	+--++--+--++-++-?++-+-----++-+-++++-++-+++++-+++-+--0-+++--++++-+++-++--++++	0.005782	31.6593	300406	2.077	0.03777	0.2046	15.0851	1.851	0.06414	0.003348	46.1667	5.606	2.069e-08	0.2845	20.9278	0.2845	20.9278	-0.0079297	0.0017407	5.22998e-06
6	28144832	rs35781323	T	C	0.8974	-7.401	1.355e-13	-++??++-?+?++??+?-????????---??-+-+?--?--?????????++????-++--+---?????-?----	0.3992	4.02822	246054	-3.461	0.0005388	0.3091	9.59895	NA	NA	NA	NA	-5.32	1.035e-07	0.5663	0	0.5663	0	0.0037296	0.0017402	0.0320922
17	56675636	rs417005	T	C	0.6248	7.4	1.357e-13	+++++---++++--+--------+++-+++--+?++-+-+-++++-++--+++--+---+--++++--+++-++++	0.0414	23.219	281655	2.799	0.005119	0.06576	26.5232	0.574	0.5657	0.1567	20.494	5.863	4.536e-09	0.5144	0	0.5144	0	-0.0052664	0.0017415	0.00249402
6	29118747	rs3130725	T	G	0.8883	-7.4	1.359e-13	--++++++---+++-+--+---++-+--+-+++--+---++++++--+-+----+----++--++-++--+?----	0.263	8.95445	300310	-3.266	0.001092	0.2019	15.256	-1.288	0.1976	0.3036	10.4275	-5.607	2.053e-08	0.9387	0	0.9387	0	0.0029534	0.0017438	0.0903441
17	56684271	rs302853	C	G	0.6251	7.4	1.36e-13	-+-+--++----++-++-+++-+---+----+----+-+-+-----++++---++-+++--+-----+---+----	0.09676	17.873	300486	-3.146	0.001653	0.06913	25.8793	-0.951	0.3416	0.3563	6.95655	-5.941	2.829e-09	0.471	0	0.471	0	-0.0052127	0.0017415	0.00275994
20	47690591	rs3092411	T	G	0.4075	-7.4	1.365e-13	???+????++++-++-??-??---++?+?--++++-?++-+----+-++-??-?--???++????++-+-+?++++	0.005544	36.7121	270026	2.59	0.009599	0.3796	6.03606	-1.988	0.04684	0.0615	32.3696	7.319	2.497e-13	0.9476	0	0.9476	0	-0.0079756	0.0017409	4.62381e-06
20	47654258	rs3092302	T	C	0.5922	7.398	1.379e-13	+++++++-+-+++-++++--++---+++++---++-++--+++-+-+-+-++----+++++++++--+++--++++	0.1309	15.5947	300486	3.969	7.211e-05	0.812	0	-1.029	0.3033	0.04996	31.4709	6.051	1.439e-09	0.3808	2.31195	0.3808	2.31195	0.0078142	0.0017407	7.1499e-06
6	29189972	rs3130808	A	G	0.1114	7.398	1.379e-13	-++--++--+-++--+?--+--+++-+---+---++--------+-+---++-+---++--+---------+----	0.06256	20.8497	300406	-3.168	0.001535	0.2043	15.1013	-2.137	0.03256	0.04056	33.3946	-5.353	8.628e-08	0.5644	0	0.5644	0	-0.0030213	0.0017437	0.0831572
17	56626648	rs7223108	T	C	0.3748	-7.398	1.379e-13	?????+-?-?--??????+???+?+-??-++++-+-?-+--+-++-----?-+-+-?????????+----+?----	0.1332	19.2794	255863	-2.633	0.00846	0.1978	21.5469	-1.648	0.09933	0.1621	22.6006	-4.775	1.795e-06	0.2272	30.8437	0.2272	30.8437	0.0052849	0.0017415	0.0024088
6	26501768	rs2295593	T	C	0.1311	7.398	1.38e-13	++----++-+++----+-+-+-++-++---+-----+--+-+-+-+-++-----+-+---------++-+++--+-	0.5002	0	300486	-3.312	0.0009276	0.8812	0	-0.137	0.8907	0.3299	8.62295	-6.455	1.08e-10	0.1185	48.8317	0.1185	48.8317	-0.0035422	0.0017744	0.0459092
6	28139710	rs13217984	A	T	0.8974	-7.398	1.383e-13	???--???++++++?+--++++--++?+-+--+++-?+-++++++++---?+++-+???+-????---++--+--+	0.6087	0	274440	4.916	8.845e-07	0.437	1.75139	2.841	0.004495	0.7641	0	4.526	6.009e-06	0.2399	28.6903	0.2399	28.6903	0.0037265	0.0017402	0.0322404
20	47719949	rs6063354	T	C	0.592	7.398	1.384e-13	-+-++-----++----+--+++++-+-++-+--++-----+--+----+-----+--++-+--++-+------+--	0.5197	0	300486	-3.783	0.0001547	0.6009	0	-2.05	0.04038	0.3639	6.47796	-4.174	2.987e-05	0.2296	30.4428	0.2296	30.4428	0.0079015	0.0017409	5.65848e-06
6	29219489	rs3117333	A	G	0.1113	7.398	1.387e-13	-+-++---?+-+---++++++--+-------+---+----+++-+-++-++-+---++-+----+-++-+-+--+-	0.7057	0	291414	-4.433	9.313e-06	0.4979	0	-0.787	0.4312	0.6895	0	-4.959	7.093e-07	0.7687	0	0.7687	0	-0.0029535	0.0017432	0.0902194
20	47766929	rs8117492	T	C	0.4069	-7.397	1.388e-13	+++--+++++--++++-++---+-+--+++---++++++++++--++++-+++++----++++++-+-+--++--+	0.2764	8.31632	300486	4.241	2.223e-05	0.9432	0	0.534	0.5935	0.04782	31.7996	3.821	0.0001328	0.03331	65.5805	0.03331	65.5805	-0.0079305	0.0017407	5.21795e-06
20	47640466	rs3092720	C	G	0.408	-7.397	1.389e-13	---++-+-++--++++-+--++--++++++-+-++--+-++++-+-+++-+-+---+++++++++--++++-++++	0.6645	0	300486	4.84	1.298e-06	0.9186	0	-0.892	0.3722	0.6316	0	5.302	1.146e-07	0.1522	43.2141	0.1522	43.2141	-0.0079243	0.0017409	5.32108e-06
6	29148394	rs3116815	A	G	0.892	-7.395	1.409e-13	+++--+-+--++----++++--++------+-+--++-+----+-+---+-+-+++---------++----+----	0.7142	0	300486	-4.887	1.022e-06	0.9535	0	0.891	0.3728	0.6264	0	-5.236	1.641e-07	0.1394	45.3253	0.1394	45.3253	0.0035006	0.0017406	0.0443098
20	47690189	rs2426113	A	G	0.5924	7.395	1.411e-13	+++---++++---+-?+--+----++++++++-+--+++-+++--++----+++-+++++-+++++-++++-++++	0.5845	0	300127	4.56	5.103e-06	0.4999	0	0.744	0.457	0.5186	0	5.181	2.21e-07	0.6499	0	0.6499	0	0.0079729	0.0017409	4.66015e-06
20	47755075	rs6066977	A	G	0.4066	-7.395	1.412e-13	-+--+++---+-+---++-+-++--+------+--+-------++-+---+++-+--+-+-+---+---++-----	0.5429	0	300486	-3.133	0.001733	0.6644	0	-0.69	0.49	0.5283	0	-5.219	1.801e-07	0.08305	55.0494	0.08305	55.0494	-0.0079602	0.0017406	4.80397e-06
2	155685078	rs2591140	A	G	0.5257	7.395	1.419e-13	-++--+-++-+-+-+++-+-----+++?+-++-+++?+-++-+--++-+-+++++-++--+++-+---+-+-++++	0.07396	19.9087	294211	4.061	4.886e-05	0.323	8.30337	0.805	0.4209	0.09902	25.5749	5.473	4.427e-08	0.04966	61.6858	0.04966	61.6858	-0.0022677	0.0017502	0.195074
16	28550667	rs3785354	T	C	0.3601	-7.395	1.419e-13	---++++-+--+++++-+-+-+-----+++-++++++++-+++-+-+--++-++-+-++-+-++++-++-+-++-+	0.2238	10.6856	300486	1.884	0.0596	0.5426	0	0.813	0.416	0.2597	13.1467	6.615	3.721e-11	0.4147	0	0.4147	0	-0.0021228	0.001736	0.221417
20	47758549	rs10432729	T	C	0.4035	-7.394	1.42e-13	+-+---++?+--+++---+-+-+-+++++++-+++-+++-+----+--+-?--+-+--+--+-+----+-+-++-+	0.04535	22.846	290977	4.986	6.151e-07	0.2625	11.8207	-0.374	0.7082	0.1536	20.7398	8.128	4.364e-16	0.4442	0	0.4442	0	-0.0079181	0.0017424	5.51315e-06
20	47695391	rs2024959	A	G	0.4077	-7.394	1.424e-13	???--???+++++?-+--+++-+-++?+-+--+++-?++++++++++---?+++-+???+-????--+++--+-++	0.6864	0	275414	4.503	6.71e-06	0.5629	0	2.9	0.003729	0.7305	0	4.559	5.141e-06	0.2369	29.2119	0.2369	29.2119	-0.0079873	0.0017411	4.48539e-06
17	56705901	rs591200	A	G	0.3745	-7.394	1.43e-13	-+-??-?---+-+--+?-???++?--+---+++-+++--+-++?+-+--+?---+-+--+-+--+--+---?----	0.05427	23.0168	298071	-3.073	0.002119	0.2302	13.7775	1.121	0.2623	0.1716	22.1588	-5.985	2.162e-09	0.6395	0	0.6395	0	0.0052567	0.001741	0.00253396
17	56693132	rs302859	T	C	0.6249	7.393	1.436e-13	+-+--+++?-+-+++------++-+++++++-+++-++++---+-+--+--+-+++--+-++++-+--+-+-++-+	0.6793	0	291414	4.465	8.012e-06	0.4689	0.0538172	0.75	0.4533	0.6868	0	4.989	6.07e-07	0.7593	0	0.7593	0	-0.0050862	0.0017414	0.00349221
20	47753019	rs11696396	T	C	0.4069	-7.393	1.438e-13	-+-+?+++++++-++-?+-??--?++-++---++--+++++----+-++-+--?-+----++++-+--+++?++++	0.02784	26.1078	297876	3.35	0.0008076	0.3815	4.91133	-1.445	0.1483	0.1386	24.3122	7.701	1.345e-14	0.6761	0	0.6761	0	-0.0079321	0.0017407	5.19398e-06
6	108926496	rs2802295	A	G	0.3832	-7.393	1.44e-13	???----?+++++?-+--+++---++?+-+--+++-?++++++++++---++++-+???+-???+--+++--+-++	0.6803	0	277116	4.288	1.803e-05	0.5672	0	2.749	0.005977	0.6841	0	4.464	8.048e-06	0.2728	23.0177	0.2728	23.0177	0.011112	0.0017643	3.01509e-10
4	106220558	rs2466920	T	G	0.419	7.392	1.442e-13	???---??+++++?-+--+++-+-++?+-+--+++-?++++++++++---??++-+???+-????--+++--+-++	0.6544	0	274218	4.26	2.044e-05	0.4815	0	2.882	0.003947	0.7179	0	4.616	3.919e-06	0.27	23.5084	0.27	23.5084	0.0045204	0.0017421	0.00946455
20	47726129	rs6063355	T	C	0.5921	7.392	1.442e-13	+---+--+---+---++--++---++++++-+-++--+-++--+-+---+-+-++++--+++++-++++---++++	0.4914	0	300486	2.242	0.02494	0.623	0	-0.097	0.9229	0.6829	0	6.242	4.318e-10	0.2794	21.8546	0.2794	21.8546	0.0078687	0.0017408	6.17874e-06
3	23963183	rs9755750	A	G	0.279	-7.391	1.454e-13	???-+--?---++--?-?+-++++--??-++----+?+------++++--?--?+-++++????-++----?----	0.289	8.59232	273535	-2.32	0.02031	0.07522	29.6727	0.311	0.7556	0.8794	0	-5.485	4.139e-08	0.4873	0	0.4873	0	0.0050943	0.0017733	0.00406818
1	32072406	rs6664789	C	G	0.375	-7.391	1.46e-13	---+-+---++-------+++++---+--++---+---+--+++---++++---+-+----+--++--------+-	0.7312	0	300486	-4.8	1.586e-06	0.4925	0	0.47	0.638	0.9396	0	-4.097	4.182e-05	0.5723	0	0.5723	0	0.0022661	0.0017484	0.194935
20	47719810	rs6063353	A	G	0.4081	-7.391	1.461e-13	+--++--+--++-++-?++-+-----++-+-++++-++-+++++-+++-+--0-+++--++++-+++-++--++++	0.007172	30.8973	300406	2.123	0.03378	0.226	13.7522	1.812	0.06999	0.003613	45.8763	5.591	2.252e-08	0.285	20.8652	0.285	20.8652	-0.0078793	0.0017409	6.01174e-06
17	56827760	rs2643119	T	G	0.6242	7.39	1.464e-13	----+------+++--+-+++-----+-+++-------+--+-++-++++--+----+++-++--+-----+-+-+	0.06666	20.3441	300486	-5.806	6.394e-09	0.5728	0	0.033	0.9735	0.1701	19.4544	-4.392	1.122e-05	0.009125	74.0102	0.009125	74.0102	-0.0051673	0.0017418	0.00301093
6	29248149	rs3130834	T	C	0.892	-7.39	1.466e-13	++++++-++++++--+++--+++++-+++----++--+--+-+-+-+--++-+--++-++++-++---+++-++++	0.248	9.57319	300486	4.518	6.238e-06	0.5554	0	-0.478	0.6328	0.2113	16.4415	5.298	1.17e-07	0.4466	0	0.4466	0	0.0034842	0.0017407	0.0453315
17	56626500	rs7223073	A	G	0.372	-7.39	1.471e-13	-++++++-+--++++--+++--+-+--+++++++++-++-+0--+++--+++++-++++-++++++--+-+-++-+	0.9694	0	300486	2.398	0.01647	0.9714	0	0.725	0.4684	0.8393	0	5.414	6.18e-08	0.335	11.5566	0.335	11.5566	0.0053151	0.0017412	0.00226934
17	56460800	rs9788975	A	G	0.3941	-7.39	1.473e-13	+++-++++---+-+--+--+--+--+-++-----++---+--+++----++-+++++-+-+---+-++-+------	0.9043	0	300486	-2.451	0.01426	0.5224	0	-0.493	0.6222	0.9848	0	-5.177	2.252e-07	0.5959	0	0.5959	0	0.0057109	0.0017398	0.0010292
17	56703124	rs2611781	C	G	0.3742	-7.39	1.474e-13	----+------+++--+-+++-----+-+++-------+--+-++-++++--+----+++-++--+-----+-+-+	0.06896	20.132	300486	-5.815	6.046e-09	0.577	0	0.032	0.9741	0.1742	19.1396	-4.392	1.122e-05	0.009298	73.9176	0.009298	73.9176	0.0052113	0.0017411	0.00276121
20	47720386	rs6125551	C	G	0.408	-7.389	1.482e-13	---+--+++++-+++----+--++++--+--+------+-+---+---++?++--+++-------+-+---+----	0.1819	12.8191	300049	-2.687	0.00721	0.5124	0	-1.296	0.195	0.07285	28.4197	-5.309	1.101e-07	0.3557	7.49306	0.3557	7.49306	-0.0078888	0.0017409	5.85868e-06
6	29133642	rs4947263	T	C	0.1122	7.389	1.483e-13	--++---+-+-+++++--+-+--++-+++-+--++-++++++---+-+++-+-+----+---+++-+++--+++++	0.5491	0	300486	3.156	0.001597	0.6935	0	0.462	0.6444	0.4829	0	5.506	3.667e-08	0.1521	43.2248	0.1521	43.2248	-0.0029888	0.0017438	0.0865366
6	108888593	rs2253310	C	G	0.3833	-7.388	1.486e-13	???++++?-----?+-++---+-+--?-+-++---+?----------+++----+-???-+???-++---++-+--	0.7039	0	277116	-4.373	1.227e-05	0.6203	0	-2.809	0.004964	0.6603	0	-4.626	3.735e-06	0.2928	19.4415	0.2928	19.4415	0.011041	0.001764	3.87972e-10
3	52732429	rs13081155	A	G	0.5014	-7.388	1.489e-13	???--???++++++?+--++++--++?+-+--+++-?+-++++++++---?+++-+???+-????--+++--+--+	0.5806	0	274440	4.898	9.682e-07	0.4686	0	2.891	0.003843	0.6947	0	4.545	5.5e-06	0.2538	26.3261	0.2538	26.3261	0.00015974	0.0017423	0.926947
20	47532536	rs6095360	A	G	0.6764	-7.388	1.491e-13	--+-----+--+----+----+++--+-+-+++--+-+---+++---++++--+++--+-+--+---+-+++----	0.5638	0	300486	-2.612	0.009004	0.8672	0	0.272	0.7856	0.2671	12.6612	-5.997	2.012e-09	0.9295	0	0.9295	0	-0.0079802	0.0017468	4.917e-06
6	28073881	rs34662244	A	G	0.1052	7.388	1.492e-13	++-++++++++-+++--++-+---++-+-+---++-+-++++--+++----++---++-+-++++++-++--++++	0.55	0	300486	2.842	0.004483	0.9137	0	-0.177	0.8596	0.2429	14.2686	6.37	1.891e-10	0.6344	0	0.6344	0	-0.0036156	0.0017404	0.0377572
6	28134221	rs35098436	T	C	0.8974	-7.388	1.496e-13	--+------------++----++++----+-+---+-++---++---++++--+++--+-+-+----+++++----	0.1862	12.5252	300486	-2.685	0.007259	0.8845	0	0.189	0.8502	0.04655	31.9975	-6.464	1.021e-10	0.3045	17.3098	0.3045	17.3098	0.0037278	0.0017402	0.032181
17	56459063	rs8070135	A	G	0.3431	-7.387	1.501e-13	+-+--+-++++++-+--++------+-+-+-+++--+-++-++--+++++-+--+++---+++++-+-+-+-++-+	0.9595	0	300486	2.809	0.004967	0.7998	0	0.877	0.3806	0.9398	0	4.837	1.318e-06	0.4901	0	0.4901	0	0.0058471	0.0017391	0.000773571
6	28129232	rs13197176	T	C	0.1011	7.387	1.504e-13	???-????-+--+--+?-+??++?--?--+++--++?----++++-+--+?++?+--+++-????----+-?----	0.008526	33.8187	278163	-2.294	0.02179	0.7913	0	1.574	0.1156	0.0198	41.0377	-8.047	8.468e-16	0.8252	0	0.8252	0	-0.0037032	0.0017401	0.0333273
20	47725607	rs11696870	A	G	0.5921	7.386	1.511e-13	---+++-+----++-+--+--++++-----+-------+---+--------+-+-+----+---++--+-+-----	0.7711	0	300486	-5.236	1.643e-07	0.8439	0	-1.063	0.2879	0.3962	4.44034	-5.289	1.228e-07	0.7396	0	0.7396	0	0.0078777	0.0017408	6.02976e-06
6	27332891	rs28360634	T	C	0.8989	-7.386	1.512e-13	+-+-+++-+++--+++++-+-+--++++--++-+++++-++++--++---?--++---++-++++++-+-++++-+	0.78	0	300049	4.543	5.552e-06	0.7997	0	0.603	0.5468	0.469	0	5.046	4.503e-07	0.8372	0	0.8372	0	0.0039748	0.0017509	0.0232006
6	28133239	rs34505829	A	T	0.8974	-7.386	1.518e-13	-++--++--+-++--+?--+--+++-----+-+-++--------+-+---++-----++--+---------+----	0.08643	18.7617	300406	-3.023	0.002504	0.2096	14.7703	-2.082	0.03735	0.06737	29.4558	-5.354	8.586e-08	0.5617	0	0.5617	0	0.0037336	0.0017402	0.031908
4	106192775	rs2647230	A	G	0.5844	-7.385	1.52e-13	+--+++----++++----+++-++------+---+++----+-------+-++++--+---+-+--+----+----	0.7632	0	300486	-5.495	3.903e-08	0.6054	0	0.054	0.9573	0.8639	0	-4.647	3.372e-06	0.8572	0	0.8572	0	-0.0046315	0.001745	0.0079506
20	47647068	rs3091529	A	G	0.5923	7.385	1.523e-13	-+-++---?+-+---++++++--+-------+---+-----++-+-++-++-+---++-+----+-++-+-+--+-	0.7364	0	291414	-4.443	8.859e-06	0.5362	0	-0.773	0.4397	0.6919	0	-4.99	6.027e-07	0.8173	0	0.8173	0	0.0078595	0.0017406	6.32557e-06
1	32076261	rs1464306	T	C	0.3753	-7.385	1.526e-13	-++-++-++-++-++++-++----+++?++++-++--+-++---++----+++++++++--+++?-+-++-+++++	0.06193	21.0281	295410	4.778	1.772e-06	0.2262	14.0252	0.609	0.5427	0.114	24.1371	5.372	7.801e-08	0.1059	50.9804	0.1059	50.9804	0.002257	0.0017487	0.196798
17	56782297	rs2567905	T	C	0.3749	-7.384	1.532e-13	-+-+?++++--+-++-?+-?+---++?++--+++--+-+++++--+--+--+-?-----+-+++---+--+?++++	0.2019	12.1646	295560	3.269	0.001078	0.3997	3.94089	-0.793	0.4275	0.3649	6.78946	6.682	2.353e-11	0.845	0	0.845	0	0.0051224	0.0017417	0.0032719
20	47714370	rs71351958	T	C	0.5929	7.384	1.532e-13	-+++-+-++-++++----+-+--+--++++++++-+-+--++++----+----+++++-++---+++++++-++-+	0.3029	7.17937	300486	1.938	0.05261	0.664	0	1.313	0.1893	0.1769	18.9343	5.579	2.419e-08	0.2506	26.8828	0.2506	26.8828	0.0078743	0.001741	6.10239e-06
20	47763558	rs6066982	A	C	0.4068	-7.384	1.535e-13	+--++--+-----+---+----+------+-----+++----++---++-?+--+----++-+--+-+--++----	0.03992	23.4129	300049	-2.485	0.01295	0.01362	36.0823	-1.299	0.194	0.3437	7.74908	-5.495	3.908e-08	0.8759	0	0.8759	0	-0.0079801	0.0017406	4.54988e-06
6	98378173	rs4395728	T	C	0.5246	7.384	1.536e-13	--++-+-+++-++-+-+----++-+-++-----+--?+-+++--++----++--++--+-++++----++--++++	0.74	0	298560	2.884	0.003926	0.694	0	-0.995	0.3198	0.9499	0	6.429	1.283e-10	0.6687	0	0.6687	0	0.0046991	0.0017434	0.00703234
17	56756977	rs302865	A	G	0.3952	-7.384	1.538e-13	???-+???++++++??-?++++--++?+-+--++--?++++++-+++---?+++-+?????????--+++--+-++	0.5655	0	271174	4.378	1.196e-05	0.3612	7.619	2.823	0.004761	0.7325	0	4.303	1.685e-05	0.2519	26.6504	0.2519	26.6504	0.0051686	0.0017409	0.00298951
6	28130089	rs13201308	T	C	0.1026	7.384	1.539e-13	??--+-+----+-++-----+++-+-?-----+---+-+----++-++-+----+--+-+---+-+++-+------	0.3492	5.33665	296527	-3.173	0.001506	0.542	0	-0.113	0.9101	0.5165	0	-6.883	5.868e-12	0.2301	30.3459	0.2301	30.3459	-0.003727	0.0017402	0.0322181
6	29111775	rs3129120	T	C	0.8885	-7.383	1.55e-13	-----++-----++-+-----+--+-----+-+-+++-++-++-+--++++-++------+---++++---+----	0.05428	21.5793	300486	-4.037	5.417e-05	0.5001	0	0.522	0.6017	0.01844	37.9075	-5.756	8.617e-09	0.7294	0	0.7294	0	0.0029203	0.0017438	0.093994
17	56683612	rs302854	A	G	0.6252	7.383	1.552e-13	???++???------??+?----++--?-+-++--++?-+----+---+++?---+-?????????+++--++-+--	0.5909	0	271174	-4.428	9.496e-06	0.3986	4.68546	-2.736	0.00622	0.7235	0	-4.303	1.682e-05	0.2692	23.6447	0.2692	23.6447	-0.0051933	0.0017415	0.0028622
17	56480074	rs2301867	A	T	0.39	-7.383	1.553e-13	???++++?-----?+-++---+++--?-+-++---+?----------+++----+-???-+???-++---++-+--	0.678	0	277116	-4.433	9.289e-06	0.5338	0	-2.745	0.006044	0.7065	0	-4.587	4.49e-06	0.2828	21.2392	0.2828	21.2392	0.0056278	0.0017405	0.00122293
20	47760000	rs2869715	T	C	0.5924	7.382	1.554e-13	--++-++-+-++-++-+---++------------++--+---+++-++++-+-----++---+-++++--++----	0.2036	11.6587	300486	-3.657	0.0002548	0.5778	0	-0.745	0.4564	0.05134	31.2636	-5.654	1.571e-08	0.6515	0	0.6515	0	0.0079259	0.0017411	5.3064e-06
6	29206251	rs3117342	T	C	0.8887	-7.382	1.554e-13	-+-++-+-+++++++--+-+++-+++-++-+-+---++-+++--+++---+-+---++++-+++++++--+-++++	0.4771	0.047977	300486	2.259	0.0239	0.9176	0	-0.017	0.9865	0.3189	9.31899	6.985	2.856e-12	0.4106	0	0.4106	0	0.0029646	0.0017432	0.089002
20	47718594	rs6063352	T	C	0.5919	7.382	1.554e-13	--------+--++-----++----++------+-+---+-+-+++--++--++-+++++++-++-++--+------	0.6286	0	300486	-2.959	0.003084	0.4733	0	-1.044	0.2964	0.6171	0	-5.225	1.74e-07	0.587	0	0.587	0	0.007872	0.0017409	6.13479e-06
1	32068677	rs7523616	T	C	0.3748	-7.382	1.554e-13	-+-+++----+-++--+-+++-+-+--+--+-+-------+++++-+-+-----++----+++--++---+-----	0.6838	0	300486	-4.213	2.517e-05	0.5379	0	0.183	0.8548	0.7025	0	-4.252	2.119e-05	0.892	0	0.892	0	0.0022737	0.0017486	0.193495
17	56483194	rs58647683	T	C	0.6106	7.381	1.567e-13	+--+++-------+-+----+--+------+----+--+-+0+-------++-+++----++--++++--+-----	0.7446	0	300486	-3.1	0.001937	0.7154	0	-0.413	0.6799	0.5206	0	-5.408	6.374e-08	0.9633	0	0.9633	0	-0.0056725	0.0017407	0.00111918
20	47721759	rs67654540	T	C	0.592	7.381	1.568e-13	---+-+--+++----+++-----++-----++---+?+--+++++-+--+----+-+-+-++---+++-+------	0.1216	16.2725	298560	-2.848	0.004394	0.5826	0	0.899	0.3685	0.1263	23.0296	-5.791	6.997e-09	0.2976	18.5668	0.2976	18.5668	0.0078406	0.0017409	6.67575e-06
17	56717956	rs2611782	T	C	0.3746	-7.381	1.569e-13	++++-++++++---++-+---+++++-+---+++++++-++-+--+----++-++++---+--++-+++++-+-+-	0.07023	20.0171	300486	5.814	6.087e-09	0.5771	0	-0.026	0.9789	0.1781	18.8487	4.391	1.13e-05	0.009192	73.9741	0.009192	73.9741	0.0052529	0.0017414	0.002558
17	56522533	rs2531726	A	G	0.3665	-7.38	1.584e-13	++--+--+-+--+--+-++---++++++++++++--++-+++---+----+-+++++--+++-+----++--++++	0.1814	12.7714	300486	3.758	0.0001713	0.5466	0	0.738	0.4606	0.04628	32.0406	5.773	7.794e-09	0.7038	0	0.7038	0	0.0049145	0.0017415	0.004772
20	47724325	rs6125552	C	G	0.5919	7.38	1.587e-13	-+++-++++++-+++--+-+-+--++-+++-++++-++--+-++---++--+-?++-+--+++++--+++-?++-+	0.4514	1.10009	298407	3.993	6.519e-05	0.5928	0	-1.027	0.3045	0.5731	0	5.133	2.85e-07	0.4582	0	0.4582	0	0.0078274	0.0017409	6.91831e-06
17	56819216	rs8075786	T	C	0.3758	-7.38	1.589e-13	++-+--++-+++-+-++-+----+--++-+-++++++++++----+-+-++++++++-++-+-+-++-++--+-++	0.7203	0	300486	2.835	0.004584	0.5249	0	0.825	0.4092	0.8362	0	4.835	1.332e-06	0.1826	38.2335	0.1826	38.2335	0.0051535	0.0017418	0.00308958
20	47713063	rs17632	T	C	0.4081	-7.379	1.593e-13	???--???+++++?-+--++++--++?+-+--+++-?++++++-+++---?+++-+???+-????--+++--+--+	0.674	0	275414	4.592	4.398e-06	0.5419	0	2.793	0.005229	0.7241	0	4.624	3.769e-06	0.2371	29.1785	0.2371	29.1785	-0.0078974	0.001741	5.7306e-06
3	52815905	rs2710323	T	C	0.5243	-7.379	1.598e-13	-++---++++--+-++++---+--++++++-+++---++++-+++++++-+----++-+++-+-++-++++-++-+	0.7468	0	300486	5.428	5.705e-08	0.5764	0	-0.054	0.957	0.8634	0	4.654	3.255e-06	0.8249	0	0.8249	0	-0.0006042	0.0017458	0.729273
16	28554108	rs1074631	A	G	0.3566	-7.378	1.61e-13	+--+--+----+-+---+-++++------+------+-+--0-++--+-+---------+---+-+++--------	0.2148	11.1164	300486	-4.743	2.109e-06	0.3519	6.54206	-0.773	0.4397	0.3994	4.24208	-7.313	2.614e-13	0.09791	52.381	0.09791	52.381	-0.0020598	0.0017361	0.235451
6	26999845	rs13217285	T	C	0.1236	7.378	1.611e-13	???--???++++++++--++++--++?+-+--+++-?+-++++++++---?+++-+???+-????---++--+-++	0.659	0	276693	4.862	1.162e-06	0.5272	0	2.807	0.005	0.7388	0	4.568	4.924e-06	0.2466	27.5712	0.2466	27.5712	-0.0030897	0.0017404	0.0758578
6	98448405	rs12194546	A	C	0.4408	-7.376	1.625e-13	???--???++++++-+--++++--++?+-+--+++-?+-++++++++---?+++-+???+-????--+++--+--+	0.5757	0	276693	4.912	9.024e-07	0.3988	4.49282	2.884	0.00392	0.7479	0	4.595	4.324e-06	0.2405	28.5884	0.2405	28.5884	-0.0050251	0.001745	0.00398016
1	32091779	rs6663012	T	G	0.3856	-7.376	1.626e-13	-+-++++++++++++--++++--+-++++++-+++-+--+++--+++----++---++++-+-++++-----++++	0.1396	15.0748	300486	2.422	0.01542	0.6816	0	0.009	0.993	0.04097	32.9174	5.806	6.413e-09	0.5282	0	0.5282	0	0.0018632	0.0017607	0.289968
17	56828226	rs2088120	T	G	0.3752	-7.376	1.637e-13	???+++??-----?+-++---+-+--?-+-++---+?-+--------+++?---+-???-+????++---++-+--	0.6971	0	275772	-4.373	1.225e-05	0.5302	0	-2.927	0.003428	0.7461	0	-4.615	3.935e-06	0.2705	23.4108	0.2705	23.4108	0.0051724	0.0017418	0.00298195
20	47718431	rs911411	C	G	0.5915	7.375	1.64e-13	--+-+-++++-+++++-++++-+++++-+-+++-++++-++-++--+--+++-+--++-++--+++---++-++++	0.3494	5.24441	300486	2.842	0.004479	0.7258	0	-1.171	0.2415	0.4017	4.09514	5.591	2.263e-08	0.3186	14.7	0.3186	14.7	0.00791	0.0017409	5.53223e-06
16	28944700	rs35979293	T	G	0.3508	7.375	1.642e-13	---++++-+--+++++-+-+-+-----+++-++++++++-+++-+-+--++-++-+-++-+-++++-++-+-++-+	0.2448	9.71905	300486	1.92	0.05489	0.545	0	0.825	0.4096	0.2893	11.2163	6.625	3.48e-11	0.4112	0	0.4112	0	-0.0028809	0.0017356	0.0969393
1	32096746	rs10914458	T	C	0.3854	-7.375	1.643e-13	+--+--+----+++---+-+++++---?-+--+---?-+----++--+-+--------++-----++++-------	0.0918	18.4503	294211	-4.952	7.331e-07	0.4192	2.86795	-0.737	0.4608	0.1442	21.503	-6.446	1.151e-10	0.02562	67.7246	0.02562	67.7246	0.001785	0.001759	0.310199
20	47720957	rs755587	T	C	0.592	7.374	1.653e-13	+-++---+---+++--?-+???----+--+--+--++------++-+-----++----+-++--++-++-+---+-	0.07202	20.3125	300116	-2.825	0.004722	0.07106	25.6644	-1.648	0.09935	0.1343	23.5968	-4.636	3.555e-06	0.8506	0	0.8506	0	0.0078412	0.0017409	6.665e-06
20	47534590	rs13037557	T	C	0.3237	7.374	1.659e-13	???-????-+--+--+?-+??++?--?--+++--++?----0+++-+--+?++?+--+++-????----+-?----	0.01444	31.5716	278163	-2.444	0.01454	0.8045	0	1.499	0.1338	0.02655	39.2033	-7.934	2.123e-15	0.7504	0	0.7504	0	0.007973	0.0017476	5.06407e-06
20	47727341	rs6066968	A	G	0.5921	7.374	1.66e-13	-+-++-----++----+--+++++-+-++-+--++-----+--+----++----+---+-+--++-++-----+--	0.5991	0	300486	-3.78	0.0001567	0.6636	0	-2.024	0.04296	0.4167	3.14145	-4.182	2.89e-05	0.219	32.2187	0.219	32.2187	0.0078924	0.0017409	5.80096e-06
20	47769157	rs6125571	A	G	0.4071	-7.374	1.66e-13	-+--+-+--------+++++-?---+-+-+++----+------+++--+++-+--+--+----+++++--+-----	0.04362	22.9351	300394	-5.19	2.105e-07	0.005878	39.4508	-1.035	0.3008	0.7056	0	-3.417	0.0006334	0.7444	0	0.7444	0	-0.0079107	0.0017406	5.49667e-06
20	47648854	rs1022687	T	C	0.5924	7.373	1.663e-13	+-+---++?+--++++--+-+-+-+++++++-+++-+++-+----+--+-?--+-+-----+++----+-+-++++	0.03685	23.9663	290977	5.34	9.288e-08	0.3694	5.67677	-0.639	0.5225	0.1088	24.6193	8.487	2.122e-17	0.5059	0	0.5059	0	0.0079043	0.0017406	5.59887e-06
6	28130450	rs34765154	A	G	0.1026	7.373	1.666e-13	-++---+--+--+-+++----+--++++++-+-+---++++++++++++-+----++-+++-+-++--++--++-+	0.7574	0	300486	5.041	4.631e-07	0.4113	3.27651	0.202	0.8401	0.9188	0	4.461	8.145e-06	0.9205	0	0.9205	0	-0.003727	0.0017402	0.0322181
20	47648353	rs3091866	A	G	0.408	-7.372	1.677e-13	------+------++---++-----+---++++--++-++-+-+-+--+--+-++--+----+--+++---+----	0.2424	9.82867	300486	-4.603	4.168e-06	0.5655	0	0.442	0.6587	0.1955	17.562	-5.317	1.053e-07	0.4442	0	0.4442	0	-0.0078989	0.0017408	5.69639e-06
3	23962646	rs2001209	A	G	0.7207	7.372	1.678e-13	???--???+++++?-+--+++-+-++?+-+--+++-?++++++++++---?+++-+???+-????--+++--+-++	0.6926	0	275414	4.427	9.545e-06	0.5559	0	2.874	0.004049	0.7139	0	4.633	3.607e-06	0.2759	22.4606	0.2759	22.4606	-0.0051909	0.0017732	0.00341822
6	108894438	rs2764265	T	C	0.6084	7.372	1.679e-13	++-+++--++-+++++++--++-++-+++-++++++-++-+-++-+-+-++--+--+++--+-+--+-+++-++-+	0.1471	14.633	300486	4.929	8.284e-07	0.0382	30.054	-0.376	0.7067	0.8243	0	5.14	2.747e-07	0.6709	0	0.6709	0	-0.011082	0.0017695	3.79053e-10
20	47531817	rs7266065	A	G	0.3234	7.371	1.693e-13	----+++++--+-----++---++-+----+++--+--++++--+----+-+--+-+--+----+-++--+?----	0.3012	7.29489	300310	-2.759	0.005792	0.4032	3.72118	-0.043	0.9657	0.3558	7.06915	-5.384	7.271e-08	0.4255	0	0.4255	0	0.0078977	0.001745	6.01728e-06
17	56459408	rs1990008	C	G	0.6078	7.371	1.694e-13	+-+--+---+++-++-++-++-+++--+++--+++++-+--+++++-+---+++++---+--++-+--+++-+-++	0.5531	0	300486	3.622	0.0002929	0.5523	0	2.136	0.03266	0.6953	0	5.527	3.249e-08	0.03597	64.8959	0.03597	64.8959	-0.0057612	0.0017402	0.000930894
17	56598439	rs1057068	T	C	0.619	7.37	1.705e-13	-+++++-++++-+-+++-+----++++++-++++++-+-++0+--++-+-+++++++++-+++-+---++++++++	0.1639	13.6989	300486	4.898	9.687e-07	0.3135	8.67371	0.689	0.4907	0.3765	5.68707	7.389	1.48e-13	0.07196	57.1306	0.07196	57.1306	-0.0053812	0.0017416	0.00200263
17	56473259	rs9889419	T	C	0.6099	7.37	1.705e-13	--+--+-+?++++++-?+-?+?+-+++++-+-++++++-+-+-----++-+-++++-+++++++-+--++--++-+	0.2207	11.0911	291147	4.629	3.673e-06	0.4785	0	0.918	0.3586	0.1785	19.607	3.303	0.0009554	0.249	27.1491	0.249	27.1491	-0.0055628	0.0017404	0.00139252
20	47635715	rs730543	A	G	0.5915	7.369	1.713e-13	------+--------+-+--+++--+++--+-+------+-0--+-+-+--+--++--+++-+-++-+---+-+--	0.1212	16.2021	300486	-4.394	1.115e-05	0.03288	30.9893	-0.866	0.3866	0.6334	0	-3.742	0.0001829	0.4187	0	0.4187	0	0.0078668	0.0017409	6.21871e-06
17	56813782	rs304261	A	G	0.3762	-7.369	1.714e-13	-+++-+---++--------++--------++-+-+-?------+--+-++--+-+-+++--++--+-++----+--	0.07102	20.0579	298560	-4.018	5.867e-05	0.1057	22.5053	-1.83	0.06718	0.1135	24.1792	-4.901	9.535e-07	0.4491	0	0.4491	0	0.0053143	0.0017418	0.00228087
20	47762700	rs13044900	A	G	0.403	-7.369	1.722e-13	???--???++++++-+--++++--++?+-+--+++-?+-++++++++---?+++-+???+-????--+++--+--+	0.5671	0	276693	4.899	9.622e-07	0.3926	4.9279	2.84	0.004518	0.7403	0	4.559	5.134e-06	0.2431	28.1609	0.2431	28.1609	-0.0079405	0.0017437	5.2723e-06
17	56905505	rs12941189	A	G	0.3772	-7.369	1.724e-13	???--???++++++++--++++--++?+-+--+++-?+-++++++++---?+++-+???+-????---++--+-++	0.629	0	276693	4.865	1.146e-06	0.4629	0	2.839	0.004532	0.7447	0	4.598	4.275e-06	0.2611	25.0562	0.2611	25.0562	0.0053752	0.0017418	0.00202862
6	29211442	rs3117339	T	C	0.1067	7.368	1.726e-13	+--++-+-+-+++-++++--++--++++++-+-++-++-++++-+-+++-+-+---+++++++++--+++--++++	0.6581	0	300486	4.448	8.649e-06	0.9573	0	-0.784	0.4331	0.4778	0	5.539	3.043e-08	0.1257	47.6166	0.1257	47.6166	-0.003352	0.0017406	0.0541377
20	47663944	rs3092374	C	G	0.5934	7.368	1.732e-13	+-++---+-+-+++++++++-++++++++-++++-+-+---+++++++++?-++-++--++--++--+++++++++	0.9367	0	300049	4.016	5.918e-05	0.8976	0	2.883	0.003934	0.8013	0	4.484	7.331e-06	0.3059	17.0583	0.3059	17.0583	0.0078176	0.0017407	7.08598e-06
17	56843048	rs9915935	A	G	0.3758	-7.368	1.736e-13	+++++++++--+--+-+-+--+++--++++++++++---++-+-+--+---++++--+----+++---+-++++++	0.07532	19.5702	300486	1.673	0.09429	0.5526	0	0.168	0.8662	0.04395	32.4157	5.899	3.652e-09	0.416	0	0.416	0	0.0052062	0.0017421	0.0028035
20	47639464	rs2426106	C	G	0.592	7.367	1.751e-13	???----?+++++?-+--+++---++?+-+--+++-?++++++++++---++++-+???+-???+--+++--+-++	0.643	0	277116	4.455	8.388e-06	0.5079	0	2.777	0.005484	0.7	0	4.521	6.153e-06	0.2567	25.816	0.2567	25.816	0.0078614	0.0017408	6.30812e-06
1	32107622	rs6699558	T	C	0.3858	-7.365	1.765e-13	+++--++++--+++++++-++----+-++-----+-++-+++-+-+---++-+++++-++-+++----+-+-++++	0.1139	16.6778	300486	3.064	0.002183	0.01487	35.3295	0.229	0.8191	0.7647	0	5.199	2e-07	0.8135	0	0.8135	0	0.0017841	0.0017584	0.310292
6	27309779	rs71537559	C	G	0.1015	7.365	1.765e-13	--++++++++++-+---+++-+-+-+++-+-++-++-+++++----------+---+-+++---+----+++++++	0.4244	2.19347	300486	2.534	0.01127	0.3028	9.27442	0.656	0.5116	0.5937	0	5.353	8.652e-08	0.5566	0	0.5566	0	-0.0037977	0.0017532	0.030297
20	47771274	rs35716445	A	G	0.407	-7.365	1.775e-13	???++???++?+-?+-?+-?----+-?+-----+--?++-+--+-+-++-?--?-0???-+????++-+-+?++++	0.01232	32.7215	272263	2.256	0.02404	0.334	9.15913	-1.548	0.1215	0.06981	30.7844	7.074	1.505e-12	0.9912	0	0.9912	0	-0.0079388	0.0017405	5.08745e-06
17	57064167	rs6503890	A	G	0.3689	-7.364	1.783e-13	-+++-+++?+++-+++--+++-++++++++---+++-+-+-++----+---++?++++--+--++++-+--?++-+	0.004292	33.0002	289335	4.45	8.594e-06	0.00959	37.7166	1.787	0.07394	0.07863	28.4692	3.551	0.0003839	0.2881	20.2976	0.2881	20.2976	0.005352	0.0017421	0.0021252
17	56517962	rs2531725	A	G	0.6326	7.363	1.794e-13	+++++-++++---++++---+-+-++++++-+-+---+-+++---++---+-0-+++-++--++----+--++-++	0.004299	32.4963	300486	4.126	3.695e-05	0.135	19.8878	-0.025	0.9798	0.01187	40.22	5.779	7.516e-09	0.09159	53.5028	0.09159	53.5028	-0.0049037	0.0017415	0.00486631
17	56993901	rs9896313	T	C	0.3816	-7.361	1.827e-13	-+-??-?+--+----??-+???+?--?-+-+---??----+-++++++--?----+-+-?+++-+??+---?----	0.2049	12.9273	293433	-4.675	2.941e-06	0.1546	19.6749	0.416	0.6771	0.636	0	-3.738	0.0001853	0.6185	0	0.6185	0	0.0055833	0.0017419	0.00134927
20	47766197	rs7272164	T	C	0.5931	7.36	1.837e-13	-+----++++++-+++++++-++++++++--+-++-++-+-+-+++++++--+---++++---+----++-+++++	0.7768	0	300486	3.509	0.0004506	0.7645	0	0.504	0.6141	0.447	1.2053	4.607	4.092e-06	0.9601	0	0.9601	0	0.0079797	0.0017406	4.55512e-06
20	47753265	rs11696888	T	C	0.4058	-7.36	1.839e-13	--++?+?+++++-++-?+-??--?++-++---++---++++----+-++-+--?-++---++++++--+-+?++++	0.01298	29.7436	297696	3.304	0.0009545	0.2406	13.0027	-1.434	0.1515	0.1282	25.2834	7.732	1.056e-14	0.6688	0	0.6688	0	-0.0078996	0.0017407	5.67937e-06
17	57017420	rs12936058	T	C	0.3742	-7.36	1.839e-13	???++???--------++----++--?-+-++---+?-+--------+++?---+-???-+????+++--++-+--	0.6475	0	276693	-4.855	1.204e-06	0.4871	0	-2.841	0.004502	0.7469	0	-4.604	4.139e-06	0.2632	24.6988	0.2632	24.6988	0.0055461	0.0017418	0.00145211
20	47660285	rs73266241	A	T	0.4076	-7.36	1.842e-13	---+-++----+-++-+-+--+----?++--+-------+-+++---++++--+---------+---++-------	0.7458	0	297920	-3.888	0.0001013	0.7924	0	-0.441	0.6592	0.4026	4.03685	-4.313	1.614e-05	0.8188	0	0.8188	0	-0.0078373	0.0017407	6.71893e-06
1	32074747	rs10798877	A	G	0.625	7.359	1.847e-13	+-++--+---+-----++-+---+-+----+++----+--+-+++---+---+---+-+-+++-+++---++----	0.03478	24.006	300486	-3.144	0.001664	0.2473	12.4726	-2.2	0.02777	0.02497	36.1498	-7.69	1.477e-14	0.9172	0	0.9172	0	-0.0023235	0.0017486	0.18392
2	155730702	rs2652429	A	T	0.5239	7.359	1.852e-13	-+-++---?+-+---++++++--+-------+---+-----++-+-++-++-+---+--+----+-++-+-+----	0.7197	0	291414	-4.583	4.583e-06	0.5215	0	-0.809	0.4184	0.6778	0	-5.048	4.468e-07	0.8464	0	0.8464	0	-0.0025616	0.0017476	0.142712
20	47667056	rs7265500	T	C	0.4077	-7.359	1.853e-13	-+-+++-+-+++----+-+-+++--+++---+-------+--+++-++++----+-------+-+-++-++---+-	0.3235	6.31558	300486	-2.041	0.04127	0.4561	0.793651	-0.138	0.8901	0.4792	0	-5.923	3.166e-09	0.3815	2.15264	0.3815	2.15264	-0.0078215	0.0017408	7.0194e-06
20	47677835	rs6012593	A	G	0.3161	7.359	1.858e-13	-++++-++++++-++------++++-++++--+++-++-+++-++------+-+----++-++++++-++++++++	0.1574	14.0529	300486	5.789	7.067e-09	0.3964	4.09744	-0.334	0.7386	0.3704	6.06801	3.541	0.0003983	0.325	13.4699	0.325	13.4699	0.0081063	0.0017458	3.43084e-06
1	32072737	rs6680160	A	G	0.3756	-7.359	1.859e-13	--+??-?++-+--+++?++???---+-+++---++-++++++++-+-+++---++++--+--+-+++-+---++++	0.228	10.9376	299694	1.844	0.06526	0.6071	0	0.401	0.6886	0.1847	20.008	6.103	1.04e-09	0.3915	0.0333222	0.3915	0.0333222	0.0022784	0.0017488	0.192628
20	47646321	rs6063348	C	G	0.4084	-7.358	1.868e-13	---------+---+-+-+--+++--+--------+-+-+--+----+-+-+-----+-++---+-+++++++----	0.08421	18.8329	300486	-1.9	0.05743	0.7361	0	0.193	0.8471	0.05857	30.2358	-6.554	5.612e-11	0.2103	33.6577	0.2103	33.6577	-0.0078604	0.0017408	6.31975e-06
17	56470511	rs4793585	A	G	0.3895	-7.357	1.876e-13	-+----+-++--+--+----++-++--+-+----+++-+----+--+---?-+-++---+--++++-++--+----	0.1536	14.3489	300049	-1.71	0.08718	0.2204	14.2386	-2.266	0.02346	0.3089	9.95858	-5.989	2.115e-09	0.6462	0	0.6462	0	0.0057225	0.0017405	0.00100972
20	47532750	rs6512554	A	G	0.676	-7.357	1.877e-13	+---+------+---++---+-++-++---+----+--++-+--+++--++-+?--+-++-----++----?--+-	0.4366	1.70733	298407	-3.826	0.0001304	0.5365	0	0.982	0.326	0.5908	0	-5.049	4.452e-07	0.454	0	0.454	0	-0.0079843	0.0017486	4.96935e-06
3	49834767	rs71324996	A	C	0.6902	7.355	1.912e-13	+-+-----++-+--++++-+-----++-++++-++-++-+-+---+---++--++--+--+++-++++-+++++++	0.1227	16.1064	300486	1.192	0.2333	0.2909	9.94642	0.743	0.4573	0.2758	12.0905	6.398	1.576e-10	0.9016	0	0.9016	0	0.0070627	0.001732	4.54674e-05
6	26978700	rs13215879	T	C	0.8764	-7.354	1.924e-13	???++???------+-++----++--?-+-++---+?-+--------+++?---+-???-+????++---++-++-	0.6117	0	276693	-4.811	1.503e-06	0.4845	0	-2.78	0.005436	0.698	0	-4.615	3.929e-06	0.2507	26.8649	0.2507	26.8649	0.0031006	0.0017404	0.0748342
6	29254982	rs9257681	C	G	0.8892	-7.354	1.925e-13	++--?----+--+--+?-+?++++--+---+---+++--+-++-+++--++-----+--+-++-+--+---?----	0.369	4.53525	300029	-2.341	0.01924	0.4086	3.4213	0.447	0.6548	0.5102	0	-5.694	1.244e-08	0.9676	0	0.9676	0	0.0028945	0.0017435	0.0968947
20	47714291	rs13039993	A	G	0.5921	7.353	1.942e-13	???--???++++++++--++++--++?+-+--+++-?+-++++++++---?+++-+???+-????---++--+-++	0.6255	0	276693	4.852	1.225e-06	0.4871	0	2.816	0.004859	0.7157	0	4.603	4.172e-06	0.2636	24.6231	0.2636	24.6231	0.0078786	0.0017409	6.02143e-06
6	27358166	rs35120058	A	G	0.8977	-7.353	1.945e-13	-++--+-+-+---+----++--++------+-+--+--+----+-+---+-+-+++---------++---++----	0.6577	0	300486	-4.405	1.058e-05	0.945	0	0.783	0.4338	0.5128	0	-5.322	1.025e-07	0.1167	49.1267	0.1167	49.1267	0.0039386	0.0017577	0.0250496
20	47648856	rs1022688	A	G	0.3304	7.352	1.946e-13	-+-+++--?-++----++-+-+-+-------+---+---+-++++-++-+?++-+-+++++---++++-+-+----	0.03922	23.637	290977	-5.344	9.081e-08	0.3753	5.34313	0.641	0.5216	0.1087	24.6326	-8.46	2.67e-17	0.5478	0	0.5478	0	0.0077239	0.0017449	9.58076e-06
20	47745084	rs6063359	C	G	0.4067	-7.352	1.947e-13	+---+------+---++-+-+-++-++---+----+--++-+--+++--++-+?--+-++-----++----?--+-	0.4167	2.525	298407	-4.069	4.715e-05	0.5313	0	0.99	0.3223	0.5728	0	-5.091	3.565e-07	0.4755	0	0.4755	0	-0.0079531	0.001741	4.9204e-06
20	47541600	rs6012564	A	G	0.5924	7.352	1.949e-13	---++----+--------++-+-++-+--+++++-+--+---+-+-++++-+-----+--+---++++-+------	0.1479	14.5883	300486	-3.113	0.001855	0.02985	31.569	-0.367	0.7133	0.7066	0	-5.403	6.538e-08	0.8003	0	0.8003	0	0.0078262	0.0017403	6.89287e-06
17	56824123	rs304292	A	G	0.6239	7.351	1.969e-13	-+-++++++--+++++-+++--+++--+++++-+++-++-+-++++---+++++--++++++-++++-++-+++-+	0.9651	0	300486	3.264	0.001098	0.8786	0	1.454	0.1461	0.9565	0	5.647	1.633e-08	0.1583	42.2188	0.1583	42.2188	-0.0051372	0.0017418	0.00318346
6	27357414	rs34332556	C	G	0.8979	-7.351	1.972e-13	???++???++?+-?+-?+-?----+-?+-----+--?++-+--+-+-++-??-?-0???-+????++-+-+?++++	0.01807	31.1833	270709	2.421	0.01549	0.3799	5.95075	-1.573	0.1157	0.0848	28.9591	7.057	1.704e-12	0.9915	0	0.9915	0	0.0039452	0.0017578	0.0248028
17	44091886	rs9891103	T	C	0.2239	-7.35	1.981e-13	-++++++-+++-++++-++----+++-++--+++++-------+-+---++++?----+++-+-++--+-+?++++	0.597	0	298407	2.659	0.007835	0.2756	10.8198	-0.871	0.384	0.9591	0	5.486	4.12e-08	0.9961	0	0.9961	0	0.001478	0.0017374	0.394939
6	29240378	rs3117326	T	C	0.1076	7.35	1.988e-13	-----++++--+------++-++++-+---+-++-+----+--++--+-++-+---+++--+--+--+--++----	0.001179	36.3247	300486	-1.862	0.06257	0.02735	32.0814	-1.313	0.1891	0.02461	36.2367	-6.782	1.184e-11	0.2886	20.1915	0.2886	20.1915	-0.0033857	0.0017408	0.0517845
16	28829228	rs28888764	A	G	0.347	7.349	1.994e-13	-+-++---?+-+---++++++--+-------+---+----+++-+-++-++-+---++-+----+-++-+-+--+-	0.6802	0	291414	-4.481	7.44e-06	0.4694	0.0256345	-0.752	0.4519	0.6887	0	-5.003	5.644e-07	0.7577	0	0.7577	0	-0.0032754	0.0017351	0.0590609
17	56485358	rs1476596	A	G	0.6101	7.349	1.995e-13	+-+-+-++-+--+++-+---+-+-++-++++-++---+++-----0--+-?--++++--+-+-++---+-++++-+	0.08792	18.6447	300049	3.371	0.0007503	0.5615	0	-0.95	0.3423	0.2349	14.809	7.084	1.404e-12	0.1259	47.5799	0.1259	47.5799	-0.005661	0.0017406	0.00114472
17	56709077	rs420878	A	G	0.3752	-7.349	1.997e-13	---+++----++++++-+-+----+--+++-+++-+-++-+++-+-+--++-++---++-+-+++++-+-+-++++	0.4845	0	300486	1.943	0.05206	0.684	0	0.92	0.3574	0.4802	0	6.47	9.804e-11	0.4545	0	0.4545	0	0.0050391	0.0017415	0.00380978
20	47731158	rs1043361	T	C	0.5967	7.349	2.003e-13	+++---+-?++-++++-+---++-+++++++-+++-+++-++------+-+--+++-++-++++-++-++--++++	0.1037	17.4743	291414	5.836	5.354e-09	0.7172	0	-0.575	0.5651	0.07944	27.6516	7.549	4.394e-14	0.3571	7.20693	0.3571	7.20693	0.0080595	0.0017424	3.73938e-06
20	47758719	rs10432730	A	G	0.4061	-7.347	2.023e-13	+++---+-?++-++++-++--++-+++++++-+++-++++++------+-+--+++-++-++++-+--++--++++	0.1286	15.824	291414	5.825	5.725e-09	0.7671	0	-0.634	0.5264	0.08743	26.7721	7.587	3.278e-14	0.4282	0	0.4282	0	-0.0079507	0.0017406	4.93287e-06
20	47662627	rs2426109	C	G	0.5927	7.347	2.027e-13	???----?+++++?-+--+++---++?+-+--+++-?++++++++++---++++-+???+-???+--+++--+-++	0.7108	0	277116	4.418	9.943e-06	0.6092	0	2.778	0.005461	0.7055	0	4.546	5.467e-06	0.2536	26.3623	0.2536	26.3623	0.0078485	0.0017407	6.51929e-06
3	49812606	rs35210174	T	C	0.3171	-7.347	2.033e-13	---++-+-+-+++-++++--++--++++++-+-++-++-++++-+-+++-+-+---+++++++++--+++--++++	0.6286	0	300486	4.314	1.601e-05	0.9343	0	-0.793	0.428	0.4993	0	5.392	6.958e-08	0.1164	49.1784	0.1164	49.1784	-0.006907	0.0017351	6.87385e-05
3	49808517	rs34522271	A	G	0.6825	7.345	2.051e-13	-++--+-+-+---+----++--++------+-+--+--+----+-+---+-+-+++---------++---++----	0.6466	0	300486	-4.399	1.087e-05	0.9459	0	0.793	0.4277	0.4988	0	-5.38	7.442e-08	0.1154	49.3585	0.1154	49.3585	0.0069123	0.0017353	6.7936e-05
1	32070766	rs4949219	A	G	0.3749	-7.345	2.052e-13	---+++---++------++--++++-+--+++-+-+--++------++-+-+-----------+-+++---+----	0.6208	0	300486	-2.743	0.006092	0.4977	0	0.323	0.747	0.8276	0	-6.142	8.165e-10	0.8398	0	0.8398	0	0.0022832	0.0017485	0.191615
20	47678770	rs3092039	A	G	0.4077	-7.345	2.062e-13	++--+-+-+-+--+-+-++++--+-+---++++-++--++--++--++++--++--++-+----+-++--++----	0.868	0	300486	-3.069	0.00215	0.8262	0	0.667	0.5045	0.9486	0	-6.628	3.411e-11	0.7942	0	0.7942	0	-0.0078418	0.0017408	6.64661e-06
17	56506160	rs72628392	A	G	0.6336	7.345	2.065e-13	+++++-+-+--+++--+--+++--++++++++-+---+-+++-----+--+-++++-+++--+-++--+-++++++	0.2759	8.33985	300486	2.694	0.007058	0.5811	0	-0.171	0.864	0.3943	4.56498	5.524	3.312e-08	0.06081	59.3331	0.06081	59.3331	-0.0049729	0.0017417	0.0043013
20	47543604	rs6019537	A	G	0.5924	7.344	2.066e-13	----+-----+-+-----+++-++-+----+---+--------++-+--+?++---+-++-+---++-++------	0.2394	10.0227	300049	-4.067	4.762e-05	0.4731	0	-1.349	0.1772	0.09216	26.2736	-4.252	2.12e-05	0.5404	0	0.5404	0	0.0078405	0.0017402	6.62674e-06
20	47656787	rs6122747	A	G	0.5932	7.344	2.068e-13	???+-???++++-?+-++-++---++?++--+++--?+++++---++-++?+-?-+???-+????+-+-+-?++++	0.1483	16.4715	273335	1.96	0.05005	0.9313	0	-0.33	0.7418	0.03828	34.226	6.351	2.142e-10	0.6151	0	0.6151	0	0.0078402	0.0017406	6.65733e-06
2	155733278	rs2591178	A	G	0.4748	-7.342	2.108e-13	-+++?++++--++++-?+-?+---++-++---++--+++++----+-++-++-?-+-----+++-+-++++?++++	0.0193	27.5377	298126	3.5	0.000465	0.2489	12.3768	-1.396	0.1628	0.114	25.8644	6.715	1.885e-11	0.3281	12.892	0.3281	12.892	0.002596	0.0017476	0.13743
20	47818567	rs35298920	T	C	0.4032	-7.339	2.146e-13	+++----+-++-----+-+-+-+++++---+--------+---+-+-++--+--+-+--+-+----+--+-+--+-	0.221	10.8183	300486	-1.985	0.04711	0.5509	0	-0.854	0.3932	0.2274	15.3212	-6.598	4.154e-11	0.4253	0	0.4253	0	-0.0076823	0.0017424	1.03896e-05
20	47675525	rs6125531	A	G	0.4085	-7.339	2.157e-13	---------+---+-+-+--+++--+-----++-+-+-+--+----+-+-------+-++---+-+++++++----	0.1077	17.0978	300486	-1.85	0.06432	0.7868	0	0.166	0.8685	0.06643	29.2052	-6.55	5.746e-11	0.2154	32.8258	0.2154	32.8258	-0.0079021	0.0017408	5.64677e-06
20	47774343	rs56131635	A	G	0.4081	-7.338	2.168e-13	+--??-?+--++?--+?-????-?-+------+--?++?--+----+--+---?---+-+?+---+?+-++?--+-	0.4834	0	295889	-3.408	0.0006532	0.2324	13.7871	-2.319	0.02042	0.8792	0	-4.501	6.758e-06	0.1859	37.6818	0.1859	37.6818	-0.0079435	0.0017407	5.03385e-06
20	47774166	rs11698902	A	G	0.5922	7.338	2.175e-13	+++++++++-----+-+-++-+-++-++++++++-+-+-++-++++-+-+++++---+---++++---+-++++++	0.006403	31.1434	300486	2.726	0.006414	0.6296	0	0.685	0.4934	0.001624	48.2196	7.435	1.044e-13	0.1184	48.8404	0.1184	48.8404	0.0079655	0.0017407	4.73805e-06
3	52626443	rs2336147	T	C	0.5014	-7.337	2.179e-13	???----?+++++?-+--+++---++?+-+--+++-?++++++++++---++++-+???+-???+--+++--+-++	0.6847	0	277116	4.43	9.413e-06	0.5411	0	2.798	0.005146	0.7281	0	4.555	5.25e-06	0.2545	26.1993	0.2545	26.1993	0.00023149	0.0017422	0.894293
20	47776919	rs6125576	A	T	0.5969	7.337	2.18e-13	???++-+?---+-++--?-+-++---??-+--+---?-+--+-----+-+?--------+-????+++--------	0.8246	0	275445	-3.17	0.001527	0.8328	0	-0.883	0.3773	0.7841	0	-5.064	4.102e-07	0.07691	56.1916	0.07691	56.1916	0.0079383	0.0017437	5.30274e-06
3	49808190	rs7431078	A	G	0.3171	-7.335	2.21e-13	--++++-+++++----++++-+-+-+?+-+-+++-+-+++-+-------+--+-----++-----+--+-+-++++	0.1881	12.5006	297920	1.877	0.06058	0.1961	15.7904	0.984	0.325	0.3934	4.61656	5.669	1.435e-08	0.5373	0	0.5373	0	-0.0069024	0.0017352	6.95184e-05
1	32140039	rs4949456	A	G	0.3634	-7.335	2.221e-13	++++---++-+-++---------+++-+-+---++-+++-++---++---+-++++-++++-+++--+++++++++	0.0003955	39.0477	300486	4.404	1.06e-05	0.09692	23.068	-1.212	0.2257	0.003794	45.2005	5.163	2.426e-07	0.09421	53.0296	0.09421	53.0296	0.0035419	0.00174	0.0417927
20	47656889	rs2426108	T	C	0.4084	-7.334	2.227e-13	???++++?-----?+-++---+++--?-+-++---+?----------+++----+-???-+???-++---++-+--	0.6642	0	277116	-4.428	9.526e-06	0.5323	0	-2.753	0.00591	0.6999	0	-4.55	5.368e-06	0.2626	24.812	0.2626	24.812	-0.0078317	0.0017407	6.82182e-06
17	56520426	rs147621327	A	G	0.3658	-7.334	2.234e-13	-+++?++++--+--+-?+-?+---++-+++--++--+-+++--+-+-++--+-?-+-----+++----+++?++++	0.031	25.272	298126	3.535	0.000407	0.3651	5.81365	-1.485	0.1374	0.1537	22.2419	7.099	1.258e-12	0.3378	11.0056	0.3378	11.0056	0.0049064	0.0017415	0.00484284
4	106218428	rs2647238	T	C	0.415	7.334	2.235e-13	++--+--+-+--+--+-+++--++++++++++++--++-+++---+----+-+++++--+++-+----++--++++	0.1896	12.3545	300486	3.724	0.0001961	0.5632	0	0.684	0.4938	0.04819	31.7406	5.768	8.021e-09	0.7038	0	0.7038	0	0.0048328	0.0017441	0.00558985
3	49847623	rs1799845	A	G	0.6834	7.332	2.269e-13	???--???+++++?-+--+++-+-++?+-+--+++-?++++++++++---?+++-+???+-????--+++--+-++	0.6517	0	275414	4.498	6.868e-06	0.5122	0	2.84	0.004511	0.6962	0	4.644	3.412e-06	0.2716	23.2344	0.2716	23.2344	0.0072134	0.0017357	3.23966e-05
2	100796850	rs7583067	T	C	0.2394	7.332	2.274e-13	+---+-+--+----++++-+-++-++--------+-?-++----++++-++++-----+--+++-------+--+-	0.3089	6.96388	298560	-2.024	0.04298	0.6891	0	-1.193	0.2329	0.1503	21.009	-5.436	5.449e-08	0.2641	24.5473	0.2641	24.5473	-0.0020105	0.0017461	0.249551
3	49889919	rs62260729	T	C	0.6851	7.331	2.285e-13	-+--+-+--------++++++?---+-+-+++----+------++----++-+--+--+-+--+++++--+-----	0.0287	25.0989	300394	-5.329	9.866e-08	0.003742	41.1834	-0.752	0.4521	0.7285	0	-3.241	0.001192	0.7557	0	0.7557	0	0.007045	0.001735	4.89553e-05
20	47819305	rs6063371	A	G	0.4035	-7.331	2.286e-13	+++++-++---+++-+++-+-+++-++++--+--++++---+-++-+-+++---+-+-++---++++-++++++-+	0.09999	17.6385	300486	0.907	0.3643	0.3624	5.96643	-0.009	0.9925	0.6575	0	7.271	3.568e-13	0.2412	28.4863	0.2412	28.4863	-0.0076604	0.0017438	1.11815e-05
1	32088534	rs4949449	T	G	0.3859	-7.33	2.308e-13	???+-???+-++-?+-?+-??---+-?+--+++++-?-+-+----+++--?+-?--???-+????++---+?++++	0.0219	30.0136	273057	2.366	0.018	0.08035	30.3916	-0.749	0.4542	0.173	20.6349	6.448	1.135e-10	0.7833	0	0.7833	0	0.0019534	0.0017588	0.26671
6	27521096	rs35848276	T	C	0.1017	7.33	2.31e-13	+++--++++++++-+++-----+-+-+++0+++++++++-+--++-+-+--++---+++-++++-+-++++-++-+	0.194	12.1307	300486	4.934	8.06e-07	0.5338	0	0.011	0.9911	0.1441	21.5132	4.546	5.474e-06	0.2865	20.5929	0.2865	20.5929	-0.0038146	0.0017395	0.0283139
17	56484257	rs9303398	T	C	0.6106	7.328	2.33e-13	--+-+-++++-+-+++-++++-+++++-+-++0-++++-++-++--+--+++-+--++-++--+++---++-++++	0.3521	5.13294	300486	2.823	0.004753	0.7216	0	-1.163	0.2447	0.4092	3.62065	5.59	2.269e-08	0.3203	14.3591	0.3203	14.3591	-0.0058017	0.0017406	0.000858816
17	56472366	rs4793941	A	G	0.3897	-7.328	2.337e-13	+++---+++--++++++--++----+-++---+-+-++--++++++--+-+-+++++++++++-+---+++-++++	0.6213	0	300486	2.791	0.00525	0.4895	0	-0.324	0.7456	0.8323	0	6.143	8.121e-10	0.8403	0	0.8403	0	0.0057188	0.0017404	0.00101695
6	28038929	rs71559070	A	G	0.1026	7.328	2.341e-13	--++----+-++--+-+--+----+---+-++---+-----++++--+--------+---++----+-+-------	0.885	0	300486	-3.03	0.002444	0.8969	0	-0.621	0.5346	0.5748	0	-4.969	6.727e-07	0.6087	0	0.6087	0	-0.0036273	0.0017404	0.0371364
3	52622086	rs2590838	A	G	0.4999	7.327	2.349e-13	+++-+++++-----+-+-++--+++-++++++++-+-+-++-++++-+-+-+++++-+--++--+---++++++++	0.008781	29.9988	300486	2.304	0.02124	0.6277	0	0.789	0.4302	0.0011	49.4601	6.88	5.979e-12	0.3153	15.326	0.3153	15.326	-0.00024405	0.001744	0.888708
3	49891002	rs10865959	C	G	0.3168	-7.327	2.352e-13	-+++?+++++++-++-?+-??--?++?+++--++--+++-+----+-++-+++?-+-----+++----+++?++++	0.1142	17.4674	295310	4.272	1.941e-05	0.7318	0	-0.905	0.3657	0.09369	28.8344	7.837	4.632e-15	0.4978	0	0.4978	0	-0.0070831	0.0017364	4.52168e-05
2	100795995	rs13010436	A	G	0.7606	-7.327	2.353e-13	???++???--------++----++--?-+-++---+?-+--------+++?---+-???-+????+++--++-+--	0.6538	0	276693	-4.841	1.293e-06	0.4951	0	-2.847	0.004411	0.7491	0	-4.602	4.195e-06	0.2604	25.187	0.2604	25.187	0.0019955	0.001746	0.253087
6	27688841	rs13212318	A	C	0.8957	-7.326	2.368e-13	???--???++++++?+--++++--++?+-+--+++-?+-++++++++---?+++-+???+-????---++--+--+	0.6426	0	274440	4.894	9.902e-07	0.4767	0	2.842	0.004478	0.765	0	4.545	5.492e-06	0.2535	26.3804	0.2535	26.3804	0.0040576	0.0017387	0.0196155
20	47658351	rs11696929	T	C	0.4079	-7.326	2.378e-13	+++++++++-----+-+-++-+-++-++++++++-+-+-++-++++-+-+++++---+---++++---+-++++++	0.005248	31.8312	300486	2.688	0.007192	0.606	0	0.666	0.5055	0.001446	48.5993	7.474	7.758e-14	0.1284	47.1552	0.1284	47.1552	-0.0078383	0.0017408	6.71274e-06
20	47770756	rs2273653	A	C	0.5969	7.326	2.379e-13	???++++?-----?+-+----+-+--?-+-++---+?----------+++----+-???-+???-++---++-+--	0.7189	0	277116	-4.384	1.164e-05	0.6252	0	-2.831	0.004634	0.6822	0	-4.603	4.165e-06	0.295	19.0502	0.295	19.0502	0.0079986	0.0017437	4.4978e-06
17	57129882	rs12452313	A	C	0.3278	-7.326	2.38e-13	---+?++++--+-++-?+-?+--?++?++--+++--+-+++++--+--+---+?-+--++-+++---+-++?++++	0.1109	17.5877	295413	3.158	0.001587	0.338	7.37882	-0.51	0.6102	0.2441	15.4543	7.157	8.234e-13	0.7035	0	0.7035	0	0.0056724	0.0017418	0.00112772
6	29109197	rs3130715	A	G	0.1076	7.325	2.394e-13	--++++++---+++-+--+---++-++-+-+++--+---++++++--+-+----+----++--++-++--+?----	0.2287	10.5178	300310	-3.272	0.001067	0.1606	18.0143	-1.258	0.2082	0.3102	10.0022	-5.614	1.977e-08	0.9497	0	0.9497	0	-0.0033815	0.0017406	0.0520475
6	98224217	rs112375785	A	G	0.1464	7.325	2.396e-13	----++-+-----++--++--++++-------------+---+-------++-+-+---+-----+----+-----	0.5447	0	300486	-4.411	1.027e-05	0.8826	0	-2.649	0.008062	0.1158	23.9698	-5.544	2.963e-08	0.3115	16.0369	0.3115	16.0369	-0.0014706	0.0017107	0.390005
6	28119055	rs72846780	T	C	0.8974	-7.324	2.399e-13	+++--+--+++++++++-----+-+-++--+++++++++-++-++-+-++-+--+-+++-++++-+-++++-++++	0.073	19.7707	300486	4.488	7.203e-06	0.1866	16.2444	-0.109	0.913	0.1015	25.3304	4.052	5.071e-05	0.7619	0	0.7619	0	0.0037141	0.0017401	0.0328095
17	56482039	rs723991	A	G	0.3897	-7.324	2.407e-13	+-+++-----+++--++-+--+++-++--++----+--+--+--+----+-++?--+++-+-+--+---+-?--+-	0.4696	0.346739	298407	-2.834	0.004598	0.3966	4.08364	0.903	0.3665	0.8124	0	-5.66	1.516e-08	0.6317	0	0.6317	0	0.0058317	0.0017406	0.000807049
6	27701122	rs17750424	T	C	0.8957	-7.321	2.453e-13	???--???+++++?-+--++++--++?+-+--+++-?++++++-+++---?+++-+???+-????--+++--+--+	0.67	0	275414	4.577	4.72e-06	0.5391	0	2.796	0.005182	0.7139	0	4.616	3.905e-06	0.251	26.8114	0.251	26.8114	0.0040248	0.0017391	0.0206538
6	28114818	rs35749575	T	G	0.1026	7.321	2.454e-13	---++-+-+-+++-++++--++--++++++-+-++-++-++++-+-+++-+-+---+++++++++--+++--++++	0.6638	0	300486	4.258	2.063e-05	0.952	0	-0.785	0.4324	0.4962	0	5.4	6.648e-08	0.117	49.0749	0.117	49.0749	-0.0037094	0.0017401	0.033037
3	49770032	rs3749237	A	G	0.316	-7.321	2.455e-13	+-+??+?+++?+?++??+????-?++-+-----+-?-+--+++?-+----+++-++++-+?-+--+?-+++?++++	0.1288	17.5152	296101	3.746	0.00018	0.1553	19.1792	-0.534	0.593	0.3161	11.5505	5.616	1.951e-08	0.8814	0	0.8814	0	-0.0068207	0.0017354	8.48399e-05
6	26739487	rs35144506	A	G	0.8886	-7.321	2.463e-13	???--???--?-+?-+?-+?++++-+?-+++++-++?--+-++-+-+--+??+?+0???+-????--+-+-?----	0.01861	31.0409	270709	-2.44	0.0147	0.38	5.94271	1.587	0.1126	0.08388	29.0659	-6.989	2.773e-12	0.9903	0	0.9903	0	0.0036789	0.0017401	0.0344985
6	29244219	rs144447022	T	G	0.1076	7.321	2.466e-13	???--???+++++?-+--++++--++?+-+--+++-?++++++++++---?+++-+???+-????--+++--+--+	0.6234	0	275414	4.702	2.572e-06	0.474	0	2.82	0.004799	0.7256	0	4.627	3.717e-06	0.2298	30.3944	0.2298	30.3944	-0.0034013	0.0017408	0.0507224
16	28844068	rs7498491	A	T	0.6567	-7.32	2.474e-13	-+----+--+-+++++---++--+++-+++--+++-++-++-++-++-+-++++++----++-++-+++++-++++	0.2569	9.17348	300486	2.021	0.04327	0.7353	0	1.374	0.1693	0.04187	32.7641	5.401	6.628e-08	0.8831	0	0.8831	0	0.0034311	0.0017359	0.048095
20	47554392	rs4810898	A	G	0.4072	-7.32	2.488e-13	-++--+-+-+---+----+---++------+-+--+--+----+-+---+-+-+++---------++---++----	0.7505	0	300486	-4.367	1.258e-05	0.9591	0	0.748	0.4545	0.5804	0	-5.049	4.44e-07	0.1359	45.907	0.1359	45.907	-0.0076899	0.0017403	9.93116e-06
17	56832965	rs12450766	C	G	0.3299	-7.318	2.521e-13	???++???------?-++----++--?-+-++---+?-+--------+++?---+-???-+????+++--++-+--	0.6709	0	274440	-4.906	9.299e-07	0.5016	0	-2.833	0.004606	0.7739	0	-4.606	4.114e-06	0.2605	25.1684	0.2605	25.1684	0.0055311	0.0017415	0.00149348
6	29098796	rs3130777	C	G	0.8924	-7.317	2.532e-13	???++++?-----?+-+------+--?-+-++---+?-------------??--+-???--???++++--++-++-	0.3365	6.32172	275125	-4.264	2.008e-05	0.4392	1.6445	-3.394	0.000688	0.5419	0	-4.044	5.26e-05	0.08948	53.8816	0.08948	53.8816	0.0033496	0.0017406	0.0543
14	33292743	rs2239647	A	C	0.4473	-7.317	2.54e-13	???---??+++++?-+--+++-+-++?+-+--+++-?++++++++++---?+++-+???+-????--+++--+-++	0.6869	0	275772	4.366	1.264e-05	0.5322	0	2.871	0.004089	0.7225	0	4.617	3.898e-06	0.2778	22.1386	0.2778	22.1386	0.0059267	0.0017447	0.00068124
17	44126765	rs113434679	A	C	0.1913	-7.317	2.545e-13	-+---++--+--+--+++---+--+-----+---++--++--+-+--+++--+--+----+---++++---+----	0.007652	30.506	300486	-4.821	1.428e-06	0.04335	29.2298	0.666	0.5057	0.1481	21.1895	-6.462	1.036e-10	0.2292	30.5073	0.2292	30.5073	0.0008495	0.0017196	0.621312
6	27698857	rs13202291	A	G	0.8956	-7.316	2.555e-13	???+????+-++-++-?+-??--?++?++---++--?+++++---++++-?--?-++---+????++-+-+?++++	0.0136	31.8421	278163	2.392	0.01675	0.8379	0	-1.519	0.1286	0.02079	40.7446	7.954	1.81e-15	0.8206	0	0.8206	0	0.0040203	0.0017391	0.020797
17	56507063	rs143148833	T	C	0.3204	-7.316	2.555e-13	???++???--------+-----++--?-+-++--++?-+--------+++?---+-???-+????++---++-++-	0.5414	0	276693	-4.816	1.467e-06	0.3498	7.92603	-3.058	0.002226	0.8026	0	-4.45	8.593e-06	0.1704	40.2271	0.1704	40.2271	0.0052889	0.0017409	0.00238067
20	47750377	rs6066975	A	C	0.4027	-7.315	2.575e-13	+---+-+-----+--+?-+??+++--++-+++---++------++-+--++++?+++++++------+---?----	0.4104	2.82232	298129	-2.371	0.01776	0.5362	0	1.146	0.2518	0.7769	0	-6.492	8.465e-11	0.8804	0	0.8804	0	-0.0079555	0.0017438	5.06407e-06
17	56501420	rs2429369	A	G	0.3675	-7.315	2.578e-13	???++++?-----?+-++---+++--?-+-++---+?----------+++----+-???-+???-++---++-+--	0.6584	0	277116	-4.433	9.314e-06	0.5119	0	-2.75	0.005954	0.7118	0	-4.545	5.502e-06	0.2594	25.3546	0.2594	25.3546	0.0049466	0.0017415	0.00450505
20	47714214	rs6125543	T	C	0.5926	7.315	2.578e-13	---+-+-+++---++-?+-?++-+++-+++--+++--++-++---+-++-+++?-----++++-++--+++?++++	0.05624	21.8561	298232	2.141	0.03225	0.2104	14.7212	-0.392	0.6953	0.2009	18.1618	6.369	1.903e-10	0.5107	0	0.5107	0	0.0078664	0.001741	6.23448e-06
6	27702425	rs13193542	T	G	0.1043	7.315	2.579e-13	???--???++++++?+--++++--++?+-+--+++-?+-++++++++---?+++-+???+-????---++--+--+	0.57	0	274440	4.928	8.303e-07	0.4115	3.61244	2.816	0.004857	0.7364	0	4.54	5.637e-06	0.2373	29.1283	0.2373	29.1283	-0.0040255	0.0017391	0.0206348
6	27702561	rs13193480	A	G	0.8957	-7.315	2.581e-13	???++???------+-++----++--?-+-++---+?-+--------+++?---+-???-+????++---++-+--	0.5689	0	276693	-4.908	9.223e-07	0.4033	4.17632	-2.828	0.004678	0.75	0	-4.539	5.65e-06	0.2134	33.1551	0.2134	33.1551	0.0040246	0.0017387	0.02063
20	47815944	rs111386480	T	C	0.5967	7.314	2.593e-13	+-+-+--+++---+-+-++++-+-+-+++--+++--+++++++--++++-++++++-+--+-++---+++--++-+	0.05711	21.2813	300486	5.06	4.194e-07	0.123	20.836	1.563	0.1181	0.2995	10.5626	5.621	1.896e-08	0.01481	71.4095	0.01481	71.4095	0.0077066	0.0017424	9.73868e-06
6	29095908	rs3130773	A	G	0.1077	7.313	2.619e-13	+++-+--+---+-+--+++-++----++-+--++-+++---+++--++-----++-+-+-+++-+-++++++++++	0.02212	26.192	300486	1.584	0.1131	0.2984	9.52273	0.665	0.5059	0.06732	29.0931	7.192	6.401e-13	0.4087	0	0.4087	0	-0.0033486	0.0017407	0.0543876
2	100796248	rs4851262	A	C	0.7606	-7.311	2.66e-13	+++----++-+-++-------+-+++-+-+---++-+++-++---++---+-++++-++++-+++--+++++++++	0.0004735	38.6252	300486	4.378	1.198e-05	0.09771	22.9955	-1.124	0.2611	0.004099	44.8995	5.178	2.245e-07	0.09241	53.351	0.09241	53.351	0.0019943	0.001746	0.253349
3	49779764	rs13086130	T	C	0.3165	-7.31	2.663e-13	???++???------?-++----++--?-+-++---+?-+--------+++?---+-???-+????+++--++-++-	0.619	0	274440	-4.924	8.471e-07	0.4432	1.29603	-2.842	0.004477	0.7651	0	-4.544	5.532e-06	0.2535	26.3804	0.2535	26.3804	-0.0070915	0.0017353	4.37925e-05
17	56468569	rs9904993	T	G	0.3895	-7.31	2.68e-13	--+-+-----+-++--+---+-++----+--++-+-+--+-+-++-+++++-+-++--+-+----------+--+-	0.1091	16.9996	300486	-3.868	0.0001098	0.3744	5.30527	1.386	0.1657	0.2432	14.249	-4.759	1.947e-06	0.3329	11.9718	0.3329	11.9718	0.0057281	0.0017404	0.0009977
6	27837183	rs17695758	T	C	0.8956	-7.309	2.686e-13	--++++-+++++++--+++-++++++++++-+++++-++-+---+-++-++-+---++++++++--+-+++-++++	0.7799	0	300486	5.319	1.043e-07	0.6786	0	-0.247	0.805	0.8914	0	5.155	2.531e-07	0.478	0	0.478	0	0.0040128	0.0017386	0.0209991
3	49884913	rs13316065	T	C	0.3119	-7.309	2.699e-13	???--???++++++?+--++++--++?+-+--+++-?+-++++++++---?+++-+???+-????---++--+--+	0.6108	0	274440	4.891	1.003e-06	0.4454	1.1433	2.813	0.004906	0.7524	0	4.545	5.495e-06	0.2438	28.0403	0.2438	28.0403	-0.0071802	0.0017331	3.43005e-05
6	27818535	rs34194357	A	G	0.8956	-7.308	2.702e-13	-++---+--+-++--+-+++++-+---++-----++--+--------+-+?++-+---+++-+-++--++------	0.1052	17.3655	300049	-1.163	0.245	0.2826	10.5258	-2.295	0.02173	0.3203	9.23119	-6.774	1.25e-11	0.6179	0	0.6179	0	0.0040209	0.0017386	0.0207396
3	49884261	rs9819511	T	C	0.3132	-7.307	2.723e-13	--+---+--+-----+?----+++--+-++++---+-++--+++---++++--+++-----+----++--+-----	0.2741	8.46455	300406	-2.308	0.02099	0.5239	0	0.831	0.4062	0.3677	6.30957	-5.803	6.503e-09	0.7168	0	0.7168	0	-0.0072915	0.0017343	2.61879e-05
3	49758764	rs4768	A	G	0.6841	7.307	2.725e-13	+--++-+-+-+++-++++-+++--++++++-+-++-++-++++-+-+++-+-+---+++++++++--+++--++++	0.7452	0	300486	4.39	1.134e-05	0.9583	0	-0.729	0.4661	0.5711	0	5.047	4.477e-07	0.135	46.0626	0.135	46.0626	0.0070795	0.0017354	4.51648e-05
6	27818482	rs36116761	C	G	0.8956	-7.307	2.727e-13	+----++-+++--++-++--+-+++-++---+-++-+++++--+-+-++-++++-+-+-+---+-++-++-?++++	0.5126	0	300310	3.703	0.0002129	0.2502	12.2999	1.018	0.3088	0.7272	0	5.12	3.063e-07	0.4804	0	0.4804	0	0.0040207	0.0017386	0.0207444
16	28582849	rs151231	A	G	0.4678	7.307	2.732e-13	+++---++++---+-?---+--+-+++++-++++--+++-+++--+--+---++-++-++-+++++-++++-++++	0.3886	3.65963	300127	4.872	1.105e-06	0.4726	0	0.773	0.4397	0.3534	7.14087	5.205	1.942e-07	0.3282	12.8667	0.3282	12.8667	5.065e-05	0.0017479	0.976884
6	29144532	rs9257566	T	C	0.1302	7.307	2.739e-13	+++-+++++----++-++-+--+-+++--++-++--+-+++++++++---++-+---+++-----++++++-++-+	0.3299	6.04683	300486	3.225	0.001259	0.3447	6.93779	1.531	0.1258	0.5856	0	4.223	2.412e-05	0.02785	67.0728	0.02785	67.0728	-0.0027076	0.0017708	0.126261
20	47820626	rs6125590	T	G	0.4039	-7.306	2.744e-13	--+-++-++---+----++-++-++++++++-++-+-+++++++-++++-++++++++---++++-+-+---++-+	0.7938	0	300486	2.2	0.02783	0.9422	0	1.958	0.05026	0.2694	12.5109	5.439	5.345e-08	0.8831	0	0.8831	0	-0.0076356	0.0017437	1.19316e-05
16	28604686	rs3743963	A	G	0.4688	7.306	2.746e-13	-----+----+-+--+-+-+-++-----+++----+--+--+-++--+++?+++---+--++--++---++--+--	0.008476	30.2847	300049	-3.936	8.289e-05	0.1571	18.4459	-0.43	0.6674	0.007622	42.3044	-5.157	2.508e-07	0.2507	26.8471	0.2507	26.8471	-4.4372e-06	0.0017472	0.997974
6	27688625	rs34064842	T	G	0.1043	7.306	2.751e-13	---++-+-++--++++----++--++++++-+-++-++-++++-+-+++-+-+---+++++++++--+++--++++	0.7212	0	300486	4.775	1.793e-06	0.9506	0	-0.869	0.3846	0.6285	0	5.149	2.623e-07	0.1398	45.2655	0.1398	45.2655	-0.0040611	0.0017394	0.0195524
20	47739415	rs3795079	T	C	0.4027	-7.306	2.755e-13	???+-???------??+?----++--?-+-++-+++?------+---+++?---+-????+????+++--++-+--	0.5001	0	271373	-4.49	7.117e-06	0.52	0	-2.725	0.00643	0.6461	0	-3.889	0.0001007	0.1258	47.5891	0.1258	47.5891	-0.0080469	0.0017439	3.94457e-06
17	57002203	rs9894064	A	C	0.3776	-7.305	2.765e-13	+--??-?+--++?--+?+????+?+?--------+?+++-----+-+--+?--?-----+?+--+??+-++?--+-	0.3226	7.10561	294985	-2.353	0.01862	0.3267	8.34097	-1.562	0.1184	0.2971	13.1101	-4.813	1.488e-06	0.5128	0	0.5128	0	0.0052082	0.0017419	0.00279062
6	29344395	rs9257803	T	C	0.1301	7.305	2.773e-13	??+--+--+--+------+++--+-----+-+-+----++--+------+?-0-+--+++------+--+++----	0.5636	0	298656	-2.673	0.007511	0.2214	14.4805	-0.841	0.4004	0.768	0	-4.927	8.332e-07	0.918	0	0.918	0	-0.0025644	0.0017772	0.149032
6	28129231	rs13197175	T	C	0.1027	7.304	2.786e-13	???--???++++++?+--++++--++?+-+--+++-?+-++++++++---?+++-+???+-????---++--+--+	0.6231	0	274440	4.926	8.41e-07	0.4715	0	2.849	0.004392	0.7499	0	4.527	5.996e-06	0.2535	26.3804	0.2535	26.3804	-0.0037199	0.0017402	0.0325462
6	29031142	rs3117143	A	C	0.1078	7.303	2.813e-13	-+-++---?+-+---++++++--+-------+---+----+++-+-++-++-+---+--+----+-++-+-+--+-	0.7202	0	291414	-4.479	7.5e-06	0.5105	0	-0.77	0.4414	0.7037	0	-4.931	8.175e-07	0.7758	0	0.7758	0	-0.0034649	0.0017405	0.0465157
6	29046418	rs3117145	A	T	0.8933	-7.303	2.815e-13	+++--+-+--++----+-++--++------+-+--++-+-+--+-+---+-+-+++---------++----+----	0.7066	0	300486	-4.87	1.118e-06	0.9512	0	0.88	0.3786	0.62	0	-5.243	1.584e-07	0.1354	45.9849	0.1354	45.9849	0.0035393	0.0017404	0.0419952
2	100796182	rs11691486	T	C	0.7606	-7.303	2.817e-13	+++++-+++-----+-+-++-+-++-++++++++-+-+-++-++++-+-+++++---+---++++---+-++++++	0.005212	31.8541	300486	2.692	0.0071	0.605	0	0.666	0.5055	0.001446	48.5993	7.479	7.474e-14	0.1279	47.2388	0.1279	47.2388	0.001984	0.001746	0.255817
22	42541349	rs5758605	A	G	0.4533	-7.302	2.832e-13	-++--+++++-+--++-+-+-+-+-+--++-+++++++++---+++-+-++++--+++++--+++--+++++++++	0.4411	1.51664	300486	4.636	3.549e-06	0.267	11.3161	-0.32	0.7493	0.8385	0	4.48	7.479e-06	0.3599	6.62932	0.3599	6.62932	-0.0020657	0.0017453	0.236592
3	49808981	rs11717463	T	C	0.3159	-7.302	2.842e-13	-+---++--+--+--+-+---+--------+---++--++--+-+--+++?-+-------+---++++---+----	0.01769	27.3284	300049	-4.668	3.042e-06	0.1082	22.286	0.404	0.6861	0.1047	25.0187	-6.278	3.436e-10	0.2197	32.096	0.2197	32.096	-0.0068484	0.0017349	7.90133e-05
2	100796598	rs7596385	A	T	0.7605	-7.302	2.842e-13	++--++--------+--+--+++-++-+-+--+-++---++-++-+--++--------+-+---+++--+++-+--	0.4669	0.46582	300486	-3.653	0.0002587	0.6146	0	-0.008	0.9935	0.3175	9.41208	-4.608	4.068e-06	0.4766	0	0.4766	0	0.0019764	0.0017464	0.257757
1	32105447	rs6425777	C	G	0.6139	7.301	2.847e-13	-++--++-+++++-+++-++++-++++-+-+++++---++++--+++-+++-++-++++--+-++-+-++--++++	0.003896	32.8168	300486	1.853	0.06389	0.005087	40.0219	0.91	0.363	0.1404	21.82	5.94	2.852e-09	0.8471	0	0.8471	0	-0.0018511	0.0017537	0.291172
16	28582142	rs193628	T	G	0.4602	7.301	2.848e-13	???--???++++++??-?++++--++?+-+--+++-?++++++++++---?+++-+????-????---++--+-++	0.6687	0	271373	4.688	2.758e-06	0.4893	0	2.86	0.004242	0.758	0	4.496	6.933e-06	0.296	18.8751	0.296	18.8751	-3.7802e-05	0.0017471	0.982738
3	49738945	rs6804655	T	C	0.3156	-7.301	2.849e-13	+-+-----++-+--++++-+-----++-++++-++-++-+-+---+---++--++--+--+++-++++-+++++++	0.136	15.2858	300486	1.175	0.2399	0.3189	8.37037	0.624	0.5328	0.3079	10.0207	6.514	7.339e-11	0.9305	0	0.9305	0	-0.0070938	0.0017354	4.35512e-05
16	28561581	rs149278	T	C	0.5353	-7.3	2.87e-13	-+-+-+--+-++---+-+++-+-+--+----+--+++---+++++0++-+?++----++-+-+--+++-+----+-	0.08831	18.6142	300049	-3.366	0.0007639	0.5617	0	0.948	0.3432	0.2359	14.7412	-7.084	1.404e-12	0.1259	47.5799	0.1259	47.5799	0.00015892	0.001745	0.927434
20	47663382	rs3091427	A	G	0.4027	-7.3	2.882e-13	---+-++-+++-+-++---+--++++--+-++--+---+++---++--+++++--+---+---+-+----------	0.02727	25.2124	300486	-1.73	0.08366	0.3085	8.95434	-0.652	0.5142	0.07193	28.5289	-7.181	6.917e-13	0.4166	0	0.4166	0	-0.0079355	0.0017438	5.34811e-06
17	56455260	rs12601867	C	G	0.5731	7.299	2.893e-13	+-+-++++++-+--++-+-+++-++-?+++-+-+--++-+-++-++-+--+-+--++-+++-++++--++--++++	0.1213	16.2868	297920	4.673	2.962e-06	0.6134	0	1.597	0.1104	0.008778	41.6626	5.182	2.194e-07	0.893	0	0.893	0	-0.0066248	0.00174	0.000140443
6	27815639	rs13194781	A	G	0.8955	-7.297	2.945e-13	???++???------?-++----++--?-+-++---+?-+--------+++?---+-???-+????+++--++-+--	0.6355	0	274440	-4.825	1.403e-06	0.4405	1.49471	-2.815	0.00488	0.7673	0	-4.611	4e-06	0.2613	25.0375	0.2613	25.0375	0.0040597	0.0017386	0.0195434
16	28580333	rs151232	T	C	0.4677	7.297	2.949e-13	???--???+++++?-+--++++--++?+-+--+++-?++++++++++---?+++-+???+-????--+++--+--+	0.6415	0	275414	4.691	2.717e-06	0.4923	0	2.817	0.00485	0.7243	0	4.617	3.896e-06	0.2502	26.9362	0.2502	26.9362	6.9246e-05	0.0017478	0.968396
3	49765483	rs2307021	C	G	0.6856	7.296	2.962e-13	+--------++-----+---++---++-----+---+-++-+---+++------+------------+-++---+-	0.8924	0	300486	-3.755	0.0001735	0.7232	0	-1.138	0.255	0.9601	0	-5.706	1.159e-08	0.0777	56.044	0.0777	56.044	0.0070226	0.001735	5.17726e-05
6	27834139	rs13199906	C	G	0.8956	-7.296	2.97e-13	???--???++++++++--++++--++?+-+--+++-?+-++++++++---?+++-+???+-????---++--+-++	0.6323	0	276693	4.852	1.221e-06	0.4863	0	2.822	0.004778	0.7363	0	4.577	4.713e-06	0.2459	27.676	0.2459	27.676	0.0040263	0.0017387	0.0205731
16	28556147	rs4788081	T	C	0.6432	7.296	2.971e-13	---+++---++------++--++++-+--+++-+-+--++------++-+-+-----------+-+++---+----	0.6163	0	300486	-2.609	0.009085	0.4917	0	0.41	0.682	0.8779	0	-6.335	2.366e-10	0.8131	0	0.8131	0	0.0020614	0.0017362	0.235082
6	27685825	rs34432857	A	G	0.1044	7.296	2.975e-13	???--+-?+++-+--++?+-+--+++??+-++-+++?+-++-+++++-+-?++++++++-+????---++++++++	0.8315	0	275445	3.1	0.001935	0.8406	0	0.838	0.4019	0.7965	0	5.728	1.015e-08	0.103	51.4799	0.103	51.4799	-0.0041149	0.0017392	0.0179846
20	47721385	rs755589	A	G	0.4034	-7.296	2.975e-13	--++-++-+---+-++----+-+--+-----+---+++++-----+-+++----+---+-+-+--++----+--+-	0.08564	18.7186	300486	-3.377	0.0007331	0.06595	26.2428	-2.171	0.02993	0.1901	17.9543	-3.991	6.569e-05	0.7649	0	0.7649	0	-0.007981	0.0017424	4.64301e-06
16	28538640	rs62034325	A	G	0.6275	7.295	2.989e-13	+--+--+-----+-++----+-+-+-?-+-+--+--+---+-+++++-++---+-+-++-+++++++++--+----	0.3691	4.46189	297920	-2.076	0.03792	0.2724	11.1172	-0.847	0.3968	0.6477	0	-5.939	2.873e-09	0.5739	0	0.5739	0	0.0020711	0.0017373	0.233222
6	27685348	rs34409918	A	G	0.8957	-7.292	3.055e-13	+++--+-+--++----+-++--++------+-+--++-+-+--+-+--++-+-+++---------++---++----	0.649	0	300486	-4.823	1.414e-06	0.9168	0	0.941	0.3465	0.6259	0	-5.108	3.258e-07	0.1403	45.1855	0.1403	45.1855	0.0041144	0.0017388	0.0179721
20	47703810	rs6125539	A	C	0.4027	-7.291	3.073e-13	???+-???------??+?----++--?-+-+--+++?------+---+++?---+-????+????+++--++-+--	0.4938	0	271373	-3.9	9.617e-05	0.5255	0	-2.85	0.004365	0.5917	0	-3.799	0.0001454	0.1317	46.6192	0.1317	46.6192	-0.0080247	0.0017439	4.19566e-06
22	42531210	rs28670611	T	C	0.4472	-7.291	3.087e-13	+++-+------++--+?-+?-+++-++--++---+++-++-0-++-------+?--++-++---+-+----?----	0.2052	11.8527	298232	-2.976	0.002925	0.2863	10.2072	0.107	0.9148	0.4696	0	-6.499	8.089e-11	0.3986	0	0.3986	0	-0.0024725	0.0017376	0.15475
20	47646210	rs3091862	C	G	0.5968	7.289	3.116e-13	+++-+--+---+-+--+++-++----++-+---+++++-+-+++--++--+--++-+-+-+++++-++++++++++	0.06056	20.9311	300486	1.937	0.05271	0.35	6.64457	0.794	0.4271	0.1085	24.6515	6.96	3.409e-12	0.4206	0	0.4206	0	0.0080459	0.0017437	3.94639e-06
20	47645427	rs3091497	T	G	0.5972	7.289	3.127e-13	+-----+----+++--+-++--+--++--++----++-+-++-++-+-++--------++-+++-+++-+-+----	0.1341	15.3995	300486	-5.524	3.315e-08	0.326	7.97617	1.185	0.2361	0.5341	0	-4.875	1.09e-06	0.2338	29.7424	0.2338	29.7424	0.0080386	0.0017437	4.02624e-06
3	49776178	rs11714957	T	C	0.315	-7.288	3.134e-13	-+--+--+-----++---+--++++?------------+---+-------++-+-+---++----+----+-----	0.6585	0	300108	-4.088	4.348e-05	0.885	0	-2.523	0.01162	0.1948	17.6186	-5.607	2.062e-08	0.3797	2.53411	0.3797	2.53411	-0.0069925	0.0017354	5.59371e-05
6	28977217	rs3130891	C	G	0.1074	7.288	3.135e-13	--+-++----+-+--++++--+--+++-++-+++-+++-++++++++-++++++-+--++-+++--+-+-+-++++	0.4817	0	300486	2.782	0.005407	0.4563	0.783808	2.132	0.03298	0.4626	0.199601	5.656	1.55e-08	0.451	0	0.451	0	-0.0032242	0.0017406	0.0639735
17	56856594	rs4793957	A	T	0.3798	-7.288	3.136e-13	+-++---+--+++---?-+?-?----+--+--+--++------++--+----++----+-+++-++-++--+--+-	0.4418	1.50075	300219	-2.994	0.002752	0.5022	0	-1.543	0.1228	0.2659	13.2586	-5.25	1.525e-07	0.6259	0	0.6259	0	0.005461	0.0017415	0.00171435
20	47717405	rs6125547	T	C	0.5973	7.288	3.153e-13	???+-???++++-++-?+-??---++?+---+++--?-+-+----++++-?+-?--???++????++++-+?++++	0.005393	35.8182	274336	2.964	0.003041	0.03029	37.7739	-1.662	0.09642	0.1876	19.4691	6.142	8.149e-10	0.8779	0	0.8779	0	0.0080204	0.0017439	4.24131e-06
3	49993191	rs11130226	T	G	0.4792	7.287	3.165e-13	+-+++--++-++-++---+++-++-+++++-+++--++--++-+-++----+-+++++++-+++----+++-++++	0.03136	24.5291	300486	4.778	1.774e-06	0.09184	23.5416	-0.285	0.7758	0.2076	16.6991	6.629	3.385e-11	0.2813	21.5071	0.2813	21.5071	0.0044103	0.0017507	0.0117652
17	56808996	rs172565	A	T	0.3784	-7.285	3.213e-13	???--???+++++?-+--++++--++?+-+--+++-?++++++-+++---?+++-+???+-????--+++--+--+	0.6529	0	275414	4.618	3.867e-06	0.5271	0	2.825	0.00473	0.7054	0	4.615	3.922e-06	0.2512	26.7757	0.2512	26.7757	0.0050764	0.0017417	0.00356123
17	44095467	rs58879558	T	C	0.7768	7.285	3.222e-13	-+++--+----+--+-+-----++-+-++-+-+-------------+++---+--+-+++-+-+-+-+-+++--+-	0.3241	6.28749	300486	-2.567	0.01027	0.8133	0	-2.672	0.007535	0.05302	31.017	-4.948	7.512e-07	0.4756	0	0.4756	0	-0.00057613	0.0017286	0.738907
6	28091580	rs35345226	A	G	0.8974	-7.283	3.253e-13	???--???--?-+?-+?-+?++++-+?-+++++-++?--+-++-+-+--+?++?+0???+-????--+-+-?----	0.01254	32.6454	272263	-2.252	0.02433	0.3278	9.60896	1.477	0.1397	0.06596	31.2904	-7.071	1.535e-12	0.9914	0	0.9914	0	0.0036434	0.0017402	0.0362911
6	28079598	rs13203816	T	C	0.8974	-7.283	3.259e-13	???++???------?-++----++--?-+-++---+?-+--------+++?---+-???-+????+++--++-++-	0.6118	0	274440	-4.915	8.896e-07	0.4702	0	-2.821	0.004791	0.7328	0	-4.541	5.59e-06	0.2522	26.5965	0.2522	26.5965	0.0036116	0.0017404	0.0379665
6	28080628	rs34588114	A	C	0.1027	7.283	3.27e-13	+-+--+-++----+++-++---+++-+-+--+++--++-++++--++++-++++++-+--+-+++--+++--++-+	0.06424	20.5727	300486	3.513	0.0004426	0.2866	10.187	1.562	0.1182	0.1014	25.3378	5.159	2.482e-07	0.02461	68.0273	0.02461	68.0273	-0.0036437	0.0017404	0.0362911
3	49751585	rs2291542	T	C	0.3164	-7.283	3.273e-13	???++++?-----?+-++---+++--?-+-++---+?------+---+++?---+-???-+???-++---++-+--	0.6703	0	276679	-4.368	1.256e-05	0.525	0	-2.774	0.005531	0.7073	0	-4.63	3.653e-06	0.2595	25.336	0.2595	25.336	-0.0070861	0.0017362	4.47713e-05
6	28982272	rs3131081	T	C	0.1079	7.282	3.287e-13	+--++--+?+-+---++++++--+-------+---+----+++-+-++-++-+---++-+----+-++-+-+--+-	0.6122	0	291414	-4.23	2.334e-05	0.3584	6.23648	-0.792	0.4286	0.6821	0	-5.02	5.168e-07	0.8105	0	0.8105	0	-0.0032166	0.0017408	0.0646398
3	49751900	rs11710675	A	C	0.3165	-7.282	3.29e-13	-+---++-----+--+++---+--------+---++--++--+-+--+++--+-------+---++++---0----	0.03793	23.5575	300486	-4.657	3.208e-06	0.1511	18.6876	0.358	0.7205	0.1299	22.7083	-6.292	3.138e-10	0.3743	3.66089	0.3743	3.66089	-0.0070861	0.0017363	4.48229e-05
6	28060239	rs13197574	T	C	0.8974	-7.282	3.299e-13	???--???++++++++--++++--++?+-+--+++-?+-++++++++---?+++-+???+-????---++--+-++	0.6537	0	276693	4.829	1.372e-06	0.4957	0	2.809	0.004972	0.7449	0	4.6	4.232e-06	0.2611	25.0749	0.2611	25.0749	0.0036132	0.0017401	0.0378617
3	49736172	rs11130216	A	C	0.3155	-7.282	3.3e-13	-+++?+++++++-++-?+-??--?++-+++--++--+++-+----+-++-+++?-+?+---++++-+-+++?++++	0.03262	25.4512	296338	3.645	0.0002674	0.3263	8.03188	-0.798	0.4247	0.1025	27.868	7.669	1.73e-14	0.4738	0	0.4738	0	-0.0070938	0.0017354	4.35612e-05
4	106082120	rs13123752	A	G	0.6043	7.282	3.301e-13	-+-+-+--+-++---+-+++-+-+--+----+--+++---+++++-++-+?++----++-+-+--+++-+----+-	0.06969	20.1778	300049	-3.463	0.0005333	0.4687	0.0691829	0.949	0.3425	0.243	14.2612	-7.091	1.33e-12	0.1225	48.1597	0.1225	48.1597	0.0082518	0.0017396	2.10184e-06
6	28058949	rs35902873	C	G	0.1026	7.281	3.303e-13	-+---+---+----++-+--+-++-+----+-+-+++------++-+-++----0---+++--+--++-+------	0.3091	6.91902	300486	-3.445	0.0005711	0.5026	0	0	1	0.4838	0	-5.736	9.721e-09	0.06835	57.8296	0.06835	57.8296	-0.0036374	0.0017404	0.0366185
6	28065801	rs34166054	T	C	0.8974	-7.281	3.304e-13	???++???------??+?----++--??+-++---+?-+--------+++?---+-????+????+-+--+--+--	0.6783	0	267024	-3.882	0.0001035	0.6306	0	-2.828	0.004683	0.6299	0	-4.444	8.841e-06	0.2574	25.7058	0.2574	25.7058	0.0036384	0.0017404	0.0365679
2	155675125	rs2652457	A	C	0.5248	7.281	3.307e-13	+++-+--+-+--+--+-+++--++++++++++++--++-+++---+----+-+++++--+++-+----++--++++	0.1958	12.0389	300486	3.707	0.0002096	0.5216	0	0.756	0.4496	0.06143	29.8508	5.741	9.42e-09	0.664	0	0.664	0	-0.0022268	0.0017491	0.203002
16	28549823	rs151226	A	C	0.468	7.281	3.324e-13	++-++-++++--+-+++-+-+--++-++---+++--++-++-+--++---+-+-+++-++--++---++--++-++	0.06164	20.8251	300486	4.042	5.291e-05	0.6227	0	-0.164	0.87	0.03411	34.1715	6.232	4.619e-10	0.08481	54.7238	0.08481	54.7238	-4.2885e-05	0.0017471	0.980417
1	32088171	rs10914456	T	C	0.386	-7.28	3.34e-13	-++??-?+-+++-+++?-????+?+-?++++++++?++-+--+--+-+-++++++--+-??-+-+-++++--++++	0.7928	0	295066	2.811	0.004937	0.7872	0	1.364	0.1727	0.8295	0	7.875	3.402e-15	0.8218	0	0.8218	0	0.0019512	0.0017585	0.267184
20	47797653	rs6122763	A	G	0.4066	-7.28	3.343e-13	-+--+++-+-+-----++-+-++--+---+-++--++------++-+---+-+-++-+-+++---+---++-----	0.7004	0	300486	-3.248	0.00116	0.7882	0	-0.267	0.7895	0.5751	0	-5.268	1.382e-07	0.2027	34.91	0.2027	34.91	-0.0080259	0.0017403	3.99301e-06
16	28563026	rs151228	A	G	0.4675	7.279	3.364e-13	???+????+-++-++-?+-??--?++?++---++--?++++----++++-?--?-++---+????++-+-+?++++	0.007464	34.3472	278163	2.363	0.01815	0.7811	0	-1.577	0.1149	0.0146	42.7846	7.918	2.42e-15	0.7991	0	0.7991	0	-0.00011924	0.0017474	0.945599
17	56816667	rs1975857	T	C	0.3769	-7.279	3.369e-13	???++???-----?+-++---+-+--?-+-++---+?-+--------+++?---+-???-+????++---++-+--	0.686	0	275414	-4.455	8.373e-06	0.5502	0	-2.882	0.003952	0.7191	0	-4.626	3.729e-06	0.2604	25.1684	0.2604	25.1684	0.0053113	0.0017418	0.00229351
6	28081758	rs34371502	T	C	0.8973	-7.279	3.369e-13	+-+------++-----+---++--+++-----+------+-+----++------+-------+----+-+++--+-	0.9614	0	300486	-3.031	0.002438	0.8567	0	-1.657	0.09749	0.9713	0	-5.523	3.332e-08	0.1173	49.0316	0.1173	49.0316	0.0036437	0.0017404	0.0362911
6	27840926	rs45509595	T	C	0.8992	-7.279	3.374e-13	?-+-?+-++++-+++-??+??-+++-?+---++-++-+++--+-++-+-+?+-+-+-++??-+-+---++-+++++	0.7017	0	293733	2.361	0.01823	0.7089	0	1.331	0.1831	0.5433	0	5.877	4.19e-09	0.647	0	0.647	0	0.0035601	0.0017395	0.0406912
20	47599690	rs6019570	T	C	0.59	7.278	3.383e-13	---+-++-----+-+-+-----++-------+-+-++------+---+++----+-+-----+-+++---+--+--	0.3722	4.30866	300486	-4.439	9.032e-06	0.5518	0	-3.359	0.0007814	0.562	0	-3.167	0.001539	0.07314	56.9027	0.07314	56.9027	0.0079244	0.0017402	5.2723e-06
6	28957139	rs3130890	T	C	0.1086	7.278	3.386e-13	+++-+-+----+-------+--+--+---++-----+--++-+-+-++------++--+++-+-+--+---+----	0.2306	10.3707	300486	-4.064	4.834e-05	0.09269	23.4611	-0.407	0.684	0.5234	0	-5.309	1.102e-07	0.9961	0	0.9961	0	-0.003241	0.0017408	0.0626325
6	27592003	rs35715914	T	C	0.1013	7.277	3.41e-13	---++----++-------+--++++-+--+++-+-+--+---+-+-++++-+------------++++--------	0.318	6.54555	300486	-3.501	0.0004632	0.1026	22.5527	-0.166	0.8681	0.7525	0	-5.634	1.763e-08	0.9275	0	0.9275	0	-0.0036507	0.0017393	0.0358179
3	49819779	rs35474403	T	G	0.6841	7.277	3.411e-13	+++-+-+++--++-++++---+-+++-++--+++-+++-++--+--+----+++-++++-+-++--+-+-+++-++	0.7076	0	300486	4.973	6.601e-07	0.745	0	-0.595	0.5521	0.8526	0	4.77	1.838e-06	0.2008	35.2332	0.2008	35.2332	0.0070981	0.0017362	4.3461e-05
20	47676281	rs6066959	A	G	0.4025	-7.277	3.412e-13	++---+-+--+-+---++---------++-+-+-----+--++-++--++--+-----+-+++-+--++--+----	0.3516	5.15334	300486	-2.003	0.0452	0.283	10.3943	-0.39	0.6968	0.6984	0	-6.238	4.434e-10	0.6845	0	0.6845	0	-0.0079934	0.0017439	4.56983e-06
3	49852419	rs62260719	A	G	0.3157	-7.277	3.425e-13	+--++--+-----+---+----+----+-+-----+++----++---+---+--+----++-+--+-+--++----	0.004212	32.5637	300486	-1.888	0.05906	0.005298	39.8632	-0.943	0.3455	0.1398	21.875	-5.91	3.422e-09	0.8499	0	0.8499	0	-0.0073365	0.0017355	2.36483e-05
6	27413924	rs13195040	A	G	0.8982	-7.276	3.43e-13	???+????+-++-++-?+-??--?++?++---++--?+++++---++++-?--?-++---+????++-+-+?++++	0.01117	32.6978	278163	2.436	0.01486	0.7727	0	-1.54	0.1234	0.02334	40.0292	7.934	2.114e-15	0.7936	0	0.7936	0	0.0038503	0.0017557	0.0283074
6	27413345	rs13191474	T	C	0.1017	7.276	3.432e-13	???--???++++++++--++++--++?+-+--+++-?+-++++++++---?+++-+???+-????---++--+-++	0.6629	0	276693	4.843	1.278e-06	0.5128	0	2.841	0.0045	0.747	0	4.58	4.648e-06	0.2642	24.5283	0.2642	24.5283	-0.0038663	0.0017558	0.027663
3	49871641	rs2352967	T	C	0.3164	-7.276	3.438e-13	???----?+++++?-+--+++---++?+-+--+++-?+-++++++++---++++-+???+-???+--+++--+-++	0.6659	0	277116	4.43	9.435e-06	0.5238	0	2.802	0.005073	0.7161	0	4.545	5.494e-06	0.2576	25.669	0.2576	25.669	-0.0073643	0.0017367	2.23152e-05
22	42540551	rs2743461	A	G	0.5393	7.276	3.451e-13	--+++-++--+-----+-+---++-+----+---++--++---+--+++-?----+-+---+---+-+---+--+-	0.4305	1.95429	300049	-4.851	1.228e-06	0.3796	5.05867	0.033	0.9739	0.8698	0	-5.075	3.879e-07	0.04347	63.0815	0.04347	63.0815	0.0015619	0.0017423	0.370024
3	49823024	rs11920900	C	G	0.3144	-7.275	3.454e-13	-+-+++--?-++---+++++---+-----+-+---+--+--+--+-+++++-+----+-+--+-+-++---+----	0.5404	0	291414	-5.374	7.702e-08	0.6879	0	-0.132	0.8946	0.3778	5.60101	-5.432	5.588e-08	0.8837	0	0.8837	0	-0.0070285	0.001735	5.1027e-05
20	47573598	rs932451	A	G	0.5884	7.274	3.478e-13	-+-++----++-------++--+++-+--+++++-+--+-----++++++-+----++--+---++++-+------	0.2179	10.9644	300486	-2.821	0.004781	0.03205	31.1437	-0.247	0.8046	0.8472	0	-5.038	4.714e-07	0.7909	0	0.7909	0	0.0079176	0.0017402	5.37279e-06
3	49894030	rs2276864	T	C	0.6826	7.273	3.503e-13	+--------++-----+---++---++-----+---+-++-+---+++------+------------+-++---+-	0.8698	0	300486	-3.761	0.000169	0.7175	0	-1.151	0.2497	0.9508	0	-5.711	1.123e-08	0.06103	59.2889	0.06103	59.2889	0.0070505	0.0017349	4.82725e-05
3	49821878	rs13084243	C	G	0.3144	-7.273	3.504e-13	???--???++++++-+--++++--++?+-+--++--?++++++++++---?+++-+???+-????--+++--+--+	0.6159	0	276693	4.81	1.512e-06	0.4555	0.439725	2.834	0.004597	0.7315	0	4.618	3.871e-06	0.2505	26.8828	0.2505	26.8828	-0.0070351	0.001735	5.01996e-05
6	28981519	rs3130894	C	G	0.1081	7.273	3.504e-13	+-+--++-+++-+++-++-++++++--++-+--++--+++++++-+--+-++++++-+---+----+-++-?++++	0.6431	0	300310	3.077	0.00209	0.4445	1.43899	2.671	0.007566	0.6574	0	5.21	1.89e-07	0.6496	0	0.6496	0	-0.0031285	0.0017407	0.0722936
6	26582327	rs9393735	A	G	0.8636	-7.271	3.568e-13	--+-++-+--+--+--?-+++++-------+---+++-++----+--+++--+++-------+--+++---+-+--	0.602	0	300406	-4.975	6.532e-07	0.6563	0	0.561	0.5749	0.6515	0	-3.613	0.0003027	0.791	0	0.791	0	0.00306	0.0017694	0.0837336
6	27865902	rs66868086	A	T	0.899	-7.271	3.574e-13	---++---+-+++--++---++--++++++-+-++--+-+-++++-+++-+++---++++++++---+++--++++	0.9204	0	300486	3.598	0.0003207	0.9157	0	0.209	0.8343	0.8042	0	4.785	1.713e-06	0.2201	32.0344	0.2201	32.0344	0.0036185	0.0017399	0.0375578
3	49892896	rs10049413	A	G	0.6834	7.27	3.584e-13	++++++++++--+++-+---+---+-++++-+-+--++-++++--+----++--++++++++++---+++-+++++	0.07864	19.288	300486	6.586	4.507e-11	0.5791	0	-0.104	0.9172	0.08081	27.4995	8.951	3.531e-19	0.4624	0	0.4624	0	0.0070036	0.001735	5.42126e-05
6	98520526	rs2503776	A	T	0.5193	7.27	3.599e-13	-+-+-++++++--++-?+-?+---+--+++-+++---+-++----+-+++++-?++-----+++-+--+++?++++	0.2315	10.5748	298232	3.259	0.001117	0.4129	3.18755	-0.619	0.5358	0.42	2.97421	6.682	2.352e-11	0.6234	0	0.6234	0	0.0048842	0.0017434	0.00508745
20	47701339	rs2075678	A	G	0.5979	7.27	3.607e-13	++-++-+++---+-+-+-+-+--++-++---++++-++-++-+--++---+-+-++++-+--++---+++-++-++	0.08006	19.1706	300486	3.88	0.0001045	0.7557	0	0.224	0.8224	0.02567	35.9822	6.024	1.699e-09	0.03852	64.2644	0.03852	64.2644	0.0082108	0.001744	2.5015e-06
4	106233359	rs2647261	A	G	0.3643	-7.269	3.62e-13	+-+-+------++--+?-+?-+++-++---+---+++-+--++++-+-----+?--+++++---+-++---?----	0.1508	14.7659	298232	-3.17	0.001527	0.2676	11.2787	0.596	0.5511	0.4094	3.70014	-6.662	2.703e-11	0.6312	0	0.6312	0	-0.0052428	0.0017341	0.00250035
6	28974265	rs3129794	T	G	0.1079	7.269	3.625e-13	--+---+--------+------+---+--+++-+++-++---++--++++++-+++----+-+----+-+++----	0.3621	4.72198	300486	-1.993	0.04622	0.8889	0	0.345	0.7303	0.3452	7.66105	-7.3	2.887e-13	0.5296	0	0.5296	0	-0.0032099	0.0017408	0.0651929
22	42543288	rs2743462	A	G	0.5471	7.269	3.632e-13	-+-+-+-++++--++-?+-++---++-++--+++---++++++----++++++?++-----+++-+--+++?++++	0.04831	22.6181	298327	3.266	0.001092	0.02768	32.0121	-0.183	0.8545	0.6	0	6.36	2.014e-10	0.3798	2.53411	0.3798	2.53411	0.0020125	0.0017454	0.248903
3	49998282	rs2883057	T	C	0.5226	-7.269	3.632e-13	--+---+--------+------+---+--+++-+-+-++---++--+++++--+++----+-+----+++-+----	0.2476	9.59063	300486	-2.064	0.03899	0.8303	0	0.241	0.8099	0.2385	14.564	-7.299	2.897e-13	0.461	0	0.461	0	-0.0044375	0.0017513	0.011285
6	28954293	rs3129791	A	G	0.1078	7.268	3.64e-13	-++---+--+-+---+-++++--+---++-----++-++--------+-+?++-++---++-+-++-+++------	0.04682	22.5431	300049	-1.384	0.1664	0.1197	21.3123	-2.137	0.03256	0.3342	8.35217	-6.811	9.702e-12	0.3589	6.8323	0.3589	6.8323	-0.0031212	0.0017407	0.0729625
4	106116961	rs1391440	C	G	0.4683	7.268	3.645e-13	???+????+-++-++-?+-??--?++?++---++--?+++++---++++-?--?-++---+????++-+-+?++++	0.01225	32.2994	278163	2.297	0.02165	0.8453	0	-1.496	0.1347	0.01885	41.331	7.965	1.657e-15	0.7845	0	0.7845	0	0.0056792	0.0017413	0.00110841
3	49849723	rs1799843	A	G	0.3177	-7.268	3.66e-13	???--???+++++?-+--+++-+-++?+-+--+++-?+-++++++++---?+++-+???+-????--+++--+-++	0.7036	0	275414	4.473	7.711e-06	0.5689	0	2.89	0.003849	0.7246	0	4.642	3.449e-06	0.2711	23.3129	0.2711	23.3129	-0.0072213	0.0017366	3.20701e-05
16	28607532	rs4115668	A	G	0.3389	-7.267	3.666e-13	---++++-+--+++++-+-+-------+++-++++++++-++--+-+--++-++-+-++-+-++++--+-+-++-+	0.2133	11.1858	300486	1.915	0.0555	0.5087	0	0.748	0.4544	0.2587	13.2145	6.57	5.024e-11	0.4406	0	0.4406	0	-0.0016094	0.0017345	0.353468
6	28089481	rs71559072	T	C	0.1026	7.267	3.672e-13	--++-+-++-++++----+-+--+--++--++++-+---+++++++--++?--+-+++-+-----++++++-++-+	0.2191	10.9732	300049	2.123	0.03376	0.4528	0.967472	1.217	0.2236	0.1832	18.4672	5.457	4.841e-08	0.2948	19.0939	0.2948	19.0939	-0.0036429	0.0017402	0.0363162
3	49735746	rs11130214	C	G	0.6837	7.267	3.673e-13	-+---++-+-++----+----+-+++--+-----+++-----+++---++-----++--+-+--+-++-+-+-+--	0.0004117	38.9534	300486	-4.03	5.581e-05	0.08041	24.669	-1.755	0.07919	0.0003373	52.7767	-6.434	1.24e-10	0.1567	42.4736	0.1567	42.4736	0.0070981	0.0017363	4.34911e-05
20	47783095	rs6125577	T	C	0.5931	7.267	3.674e-13	--++-+-++-++-+--+---++-+-+-+--+-+++-++-+++-+-++++-?+-+--+-+++-+++-+-++-+++-+	0.3418	5.58455	300049	2.739	0.006156	0.4434	1.50023	2.049	0.04045	0.2263	15.3976	4.972	6.612e-07	0.5099	0	0.5099	0	0.0080203	0.0017404	4.05976e-06
20	47599205	rs4810903	A	G	0.4103	-7.266	3.703e-13	--+++-+++-+++++-+++-++--+++-+--++++-++--+-+-+-++----++--++++++++--+-+++-++++	0.5022	0	300486	4.613	3.975e-06	0.3073	9.02268	-0.105	0.9164	0.8392	0	4.601	4.208e-06	0.3361	11.3475	0.3361	11.3475	-0.0079305	0.0017403	5.19039e-06
6	27884012	rs13218875	T	C	0.1039	7.266	3.715e-13	???--???++++++++--++++--++?+-+--+++-?+-++++++++---?+++-+???+-????---++--+-++	0.6937	0	276693	4.814	1.481e-06	0.5401	0	2.814	0.004886	0.7618	0	4.598	4.266e-06	0.2611	25.0749	0.2611	25.0749	-0.0036419	0.0017398	0.0363245
3	49891885	rs2352975	T	C	0.6815	7.265	3.738e-13	+--------++-----+---++---++-----+---+-++-+---0++------+------------+-++---+-	0.8834	0	300486	-3.749	0.0001775	0.7193	0	-1.16	0.2462	0.9523	0	-5.681	1.339e-08	0.07761	56.0568	0.07761	56.0568	0.0071084	0.0017363	4.24033e-05
6	27730082	rs72847313	T	C	0.1045	7.265	3.743e-13	--+----------+----+++-++-+??--+-+--++-++-+-+---++-?--+++--+---+-++++---+----	0.467	0.45349	293134	-3.536	0.0004062	0.5432	0	0.585	0.5586	0.5226	0	-5.002	5.685e-07	0.5081	0	0.5081	0	-0.0039923	0.0017392	0.021707
20	47798664	rs8118105	T	C	0.5934	7.264	3.752e-13	???++???--+-+??--?-----+++??--+----+?--++-----+-+-?-----????+????+++-----++-	0.47	0.210666	266104	-2.447	0.01442	0.6353	0	-2.25	0.02442	0.4006	4.16254	-4.488	7.188e-06	0.1116	50	0.1116	50	0.0080467	0.0017404	3.77659e-06
6	29022499	rs3117141	A	T	0.892	-7.264	3.771e-13	-++--+-+--+--+--++++--++------+-+--++-+----+-+---+-+-+++---------++---++----	0.7055	0	300486	-4.828	1.382e-06	0.9494	0	0.87	0.3844	0.6155	0	-5.274	1.334e-07	0.1388	45.4347	0.1388	45.4347	0.0033722	0.0017408	0.0527351
3	52649748	rs13083798	A	G	0.5093	-7.263	3.773e-13	???--???++++++++--++++--++?+-+--+++-?+-++++++++---?+++-+???+-????---++--+-++	0.7005	0	276693	4.823	1.412e-06	0.547	0	2.861	0.004228	0.7691	0	4.599	4.251e-06	0.2611	25.0562	0.2611	25.0562	8.3109e-05	0.0017422	0.961951
6	98505761	rs2503784	T	C	0.5195	7.263	3.793e-13	???++++?-----?+-++---+++--?-+-++---+?----------+++?---+-???-+???-++---++-+--	0.6665	0	276679	-4.377	1.205e-05	0.5281	0	-2.788	0.005303	0.7085	0	-4.549	5.38e-06	0.2553	26.072	0.2553	26.072	0.0048844	0.0017434	0.00508394
6	27647509	rs13215275	T	G	0.1043	7.262	3.81e-13	???--???++++++?+--++++--++?+-+--+++-?+-++++++++---?+++-+???+-????---++--+--+	0.6085	0	274440	4.924	8.477e-07	0.4452	1.1518	2.841	0.004495	0.7641	0	4.522	6.129e-06	0.2281	30.6839	0.2281	30.6839	-0.0041319	0.0017391	0.0175106
16	28535834	rs62034322	A	G	0.373	-7.262	3.813e-13	++++++++-++--+++++--++++--++++++-+-+-+-+-+---++--++--+-------+--+--++-++++++	0.6198	0	300486	2.91	0.003619	0.451	1.07825	1.06	0.2893	0.6269	0	5.205	1.935e-07	0.5987	0	0.5987	0	-0.0021843	0.0017372	0.208627
6	27759115	rs35037868	C	G	0.1019	7.261	3.835e-13	----+++-+--+++++-+-+-+-----+++-++++++++-+++-+-+--++-++-+-++-+-++++--+-+-++-+	0.2267	10.5503	300486	1.946	0.05167	0.4809	0	0.918	0.3587	0.3012	10.4478	6.624	3.486e-11	0.4233	0	0.4233	0	-0.0037758	0.0017396	0.0299709
6	27425349	rs41269265	T	C	0.8983	-7.261	3.84e-13	+-+------++-----+---++---++-----+---+--+-+----++------++------+----+-++---+-	0.9589	0	300486	-2.971	0.002967	0.816	0	-1.364	0.1725	0.9668	0	-5.486	4.1e-08	0.2278	30.7479	0.2278	30.7479	0.0038708	0.0017558	0.0274853
3	49975334	rs7621026	A	G	0.4792	7.261	3.85e-13	++----+--+----+---++-+-------------+++++--++-+--++--+++----------+++---+----	0.6161	0	300486	-4.111	3.932e-05	0.8039	0	0.283	0.7773	0.3649	6.4167	-4.347	1.378e-05	0.5336	0	0.5336	0	0.0044105	0.0017507	0.0117625
17	44192568	rs4630591	T	C	0.1962	-7.259	3.897e-13	-+--+++-+-+-----++-+-++--+---+-++--+-+----+++-+---+++-++++-+++---+---++-----	0.4701	0.336199	300486	-3.196	0.001392	0.5967	0	-0.535	0.5927	0.4751	0	-5.54	3.028e-08	0.1367	45.7799	0.1367	45.7799	0.00086903	0.0017227	0.613932
20	47789849	rs6122762	C	G	0.5972	7.258	3.928e-13	--+-?++++--+-++-?+-?---?++-+++--++----+-+--+-+-++--+++++--+++-++--+-+++?++++	0.07949	19.7754	299882	2.571	0.01014	0.6102	0	-1.31	0.1903	0.08441	29.0055	6.41	1.455e-10	0.7618	0	0.7618	0	0.0079763	0.0017438	4.7863e-06
6	98506949	rs2503781	A	G	0.5186	7.257	3.949e-13	???----?+++++?-+--+++---++?+-+--+++-?++++++++++---++++-+???+-???+--+++--+-++	0.6495	0	277116	4.407	1.047e-05	0.5158	0	2.742	0.006099	0.6936	0	4.546	5.474e-06	0.2585	25.5029	0.2585	25.5029	0.0048801	0.0017445	0.00514991
6	27810569	rs35819751	A	G	0.8955	-7.257	3.953e-13	+--+++--+-++-+---++++--+------+---+++----+-------+-++++--+---+-+--++---+--+-	0.7609	0	300486	-5.014	5.317e-07	0.4372	1.8429	-0.131	0.8957	0.9197	0	-4.436	9.161e-06	0.8471	0	0.8471	0	0.0040041	0.0017385	0.0212716
6	28948092	rs3130837	T	G	0.1074	7.257	3.957e-13	-----+----++++---+++-+-+-----++-+-++--+---+++-++++-+++---+--++--+++--++--+--	0.007454	30.6012	300486	-3.794	0.000148	0.1052	22.3271	0.28	0.7797	0.04219	32.7098	-5.798	6.728e-09	0.09558	52.7856	0.09558	52.7856	-0.0031543	0.0017407	0.0699681
17	43988205	rs2435204	A	G	0.7786	7.257	3.958e-13	???++++?-----?+-++---+++--?-+-++---+?----------+++----+-???-+???-++---++-+--	0.6561	0	277116	-4.41	1.035e-05	0.5307	0	-2.788	0.005297	0.6938	0	-4.545	5.494e-06	0.2571	25.7426	0.2571	25.7426	-0.0010518	0.0017231	0.541589
6	27730334	rs17750747	T	C	0.8955	-7.256	3.987e-13	???++???-----?+-++---+-+--?-+-++---+?----------+++?---+-???-+????++---++-+--	0.6885	0	275414	-4.498	6.875e-06	0.5506	0	-2.899	0.003738	0.7206	0	-4.631	3.64e-06	0.2728	23.0177	0.2728	23.0177	0.0039952	0.0017392	0.0216172
3	49995518	rs6792892	T	C	0.4772	7.256	3.987e-13	+-+-----+------++----++-+------+---+-++---++---++++--+++----+-+----+++++----	0.1548	14.1965	300486	-2.419	0.01557	0.7209	0	-0.014	0.9892	0.04088	32.9339	-5.766	8.094e-09	0.5022	0	0.5022	0	0.0045964	0.0017521	0.00870763
2	156109104	rs34402857	A	G	0.5139	7.256	3.991e-13	+-+--+++?-+-+++-+---+++-+++++++-+++-++++---+-+--+--+-+++--+-++++-++-+-+-++-+	0.5175	0	291414	4.407	1.047e-05	0.2281	13.7664	0.907	0.3645	0.7268	0	4.739	2.144e-06	0.7714	0	0.7714	0	-0.0034333	0.0017435	0.0489328
3	49997963	rs2624843	A	G	0.5204	-7.256	3.993e-13	-+--++--++-+++++-+---+--+-++++-+-+--++-++++-++---++++++---+++-+++-+++++-+--+	0.2562	9.20756	300486	4.264	2.005e-05	0.1797	16.7031	0.484	0.6283	0.7889	0	5.422	5.903e-08	0.03593	64.9082	0.03593	64.9082	-0.0044237	0.0017508	0.0115186
3	49846041	rs2234385	A	G	0.3178	-7.255	4.002e-13	-++---++++-+--++-+-+++-++++-++-+-++++++----+++-+-++++---++++---++--+++++++++	0.2768	8.29726	300486	5.28	1.294e-07	0.2877	10.1305	-0.179	0.8576	0.4673	0	5.038	4.692e-07	0.7748	0	0.7748	0	-0.0072112	0.0017366	3.28776e-05
6	27646492	rs13210634	A	G	0.8957	-7.255	4.01e-13	???--???++++++?+--++++--++?+-+--+++-?+-++++++++---?+++-+???+-????---++--+--+	0.6174	0	274440	4.907	9.237e-07	0.4597	0.0825405	2.834	0.004591	0.7488	0	4.539	5.642e-06	0.2519	26.6504	0.2519	26.6504	0.0041315	0.0017391	0.0175227
6	28989297	rs3135317	A	G	0.8922	-7.255	4.012e-13	---+++----+++-+?++++++++--------+-++---+-++++--+++++--+-----+-----+----+----	0.4329	1.85546	300127	-4.178	2.943e-05	0.3819	4.92906	-0.485	0.6274	0.4475	1.17601	-5.126	2.961e-07	0.6036	0	0.6036	0	0.0033682	0.0017409	0.0530152
6	28017250	rs13200214	T	C	0.1024	7.254	4.043e-13	???--???++++++++--++++--++?+-+--+++-?+-++++++++---?+++-+???+-????---++--+-++	0.6711	0	276693	4.829	1.374e-06	0.5363	0	2.807	0.004995	0.7334	0	4.599	4.249e-06	0.2652	24.338	0.2652	24.338	-0.0035759	0.0017405	0.0399301
6	98498892	rs2503788	T	C	0.5196	7.254	4.056e-13	???----?+++++?-+--+++---++?+-+--++--?++++++++++---?+++-+???+-???+--+++--+-++	0.585	0	276679	4.409	1.04e-05	0.4938	0	2.86	0.004238	0.6559	0	4.498	6.85e-06	0.2163	32.6599	0.2163	32.6599	0.0048933	0.0017434	0.0050038
6	29090011	rs3129112	A	G	0.1078	7.252	4.1e-13	++-+?----+--+--+?-+?-+++-++--0++--++---+-+-++-++-+---?+-+-----+-++++---?----	0.1172	16.9465	298126	-2.761	0.005761	0.6387	0	0.91	0.3629	0.101	27.1838	-6.873	6.273e-12	0.8035	0	0.8035	0	-0.0033713	0.0017409	0.052808
2	100746573	rs11692215	T	C	0.2436	7.252	4.108e-13	---------+++++-+-+--+-+--+--------+-+-+--+----+-+-----+++-+++----+++-+------	0.005244	31.8337	300486	-2.69	0.007137	0.6097	0	-0.667	0.5045	0.001421	48.6556	-7.478	7.566e-14	0.1272	47.3684	0.1272	47.3684	-0.0015907	0.0017518	0.363848
6	98506649	rs2503782	A	G	0.5188	7.25	4.159e-13	???----?+++++?-+--+++---++?+-+--++--?++++++++++---?+++-+???+-???+--+++--+--+	0.5963	0	276679	4.396	1.103e-05	0.5189	0	2.855	0.004303	0.6583	0	4.51	6.482e-06	0.1967	35.8974	0.1967	35.8974	0.0048811	0.0017443	0.00513689
6	27834085	rs13199772	A	G	0.8955	-7.25	4.176e-13	???++???--------++----++--?-+-++---+?-+--------+++?---+-???-+????+++--++-+--	0.6805	0	276693	-4.817	1.457e-06	0.5353	0	-2.817	0.004844	0.7481	0	-4.604	4.144e-06	0.2606	25.1497	0.2606	25.1497	0.003987	0.0017386	0.0218374
8	143316970	rs13262595	A	G	0.4332	-7.25	4.182e-13	???++???------?-++----++--?-+-++---+?-+--------+++?---+-???-+????+++--++-++-	0.6126	0	274440	-4.894	9.872e-07	0.4495	0.836423	-2.833	0.004611	0.7544	0	-4.539	5.645e-06	0.2414	28.4351	0.2414	28.4351	0.0057758	0.0017427	0.000918756
1	32092525	rs2271933	A	G	0.3902	-7.249	4.185e-13	++-++-+++---+-+-+---+--++-++---++++-++-++-+--++---+-+-++++-+--++---+++-++-++	0.06994	20.0435	300486	3.799	0.0001452	0.7512	0	0.069	0.9448	0.02371	36.4595	6.108	1.009e-09	0.04269	63.2668	0.04269	63.2668	0.0019402	0.0017581	0.269774
[truncated: 10,134 more rows]
