# Supplementary material for: Study of 300,486 individuals identifies 148 independent genetic loci influencing general cognitive function
Source: Nat Commun. 2018 May 29;9:2098. doi: 10.1038/s41467-018-04362-x (PMC5974083; doi:10.1038/s41467-018-04362-x)
Supplement: Supplementary file 5 — Supplementary Data 2 [file 41467_2018_4362_MOESM5_ESM.xlsx]

## Sheet: Sheet1
Supplementary Data 2. Genome-wide suggestive (1 x 10-5 > P > 5 x 10-8 ) SNP association results for the GWA meta-analysis of CHARGE-COGENT and UK Biobank general cognitive function.
CHR	BP	SNP	Allele1	Allele2	EAF	Z Score	P	Direction	HetChiSq	HetDf	HetPVal	N
1	5117366	rs184833777	T	C	0.0039	4.893	9.921e-07	?????????+????????????+?-???+-?-?+???+?+-+???-?????-+-?-++?????-????+?+?++++	26.951	24	0.3067	247842
1	20765245	rs55841684	A	G	0.0076	4.932	8.136e-07	-+--?++-++-+-++-?++?+?+-++-++-++-++-+++++++--++-+++++--+++-+--++-++--+--++++	70.158	71	0.5059	300113
1	20765507	rs75988537	T	G	0.0076	4.963	6.938e-07	-+--?++-++-+-++-?++?+?+-++-++-++-++-+++++++--++-+++++--+++-+--++-++--+--++++	70.515	71	0.4939	300113
1	20766364	rs75164623	A	G	0.0075	-4.891	1.004e-06	+-++?--+--+-+--+?----?-+--+--+--+--+-------++--+-----++---+-++--+--++-++----	69.145	72	0.5735	300208
1	20780598	rs28634293	T	C	0.0097	-4.531	5.875e-06	+-+--+-+--++++-++-++----+-+--+--+-++---+---++-++-+---+----+-++-++--++-++--+-	65.834	75	0.7661	300486
1	20818935	rs1152986	T	C	0.0138	-4.99	6.029e-07	-+++------++++--+--++----++-++--+--+---+---+---+-+--++++-----++-++-+--++-+--	87.346	75	0.1559	300486
1	20819606	rs77855246	A	C	0.0066	5.415	6.12e-08	-+-++-+-+++---++?+-???+-++-++-++-++-+++++++--+--+-++--++++-++-++--+--+-+++++	74.709	71	0.3588	300116
1	20883290	rs12565699	A	G	0.0142	-4.88	1.061e-06	-+++------++-+--+---+----++-++----++--+----+-+-+-+--+++------++-+--+++-+----	63.258	75	0.8311	300486
1	20901935	rs570641	C	G	0.0102	-4.423	9.719e-06	+-++---+----+--+?--+------++++--+--++---+--++-++-----++---+-++-+++--+-++--+-	85.943	74	0.1617	300406
1	20904858	rs1253795	T	G	0.0115	4.598	4.262e-06	-+-++++-++-+-++-?++++++-++-+--++++++++-+-++--+-++--++-+-+--++-+---++--++++-+	91.266	74	0.08446	300406
1	20975168	rs71653623	T	C	0.0061	5.086	3.658e-07	-+-??+?-++-+--++?++???+?+-??--++-++-+++-+++-++--+-?+--++++-+--+--+++-+-?++-+	72.544	63	0.1923	292019
1	20997748	rs12569006	A	T	0.0093	-4.744	2.091e-06	+-+--+-?--++++--??++---++-?--++-+-------+--+++------++++--+-++--+++---++--+-	78.426	71	0.2552	293467
1	22377543	rs3754501	A	T	0.0055	4.461	8.158e-06	-++----+++-----------++-+-+----+-+--++++--+--+++--?++--+--++-++++-+++-+++--+	61.015	74	0.8603	300049
1	22377718	rs3754500	A	G	0.0054	4.442	8.916e-06	-++----+++-----------++-+-+----+-+--++++--+--++---?++--+--++-++++-+++-+++--+	61.23	74	0.8557	300049
1	22378670	rs3754497	A	G	0.0058	4.45	8.605e-06	-++----+++-----------++-+-+----+-+--++++--+--++---?++--+--++-++++-+++-+++--+	60.954	74	0.8615	300049
1	22389388	rs16826309	A	G	0.005	-4.449	8.612e-06	+--++++---++-++-+++++--+-+?++++---++----++--+--+++?--++-++--+----+---+---++-	58.744	73	0.887	297483
1	22398905	rs34896897	A	G	0.005	-4.453	8.459e-06	+--++++---++-++++++++--+-+?++++-+-++----++--+---++?--++-++--+----+---+---++-	59.417	73	0.8742	297483
1	22401024	rs16826425	A	G	0.0056	4.503	6.713e-06	-++----+++--+--------++-+-+----+-+--++++--++-++---?++--+--++-++++-+++-+++--+	59.33	74	0.8926	300049
1	22401538	rs10917139	A	G	0.005	4.426	9.599e-06	-+-----+++--+-+------++-+-?----+-+--++++--++-+++--?++--+--++-++++-+++-+++--+	59.603	73	0.8705	297483
1	22412645	rs10917145	A	G	0.0067	-4.564	5.023e-06	+-+++++---++-+-++++++--+-+-++++-+-++----++--+--+++---++-++--+----+---+---++-	59.758	75	0.9006	300486
1	22420449	rs11577378	T	C	0.0059	4.499	6.818e-06	-+-----+++--+-+------++-+-+----+-+--++++--++-+++--+++--+--++-++++-+++-+++--+	59.6	75	0.9032	300486
1	22421113	rs12740705	T	C	0.0067	4.454	8.436e-06	-+-----+++--+-+------++-+-+----+-+--++++--++-++---+++--+--++-++++-+++-+++--+	60.936	75	0.8798	300486
1	22425642	rs10917152	T	C	0.0076	4.829	1.369e-06	-++---++++----+-?----++-+-+--0-+-+--+++++-++-++---+++--+--+--++++-+++-+++--+	71.002	74	0.5772	300406
1	22430069	rs2143103	A	G	0.0071	4.599	4.249e-06	-++--+++++------?----++-+-+--+-+-+--+++++-++-+----+++--+--+--++++-+++-+++--+	77.53	74	0.3668	300406
1	22431337	rs11580451	T	C	0.0071	4.762	1.915e-06	-++----+++----+-?----++-+-+----+-+--+++++-++-+++--+++--+--+--++++-+++-+++--+	70.68	74	0.5879	300406
1	22442171	rs34745135	C	G	0.0071	4.437	9.121e-06	-++---++++--+-+-?--?-++-+-+----+++--++++--++-++----++--+--+--++++-+++-+++--+	75.116	73	0.4096	300311
1	22461627	rs12727309	A	G	0.007	4.751	2.021e-06	-++--+++++----+------++-+-+----+-+--+++++-++-++---?++--+--+--++++-+++-+++--+	70.966	74	0.5784	300049
1	22462143	rs11584713	A	G	0.0071	4.688	2.765e-06	-++--+++++------?---?++-+-+----+-+--+++++-++-++---?++--+--+--++++-+++-+++--+	68.876	72	0.5826	299866
1	29235719	rs157194	A	G	0.0068	4.466	7.969e-06	+++-?--+++-+++++?+-?+?---+---+++++-++-++++--++----+-+++---+++++++++-+++-++++	73.832	71	0.3858	300113
1	29236582	rs157195	A	G	0.0069	-4.47	7.833e-06	---+?++---+-----?-+?-?+++-+++-----+--+----++--++++-+---+++---------+---+----	73.109	71	0.4086	300113
1	29237229	rs157196	A	G	0.0068	-4.48	7.474e-06	---+?++---+-----?-+?-?+++-+++-----+--+----++--++++-+---+++---------+---+----	73.327	71	0.4017	300113
1	29239854	rs460921	A	G	0.0069	-4.466	7.982e-06	---+?++---+-----?-+?-?+++-+++-----+--+----++--++++-+---+++---------+---+----	73.188	71	0.4061	300113
1	29250470	rs150083	A	T	0.007	4.452	8.511e-06	+++-?--+++-+++++?+-?+?---+---+++++-++-++++--++----+-+++---+-+++++++-+++-++++	75.87	71	0.3244	300113
1	29251589	rs10915209	T	C	0.0069	-4.552	5.303e-06	---+?++---+-----?-+?-?+++-+++----+---+----++--++++-+---+++-+-------+---+----	76.535	71	0.3055	300113
1	29254271	rs157213	C	G	0.0068	4.504	6.675e-06	+++-?--+++-+++++?+-?+?---+---++++--++-++++--++----+-+++---+-+++++++-+++-++++	74.296	71	0.3714	300113
1	29255106	rs157211	C	G	0.0067	4.458	8.265e-06	+++-?--+++-+++++?+-?+?---+---++++--++-++++--++----+-+++---+-+++++++-+++-++++	74.326	71	0.3705	300113
1	29266977	rs157203	A	T	0.007	4.467	7.943e-06	+++-?--+++-+++++?+-???---+---+++++-++-++++--++----+-+++---+-+++++++-+++-++++	72.008	70	0.4112	300010
1	29271611	rs169449	A	G	0.0068	4.644	3.418e-06	+++-?--+++-+++++?+-?+?---+---++++?+++-++++--++----+-+++---+-+++++++-+++-++++	79.079	70	0.2141	281282
1	29275286	rs169448	T	C	0.0071	-4.458	8.29e-06	---+?++---+-----?-+?-?+++-+++----++--+----++--++++-+---+++-+-------+---+----	73.816	71	0.3863	300113
1	29287028	rs3118118	A	G	0.0071	-4.446	8.75e-06	---+?++---+-----?-+?-?+++-+++----++--+----++--++++-+---+++++-------+---+----	73.754	71	0.3882	300113
1	29290982	rs72872802	A	G	0.0073	-4.499	6.839e-06	---+?++---+-----?-+?-?+++-+++----+---+----++--++++-+---+++++-------+---+----	76.572	71	0.3045	300113
1	29293083	rs2930841	T	C	0.0074	4.676	2.924e-06	+++-?--+++-+++++?+-?+?---+---++++?-++-++++--++----+-+++-----+++++++-+++-++++	71.245	70	0.4361	281282
1	29293271	rs2985321	A	G	0.007	4.656	3.231e-06	+++-?--+++-+++++?+-?+?---+---++++?-++-++++--++----+-+++-----+++++++-+++-++++	72.563	70	0.3935	281282
1	29294587	rs7418747	A	T	0.0071	-4.507	6.571e-06	---+?++---+-----?-+?-?+++-+++-----+--+----++--++++-+---+++++-------+---+----	73.892	71	0.3839	300113
1	29307377	rs55781160	T	C	0.0073	-4.567	4.957e-06	---+?++---+-----?-+?-?+++-+++----+---+----++--++++-+---+++-+-------+---+----	76.692	71	0.3012	300113
1	29316245	rs2762686	C	G	0.0072	-4.504	6.668e-06	---+?++---+-----?-+?-?+++-+++----++--+----++--++++-+---+++++-------+---+----	75.197	71	0.3441	300113
1	29318773	rs4360499	A	C	0.0072	-4.488	7.174e-06	---+?++---+-----?-+?-?+++-+++----++--+----++--++++-+---+++++-------+---+----	74.765	71	0.3571	300113
1	29331208	rs2486198	T	G	0.0073	-4.434	9.27e-06	---+?++---+-----?-+?-?+++-+++----+---+----++--++++-+---+++++-----+-+---+----	74.917	71	0.3525	300113
1	29332529	rs6686151	T	C	0.0072	-4.479	7.488e-06	---+?++---+-----?-+?-?+++-+++----+---+----++--++++-+---+++++-----+-+---+----	74.782	71	0.3566	300113
1	29333962	rs2985329	C	G	0.0078	-4.451	8.536e-06	---+-++---+-----?-+?-?+++-+++-----+--+----++--++++--+--++++++------+---+----	80.455	72	0.2315	300219
1	29335039	rs2985330	A	G	0.0078	-4.491	7.088e-06	---+?++---+-----?-+?-?+++-+++-----+--+----++--++++--+--+++-++------+---+----	78.416	71	0.2555	300113
1	29338797	rs2253958	A	G	0.0085	-4.642	3.455e-06	---+-++-+-+-----?-+--?-++-+-+----++--+----++--++++--+--+++++-----+-+-+-+----	75.778	73	0.3889	300314
1	29339099	rs2985332	A	G	0.0086	4.61	4.02e-06	+++-+--+-+-+++++?+-++?+--+-+-++++--++-++++--++----++-++-----+++++-+-+-+-++++	75.869	73	0.3861	300314
1	29341153	rs2788886	T	C	0.0081	4.521	6.168e-06	+++-?--+-+-+++++?+-?+?---+-+-+++++-++-++++--++----++-++---+--++++++-+-+-++++	76.862	71	0.2964	300113
1	29345647	rs2985335	A	G	0.0081	-4.445	8.784e-06	---+?++-+-+-----?-+?-?+++-+++--------+----++--++++--+--+++-++------+---+----	78.362	71	0.2568	300113
1	29352653	rs2788890	C	G	0.008	-4.482	7.394e-06	---+-++---+-----?-+?-?+-+-+++--------+----++--++++--+--+++-++------+---+----	80.207	72	0.2374	300219
1	29362973	rs4654385	A	G	0.0081	4.536	5.722e-06	+++-+--+++-+++++?+-?+?-+-+---+++++-++-++++--++----++-++---+--++++++-+-+-++++	77.078	72	0.3196	300219
1	29374306	rs2993717	T	G	0.01	4.514	6.374e-06	+++??--+?+?++++-?+??????++---??+++-?+-?++?????????++????-----++++???+++?++++	47.028	43	0.3111	265734
1	29380367	rs2762683	A	G	0.0082	-4.533	5.804e-06	---+-++-+-+-----?-+?-?+-+-+++-----+--+----++--++++--+--+++-++------+---+----	78.985	72	0.2678	300219
1	29381594	rs3003631	T	G	0.0082	4.468	7.896e-06	+++-+--+-+-+++++?+-?+?-+-+---+++++-++-++++--++----++-++---+--++++++-+++-++++	79.571	72	0.253	300219
1	29393160	rs12072831	A	G	0.0084	-4.655	3.235e-06	---+-++-+-+-----?-+--?-++-+++----++--+----++--++++--+--+++++-----+-+-+-+----	75.198	73	0.407	300314
1	29407230	rs2503015	A	T	0.008	4.48	7.47e-06	+++-?--+-+-+++++?+-?+?---+-+-++++--++-++++--++----++-++---+--++++++-+++-++++	77.762	71	0.2723	300113
1	29408145	rs6694981	T	C	0.0081	-4.442	8.933e-06	---+?++-+-+-----?-+?-?+++-+-+----++--+----++--++++--+--+++-++------+---+----	77.833	71	0.2704	300113
1	29414108	rs1767801	A	C	0.0084	4.695	2.662e-06	+++----+-+-+++++?+-++?+--+-+-++++--++-++++--++----++-++-----+++++-+-+-+-++++	73.242	73	0.47	300314
1	29416028	rs1175042	T	C	0.0079	4.504	6.661e-06	+++-?--+-+-+++++?+-?+?---+-+-++++--++-++++--++----++-++---+--++++++-+++-++++	77.781	71	0.2718	300113
1	29418033	rs2254241	A	G	0.0079	-4.517	6.266e-06	---+-++-+-+-----?-+?-?+++-+-+----++--+----++--++++-----+++-++------+---+----	78.498	72	0.2806	300219
1	29428170	rs2452770	C	G	0.0079	-4.492	7.049e-06	---+?++-+-+-----?-+?-?+++-+-+----++--+----++--++++--+--+++-++------+---+----	77.455	71	0.2804	300113
1	29436595	rs2503022	T	C	0.0079	-4.464	8.06e-06	---+?++-+-+-----?-+?-?+++-+-+----++--+----++--++++--+--+++-++------+---+----	78.009	71	0.2659	300113
1	29443723	rs2249138	A	G	0.0079	-4.593	4.37e-06	---+?++-+-+-----?-+?-?+++-+-+-----+--+----++--++++--0--+++-++------+---+----	77.525	71	0.2785	300113
1	29446811	rs2452788	A	G	0.0085	-4.605	4.115e-06	---++++-+-+-----?-+-+?-++-+-+----++--+----++--++++--++-+++---------+-+-+----	72.093	73	0.508	300314
1	29449888	rs2452769	A	G	0.0082	-4.597	4.288e-06	---++++-+-+-----?-+--?+++-+-+----++--+----++--++++--+--++++--------+-+-+----	71.302	73	0.5344	300314
1	29450173	rs1689263	A	G	0.0082	-4.611	4.01e-06	---++++-+-+-----?-+--?+++-+-+----++--+----++--++++--+--++++--------+-+-+----	71.546	73	0.5262	300314
1	29451502	rs2993710	A	G	0.0077	-4.581	4.619e-06	---+?++-+-+-----?-+?-?+++-+-+----++--+----++--++++--+--+++-++------+---+----	76.166	71	0.3159	300113
1	29451598	rs3003630	A	C	0.0082	-4.576	4.744e-06	---++++-+-+-----?-+--?+++-+-+----++--+----++--++++--+0-++++--------+-+-+----	71.65	73	0.5228	300314
1	29451895	rs2503013	T	C	0.0083	-4.59	4.431e-06	---++++-+-+-----?-+--?+++-+-+----++--+----++--++++--++-++++--------+-+-+----	71.296	73	0.5346	300314
1	29452682	rs1185776	T	C	0.0082	-4.596	4.306e-06	---++++-+-+-----?-+--?+++-+-+----++--+----++--++++--++-++++--------+-+-+----	71.802	73	0.5177	300314
1	29455002	rs2503012	A	G	0.008	4.585	4.54e-06	+++-?--+-+-+++++?+-?+?-+-+-+-++++--++-++++--++----++-++---+--++++-+-+-+-++++	77.628	71	0.2758	300113
1	29457885	rs2483717	A	G	0.0078	-4.511	6.455e-06	---+?++++-+-----?-+?-?+-+-+-+----++--+----++--++++--++-+++-++----+-+-+------	77.228	71	0.2865	300113
1	29460648	rs755293	A	G	0.0072	4.427	9.536e-06	+++-?--+-+-+++++?+-?+?---+-+-++--+-++-++++--++----++--++-++--++++++-+-++++-+	70.44	71	0.4965	300113
1	29461580	rs2493847	T	G	0.0073	-4.77	1.845e-06	---??++-?-?--??-?-????????+-+??++-+?-+?--?????????--????+--++----?????-?--+-	36.019	37	0.5149	246054
1	29463000	rs2486196	T	G	0.0071	-4.54	5.633e-06	---+?++-+-+-----?-+???+++-+-+--++-+--+----++--++++--++--+--++----+-+-+----+-	69.496	70	0.4945	300010
1	29463637	rs2493846	T	C	0.0083	-4.474	7.672e-06	---+?++++-+-----?-+?-?+++-+-+--+--+--+----++--++++--++--+++++----+-+-+----+-	71.589	71	0.4581	300113
1	29466002	rs2483718	A	G	0.0072	-4.456	8.357e-06	---+?++-+-+-----?-+?-?+++-+-+--++-+--+----++--++++--++--+--++----+-+-+----+-	71.246	71	0.4695	300113
1	29467221	rs6691387	T	C	0.0092	-4.47	7.816e-06	---+?++++-+----+?-+?-?+++-+-+-----+--+----++--++++--++--+--++----+-+-+----+-	69.107	71	0.5415	300113
1	29492225	rs2493845	T	C	0.0073	-4.497	6.878e-06	---+?++++-+----+?-+?-?+++-+-+---+-+--+----++--++++--++--+--++----+-+-+----+-	70.297	71	0.5013	300113
1	29499425	rs2483714	T	G	0.0073	-4.489	7.152e-06	---+?++++-+----+?-+?-?+++-+-+---+-+--+----++--++++--++--+--++------+-+----+-	70.67	71	0.4887	300113
1	29500815	rs2428558	T	C	0.0073	-4.506	6.612e-06	---+?++++-+----+?-+?-?+++-+-+---+-+--+----++--++++--++--+--++------+-+----+-	70.656	71	0.4892	300113
1	29505070	rs2483715	A	G	0.0099	-4.586	4.508e-06	---+?++++-+-----?-+?-?+++-+-+---+-+--+----++--++++--++--+--++------+-+----+-	70.189	71	0.5049	300113
1	29508621	rs2428557	A	C	0.0073	4.51	6.491e-06	+++-?----+-++++-?+-?+?---+-+-+++-+-++-++++--++----++--++-++--++++++-+-++++-+	70.082	71	0.5085	300113
1	29509603	rs2428556	T	C	0.0072	4.506	6.612e-06	+++-?----+-++++-?+-?+?---+-+-+++-+-++-++++--++----++--++-++--++++++-+-++++-+	70.05	71	0.5096	300113
1	29510732	rs3123564	A	G	0.0073	-4.513	6.384e-06	---+?++++-+----+?-+?-?+++-+-+-----+--+----++--++++--++--+--++------+-+----+-	70.344	71	0.4997	300113
1	29513998	rs2503019	A	G	0.0072	4.478	7.534e-06	+++-?----+-++++-?+-?+?---+-+-+++-+-++-++++--++----++--++-++--++++++-+-++++-+	70.425	71	0.4969	300113
1	29514247	rs12059677	A	G	0.0072	-4.48	7.447e-06	---+?++-+-+----+?-+?-?+++-+-+---+-+--+----++--++++--++--+--++------+-+----+-	71.35	71	0.466	300113
1	29516090	rs3000851	A	G	0.0072	-4.447	8.693e-06	---+?++-+-+----+?-+?-?+++-+-+---+-+--+----++--++++--++--+--++------+-+----+-	69.876	71	0.5155	300113
1	29518293	rs3103882	A	G	0.0072	-4.445	8.801e-06	---+?++-+-+----+?-+?-?+++-+-+---+-+--+----++--++++---+--+--++------+-+----+-	69.606	71	0.5246	300113
1	29519778	rs2640464	T	G	0.0072	-4.431	9.401e-06	---+?++-+-+----+?-+?-?+++-+-+---+-+--+----++--++++--++--+--++------+-+----+-	69.835	71	0.5168	300113
1	29525280	rs2452772	C	G	0.007	4.549	5.392e-06	+++-?--+-+-++++-?+-?+?---+-+-+++++-++-++++--++----++--++-++--++++++-+-++++-+	68.646	71	0.5571	300113
1	29529699	rs1062924	T	C	0.0072	-4.468	7.912e-06	---+?++-+-+----+?-+?-?+++-+-+---+-+--+----++--++++---+--+--++------+-+----+-	69.485	71	0.5287	300113
1	29531287	rs2640463	T	C	0.0072	-4.499	6.839e-06	---+?++-+-+----+?-+?-?+++-+-+---+-+--+----++--++++--++--+--++------+-+----+-	69.125	71	0.5409	300113
1	29541404	rs2640468	T	C	0.0073	4.455	8.406e-06	+++-?----+-++++-?+-?+?---+-+-+++-+-++-++++--++----++--++-++--++++++-+-++++-+	69.222	71	0.5376	300113
1	29542926	rs3003636	A	T	0.0073	-4.471	7.787e-06	---+?++++-+----+?-+?-?+++-+-+---+-+--+----++--++++--++--+--++------+-+----+-	69.103	71	0.5416	300113
1	29546040	rs2819609	A	G	0.0076	-4.446	8.754e-06	---+?++++-+----+?-+???+++-+-+---+-+--+----++--++++--0+--+--++------+-+----+-	66.969	70	0.5806	300010
1	29549670	rs2640470	A	G	0.0084	-4.499	6.82e-06	---+?++++-+----+?-+?-?+++-+-+---+-+--+----++--++++--0+--+--++------+-+----+-	68.814	71	0.5514	300113
1	29550902	rs2250643	A	C	0.0087	-4.53	5.894e-06	---+?++++-+----+?-+?-?+++-+-+---+-+--+----++--++++--0+--+--++------+-+----+-	68.237	71	0.5709	300113
1	29550973	rs2250641	A	C	0.0089	4.534	5.8e-06	+++-?----+-++++-?+-?+?---+-+-+++-+-++-++++--++----++0-++-++--++++++-+-++++-+	67.907	71	0.5821	300113
1	29556399	rs2819606	A	G	0.0102	-4.463	8.082e-06	---+?++-+-+----+?-+--?+-+-+-+---++++-+----++--++++---+--+-++-------+-+-+----	65.689	72	0.6866	300208
1	29557224	rs2640466	T	C	0.0102	4.5	6.78e-06	+++-?--+-+-++++-?+-++?-+-+-+-+++----+-++++--++----+++-++-+--+++++++-+-+-++++	65.561	72	0.6906	300208
1	29559397	rs2503010	A	G	0.009	-4.562	5.078e-06	---+?++++-+----+?-+?-?+++-+-+---+-+--+----++--++++--0+--+--++----+-+-+-+--+-	68.584	71	0.5592	300113
1	29559613	rs2503009	T	C	0.009	4.631	3.636e-06	+++-?----+-++++-?+-?+?---+-+-+++-+-++-++++--++----++0-++-++--++++-+-+-+-++-+	67.772	71	0.5866	300113
1	29562070	rs2503006	A	G	0.009	-4.589	4.464e-06	---+?++++-+----+?-+???+++-+-+---+-+--+----++--++++--++--+--++----+-+-+-+--+-	67.364	70	0.5671	300010
1	29562369	rs2452775	A	G	0.0089	-4.592	4.397e-06	---+?++++-+----+?-+???+++-+-+---+-+--+----++--++++--++--+--++----+-+-+-+--+-	66.837	70	0.5851	300010
1	29566552	rs2452774	A	G	0.0099	-4.717	2.394e-06	---+?++-+-+----+?-+--?+-+-+-+---++++-+----++--++++--++--+-++-------+-+-+----	65.611	72	0.689	300208
1	29566950	rs2503020	A	G	0.0087	4.676	2.926e-06	+++-?--+-+-+++++?+-???---+-+-+++++-++-++++--++----+++-++-++--++++++-+++-++-+	67.484	70	0.563	300010
1	29566979	rs2452773	T	C	0.0088	-4.693	2.69e-06	---+?++-+-+-----?-+???+++-+-+-----+--+----++--++++---+--+--++------+---+--+-	67.087	70	0.5766	300010
1	29569645	rs2640465	A	G	0.0084	-4.541	5.609e-06	---+?++-+-+----+?-+???+-+-+-+---+-+--+----++--++++--++--+--++------+---+--+-	69.164	70	0.5058	300010
1	32047632	rs945213	T	G	0.0081	4.512	6.413e-06	???++-+??++++-?-+?-++-+-++??+--++---?+--++---------+--+++++?-????---++++++-+	70.682	60	0.1629	263366
1	32062066	rs4949448	T	G	0.0112	5.172	2.314e-07	++++-+--++++-++---+++--++-?+++-+++---+--++-+-++---?+--++++-+-+++----+++-++++	93.244	73	0.05528	297483
1	32126135	rs41263967	T	C	0.0065	-4.65	3.325e-06	???--+-??-+--??+??+-??+-++??-++++--+?-+--++++-++++?+-+-----??????+++---+----	66.61	54	0.1164	261176
1	32132319	rs10914464	A	G	0.0118	5.11	3.228e-07	+-++++-++-++----+-+++--+--+++--+++--?++-+--+-++--+---+-+++++--++-+--+++++-++	93.554	74	0.06203	298560
1	32142332	rs4949458	T	G	0.0102	-5.126	2.954e-07	-+---++----++-+++----++--+---++---++?-++-++-+--+++?-+-------++--+++----+-+--	106.977	73	0.005883	298123
1	32142354	rs4949459	T	G	0.011	5.141	2.731e-07	+-+++--+++---++--++++--++-+++--+++--?+--+--+-++---?+-+++++++--++---++++-+-++	106.755	73	0.006127	298123
1	32146764	rs2297684	T	C	0.01	4.657	3.201e-06	+++++---++++--+-+-+++--+--?++---++--?+-+++---++--+?+-+--++++-+++----+++-++++	95.077	72	0.03566	295557
1	32725236	rs56348024	A	T	0.0138	4.457	8.3e-06	?+-????+--+-+++??+????-?+???++++-++-?++?+--+-+-++-??-+?-+--+?+--+??+-++?++++	54.67	51	0.337	283823
1	37857462	rs4233210	T	C	0.0081	-4.744	2.099e-06	--++++++--++-+-+-++--+++-----+-++---+-+-----++-+++---+--+--+-+++-++-------+-	77.234	75	0.4071	300486
1	38095036	rs34565418	A	G	0.006	4.418	9.956e-06	+++??+?+++---+++?-????+?++?+--+-+++++-+-+-+-++--+--++-+++-++?+++++--+--?++++	52.87	63	0.8148	296385
1	38465315	rs4634868	A	G	0.0106	4.475	7.634e-06	??-++?++-+++??-++?--+-+++-+?--+--+--?++-+--+-++-++-++++++++?-+++?-------++-+	57.463	65	0.7355	287435
1	41454959	rs35080169	A	G	0.0059	-4.756	1.976e-06	+-++--+---+-+-++?--+??-++---+-+--++-+-----+++-+-----++---++--+++--++--------	78.857	72	0.2711	300211
1	41456032	rs12743340	A	G	0.0056	4.709	2.488e-06	-+--++-+++-+-+--?-+-??+--+++-+-++--+-+++++---+-+++++--+++--++---++--+++0++++	80.348	72	0.2341	300211
1	41459146	rs34502739	A	G	0.0058	4.753	2e-06	-+--++-+++-+-+--?++-??+--+++-+-++--+-+++++---+-+-+++--+++--++---++--++++++++	81.445	72	0.2089	300211
1	41460129	rs67450703	A	G	0.0057	4.748	2.054e-06	-+--++-+++-+-+--?++-??+--+++-+-++--+-+++++---+-+++++--+++--++---++--++++++++	80.988	72	0.2192	300211
1	41460783	rs12749196	A	G	0.0054	-4.516	6.289e-06	+-++--+-----+-++?--+??-++---+-+-++--+------++-+-----++---++--+++--++--------	79.988	72	0.2427	300211
1	41461513	rs12047657	C	G	0.0054	-4.489	7.168e-06	+-++--+-----+-++?--+??-++---+-+-++--+------++-+-+---++---++--+++--++--------	80.326	72	0.2346	300211
1	41462032	rs12027691	T	C	0.0054	-4.51	6.489e-06	+-++--+-----+-++?--+??-++---+-+-++--+------++-+-----++---++--+++--++--------	80.248	72	0.2364	300211
1	41462986	rs12047078	T	C	0.0053	4.498	6.85e-06	-+--++-+++++-+--?++-??+--+++-+-+--++-++++++--+-+-+++--+++--++---++--++++++++	79.73	72	0.249	300211
1	41464455	rs12739052	A	C	0.0053	-4.516	6.29e-06	+-++--+-----+-++?--+??-++---+-+-++--+------++-+-----++---++--+++--++--------	79.839	72	0.2463	300211
1	41466221	rs12748235	A	G	0.0053	-4.493	7.021e-06	+-++--+-----+-++?--+??-++---+-+-++--+------++-+-----++---++--+++--++--------	79.356	72	0.2583	300211
1	41469043	rs13376450	A	G	0.0054	4.702	2.573e-06	-+--++-+++-+-+--?++-??+--+++-+-++--+-+++++---+-+++++--+++--++---++--++++++++	79.826	72	0.2467	300211
1	41469337	rs67460888	T	C	0.0058	4.796	1.617e-06	-+--++-+++-+-+--?++-??+--+++-+-++--+-+++++---+-+-+++--+++--++---++--++++++++	81.806	72	0.2011	300211
1	41470111	rs12023079	A	G	0.0058	-4.799	1.595e-06	+-++--+---+-+-++?--+??-++---+-+--++-+-----+++-+-+---++---++--+++--++--------	81.972	72	0.1975	300211
1	41474400	rs35044078	C	G	0.0054	4.549	5.395e-06	-+--++-+++++-+--?++-??+--+++-+-+--++-++++++--+-+-+++--+++--++---++--++++++++	79.916	72	0.2445	300211
1	41479538	rs36084778	A	G	0.0059	4.821	1.427e-06	-+--++-+++-+-+--?++-??+--+++-+-++--+-+++++---+-+-+++--+++--++---++--++++++++	82.021	72	0.1965	300211
1	41484151	rs12736566	T	G	0.0035	4.947	7.548e-07	-++????+++++?+-+?-????-?--??+++-++-?-+?+-++?-0+?++?+-+?-+-+??-+---??+++?++-+	59.068	51	0.2046	286677
1	41485077	rs11209363	T	C	0.0056	4.746	2.076e-06	-+--++-+++-+++--?++-??+--+++-+-++--+-+++++---+-+-+++--+++--++---++--++++++++	85.773	72	0.1279	300211
1	41486408	rs3738369	A	G	0.0052	-4.67	3.008e-06	+-++--+-------++?--+??-++---+-+-++--+------++-+-----++---++-++++--++--------	80.097	72	0.2401	300211
1	41488168	rs4996176	T	G	0.0054	-4.457	8.3e-06	+-++--+-------++?--+??-++---+-+-++--+------++-+-----++---++-++++--++--------	79.633	72	0.2514	300211
1	41491801	rs12031277	A	G	0.0054	4.456	8.344e-06	-+--++-+++++++--?++-??+--+++-+-+--++-++++++--+-+-+++--+++--+----++--++++++++	80.551	72	0.2293	300211
1	41493811	rs1140227	T	C	0.0061	-4.768	1.858e-06	+-++--+---+-+-++?0-+??-++---+-+--++-+-----+++-+-+---++---++--+++--++--------	80.519	72	0.23	300211
1	41498021	rs16911	T	C	0.0059	-4.786	1.703e-06	+-++--+---+---++?--+??-++---+-+--++-+-----+++-+-+---++---++--+++--++--------	82.276	72	0.1912	300211
1	41505022	rs2300658	A	G	0.0059	-4.774	1.81e-06	+-++--+---+---++?--+??-++---+-+--++-+-----+++-+-+---++---++--+++--++---+----	82.231	72	0.1921	300211
1	41508141	rs2300655	A	G	0.0059	-4.722	2.337e-06	+-++--+---+-+-++?--+??-++---+-+--++-+-----+++-+-+---++---++--+++--++--------	80.841	72	0.2225	300211
1	41508490	rs10489521	T	C	0.0059	-4.786	1.701e-06	+-++--+---+---++?--+??-++---+-+--++-+-----+++-+-+---++---++--+++--++--------	82.153	72	0.1937	300211
1	41509834	rs12729448	A	G	0.0059	-4.793	1.644e-06	+-++--+---+---++?--+??-++---+-+--++-+-----+++-+-+---++---++--+++--++--------	82.235	72	0.192	300211
1	41511053	rs2268678	A	G	0.0058	-4.788	1.682e-06	+-++--+---+---++?--+??-++---+-+--++-+-----+++-+-+---++---++--+++--++--------	82.248	72	0.1917	300211
1	41511755	rs10489520	A	C	0.0058	-4.788	1.684e-06	+-++--+---+---++?--+??-++---+-+--++-+-----+++-+-+---++---++--+++--++--------	82.117	72	0.1945	300211
1	41512664	rs12406620	A	T	0.0058	4.77	1.84e-06	-+--++-+++-+++--?++-??+--+++-+-++--+-+++++---+-+-+++--+++--++---++--++++++++	82.014	72	0.1966	300211
1	41515320	rs35444705	T	G	0.0059	4.78	1.749e-06	-+--++-+++-+++--?++-??+--+++-+-++--+-+++++---+-+-+++--+++--++---++--++++++++	82.498	72	0.1866	300211
1	41522377	rs12729586	A	C	0.0058	-4.751	2.025e-06	+-++--+-------++?--+??-++---+-+-+++-+-----+++-+-+---++---++--+++--++--------	82.338	72	0.1899	300211
1	41522510	rs34486565	T	C	0.0058	-4.753	2.009e-06	+-++--+-------++?--+??-++---+-+-+++-+-----+++-+-+---++---++--+++--++--------	82.315	72	0.1903	300211
1	41526381	rs12742379	A	G	0.0058	4.751	2.026e-06	-+--++-+++++++--?++-??+--+++-+-+---+-+++++---+-+++++--+++--++---++--++++++++	82.392	72	0.1888	300211
1	41526426	rs12722762	T	C	0.0058	-4.743	2.102e-06	+-++--+-------++?--+??-++---+-+-+++-+-----+++-+-+---++---++--+++--++--------	82.394	72	0.1887	300211
1	41528389	rs12044302	C	G	0.0059	-4.739	2.147e-06	+-++--+-------++?--+??-++---+-+-+++-+------++-+-+---++---++--+++--++--------	84.137	72	0.1552	300211
1	41528805	rs12045171	A	G	0.0056	-4.721	2.35e-06	+-++--+---+---++?+-+??-++---+-+--++-+-----+++-+-----++---++--+++--++---+----	82.993	72	0.1767	300211
1	41533012	rs12046059	A	T	0.0057	4.756	1.977e-06	-+--++-+++++++--?++-??+--+++-+-++--+-+++++---+-+++++--+++--++---++--++++++++	82.776	72	0.181	300211
1	41534357	rs12024115	T	C	0.0063	-4.521	6.168e-06	+-++--+-----+--+++-++?-+++--+-+--++-+-----+++-+-+---++---++--+++--+----+----	80.122	74	0.2931	300394
1	41539536	rs16827876	T	G	0.0058	4.716	2.409e-06	-+--++-+++++++--?++-??+--+++-+-++--+-+++++---+-+++++--+++--++---++--++++++++	81.225	72	0.2138	300211
1	41540636	rs12023623	A	G	0.0058	-4.757	1.964e-06	+-++--+-------++?--+??-++---+-+--++-+-----+++-+-+---++---++--+++--++--------	82.138	72	0.194	300211
1	41543084	rs34979067	A	G	0.0058	-4.748	2.058e-06	+-++--+-----+-++?--+??-++---+-+--++-+-----+++-+-+---++---++--+++--++--------	82.635	72	0.1838	300211
1	41543135	rs35190461	T	C	0.0058	4.739	2.152e-06	-+--++-+++++-+--?++-??+--+++-+-++--+-+++++---+-+-+++--+++--++---++--++++++++	82.524	72	0.1861	300211
1	41544279	rs2885697	T	G	0.0084	4.641	3.471e-06	++--+-++-+-+++++-+++-++--+---+---+++++++++---+++-++++-++-+-++-++++--+-++++-+	76.055	75	0.4443	300486
1	41554088	rs12022978	A	G	0.006	4.722	2.331e-06	-+--++-+++++-+--?++-??+--+++-+-++--+-+++++---+-+-+++--+++--++---++--++++++++	83.357	72	0.1696	300211
1	41558595	rs144485091	T	C	0.0064	4.76	1.938e-06	-+--++-+++++-+--?++-??+--+++-+-++--+-+++++---+-+-+++--+++--++---++--++++++++	81.945	72	0.1981	300211
1	41558996	rs12736881	A	G	0.0059	-4.733	2.217e-06	+-++--+-----+-++?--+??-++---+-+--++-+-----+++-+-+---++---++--+++--++--------	82.555	72	0.1854	300211
1	41564024	rs34386859	T	C	0.0065	-4.831	1.356e-06	+-++--+-------++?--++?-++---+-+-+++-+-----+++-+-+---++---++--+++--++--------	86.203	73	0.1384	300314
1	41569203	rs2300649	T	C	0.0061	4.784	1.718e-06	-+--++-+++++-+--?++-??+--+++-+-++--+-+++++---+-+-+++--+++--++---++--++++++++	81.73	72	0.2027	300211
1	41571021	rs11209531	T	C	0.0063	-4.753	2.006e-06	+-++--+---+-+-++?--+??-++---+-+--++-+-----+++-+-+---++---++--+++--++--------	82.093	72	0.195	300211
1	41573652	rs3820090	A	G	0.0061	4.761	1.922e-06	-+--++-+++-+-+--?++-??+--+++-+-+---+-+++++---+-+++++--+++--++---++--++++++++	81.926	72	0.1985	300211
1	41574852	rs3904243	T	G	0.0062	4.77	1.838e-06	-+--++-+++++-+--?++-??+--+++-+-++--+-+++++---+-+++++--+++--++---++--++++++++	82.157	72	0.1936	300211
1	41576357	rs11209545	T	G	0.0062	4.779	1.76e-06	-+--++-+++++-+--?++-??+--+++-+-++--+-+++++---+-+++++--+++--++---++--++++++++	82.14	72	0.194	300211
1	41586029	rs11209576	T	C	0.006	4.754	1.991e-06	-+--++-+++++-+--?++-??+--+++-+-++--+-+++++---+-+-+++--+++--++---++--++++++++	82.373	72	0.1892	300211
1	41588653	rs3766324	A	G	0.006	4.783	1.726e-06	-+--++-+++++-+--?++-??+--+++-+-++--+-+++++---+-+-+++--+++--++---++--+++0++++	82.098	72	0.1949	300211
1	41598029	rs12041523	T	G	0.006	4.664	3.108e-06	-+--++-+++++-+--?++-??+--+++-+-++--+-+++++---+-+-+++--+++--++---++--++++++++	82.049	72	0.1959	300211
1	41603978	rs12759023	T	C	0.0059	4.774	1.808e-06	-+--++-+++++-+--?++-??+--+++-+-++--+-+++++---+-+-+++--+++--++---++--++++++++	81.788	72	0.2015	300211
1	41608389	rs34286980	A	G	0.0059	4.756	1.976e-06	-+--++-+++++-+--?++-??+--+++-+-++--+-+++++---+-+-+++--+++--++---++--++++++++	81.891	72	0.1993	300211
1	41613747	rs71648534	T	G	0.006	-4.758	1.95e-06	+-++--+-----+-++?--+??-++---+-+--++-+-----+++-+-+---++---++--+++--++--------	82.071	72	0.1955	300211
1	41613750	rs71648535	A	G	0.006	-4.766	1.881e-06	+-++--+-----+-++?--+??-++---+-+--++-+-----+++-+-+---++---++--+++--++--------	82.019	72	0.1965	300211
1	41616183	rs12048187	A	G	0.0059	4.774	1.808e-06	-+--++-+++++-+--?++-??+--+++-+-++--+-+++++---+-+++++--+++--++---++--++++++++	81.992	72	0.1971	300211
1	41621182	rs12741932	A	C	0.0059	4.781	1.74e-06	-+--++-+++++-+--?++-??+--+++-+-++--+-+++++---+-+-+++--+++--++---++--++++++++	81.886	72	0.1994	300211
1	41624403	rs12748412	T	C	0.0027	-4.991	6.005e-07	+-+????-----?-+-?+????+?++?----+--+?+-?-+--?+++---?-+-?+-+-??+-++-??---?--+-	60.833	53	0.2147	291559
1	41632008	rs71648536	A	T	0.0058	-4.764	1.902e-06	+-++--+-----+-++?--+??-++---+-+--++-+-----+++-+-+---++---++--+++--++--------	81.602	72	0.2055	300211
1	41640477	rs35613919	T	C	0.0028	-5.085	3.67e-07	+--????-----?-+-?+????+?++?----+--+?+-?-+--?++----?-+-?+-+-??+-++-??---?--+-	61.059	53	0.2089	291559
1	41642700	rs12744845	C	G	0.0058	4.799	1.591e-06	-+--++-+++++-+--?++-??+--+++-+-++--+-+++++---+-+-+++--+++--++---++--++++++++	82.253	72	0.1916	300211
1	41648131	rs12742803	A	G	0.0058	-4.82	1.436e-06	+-++--+-----+--+?--+??-++---+-+--++-+-----+++-+-----++---++--+++--++--------	81.933	72	0.1984	300211
1	41651952	rs12408956	A	G	0.0058	-4.809	1.519e-06	+-++--+-----+--+?--+??-++---+-+--++-+-----+++-+-----++---++--+++--++--------	82.064	72	0.1956	300211
1	41652862	rs35992757	T	C	0.0057	-4.811	1.502e-06	+-++--+-----+--+?--+??-++---+-+--++-+-----+++-+-----++---++--+++--++--------	81.912	72	0.1988	300211
1	41661732	rs12044539	A	C	0.0055	4.818	1.448e-06	-+--++-+++-+-++-?++-??+--+++-+-++--+-+++++---+-+++++--+++--++---++--++++++++	82.39	72	0.1888	300211
1	41664204	rs12759050	A	T	0.0057	-4.816	1.464e-06	+-++--+-----+--+?--+??-++---+-+--++-+-----+++-+-+---++---++--+++--++--------	81.522	72	0.2072	300211
1	41666087	rs71648538	C	G	0.0055	-4.881	1.055e-06	+-++--+-----+--+?--+??-++---+-+--++-+-----+++-+-+---++---++--+++--++--------	81.127	72	0.216	300211
1	41670853	rs35967406	T	C	0.0054	4.827	1.386e-06	-+--++-+++++-++-?++-??+--+++-+-++--+-+++++---+-+-+++--+++--++---++--++++++++	81.352	72	0.211	300211
1	41670907	rs34216154	A	G	0.0054	-4.843	1.277e-06	+-++--+-----+--+?--+??-++---+-+--++-+-----+++-+-+---++---++--+++--++--------	82.118	72	0.1945	300211
1	41679566	rs1032728	A	T	0.0046	4.913	8.948e-07	???-+???+?+??++???+-??+--+???+-??-?+??++?+---+-+++??--++?????????+--++?+++++	44.451	40	0.2897	242811
1	41682530	rs12029321	C	G	0.0054	-4.81	1.509e-06	+-++--+-----+--+?--+??-++---+-+--++-+-----+++-+-----++---++--+++--++--------	81.197	72	0.2145	300211
1	41682998	rs35286837	T	G	0.0055	4.84	1.295e-06	-+--++-+++++-++-?++-??+--+++-+-++--+-+++++---+-+-+++--+++--++---++--++++++++	81.036	72	0.2181	300211
1	41698074	rs11209734	T	C	0.0052	-4.769	1.847e-06	+-++--+-----+--+?--+??-++---+-+--++-+-----+++-+-----++---++--+++--++--------	81.74	72	0.2025	300211
1	41698256	rs12037037	T	C	0.0054	-4.782	1.732e-06	+-++--+-----+--+?--+??-++---+-+--++-+-----+++-+-+---++---++--+++--++--------	81.308	72	0.212	300211
1	41700332	rs34813691	A	G	0.006	-4.824	1.409e-06	+-++--+-----+--+?+-+??-++---+-+--++-+-----+++-+-----++---++--+++--++--------	78.897	72	0.2701	300211
1	41701747	rs8179465	A	G	0.0052	-4.801	1.578e-06	+-++--+-----+--+?--+??-++---+-+--++-+-----+++-+-+---++---++--+++--++--------	81.57	72	0.2062	300211
1	41719434	rs2363805	T	G	0.0054	-4.724	2.308e-06	+-++--+-----+--+?+-+??-++---+-+--++-+-----+++-+-+---++---++--+++--++--------	81.593	72	0.2057	300211
1	41722295	rs71648540	A	G	0.0054	-4.812	1.497e-06	+-++--+-----+--+?+-+??-++---+-+--++-+-----+++-+-----++---++--+++--++--------	80.438	72	0.2319	300211
1	41726473	rs10524	T	C	0.0053	4.946	7.594e-07	-+--++-+++++-++-?-+-??+--+++-+-++--+-+++++---+-+++++--+++--++---++--++++++++	79.675	72	0.2504	300211
1	41736000	rs111309254	A	G	0.0052	4.843	1.278e-06	-+--++-+++++-++-?-+-??+--+++-+-++--+-+++++---+-+++++--+++--++---++--++++++++	82.068	72	0.1955	300211
1	41738637	rs4131949	T	C	0.0051	-4.902	9.48e-07	+-++--+-----+--+?+-+??-++---+-+--++-+-----+++-+-+---++---++--+++--++--------	82.034	72	0.1962	300211
1	41742800	rs35813191	T	C	0.0052	4.925	8.436e-07	-+--++-+++++-++-?-+-??+--+++-+-++--+-+++++---+-+++++--+++--++---++--++++++++	81.765	72	0.202	300211
1	41744093	rs35883594	A	G	0.0052	4.97	6.688e-07	-+--++-+++++-++-?-+-??+--+++-+-++--+-+++++---+-+++++--+++--++---++--++++++++	81.317	72	0.2118	300211
1	41745035	rs16828019	T	C	0.0051	-4.989	6.077e-07	+-++--+-----+--+?+-+??-++---+-+--++-+---+-+++-+-----++---++--+++--++--------	82.263	72	0.1914	300211
1	41748642	rs12025684	A	G	0.0055	-4.558	5.161e-06	+--??-+---+-----?+-???-?++?---++-++++---+---+-----?---++-+-??+-++--+---?-+--	63.158	63	0.4707	295158
1	41752465	rs34762587	T	C	0.0081	5.1	3.391e-07	+---++-++-++++++--+++++-++--+----++-+-++-+-+-+++-+++-++++--+---++--++++-++++	92.213	75	0.08631	300486
1	41756826	rs11209802	T	C	0.0085	-4.641	3.467e-06	-++??-+-?+?-----?+???????-++-??++--?-+?-+?????????--????-++-+++--????--?----	47.154	41	0.2354	250826
1	41761080	rs7548367	C	G	0.009	5.262	1.429e-07	+---++-++-++++++--+++-+-++--+----++-+-++-+-+-+++-+++-++++--+---++--++++-++++	97.8	75	0.03973	300486
1	41761220	rs12030183	T	C	0.0081	5.126	2.957e-07	+---++-++-++++++--+++++-++--+----++-+-++-+-+-+++-+++-++++--+---++--++++-++++	92.411	75	0.08411	300486
1	41762156	rs12030420	A	T	0.0084	5.081	3.75e-07	+---++-++-++++++--+++++-++--+----++-+-++-+-+-+++-+++-++++--+---+---++++-++++	93.54	75	0.07244	300486
1	41763018	rs6660666	T	C	0.009	5.154	2.554e-07	+---++-++-++++++--+++-+-++--+----++-+-++-+-+-+++-+++-++++--+---++--++++-++++	97.545	75	0.04125	300486
1	41764463	rs12027245	A	G	0.0083	4.982	6.306e-07	+---++-++-++++++--+-+++-+---++---++-+-++-+-+-+++++++-++++--+-+-+---+-++-++-+	92.702	75	0.08097	300486
1	41768563	rs6600370	A	G	0.0091	5.114	3.157e-07	+---++-++-++++++--+++-+-++--+----++-+-++-+++-+++-+++-++++--+---++--++++-++++	95.107	75	0.05847	300486
1	41770191	rs2364532	T	C	0.0082	5.043	4.573e-07	+---++-++-++++++--+++++-++--+----++-+-++-+-+-+++-+++-++++--+---++--++++-++++	89.874	75	0.1159	300486
1	41770568	rs72665683	A	C	0.0054	-4.65	3.316e-06	--+??-?+---+?+--?-????-?-+?+--+++-+----++-+-++--+-?-+-?-+--??-+-+-?+--+?----	38.662	58	0.9763	293882
1	41772957	rs11209838	T	C	0.0081	-4.964	6.92e-07	-+++--+--+------++-----+--++-++++--+-+--+-+-+---+---+----++-+++--++----+----	89.167	75	0.1262	300486
1	41773004	rs11209839	T	C	0.0081	4.897	9.755e-07	+---++-++-++++++--+++++-++--+----++-+-++-+-+-+++-+++-++++--+---++--++++-++++	89.286	75	0.1244	300486
1	41776623	rs12755632	A	G	0.0087	5.021	5.132e-07	+---++-++-++++++--+++++-++--+----++-+-++-+-+-+++-+++-++++--+---+---++++-++++	88.546	75	0.1358	300486
1	41782194	rs11209858	A	G	0.0129	4.944	7.659e-07	+---++-+--+++-++--+++-+-++--+----++-+-++-+++-+++-+++-+++++-+---+--+++++-++++	90.936	75	0.1016	300486
1	41785414	rs12406967	A	G	0.0126	4.96	7.036e-07	+---++-+--+++-++--+++-+-++--+----++-+-++-+++-+++-++--+++++-+---++-+++++-++++	93.493	75	0.0729	300486
1	41785792	rs2154317	A	G	0.0125	4.962	6.995e-07	+---++-+--+++-++--+++-+-++--+----++-+-++-+++-+++-++--+++++-+---++-+++++-++++	93.98	75	0.06826	300486
1	41789862	rs12725272	A	T	0.0126	-4.928	8.316e-07	-+++--+-++---+--++---+-+--++-++++--+-+--+---+---+--++-----+-+++--+-----+----	93.679	75	0.0711	300486
1	41792567	rs2363812	T	C	0.0126	4.917	8.789e-07	+---++-+--+++-++--+++-+-++--+----++-+-++-+++-+++-++--+++++-+---++-+++++-++++	93.623	75	0.07164	300486
1	41799160	rs4660187	A	G	0.0126	-4.938	7.892e-07	-+++--+-++---+--++---+-+--++-++++--+-+--+---+---+--++-----+-+++--+-----+----	94.49	75	0.06368	300486
1	41799548	rs11209895	T	C	0.0126	4.931	8.169e-07	+---++-+--+++-++--+++-+-++--+----++-+-++-+++-+++-++--+++++-+---++-+++++-++++	94.386	75	0.06459	300486
1	41803803	rs12401846	A	C	0.0128	-4.856	1.2e-06	-+++--+-++---+--++---+-+--++-++++--+-+--+---+---+--++-----+-+++--+-----+----	94.128	75	0.06691	300486
1	41804216	rs2364531	A	C	0.0129	4.879	1.068e-06	+---++-+--+++-++--+++-+-++--+----++-+-++-+++-+++-++--+++++-+---++-+++++-++++	94.554	75	0.06312	300486
1	41807416	rs34805686	A	G	0.003	-4.472	7.739e-06	+--????-+---?-+-?+????-?++?----+--+?+-?-+--?+---+-?-+-?+---??+-++-??---?--+-	59.911	53	0.2394	291559
1	41807694	rs12027080	C	G	0.0128	4.821	1.432e-06	+---++-+--+++-++--+++-+-++--+----++-+-++-+++-+++-++--+++++-+---++-+++++-++++	93.875	75	0.06924	300486
1	41808241	rs12027253	T	C	0.0129	-4.823	1.415e-06	-+++--+-++---+--++---+-+-+++-++++--+-+--+---+---+--++-----+-+++--+-----+----	93.815	75	0.06981	300486
1	41808263	rs12045676	T	G	0.0135	4.847	1.252e-06	+---++-+--+++-++--+++-+-+-+-+----++-+-++-+++-+++-++--+++++-+---++-+++++-++++	93.184	75	0.07597	300486
1	41808270	rs12044881	A	G	0.0135	4.847	1.255e-06	+---++-+--+++-++--+++-+-+-+-+----++-+-++-+++-+++-++--+++++-+---++-+++++-++++	93.178	75	0.07603	300486
1	41810932	rs9661428	T	C	0.015	4.789	1.673e-06	+---++-+--+++-++--+++++-+--++----++-+-++-+---+++-+---+++++-+---++-+++++-++++	93.022	75	0.07762	300486
1	41811249	rs7540857	T	C	0.0142	4.819	1.445e-06	+---++-+--+++-++--+++++-+---+----++-+-++-+---+++-+-+-+++++-+---+--+++++-++++	90.399	75	0.1086	300486
1	41812083	rs11209926	T	C	0.0142	-4.853	1.214e-06	-+++--+-++---+--++-----+-++--+-++--+-+--+-+++---+-+-+-----+-+++--+-----+----	89.83	75	0.1165	300486
1	41812194	rs4609415	A	C	0.0142	4.83	1.366e-06	+---++-+--+++-++--+++++-+---+-+--++-+-++-+---+++-+-+-+++++-+---+--+++++-++++	90.621	75	0.1057	300486
1	41814348	rs4660525	T	C	0.0143	-4.813	1.485e-06	-+++--+-++---+--++-----+-+++-++++--+-+--+-+++---+-?-+-----+-+++-++-----+----	89.26	74	0.1091	300049
1	41814928	rs10789335	A	C	0.0142	4.834	1.337e-06	+---++-+--+++-++--+++++-+---+----++-+-++-+---+++-+?+-+++++-+---+--++++--++++	89.98	74	0.0997	300049
1	41817502	rs4660190	T	C	0.0144	4.846	1.26e-06	+---++-+--+++-++--+++++-+---+----++-+-++-+---+++-+?+-+++++-+---+--+++++-++++	88.355	74	0.122	300049
1	41819243	rs7549375	C	G	0.0145	-4.857	1.189e-06	-+++--+-++---+--++-----+-+++-++++--+-+--+-+++---+-?-+-----+-+++-++-----+----	88.557	74	0.119	300049
1	41837173	rs56233836	T	C	0.0055	-5.273	1.339e-07	---+--+--------+?--+-?-++-?-+-+++---+---+-++++--+-+-+----++-+++++------+----	56.996	72	0.902	297748
1	41843440	rs11209970	A	G	0.0137	4.588	4.479e-06	-+-+++-++--++++--++++-+--++--+-++-+-++++++---+++---++++-+--++--++-++++++++++	69.735	75	0.6501	300486
1	41843617	rs59830893	A	C	0.0134	-4.558	5.159e-06	+-+---+--++----++----+-++--++-+--+-+----+-++---+++++---+-++--++--+----+-----	68.489	75	0.689	300486
1	41844293	rs11209971	A	G	0.0135	-4.63	3.66e-06	+-+---+--++----++----+-++--++-+--+-+------+++---+++----+-++--++--+----------	69.899	75	0.6449	300486
1	41845115	rs56053787	A	C	0.009	4.468	7.907e-06	++++++-++-++-++--++++-----+--+-++-+--+++-+----++-----++++-++--+-+++-++++++++	58.931	75	0.9137	300486
1	41845541	rs55784313	A	G	0.0054	-5.235	1.653e-07	--++--+--------+?--+-+-++-?-+-+++---+---+-++++--+-+----+-++-+++-+------+----	54.915	73	0.9436	297840
1	43929988	rs2782657	C	G	0.0082	4.724	2.311e-06	++--++++-++--+-+-+---++++++++-+-+++--+-+-+++-+----++-++++++-++--+---+-++++-+	98.463	75	0.03599	300486
1	43930738	rs2842198	A	G	0.0084	4.683	2.821e-06	++--++++-++--+-+-+---++++++++-+-+++--+-+-+++-+----++-++++++-++--+---+-++++-+	98.064	75	0.0382	300486
1	43933689	rs2105029	T	C	0.0083	-4.763	1.906e-06	--+--------++-+-+-+++--------+-+---++---+--++-+-+++--------+--++-+++-+---+--	101.759	75	0.02161	300486
1	43938801	rs7413861	A	C	0.0088	4.743	2.101e-06	++--+++++++--+-+-+---++++++++-+-+++--+++-++--+-+--++--+++++--+--+---+-+++-++	107.495	75	0.008252	300486
1	43941352	rs2105028	T	C	0.0087	4.782	1.733e-06	++-++++++++--+-+-+---++++++++-+-+++--+++-++--+-+--++--+++++--+--+---+-+++-++	107.632	75	0.008056	300486
1	43941927	rs4660733	T	C	0.0093	-4.816	1.467e-06	--++-------++-+-+-+++--------+-+---++---+--++-+-+++-++-----++-++-+++-+---+--	109.265	75	0.00602	300486
1	43948774	rs10789433	A	G	0.0124	-5.191	2.097e-07	--+--------++-+-+-+++--------+-+---+----+--++-+-+++--------++-++-+++-+---+--	108.795	75	0.006551	300486
1	43949095	rs10732843	A	G	0.008	5.19	2.107e-07	++-++++++++--+-+-+---++++++++-+-+++--+++-++--+-+---++++++++--+--+---+-+++-++	110.658	75	0.004669	300486
1	43949235	rs11210850	A	G	0.0111	-5.114	3.157e-07	--+--------++-+-+-+++--------+-+---++---+--++-+-++---------++-++-+++-+---+--	108.13	75	0.007376	300486
1	43949718	rs2992038	T	C	0.0101	5.238	1.622e-07	++-++++++++--+-+-+---+++++-++-+-+++-++++-++--+-+--+++-+++++--+--+---+-+++-++	105.965	75	0.01076	300486
1	43949810	rs2992037	A	G	0.0101	5.281	1.285e-07	++-++++++++++--+-+---++++++++-+-+++-++-+-++--+-+---++-+++++-++--+---+-+-++++	98.431	75	0.03617	300486
1	44010571	rs6695915	A	G	0.0099	-5.037	4.741e-07	-+-??-+??-----?+??-???--++-?-+------+---++++--++++-++--+---?--++?-++-++?----	61.007	61	0.4757	277733
1	44012923	rs1889588	T	C	0.011	-4.706	2.531e-06	------+----+++-++-+++-++-+++----+--++----+--+-++++--+------++++--+++-+---+--	90.712	75	0.1045	300486
1	44022303	rs2494995	A	C	0.0122	4.45	8.595e-06	+++--+-++++---+--+------+---+--++++--+++++++-+----+--++-+-+----++---+-+++-++	94.797	75	0.06104	300486
1	44023615	rs2842175	A	G	0.0116	-4.426	9.587e-06	---++-+----+++-++-++++++-+++-++----++-------+-+-++-++--+-+-++++--+++-+---+--	92.966	75	0.0782	300486
1	44026053	rs10789435	T	G	0.0119	-4.456	8.348e-06	---++-+----+++-++-++++++-+++-++----++-------+-+-++-++--+---++++--+++-+---+--	92.413	75	0.08409	300486
1	44026089	rs3000761	T	C	0.012	-4.451	8.552e-06	---++-+----+++-++-++++++-+++-++----++-------+-+-++-++--+-+-++++--+++-+---+--	91.947	75	0.08932	300486
1	44026180	rs68191270	A	C	0.0119	-4.446	8.767e-06	---++-+----+++-++-++++++-+++-++----++-------+-+-++-++--+-+-++++--+++-+---+--	92.664	75	0.08138	300486
1	44026656	rs12076635	C	G	0.0125	4.487	7.213e-06	+++--+-++++---+--+------+---+--++++--+++++++-+-+--+--++-+-+----++---+-+++-++	94.181	75	0.06642	300486
1	44031493	rs10890255	A	G	0.0113	-4.465	8.018e-06	---++-+----+++--+-++-+++-+++--+----+-----+--+-+-++-++----+-++++--+++-+---+--	87.443	75	0.1542	300486
1	44041744	rs45605334	T	C	0.0061	4.79	1.671e-06	+-+??+-?-++++++-??+???+?+-+?--+++++--+++-+--++---+--+---+-+?+-+-----+--?++++	77.485	63	0.1036	289638
1	44054994	rs58097944	A	G	0.0094	4.522	6.138e-06	+-++++-++++---++-+---+-++++-+--+-++--+-+--+--+----++-++++---+--++--++---+-++	89.043	75	0.1281	300486
1	44078384	rs499257	T	C	0.0118	-5.278	1.305e-07	---++-+----+++-+--+++--+-++-+++-----+----++-+++----++--+----++-+-+++-+---+--	81.263	75	0.2905	300486
1	44079411	rs603542	T	C	0.0117	-5.295	1.193e-07	---++-+----+++-+--+++--+-++-+++-----+----++-+++----++--+----++-+-+++-+---+--	81.604	75	0.2816	300486
1	44083015	rs653953	A	G	0.0096	5.197	2.03e-07	+++--+-++++---+-++---++-+--+---+++++-++++--+---++++--++-++++--+-+---+-+++-++	81.785	75	0.2769	300486
1	44086831	rs1143702	T	C	0.0202	5.055	4.295e-07	+++--+-++++---+-++---++-+--+---+++++-+++---+---++++--++-+++---+-+---+-+++-++	80.292	75	0.3169	300486
1	44097530	rs2970610	T	C	0.0118	-5.184	2.171e-07	---++-+----+++-+--+++--+-++-+++-----+----++-+++----++--+---+++-+-+++-+---+--	83.39	75	0.2373	300486
1	44100084	rs11210892	A	G	0.0124	5.121	3.042e-07	+++--+-++++---+-++---++-+--+---+++++-++++--+---++++--++-+++-----+---+-+++-++	85.8	75	0.185	300486
1	44107428	rs2367724	T	C	0.0144	4.851	1.227e-06	+++--++++++---+-++---++-+--+---+++++-++++--+---++++--++-+++-----+---+-+++-++	83.595	75	0.2325	300486
1	44109749	rs607296	A	G	0.0109	-4.965	6.873e-07	---??-+-?-?+++-+?-???????++-+??----?+-?--?????????-+????---+++++-????+-?-+--	42.879	41	0.3906	250826
1	44118644	rs112476957	T	C	0.0063	4.879	1.066e-06	+-+??+++-++++++-?++???+?--+++-++++++++---+--++---+?-+-+-+++-+++-++--+--?++++	79.475	66	0.1233	299114
1	44124514	rs56072551	T	G	0.0055	4.828	1.381e-06	+-+??+++-++++++-?++???+---+++-++++++++---+--++---+?-+-+-+++-+++-++--+--?++++	77.975	67	0.1691	299261
1	44148617	rs4660740	A	G	0.0114	-5.284	1.267e-07	-----------+++--+-++------+-+-++---++-+-++-++++-++?-0-+--+-+-++--++----+---+	91.14	74	0.08587	300049
1	44151911	rs113688544	T	C	0.0117	5.32	1.039e-07	+++++++++++---++-+--++++++-+-+--+++--+-+--+----+--?+++-++-+-+--++--++++-+++-	93.812	74	0.05984	300049
1	44171211	rs56319043	T	C	0.0121	5.399	6.708e-08	+++++++++++---++-+--++-+++-+-+--+++--+-+--+----+--?+-+-++---+--++--++++-+++-	94.861	74	0.0516	300049
1	44174793	rs304300	T	G	0.0114	-4.71	2.481e-06	----+--+---+++-+?-+++?-+------+-+---+-+--+--+-+---?-+----+-??++++++++++--+--	77.474	70	0.2526	298487
1	44181103	rs116583447	T	C	0.0046	4.439	9.037e-06	++-??+???++-?+????????-?+-??+-+-++++?-?++-+--+-++-?++-?++-+??+-++??++++?++++	61.176	49	0.1138	270863
1	44205094	rs10749850	T	C	0.0119	-4.447	8.706e-06	---++-+----+++-+--+++--++-+++++-----+-+-----+-+++--++--+-+-+-++--+++-+---+--	73.095	75	0.5407	300486
1	44220747	rs61768408	A	G	0.0107	5.448	5.092e-08	+++++++++++---++-+--++++++-+----++++-+-+--+----+--++-+-++---+--++--++++-+++-	96.179	75	0.05027	300486
1	44224688	rs72678674	A	G	0.011	5.394	6.899e-08	+++++++++++---++-+--++++++-+----+++--+-+--+----+--++-+-++---+--++-+++++-+++-	99.304	75	0.0317	300486
1	44240221	rs72678680	A	G	0.0111	5.21	1.886e-07	++-++++++++---++-+--++++++-+-+--++++-+-+--+----+--?+-+-++---+--++--++++-+++-	92.572	74	0.07096	300049
1	44243049	rs11587427	T	C	0.0112	-5.263	1.421e-07	-----------+++--+-++------+-+-++----+-+-++-++++-++?-+-+--+++-++--++----+---+	93.556	74	0.06201	300049
1	44246356	rs6680338	A	G	0.0108	5.188	2.127e-07	++-+-++-+++---+-?+-???+-++++-+-+-+++-+-++-++-+-+-+?++++++-+-+--+-------++-++	73.326	70	0.3696	299679
1	44249344	rs12760274	A	G	0.0119	-4.48	7.464e-06	--+--------+++--+-+++-----+-+-++---++++-++-++++-++?-+-+----+--++-++----+---+	96.883	74	0.0384	300049
1	44256682	rs1354261	A	C	0.0114	-5.384	7.293e-08	-++-+--+----++-+?-+?+?++----+-+-+---+-+--+--+-++++?------+-+-++++++++++-----	72.239	71	0.4367	299782
1	44258040	rs1502907	A	G	0.0107	-5.432	5.565e-08	-++-+--+----++-+?-+???++----+-+-+---+-+--+--+-+-+-?------+-+-++++++++++-----	67.678	70	0.5564	299679
1	44265655	rs3791055	T	C	0.0106	-5.437	5.41e-08	-++-+--+----++-+?-+???++----+-+-+---+-+--+--+-+-+-?------+-+-++++++++++-----	67.143	70	0.5747	299679
1	44268219	rs11210928	T	C	0.0109	5.43	5.65e-08	+-++-++-++++--+-?+-?-?--++++++-+-+++-+-++-++-+-+--?++++++-+-+----------+++++	71.454	71	0.4626	299782
1	44269208	rs6670344	A	G	0.0105	-5.425	5.786e-08	-++-+--+----++-+?-+???++----+-+-+---+-+--+--+-+-+-?------+-+-++++++++++-----	67.712	70	0.5553	299679
1	44275595	rs246775	T	C	0.0258	-5.273	1.342e-07	--+-+--+----++-+?-+-+?++--?---+-+---+-+--+--+-++++?+-----+-+-++++++++++--+--	82.19	71	0.1713	297311
1	44278722	rs37469	A	G	0.0097	5.406	6.456e-08	+--++++++++-+-++-+-+-+-+++++-+---+++-+-++-++---+---+++-++++-+++---+-++--++++	68.878	75	0.677	300486
1	44284348	rs37463	A	G	0.0104	5.435	5.475e-08	+--++++++++-+-++-+-+-+++++++-++--+++---++-++---+---+++-++++-+++---++++--++++	69.714	75	0.6508	300486
1	44284859	rs37461	T	C	0.0099	5.029	4.92e-07	+--??+++?+?-+??+?+????????++-??-+++?--?++?????????-+????+++-+++--?????-?++++	29.834	37	0.7924	246054
1	44286932	rs3791067	C	G	0.0107	5.41	6.291e-08	+--++++++++-+-++-+-+-+++++++-+---+++---++-++---+---+++-++++-+++---++++--++++	68.801	75	0.6794	300486
1	44288364	rs37460	C	G	0.0111	-5.429	5.671e-08	-++--------+-+--+-+-+-------+-+++---+++--+--+++-+++---+----+---+++----++----	68.522	75	0.688	300486
1	44377503	rs4314918	A	G	0.0111	5.118	3.09e-07	+-+-++++++++--+-?-----+-++++-+-+-+++-+-++-++++----+-+++++-+++-+-+---+--++-++	83.946	74	0.2011	300406
1	44379957	rs6674176	A	G	0.0112	5.099	3.416e-07	+-+-++++++++--+-?-----+-+-++-+-+-+++-+-++-++++----+-+++++-+++-+-+---+--++-++	83.525	74	0.2101	300406
1	44405563	rs11210937	T	C	0.0106	-5.084	3.698e-07	-+-+--------++-+?+++++-+-++-+-+-----+-+--+--+-++++-+-----+---+-+-+++-++--+--	89.219	74	0.1097	300406
1	44433864	rs7412307	C	G	0.0108	-4.936	7.983e-07	-+-+--------++-+++++++-+-++-+-+-----+-+--+--+-++++-+-----+---+-+-+++-++--+--	94.025	75	0.06785	300486
1	44440146	rs4660761	A	G	0.0108	4.927	8.346e-07	+-+-++++++++--+-?-----+-+--+-+-+++++-+-++-++-+----+-+++++-+++-+-+---+--++-++	97.033	74	0.03755	300406
1	44442521	rs12410334	A	C	0.0107	-4.934	8.039e-07	-+-+--------++-+?+++++-+-++-+-+-----+-+--+--+-++++-+-----+---+-+-+++-++--+--	99.003	74	0.02779	300406
1	44455203	rs2993619	T	C	0.0098	-5.387	7.166e-08	--+-?--+----+--+?-+-??-+----+-+-++--+-+--+--+-+-+-?------+-+-+---++++++--+--	72.58	70	0.393	299668
1	45797505	rs3219489	C	G	0.0096	-4.704	2.553e-06	--+++++---+----++--+------?+------++++++-++-----+++---+--+-+---++---++----+-	76.087	74	0.4111	297920
1	45802670	rs3219476	A	C	0.0177	4.536	5.733e-06	-++-+--++++++-+--++-+++++-+-++++-++-----+0-++++-----+---+---++---+++--++++-+	81.329	75	0.2888	300486
1	45804050	rs3219472	T	C	0.0101	4.6	4.225e-06	++----++++-++++--++-++++++?-++++-+------+--++++----+++-++-+-+++--+++--++++-+	76.787	74	0.3894	297920
1	45806432	rs3219463	T	C	0.014	4.497	6.877e-06	++--+-++++-++++--++-++++++--++++++------+--++++----+++-++-+-+++--+++--++++-+	76.462	75	0.4313	300486
1	45810091	rs9429072	A	G	0.0132	-4.629	3.666e-06	--++++----+----++--+------++----+-++++++-++----++++---+--+-+---++---++----+-	74.893	75	0.4818	300486
1	45813034	rs9429073	T	C	0.0139	4.566	4.978e-06	++----++++-++++--++-+++++++-++++++------+--++++----+++-++-+-+++--+++--++++-+	75.955	75	0.4475	300486
1	45813441	rs2298018	T	C	0.0132	-4.615	3.933e-06	--++++----+----++--+------++------++++++-++----++++---+--+-+---++---++----+-	75.184	75	0.4723	300486
1	45813820	rs2153607	A	G	0.0132	4.622	3.796e-06	++----++++-++++--++-++++++--++++++------+--++++----+++-++-+-+++--+++--++++-+	75.131	75	0.474	300486
1	45813941	rs2153608	A	G	0.0131	-4.638	3.514e-06	--++++----+----++--+------++------++++++-++----++++---+--+-+---++---++----+-	74.57	75	0.4923	300486
1	45814058	rs2153609	A	G	0.0146	-4.571	4.851e-06	--++++----+----++-++-------+------++++++-++----++++---+--+-+---++---++----+-	75.582	75	0.4595	300486
1	45814103	rs2185549	T	C	0.0099	-4.639	3.494e-06	--++++----+----++--+------?+------++++++-++----++++---+--+-+---++---++----+-	74.468	74	0.4629	297920
1	45815580	rs9429074	A	G	0.0138	-4.623	3.777e-06	--++++----+----++--+------++------++++++-++----++++---+--+-+---++---++----+-	74.806	75	0.4846	300486
1	45818421	rs9429075	A	G	0.0103	4.677	2.917e-06	++----++++-++++--++-++++++?-++++-+------+--++++----+++-++-+-+++--+++--++++-+	72.408	74	0.5306	297920
1	45819069	rs7544178	T	C	0.01	4.625	3.754e-06	++----++++-++++--++-++++++?-++++-+------+--+++++---+++-++-+-+++--+++--++++-+	75.088	74	0.4428	297920
1	45819489	rs9429076	T	C	0.0146	-4.681	2.85e-06	--++++----+----++--+------++----+-++++++-++------++---+--+-+---++---++----+-	74.278	75	0.5018	300486
1	45819872	rs4660849	A	G	0.0101	4.657	3.202e-06	++----++++-++++--++-++++++?-++++-+------+--+++++---+++-++-+-+++--+++--++++-+	74.23	74	0.4706	297920
1	45820149	rs4660301	A	T	0.0099	4.685	2.796e-06	++----++++-++++--++-++++++?-++++++------+--++++----+++-++-+-+++--+++--++++-+	74.2	74	0.4716	297920
1	45821393	rs9429158	A	G	0.0145	-4.643	3.426e-06	--++++----+----++--+------++----+-++++++-++-----+++---+--+-+---++---++----+-	73.749	75	0.5192	300486
1	45823484	rs9429159	A	C	0.01	4.667	3.059e-06	++----++++-++++--++-++++++?-++++-+------+--+++++---+++-++-+-+++--+++--++++-+	72.363	74	0.5321	297920
1	45827968	rs9429160	T	G	0.0101	4.66	3.168e-06	++----++++-++++--++-++++++?-++++-+------+--++++----+++-++-+-+++--+++--++++-+	73.831	74	0.4837	297920
1	45828943	rs9326141	A	G	0.01	4.575	4.763e-06	++--+-++++-++++--+--++++++?-++++++------+--+++++---+++-++-+-+++--+++--++++-+	75.059	74	0.4438	297920
1	45830824	rs2050884	A	G	0.0148	-4.535	5.752e-06	--++++----+----++-++------++----+-++++++-++------++---+--+-+---++---++----+-	73.913	75	0.5138	300486
1	45831915	rs7417107	C	G	0.0149	4.545	5.506e-06	++----++++-++++--+--++++++--++++-+------+--++++-+--+++-++-+-+++--+++--++++-+	74.411	75	0.4975	300486
1	45834773	rs4520450	A	G	0.0095	-4.665	3.09e-06	--++++----+----++--+------?+----+-++++++-++----++++---+--+-+---++---++----+-	72.647	74	0.5227	297920
1	45835041	rs9429161	T	C	0.015	-4.545	5.484e-06	--++++----+----++--+------++----+-++++++-++-----+++---+--+-+---++---++----+-	73.668	75	0.5219	300486
1	45839643	rs7543428	A	G	0.0095	-4.676	2.919e-06	--++++----+----++--+------?+----+-++++++-++----++++---+--+-+---++---++----+-	73.395	74	0.498	297920
1	45843086	rs7553318	A	G	0.0101	-4.593	4.362e-06	--++++----+----++-++------?+----+-++++++-++----++++---+--+-+---++---++----+-	74.354	74	0.4666	297920
1	45843151	rs61791362	T	C	0.0145	-4.438	9.065e-06	--++++----+----++-++------++------++-+++-++-----+++---+--+-+--+++---++----+-	76.861	75	0.4188	300486
1	45843810	rs4660851	A	T	0.0154	-4.531	5.876e-06	--++++----+----++--+------++----+-++++++-++-----+++---+--+-+---++---++----+-	75.237	75	0.4706	300486
1	45847981	rs884962	A	G	0.0101	4.617	3.892e-06	++----++++-++++--+--++++++?-++++-+------+--++++----+++-++-+-+++--+++--++++-+	74.308	74	0.4681	297920
1	45848931	rs4660852	T	G	0.0101	4.653	3.275e-06	++----++++-++++--+--++++++?-++++-++-----+--+++++---+++-++-+-+++--+++--++++-+	74.34	74	0.467	297920
1	45849090	rs4660853	T	C	0.0096	4.702	2.578e-06	++----++++-++++--++-++++++?-++++-+------+--++++++--+++-++-+-+++--+++--++++-+	73.533	74	0.4935	297920
1	45849311	rs11211101	C	G	0.0101	4.59	4.44e-06	++----++++-++++--+--++++++?-++++-+------+--++++----+++-++-+-+++--+++--++++-+	74.582	74	0.4592	297920
1	45849792	rs2492840	A	C	0.0153	4.537	5.696e-06	++----++++-++++--+--++++++--++++-+------+--+++++---+++-++-+-+++--+++--++++-+	75.007	75	0.4781	300486
1	45850590	rs1417578	A	G	0.0151	-4.532	5.834e-06	--++++----+----++-++------++----+-++++++-++----+-++---+--+-+---++---++----+-	74.961	75	0.4796	300486
1	45852564	rs12065863	T	C	0.0114	-4.619	3.858e-06	--++++----+----++--+------?+----+-++-+++-++------++---+--+-+--+++---++----+-	73.043	74	0.5096	297920
1	45853539	rs12037411	T	C	0.0189	4.542	5.577e-06	++----++++-++++--+--++++++--++++-+------+--++++----+++-++-+-+++--+++--++++-+	75.425	75	0.4645	300486
1	45854087	rs4660854	A	T	0.0168	-4.535	5.749e-06	--++++----+----++--+------++----+-++++++-++----+-++---+--+-+--+++---++----+-	73.962	75	0.5122	300486
1	45857176	rs2487442	C	G	0.0169	-4.613	3.963e-06	--++++----+----++-++--+---++----+-++++++-++------++---+--+-+--+++---++----+-	72.736	75	0.5526	300486
1	45859332	rs7536135	A	G	0.0191	4.653	3.276e-06	++----++++-++++--++-++++++--++++-+--+---+--++++-+--+++-++-+-++---+++--++++-+	75.264	75	0.4697	300486
1	45859343	rs7525849	A	G	0.0185	-4.607	4.09e-06	--++++----+----++--+------++----+-++-+++-+++---+-++---+--+-+--+++---++----+-	74.311	75	0.5008	300486
1	45864695	rs7532762	A	C	0.0178	4.567	4.949e-06	++----++++-++++--++-++-+++--++++++------+--++++-+--+++-++-+-+++--+++--++++-+	76.009	75	0.4458	300486
1	45864761	rs17395553	T	C	0.019	4.471	7.78e-06	++----++++-++++--+--++++++--++++-+------+--++++----+++-++-+-++---+++--++++-+	74.437	75	0.4966	300486
1	45867944	rs61791368	T	C	0.019	-4.491	7.092e-06	--+++++---+----++-++------++----+-++++++-++-----+++---+--+-+--+-+---++----+-	73.912	75	0.5139	300486
1	45870279	rs61791369	A	G	0.0169	4.544	5.52e-06	++-----+++-++++--+--++++++--++++++------+--++++----+++-++-+-++---+++--++++-+	73.526	75	0.5266	300486
1	45872662	rs781226	T	C	0.016	4.592	4.383e-06	++-----+++-++++--+--++++++--++++++------+--++++++--+++-++-+-+++--+++--++++-+	74.791	75	0.4851	300486
1	45876999	rs1494812	T	C	0.017	4.552	5.31e-06	++-----+++-++++--+--++++++--++++++------+--+++++---+++-++-+-++---+++--++++-+	73.585	75	0.5246	300486
1	45877575	rs2088100	T	C	0.0168	4.563	5.037e-06	++-----+++-++++--+--++++++--++++++------+--+++++---+++-++-+-++---+++--++++-+	73.458	75	0.5288	300486
1	45879088	rs6657284	T	C	0.0154	-4.537	5.702e-06	--+++++---+----++--+-------+----+-++-+++-++----++++---+--+-+--+++---++----+-	73.438	75	0.5294	300486
1	45880669	rs12097497	T	C	0.0156	4.521	6.146e-06	++-----+++-++++--++-++++++--++++++------+--+++++---+++-++-+-++---+++--++++-+	73.257	75	0.5354	300486
1	45880751	rs781230	T	C	0.0142	-4.578	4.694e-06	--+++++---+----++--+------++----+-++++++-++----+-++---+--+-+---++--+++----+-	74.307	75	0.5009	300486
1	45881262	rs1826691	A	G	0.0152	4.53	5.905e-06	++-----+++-++++--++-+++++++-++++++------+--+++++---+++-++-+-++---+++--++++-+	73.227	75	0.5364	300486
1	45883565	rs1771550	T	C	0.0137	-4.571	4.845e-06	--+++++---+----++--+------++----+-++++++-++----+-++---+--+-+---++--+++----+-	74.61	75	0.491	300486
1	45883643	rs1771551	C	G	0.0141	4.579	4.664e-06	++-----+++-++++--++-++++++--++++-+------+--++++-+--+++-++-+-+++--++---++++-+	73.938	75	0.513	300486
1	45887288	rs3790582	T	C	0.0142	-4.558	5.176e-06	--+++++---+----++--+-------+----+-++++++-++-----+++---+--+-+--+++---++----+-	73.468	75	0.5285	300486
1	45890183	rs7531253	T	C	0.0143	-4.554	5.265e-06	--+++++---+----++--+-------+------++++++-++-----+++---+--+-+--+++---++----+-	72.808	75	0.5502	300486
1	45890399	rs781232	T	C	0.0136	-4.605	4.122e-06	--+++++---+----++--+-------+----+-++++++-++----+-++---+--+-+---++--+++----+-	74.01	75	0.5106	300486
1	45891152	rs11211108	T	C	0.0143	4.555	5.235e-06	++-----+++-++++--++-+++++++-++++++------+--+++++---+++-++-+-++---+++--++++-+	72.659	75	0.5551	300486
1	45891458	rs10890327	T	C	0.0142	4.565	5.005e-06	++-----+++-++++--++-+++++++-++++++------+--+++++---+++-++-+-++---+++--++++-+	72.433	75	0.5625	300486
1	45891543	rs12046816	T	G	0.0135	4.573	4.806e-06	++-----+++-++++--++-+++++++-++++++------+--+++++---+++-++-+-++---+++--++++-+	72.89	75	0.5475	300486
1	45891758	rs1084166	A	G	0.0125	-4.537	5.719e-06	--+++++---+----++--+-------+----+-+++++++++----+-++---+--+-+--+++--+++----+-	73.62	75	0.5235	300486
1	45899114	rs61788261	A	G	0.014	4.531	5.881e-06	++-----+++-++++--++-+++++++-++++-+------+--+++++---+++-++-+-++---+++--++++-+	72.312	75	0.5665	300486
1	45899795	rs4660855	A	G	0.0139	-4.54	5.63e-06	--+++++---+----++--+-------+----+-++++++-++-----+++---+--+-+--+++---++----+-	72.201	75	0.5702	300486
1	45902048	rs12410493	A	G	0.0134	4.533	5.829e-06	++-----+++-++++--++-+++++++-++++-+------+--++++----+++-++-+-++---+++--++++-+	71.045	75	0.608	300486
1	45902219	rs61788262	T	G	0.0136	-4.547	5.438e-06	--+++++---+----++--+-------+----+-++++++-++----++++---+--+-+--+++---++----+-	73.242	75	0.5359	300486
1	45907180	rs61788281	A	G	0.013	-4.573	4.798e-06	--+++++---+----++--+-------+----+-++++++-++------+----+--+-+--+++---++----+-	69.388	75	0.661	300486
1	45908782	rs11211111	T	C	0.0128	4.559	5.147e-06	++-----+++-++++--++-+++++++-++++-+------+--+++++--++++-++-+-++---+++--++++-+	70.944	75	0.6113	300486
1	45909994	rs1006216	A	G	0.0128	-4.58	4.639e-06	--+++++---+----++--+-------+----+-++++++-++----+++----+--+-+--+++---++----+-	70.374	75	0.6297	300486
1	45912005	rs1007858	T	C	0.0126	4.579	4.676e-06	++-----+++-++++--++-+++++++-++++-+------+--+++++--++++-++-+-++---+++--++++-+	70.431	75	0.6278	300486
1	45913860	rs7528573	T	C	0.0128	-4.589	4.455e-06	--+++++---+----++--+-------+----+-++++++-++-----++----+--+-+--+++---++----+-	70.495	75	0.6258	300486
1	45916061	rs55642258	A	G	0.0118	4.876	1.082e-06	++-----+++-++++--++-+++++++-+-++-++-+---+--+++++--++-+-++-+-++---++-+-++++-+	73.305	75	0.5338	300486
1	45919234	rs61788285	A	C	0.0118	-4.876	1.082e-06	--+++++---+----++--+-------+-+--+--+-+++-++-----++--+-+--+-+--+++--+-+----+-	73.534	75	0.5263	300486
1	45920406	rs10890330	A	G	0.0119	4.897	9.712e-07	++-----+++-++++--++-+++++++-+-++-++-+---+--++++---++-+-++-+-++---++-+-++++-+	73.337	75	0.5328	300486
1	45926495	rs2055145	C	G	0.0119	-4.926	8.402e-07	--+++++---+----++--+-------+-+--+--+-+++-++----+++--+-+--+-+--+++----+----+-	73.345	75	0.5325	300486
1	45927517	rs12067642	T	G	0.0127	4.826	1.391e-06	++-----+++-++++--++-+++++++-+-++-++-+---+--+++++--++-+-++-+-++---++++-++++-+	72.838	75	0.5492	300486
1	45930246	rs11211117	T	C	0.0119	4.639	3.494e-06	++-----+++-++++--++-+++++++-+++++++-----+--++++---++++-++-+-++---+++--++++-+	69.467	75	0.6586	300486
1	45930270	rs11211118	A	C	0.012	-4.634	3.589e-06	--+++++---+----++--+-------+-------+++++-++----+++----+--+-+--+++---++----+-	69.617	75	0.6538	300486
1	45936351	rs4660858	A	G	0.012	4.661	3.142e-06	++----++++-++++--++-+++++++-+++++++-----+--++++---++++-++-+-++---+++--++++-+	69.454	75	0.659	300486
1	45937695	rs28555082	A	G	0.0126	4.598	4.273e-06	++----++++-++++--++-+++++++-+++++++-----+--+++++--++++-++-+-++---+++--++++-+	68.843	75	0.6781	300486
1	45941349	rs12037201	T	G	0.0117	4.773	1.813e-06	++----++++-++++--+--+++++++-+++++++-----+--++++---++++-++-+-++---+++--++++-+	68.491	75	0.6889	300486
1	45955868	rs4660863	T	C	0.0123	-4.95	7.437e-07	--++++----+-----+-+--------+++-----+-+++-++----+-+--+-+--+-+---+-----+----+-	69.105	75	0.6699	300486
1	45956828	rs3790583	C	G	0.0123	-4.94	7.806e-07	--++++----+-----+-+--------+++-----+-+++-++----+-+--+-+--+-+---+-----+----+-	68.78	75	0.68	300486
1	45957609	rs11211123	A	G	0.0123	4.942	7.748e-07	++----++++-+++++-+-++++++++---+++++-+---+--++++-+-++-+-++-+-+++-+++++-++++-+	69.023	75	0.6725	300486
1	45959102	rs10789464	T	C	0.0123	4.928	8.325e-07	++----++++-+++++-+-++++++++---+++++-+---+--++++-+-++-+-++-+-+++-+++++-++++-+	68.854	75	0.6777	300486
1	45962409	rs11211124	T	C	0.0122	-4.932	8.138e-07	--++++----+-----+-+--------+++-----+-+++-++----+-+--+-+--+-+---+-----+----+-	68.892	75	0.6766	300486
1	45966298	rs12042903	A	G	0.0122	-4.953	7.289e-07	--++++----+-----+-+--------+++-----+-+++-++----+-+--+-+--+-+---+-----+------	69.207	75	0.6668	300486
1	45970446	rs12029322	T	C	0.0121	4.913	8.982e-07	++----++++-+++++-+-++++++++---+++++-+---+--++++-+-++-+-++-+-+++-+++++-++++-+	69.221	75	0.6663	300486
1	45975166	rs9729395	A	G	0.0122	-4.907	9.249e-07	--++++----+-----+-+--------+++-----+-+++-++----+-+--+-+--+-+---+-----+------	69.428	75	0.6598	300486
1	45977803	rs67683090	T	G	0.0121	-4.922	8.545e-07	--++++----+-----+-+--------+++-----+-+++-++----+-+--+-+--+-+---+-----+------	69.867	75	0.6459	300486
1	45977860	rs61788336	T	C	0.0122	4.896	9.76e-07	++----++++-+++++-+-++++++++---+++++-+---+--++++-+-++-+-++-+-+++-+++++-++++++	69.685	75	0.6517	300486
1	45982485	rs11211128	A	G	0.0129	4.827	1.386e-06	++----++++-+++++-+-++++++++---+++++-+---+--++++-+-++-+-++-+-+++-+++++-++++-+	67.528	75	0.7179	300486
1	45985157	rs4633317	T	C	0.0122	-4.899	9.652e-07	--++++----+-----+-+--------+++-----+-+++-++----+-+--+-+--+-+---+-----+----+-	68.797	75	0.6795	300486
1	45986269	rs5015340	A	G	0.0122	4.899	9.617e-07	++----++++-+++++-+-++++++++---+++++-+---+--++++-+-++-+-++-+-+++-+++++-++++-+	68.668	75	0.6835	300486
1	45988267	rs713358	C	G	0.0122	-4.886	1.028e-06	--++++----+-----+-+--------+++-----+-+++-++----+-+--+-+--+-+---+-----+----+-	69.395	75	0.6608	300486
1	45998579	rs9727262	T	G	0.0119	-4.654	3.252e-06	--++++----+-----+-+--------+++-----+-+++-++------+--+-+--+-+---+-----+----+-	69.703	75	0.6511	300486
1	46006675	rs61788356	T	C	0.0107	4.543	5.536e-06	++----++++-+++++-+-+++++++?---+++++-+---+--++++++-++-+-++-+-++--+++++-++++-+	71.843	74	0.5494	297920
1	46009818	rs868351	T	G	0.0102	4.59	4.429e-06	++----++++-+++++-+-+++++++?---+++++-+---+--++++++-++-+-++-+-++--+++++-++++-+	71.894	74	0.5477	297920
1	51273992	rs572377290	T	C	0.0001	-4.647	3.373e-06	?????????????????????????????????-??????????????????????????????????????-??-	5.579	2	0.06145	172739
1	52438062	rs77090393	T	C	0.0039	4.866	1.138e-06	+-+??---?+-+-++-?-????+?+-?-++-++++-++--+++-+++--+++-+++++-+?+-++-?-+++?++++	63.815	62	0.4125	287248
1	52441073	rs74550598	T	G	0.0039	4.878	1.073e-06	+-+??---?+-+-++-?-????+?+-?-++-++++-++--+++-+++--+++-+++++-+?+-++-?-+++?++++	64.427	62	0.3917	287248
1	52444583	rs78014763	T	C	0.0039	-4.872	1.106e-06	-+-??+++?-+-+--+?+????-?++?+--+----+--++---+---++---+-----+-?-+--+?+---?----	64.395	62	0.3928	287248
1	52445520	rs145238135	T	C	0.0039	4.863	1.154e-06	+-+??---?+-+-++-?-????+?--?-++-++++-++--+++-+++--+++-+++++-+?+-++-?-+++?++++	63.706	62	0.4162	287248
1	52448082	rs111331801	T	C	0.0039	4.886	1.028e-06	+-+??---?+-+-++-?-????+?+-?-++-++++-++--+++-+++--+++-+++++-+?+-++-?-+++?++++	64.389	62	0.393	287248
1	52450838	rs78378945	A	G	0.0039	4.884	1.038e-06	+-+??---?+-+-++-?-????+?+-?-++-++++-++--+++-+++--+++-+++++-+?+-++-?-+++?++++	63.763	62	0.4142	287248
1	52454035	rs12403677	T	C	0.0039	4.887	1.022e-06	+-+??---?+-+-++-?-????+?+-?-++-++++-++--+++-+++--+++-0++++-+?+-++-?-+++?++++	63.584	62	0.4204	287248
1	52457159	rs1024311	T	G	0.0053	4.847	1.251e-06	+-+??---++-+-++-?-????+?+-?-++-++++-++--+++-+++--+++--++++-+?+-++-?-+++?++++	64.038	63	0.4399	296320
1	52457816	rs7416150	T	G	0.004	4.922	8.57e-07	+-+??---?+-+-++-?-????+?+-?-++-++++-++--+++-+++--+++-+++++-+?+-++-?-+++?++++	63.456	62	0.4248	287248
1	52460725	rs113285205	A	G	0.0041	4.802	1.572e-06	+-+??---?--+-++-?-????+?+-?-++-++++-++--+++-+++--+++--++++-+?+-++-?-+++?++++	63.985	62	0.4066	287248
1	52461288	rs76890462	A	G	0.004	-4.906	9.299e-07	-+-??+++?-+-+--+?+????-?-+?+--+----+--++---+---++---+0----+-?-+--+?+---?----	63.34	62	0.4289	287248
1	52463389	rs12404984	T	C	0.004	4.937	7.94e-07	+-+??---?+-+-++-?-????+?+-?-++-++++-++--+++-+++--+++-0++++-+?+-++-?-+++?++++	63.519	62	0.4226	287248
1	52468918	rs6697922	A	T	0.0056	4.703	2.564e-06	+-+??---?+-+-++-?-????+?+-?-++-++++-++--+++++++--+++--++++-+?+-++-?-+++?++++	61.572	62	0.4914	287248
1	52485091	rs144414545	A	G	0.0032	-5.051	4.405e-07	-+-??+++?++-+--+?+????-?++?+--+----+--+--------++--------++-?-+--+?+---?----	65.41	62	0.3593	287248
1	52486104	rs7512076	T	C	0.0033	5.055	4.293e-07	+-+??---?--+-++-?-????+?--?-++-++++-++-+++++++---+++--+++--+?+-++-?-+++?++++	64.674	62	0.3834	287248
1	52487462	rs17106967	T	C	0.0032	5.085	3.672e-07	+-+??---?----++-?-????+?--?-++-++++-++-+++++++---+++-++++--+?+-++-?-+++?++++	64.599	62	0.3859	287248
1	52499939	rs17106988	A	G	0.0038	5.174	2.296e-07	+-+??---?--+-++-?-????+?--?+++-++++-++-++++++++--++++-+++--+?+-++-?-+++?++++	69.228	62	0.2467	287248
1	52501152	rs76511642	A	G	0.0032	5.111	3.209e-07	+-+??---?----++-?-????+?--?+++-++++-++-+++++++---+++-++++--+?+-++-?-+++?++++	64.768	62	0.3803	287248
1	52504176	rs12406969	T	G	0.0036	5.219	1.796e-07	+-+??---?--+-++-?-????+?--?+++-++++-++-++++++++--++++0+++--+?+-++-?-+++?++++	69.026	62	0.2521	287248
1	52508198	rs7517383	T	G	0.0037	-5.144	2.692e-07	-+-??+++?++-+--+?+????-?++?---+----+--+--------++----+---++-?-+--+?+---?----	70.31	62	0.2193	287248
1	52508958	rs115050652	T	C	0.0042	-5.095	3.488e-07	-+-??+++-++-+--+?+????-?++?---+----+--++------+++---++---++-?-+--+?+---?----	64.943	63	0.4088	296320
1	52510591	rs76901998	A	G	0.0032	5.176	2.266e-07	+-+??---?----++-?-????+?--?+++-++++-++-+++++++---+++-++++--+?+-++-?-+++?++++	65.171	62	0.367	287248
1	52515629	rs79251774	T	C	0.0031	5.067	4.032e-07	+-+??---?----++-?-????+?--?+++-++++-++--++++++---+++-+++++-+?+-++-?-+++?++++	66.483	62	0.3253	287248
1	52526586	rs17107020	A	G	0.0031	-4.879	1.065e-06	-+-??+++?-+++--+?+????-?++?---+----+--+--------++--------++---+--+?+---?----	69.048	63	0.2805	287447
1	52533505	rs77641225	A	G	0.0033	4.755	1.987e-06	+-+??---?----++-?-????+?--?+++-++++-++-++++++++--++++-+++--+++-++-?-+++?++++	69.599	63	0.2652	287447
1	52538180	rs79070007	T	C	0.0032	4.757	1.969e-06	+-+??---?----++-?-????+?--?+++-++++-++-++++++++--++++-+++--+++-++-?-+++?++++	68.948	63	0.2833	287447
1	52538755	rs12409792	A	G	0.0033	4.83	1.364e-06	+-+??---?+---++-?-????+?--?+++-++++-++-++++++++--++++++++--+++-++-?-+++?++++	67.918	63	0.3134	287447
1	52538977	rs12402556	A	T	0.0033	-4.856	1.198e-06	-+-??+++?-+++--+?+????-?++?---+----+--+--------++--------++---+--+?+---?----	68.373	63	0.2999	287447
1	52538981	rs12405074	A	C	0.0035	4.734	2.199e-06	+-+??---?+---++-?-????+?--?+++-++++-++-++++++++--++++++++--+++-++-?-+++?++++	67.995	63	0.3111	287447
1	52539856	rs113907424	T	G	0.0035	4.788	1.682e-06	+-+??---?----++-?-????+?--?+++-++++-?+-+-++++++--++++-+++--+++-++-?-+++?++++	70.806	62	0.2074	285521
1	52545102	rs78842843	A	G	0.0036	4.705	2.541e-06	+-+??---++---++-?-????+?--?+++-++++-?+-++++++++--+++++++++-+++-++-?-+++?++++	67.964	63	0.312	294593
1	52546591	rs142748424	A	C	0.0037	-4.714	2.429e-06	-+-??+++--+-+--+?+????-?++?---+----+?-+--------++--------++---+--+?+---?----	69.244	63	0.275	294593
1	52547657	rs17107036	A	G	0.0034	-4.753	2e-06	-+-??+++-++++--+?+????-?++?---+----+?-+-------+++----+---++---+--+?+---?----	70.005	63	0.2542	294593
1	52550012	rs6693475	A	G	0.0034	4.716	2.405e-06	+-+??---+----++-?-????+?--?+++-++++-?+-++++++++--++++-+++--+++-++-?-+++?++++	69.365	63	0.2716	294593
1	52551244	rs12402478	A	G	0.0033	4.707	2.513e-06	+-+??---+----++-?-????+?--?+++-++++-?+-+++++++---++++-+++--+++-++-?-+++?++++	69.872	63	0.2578	294593
1	52564719	rs17107037	A	C	0.0033	4.831	1.358e-06	+-+??---++---++-?-????+?--?+++-+-++-++-++++++++--+++++++++-??+-++-?-+++?++++	66.38	62	0.3285	295129
1	52573788	rs144939279	A	G	0.0035	4.686	2.785e-06	+-+??---++-+-++-?-????+?--??++-++++-?+-++++++++--++++++++--+++-++-?-+++?++++	67.722	62	0.2883	290244
1	52582647	rs138675362	A	C	0.0034	4.867	1.131e-06	+-+??---+----++-?-????+?-+?+++-+-++-++-++++++++--++++-+++--+++-++-?-+++?++++	69.107	64	0.3091	296519
1	52591385	rs140038834	T	C	0.0035	4.893	9.946e-07	+-+??---++---++-?-????+?-+?+++-+-++-++-++++-+++--++++++++--+++-++-?-+++?++++	67.409	64	0.3614	296519
1	52593533	rs77626246	A	C	0.0036	4.775	1.796e-06	+-+??---++---++-?-????+?--?+++-+-++-++-++++-+++--+++++++++-+++-++-?-+++?++++	66.9	64	0.3778	296519
1	52594618	rs34995079	T	C	0.0035	4.844	1.275e-06	+-+??---+----++-?-????+?-+?+++-+-++-++-++++-+++--++++-+++--+++-++-?-+++?++++	66.878	64	0.3785	296519
1	52595384	rs75435269	T	C	0.0035	4.903	9.455e-07	+-+??---++---++-?-????+?-+?+++-+-++-++-++++-+++--++++++++--+++-++??-+++?++++	64.517	63	0.4233	296131
1	52597758	rs12404446	T	C	0.0035	4.859	1.177e-06	+-+??---++---++-?-????+?-+?+++-+-++-++-++++-+++--++++++++--+++-++-?-+++?++++	67.083	64	0.3718	296519
1	52598293	rs137950674	A	C	0.0034	-4.846	1.261e-06	-+-??+++--+++--+?+????-?+-?---+-+--+--+----+---++--------++---+--+?+---?----	66.423	64	0.3935	296519
1	52598680	rs145929659	T	C	0.0036	4.699	2.612e-06	+-+??---++---++-?-????+?-+?+++-+-++-++-++++-+++--+++++++++-+++-++-?-+++?++++	67.11	64	0.371	296519
1	52602397	rs138357728	A	G	0.0044	4.767	1.865e-06	+-+??---+++--++-?-????+?-??++--+-++-++-++++++++--+++++++++-+?+-++??-+++?++++	64.57	61	0.353	295554
1	52610799	rs79956031	A	G	0.0035	4.937	7.927e-07	+-+??---++---++-?-????+?-+?+++-++++-++-++++-+++--+++++++++-+++-++-?-+++?++++	65.992	64	0.4078	296519
1	52614091	rs151240627	T	C	0.0035	4.934	8.056e-07	+-+??---++---++-?-????+?-+?+++-++++-++-++++-+++--+++++++++-+++-++-?-+++?++++	65.04	64	0.4402	296519
1	52614526	rs114756152	T	C	0.0035	4.871	1.112e-06	+-+??---++---++-?-????+?-+?+++-++++-++-++++-+++--++++-++++-+++-++-?-+++?++++	65.736	64	0.4165	296519
1	52622226	rs77657755	C	G	0.0034	-4.9	9.584e-07	-+-??+++--+++--+?+????-?+-?---+----+--+----+--+++----+---++---+--+?+---?----	66.17	64	0.4019	296519
1	52624083	rs6700495	A	T	0.0035	-4.875	1.088e-06	-+-??+++--+++--+?+????-?+-?---+----+--+----+---++----+----+---+--+?+---?----	66.167	64	0.402	296519
1	52627634	rs7520155	A	G	0.0034	-4.904	9.394e-07	-+-??+++--+++--+?+????-?+-?---+----+--+----+---++----+---++---+--+?+---?----	66.372	64	0.3951	296519
1	52634033	rs912457	T	C	0.0034	4.868	1.127e-06	+-+??---++---++-?-????+?-+?+++-++++-++-++++-+++--++++-++++-+++-++-?-+++?++++	66.193	64	0.4011	296519
1	52634261	rs115812664	T	C	0.0034	4.845	1.267e-06	+-+??---++---++-?-????+?-+?+++-++++-++-++++-+++--++++-++++-+++-++-?-+++?++++	66.1	64	0.4042	296519
1	52634666	rs1324169	A	G	0.0035	4.944	7.647e-07	+-+??---++---++-?-????+?-+?+++-++++-++-++++-+++--+++++++++-+++-++-?-+++?++++	64.89	64	0.4454	296519
1	52636222	rs149148937	T	G	0.0034	4.892	9.986e-07	+-+??---++---++-?-????+?-+?+++-++++-++-++++-+++--++++-+++--+++-++-?-+++?++++	66.422	64	0.3935	296519
1	52644042	rs6671610	T	C	0.0035	4.949	7.444e-07	+-+??---++---++-?+????+?-+?+++-++++-++-++++-+++--+++++++++-+++-++-?-+++?++++	64.612	64	0.4551	296519
1	52649655	rs12401694	T	C	0.0032	4.711	2.469e-06	+-+??---+----++-?-????+?-+?++--++++-++-++++-+++--++++-++++-+?+-++-?-+++?++++	68.717	63	0.2899	296320
1	52653558	rs12403137	T	C	0.0033	4.91	9.099e-07	+-+??---++---++-?-????+?-+?+++-++++-++-++++-+++--++++-++++-+?+-++-?-+++?++++	65.509	63	0.3898	296320
1	52659814	rs74739157	T	C	0.0033	-4.95	7.413e-07	-+-??+++--+++--+?-????-?+-?---+----+--+----+---++---------+-?-+--+?+---?----	64.318	63	0.4302	296320
1	52661922	rs79922742	T	G	0.0033	-4.873	1.097e-06	-+-??+++--+++--+?+????-?+-?---+----+--+----+---++----+---++-?-+--+?+---?----	66.186	63	0.3676	296320
1	52663836	rs115441632	C	G	0.0044	-4.929	8.283e-07	-+-??+++--+++--+?-????-?+-----+----+--+----+---++----+---++-?-+--+?+---?----	66.257	64	0.399	298886
1	52665234	rs77243509	T	C	0.0044	-4.938	7.887e-07	-+-??+++--+++--+?-????-?+-----+----+--+----+---++----+---++-?-+--+?+---?----	65.828	64	0.4134	298886
1	52672110	rs17363981	A	G	0.0033	-4.833	1.342e-06	-+-??+++--+++---?-????-?+-?---+-+--+--+----+---++---++---++-?-+--+?+---?----	66.647	63	0.3527	296320
1	52675628	rs78407568	A	G	0.0047	-4.946	7.569e-07	-+-??+++--+++---?-????-?+-----+-+--+--+----+---++---++---++-?-+--+?+---?----	66.947	64	0.3762	298886
1	52677789	rs12402304	T	C	0.0038	-4.81	1.51e-06	-+-??+++--+++---?-????-?+-?---+-+--+--+----+---++----+---++-?-+--+?+---?----	66.727	63	0.3502	296320
1	52682554	rs12405232	A	G	0.0047	-4.9	9.566e-07	-+-??+++--+++---?-????-?+-----+-+--+--+----+---++----+---++-?-+--+?+---?----	67.775	64	0.3498	298886
1	52683038	rs144484269	T	G	0.0047	-4.966	6.818e-07	-+-??+++--+++---?-????-?+-----+-+--+--+----+---++---++---++-?-+--+?+---?----	66.626	64	0.3867	298886
1	52683961	rs34453683	A	G	0.0047	4.967	6.794e-07	+-+??---++---+++?+????+?-+++++-+-++-++-++++-+++--+++--+++--+?+-++-?-+++?++++	66.508	64	0.3907	298886
1	52692649	rs112771075	T	C	0.0045	4.917	8.786e-07	+-+??---++---+++?+????+?-+++++-++++-++-++++-+++--+++0-+++--+?+-++-?-+++?++++	69.892	64	0.2863	298886
1	52696159	rs6657731	A	G	0.0049	-4.934	8.049e-07	-+-??+++-++++---?+????-?+-----+-+--+--+----+---++----+---++-?-+--+?+---?----	68.867	64	0.3162	298886
1	52701019	rs75671966	T	G	0.0048	4.931	8.171e-07	+-+??---++---+++?-????+?-+++++-++++-++-++++-+++--+++0-+++--+?+-++-?-+++?++++	68.875	64	0.316	298886
1	52703491	rs35385323	C	G	0.0049	4.891	1.001e-06	+-+??---++---+++?+????+?-+++++-++++-++-++++-+++--+++0-++++-+?+-++-?-+++?++++	69.214	64	0.3059	298886
1	52709686	rs76928255	A	G	0.0048	-4.927	8.331e-07	-+-??+++--+++---?+????-?+-----+----+--+----+---++---0+---++-?-+--+?+---?----	69.677	64	0.2925	298886
1	52715348	rs75223663	A	G	0.0037	-5.019	5.194e-07	-+-??+++--+++---?-????-?+-----+----+--+----+---++---0+----+-?-+--+?+---?----	70.892	64	0.2588	298886
1	52718881	rs10493164	A	G	0.0034	-4.972	6.625e-07	-+-??+++-++++---?-????-?+-----+----+--+----+---++---0+----+-?-+--+?+---?----	69.976	64	0.284	298886
1	52722348	rs78663067	T	C	0.0034	-5.092	3.551e-07	-+-??+++--+++---?-????-?+-----+----+--+----+---++---++----+-?-+--+?+---?----	69.902	64	0.2861	298886
1	52725375	rs115206565	A	G	0.0041	-5.051	4.393e-07	-+-??+++--+++--+?-????-?+-----+-+--+--+----+---++---++----+-?-+--+?+---?----	69.596	64	0.2948	298886
1	52729653	rs75483990	A	G	0.0034	-5.108	3.251e-07	-+-??+++--+++---?-????-?+-----+-+--+--+----+---++---++----+-?-+--+?+---?----	69.615	64	0.2943	298886
1	52737497	rs17372640	A	G	0.0034	-5.096	3.466e-07	-+-??+++--+++--+?-????-?+-----+-+--+--+----+---++---++----+-?-+--+?+---?----	69.984	64	0.2837	298886
1	52744022	rs80318843	A	G	0.0034	-5.043	4.591e-07	-+-??+++--+++--+?-????-?+-----+-+--+--+----+---++---0+----+-?-+--+?+---?----	71.268	64	0.2489	298886
1	52745680	rs17364143	C	G	0.0034	-5.103	3.343e-07	-+-??+++--+++--+?-????-?+-----+-+--+--+----+---++---++----+-?-+--+?+---?----	69.414	64	0.3001	298886
1	52746501	rs114151376	T	G	0.0034	-5.142	2.723e-07	-+-??+++--+++--+?-????-?+-----+-+--+--+----+---++---++----+-?-+--+?+---?----	69.25	64	0.3049	298886
1	52752512	rs17364171	T	C	0.0034	-5.088	3.611e-07	-+-??+++--+++--+?-????-?+-----+-+--+--+----+---++---++----+-?-+--+?+---?----	69.96	64	0.2844	298886
1	52753306	rs79136995	A	G	0.0034	5.037	4.721e-07	+-+??---++---++-?+????+?-+++++-+-++-++-++++-+++--+++0-++++-+?+-++-?-+++?++++	70.794	64	0.2614	298886
1	52754974	rs7541658	T	G	0.0034	-5.097	3.443e-07	-+-??+++--+++--+?-????-?+----++-+--+--+----+---++---++----+-?-+--+?+---?----	69.326	64	0.3026	298886
1	52756658	rs2985372	T	C	0.0034	5.077	3.838e-07	+-+??---++---++-?+????+?-+++++-++++-++-++++-+++--+++--++++-+?+-++-?-+++?++++	69.74	64	0.2907	298886
1	52760050	rs2820335	C	G	0.0034	-5.046	4.514e-07	-+-??+++--+++--+?+????-?+----0+-+--+--+----+---++---++----+-?-+--+?+---?----	70.857	64	0.2597	298886
1	52765877	rs12406697	T	C	0.0034	-4.847	1.255e-06	-+-??+++--+++--+?+????-?+-?---+-+--+--+----+---++---++----+-?-+--+?+---?----	67.273	63	0.3331	296320
1	52771408	rs2753402	C	G	0.0039	-4.794	1.635e-06	-+-??+++-+-++--+?+????-?++----+----+--+----+---++----+----+-?-+--??+---?----	68.327	63	0.3013	298498
1	52772620	rs2820332	T	G	0.0035	4.819	1.44e-06	+-+??---+----++-?-????+?--++++-++++-++-++++-+++--+++--++++-+?+-++??-+++?++++	68.117	63	0.3074	298498
1	52772625	rs2762830	A	G	0.0035	-4.831	1.362e-06	-+-??+++-++++--+?+????-?++----+----+--+----+---++---++----+-?-+--??+---?----	67.737	63	0.3188	298498
1	52777869	rs2762829	A	G	0.0035	4.879	1.068e-06	+-+??---++---++-?+????+?--++++-++++-++-++++-+++--+++--++++-+?+-++??-+++?++-+	65.675	63	0.3843	298498
1	52779069	rs74944906	T	G	0.0035	4.681	2.851e-06	+-+??---++---++-?-????+?-+?+++-++++-++-++++-+++--+++--++++-+?+-++??-+++?++++	63.913	62	0.4091	295932
1	52780335	rs2762828	C	G	0.0038	-4.848	1.245e-06	-+-??+++-+-++--+?+????-?++----+----+--+----+---++----+----+-?-+--??+---?----	67.009	63	0.3413	298498
1	52785140	rs2762826	T	C	0.0035	-4.712	2.448e-06	-+-??+++--+++--+?-????-?++?---+----+--+----+---++---++----+-?-+--??+---?----	64.803	62	0.3791	295932
1	52787775	rs2820329	T	C	0.0035	-4.677	2.913e-06	-+-??+++--+++--+?+????-?++?---+-+--+--+----+---++---++----+-?-+--??+---?----	65.91	62	0.3433	295932
1	52801061	rs2820337	C	G	0.0054	4.76	1.936e-06	+-+??---+----+++?+????+?--++++-++++-++-++++-+++--+++--++++-+?+-++??-+++?++++	67.287	63	0.3326	298498
1	52807780	rs2820336	T	G	0.005	-4.747	2.06e-06	-+-??+++--+++--+?-????-?++----+----+--+----+---++---++----+-?-+--??+---?----	66.238	63	0.3659	298498
1	52808822	rs4475695	A	C	0.0044	-4.716	2.411e-06	-+-??+++-+-++--+?+????-?++?---+----+--+----+---++---++---++-?-+--??+---?----	65.471	62	0.3573	295932
1	52810393	rs58745889	T	C	0.005	4.738	2.162e-06	+-+??---++---++-?+????+?--++++-++++-++-++++-+++--+++--++++-+?+-++??-+++?++++	66.035	63	0.3724	298498
1	52814170	rs7546223	A	G	0.0049	4.723	2.323e-06	+-+??---++---++-?+????+?--++++-++++-++-++++-+++--+++--++++-+?+-++??-+++?++++	65.918	63	0.3763	298498
1	52816959	rs17364363	T	C	0.0048	-4.786	1.704e-06	-+-??+++--+++--+?-????-?++----+----+--+----+---++---++----+-?-+--??+---?----	64.975	63	0.4077	298498
1	52828384	rs11555349	A	G	0.0045	-4.769	1.854e-06	-+-??+++-++++--+?-????-?++----+----+--+----+---++---++----+-?-+--??+---?----	65.455	63	0.3916	298498
1	52829348	rs72899812	T	C	0.0045	4.82	1.432e-06	+-+??---++---++-?+????+?--++++-++++-++-++++-+++--+++--++++-+++-++??-+++?++++	65.474	64	0.4254	298697
1	52834100	rs72899815	A	C	0.0044	4.742	2.115e-06	+-+??---+----++-?+????+?--++++-++++-++-++++-+++--+++--++++-+++-++??-+++?++++	66.111	64	0.4039	298697
1	52843747	rs12035530	A	G	0.0045	4.614	3.959e-06	+-+??---+-+--++-?-????+?--++++-++++-++-++++-+++--++++-++++-+++-++-?-+++?++++	66.615	65	0.4212	299085
1	52855047	rs6672059	T	C	0.0044	4.632	3.621e-06	+-+??---++---++-?-????+?-+++++-++++-++-++++-+++--+++--++++-+++-++??-+++?++++	64.585	64	0.456	298697
1	52856495	rs11802697	T	C	0.0043	4.534	5.794e-06	+-+??---+-+--++-?-????+?--++++-++++-++-++++-+++--+++--++++-+++-++-?-+++?++++	67.341	65	0.397	299085
1	52860110	rs72899839	T	C	0.004	4.662	3.127e-06	+-+??---++---++-?+????+?--++++-++++-++-++++-+++--+++--++++-+?+-++??-+++?++++	64.917	63	0.4097	298498
1	52863683	rs112369447	T	G	0.004	-4.658	3.187e-06	-+-??+++--+++--+?-????-?++----+----+--+----+---++---++----+-?-+--??+---?----	64.397	63	0.4275	298498
1	52866332	rs72899853	C	G	0.004	4.658	3.187e-06	+-+??---++---++-?+????+?--++++-++++-++-++++-+++--+++--++++-+?+-++??-+++?++++	64.89	63	0.4106	298498
1	52885165	rs17364517	T	G	0.0045	-4.621	3.825e-06	-+-??+++---++--+?+????-?+-----+-+--+--+----+---++---++----+-?-+--??+---?----	64.715	63	0.4166	298498
1	52888836	rs7552960	A	T	0.0051	4.719	2.371e-06	+-+??---+----++-?-????+?-+?+++-+-++-+++++++++++--+++--++++-+?+-++-?-+-+?++++	65.036	63	0.4057	296320
1	52888909	rs41294508	T	C	0.0034	4.651	3.308e-06	+-+??---+++--++-?+????+?--?+++-+-++-++-++++-+++--+++--++++-+?+-++??-+-+?++++	64.694	62	0.3828	295932
1	52889891	rs17107217	A	C	0.0054	-4.758	1.956e-06	-+-??+++--+++--+?+????-?+-?---+-+--+-----------++---++----+-?-+--+?+-+-?----	65.333	63	0.3957	296320
1	52894158	rs58770079	T	C	0.0034	4.674	2.948e-06	+-+??---+++--++-?+????+?--?+++-+-++-++-++++-+++--+++--++++-+?+-++??-+-+?++++	64.613	62	0.3855	295932
1	52898176	rs11804976	T	C	0.0034	-4.629	3.669e-06	-+-??+++---++--+?-????-?++?---+-+--+--+----+---++---++----+-?-+--??+-+-?----	64.608	62	0.3856	295932
1	52898229	rs11803338	A	G	0.0034	4.627	3.711e-06	+-+??---+++--++-?+????+?--?+++-+-++-++-++++-+++--+++--++++-+?+-++??-+-+?++++	64.621	62	0.3852	295932
1	52899937	rs7512235	T	C	0.0034	4.635	3.576e-06	+-+??---+++--++-?+????+?--?+++-+-++-++-++++-+++--+++--++++-+?+-++??-+-+?++++	64.46	62	0.3906	295932
1	52901752	rs17373092	T	C	0.0034	-4.632	3.615e-06	-+-??+++---++--+?-????-?++?---+-+--+--+----+---++---++----+-?-+--??+-+-?----	64.593	62	0.3861	295932
1	52904410	rs12407818	T	C	0.0035	-4.639	3.504e-06	-+-??+++---++--+?-????-?++?---+-+--+--+----+---++---++----+-?-+--??+-+-?----	65.193	62	0.3663	295932
1	52908747	rs12406115	A	G	0.0034	4.648	3.357e-06	+-+??---+++--++-?+????+?--?+++-+-++-++-++++-+++--+++--++++-+?+-++??-+-+?++++	64.771	62	0.3802	295932
1	52910109	rs72903609	T	C	0.0034	4.611	4.012e-06	+-+??---+++--++-?+????+?--?+++-+-++-++-++++-+++--+++--++++-+?+-++??-+-+?++++	63.972	62	0.4071	295932
1	52910974	rs7525340	A	C	0.0034	-4.651	3.304e-06	-+-??+++---++--+?-????-?++?---+-+--+--+----+---++---++----+-?-+--??+-+-?----	64.586	62	0.3864	295932
1	52912813	rs6680054	A	T	0.0051	4.691	2.716e-06	+-+??---+----++-?-????+?-+?+++-++++-+++++++++++--+++--++++-+?+-++-?-+-+?++++	64.815	63	0.4131	296320
1	52913903	rs17364642	T	C	0.0034	4.626	3.734e-06	+-+??---+++--++-?+????+?--?+++-++++-++-++++-+++--+++--++++-+?+-++??-+-+?++++	63.806	62	0.4128	295932
1	52916664	rs112817320	A	G	0.0034	4.555	5.237e-06	+-+??---+++--++-?-????+?--?+++-++++-++-++++-+++--++++-++++-+?+-++??-+++?++++	63.777	62	0.4138	295932
1	52917372	rs12407372	A	G	0.0033	4.539	5.64e-06	+-+??---+++--+++?-????+?--?+++-+-++-++-++++-+++--+++--++++-+?+-++??-+-+?++++	63.833	62	0.4118	295932
1	52917647	rs78599257	T	C	0.0038	-4.666	3.077e-06	-+-??+++---++--+?+????-?+-?--++----+--?--------++---0+----+-?-+--??+-+-?----	63.479	61	0.3891	295633
1	52921448	rs72903628	T	C	0.0051	4.542	5.574e-06	+-+??---+----++-?-????+?-+?+++-++++-+++++++++++--+++--++++-+?+-++-?-+-+?++++	64.949	63	0.4086	296320
1	52922071	rs143153805	A	G	0.0052	4.586	4.526e-06	+-+??---+++--++-?+????+?--?+++-++++-++-++++-+++--+++--++++-+?+-++??-+-+?++-+	64.954	62	0.3742	295932
1	52929339	rs41294510	A	G	0.0051	4.536	5.728e-06	+-+??---+----++-?-????+?-+?+++-++++-+++++++++++--+++--++++-+?+-++-?-+-+?++++	64.896	63	0.4104	296320
1	52931183	rs7512768	T	C	0.005	-4.557	5.181e-06	-+-??+++-++++--+?+????-?+-?---+----+-----------++---++----+-?-+--+?+-+-?----	64.798	63	0.4137	296320
1	52933435	rs72903641	A	C	0.0034	4.621	3.811e-06	+-+??---+++--++-?+????+?--?+++-++++-++-++++-+++--+++--++++-+?+-++??-+-+?++++	63.844	62	0.4115	295932
1	52935050	rs72903643	A	G	0.0034	4.626	3.73e-06	+-+??---+++--++-?+????+?--?+++-++++-++-++++-+++--+++--++++-+?+-++??-+-+?++++	63.618	62	0.4192	295932
1	52937144	rs34557235	T	C	0.0034	-4.65	3.326e-06	-+-??+++---++--+?-????-?++?---+----+--+----+---++---++----+-?-+--??+-+-?----	63.458	62	0.4247	295932
1	52948750	rs72903653	T	C	0.0051	-4.565	4.996e-06	-+-??+++---++--+?-????-?++?---+----+--+----+---++---++----+-?-+--+?+-+-?----	66.097	63	0.3704	296320
1	52949594	rs72903655	A	C	0.0034	-4.646	3.383e-06	-+-??+++---++--+?-????-?++?---+----+--+----+---++---++----+-?-+--??+-+-?----	63.473	62	0.4242	295932
1	52950551	rs57663833	A	G	0.0034	4.643	3.431e-06	+-+??---+++--++-?+????+?--?+++-++++-++-++++-+++--+++--++++-+?+-++??-+-+?++++	63.618	62	0.4192	295932
1	52951323	rs17107246	A	G	0.008	-4.534	5.779e-06	-+-??+++-++++--+?+????-?+-?---+----+-----------++---++----+-?-+--+?+-+-?--+-	66.449	63	0.359	296320
1	52952869	rs12402446	A	G	0.0052	4.434	9.236e-06	+-+??---+--+-+++?-????+?-+?+++-++++-+++++++++++--+++--++++-+?+-++-?-+-+?++++	65.425	63	0.3926	296320
1	52955111	rs17364950	T	C	0.0034	-4.659	3.176e-06	-+-??+++---++--+?-????-?++?---+----+--+----+---++---++----+-?-+--??+-+-?----	63.38	62	0.4275	295932
1	52959800	rs11807950	A	C	0.0034	4.663	3.118e-06	+-+??---+++--++-?+????+?--?+++-++++-++-++++-+++--+++--++++-+?+-++??-+-+?++++	63.49	62	0.4237	295932
1	52960131	rs11205963	A	G	0.0034	-4.671	2.995e-06	-+-??+++---++--+?-????-?++?---+----+--+----+---++---++----+-?-+--??+-+-?----	63.447	62	0.4251	295932
1	52961888	rs11205964	T	C	0.0035	-4.539	5.65e-06	-+-??+++--+++--+?+????-?++?---+----+-------+---++----+----+-?-+--+?+---?----	67.367	63	0.3302	296320
1	52964160	rs144781018	T	C	0.0042	4.959	7.079e-07	+-+??-?-+-+--+++?+????+?--?+++-++++-++-++++-+++--+++--+++--+?+-++??-+-+?++++	59.855	61	0.5175	295752
1	52965491	rs7355078	T	C	0.005	4.71	2.481e-06	+-+??---+----++-?-????+?-+?+++-++++-+++++++++++--+++--++++-+?+-++-?-+-+?++++	64.556	63	0.422	296320
1	52968914	rs72903681	T	C	0.0034	-4.67	3.017e-06	-+-??+++---++--+?-????-?++?---+----+--+----+---++---++----+-?-+--??+-+-?----	63.357	62	0.4283	295932
1	52970046	rs6679448	A	G	0.0034	4.689	2.752e-06	+-+??---+++--++-?+????+?--?+++-++++-++-++++-+++--+++--++++-+?+-++??-+-+?++++	63.6	62	0.4199	295932
1	52977507	rs58792030	T	C	0.0034	4.686	2.781e-06	+-+??---+++--++-?+????+?--?+++-++++-++-++++-+++--+++--++++-+?+-++??-+-+?++++	63.382	62	0.4274	295932
1	52979822	rs17365027	A	T	0.0034	4.685	2.801e-06	+-+??---+++--++-?+????+?--?+++-++++-++-++++-+++--+++--++++-+?+-++??-+-+?++++	63.587	62	0.4203	295932
1	52980317	rs12407960	T	C	0.0034	-4.68	2.863e-06	-+-??+++---++--+?-????-?++?---+----+--+----+---++---++----+-?-+--??+-+-?----	63.682	62	0.417	295932
1	52987128	rs12737682	A	G	0.0034	4.695	2.666e-06	+-+??---+++--++-?+????+?--?+++-++++-++-++++-+++--+++--++++-+?+-++??-+-+?++++	63.738	62	0.4151	295932
1	52991983	rs57766167	A	G	0.0034	-4.665	3.081e-06	-+-??+++---++--+?-????-?++?---+----+--+----+---++---0+----+-?-+--??+-+-?----	64.091	62	0.403	295932
1	52992254	rs72903702	A	G	0.0034	-4.696	2.647e-06	-+-??+++---++--+?-????-?++?---+----+--+----+---++---0+----+-?-+--??+-+-?----	63.89	62	0.4099	295932
1	52993646	rs144543585	T	C	0.0033	4.606	4.111e-06	+-+??---+++--++-?+????+?--?+++-++++-++-++++-+++--+++0-+++--+?+-++??-+-+?++++	64.992	62	0.3729	295932
1	52993712	rs112426904	A	G	0.0051	-4.793	1.64e-06	-+-??+++-++++--+?+????-?+-?---+----+-----------++---++----+-?-+--+?+-+-?----	64.241	63	0.4328	296320
1	52994674	rs72905605	T	C	0.0034	4.695	2.664e-06	+-+??---+++--++-?+????+?--?+++-++++-++-++++-+++--+++0-++++-+?+-++??-+-+?++++	63.984	62	0.4067	295932
1	52994822	rs17365082	A	G	0.0034	4.697	2.645e-06	+-+??---+++--++-?+????+?--?+++-++++-++-++++-+++--+++0-++++-+?+-++??-+-+?++++	63.937	62	0.4083	295932
1	52998102	rs12409239	A	G	0.0034	4.609	4.044e-06	+-+??---+++--++-?+????+?--?+++-++++-++-++++-+++--++++-++++-+?+-++??-+-+?++++	63.761	62	0.4143	295932
1	53003821	rs11805462	T	C	0.0051	4.777	1.783e-06	+-+??---+----++-?-????+?-+?+++-++++-+++++++++++--+++--++++-+?+-++-?-+-+?++++	64.977	63	0.4077	296320
1	53006938	rs113417544	T	C	0.0034	4.698	2.629e-06	+-+??---++---++-?+????+?--?+++-++++-++-++++-+++--++++-++++-+?+-++??-+-+?++++	63.916	62	0.409	295932
1	53008039	rs11800551	T	C	0.0034	-4.668	3.038e-06	-+-??+++--+++--+?-????-?++?---+----+--+----+---++----+----+-?-+--??+-+-?----	64.174	62	0.4002	295932
1	53012475	rs59449688	T	C	0.0038	4.776	1.792e-06	+-+??---++---++-?+????+?--++++-++++-++-++++-+++--++++-++++-+?+-++??-+-+?++++	64.435	63	0.4261	298498
1	53013518	rs72905633	C	G	0.004	4.69	2.734e-06	+-+??---++---++-?+????+?--++++-++++-++-++++++++--++++-++++-+?+-++??-+-+?++-+	62.393	63	0.4979	298498
1	53018012	rs7511710	A	G	0.0038	4.747	2.068e-06	+-+??---++---++-?+????+?--++++-++++-++-++++-+++--++++-++++-+?+-++??-+-+?++-+	64.661	63	0.4184	298498
1	53021961	rs6588430	A	T	0.0037	-4.754	1.991e-06	-+-??+++--+++--+?-????-?++----+----+--+----+---++----+----+-?-+--??+-+-?--+-	65.029	63	0.4059	298498
1	53025850	rs72905643	T	C	0.0038	-4.758	1.959e-06	-+-??+++--+++--+?-????-?++---0+----+--+----+--+++----+----+-?-+--+?+---?--+-	66.942	64	0.3764	298886
1	53034164	rs72905655	T	C	0.0036	4.756	1.979e-06	+-+??---++---++-?+????+?--++++-++++-++-++++-+++--++++-++++-+?+-++??-+-+?++-+	64.847	63	0.4121	298498
1	53036097	rs17365252	A	G	0.0036	4.766	1.876e-06	+-+??---++---++-?+????+?--++++-++++-++-++++-+++--++++-++++-+?+-++??-+-+?++-+	64.896	63	0.4104	298498
1	53036467	rs77436971	A	T	0.0036	-4.749	2.041e-06	-+-??+++--+++--+?-????-?++----+----+--+----+---++----+----+-?-+--??+-+-?--+-	65.139	63	0.4022	298498
1	53039603	rs17373814	T	C	0.0036	-4.739	2.147e-06	-+-??+++--+++--+?-????-?++----+----+--+?---+---++----+----+-?-+--??+-+-?--+-	64.952	62	0.3742	296708
1	53039717	rs113788994	T	C	0.0036	4.734	2.199e-06	+-+??---++---++-?+????+?--++++-++++-++-++++-+++--++++-++++-+?+-++??-+-+?++-+	64.608	63	0.4202	298498
1	53040968	rs11205975	A	G	0.0035	-4.749	2.049e-06	-+-??+++--+++--+?-????-?++----+----+--+----+---++----+----+-?-+--??+-+-?--+-	64.505	63	0.4237	298498
1	53041145	rs12407692	A	G	0.0036	-4.733	2.213e-06	-+-??+++--+++--+?-????-?++----+----+--+----+---++----+----+-?-+--??+-+-?--+-	64.309	63	0.4305	298498
1	53044049	rs72905667	T	C	0.0036	4.741	2.128e-06	+-+??---++---++-?+????+?--++++-++++-++-++++-+++--++++-++++-+?+-++??-+-+?++-+	64.279	63	0.4315	298498
1	53055997	rs111967467	T	C	0.0038	4.577	4.708e-06	+-+??---++-+-++-?+????+?-+++++-+-++-++-++++-+++--++++-+++--+?+-++??-+++?++-+	67.467	63	0.3271	298498
1	53070377	rs34019243	T	C	0.0039	4.45	8.589e-06	+-+??---++++-++-?-????+?-++++--+-++-++--+++-+++--++++-+++--+?+-++-?-+-+?++-+	66.236	64	0.3997	298886
1	53073242	rs35226390	A	G	0.004	4.487	7.214e-06	+-+??---++++-++-?-????+?-++++--+-++-++-++++-++---++++-+++--+?+-++-?-+-+?++-+	66.863	64	0.379	298886
1	53074412	rs1047619	A	G	0.0043	-4.57	4.869e-06	-+-??+++--+-+--+?+????-?+----++-+--+--+----+---++----+---++---+--+?+-+-?--+-	70.234	65	0.3066	299085
1	53075062	rs111363630	T	C	0.0041	4.428	9.521e-06	+-+??---++++-++-?-????+?-++++--+-++-++-++++-+++--++++-+++--+++-++-?-+-+?++-+	70.838	65	0.2893	299085
1	53079309	rs60001856	C	G	0.004	4.515	6.346e-06	+-+??---++++-++-?-????+?-++++--+-++-++-++++-+++--++++-+++--+++-++-?-+-+?++-+	69.307	65	0.3344	299085
1	53081585	rs6671552	A	G	0.0042	-4.482	7.404e-06	-+-??+++----+--+?+????-?+----++-+--+--+----+--+++----+---++---+--+?+-+-?--+-	68.907	65	0.3467	299085
1	53082579	rs112928562	A	G	0.004	4.439	9.02e-06	+-+??---++++-+++?-????+?-++++--+-++-++-++++-++---++++-+++--+++-++-?++-+-++-+	69.139	66	0.3719	299261
1	53082829	rs72907505	A	T	0.0042	-4.548	5.415e-06	-+-??+++-+--+---?+????-?+----++-+--+--+----+--+++----+--+++---+--+?--+-+--+-	69.713	66	0.3538	299261
1	54469084	rs72664111	T	C	0.0088	4.853	1.216e-06	---??-?-++-+++--?++???+?+-??++--++++++-+++++-+-+++?++-+++++??++++-+-+-+?++++	54.779	61	0.6994	290629
1	54471953	rs72664115	T	G	0.0077	-4.594	4.358e-06	+++??+?+--+---++?--???-?-+??--++------++---++-++--?--+-----??------++++?----	50.856	61	0.8195	290629
1	59528557	rs10443249	A	G	0.0111	-4.853	1.217e-06	--+-+-+---++-+---+-+-++--+--++--+--+---+++++-+++++----+---+-++-+++--+-------	74.111	75	0.5073	300486
1	59528844	rs4622084	T	C	0.0112	-4.966	6.848e-07	--+-+-+---++-+---+-+-++--+--++--+--+---+++++-+++++----+---+-++-+++-++-------	74.219	75	0.5038	300486
1	59529809	rs10443250	A	T	0.0113	-4.881	1.057e-06	--+-+-+---++-+---+-+-++--+--++--+--+---+++++-+++++----+---+-++-+++-++-------	74.728	75	0.4871	300486
1	59540811	rs6587843	T	C	0.0105	5.096	3.471e-07	++-+-+-+++--+-+++-+-+--++-++--++-++-+++----++-----++++-+++-+--+---+--+++++++	78.518	75	0.368	300486
1	59544435	rs4424536	A	G	0.0099	5.083	3.719e-07	++-+-+-+++--+-+++-+-+--++--+--++-++-+++----++-----++++-+++-+--+---+--+++++++	77.357	75	0.4033	300486
1	59545405	rs4456117	A	C	0.0094	-5.112	3.181e-07	--+-+-+---++-+---+-+-++--++-++--+--+---++++--+++++----+---+-++-+++-++-------	77.69	75	0.3931	300486
1	59553025	rs3010317	A	G	0.0093	-5.288	1.235e-07	--+-+-+---++-+---+-+-++--+--++--+--++--++++--+++++----+---+-++-+++-++-------	78.275	75	0.3753	300486
1	59553662	rs2989868	A	G	0.0095	5.316	1.062e-07	++-+-+-+++--+-+++-+-+--++-++--++-++--++-----+-----++++-+++-+--+---+-++++++++	76.289	75	0.4368	300486
1	59560337	rs1831539	T	C	0.0094	-5.355	8.552e-08	--+-+-+---++-+---+-+-++--+--+---+--++--++++--+++++--------+-++-+++-++-------	76.722	75	0.4231	300486
1	59561367	rs6668586	A	G	0.0108	4.974	6.572e-07	++-+++-+++--+-+++-+-++-+--++-+-+-+---++----++---+-+++-++++-++-+------++-++++	81.055	75	0.2961	300486
1	64617794	rs147482589	T	G	0.0007	-4.505	6.629e-06	?????????-???????-??????-??+?????-??????????????????????????????????????--?-	11.036	7	0.1371	205612
1	66322769	rs564109448	A	T	0.0001	-4.591	4.412e-06	?????????????????????????????????-??????????????????????????????????????-??-	3.979	2	0.1368	172739
1	69169563	rs1492057	T	C	0.0051	-5.032	4.843e-07	-+++?+-+---+++-+?+-???-------++-+----+-+----++++++-++-+--++-+-+----+---+----	71.523	70	0.427	300010
1	69171631	rs1826355	A	G	0.0054	-4.762	1.918e-06	-+++?+-+---+++-+?+-???------++--+----+-+----++++++-++-+--++-+-+----+--++----	68.263	70	0.5365	300010
1	69171869	rs2420178	A	G	0.0055	4.734	2.202e-06	+---?-+-+++---+-?-+???++++++--++-++++-+--+++------+--+-++--+-+-++++-++--++++	70.044	70	0.476	300010
1	69181489	rs1492069	T	G	0.0051	-5.051	4.406e-07	-+++?+-+---+++-+?+-???-------++-+----+-+----++++++--+-+--++-+-+----+---+----	70.348	70	0.4659	300010
1	69184214	rs854286	A	G	0.0049	5.114	3.152e-07	+---?-+-+++---+-?-+???+++++++--+-++++-+-++++------++-+-++--+-+-++++-+++-++++	70.873	70	0.4484	300010
1	69186066	rs854287	A	G	0.005	5.103	3.337e-07	+---?-+-+++---+-?-+???+++++++--+-++++-+-++++------++-+-++--+-+-++++-+++-++++	70.992	70	0.4444	300010
1	69193295	rs995841	T	C	0.005	-4.989	6.071e-07	-+++?+-+---+++-+?+-???-------++-+----+-+----++++++--+-+--++-+-+----+---+----	71.181	70	0.4382	300010
1	69194540	rs1492065	C	G	0.005	-5.051	4.393e-07	-+++?+-+---+++-+?+-???-------++-+----+-+----++++++--+-+--++-+-+----+---+----	70.368	70	0.4652	300010
1	69208217	rs1826358	A	G	0.005	5.001	5.702e-07	+---?-+-+++---+-?-+???+++++++--+-++++-+-++++------++-+-++--+-+-++++-+++-++++	70.114	70	0.4737	300010
1	69211220	rs11801277	T	C	0.005	5.025	5.042e-07	+---?-+-+++---+-?-+???+++++++--+-++++-+-++++------++-+-++--+-+-++++-+++-++++	70.145	70	0.4726	300010
1	69216796	rs854256	T	G	0.005	4.991	5.996e-07	+---?-+-++++--+-?-+???+++++++--+-++++-+-++++------++-+-++--+-+-++++-+++-++++	70.967	70	0.4452	300010
1	69219041	rs854257	A	T	0.0049	-5.022	5.104e-07	-+++?+-+----++-+?+-???-------++-+----+-+----++++++--+-+--++-+-+----+---+----	70.588	70	0.4578	300010
1	69223328	rs699226	T	C	0.0049	4.994	5.908e-07	----?-+-++++--+-?-+???+++++++--+-++++-+-++++------++-+-++--+-+-++++-+++-++++	70.387	70	0.4645	300010
1	69223688	rs854259	A	C	0.0049	5.025	5.022e-07	----?-+-++++--+-?-+???+++++++--+-++++-+-++++------++-+-++--+-+-++++-+++-++++	70.619	70	0.4568	300010
1	69224790	rs854260	T	C	0.0049	-5.028	4.967e-07	++++?+-+----++-+?+-???-------++-+----+-+----++++++--+-+--++-+-+----+---+----	70.576	70	0.4582	300010
1	69226886	rs2420180	A	C	0.0105	-4.714	2.428e-06	++++?+-+----++-+?+-???-------++-+---++-+----++++++-++-+--++??+-----+---+----	64.773	68	0.5885	298620
1	69227337	rs2745543	A	G	0.0049	-5.011	5.404e-07	++++?+-+----++-+?+-???-------++-+----+-+----++++++--+-+--++-+-+----+---+----	70.283	70	0.468	300010
1	69231275	rs864957	T	C	0.0049	-4.995	5.897e-07	++++?+-+----++-+?+-???-------++-+----+-+----++++++--+-+--++-+-+----+---+----	70.468	70	0.4618	300010
1	69236380	rs854276	A	G	0.005	4.994	5.927e-07	----?-+-++++--+-?-+???+++++++--+-++++-+-++++------++-+-++--+-+-++++-+++-++++	71.45	70	0.4293	300010
1	69237051	rs699228	A	G	0.0048	-5.005	5.593e-07	++++?+-+----++-+?+-???-------++-+----+-+----+-++++--+-+--++-+-+----+---+----	70.587	70	0.4579	300010
1	69237163	rs861252	A	C	0.0049	-5.013	5.348e-07	++++?+-+----++-+?+-???-------++-+----+-+----++++++--+-+--++-+-+----+---+----	70.737	70	0.4529	300010
1	69242824	rs699229	A	C	0.0049	5.03	4.902e-07	----?-+-++++--+-?-+???+++++++--+-++++-+-++++-+----++-+-++--+-+-++++-+++-++++	70.768	70	0.4519	300010
1	69244573	rs854271	T	C	0.0048	4.95	7.436e-07	----?-+-++++--+-?-+???+++++++--+-++++-+-++++-+----++-+-++--+-+-++++-+++-++++	70.302	70	0.4674	300010
1	69245272	rs854270	T	C	0.0049	-5.017	5.25e-07	++++?+-+----++-+?+-???-------++-+----+-+----+-++++--+-+--++-+-+----+---+----	70.773	70	0.4517	300010
1	69253104	rs61104245	T	C	0.0049	-5.012	5.379e-07	++++?+-+----++-+?+-???-------++-+----+-+----+-++++--+-+--++-+-+----+---+----	70.913	70	0.447	300010
1	69254610	rs12082973	A	G	0.0049	5.037	4.74e-07	----?-+-++++--+-?-+???+++++++--+-++++-+-++++-+----++-+-++--+-+-++++-+++-++++	71.04	70	0.4428	300010
1	69261593	rs12090652	T	C	0.005	-5.027	4.989e-07	++++?+-+----++-+?+-???-------++-+----+-+----+-++++--+-+--++-+-+----+---+----	70.533	70	0.4597	300010
1	69263506	rs12088265	A	G	0.0049	5.042	4.603e-07	----?-+-++++--+-?-+???+++++++--+-++++-+-++++-+----++-+-++--+-+-++++-+++-++++	70.672	70	0.455	300010
1	69265731	rs11209352	T	C	0.005	-5.003	5.64e-07	++++?+-+----++-+?+-???-------++-+----+-+----+-++++--+-+--++-+-+----+---+----	70.956	70	0.4456	300010
1	69266908	rs115165658	T	C	0.005	5.082	3.741e-07	----?-+-++++--+-?-+???+++++++--+-++++-+-++++-+----++-+-++--+-+-++++-+++-++++	70.36	70	0.4655	300010
1	69267354	rs72680408	A	T	0.005	-5.094	3.504e-07	++++?+-+----++-+?+-???-------++-+----+-+----+-++++--+-+--++-+-+----+---+----	70.253	70	0.469	300010
1	69270225	rs11209354	A	G	0.0049	5.034	4.793e-07	----?-+-++++--+-?-+???+++++++--+-++++-+-++++-+----++-+-++--+-+-++++-+++-++++	69.985	70	0.478	300010
1	69270936	rs61081205	T	G	0.0049	5.086	3.649e-07	----?-+-++++--+-?-+???+++++++--+-++++-+-++++-+----++-+-++--+-+-++++-+++-++++	69.944	70	0.4794	300010
1	69273439	rs10493450	A	T	0.005	-5.098	3.428e-07	++++?+-+----++-+?+-???-------++-+----+-+----+-++++--+-+--++-+-+----+---+----	70.05	70	0.4758	300010
1	69273959	rs12075697	T	C	0.0049	5.096	3.463e-07	----?-+-++++--+-?-+???+++++++--+-++++-+-++++-+----++-+-++--+-+-++++-+++-++++	69.969	70	0.4786	300010
1	69279222	rs12065097	A	C	0.005	-5.091	3.554e-07	++++?+-+----++-+?+-???-------++-+----+-+----+-++++--+-+--++-+-+----+---+----	69.701	70	0.4876	300010
1	69282115	rs12059133	A	G	0.0049	5.094	3.503e-07	----?-+-++++--+-?-+???+++++++--+-++++-+-++++-+----++-+-++--+-+-++++-+++-++++	70.492	70	0.461	300010
1	69284323	rs112134147	T	C	0.0056	5.121	3.039e-07	----?-+-++++--+-?-+???+++++++----++++-+-++++-+----++-+-++--+-+-++++-+++-++++	77.482	70	0.2524	300010
1	69287391	rs9887767	A	C	0.005	4.966	6.849e-07	----?-+-++++--+-?-+???+++++++----++++-+-++++-+----++-+-++--+++-++++-+++-++++	69.991	70	0.4778	300010
1	69289236	rs9887801	T	C	0.005	4.946	7.588e-07	----?-+-++++--+-?-+???+++++++----++++-+-++++-+----++-+-++--+++-++++-+++-++++	69.215	70	0.5041	300010
1	69292081	rs11579356	A	G	0.0048	4.978	6.437e-07	----?-+-++++--+-?-+???+++++++----++++-+-++++------++-+-++--+++-++++-+++-++++	71.054	70	0.4424	300010
1	69295023	rs955842	T	C	0.0051	-4.818	1.449e-06	++++?+-+----++-+?+-???-------++++----+-+----++++++--+-+--++---+----+---+----	68.402	70	0.5317	300010
1	69295070	rs955841	A	G	0.0052	-4.998	5.781e-07	++++?+-+----++-+?+-???-------++++----+-+----++++++-++-+--++---+----+---+----	72.128	70	0.4074	300010
1	69298988	rs6671981	A	G	0.0052	4.782	1.736e-06	----?-+-++++--+-?-+???+++++++----++++-+-++++------++-+-++--+++-++++-+++-++++	67.671	70	0.5567	300010
1	69299046	rs6672072	A	G	0.0052	4.763	1.912e-06	----?-+-++++--+-?-+???+++++++----++++-+-++++------++-+-++--+++-++++-+++-++++	67.394	70	0.5661	300010
1	69301219	rs11588891	T	C	0.005	4.938	7.88e-07	----?-+-++++--+-?-+???+++++++----++++-+-++++------+--+-++--+++-++++-+++-++++	69.172	70	0.5055	300010
1	69302144	rs11589397	T	C	0.0052	4.974	6.568e-07	----?-+-++++--+-?-+???+++++++----++++-+-++++------+--+-++--+++-++++-+++-++++	70.285	70	0.4679	300010
1	69302771	rs17488264	T	C	0.0052	-5.014	5.344e-07	++++?+-+----++-+?--???-------++++----+-+----++++++--+-+--++---+----+---+----	69.857	70	0.4823	300010
1	69303617	rs2131125	T	C	0.0053	-4.534	5.795e-06	+-++?--+----++--?--???-------++++---++--+--+++++++-++++--++---+----+---+-+--	72.078	70	0.409	300010
1	69304252	rs11209356	C	G	0.0047	-4.718	2.376e-06	+-++?--+----++--?--???-------++++---++-++--+++++++-++++--++---+----+---+-+--	74.681	70	0.3288	300010
1	69306780	rs11209357	A	G	0.0057	5.259	1.45e-07	----?+++++++--++?-+???+++++++----+++---++++-------+----+----++-++++-+++++-++	68.141	70	0.5406	300010
1	69309391	rs57887245	T	C	0.0058	-5.25	1.522e-07	+-++?-------++--?--???-----+-++++----++----+++++++--+++--+++--+----+-----+--	68.767	70	0.5193	300010
1	69310422	rs1388650	C	G	0.0058	5.302	1.143e-07	----?+++++++--++?++???+++++++----+++---+++++------+----+----++-++++-+++++-++	68.183	70	0.5392	300010
1	69310692	rs72680446	A	C	0.0058	-5.295	1.192e-07	++++?-------++--?--???-------++++---+++-----++++++-++++-++++--+----+-----+--	69.397	70	0.4979	300010
1	69312383	rs4145632	A	T	0.0061	-5.096	3.465e-07	++++?-------++--?+-???-------++++---+++----+++++++-++++-++++--+----+-----+--	65.6	70	0.6268	300010
1	69315228	rs9988609	A	G	0.0061	5.088	3.62e-07	----?+++++++--++?-+???+++++++----+++---++++-------+----+----++-++++-+++++-++	65.281	70	0.6374	300010
1	69316628	rs115699118	A	G	0.0058	5.211	1.876e-07	----?+++++++--++?++???+++++++----+++---+++++------+----+----+--++++-+++++-++	68.748	70	0.5199	300010
1	69318202	rs1844945	T	C	0.0063	-5.085	3.675e-07	++++?-------++--?+-???-------++++---+++----+++++++-++++-++++--+----+-----+--	65.9	70	0.6167	300010
1	69318536	rs1826357	T	G	0.0061	-5.068	4.026e-07	++++?-------++--?+-???-------++++---+++----+++++++-++++-++++--+----+-----+--	65.485	70	0.6306	300010
1	69318871	rs12081058	T	G	0.0056	5.138	2.77e-07	----?+++++++--++?++???+++++++----+++---++++-------+----+----+--++++-+++++-++	67.08	70	0.5768	300010
1	69318950	rs12092194	A	G	0.0057	-5.189	2.118e-07	++++?-------++--?--???-------++++---+++----+++++++-++++-++++-++----+-----+--	66.981	70	0.5802	300010
1	69319269	rs1586834	A	G	0.006	5.121	3.032e-07	----?+++++++--++?-+???+++++++----+++---++++-------+----+----++-++++-+++++-++	66.264	70	0.6045	300010
1	69323222	rs7414744	T	C	0.006	5.15	2.6e-07	----?+++++++--++?++???+++++++----+++---++++-------+----+----+--++++-+++++-++	69.426	70	0.4969	300010
1	69328993	rs11589723	T	C	0.0066	-5.249	1.53e-07	++++?--+-----+--?--???----+--++-+---+++----+++++++-++-+-+-+++-+-+--+-----+--	60.604	70	0.781	300010
1	69329184	rs56197584	T	C	0.0066	5.227	1.722e-07	----?++++++++-++?++???++++-++--+-+++---++++-------+--+-+-+---+-+-++-+++++-++	61.375	70	0.7594	300010
1	69329661	rs55695883	T	C	0.0065	5.185	2.165e-07	----?++++++++-++?++???++++-++--+-+++---++++-------+--+-+-+---+-+-++-+++++-++	61.222	70	0.7637	300010
1	69331103	rs139380747	T	C	0.0063	5.161	2.461e-07	----?++++++++-++?++???++++-++--+-+++---++++-------+--+-+-+---+-+-++-+++++-++	60.161	70	0.793	300010
1	69331299	rs7552964	A	T	0.0065	5.182	2.2e-07	----?++++++++-++?++???++++-++--+-+++---++++-------+--+-+-+---+-+-++-+++++-++	60.469	70	0.7847	300010
1	69331338	rs7518408	A	C	0.0065	-5.172	2.315e-07	++++?--------+--?--???----+--++-+---+++----+++++++-++-+-+-+++-+-+--+-----+--	60.59	70	0.7814	300010
1	69332219	rs72680454	T	G	0.0069	-5.278	1.305e-07	++++?+-------+--?--???-------++-+---+++----+++++++-++-+-+-+++-+-+-++-----+--	61.088	70	0.7676	300010
1	69332220	rs72680455	T	C	0.007	-5.265	1.4e-07	++++?+-------+--?--???-------++-+---+++----+++++++-++-+-+-+++-+-+-++-----+--	61.285	70	0.762	300010
1	69332409	rs12240114	C	G	0.0062	5.162	2.44e-07	----?++++++++-++?++???+++++++--+-+++---++++-------+--+-+-+---+-+-+--+++++-++	58.393	70	0.8374	300010
1	69332567	rs9436416	A	T	0.0063	-5.105	3.311e-07	++++?-----+--+--?--???-------++-+---+++----+++++++-++-+-+-+++-+-+-++-----+--	58.175	70	0.8425	300010
1	69332670	rs72680457	A	G	0.0065	-5.196	2.032e-07	++++?--------+--?--???----+--++-+---+++----+++++++-++-+-+-+++-+-+--+-----+--	60.486	70	0.7843	300010
1	69332742	rs72680458	A	G	0.0066	-5.177	2.254e-07	++++?--------+--?--???----+--++-+---+++----+++++++-++-+-+-+++-+-+--+-----+--	60.685	70	0.7788	300010
1	69333268	rs11582472	T	C	0.0064	5.166	2.395e-07	----?++++++++-++?++???++++-++--+-+++---++++-------+--+-+-+---+-+-++-+++++-++	59.967	70	0.7982	300010
1	69334154	rs11577312	T	C	0.0065	-5.161	2.462e-07	++++?--------+--?--???----+--++-+---++++---+++++++-++-+-+-+++-+-+--+-----+--	60.066	70	0.7956	300010
1	69334834	rs6674177	A	G	0.0063	5.165	2.409e-07	----?++++++++-++?++???+++++++--+-+++---++++-------+--+-+-+---+-+-+--+++++-++	57.877	70	0.8493	300010
1	69335912	rs150821249	A	G	0.0066	-5.203	1.963e-07	++++?--+-----+--?--???----+--++-+---+++----+++++++-++-+-+-+++-+-+--+-----+--	60.016	70	0.7969	300010
1	69336098	rs28450101	T	C	0.0062	5.084	3.689e-07	----?++++++++-++?++???++++-++--+-+++---++++-------+--+-+-+---+-+-+--+++++-++	59.355	70	0.814	300010
1	69336277	rs28759443	T	C	0.0089	5.234	1.658e-07	----?++-+++++-++?++???++++-++--+-+++-+-++++-------+--+-+-----+++-++-+++++-++	62.784	70	0.7174	300010
1	69337596	rs72680459	A	G	0.0066	5.113	3.176e-07	----?++-++++--++?++???++++-++--+-+++----+++-------+--+-+-+---+-+-++-+++++-++	59.659	70	0.8062	300010
1	69338706	rs13374447	T	C	0.0066	5.135	2.824e-07	----?++-+++++-++?++???++++-++--+-+++---++++-------+--+-+-+---+-+-++-+++++-++	58.23	70	0.8412	300010
1	69339818	rs55790538	A	C	0.0065	5.071	3.96e-07	----?++-+++++-++?++???++++-++--+-+++---++++-------+--+-+-+---+-+-++-+++++-++	59.289	70	0.8156	300010
1	69340693	rs11588339	A	G	0.0065	5.064	4.107e-07	----?++-+++++-++?++???++++-++--+-+++---++++-------+--+-+-+---+-+-++-+++++-++	59.461	70	0.8113	300010
1	69341380	rs55873617	T	C	0.0065	5.066	4.064e-07	----?++-+++++-++?++???++++-++--+-+++---++++-------+--+-+-+---+-+-++-+++++-++	59.509	70	0.8101	300010
1	69341421	rs55950045	T	C	0.0065	5.08	3.776e-07	----?++-+++++-++?++???++++-++--+-+++---++++-------+--+-+-+---+-+-++-+++++-++	59.832	70	0.8017	300010
1	69341592	rs10789275	A	C	0.0064	-4.898	9.7e-07	++++?--+--+--+--?--???-------++-+---+++----+++++++-++-+-+-+++-+-+--+---+-+--	59.764	70	0.8035	300010
1	69347850	rs11209362	A	C	0.0069	-5.01	5.443e-07	++++?--+-----+--?--???-------++-+---+++----+++++++-++-+-+-+++-+-+-++-----+--	58.068	70	0.8449	300010
1	69348545	rs11576549	T	G	0.0067	-5.031	4.885e-07	++++?--+-----+--?--???-------++-+---+++----+++++++-++-+-+-+++-+-+--+-----+--	59.832	70	0.8017	300010
1	69348956	rs55815583	T	C	0.0066	5.05	4.407e-07	----?++-+++++-++?++???+++++++--+-+++---++++-------+--+-+-+---+-+-++-+++++-++	59.55	70	0.809	300010
1	69350330	rs72680464	A	G	0.0066	-4.908	9.208e-07	++++?--+-----+--?--???-------++-+---+++----+++++++-++-+-+-+++-+-+-++-----+--	58.996	70	0.8229	300010
1	69350425	rs72680465	A	C	0.0065	4.939	7.86e-07	----?++-+++++-++?++???+++++++--+-+++---++++-------+--+-+-+---+-+-+--+++++-++	57.947	70	0.8477	300010
1	69350576	rs72680466	A	C	0.0065	-4.906	9.312e-07	++++?--+-----+--?--???-------++-+---+++----+++++++-++-+-+-+++-+-+-++-----+--	58.394	70	0.8374	300010
1	69350993	rs72680467	A	G	0.0065	-4.933	8.08e-07	++++?--+-----+--?--???-------++-+---+++----+++++++-++-+-+-+++-+-+-++-----+--	58.032	70	0.8458	300010
1	69351205	rs4326670	T	C	0.0065	-4.9	9.581e-07	++++?--+-----+--?--???-------++-+---+++----+++++++-++-+-+-+++-+-+-++-----+--	58.404	70	0.8372	300010
1	69351540	rs57003411	C	G	0.0065	4.933	8.108e-07	----?++-+++++-++?++???+++++++--+-+++---++++-------+--+-+-+---+-+-+--+++++-++	57.924	70	0.8482	300010
1	69351782	rs61649525	T	C	0.0066	4.929	8.264e-07	----?++-+++++-++?++???+++++++--+-+++---++++-------+--+-+-+---+-+-+--+++++-++	57.904	70	0.8486	300010
1	69352300	rs4344368	T	C	0.0067	-5.01	5.436e-07	++++?--+-----+--?--???-------++-+---+++----+++++++-++-+-+-+++-+-+--+-----+--	59.262	70	0.8163	300010
1	69352545	rs72680472	C	G	0.0066	4.933	8.106e-07	----?++-+++++-++?++???+++++++--+-+++---++++-------+--+-+-+---+-+-+--+++++-++	57.936	70	0.8479	300010
1	69354053	rs9436854	T	C	0.0064	-4.975	6.534e-07	++++?--+-----+--?--???-------++-+---+++----+++++++-++-+-+-+++-+-+-++-----+--	57.749	70	0.8521	300010
1	69354204	rs9436855	T	C	0.0064	-4.957	7.149e-07	++++?--+-----+--?--???-------++-+---+++----+++++++-++-+-+-+++-+-+-++-----+--	57.691	70	0.8534	300010
1	69354742	rs9436417	T	C	0.0065	-5.001	5.716e-07	++++?--+-----+--?--???-------++-+---+++----+++++++-++-+-+-+++-+-+-++-----+--	58.055	70	0.8452	300010
1	69355011	rs28599531	T	C	0.0066	-4.957	7.172e-07	++++?--+-----+--?--???-------++-+---+++----+++++++-++-+-+-+++-+-+-++-----+--	57.387	70	0.86	300010
1	69355291	rs72680475	A	G	0.0069	4.955	7.242e-07	----?++-+++++-++?++???+++++++--+-+++---++++-------+--+-+++---+-+-+--+++++-++	57.728	70	0.8526	300010
1	69355305	rs58102432	T	C	0.0069	4.946	7.561e-07	----?++-+++++-++?++???+++++++--+-+++---++++-------+--+-+++---+-+-+--+++++-++	57.621	70	0.855	300010
1	69356272	rs6588341	A	G	0.0064	-4.969	6.732e-07	++++?--+-----+--?--???-------++-+---+++----+++++++-++-+---+++-+-+-++-----+--	56.16	70	0.8849	300010
1	69357436	rs11801354	T	C	0.0069	-4.963	6.956e-07	++++?--+-----+--?--???-------++-+---+++----+++++++-++-+---+++-+-+-++-----+--	56.847	70	0.8713	300010
1	69358156	rs11801756	T	C	0.0069	-4.98	6.361e-07	++++?--+-----+--?--???-------++-+---+++----+++++++-++-+---+++-+-+-++-----+--	56.472	70	0.8788	300010
1	69359009	rs11803723	A	T	0.0069	-4.973	6.584e-07	++++?--+-----+--?--???-------++-+---+++----+++++++-++-+---+++-+-+-++-----+--	56.588	70	0.8766	300010
1	69359401	rs60344420	A	T	0.0069	4.977	6.45e-07	----?++-+++++-++?++???+++++++--+-+++---++++-------+--+-+++---+-+-+--+++++-++	56.545	70	0.8774	300010
1	69359943	rs10889791	T	C	0.0201	-4.804	1.558e-06	++++?--+---+-+--?--???----?--++-+---+++-+--+++++++-++-+-+-+++++-+-++--+--+--	60.463	69	0.7586	297444
1	69360472	rs115874825	T	C	0.0072	-5.074	3.889e-07	++++?--+-----+--?--???-------++-+---+++----+++++++-++-+---+++-+-+--+-----+--	58.315	70	0.8392	300010
1	69360987	rs75630536	A	T	0.0073	5.067	4.049e-07	----?++-+++++-++?++???+++++++--+-+++---++++-------+--+-+-+---+-+-+--+++++-++	56.411	70	0.88	300010
1	69361377	rs143372870	A	G	0.0072	5.081	3.763e-07	----?++-+++++-++?++???+++++++0-+-+++---++++-------+--+-+++---+-+-++-+++++-++	58.685	70	0.8305	300010
1	69361508	rs145755345	A	G	0.0072	5.078	3.813e-07	----?++-+++++-++?++???+++++++--+-+++---++++-------+--+-+++---+-+-++-+++++-++	57.722	70	0.8527	300010
1	69362524	rs72680478	A	T	0.0072	5.095	3.488e-07	----?++-+++++-++?++???+++++++--+-+++---++++-------+--+-+++---+-+-++-+++++-++	57.84	70	0.8501	300010
1	69363282	rs4617455	A	G	0.0069	5.023	5.074e-07	----?++-+++++-++?++???+++++++--+-+++---++++-------+--+-+++---+-+-+--+++++-++	57.34	70	0.861	300010
1	69364823	rs11802913	A	G	0.0068	4.997	5.815e-07	----?++-+++++-++?++???+++++++--+-+++---++++-------+--+-+++---+-+-+--+++++-++	56.568	70	0.877	300010
1	69364885	rs9436418	T	C	0.0064	4.963	6.955e-07	----?++-+++++-++?++???+++++++--+-+++---++++-------+--+-+++---+-+-+--+++++-++	56.198	70	0.8842	300010
1	69366071	rs11806894	A	T	0.0068	-5.019	5.196e-07	++++?--+-----+--?--???-------++-+---+++----+++++++-++-+---+++-+-+-++-----+--	56.927	70	0.8697	300010
1	69366902	rs72680481	A	G	0.007	5.11	3.219e-07	----?++-+++++-++?++???+++++++--+-+++---++++-------+--+-+++---+-+-++-+++++-++	57.716	70	0.8528	300010
1	69367409	rs11582908	A	G	0.0067	-5.019	5.189e-07	++++?--+-----+--?--???-------++-+---+++----+++++++-++-+---+++-+-+-++-----+--	56.987	70	0.8685	300010
1	69369267	rs72680485	T	G	0.007	5.116	3.121e-07	----?-+-+++++-++?++???+++++++--+-+++---++++-------+--+-+++---+-+-++-+++++-++	58.215	70	0.8416	300010
1	69369473	rs11809118	T	C	0.0067	4.998	5.785e-07	----?-+++++++-++?++???+++++++--+-+++---++++-------+--+-+++---+-+-+--+++++-++	56.602	70	0.8763	300010
1	69369837	rs7551318	T	G	0.0064	-4.922	8.559e-07	++++?--------+--?--???-------++-+---+++----+++++++-++-+---+++-+-+-++-----+--	55.823	70	0.8912	300010
1	69371516	rs72680486	A	G	0.0067	-5.084	3.689e-07	++++?+-------+--?--???-------++-+---+++----+++++++-++-+---+++-+-+-++-----+--	56.596	70	0.8764	300010
1	69371555	rs72680487	A	T	0.0071	-5.106	3.297e-07	++++?+-+-----+--?--???-------++-+---+++----+++++++-++-+---+++-+-+--+-----+--	57.98	70	0.8469	300010
1	69377135	rs6658623	T	C	0.0072	5.425	5.798e-08	----?-+++++++-++?++???+++++++--+-+++---++++-------+--+-+-+---+-+-+--+++++-++	59.777	70	0.8032	300010
1	69378002	rs58815715	A	G	0.0064	5.311	1.087e-07	----?-+++++++-++?++???+++++++--+-+++---++++-------+--+-+++---+-+-+--+++++-++	57.852	70	0.8498	300010
1	69378459	rs72680492	C	G	0.007	-5.352	8.683e-08	++++?+-------+--?--???-------++-+---+++----+++++++-++-+---+++-+-+--+-----+--	58.27	70	0.8403	300010
1	69378487	rs6662460	A	C	0.0065	5.323	1.023e-07	----?-+++++++-++?++???+++++++--+-+++---++++-------+--+-+++---+-+-+--+++++-++	58.946	70	0.8242	300010
1	69378554	rs6662550	T	C	0.0065	5.316	1.06e-07	----?-+++++++-++?++???+++++++--+-+++---++++-------+--+-+++---+-+-+--+++++-++	57.946	70	0.8477	300010
1	69379658	rs72680493	C	G	0.0065	5.318	1.047e-07	----?-+++++++-++?++???+++++++--+-+++---++++-------+--+-+++---+-+-+--+++++-++	57.417	70	0.8594	300010
1	69379892	rs9804111	A	G	0.0069	5.384	7.266e-08	----?-+++++++-++?++???+++++++--+-+++---++++-------+--+-+++---+-+-++-+++++-++	58.13	70	0.8435	300010
1	69380983	rs4328112	A	G	0.0069	-5.369	7.902e-08	++++?+-------+--?--???-------++-+---+++----+++++++-++-+---+++-+-+--+-----+--	58.222	70	0.8414	300010
1	69381135	rs4539178	C	G	0.0065	5.323	1.021e-07	----?-+++++++-++?++???+++++++--+-+++---++++-------+--+-+++---+-+-+--+++++-++	57.432	70	0.8591	300010
1	69382976	rs56026859	A	G	0.0065	5.345	9.062e-08	----?-+++++++-++?++???+++++++--+-+++---++++-------+--+-+++---+-+-+--+++++-++	58.334	70	0.8388	300010
1	69383918	rs72680496	T	C	0.0065	-5.321	1.032e-07	++++?+-------+--?--???-------++-+---+++----+++++++-++-+---+++-+-+-++-----+--	58.185	70	0.8423	300010
1	69384518	rs4420133	C	G	0.0065	5.295	1.188e-07	----?-+++++++-++?++???+++++++--+-+++---++++-------+--+-+++---+-+-+--+++++-++	58.222	70	0.8414	300010
1	69386730	rs10127680	T	C	0.0065	5.359	8.383e-08	----?-+++++++-++?++???+++++++--+-+++---++++-------+--+-+++---+-+-+--+++++-++	58.391	70	0.8375	300010
1	69387823	rs9629020	A	T	0.0066	-5.381	7.403e-08	++++?+-------+--?--???-------++-+---+++----+++++++-++-+---+++-+-+-++-----+--	58.673	70	0.8308	300010
1	69388905	rs9629013	A	G	0.0065	-5.334	9.601e-08	++++?+-------+--?--???-------++-+---+++----+++++++-++-+---+++-+-+-++-----+--	58.163	70	0.8428	300010
1	69389242	rs6682095	C	G	0.007	5.414	6.179e-08	----?-+++++++-++?++???+++++++--+-+++---++++-------+--+-+++---+-+-++-+++++-++	58.812	70	0.8274	300010
1	69389574	rs6682255	C	G	0.0071	-5.291	1.217e-07	++++?+-----+-+--?--???-------++-+---+++----+++++++-++-+---+++-+-+-++-----+--	59.853	70	0.8012	300010
1	69395485	rs72680499	T	C	0.0065	-5.33	9.823e-08	++++?+-------+--?--???-------++-+---+++----+++++++-++-+---+++-+-+-++-----+--	57.937	70	0.8479	300010
1	69399775	rs6662842	T	G	0.0065	-5.341	9.255e-08	++++?+-------+--?--???-------++-+---+++----+++++++-++-+---+++-+-+-++-----+--	58.096	70	0.8443	300010
1	69400432	rs9803974	T	G	0.0069	5.353	8.661e-08	----?-+++++++-++?++???+++++++--+-+++---++++-------+--+-+++---+-+-++-+++++-++	58.51	70	0.8347	300010
1	69400780	rs72682206	A	C	0.0069	-5.412	6.243e-08	++++?+-------+--?--???-------++-+---+++----+++++++-++-+---+++-+-+--+-----+--	58.755	70	0.8288	300010
1	69402457	rs6690346	T	C	0.0063	5.317	1.054e-07	----?-+++++++-++?++???+++++++--+-+++---++++-------+--+-+++---+-+-+--+++++-++	57.31	70	0.8617	300010
1	69403245	rs11801267	A	G	0.0065	-5.327	9.993e-08	++++?+-------+--?--???-------++-+---+++----+++++++-++-+---+++-+-+-++-----+--	58.364	70	0.8381	300010
1	69403582	rs72682209	A	G	0.0069	-5.413	6.196e-08	++++?+-------+--?--???-------++-+---+++----+++++++-++-+---+++-+-+--+-----+--	58.747	70	0.829	300010
1	69403584	rs72682210	A	T	0.0069	-5.427	5.722e-08	++++?+-------+--?--???-------++-+---+++----+++++++-++-+---+++-+-+--+-----+--	58.979	70	0.8233	300010
1	69406043	rs11578193	T	G	0.0065	-5.321	1.034e-07	++++?+-------+--?--???-------++-+---+++----+++++++-++-+---+++-+-+-++-----+--	58.796	70	0.8278	300010
1	69406872	rs72682214	T	C	0.0065	-5.325	1.012e-07	++++?+-------+--?--???-------++-+---+++----+++++++-++-+---+++-+-+-++-----+--	58.793	70	0.8279	300010
1	69408578	rs4317857	T	C	0.007	5.408	6.376e-08	----?-+++++++-++?++???+++++++--+-+++---++++-------+--+-+++---+-+-++-+++++-++	59.048	70	0.8216	300010
1	69409730	rs72682215	T	C	0.0065	-5.351	8.737e-08	++++?+-------+--?--???-------++-+---+++----+++++++-++-+---+++-+-+-++-----+--	58.756	70	0.8288	300010
1	69410530	rs10047248	T	G	0.0065	5.353	8.665e-08	----?-+++++++-++?++???+++++++--+-+++---++++-------+--+-+++---+-+-+--+++++-++	58.689	70	0.8304	300010
1	69411095	rs11209370	A	G	0.0065	5.334	9.596e-08	----?-+++++++-++?++???+++++++--+-+++---++++-------+--+-+++---+-+-+--+++++-++	58.493	70	0.8351	300010
1	69411330	rs72682218	A	C	0.0069	5.395	6.863e-08	----?-+++++++-++?++???+++++++--+-+++---++++-------+--+-+++---+-+-++-+++++-++	59.15	70	0.8191	300010
1	69412517	rs4390220	A	C	0.0065	5.349	8.851e-08	----?-+++++++-++?++???+++++++--+-+++---++++-------+--+-+++---+-+-+--+++++-++	58.886	70	0.8256	300010
1	69412689	rs6658033	T	C	0.0065	5.365	8.1e-08	----?-+++++++-++?++???+++++++--+-+++---++++-------+--+-+++---+-+-+--+++++-++	58.605	70	0.8324	300010
1	69412716	rs6658121	T	C	0.0065	5.349	8.854e-08	----?-+++++++-++?++???+++++++--+-+++---++++-------+--+-+++---+-+-+--+++++-++	58.67	70	0.8309	300010
1	69412732	rs10047054	T	C	0.0069	5.408	6.368e-08	----?-+++++++-++?++???+++++++--+-+++---++++-------+--+-+++---+-+-++-+++++-++	59.171	70	0.8186	300010
1	69413111	rs6673849	T	C	0.0065	-5.352	8.712e-08	++++?+-------+--?--???-------++-+---+++----+++++++-++-+---+++-+-+-++-----+--	58.456	70	0.8359	300010
1	69415213	rs11804299	A	G	0.0065	-5.334	9.613e-08	++++?+-------+--?--???-------++-+---+++----+++++++-++-+---+++-+-+-++-----+--	58.554	70	0.8336	300010
1	69415465	rs4484966	A	G	0.0065	5.365	8.088e-08	----?-+++++++-++?++???+++++++--+-+++---++++-------+--+-+++---+-+-+--+++++-++	58.077	70	0.8447	300010
1	69416180	rs9436863	A	C	0.0065	-5.416	6.078e-08	++++?+-------+--?--???-------++-+---+++----+++++++-++-+-+-+++-+-+-++-----+--	55.555	70	0.896	300010
1	69417310	rs11802814	A	G	0.0065	-5.333	9.663e-08	++++?+-------+--?--???-------++-+---+++----+++++++-++-+---+++-+-+-++-----+--	57.724	70	0.8527	300010
1	69418123	rs72682222	A	G	0.0071	-5.248	1.54e-07	++++?+-+-----+--?--???-------++-+---+++----+++++++-++-+---+++-+-+-++-----+--	59.014	70	0.8225	300010
1	69419136	rs13375505	T	C	0.0064	5.35	8.794e-08	----?-+++++++-++?++???+++++++--+-+++---++++-------+--+-+++---+-+-++-+++++-++	58.455	70	0.836	300010
1	69420375	rs4301671	A	T	0.0066	-5.286	1.249e-07	++++?+-------+--?--???-------++-+---+++----+++++++-++-+---+++-+-+--+-----+--	57.071	70	0.8667	300010
1	69421826	rs1396022	A	G	0.0065	-5.298	1.173e-07	++++?+----+--+--?--???-------++-+---+++----+++++++-++-+---+++-+-+--+-----+--	57.16	70	0.8649	300010
1	69422680	rs1507858	T	C	0.0069	5.217	1.818e-07	----?-+++++++-++?++???+++++++--+-+++---++++-------+--+-+-+---+-+-++-++-++-++	56.673	70	0.8748	300010
1	69423415	rs12087596	T	C	0.0065	-5.34	9.306e-08	++++?+-------+--?--???-------++-+---+++----+++++++-++-+---+++-+-+--+-----+--	57.609	70	0.8552	300010
1	69423725	rs4649904	A	G	0.0065	-5.334	9.589e-08	++++?+-------+--?--???-------++-+---+++----+++++++-++-+---+++-+-+--+-----+--	57.543	70	0.8567	300010
1	69424337	rs1507855	A	G	0.0065	-5.357	8.439e-08	++++?+-------+--?--???-------++-+---+++----+++++++-++-+---+++-+-+--+-----+--	57.459	70	0.8585	300010
1	69424724	rs72682228	T	G	0.0066	5.446	5.163e-08	----?-+++++++-++?++???++++++++-+-+++---++++-------+--+-+++---+-+-++-+++++-++	59.44	70	0.8118	300010
1	69430200	rs9436422	T	C	0.0052	4.749	2.04e-06	----?-++++-+--+-?++???+++-++++-+-+++-----++-------+----+-+---+++-++-+--?+--+	64.142	69	0.643	299834
1	69430915	rs994176	T	C	0.0054	-4.645	3.399e-06	++++?+----++++-+?--???---+----+-+---+++++--+++++++-++++-+-+++---+--+--+?-++-	63.508	69	0.664	299834
1	69431150	rs9436423	C	G	0.0051	-4.633	3.613e-06	++++?+----++++-+?--???---+----+-+---+++++--+++++++-++++-+-+++---+--+--+?-++-	64.33	69	0.6367	299834
1	69431362	rs13375469	A	G	0.0054	-4.625	3.743e-06	+++-?+----+-++-+?--???---+----+-+---+++++--+++++++-++++-+-+++---+--+-++?-++-	63.646	69	0.6595	299834
1	69432044	rs1022013	A	G	0.0063	-5.428	5.709e-08	++++?+-------+--?--???--------+-+---+++----+++++++-++-+---+++-+-+--+-----+--	57.889	70	0.849	300010
1	69432704	rs116109100	A	G	0.0054	4.649	3.337e-06	----?-++++-+--+-?++???+++-++++-+-+++-----++-------+----+-+---+++-++-+--?+--+	64.442	69	0.633	299834
1	69432836	rs114927020	A	G	0.0051	4.664	3.099e-06	----?-++++----+-?++???+++-++++-+-+++-----++-------+----+-+---+++-++-+--?+--+	66.417	69	0.5658	299834
1	69433435	rs6669357	A	G	0.0065	5.36	8.33e-08	----?-+++++-+-++?++???++++++++-+-+++---++++-------+--+-+-+---+++-++-+++++-++	59.525	70	0.8097	300010
1	69438130	rs4313445	T	C	0.005	4.588	4.475e-06	----?-++++----+-?++???+++-++++-+-+++-----++-------+----+-+---+++-++-+--?+--+	66.529	69	0.562	299834
1	69441920	rs2048156	A	C	0.0091	4.677	2.908e-06	+--+--++-+-+--?+-++++++++-??+----+++----++++-+-++-++++-+++---++-+---++--++++	82.909	72	0.1783	291318
1	70645350	rs527331373	T	G	0.0004	4.496	6.908e-06	????????+????????????????????????+??????????????????????????????????+???++++	5.432	6	0.4897	203935
1	72030932	rs1517752	T	C	0.0107	-4.432	9.349e-06	+--+--------++-+---+--+++++-++-++-+-+-+-+--++-+-+-----+++----+----++--------	61.214	75	0.8745	300486
1	72031176	rs4649941	A	G	0.011	4.421	9.823e-06	-++-+++++++---+-+++--+--+--+-++--+-+-+-+-0++---+-+++++---++++-++++--++++++++	57.143	75	0.9379	300486
1	72031282	rs6668345	C	G	0.0107	4.436	9.155e-06	-++-++++++++--+-+++-++-----+--+--+-+-+-+-++--0-+-+++++---++++-++++--++++++++	61.438	75	0.8701	300486
1	72031668	rs1335224	T	C	0.0106	4.438	9.086e-06	-++-++++++++--+-+++-++-----+--+--+-+-+-+-++--0-+-+++++---++++-++++--++++++++	61.359	75	0.8716	300486
1	72032582	rs951950	T	C	0.0107	-4.446	8.743e-06	+--+--------++-+---+--+++++-++-++-+-+-+-+--++0+-+-----+++----+----++--------	61.584	75	0.8672	300486
1	72034030	rs1333998	A	T	0.0113	-4.607	4.093e-06	+--+--------++-+---+--+++++-++-++-+-+-+-++-++++++-----+++----+----++--------	64.066	75	0.8119	300486
1	72034058	rs1333999	C	G	0.0113	4.614	3.952e-06	-++-++++++++--+-+++-++-----+--+--+-+-+-+--+------+++++---++++-++++--++++++++	64.055	75	0.8122	300486
1	72034252	rs1334000	A	C	0.0113	-4.606	4.109e-06	+--+--------++-+---+--+++++-++-++-+-+-+-++-++++++-----+++----+----++--------	64.011	75	0.8133	300486
1	72034399	rs1334001	C	G	0.0113	-4.598	4.263e-06	+--+--------++-+---+--+++++-++-++-+-+-+-++-++++++-----+++----+----++--------	63.94	75	0.815	300486
1	72034696	rs12021677	T	C	0.011	4.652	3.282e-06	-++-+++++++---+-+++--+-++--+-----+-+-+-+--++---+-+++++---++++-++++--++++++++	60.305	75	0.8912	300486
1	72034921	rs6424431	A	G	0.0112	-4.61	4.036e-06	+--+--------++-+---+--+++++-++-++-+-+-+-++--+++++-----+++----+----++--------	64.356	75	0.8048	300486
1	72035078	rs6424432	A	T	0.0113	-4.579	4.665e-06	+--+--------++-+---+--+++++-++-++-+-+-+-++--+++-+-----+++----+----++--------	64.541	75	0.8001	300486
1	72035165	rs7553565	A	G	0.0112	-4.633	3.598e-06	+--+--------++-+---+--+++++-++-++-+-+-+-++--+++++-----+++----+----++--------	64.326	75	0.8055	300486
1	72036427	rs6424433	T	C	0.0113	4.587	4.499e-06	-++-++++++++--+-+++-++-----+--+--+-+-+-+--+------+++++---++++-++++--++++++++	63.914	75	0.8156	300486
1	72036632	rs6656539	A	T	0.0113	-4.59	4.44e-06	+--+--------++-+---+--+++++-++-++-+-+-+-++-++++++-----+++----+----++--------	63.841	75	0.8174	300486
1	72038489	rs12139658	T	G	0.0109	-4.613	3.969e-06	+-++--------++-+---+--++-++-++-++-+-+-+-++--+++++-----+++----+----++--------	65.496	75	0.7753	300486
1	72038497	rs1335223	T	C	0.011	4.691	2.725e-06	-+--++++++++--+-+++-++--+--+--+--+-+?+-+--+------++-++---++++-++++--++++++++	64.281	74	0.7827	298560
1	72038947	rs1213521	A	T	0.0113	4.704	2.548e-06	-+--++++++++--+-+++-++--+--+--+--+-+-+-+--+------+++++--+++++-++++--++++++++	65.193	75	0.7833	300486
1	72040624	rs12757106	A	G	0.011	4.707	2.517e-06	-+--++++++++--+-+++-++--+--+--+--+-+-+-+--++---+-+++++--+++++-++++--++++++++	66.442	75	0.7493	300486
1	72045626	rs10889921	T	C	0.0106	4.691	2.714e-06	-+--+++++++---+-+++--+-++--+-----+-+-+-+--++-----+++++---++++-++++--++++++++	60.063	75	0.8955	300486
1	72046723	rs2184232	T	C	0.0108	4.763	1.91e-06	-+--+++++++---+-+++--+-++--+-----+-+-+-+--++---+-+++++---++++-++++--++++++++	60.524	75	0.8873	300486
1	72061816	rs1855647	A	G	0.0128	4.718	2.387e-06	-+--+++++++---+-+++-++-++--+--+--+-+-+-+--+------+++++--+++++-++++--++++++++	64.178	75	0.8092	300486
1	72062878	rs12742274	A	T	0.0113	-4.845	1.265e-06	+-++--------++-+---+--++-+--++-++-+-+-+-++--+++-+-----++-----+----++--------	65.865	75	0.7653	300486
1	72063310	rs12564885	A	T	0.0114	4.878	1.073e-06	-+--+++++++---+-+++--+-++--+-----+-+-+-+--++----+++-++---++++-++++--++++++++	60.293	75	0.8914	300486
1	72066623	rs11209800	A	G	0.0128	-4.714	2.424e-06	+-++-------+++-+---+--+--++-++-++-+-+-+-++-++0+++------+-----+----++--------	63.371	75	0.8285	300486
1	72067202	rs11209801	A	G	0.0112	4.77	1.846e-06	-+--+++++++---+-+++--+-++--+-----+-+-+----++---+++++++---++++-++++--++++++++	61.346	75	0.8719	300486
1	72070767	rs12757229	A	G	0.0111	4.76	1.937e-06	-+--+++++++---+-+++-++-+++++--+--+-+-+-+--++---+-+++++--+++++-++++--++++++++	65.315	75	0.7801	300486
1	72071129	rs10493485	A	T	0.0112	4.676	2.928e-06	-+--+++-+++---+-+++--+-++--+-----+-+-+-+--++----++++++---++++-++++--++++++++	61.37	75	0.8714	300486
1	72074998	rs12744231	A	G	0.0099	-4.493	7.029e-06	+-++---+----++-+---+--+-++--++-++-+-+-+-++--++++------+++----+----++--------	66.289	75	0.7536	300486
1	72077549	rs928615	T	G	0.0104	-4.508	6.552e-06	+-++---+----++-+---+--+-+++-++-++-+-+-+-++--+++++-----++-----+----++--------	65.462	75	0.7762	300486
1	72080604	rs1762732	T	C	0.0099	4.646	3.391e-06	-+--+++-++++--+--++--+-+++-++---++++-+-++-+------+-++++-+++++-++++--++++++++	77.828	75	0.3888	300486
1	72513118	rs1905977	A	T	0.0136	4.569	4.898e-06	+-+--+-++-++-+++------+-++---+-+-+--+++++++++++++------++++--+-+--+----+++++	89.818	75	0.1166	300486
1	72513186	rs1905976	T	G	0.0139	4.532	5.842e-06	+-+--+-++-+--+++------+--+---+-+-+--+++++++++++++----+-++++--+-+--+----+++++	90.652	75	0.1053	300486
1	72514701	rs2422134	C	G	0.0129	-4.475	7.65e-06	-+-++-+--+--+---++++++-++-+++-+-+-++--+----------++++-+----++-+-++--+++-----	88.967	75	0.1292	300486
1	72514896	rs6699175	T	C	0.0056	4.97	6.695e-07	-+--?+-+?-+---+-??+-?-++++?----+++-+++-+++-++++---?--+--+++-?-+-++-----+++++	61.898	67	0.6534	286406
1	72516076	rs1026999	T	C	0.0133	-4.505	6.625e-06	-+-++-+--+--+---++++++-++-+++-+-+-++--+----------++++-+----++-+-++--+++-----	89.282	75	0.1244	300486
1	72516080	rs1026998	T	G	0.0134	-4.502	6.72e-06	-+-++-+--+--+---++++++-++-+++-+-+-++--+----------++++-+----++-+-++--+++-----	89.389	75	0.1229	300486
1	72516287	rs1026997	T	C	0.0134	4.521	6.142e-06	+-+--+-++-++-+++------+-++---+-+-+--++-++++++++++----+-++++--+-+--++---+++++	90.158	75	0.1119	300486
1	72517082	rs6657634	T	C	0.0133	-4.518	6.23e-06	-+-++-+--+--+---++++++-++-+++-+-+-++--+----------++++-+----++-+-++--+++-----	89.296	75	0.1242	300486
1	72517987	rs17580974	C	G	0.0138	-4.526	6.012e-06	-+-++-+--+-++---++++++-+--+++-+-+-++--+----------++++-+----++-+-++--+++-----	89.931	75	0.1151	300486
1	72518170	rs12074700	A	G	0.0133	4.516	6.302e-06	+-+--+-++-++-+++------+-++---+-+-+--++-++++++++++----+-++++--+-+--++---+++++	89.254	75	0.1249	300486
1	72518420	rs12354124	A	T	0.0133	4.515	6.329e-06	+-+--+-++-++-+++------+-++---+-+-+--++-++++++++++----+-++++--+-+--++---+++++	89.401	75	0.1227	300486
1	72527374	rs2046504	A	G	0.0131	4.472	7.736e-06	+-+--+-++-+--+++------+-++---+-+-+--++-++++++++++----+-++++--+-+--++---+++++	89.196	75	0.1257	300486
1	72527909	rs1564968	A	G	0.0132	4.486	7.264e-06	+-+--+-++-++-+++------+-++---+-+-+--++-++++++++++----+-++++--+-+--++---+++++	89.102	75	0.1272	300486
1	72528734	rs1486080	T	G	0.013	-4.516	6.299e-06	-+-++-+--+-++---++++++-+--+++-+-+-++--+----------++++-+----++-+-++--+++-----	89.424	75	0.1224	300486
1	72530692	rs1540616	T	C	0.0132	4.494	7.003e-06	+-+--+-++-++-+++------+-++---+-+-+--++-++++++++++----+-++++--+-+--++---+++++	88.861	75	0.1309	300486
1	72531407	rs1159129	A	G	0.0129	4.482	7.386e-06	+-+--+-++-+--+++------+-++---+-+-+--++-++++++++++----+-++++--+-+--++---+++++	88.938	75	0.1297	300486
1	72531473	rs2046503	A	G	0.0135	4.522	6.12e-06	+-+--+-++-+--+++------+-++---+-+-+--++-++++++++++----+-++++--+-+--++---+++++	89.549	75	0.1205	300486
1	72534359	rs1486078	T	C	0.0131	4.487	7.211e-06	+-+--+-++-+--+++------+-++---+-+-+--++-++++++++++----+-++++--+-+--++---+++++	88.285	75	0.14	300486
1	72543338	rs1486108	A	T	0.0134	4.48	7.466e-06	+-+--+-++-++-+++------+-++---+-+-+--++-++++++++++----+-++++--+-+--+----+++++	88.82	75	0.1315	300486
1	72543910	rs7542278	A	G	0.0133	-4.476	7.6e-06	-+-++-+--+--+---++++++-+--+++-+-+-++--+----------++++-+----++-+-++--+++-----	88.916	75	0.13	300486
1	72548617	rs35645202	T	C	0.0134	-4.456	8.337e-06	-+-++-+--+--+---++++++-+--+++-+-+-++--+----------++++-+----++-+-++--+++-----	89.047	75	0.128	300486
1	72549836	rs988421	T	C	0.0134	-4.463	8.094e-06	-+-++-+--+--+---++++++-+--+++-+-+-++--+----------++++-+----++-+-++--+++-----	88.938	75	0.1297	300486
1	72550500	rs11209908	A	T	0.0134	4.46	8.2e-06	+-+--+-++-++-+++------+-++---+-+-+--++-++++++++++----+-++++--+-+--++---+++++	89.07	75	0.1276	300486
1	72553891	rs12085418	T	G	0.0134	-4.437	9.108e-06	-+-++-+--+--+---++++++-+--+++-+-+-++--+----------++++-+----++-+-++--+++-----	89.669	75	0.1188	300486
1	72553991	rs12091740	T	C	0.0132	4.456	8.338e-06	+-+--+-++-+--+++------+-++---+-+-+--++-++++++++++----+-++++--+-+--++---+++++	90.288	75	0.1101	300486
1	72554833	rs7541651	A	T	0.0132	-4.534	5.78e-06	-+-++-+--+-++----+++++-+--+++-+-+-++-------------+?++-+----++-+-++--+++-----	87.059	74	0.1423	300049
1	72604495	rs114846087	A	T	0.0052	-4.693	2.697e-06	---????+--?-?--??-????-?--??+-+---+-+-?++--?+--++-?---?---+??--+?++----?-+--	60.903	52	0.1861	286404
1	72621463	rs12124523	T	C	0.007	5.382	7.367e-08	++--?+-+?-+---+-?-+-?-++++-?---+++-+++-++-+++++--+?--+--+++??-+-+-+---++++++	61.911	67	0.653	284949
1	72634912	rs1157072	A	G	0.0057	-5.082	3.741e-07	--+??-?-?+-+-+-+?++???+?--+?-++---+---+--++?---++-?++++-+--??+++?+-+-+-?----	71.83	59	0.1219	282662
1	72717743	rs1776012	A	G	0.0152	5.256	1.476e-07	--+--++++-+-+++-+-+---+--+++-+-+-+---+++++-+++++--++-+-+++---+--+-+--+--++++	83.014	75	0.2462	300486
1	72725344	rs9424977	T	C	0.0149	5.289	1.231e-07	--+--++++-+++++-+-+---+--+++-+-+-+---+++++-+++++--++-+-+++---+--+-+--+--++++	83.612	75	0.2321	300486
1	72732574	rs1460948	A	G	0.011	-4.422	9.79e-06	++--+--+++-+--++-+-+++-++-----+---+-+-+---+-+---++--+-+---++---++++++--+----	79.183	75	0.3484	300486
1	72733841	rs1380995	A	T	0.015	5.278	1.31e-07	--+--++++-+++++-+-+---+--+++-+-+-+---+++++-+++++--++-+-+++-+-+--+-+--+--++++	81.765	75	0.2774	300486
1	72735458	rs12137231	T	C	0.0146	5.208	1.905e-07	--+--++++-+++++-+-+---++-+++-+-+-+---+++++-+++++--++-+-+++-+-+--+-+--+--++++	83.141	75	0.2432	300486
1	72740634	rs7549792	A	G	0.0149	-5.289	1.227e-07	++-++----+-----+-+-+++-++---+-+-+-+++-----+------+--+-+---+-+-++-+-++-+0----	82.66	75	0.2548	300486
1	72741829	rs11584611	T	C	0.0148	5.271	1.355e-07	--+--++++-+++++-+-+---+--+++-+-+-+---+++++-++++++-++-+-+++-+-+--+-+--+--++++	82.882	75	0.2494	300486
1	72742235	rs9425081	T	G	0.0149	-5.275	1.328e-07	++-++----+-----+-+-+++-++---+-+-+-+++-----+------+--+-+---+-+-++-+-++-+0----	82.799	75	0.2514	300486
1	72744144	rs3101340	A	G	0.0149	-5.267	1.386e-07	++-++----+-----+-+-+++-++---+-+-+-+++-----+------+--+-+---+-+-++-+-++-+0----	82.551	75	0.2575	300486
1	72744996	rs1870676	T	C	0.0152	-5.28	1.294e-07	++-++----+-----+-+-+++-++---+-+-+-+++-----+-----+---+-+---+-+-++-+-++-++----	82.362	75	0.2622	300486
1	72747844	rs3101341	T	C	0.015	5.372	7.771e-08	--+-+++++-+++++-+-+---+--+++-+-+-+-+-+++++-++++---++-+-+++-+-+--+-+--+-0++++	78.556	75	0.3669	300486
1	72829015	rs115720372	T	G	0.0082	4.622	3.795e-06	++-??+?-+-+++++-?+????+?++??-+--++-+-+---+++-++--+++++-+++-??++-+--+-++?++++	88.703	61	0.0118	290845
1	72882463	rs115335794	T	C	0.006	-4.745	2.087e-06	---??-?+----?--+?-????-?-+??+-+-----+-?++--?+---++?---?---+??--+?+?-+-+?--+-	86.157	54	0.003532	287773
1	72904288	rs12724444	A	G	0.0056	5.373	7.765e-08	???+?+???-+-++?+??+??--+++??---+-+--++-++--++++--+?+-+--+++??????-+-+?-+++++	55.542	53	0.3792	263230
1	72919499	rs75593079	C	G	0.0059	5.211	1.88e-07	?????+???-+-+-?+??+???+?+???+--+-+-+++-++--?++++-+?+---+-++???--?-+-+?+?++++	50.808	49	0.4022	265406
1	72932974	rs12134405	T	G	0.0086	4.453	8.486e-06	++-??+?-+-+++++-?+????+?-+??-+-+++++-+---+++-+++-+++++-+++-??-+-+--+-++?++++	92.803	61	0.005393	290845
1	73187836	rs77483376	A	G	0.0064	-4.452	8.495e-06	?????-???+?-?+?-??+???-?--??-+--+-+---+--++++--+--?+-+++?????????+-+-?-?----	41.255	44	0.59	257391
1	76511628	rs6704184	T	C	0.0143	4.498	6.869e-06	+++??-++?+?-+-+-?+???????--+-??+-+-?-+?++?????????+-????++-+-+---????--?++-+	43.951	41	0.3477	250826
1	83714597	rs144454688	A	C	0.0038	4.5	6.801e-06	?????????+-+??????????+?--??+++?-+???+?-++--++++--?-++?--+?????????++???++++	29.661	34	0.6803	251991
1	84260626	rs12144970	A	G	0.0147	-4.438	9.062e-06	+-+++--+---+--+-+-+--++-----+-+---++----+--+--++++-+--+--++--+--++++--+---+-	75.081	75	0.4757	300486
1	84267113	rs2007415	A	C	0.0136	4.746	2.07e-06	-+---++++++-++-+-++++-++++++++-+++--++++-++-++----+-+--++--++-++----++++++-+	69.239	75	0.6657	300486
1	84268628	rs7551130	A	G	0.0135	-4.666	3.069e-06	+-+++------+--+-+----+--------+---++----+--+--++++-+-++--++--+--++++------+-	68.542	75	0.6874	300486
1	84269299	rs4140462	A	G	0.0135	-4.751	2.024e-06	+-+++------+--+-+----++-------+---++----+--+--++++-+-++--++--+--++++------+-	69.991	75	0.6419	300486
1	84270215	rs12116654	A	T	0.0135	4.77	1.844e-06	-+---++++++-++-+-++++-++++++++-+++--++++-++-++----+-+--++--++-++----++++++-+	69.36	75	0.6619	300486
1	84273341	rs6576949	A	C	0.0131	4.828	1.379e-06	++---++++++-++-+-++++-++++++++-+++--++++-++-+++---+?+--++--++-++----++++++-+	71.315	74	0.5669	298932
1	84276429	rs6676587	T	C	0.0139	4.743	2.103e-06	-+---++++++-++-+-+-++--+++++++-+++-+++++-++-++++--+-+--++--++-++----++++++-+	69.845	75	0.6466	300486
1	84278911	rs1830827	T	C	0.0135	-4.616	3.907e-06	+-+++------+--+-+-+--+--------+---++----+--+--++++-+--+--++--+--++++------+-	71.284	75	0.6002	300486
1	84278976	rs1408476	T	C	0.0135	-4.635	3.572e-06	+-+++------+--+-+-+--+--------+---++----+--+--++++-+--+--++--+--++++------+-	71.421	75	0.5957	300486
1	84279785	rs1830825	A	G	0.0135	-4.641	3.471e-06	+-+++------+--+-+-+--+--------+---++----+--+--++++-+--+--++--+--++++------+-	72.108	75	0.5732	300486
1	84281197	rs11163849	A	G	0.0135	4.812	1.491e-06	-++--++++++-++---+-++-++++++-+-+++--++++-++-++----+-+++++--++-++----++-+++-+	76.054	75	0.4443	300486
1	84283317	rs6680860	A	G	0.0134	-4.649	3.341e-06	+-+++------+--+-+-+--+--------+---++----+--+--++++-+--+--++--+--++++------+-	72.369	75	0.5647	300486
1	84285240	rs4001466	A	G	0.0134	4.647	3.376e-06	-+---++++++-++-+-+-++-++++++++-+++--++++-++-++----+-++-++--++-++----++++++-+	70.748	75	0.6176	300486
1	84287850	rs6696585	A	T	0.0142	-4.597	4.285e-06	+-+++------+--+-+-+--+--------+---++----+--+--++++-+--+--++--+--++++------+-	73.123	75	0.5398	300486
1	84293113	rs12135529	T	C	0.0141	-4.535	5.768e-06	+-+++------+--+-+-+--+--------+---++----+--+--++++-+--+--++--+--++++------+-	71.299	75	0.5997	300486
1	84296056	rs910180	T	C	0.0159	4.786	1.702e-06	-++--+++++---+-++++++-+-++++-+-+++---+++-++-+++---++---++-+---++--+-++--+--+	75.208	75	0.4715	300486
1	84296602	rs970458	T	C	0.0156	4.71	2.48e-06	-++--+++++---+-++++++-+-++++-+-+++---+++-++-+++---++-+0-+-+---++--++++--+--+	74.717	75	0.4875	300486
1	84296722	rs970459	A	G	0.0157	-4.824	1.407e-06	+--++-----+++-+------+-+----+-+---+++---+--+---+++--+-+--+-+++--++-+--++-++-	73.975	75	0.5118	300486
1	84298457	rs12406928	T	G	0.0137	-4.704	2.549e-06	+--++--+---+--+++-+--+------+-+---++----+--+--++++-+-----++??+--++++--+---+-	76.667	73	0.3619	299096
1	84303560	rs11163856	A	G	0.0155	4.864	1.152e-06	-++--++++++--+-++++++-+-++++-+-+++---+++-++++++---++-+-++-+-+-++--+-++--+--+	73.268	75	0.535	300486
1	84310193	rs12134669	T	G	0.0131	-4.806	1.539e-06	+--++------+--+-+-+--+------+-+---++----+--+---+++-+-----++--+--++++--+--++-	78.521	75	0.3679	300486
1	84311412	rs2296257	A	G	0.0131	4.836	1.324e-06	-++--++++++-++-+-+-++-++++++-+-+++--++++-++-+++---+-+++++--++-++----++-++--+	78.805	75	0.3595	300486
1	84317085	rs12139301	T	C	0.0131	5.085	3.667e-07	-++--++++++-++-+-+-++-++++++-+-+++--++++-++-+++---+-+++-+--++-++----++-++--+	81.963	75	0.2723	300486
1	84386709	rs41293007	A	G	0.0011	5.117	3.11e-07	??+????+++???--??+??????+????????+??++??-??????????-????+?+??+++????+-??++++	14.741	23	0.9037	254297
1	84417585	rs41293013	T	C	0.001	-5.29	1.225e-07	??-????---???++??-??????-????????-??--??+??????????+????-?-??---????-+??----	14.194	23	0.9212	254297
1	91189933	rs12089815	A	G	0.0204	4.425	9.633e-06	-+-++-+-+--++-+++-++--++++-+---+-++++++++-++-+-+----+--+++--+-+-+--++++++--+	62.069	75	0.8573	300486
1	96151539	rs11803770	T	C	0.0095	4.616	3.921e-06	++++--+++-++++--?+-+++++++?+--++++++++--++------++-+--+-++++++-++-+-+-++++-+	90.95	73	0.07594	297840
1	96152381	rs57391113	T	G	0.0098	-4.566	4.976e-06	----++---+----++?-+---+---?-++--------++--++++++--+-++-+-----------+-+----+-	91.832	73	0.06735	297840
1	96153024	rs7552209	A	T	0.0095	-4.61	4.021e-06	----++--++----++--+-------?-++---++---++--++++++-++-++-++--+-----+-+-++---+-	97.302	74	0.03607	297920
1	96153345	rs7541532	A	G	0.0096	4.564	5.024e-06	++++--++--++++--++-+++++++?+--+++--+++--++------+--+--+--++++++++-+-+-++++-+	97.123	74	0.03705	297920
1	96153346	rs7541533	A	G	0.0095	4.557	5.178e-06	++++--++--++++--++-+++++++?+--+++--+++--++------+--+--+--++++-+++-+-+--+++-+	96.521	74	0.04053	297920
1	96154744	rs2700338	T	C	0.0117	-4.928	8.319e-07	----++---+----++-++---+-----++--------++--++++++-++-++-+---------+-+-+----+-	81.839	75	0.2755	300486
1	96165665	rs1920165	A	C	0.0112	-4.626	3.734e-06	---??+--?+?-----?-??????+?--+??-++-?--?-+?????++-?-+????------+--???---?----	46.333	45	0.4171	267076
1	96169760	rs6593680	A	G	0.0148	-4.711	2.461e-06	---+-+--+++----+--+-+---+---+++-++----+++-+--+-+---+---+------+----+--------	91.543	75	0.09408	300486
1	96170727	rs34952653	C	G	0.0152	-4.707	2.509e-06	---+-+--+++----+--+-+---+---+++-++----+++-+--+-+---+---+------+----+--------	91.242	75	0.09775	300486
1	96170953	rs1931259	A	G	0.0122	-4.853	1.215e-06	----++-+++----++--+---+-----++---++---++--++++++-++-++-++----+---+-+-++---+-	91.568	75	0.09378	300486
1	96171104	rs34496282	T	C	0.0151	4.679	2.882e-06	+++-+-++---++++-++-+-+++-+++---+--++++---+-++-+-+++-+++-++++++-++++-++++++++	90.786	75	0.1035	300486
1	96186066	rs1931254	T	C	0.0113	5.03	4.916e-07	+++---+-+-++++--++-+++-+++++--+++--+++--++-+-+--+--+--+--++-+-+++-+-+--+++-+	94.143	75	0.06677	300486
1	96187319	rs1931255	A	G	0.0107	-4.936	7.985e-07	----++-+-+----+++-+---+-----++---++---++--+++--+--+-++-++--+-++--+-+-+----+-	93.736	75	0.07056	300486
1	96198292	rs944972	A	C	0.0108	4.966	6.817e-07	++++--+-+-++++--++-+++-+++++--+++--+++--++---++-++-+--+--++-+--++++-+-++++-+	92.654	75	0.08148	300486
1	96200418	rs1931244	T	C	0.0107	4.91	9.106e-07	++++--+-+-++++--++-+++-+++++--+++--+++--++---++-++-+--+--++-+--++++-+-++++-+	93.071	75	0.07712	300486
1	96205210	rs4562676	A	G	0.0117	-4.894	9.901e-07	---+++-+-+----+++-+---+-----++---++---++--+-+-++-++-++-++--+-+-----+-++---+-	94.906	75	0.06013	300486
1	96205285	rs4317862	T	C	0.0116	-4.737	2.173e-06	---+++-+-+----+++-+---+-----++---++---++--+-+-++-++-++-+---+-+-----+-++---+-	90.675	75	0.105	300486
1	96209446	rs6667030	T	C	0.0117	-4.67	3.013e-06	---+++-+-+----+++-+---+-----++---++---++--+-+-++-++-++-++--+-+-----+-++---+-	94.458	75	0.06396	300486
1	96209826	rs6593681	T	C	0.0117	4.749	2.046e-06	+++---+-+-++++---+-+++-+++++--+++--+++--++-+-+--+--+--+--++-+-+++++-+--+++-+	95.285	75	0.05704	300486
1	96210327	rs4950075	T	C	0.0117	4.752	2.012e-06	+++---+-+-++++---+-+++-+++++--+++--+++--++-+-+--+--+--+--++-+-+++++-+--+++-+	95.356	75	0.05647	300486
1	96213417	rs10783016	C	G	0.0117	4.776	1.789e-06	+++---+-+-++++---+-+++-+++++--+++--+++--++-+-+--+--+--+--++-+-+++++-+-0+++-+	94.734	75	0.06157	300486
1	96213792	rs10747471	C	G	0.011	4.776	1.789e-06	+++---+-+-++++---+-+++-+++++--+++-++++--++---++-++-+--+-+++-+-++-++-+-++++-+	94.461	75	0.06393	300486
1	96214131	rs10735792	A	G	0.011	4.78	1.757e-06	+++---+-+-++++---+-+++-+++++--+++-++++--++---++-++-+--+-+++-+-++-++-+-++++-+	94.531	75	0.06332	300486
1	96214251	rs10874942	A	G	0.0117	-4.681	2.855e-06	---+++-+-+----+++-+---+-----++---++---++--+-+-++-++-++-++--+-+-----+-+----+-	94.182	75	0.06642	300486
1	96215738	rs10874943	A	G	0.0116	-4.752	2.01e-06	---+++-+-+----+++-+---+-----++---++---++--+-+-++-++-++-++--+-+-----+-+----+-	95.236	75	0.05743	300486
1	96216913	rs12139957	A	C	0.0109	4.729	2.253e-06	+++---+-+-++++---+-+++-+++++--+++-++++--++---++-++-+--+-+++-+-++-++-+-++++-+	94.204	75	0.06622	300486
1	96217531	rs3935599	C	G	0.0108	-4.784	1.72e-06	---+++-+-+----+++-+---+-----++---+----++--+++--+-++-++-+---+-+--+--+-+----+-	96.82	75	0.04585	300486
1	96218897	rs4550108	A	G	0.0113	4.734	2.205e-06	+++---+-+-++++---+-+++-+++++--++--++++--++---++-++-+--+-+++-+-++-++-+-++++-+	95.785	75	0.05316	300486
1	96219132	rs4472802	T	C	0.0115	4.794	1.635e-06	+++---+-+-++++---+-+++-+++++--+++--+++--++-+-+--+--+--+--++-+-+++++-+-++++-+	94.107	75	0.0671	300486
1	96220903	rs6677579	A	G	0.0109	-4.727	2.284e-06	---+++-+-+----+++-+---+-----++---+----++--+++--+-++-0+-+---+-++-+--+-+----+-	96.457	75	0.04831	300486
1	96225108	rs7544527	A	G	0.0109	-4.764	1.898e-06	---+++-+-+----+++-+---+-----++---+----++--+++--+--+-++-+---+-+--+--+-+----+-	93.215	75	0.07565	300486
1	96225735	rs4572017	A	G	0.0109	4.772	1.825e-06	+++---+-+-++++---+-+++-+++++--+++-++++--++---++-+--+--+-+++-+-++-++-+-++++-+	93.386	75	0.07395	300486
1	96227579	rs10874944	T	G	0.0116	-4.713	2.438e-06	-+-+++-+-+----+++-+---+-----++-+-++---++--+-+-++-++-++-++--+-+-----+-++---+-	96.747	75	0.04633	300486
1	96228792	rs4615893	A	T	0.0116	4.766	1.88e-06	+++---+-+-++++---+-+++-+++++--+-+--+++--++-+-+--+--+--+-+++-+-+++++-+--+++-+	97.19	75	0.04345	300486
1	96233623	rs6664676	T	C	0.0108	-4.792	1.65e-06	---+++-+-+----+++-+---+-----++---+----++--+++--+-++-++-+---+-+--+--+-+----+-	93.076	75	0.07707	300486
1	96233825	rs4949969	A	G	0.0109	-4.854	1.208e-06	---+++-+-+----+++-+---+-----++---+----++--+++--+-++-++-+---+-+--+--+-+----+-	96.516	75	0.0479	300486
1	96234017	rs4949970	C	G	0.0107	-4.814	1.477e-06	---+++-+-+----+++-+---+-----++---+----++--+++--+-++-++-+---+-+--+--+-+----+-	94.462	75	0.06392	300486
1	96234129	rs6665188	A	C	0.0109	-4.814	1.482e-06	---+++-+-+----+++-+---+-----++---+----++--+++--+-++-++-+---+-+--+--+-+----+-	96.886	75	0.04541	300486
1	96234527	rs4427449	T	G	0.0127	-5.032	4.847e-07	---+++-+-+----+++-+---+-----++--------++--+++--+-++-++-++--+--+-+--+-+----+-	96.19	75	0.05019	300486
1	96236142	rs10874945	A	G	0.0107	4.814	1.476e-06	+++---+-+-++++---+-+++-+++++--+++-++++--++---++-+--+--+-+++-+-++-++-+-++++-+	95.399	75	0.05613	300486
1	96236784	rs10874946	T	G	0.0109	-4.798	1.6e-06	---+++-+-+----+++-+---+-----++---+----++--+++--+-++-++-+---+-+--+--+-+----+-	97.002	75	0.04465	300486
1	96237242	rs10874947	A	G	0.0107	-4.798	1.605e-06	---+++-+-+----+++-+---+-----++---+----++--+++--+-++-++-+---+-+--+--+-+----+-	94.858	75	0.06053	300486
1	96239862	rs6593684	A	G	0.0108	-4.886	1.027e-06	---+++-+-+----+++-+---+-----++---+----++--+++--+-++-++-+---+-+--+--+-+----+-	97.616	75	0.04082	300486
1	96241679	rs4279891	T	C	0.0108	-4.86	1.176e-06	---+++-+-+----+++-+---+-----++---+----++--+++--+-++-++-+---+-+--+--+-+----+-	97.28	75	0.04288	300486
1	96243322	rs10783017	T	C	0.0108	4.814	1.478e-06	+++---+-+-++++---+-+++-+++++--+++-++++--++---++-+--+--+-+++-+-++-++-+-++++-+	97.101	75	0.04402	300486
1	96243545	rs10874948	A	G	0.0107	4.813	1.489e-06	+++---+-+-++++---+-+++-+++++--+++-++++--++---++-+--+--+-+++-+-++-++-+-++++-+	94.978	75	0.05953	300486
1	96245694	rs7548350	T	G	0.0106	4.781	1.746e-06	+++---+-+-++++---+-+++-+++++--+++-++++--++---++-+--+--+-+++-+-++-++-+-++++-+	95.6	75	0.05457	300486
1	96245723	rs7545573	A	G	0.0195	4.561	5.098e-06	+++---+++-++++-----+++-+++++--+++--+++---+---++-+--+--+-+++-+-++-++-+-++++-+	89.859	75	0.1161	300486
1	96246889	rs4565772	A	T	0.0107	-4.82	1.433e-06	---+++-+-+----+++-+---+-----++---+----++--+++--+-++-++-+---+-+--+--+-+----+-	97.751	75	0.04001	300486
1	96247539	rs10874949	A	T	0.0105	4.799	1.594e-06	+++---+-+-++++---+-+++-+++++--+++-++++--++---++-+--+--+-+++-+-++-++-+-++++-+	96.168	75	0.05035	300486
1	96247835	rs10783018	A	G	0.0106	-4.772	1.828e-06	---+++-+-+----+++-+---+-----++---+----++--+++--+-++-++-+---+-+--+--+-+----+-	97.663	75	0.04054	300486
1	96645154	rs321579	A	G	0.0113	-4.767	1.866e-06	+---+-+--+-++-+--++++-++--+-++--+--++-----+-+--++---+--+-+---+---+-+-++---+-	76.598	75	0.427	300486
1	96648521	rs321582	T	G	0.0118	-4.699	2.617e-06	+---+-+--+-++-+--++++-++--+-++--+--++-----+-+--++---+--+++---+---+-+-++---+-	79.331	75	0.3441	300486
1	96648837	rs321584	A	G	0.0121	-4.882	1.052e-06	+---+-+--+--+-+--++++-++--+-++--+--++-----+-+--++---+--+-+-------+-+-+----+-	76.287	75	0.4369	300486
1	96649611	rs35776450	A	G	0.0113	-4.844	1.27e-06	+---+-+--+-++-+--++++-++--+-++--+--++-----+-+--++---+--+-+---+---+-+-++---+-	75.807	75	0.4522	300486
1	96649636	rs35249753	A	G	0.0113	-4.856	1.198e-06	+---+-+--+-++-+--++++-++--+-++--+--++-----+-+--++---+--+-+---+---+-+-++---+-	75.78	75	0.4531	300486
1	96656005	rs321565	A	G	0.0114	4.778	1.767e-06	-+++-+-++-+--+-++----+--++-+---+-++--+++++-+-++--+++-++-+-+++-+++-+-+--+++-+	75.284	75	0.4691	300486
1	96656104	rs321566	T	C	0.0112	-4.781	1.746e-06	+---+-+--+-++-+--++++-++--+-+++-+--++-----+-+--++---+--+-+---+---+-+-++---+-	73.455	75	0.5289	300486
1	96656983	rs321569	T	C	0.0108	4.826	1.396e-06	-+++-+-++-+--+-++---++--++++--++-++--+-+++-+-++--+++-++-+-+++-+++-+-+--+++-+	70.523	75	0.6249	300486
1	96657951	rs321571	A	T	0.0088	4.814	1.477e-06	+-++-+-++-++-+-++---++-+++++--++-+-----+++-+-+++++++-+--+-+++++++++-+--+++-+	74.813	75	0.4844	300486
1	96667664	rs321554	A	G	0.0295	4.563	5.052e-06	+++-?+-++-++-+-+?+-???--+-?+--++++---+--++-++++--+?+--+-+-+++-+++-+-+--?++-+	55.754	67	0.8348	296831
1	96674597	rs3903882	A	G	0.0096	-4.783	1.731e-06	++----+----++--+-+++--+-+-++-+++--++++------+--+-+--+-++-+---+---+-+-++---+-	84.917	75	0.2031	300486
1	96685955	rs3853692	T	G	0.0099	4.725	2.302e-06	--++++-++++--++-+---++-+++--+---++----++++++-++-+-++-+--+-+++-+++-+-+--+++-+	81.509	75	0.284	300486
1	96686194	rs3903884	C	G	0.0105	4.701	2.586e-06	--++++-++++--++-+---++-+++--+---+++---++++++-++-+-++-+--+-+++-+++-+-+--+++-+	82.124	75	0.2682	300486
1	96686237	rs4367826	A	C	0.0095	-4.742	2.121e-06	++----+----++--+-+++--+---++-+++--++++------+--+-+--+-++-+---+---+-+-++---+-	80.842	75	0.3018	300486
1	96687640	rs11165561	T	C	0.0108	-4.598	4.273e-06	++----+--+-++--+-+++--+---++-+++--+++-------+--+-+--+-++-+---+---+-+-++---+-	82.662	75	0.2548	300486
1	96688627	rs7548392	A	G	0.0094	-4.749	2.04e-06	++----+----++--+-+++--+---++-+++--++++------+--+-+--+-++-+---+---+-+-++---+-	81.183	75	0.2926	300486
1	96690250	rs4498848	A	G	0.019	-4.9	9.603e-07	++--+-+--+-++--+-+++--+-+-++++++----+-------+--+----+-++-+-+-+---+-+--+-----	76.682	75	0.4244	300486
1	96692290	rs11803205	C	G	0.01	-4.804	1.558e-06	++----+----++--+-++---+-+-++-+++--++++------+--+-+--+-++-+---+---+-+-++---+-	83.738	75	0.2292	300486
1	96694568	rs1872733	T	C	0.0098	-4.857	1.192e-06	+++---+----++--+-++---+-+-++-+++--+++0------+--+-+--+-++-+---+---+-+-++---+-	84.843	75	0.2047	300486
1	96695786	rs1041048	T	C	0.0099	-4.878	1.069e-06	+++---+----++--+-++-+-+-+-++-+++--+++-------+--+-+--+-++-+---+---+-+-++---+-	85.286	75	0.1954	300486
1	96697263	rs11165562	A	G	0.0099	-4.826	1.392e-06	+++---+----++--+-++-+-+-+-++-+++--+++-------+--+-+--+-++-+---+---+-+-++---+-	84.129	75	0.2203	300486
1	96704827	rs11165566	T	C	0.0196	-4.882	1.048e-06	+++-+-+--+-++--+-+++--+-+-++++++---++-------+----+?-+-++++-+-+---+-+--+---+-	77.082	74	0.3803	300049
1	96714511	rs324859	A	T	0.0195	4.911	9.045e-07	---+-+-++-+--++-+---++-+-+------+++--+++++++-++++-?+-+----+-+-+++-+-++-+++-+	75.843	74	0.4188	300049
1	96714996	rs324860	T	C	0.0196	-4.892	9.957e-07	+++-+-+--+-++--+-+++--+-+-++++++---++-------+----+?-+-++-+-+-+---+-+--+---+-	77.485	74	0.3682	300049
1	96738789	rs324853	T	C	0.0194	-4.775	1.8e-06	+++-+-+--+-++--+-+++--+-+-++++++---++-------+----+?-+-++-+++-+---+-+--+---+-	78.832	74	0.3287	300049
1	96738972	rs324854	T	C	0.0194	-4.769	1.85e-06	+++-+-+--+-++--+-+++--+-+-++++++---++-------+----+?-+-++-+++-+---+-+--+---+-	79.173	74	0.3191	300049
1	96753735	rs161991	T	C	0.0116	4.954	7.254e-07	-----+-++++-+++--+--++++++-+-++-+++--+-+++++++--+-?+-+-++-+++-+++-+-+--+++-+	72.438	74	0.5296	300049
1	96857105	rs326915	T	C	0.0275	-5.413	6.186e-08	+---+-+--+-++-+++-+---+-+-++++-+----+-+---+-+-------+----+-+-+---+-+-++---+-	82.97	75	0.2473	300486
1	96861011	rs632586	A	G	0.0274	-5.35	8.772e-08	+---+-+--+-++-+++-+---+-+-++++-+----+-+---+-+-----+-+----+-+-+---+-+-++---+-	82.36	75	0.2623	300486
1	96861540	rs633343	T	C	0.0232	5.374	7.701e-08	-+++-+-++-++-+---+-+++-+-+----+-++++-+-+++-+-+++++?+-++++-+-+-+++-+-+--+++-+	82.388	74	0.236	300049
1	96861720	rs1222580	T	C	0.0232	5.391	6.997e-08	-+++-+-++-++-+---+-+++-+-+----+-++++-+-+++-+-+++++?+-++++-+-+-+++-+-+--+++-+	82.136	74	0.2419	300049
1	96863198	rs662350	C	G	0.0232	5.377	7.561e-08	-+++-+-++-+--+---+-+++-+-+----+-++++-+-+++-+-+++++?+-++++-+-+-+++-+-+--+++-+	80.166	74	0.2919	300049
1	96870599	rs567440	T	G	0.0232	-5.149	2.613e-07	+---+-+--+-++-+++-+---+-+-++++-+----+-+---+-+-----?-+----+-+-+---+-+-++---+-	80.145	74	0.2925	300049
1	98288581	rs78164635	T	C	0.0045	-4.495	6.966e-06	+--???-??-++???-??+???+?++?---+++-+++--++-+-++++-+-+-+-+-++?++--?--+?-++--+-	82.087	57	0.01644	269598
1	98386955	rs61787828	A	C	0.0085	4.618	3.866e-06	-++----+-+-++++-?++???--+-+-++++++-+++-++++-++-------+++++----+++-++++-+++-+	59.167	71	0.8407	300116
1	98390477	rs61787829	A	T	0.0086	4.762	1.914e-06	-++----+-+-++++-?++??---+-+-++++++-+++-++++-++-----+--++-+----+++-++++-+++-+	61.997	72	0.7937	300208
1	98393523	rs61787830	T	C	0.0086	-4.752	2.015e-06	+--++++-+-+----+?--??+++-+-+------+---+----+--+++++-++--+-++++---+----+---+-	62.296	72	0.7858	300208
1	98404096	rs61789073	T	C	0.009	4.545	5.501e-06	-++??----+-++-+-?++???-?+++-++++++-+++-++++-++++---+--++-+----+-+-++++-?+--+	57.571	67	0.7875	299551
1	98414977	rs61789075	A	G	0.009	4.617	3.888e-06	-++----+-+-++++-?++??---+-+-++++++-+++-++++-++-----+--++-+----+++-++++-+++-+	61.809	72	0.7986	300208
1	98449380	rs61785883	T	C	0.0122	-4.674	2.955e-06	+--++++-+-+----+?--??+++-+-+------+---+----+--+++++-+---+-++++---+----+--++-	65.203	72	0.7017	300208
1	98461132	rs9324380	C	G	0.0122	4.783	1.731e-06	-++------+-++++-?++??---+-+-++++++-+++-++++-++---+-+-+++-+----+++-++++-+++-+	66.038	72	0.6756	300208
1	98475522	rs2154402	T	C	0.0126	-4.768	1.863e-06	+--++++++-+----+?--??+++-+-+------+---+----+--+++-+-+---+-++++---+----+---+-	66.235	72	0.6693	300208
1	98482580	rs2391903	A	G	0.0128	4.805	1.544e-06	-++------+-++++-?++??---+-+-++++++-+++-++++-++---+-+-+++-+----+++-++++-+++-+	66.132	72	0.6726	300208
1	98500649	rs190925241	A	T	0.0038	5.178	2.243e-07	-++???++?+?++??+?+??????-??++??--+-?-+?--?????-++?+-????+--??-++????-?-?++-+	52.139	37	0.05051	257641
1	98502159	rs1702293	C	G	0.008	4.664	3.106e-06	-++------+-++++-?++??---+-?-++++++-+++-++++-++---+-+-+++-+----+++-++++-+++-+	67.654	71	0.5906	297642
1	98502594	rs1628294	A	C	0.008	-4.63	3.664e-06	+--++++++-+----+?--??+++-+?+------+---+----+--+++-+-+---+-++++---+----+---+-	67.775	71	0.5865	297642
1	98513845	rs61786696	A	G	0.0091	4.552	5.302e-06	-++-?----+-++++-?++??---+-+-++++-+-+++-++++-++---+-+-+++-+----+++-++++-+++-+	67.292	71	0.6028	300102
1	98513959	rs61786697	A	G	0.009	-4.553	5.283e-06	+--+?++++-+----+?--??+++-+-+----+-+---+----+--+++-+-+---+-++++---+----+---+-	67.415	71	0.5987	300102
1	103629448	rs75771586	T	C	0.0092	-4.441	8.942e-06	-++--+--+-+---+-+---+++++--++--+--+-++++--+-+-++-+-++-+-+----+-+++----+-----	73.402	75	0.5306	300486
1	109839896	rs7515901	T	C	0.0086	5.038	4.716e-07	++++--+++--++++-?+-++---+-?+----+++-+++--++--++---?--+++--+++-++--+-++-++-++	86.301	72	0.1199	297403
1	109851126	rs413582	T	C	0.0129	-4.789	1.677e-06	--++--------+++--++++++----++-+++-++----+-++--++++-----+++---+--+++---+-----	91.164	75	0.09871	300486
1	109856306	rs464218	A	G	0.0106	-5.25	1.525e-07	--+-+-------++++-++++-+-----+++++-+++---+-+++--+++-+---++----++--+++--+-----	102.291	75	0.01985	300486
1	109873290	rs61394658	A	G	0.0073	4.812	1.494e-06	+++--+-++++--++------+-+-+-+-+---++--++-++---++---+-+++--++++--++--+++++++++	109.659	75	0.005605	300486
1	109876885	rs7550401	T	C	0.0073	4.798	1.601e-06	+++--+-++++--++------+-+-+-+-+---++--++-++---++---+-+++--++++--++--+++++++++	110.172	75	0.005105	300486
1	109880721	rs11102972	T	C	0.0073	-4.808	1.526e-06	---++-+----++--++++++-+-+-+-+-+++--++--+--+++--+++-+---++----++--++---------	111.003	75	0.004381	300486
1	109887191	rs4970843	T	C	0.0135	4.867	1.133e-06	++--++++++++----+------++++--+---+--++++-+--++----+-+++---+++-+++---++-+++++	92.582	75	0.08226	300486
1	109893210	rs1278664	T	G	0.0073	4.817	1.457e-06	+++--+-++++--++------+-+-+-+-+---++--++-++---++---+-+++--++++--++--+++++++++	109.388	75	0.005887	300486
1	109940503	rs72646553	C	G	0.008	4.709	2.485e-06	+++--+-++++-+++------+-+-+-+-+---++--++-++---++---+-++++-++++--++--+++++++++	105.083	75	0.01251	300486
1	109959684	rs12119154	A	G	0.0068	4.491	7.089e-06	-++??-?++++-?+++?-????-?--++-----++---+-++---++---++++++--++++++--+--++?++++	78.677	64	0.1025	298839
1	109961935	rs7555732	A	G	0.0073	4.875	1.09e-06	+++--+-++++-+++------+-+-+++-+---++--++-++---++---+-++++-++++--++--+++++++++	109.734	75	0.00553	300486
1	109968410	rs3820667	A	C	0.0111	5.417	6.045e-08	++++++++++++----+----+-+++++-----+---+++-+---+------+++--++++-+++---++-+++++	103.345	75	0.01672	300486
1	109973387	rs1149168	A	G	0.0073	4.849	1.24e-06	+++--+-++++-+--------+-+-+++-+---++--++-++---++---+-++++-++++--++--+++++++++	110.582	75	0.004736	300486
1	109991175	rs111318912	T	C	0.0067	4.445	8.772e-06	-++??-?++-++?+++?-????-?--++-----++---+-++---++---++++++--+++--+--+--++?++++	83.345	64	0.05258	298839
1	110004543	rs4970762	C	G	0.0094	-5.233	1.665e-07	---+--------++++-++++-+--+--+++++-+++---+-++---+++++---++----+---+++--+-----	118.808	75	0.0009583	300486
1	110007652	rs1765756	A	G	0.007	-4.71	2.482e-06	---++-+----++--++++++-+-++--+---+--++--+--+++--++--+---++----++--++---------	116.224	75	0.001611	300486
1	110009106	rs4970764	C	G	0.0104	4.645	3.402e-06	+++-++++++++---++------++++--+++-+--++++-+--+++--++-+++---+-+-+++---++-+++++	108.751	75	0.006603	300486
1	110013112	rs1144595	A	G	0.007	4.691	2.72e-06	+++--+-++++--++------+-+--++-+++-++--++-++---++--++-++++-++++--++--+++++++++	114.899	75	0.00209	300486
1	110022896	rs569670	A	C	0.0057	-4.797	1.613e-06	---++-+----++-+++++++-+--+--+---+--++--+--+++--++--+----+----++--++---------	114.301	75	0.002347	300486
1	110023432	rs485660	A	G	0.0057	4.731	2.239e-06	+++--+-++++--+-------+-+--++-+++-++--++-++---++--++-++++-++++--++--+++++++++	113.878	75	0.002547	300486
1	110035159	rs11590351	T	C	0.0068	-4.703	2.566e-06	---++-+----++--++++++-+-++--+---+--++--+--+++--++--+-+-++----++--++---------	101.648	75	0.022	300486
1	110036919	rs76997102	C	G	0.0053	-4.703	2.559e-06	---??++---------?++???+---+-+++++--++--+--+++--+++-+----++---+--++++--------	71.201	69	0.4044	299874
1	110036998	rs17575205	C	G	0.0073	4.646	3.391e-06	+++--+-++++--++------+-++-++-+-+-++--++-++---++--++-+-+--++++--++--+++++++++	102.009	75	0.02076	300486
1	110044375	rs579652	A	G	0.0092	-5.267	1.388e-07	---------+-++-+++-+++++---+++-+++--+--+-+-++++-+++------+--+-+---+++--------	121.657	75	0.0005309	300486
1	110044458	rs580522	A	G	0.0095	-5.236	1.644e-07	---------+-++-+++-+++-+---+++++++--+--+-+-++++-+++------+--+-+---+++--------	123.096	75	0.0003913	300486
1	110047110	rs14184	C	G	0.0096	-5.295	1.192e-07	---+-----+-++-+++-+++-+---+++++++--+--+-+-++++-+++------+--+++---+++--------	122.62	75	0.0004331	300486
1	110047333	rs1009437	A	G	0.005	4.556	5.21e-06	+++??-++++++++++?--???-+++-+-+---++--++-++---++---+-++++--+++--+----++-+++++	67.601	69	0.5251	299874
1	110067789	rs113519150	A	T	0.005	-4.826	1.396e-06	+--??+?---------?++???-?-++-+++----+++-+--+++--+++--+---++---++-+++++--?----	64.233	66	0.5386	299371
1	110079143	rs12141273	A	G	0.0052	4.572	4.833e-06	-++??-?+++++?+++?-????-?+--+---++++---+-++---++---++-++++-+++--+-----++?++++	64.264	64	0.4672	298839
1	110098864	rs138593150	T	C	0.003	4.717	2.388e-06	-++????+++++?++???????+?+???+--+-++??-?-++-?-+?+?+?+-+?+--+???-?????+++?++++	38.575	42	0.6221	276370
1	110108748	rs142639967	C	G	0.0031	4.777	1.78e-06	-++????+++++?++???????+?+???+--+-++??-?-++-?-+++?+?+-+?+--+???-?????+++?++++	39.796	43	0.6111	276932
1	110141187	rs17648684	T	C	0.0052	4.523	6.106e-06	-++??-?+++++?+++?-????-?+--+---++++---+-++---++---?+-+++--+++-++-----++?++++	61.816	63	0.5186	298402
1	110154085	rs12118605	T	C	0.0054	4.418	9.941e-06	-++??-?+++++?+++?-????-?+--+---++++---+-++---++---?+-+++--+++-++------+?++++	60.887	63	0.552	298402
1	153760104	rs10752613	A	T	0.0116	-4.966	6.831e-07	+-++-+-+?-+-++-+---+--+------+----+-+-----++----+-?-+++--+-+--+-++++-++--+--	82.543	73	0.2083	290977
1	153765399	rs6690619	T	C	0.0155	4.464	8.048e-06	-+----+-?+---+++-++-++-+++++++++++-++-+-+++-++++--++++--+---+--++---+-+++-++	70.913	74	0.5802	291414
1	153768740	rs12738361	T	C	0.0145	4.45	8.599e-06	-+----+-?+---+++-++-++-+++++++++++-++-+-+++-++++--++++--+---+--++---+-+++-++	69.135	74	0.6383	291414
1	153768982	rs11583896	A	G	0.0112	-5.169	2.354e-07	+-++-+-+?-+-++-+---+--+------+----+-+-+----+---++-?--++--+-+--+-++++-++--+--	79.11	73	0.2922	290977
1	153769332	rs61803655	A	G	0.0145	4.46	8.195e-06	-+----+-?+---+++-++-++-+++++++++++-++-+-+++-++++--++++--+---+--++---+-+++-++	69.588	74	0.6236	291414
1	153769400	rs9426935	T	C	0.0146	4.474	7.683e-06	-+----+-?+---+++-++-++-+++++++++++-++-+-+++-++++--++++--+---+--++---+-+++-++	69.406	74	0.6295	291414
1	153773240	rs12133923	A	C	0.014	4.463	8.065e-06	-+----+-?+---+++-++-++-+++++++++++-++-+-+++-++++--++++--+---+--++---+-+++-++	71.074	74	0.5749	291414
1	153775017	rs4077168	A	T	0.012	5.212	1.867e-07	-+--+-+-?+-+--+-+++-++-++++++-++++-+-++++++-+++--+?++--++-+-++-+----+--++-++	82.299	73	0.2136	290977
1	153776666	rs4341393	T	C	0.0142	4.496	6.935e-06	-+----+-?+---+++-++-++-+++++++++++-++-+-+++-++++--++++--+---+--++---+-+++-++	70.923	74	0.5798	291414
1	153777669	rs4451582	T	G	0.0143	4.534	5.781e-06	-+----+-?+---+++-++-++-+++++++++++-++-+-+++-++++--++++--+---+--++---+-+++-++	70.715	74	0.5867	291414
1	153777848	rs1139620	T	C	0.0141	4.582	4.615e-06	-+----+-?+----++-++-++-+++++++++++-++-+-+++-++++--++++--+---+--++---+-+++-++	70.018	74	0.6096	291414
1	153779412	rs1127091	A	G	0.0139	-4.548	5.415e-06	+-++++-+?-+++---+--+--+-----------+--+-+---+----++----++-+++-++--+++-+---+--	71.672	74	0.5551	291414
1	153780298	rs9426938	T	C	0.0142	4.518	6.245e-06	-+----+-?+---+++-++-++-+++++++++++-++-+-+++-++++--++++--+---+--++---+-+++-++	70.763	74	0.5851	291414
1	153781888	rs6700115	A	G	0.0142	4.508	6.543e-06	-+--+-+-?+---+++-++-++-+++++++++++-++-+-+++-++++--++-+--+---+--++---+-+++-++	70.993	74	0.5775	291414
1	153786182	rs6668066	A	G	0.0141	4.512	6.435e-06	-+----+-?+---+++-++-++-+++++++++++-++-+-+++-++++--++++--+---+--++---+-+++-++	70.842	74	0.5825	291414
1	153786314	rs6677794	T	C	0.014	4.517	6.263e-06	-+----+-?+---+++-++-++-+++++++++++-++-+-+++-++++--++++--+---+--++---+-+++-++	70.92	74	0.58	291414
1	153787279	rs113422987	T	C	0.0119	-5.184	2.177e-07	+-++-+-+?-+-++-+---+--+------+----+-+------+---++-?--++--+-+--+-++++-++--+--	80.184	73	0.2641	290977
1	153788211	rs72694220	T	C	0.0119	5.148	2.63e-07	-+--+-+-?+-+--+-+++-++-++++++-++++-+-++++++-++++-+?++--++-+-++-+----+--++-++	80.107	73	0.266	290977
1	153790501	rs4363451	T	C	0.0119	-5.146	2.661e-07	+-++-+-+?-+-++-+---+--+------+----+-+------+---++-?--++--+-+--+-++++-++--+--	79.86	73	0.2724	290977
1	153792958	rs9427232	A	G	0.0142	4.505	6.631e-06	-+----+-?+---+++-++-++-+++++++++++-++-+-+++-++++--++++--+---+--++---+-+++-++	71.037	74	0.5761	291414
1	153793192	rs9427233	A	C	0.0142	-4.508	6.533e-06	+-++++-+?-+++---+--+--+-----------+--+-+---+----++----++-+++-++--+++-+---+--	71.231	74	0.5697	291414
1	153794697	rs4596938	T	C	0.0142	-4.488	7.204e-06	+-++++-+?-+++---+--+--+-----------+--+-+---+----++----++-+++-++--+++-+---+--	71.291	74	0.5677	291414
1	153795569	rs10796956	T	C	0.0119	5.439	5.372e-08	-+--+-+-?+-+--+-++++++-++++++-++++-+-++++++-++++-+?+---++-+-++-+----+--++-++	81.408	73	0.2341	290977
1	153798128	rs4391701	T	C	0.0123	-5.17	2.344e-07	+-++-+-+?-+-++-+---+--+------+----+-+------+----+-?--++--+-+--+-++++-++--+--	81.02	73	0.2433	290977
1	153805677	rs6427300	T	G	0.0141	-4.53	5.89e-06	+-++++-+?-+++---+--+--+-----------+--+-+---+----++?---++-+++-++--+++-+---+--	72.391	73	0.4981	290977
1	153810564	rs7512766	T	C	0.0122	-5.216	1.831e-07	+-++-+-+?-+-++-+---+--+------+----+-+------+----+-?--++--+-+--+-++++-++--+--	81.285	73	0.237	290977
1	153812119	rs6427306	T	C	0.0139	4.477	7.561e-06	-+----+-?+---+++-++-++-+++++++++++-++-+-+++-++++--?+++--+---+--++---+-+++-++	72.245	73	0.503	290977
1	153812883	rs12120118	A	G	0.0141	4.51	6.488e-06	-+----+-?+---+++-++-++-+++++++++++-++-+-+++-++++--?+++--+---+--++---+-+++-++	72.375	73	0.4986	290977
1	153813165	rs4370789	A	C	0.0141	-4.509	6.502e-06	+-++++-+?-+++---+--+--+-----------+--+-+---+----++?---++-+++-++--+++-+---+--	72.424	73	0.497	290977
1	153814543	rs4581307	A	G	0.0141	4.51	6.495e-06	-+----+-?+---+++-++-++-+++++++++++-++-+-+++-++++--?+++--+---+--++---+-+++-++	72.164	73	0.5057	290977
1	153816752	rs72694231	T	C	0.0122	5.221	1.784e-07	-+--+-+-?+-+--+-+++-++-++++++-++++-+-++++++-+++--+?++--++-+-++-+----+--++-++	81.636	73	0.2287	290977
1	153817755	rs72694233	A	G	0.0141	4.502	6.723e-06	-+----+-?+---+++-++-++-+++++++++++-++-+-+++-++++--?+++--+---+--++---+-+++-++	72.098	73	0.5079	290977
1	153825404	rs4845576	T	C	0.0118	-5.223	1.756e-07	+-++-+--?-+-++-+---+--+------+----+-+------+----+-?--++--+-+--+-++++-++--+--	81.968	73	0.2211	290977
1	153827552	rs7554469	A	G	0.014	-4.515	6.339e-06	+-++++-+?-+++---+--+--+-----------+--+-+---+----++?---++-+++-++--+++-+---+--	72.427	73	0.4969	290977
1	153828080	rs4595397	T	C	0.0127	5.215	1.839e-07	-+--+-++?+-+--+-+++-++-+++++++++++-+-+++++--+++--+?++--++-+-++-+----+--++-++	84.658	73	0.1654	290977
1	153829389	rs4520447	T	C	0.012	5.24	1.607e-07	-+--+-++?+-+--+-+++-++-++++++-++++-+-++++++-++++-+?++--++-+-++-+----+--++-++	81.626	73	0.229	290977
1	153829993	rs4845578	A	G	0.012	-5.197	2.02e-07	+-++-+--?-+-++-+---+--+------+----+-+------+---++-?--++--+-+--+-++++-++--+--	82.214	73	0.2156	290977
1	153831157	rs4508047	T	C	0.012	5.197	2.025e-07	-+--+-++?+-+--+-+++-++-++++++-++++-+-++++++-++++-+?++--++-+-++-+----+--++-++	82.417	73	0.211	290977
1	153831246	rs6700451	T	C	0.0121	5.176	2.262e-07	-+--+-++?+-+--+-+++-++-++++++-++++-+-++++++-++++-+?++--++-+-++-+----+--++-++	82.468	73	0.2099	290977
1	153833104	rs11585416	A	T	0.0121	5.152	2.576e-07	-+--+-++?+-+--+-+++-++-++++++-++++-+-++++++-++++++?++--++-+-++-+----+--++-++	84.031	73	0.1774	290977
1	153833153	rs11583152	A	G	0.0121	-5.175	2.279e-07	+-++-+--?-+-++-+---+--+------+----+-+------+---+--?--++--+-+--+-++++-++--+--	84.023	73	0.1776	290977
1	153833591	rs7552274	T	C	0.0123	-5.164	2.419e-07	+-++-+--?-+-++-+---+--+------+----+-+------+---+--?--++--+-+--+-++++-++--+--	83.689	73	0.1842	290977
1	153834868	rs6694061	C	G	0.012	-5.174	2.295e-07	+-++-+-+?-+-++-+---+--+------+----+-+------+---++-?--++--+-+--+-++++-++--+--	82.874	73	0.2011	290977
1	153836163	rs59308681	A	G	0.0126	-5.082	3.74e-07	+-++-+-+?-+-++-+---+--+------0----+-+---+--+---++-?--++--+-+--+-++++-++--+--	81.52	73	0.2314	290977
1	153836383	rs4276953	A	G	0.0135	4.513	6.4e-06	-+----+-?+---+++-++-++-+++++++++++-++-+-+++-++++--?+++--+---+--++---+-+++-++	73.483	73	0.4621	290977
1	153837181	rs11587151	T	C	0.0122	-5.172	2.321e-07	+-++-+-+?-+-++-----+--+------+----+-+------+---++-?--++--+-+--+-++++-++--+--	82.284	73	0.214	290977
1	153839045	rs34805562	T	C	0.0119	-5.175	2.277e-07	+-++-+-+?-+-++-+---+--+------+----+-+------+---++-?--++--+-+--+-++++-++--+--	82.992	73	0.1986	290977
1	153840505	rs12567313	T	C	0.0119	5.168	2.367e-07	-+--+-+-?+-+--+-+++-++-++++++-++++-+-++++++-++++-+?++--++-+-++-+----+--++-++	82.67	73	0.2055	290977
1	153841721	rs112874207	T	C	0.012	5.175	2.277e-07	-+--+-+-?+-+--+-+++-++-++++++-++++-+-++++++-+++--+?++--++-+-++-+----+--++-++	82.837	73	0.2019	290977
1	153842288	rs12042989	A	G	0.012	5.192	2.084e-07	-+--+-+-?+-+--+-+++-++-++++++-++++-+-++++++-++++-+?++--++-+-++-+----+--++-++	82.662	73	0.2057	290977
1	153843036	rs12041850	C	G	0.0119	5.2	1.989e-07	-+--+-+-?+-+--+-+++-++-++++++-++++-+-++++++-++++-+?++--++-+-++-+----+--++-++	82.688	73	0.2051	290977
1	153843243	rs59678326	T	C	0.012	5.186	2.15e-07	-+--+-+-?+-+--+-+++-++-++++++-++++-+-++++++-+++--+?++--++-+-++-+----+--++-++	82.667	73	0.2056	290977
1	153848208	rs11590099	T	C	0.0118	-5.177	2.253e-07	+-++-+-+?-+-++-+---+--+------+----+-+------+---++-?--++--+-+--+-++++-++--+--	82.457	73	0.2102	290977
1	153848996	rs7414227	A	G	0.014	4.533	5.807e-06	-+----+-?+---+++-++-++-+++++++++++-++-+-+++-++++--?+++--+---+--++---+-+++-++	73.426	73	0.464	290977
1	153851106	rs12041920	T	C	0.0119	5.194	2.062e-07	-+--+-+-?+-+--+-+++-++-++++++-++++-+-++++++-+++--+?++--++-+-++-+----+--++-++	82.683	73	0.2052	290977
1	153854036	rs7522030	T	C	0.0138	4.53	5.9e-06	-+----+-?+---+++-++-++-+++++++++++-++-+-+++-++++--?+++--+---+--++---+-+++-++	71.807	73	0.5175	290977
1	153854070	rs60150125	A	G	0.0119	-5.17	2.338e-07	+-++-+-+?-+-++-+---+--+------+----+-+------+---++-?--++--+-+--+-++++-++--+--	83.784	73	0.1823	290977
1	153854380	rs12043350	T	C	0.0119	-5.124	2.999e-07	+-++-+-+?-+-++-+---+--+------+----+-+------+---++-?--++--+-+--+-++++-++--+--	82.446	73	0.2104	290977
1	153856364	rs12042562	C	G	0.0119	-5.115	3.142e-07	+-++-+-+?-+-++-+---+--+------+----+-+------+---++-?--++--+-+--+-++++-++--+--	83.808	73	0.1818	290977
1	153856873	rs12409811	T	C	0.0119	-5.059	4.209e-07	+-++-+-+?-+-++-+---+--+------+----+-+------+---++-?--++--+-+--+-++++-++--+--	82.964	73	0.1992	290977
1	153858720	rs7537691	T	C	0.0122	-5.117	3.107e-07	+-++-+-+?-+-++-+---+--+------+----+-+------+---++-?--++--+-+--+-++++-++--+--	83.094	73	0.1965	290977
1	153859335	rs35711150	A	G	0.0134	4.498	6.875e-06	-+----+-?+---+++-++-++-+++++++++++-++-+-+++-++++--?+++--+---+--++---+-+++-++	73.593	73	0.4585	290977
1	153860305	rs11586830	A	G	0.0118	-5.154	2.547e-07	+-++-+-+?-+-++-+---+--+------+----+-+------+---++-?--++--+-+--+-++++-++--+--	82.969	73	0.1991	290977
1	153860453	rs11589043	A	T	0.0119	5.175	2.275e-07	-+--+-+-?+-+--+-+++-++-++++++-++++-+-++++++-+++--+?++--++-+-++-+----+--++-++	83.23	73	0.1936	290977
1	153863426	rs113489222	T	G	0.0129	-4.754	1.995e-06	+-++-+--?-+-++-+---+--+-------+---+-+------++---+-?--++--+-+--+-++++-++--+--	81.697	73	0.2273	290977
1	153865461	rs7415004	A	G	0.0142	4.526	6.001e-06	-+----+-?+---+++-++-++-+++++++++++-++-+-+++-++++--?+++--+---+--++---+-+++-++	72.787	73	0.485	290977
1	153865536	rs11264532	A	G	0.0121	-5.111	3.206e-07	+-++-+-+?-+-++-+---+--+------+----+-+------+---++-?--++--+-+--+-++++-++--+--	83.619	73	0.1856	290977
1	153867805	rs6427329	A	G	0.0121	5.1	3.405e-07	-+--+-+-?+-+--+-+++-++-++++++-++++-+-++++++-+++--+?++--++-+-++-+----+--++-++	82.95	73	0.1995	290977
1	153868650	rs6659220	A	T	0.0116	-4.999	5.767e-07	+-++-+-+?-+-++-+---+--+------+----+-+------+---++-?--++--+-+--+-++++-++--+--	82.467	73	0.2099	290977
1	153868966	rs11591134	A	G	0.0117	-5.056	4.272e-07	+-++-+-+?-+-++-+---+--+------+----+-+------+---++-?--++--+-+--+-++++-++--+--	82.622	73	0.2066	290977
1	153869946	rs12401565	A	G	0.0116	-5.08	3.765e-07	+-++-+-+?-+-++-+---+--+------+----+-+------+---++-?--++--+-+--+-++++-++--+--	83.034	73	0.1977	290977
1	153870649	rs12022158	A	G	0.0116	5.076	3.855e-07	-+--+-+-?+-+--+-+++-++-++++++-++++-+-++++++-+++--+?++--++-+-++-+----+--++-++	83.059	73	0.1972	290977
1	153871592	rs11589857	A	G	0.0117	-5.046	4.502e-07	+-++-+-+?-+-++-+---+--+------+----+-+------+---++-?--++--+-+--+-++++-++--+--	82.776	73	0.2032	290977
1	153872615	rs12022730	A	C	0.0116	-5.05	4.428e-07	+-++-+-+?-+-++-+---+--+------+----+-+------+---++-?--++--+-+--+-++++-++--+--	82.97	73	0.1991	290977
1	153874688	rs11264559	T	C	0.0117	-5.044	4.568e-07	+-++-+-+?-+-++-+---+--+------+----+-+------+---++-?--++--+-+--+-++++-++--+--	82.697	73	0.2049	290977
1	153875689	rs11264567	A	G	0.0114	4.986	6.164e-07	-+--+-++?+----+-+++-++-++++++-++++-+-++++++-+++--+?++--++-+-++-+----+--++-++	82.136	73	0.2173	290977
1	153876975	rs11264573	A	G	0.012	-4.488	7.177e-06	+-++++-+?-+++---+--+--+---+-------+--+-+---+----++?---++-+++-++--+++-+---+--	73.111	73	0.4743	290977
1	153877724	rs11577942	A	G	0.0114	-5.019	5.186e-07	+-++-+-+?-+-++-+---+--+------+----+-+------+---++-?--++--+-+--+-++++-++--+--	83.097	73	0.1964	290977
1	153879744	rs6671132	T	C	0.0115	-4.983	6.246e-07	+-++-+-+?-+-++-+---+--+------+----+-+------+---++-?--++--+-+--+-++++-++--+--	82.934	73	0.1998	290977
1	153883283	rs12028398	T	C	0.0115	-4.999	5.757e-07	+-++-+-+?-+-++-+---+--+------+----+-+------+---++-?--++--+-+--+-++++-++--+--	82.997	73	0.1985	290977
1	153883881	rs4845583	T	C	0.0118	-4.989	6.08e-07	+-++-+-+?-+-++-+---+--+------0----+-+------+---++-?--++--+-+--+-++++-++--+--	83.395	73	0.1902	290977
1	153886762	rs12032914	A	G	0.0115	4.962	6.986e-07	-+--+-+-?+-+--+-+++-++-++++++-++++-+-++++++-+++--+?++--++-+-++-+----+--++-++	84.263	73	0.1729	290977
1	153886873	rs12033835	T	C	0.0116	4.955	7.223e-07	-+--+-+-?+-+--+-+++-++-++++++-++++-+-++++++-+++--+?++--++-+-++-+----+--++-++	83.233	73	0.1936	290977
1	153890988	rs11581644	A	G	0.0116	4.948	7.502e-07	-+--+-+-?+-+--+-+++-++-++++++0++++-+-++++++-+++--+?++--++-+-++-+----+--++-++	80.929	73	0.2455	290977
1	153896212	rs4845357	A	G	0.0122	4.936	7.96e-07	-+--+-+-?+-+--+-+++-++-++++++-++++-+-++++++-+++--+?++--++-+-++-+----+--++-++	82.496	73	0.2093	290977
1	153896370	rs4845585	T	C	0.0119	4.947	7.533e-07	-+--+-++?+-+--+-+++-++-++++++-++++-+-++++++-+++--+?++--++-+-++-+----+--++-++	82.925	73	0.2	290977
1	153896425	rs4845358	T	C	0.0116	-4.951	7.391e-07	+-++-+-+?-+-++-+---+--+------+----+-+------+---++-?--++--+-+--+-++++-++--+--	82.76	73	0.2036	290977
1	153899330	rs10796968	A	C	0.0114	4.935	8.018e-07	-+--+-++?+-+--+-+++-++-++++++-++++-+-++++++-+++--+?++--++-+-++-+----+--++-++	83.06	73	0.1972	290977
1	153900490	rs12406003	A	C	0.0118	-4.937	7.944e-07	+-++-+-+?-+-++-+---+--+------+----+-+------+---++----++--+-+--+-++++-++--+--	83.706	74	0.2062	291414
1	153900980	rs10127484	A	G	0.0119	4.428	9.51e-06	-+----+-?+---+++-++-++-+++-+++++++-++-+-+++-++++--++++--+---+--++---+-+++-++	72.988	74	0.5114	291414
1	153901149	rs3748849	A	G	0.0117	4.971	6.662e-07	-+--+-+-?+-+--+-+++-++-++++++-++++-+-++++++-+++--++++--++-+-++-+----+--++-++	83.432	74	0.2122	291414
1	153901302	rs3748848	A	G	0.0117	4.958	7.123e-07	-+--+-+-?+-+--+-+++-++-++++++-++++-+-++++++-+++--++++--++-+-++-+----+--++-++	83.375	74	0.2134	291414
1	153903883	rs1572788	T	C	0.0117	4.984	6.222e-07	-+--+-+-?+-+--+-+++-++-++++++-++++-+-++++++-+++--++++--++-+-++-+----+--++-++	82.439	74	0.2348	291414
1	153904214	rs11586593	T	C	0.0116	5.019	5.185e-07	-+--+-++?+-+--+-+++-++-++++++-++++-+-++++++-+++--++++--++-+-++-+----+--++-++	83.953	74	0.2009	291414
1	153904338	rs11264619	A	G	0.0117	-4.979	6.387e-07	+-++-+-+?-+-++-+---+--+------+----+-+------+---++----++--+-+--+-++++-++--+--	83.445	74	0.2119	291414
1	153904574	rs11264620	T	C	0.0112	5.004	5.619e-07	-+--+-+-?+-+--+-+++-++-++++++-++++-+-++++++-+++--++++--++-+-++-+----+--++-++	83.399	74	0.2129	291414
1	153906397	rs11264621	A	G	0.012	4.456	8.356e-06	-+----+-?+---+++-++-++-+++-+++++++-++-+-+++-++++--++++--+---+--++---+-+++-++	72.886	74	0.5148	291414
1	153907839	rs58095661	T	C	0.0118	4.981	6.314e-07	-+--+-+-?+-+--+-+++-++-++++++-++++-+-++++++-+++--++++--++-+-++-+----+--++-++	83.477	74	0.2112	291414
1	153907908	rs61219911	T	C	0.0117	4.981	6.318e-07	-+--+-+-?+-+--+-+++-++-++++++-++++-+-++++++-+++--++++--++-+-++-+----+--++-++	83.418	74	0.2125	291414
1	153908309	rs11586075	A	G	0.0112	-5.002	5.673e-07	+-++-+-+?-+-++-+---+--+------+----+-+------+---++----++--+-+--+-++++-++--+--	83.45	74	0.2118	291414
1	153909069	rs1043608	C	G	0.0111	-4.958	7.137e-07	+-++-+--?-+-++-+---+--+------+----+-+------+---++----++--+-+--+-++++-++--+--	83.366	74	0.2136	291414
1	153913699	rs1110165	T	G	0.0118	5.002	5.672e-07	-+--+-+-?+-+--+-+++-++-++++++-++++-+-++++++-+++--++++--++-+-++-+----+--++-++	83.196	74	0.2174	291414
1	153917369	rs6680140	T	C	0.0119	-5.035	4.768e-07	+-++-+-+?-+-++-+---+--+------+----+-+------+---++----++--+-+--+-++++-++--+--	83.212	74	0.2171	291414
1	153919756	rs946682	T	G	0.0119	5.077	3.833e-07	-+--+-++?+-+--+-+++-++-++++++-++++-+-++++++-+++--++++--++-+-++-+----+--++-++	83.176	74	0.2179	291414
1	153920286	rs8450	A	G	0.0119	-5.03	4.904e-07	+-++-+--?-+-++-+---+--+------+----+-+------+---++----++--+-+--+-++++-++--+--	83.063	74	0.2204	291414
1	153920564	rs10559	A	G	0.0118	5.036	4.755e-07	-+--+-++?+-+--+-+++-++-++++++0++++-+-++++++-++++-++++--++-+-++-+----+--++-++	82.55	74	0.2322	291414
1	153923276	rs10127983	T	C	0.0103	-5.024	5.054e-07	+-++-+-+?-+-++-----+--+------+----+-+------+---+-----++--+-+--+-++++-++--+--	80.931	74	0.2718	291414
1	153926078	rs11264680	T	C	0.0119	5.149	2.625e-07	-+--+-++?+-+--+-+++-++-+++++++++++-+-++++++-+++--++++--++-+-++-+----+--++-++	85.788	74	0.1645	291414
1	153927052	rs10908557	C	G	0.0112	5.141	2.728e-07	-+--+-++?+-+--+-+++-++-++++++-++++-+-++++++-+++--++++--++-+-++-+----+--++-++	83.559	74	0.2094	291414
1	153927270	rs10908558	T	C	0.0121	5.135	2.814e-07	-+--+-++?+-+--+-+++-++-++++++-++++-+-+-++++-+++--++++--++-+-++-+----+--++-++	84.933	74	0.1809	291414
1	153932212	rs6724	C	G	0.0119	-4.825	1.4e-06	+-++++-+?-+-++-+-+-+--+-----------+-+-++---+----+----++0-+-+--+-++++-++--+--	80.421	74	0.2851	291414
1	153934203	rs3791187	T	C	0.012	5.102	3.366e-07	-+--+-++?+-+--+-+++-++-++++++-++++-+-++++++-+++--++++--++-+-++-+----+--++-++	84.855	74	0.1824	291414
1	153937746	rs11264734	T	C	0.0129	4.804	1.552e-06	-+----+-?+-+--+-+-+-++-+++++++++++-+-+--+++-++++-++++--++-+-++-+----+--++-++	80.287	74	0.2887	291414
1	153937864	rs12027783	T	C	0.0128	-4.791	1.663e-06	+-++++-+?-+-++-+-+-+--+-----------+-++++---+----+----++----+--+-++++-++--+--	80.382	74	0.2861	291414
1	153941514	rs11264743	T	C	0.0126	-4.663	3.12e-06	+-++++-+?-+-++-+-+-+--+-----------+-++++---+----+----++--+-+--+-++++-++--+--	80.504	74	0.2829	291414
1	153942156	rs12023699	A	G	0.0125	-4.67	3.007e-06	+-++++-+?-+-++-+-+-+--+-----------+-++++---+----+----++----+--+-++++-++--+--	80.359	74	0.2868	291414
1	153943079	rs12403956	A	G	0.0118	4.669	3.031e-06	-+----+-?+-+--+-+-+-++-+++++++++++-+----+++-++++-++++--++++-++-+----+--++-++	80.312	74	0.288	291414
1	153943800	rs6666703	T	C	0.0128	-4.629	3.683e-06	+-++++-+?-+-++-+-+-+--+-----------+-++++---+----+----++--+-+--+-++++-++--+--	79.953	74	0.2976	291414
1	153948705	rs11264763	T	C	0.0121	-4.575	4.751e-06	+-++++-+?-+-++-+-+-+--+-----------+-++++---+---++----++----++-+-++++-++--+--	83.108	74	0.2194	291414
1	153952598	rs7524739	T	G	0.0113	4.832	1.353e-06	-+----+-?+-+--+-+-+-++-+++?+++++++-+-+--+++-+++--++++--++++--+-+----+--++-++	86.35	73	0.136	288848
1	153954674	rs10908578	T	C	0.0114	4.46	8.195e-06	-+----+-?+---+++--++++-+++++++++++-++---+++-++++--+++++-++--+--++---+-+++-++	75.27	74	0.437	291414
1	153966081	rs12564669	C	G	0.0135	-4.878	1.072e-06	+-++++-+?-+-++-+-+-+--+-----------+-+-++---+---+-----++----++-+-++++-++--+--	82.544	74	0.2323	291414
1	153974621	rs6701341	T	C	0.0133	-4.831	1.355e-06	+-++++-+?-+-++-+-+-+--+-----------+-+-++---+---++----++----++-+-++++-++--+--	82.147	74	0.2417	291414
1	153980341	rs6703545	T	C	0.0115	-4.758	1.959e-06	+-++++-+?-+-++-+-+-+--+---?-------+-+-++---+----+-?--++----++-+--+++-++--+--	80.851	72	0.2223	288411
1	153981639	rs61542760	A	G	0.0116	-4.75	2.036e-06	+-++++-+?-+-++-+-+-+--+---?-------+-+-++---+---++-?--++----++-+--+++-++--+--	80.976	72	0.2195	288411
1	153982925	rs12408260	T	C	0.0114	-4.781	1.741e-06	+-++++-+?-+-++-+-+-+--+---?-------+-+-++---+----+-?---+----++-+--+++-++--+--	80.813	72	0.2232	288411
1	153986119	rs6672856	T	C	0.0113	-4.733	2.213e-06	+-++++-+?-+-++-+-+-+--+---?-------+-+-++---+----+-?---+----++-+--+++-++--+--	80.025	72	0.2418	288411
1	153986637	rs11264865	C	G	0.0114	4.736	2.175e-06	-+----+-?+-+--+-+-+-++-+++?+++++++-+-+--+++-++++-+?+++-++++--+-++---+--++-++	80.899	72	0.2212	288411
1	153987050	rs11264866	A	G	0.0114	-4.75	2.038e-06	+-++++-+?-+-++-+-+-+--+---?-------+-+-++---+---++-?---+----++-+--+++-++--+--	80.747	72	0.2247	288411
1	153987412	rs10796986	A	G	0.0114	-4.712	2.456e-06	+-++++-+?-+-++-+-+-+--+---?-------+-+-++---+----+-?---+----++-+--+++-++--+--	80.596	72	0.2282	288411
1	153988152	rs6679907	A	C	0.0114	-4.714	2.424e-06	+-++++-+?-+-++-+-+-+--+---?-------+-+-++---+----+-?---+----++-+--+++-++--+--	81.237	72	0.2136	288411
1	153989736	rs113165037	A	G	0.0113	4.756	1.976e-06	-+----+-?+-+--+-+-+-++-+++?+++++++-+-+--+++-++++-+?+++-++++--+-++---+--++-++	82.106	72	0.1947	288411
1	153990890	rs11264871	A	C	0.011	4.658	3.198e-06	-+----+-?+-+--+-+-+-++-+++?+++++++-+-+--+++-++++++?+++-++++--+-++---+--++-++	79.012	72	0.2671	288411
1	153990946	rs11264873	T	C	0.0114	-4.626	3.728e-06	+-++++-+?-+-++-+-+-+--+---?-------+-+-++---+------?---+----++-+--+++-++--+--	81.663	72	0.2042	288411
1	154575315	rs3738030	A	C	0.0077	5.044	4.56e-07	+0++?+-+?+++-+++?--?-?++---+-+++++++--+-++++++-++-?---++++-+++++++--++-+++++	66.28	69	0.5705	290604
1	156884584	rs56260937	T	C	0.0074	-4.446	8.759e-06	-+-++--+?-+--+++?+-?---+--+---------+++-----+--+----+++----+++-------+-+----	59.052	72	0.8632	291239
1	156886777	rs61546108	A	G	0.0078	-4.433	9.312e-06	-+-++--+?-++-+++?+-?---+--+---------+++-----+--+----++-----+++-------+-+----	60.014	72	0.8423	291239
1	156887101	rs2768746	A	G	0.0066	4.745	2.082e-06	+-+--++-?+-++---?++-+++-++-+++++++++---+++++-++-++++---++++--++++++++-+-++++	61.466	73	0.83	291334
1	156887580	rs2986717	T	C	0.0068	-4.742	2.121e-06	-+-++--+?-++-+++?--+---+--+---------+++-----+--+----+++----++--------+-+----	60.571	73	0.8503	291334
1	156888690	rs11264583	A	G	0.0073	4.679	2.884e-06	+-+--++-?+-++---?-+?+++-++-+++++++++---+++++-++-++++---++++---+++++++-+-++++	60.462	72	0.8319	291239
1	156890672	rs41273221	T	C	0.0072	4.721	2.342e-06	+-+--++-?+-++---?-+?+++-++-+++++++++---+++++-++-++++---++++---+++++++-+-++++	60.405	72	0.8333	291239
1	156891610	rs12143768	A	G	0.007	-4.68	2.87e-06	-+-++--+?-+--+++?+-?---+--+---------+++-----+--+----+++----+++---------+----	59.906	72	0.8447	291239
1	156892394	rs822436	T	C	0.0068	4.928	8.316e-07	+-+--++-?+-++---?++?+++-++++++++++++---+++++-++-++++---++++--++++++++++-++++	59.95	72	0.8437	291239
1	156892537	rs28454849	T	G	0.0071	-4.704	2.552e-06	-+-++--+?-+--+++?+-?---+--+---------+++-----+--+----+++----+++---------+----	59.825	72	0.8465	291239
1	156892949	rs822437	T	C	0.0064	4.875	1.09e-06	+-+--++-?+-++---?++?+++-++-+++++++++---+++++-++-++++---++++--++++++++-+-++++	60.083	72	0.8407	291239
1	156894613	rs12117221	T	G	0.007	-4.706	2.53e-06	-+-++--+?-+--+++?+-?---+--+---------+++-----+--+----+++----+++---------+----	59.692	72	0.8495	291239
1	156896561	rs11799423	A	T	0.007	-4.685	2.8e-06	-+-++--+?-+--+++?+-?---+--+---------+++-----+--+----+++----+++---------+----	60.417	72	0.833	291239
1	156898738	rs12402987	A	G	0.0071	-4.677	2.912e-06	-+-++--+?-+--+++?+-?---+--+---------+++-----+--+----+++----+++---------+----	61.238	72	0.8131	291239
1	156899288	rs11264584	A	G	0.0069	-4.621	3.826e-06	-+-++--+?-+--+++?+-?---+--+---------+++-----+--+----+++----+++---------+----	59.844	72	0.8461	291239
1	156899682	rs12122442	A	G	0.0069	-4.615	3.926e-06	-+-++--+?-+--+++?+-?---+--+---------+++-----+--+----+++----+++---------+----	59.973	72	0.8432	291239
1	156902222	rs12119908	A	G	0.0068	-4.483	7.345e-06	-+-++--+?-++-+++?+-?---+--+---------+++-----+--+----+++----+++---------+----	60.284	72	0.8361	291239
1	156902281	rs822431	T	G	0.0066	4.736	2.177e-06	+-+--++-?+--+---?++?+++-++-+++++++++---+++++-++-++++---++++--++++++++-+-++++	65.047	72	0.7065	291239
1	156904644	rs3187878	A	G	0.0069	4.623	3.79e-06	+-+--++-?+--+---?-+?+++-++-+++++++++---+++++-++-++++---++++---+++++++++-++++	60.896	72	0.8216	291239
1	156904818	rs6676	A	G	0.0068	-4.605	4.122e-06	-+-++--+?-++-+++?+-?---+--+---------+++-----+--+----+++----+++---------+----	60.595	72	0.8288	291239
1	156906881	rs2275198	A	G	0.007	-4.623	3.791e-06	-+-++--+?-++-+++?+-?---+--+---------+++-----+--+----+++----+++---------+----	61.299	72	0.8116	291239
1	156907031	rs4570419	T	C	0.0047	-4.627	3.707e-06	-+-??--+?-?+-??+?-??????-?+--??----?++?--?????-+-?-?????---++----???-?-?----	33.497	41	0.7911	261128
1	156907550	rs3765790	A	C	0.0069	-4.62	3.832e-06	-+-++--+?-++-+++?+-?---+--+---------+++-----+--+----+++----+++---------+----	60.582	72	0.8291	291239
1	156908986	rs3765788	T	C	0.0068	4.764	1.894e-06	+-+--+--?+--+---?++-++++++-+++++++++---+++++-++-++++---++++---+++++-+++-++++	66.08	73	0.7041	291334
1	156909303	rs3818807	A	T	0.0068	-4.604	4.138e-06	-+-++--+?-++-+++?+-?---+--+---------+++-----+--+----+++----+++---------+----	60.738	72	0.8254	291239
1	156909695	rs2275199	A	G	0.007	-4.655	3.232e-06	-+-++--+?-++-+++?+-?---+--+---------+++-----+--+----+++----+++---------+----	61.16	72	0.8151	291239
1	156910549	rs12406029	T	C	0.007	-4.683	2.821e-06	-+-++--+?-++-+++?+-?---+--+---------+++-----+--+----+++----+++---------+----	60.895	72	0.8216	291239
1	156911379	rs2275200	A	G	0.0065	4.984	6.217e-07	+-+--++-?+--+---?++?+++-++-+++++++++---+++++-++-++++---++++---+++++++++-++++	63.465	72	0.7534	291239
1	156913449	rs16837805	T	C	0.0064	-4.72	2.364e-06	-+-++--+?-++-+++?--?---+--+---------+++-----+--+----+++----++----------+----	61.835	72	0.7979	291239
1	156919180	rs12128868	A	G	0.0065	4.701	2.592e-06	+-+--++-?+--+---?++?+++-++-+++++++++---+++++-++-++++---++++--++++++++++-++++	61.704	72	0.8013	291239
1	156925435	rs2275204	T	C	0.0066	4.63	3.656e-06	+-+--++-?+--+---?++?+++-++-+++++++++---+++++-++-++++---++++--++++++++++-++++	62.166	72	0.7893	291239
1	156928776	rs1572409	A	T	0.0066	4.624	3.773e-06	+-+--++-?+--+---?++?+++-++-+++++++++---+++++-++-++++---++++--++++++++-+-++++	61.163	72	0.815	291239
1	156929594	rs1537848	T	C	0.0066	4.639	3.504e-06	+-+--++-?+--+---?++?+++-++-+++++++++---+++++-++-++++---++++--++++++++-+-++++	61.096	72	0.8167	291239
1	156930053	rs56372341	T	C	0.0066	-4.634	3.595e-06	-+-++--+?-++-+++?--?---+--+---------+++-----+--+----+++----++--------+-+----	61.075	72	0.8172	291239
1	156933962	rs11806313	A	G	0.0067	4.62	3.836e-06	+-+--++-?+--+---?++?+++-++-+++++++++---+++++-++-++++---++++--++++++++-+-++++	61.069	72	0.8173	291239
1	156939067	rs2275206	A	G	0.007	-4.557	5.184e-06	-+-++--+?-++-+++?--?---+--+---------+++-----+--+----+++----+++-------+++----	57.282	72	0.8971	291239
1	156940325	rs12134308	A	G	0.007	4.66	3.158e-06	+++--++-?+--+---?++?+++-++-+-+++++++---+++++-++-++++---++++--++++++++---++++	59.739	72	0.8485	291239
1	156941412	rs12136088	T	G	0.0071	4.663	3.119e-06	+-+--++-?+--+---?-+?+++-++-+++++++++---+++++-++-++++---++++---+++++++-+-++++	56.775	72	0.9057	291239
1	156943412	rs6670563	T	C	0.0071	-4.597	4.292e-06	---++--+?-++-+++?--?---+--+-+-------+++-----+--+----+++----++--------+++----	59.491	72	0.8539	291239
1	156945926	rs6680488	T	C	0.0071	-4.572	4.83e-06	---++--+?-++-+++?--?---+--+-+-------+++-----+--+----+++----++--------+++----	60.311	72	0.8355	291239
1	156945989	rs6695497	T	G	0.0071	4.591	4.405e-06	+++--++-?+--+---?++?+++-++-+-+++++++---+++++-++-++++---++++--++++++++---++++	59.741	72	0.8484	291239
1	156946898	rs1006168	T	G	0.0071	4.593	4.378e-06	+++--++-?+--+---?++?+++-++-+-+++++++---+++++-++-++++---++++--++++++++---++++	59.646	72	0.8505	291239
1	156947358	rs7415766	A	C	0.0073	-4.614	3.948e-06	-+-++--+?-++-+++?--?---+--+---------+++-----+--+----+++----+++-------+-+----	57.841	72	0.887	291239
1	156947928	rs16837897	T	C	0.0071	4.569	4.893e-06	+++--++-?+--+---?++?+++-++-+-+++++++---+++++-++-++++---++++--++++++++---++++	59.823	72	0.8466	291239
1	156947953	rs12141806	A	T	0.0071	4.611	4.011e-06	+++--++-?+--+---?++?+++-++-+++++++++---+++++-++-++++---++++---+++++++-+-++++	57.433	72	0.8944	291239
1	156949713	rs68091809	T	C	0.0071	4.579	4.675e-06	+++--++-?+--+---?++?+++-++-+-+++++++---+++++-++-++++---++++--++++++++---++++	60.236	72	0.8372	291239
1	156950795	rs6674659	A	G	0.0073	4.604	4.151e-06	+++--++-?+--+---?++?+++-++-+++++++++---+++++-++-++++---++++---+++++++-+-++++	58.038	72	0.8834	291239
1	156952142	rs1572415	A	G	0.007	4.566	4.961e-06	+++--++-?+--+---?++?+++-++-+-+++++++---+++++-++-++++---++++--++++++++---++++	60.742	72	0.8253	291239
1	156954433	rs7541702	T	C	0.0072	4.625	3.743e-06	+++--++-?+--+---?++?+++-++-+++++++++---+++++-++-++++---++++---+++++++-+-++++	58.711	72	0.8702	291239
1	156955284	rs12120517	T	C	0.007	-4.55	5.365e-06	---++--+?-++-+++?--?---+--+-+-------+++-----+--+----+++----++--------+++----	60.69	72	0.8265	291239
1	156956261	rs3737600	A	G	0.007	-4.537	5.697e-06	---++--+?-++-+++?--?---+--+-+-------+++-----+--+----+++----++--------+++----	60.49	72	0.8313	291239
1	156957242	rs12141337	A	T	0.0072	4.565	4.987e-06	+++--++-?+--+---?++?+++-++-+++++++++---+++++-++-++++---++++---+++++++-+-++++	58.373	72	0.8769	291239
1	156961142	rs12120457	T	C	0.0069	-4.563	5.05e-06	---++--+?-++-+++?--?---+--+-+-------+++-----+--+----+++----++--------+++----	59.889	72	0.8451	291239
1	156962191	rs4292955	T	G	0.0079	-4.589	4.451e-06	---++--+?-++-+++?+-?---+--+---------+++-----+--+----+++----+++-------+++----	57.973	72	0.8846	291239
1	156962206	rs4275447	T	G	0.0071	4.555	5.241e-06	+++--++-?+--+---?++-+++-++-+-+++++++---+++++-++-++++---++++--++++++++---++++	61.178	73	0.8367	291334
1	156963724	rs12143045	T	C	0.0069	4.57	4.874e-06	+++--++-?+--+---?++?+++-++-+-+++++++---+++++-++-++++---++++--++++++++---++++	59.84	72	0.8462	291239
1	156963874	rs1572414	T	C	0.0069	4.559	5.129e-06	+++--++-?+--+---?++?+++-++-+-+++++++---+++++-++-++++---++++--++++++++---++++	60.132	72	0.8396	291239
1	156963975	rs1572413	A	G	0.0069	-4.573	4.818e-06	---++--+?-++-+++?--?---+--+-+-------+++-----+--+----+++----++--------+++----	59.683	72	0.8497	291239
1	156968568	rs869724	T	C	0.0069	-4.555	5.235e-06	---++--+?-++-+++?--?---+--+-----+---+++-----+--+----+++----+++-------+-+----	56.654	72	0.9076	291239
1	156968745	rs869723	A	T	0.0068	4.579	4.671e-06	+++--++-?+--+---?++?+++-++-+++++-+++---+++++-++-++++---++++---+++++++-+-++++	56.181	72	0.9151	291239
1	156971607	rs16837947	T	G	0.0068	-4.544	5.518e-06	---++--+?-++-+++?--?---+--+-+-------+++-----+--+----+++----++--------+++----	59.416	72	0.8555	291239
1	156975807	rs864266	T	C	0.0066	4.571	4.856e-06	+++--++-?+--+---?++?+++-++-+-+++++++---+++++-++-++++---++++--++++++++---++++	58.848	72	0.8675	291239
1	156976225	rs822581	T	C	0.0066	4.529	5.937e-06	+++--++-?+--+---?++?+++-++-+-+++++++---+++++-++-++++---++++--++++++++---++++	58.861	72	0.8672	291239
1	156982896	rs11264597	A	G	0.0067	4.595	4.333e-06	+++--++-?+--+---?++?+++-++-+-+++++++---+++++-++-++++---++++--++++++++---++++	58.507	72	0.8743	291239
1	156984101	rs9787126	A	G	0.0072	4.598	4.268e-06	+++--+++?+--+---?++?+++-++-+++++++++---+++++-++-++++---++++---+++++++-+-++++	57.793	72	0.8879	291239
1	156984850	rs716724	A	G	0.0078	-4.501	6.772e-06	---++---?-++-+++?--?---+--+---------+++-----+--+----+++----+++-------+-+----	57.517	72	0.8929	291239
1	156985430	rs12405102	C	G	0.0072	-4.618	3.871e-06	---++---?-++-+++?--?---+--+---------+++-----+--+----+++----+++-------+-+----	58.577	72	0.8729	291239
1	156988332	rs9787405	A	G	0.0071	-4.637	3.53e-06	---++---?-++-+++?--?---+--+---------+++-----+--+----+++----+++-------+-+----	57.896	72	0.886	291239
1	156991309	rs12125109	A	C	0.0072	4.625	3.75e-06	+++--+++?+--+---?++?+++-++-+++++++++---+++++-++-++++---++++---+++++++-+-++++	57.883	72	0.8863	291239
1	157005358	rs12411007	T	C	0.0071	-4.617	3.89e-06	-+-++--+?-++-+++?+-?---+--+-+-------+++-----+--+----+++----+++-------+-+----	58.474	72	0.875	291239
1	157013161	rs58782148	T	C	0.0072	4.647	3.364e-06	+-+--++-?+--+---?-+?+++-++-+-+++++++---+++++-++-++++---++++---+++++++-+-++++	57.729	72	0.8891	291239
1	157017405	rs12403413	A	C	0.0072	-4.703	2.567e-06	---++---?-++-+++?+-?---+--+-+-------+++-----+--+----+++----+++-------+-+----	57.99	72	0.8843	291239
1	157022296	rs6427341	A	C	0.0072	4.667	3.06e-06	+++--+++?+--+---?-+?+++-++-+-+++++++---+++++-++-++++---++++---+++++++-+-++++	58.24	72	0.8795	291239
1	157023173	rs1853966	T	C	0.0073	-4.64	3.481e-06	---++---?-++-+++?--?---+----+-------+++-----+-------+++----+++-------+-+----	57.687	72	0.8899	291239
1	157029199	rs11264607	A	G	0.0076	4.535	5.759e-06	+++--++-?+--+---?++?+++-++++-+++++++---+++++-++-++++---++++---+++++++-+-++++	57.305	72	0.8967	291239
1	157034313	rs10908529	A	G	0.0069	-4.511	6.441e-06	---++--+?-++-+++?--?---+-+?-+-------+++-----+--+----+++----+++-------+-+----	58.085	71	0.8645	288673
1	157044651	rs12134439	T	C	0.0069	-4.531	5.884e-06	+--++--+?-++-+++?--?---+-+?-+-------+++-----+--+----+++----+++-------+-+----	57.184	71	0.8825	288673
1	166167723	rs115688341	A	C	0.0002	4.619	3.855e-06	?????????+??????????????+????????+???+??????????????????????????????????++-+	10.128	7	0.1815	210144
1	166246495	rs150778975	A	C	0.0005	4.597	4.286e-06	?????????-??????????????+????????+???+??????????????????????????????????++-+	12.199	7	0.0942	210144
1	173429995	rs12140760	A	G	0.0112	-4.595	4.322e-06	-+--+-+----+--+--+--+-----+++-+---+++++-+-++---+----++----++--+--+--------+-	60.484	75	0.8881	300486
1	173683954	rs10798295	T	C	0.0144	4.443	8.87e-06	++++--++-++--+-+--++--+++-+----+++-+-+++-++++++--++-++++++--+++++++++++-+--+	79.242	75	0.3467	300486
1	173709616	rs10912676	T	G	0.0145	-4.492	7.063e-06	----++--+--++-+-++--++---+-++++---+-+---+------++--+------++-----------+-++-	80.288	75	0.317	300486
1	173783493	rs7544605	T	C	0.0146	-4.425	9.639e-06	----++--+--++-+-++--++---+-++++---+-+---+------++--+------++-----------+-++-	80.142	75	0.321	300486
1	173831882	rs2208849	A	G	0.0169	-5.387	7.167e-08	---+--+-?---+-+-+-++----++-++-+---+++-+++--+----+-++------+------------+--+-	64.62	74	0.7736	291414
1	174050667	rs10158289	A	G	0.016	-5.255	1.483e-07	--------+-+-+-+-+-+-----++-++++---+++--++--+---++++++-----+-----------+-----	68.831	75	0.6785	300486
1	174057626	rs6668959	T	C	0.0163	5.257	1.464e-07	++++++++-+-+-+-+-+-+++++--+----+++---++--++-+++------+++++-+++++++++++-+++++	70.224	75	0.6345	300486
1	174059043	rs6685314	A	G	0.0161	-5.283	1.272e-07	--------+-+-+-+-+-+-----++-++++---+++--++--+---+++++0-----+-----------+-----	68.851	75	0.6778	300486
1	174060062	rs12563301	A	G	0.0159	-5.283	1.271e-07	--------+-+-+-+-+-+-----++-++++---+++--++--+---+++++0-----+-----------+-----	68.462	75	0.6898	300486
1	174062911	rs7553788	T	C	0.0159	-5.296	1.185e-07	--------+-+-+-+-+-+-----++-++++---+++--++--+---++++++-----+-----------+-----	68.66	75	0.6837	300486
1	174064481	rs4652169	A	T	0.016	5.287	1.242e-07	++++++++-+-+-+-+-+-+++++--+----+++---++--++-+++------+++++-+++++++++++-+++++	68.901	75	0.6763	300486
1	174066947	rs6682017	T	C	0.0159	5.298	1.17e-07	++++++++-+-+-+-+-+-+++++--+----+++---++--++-+++------+++++-+++++++++++-+++++	68.938	75	0.6751	300486
1	174068049	rs2145376	A	G	0.0159	5.296	1.181e-07	++++++++-+-+-+-+-+-+++++--+----+++---++--++-+++------+++++-+++++++++++-+++++	68.6	75	0.6856	300486
1	174068929	rs6663794	A	G	0.0159	5.299	1.166e-07	++++++++-+-+-+-+-+-+++++--+----+++---++--++-+++------+++++-+++++++++++-+++++	68.569	75	0.6865	300486
1	174069421	rs6691711	T	C	0.016	5.29	1.226e-07	++++++++-+-+-+-+-+-+++++--+----+++---++--++-+++------+++++-+++++++++++-+++++	68.826	75	0.6786	300486
1	174069981	rs6658769	T	C	0.0159	-5.302	1.146e-07	--------+-+-+-+-+-+-----++-++++---+++--++--+---++++++-----+-----------+-----	68.551	75	0.6871	300486
1	174072203	rs10912730	A	G	0.017	-5.263	1.42e-07	--------+-+-+-+-+-+-----++-++++---+++--++--+---++++++----++-----------+-----	68.933	75	0.6753	300486
1	174075924	rs2860846	T	G	0.0173	-5.212	1.868e-07	------+-+-+-+-+-+-+-----++-++++---+++-+++--+---++++++-----+-----------+---+-	68.652	75	0.684	300486
1	174075925	rs2860847	T	C	0.0183	-5.173	2.307e-07	------+-+-+-+-+-+-+-----++-++++---+++-+++--+---++++++-----+-----------+---+-	68.951	75	0.6747	300486
1	174076864	rs6672986	C	G	0.0158	5.299	1.166e-07	++++++++-+-+-+-+-+-++++++-+----+++---+---++-+++------+++++-+++++++++++-+++-+	68.438	75	0.6905	300486
1	174078417	rs7533430	A	G	0.0158	5.309	1.105e-07	++++++++-+-+-+-+-+-++-+++-+----+++---+---++-+++------+++++-+++++++++++-+++-+	68.807	75	0.6792	300486
1	174078860	rs7526024	T	C	0.0158	-5.301	1.155e-07	--------+-+-+-+-+-+------+-++++---+++-+++--+---++++++-----+-----------+---+-	68.181	75	0.6984	300486
1	174079584	rs12079062	A	T	0.0176	-5.195	2.047e-07	------+-+-+++-+-+-+------+-++++---+++-+++--+---++++++----++-----------+---+-	67.187	75	0.7279	300486
1	174079585	rs12079063	A	G	0.0176	-5.204	1.954e-07	------+-+-+++-+-+-+------+-++++---+++-+++--+---++++++-----+-----------+---+-	67.308	75	0.7244	300486
1	174079700	rs12094341	C	G	0.0163	-5.267	1.385e-07	--------+-+-+-+-+-+------+-++++---+++-+++--+---++++++----++-----------+---+-	68.892	75	0.6765	300486
1	174084104	rs4650945	A	G	0.0158	5.296	1.183e-07	++++++++-+-+-+-+-+-++++++-+----+++---+---++-+++------+++++-+++++++++++-+++-+	68.386	75	0.6921	300486
1	174086292	rs60354115	T	C	0.0197	5.2	1.996e-07	++++++-+-+-+-+-+-+-++++++-+----+++---+---++-+++------+++++-+++++++++++-+++-+	68.991	75	0.6735	300486
1	174093837	rs12085290	T	G	0.0163	-5.343	9.135e-08	------+-+-+-+-+-+-+-----++-++++---+++-+++--+---++++++-----+-----------+---+-	71.649	75	0.5883	300486
1	174104743	rs2901785	A	G	0.0151	5.323	1.022e-07	++++++-+-+++-+-+-+-+++++--+----+++---+---++-+++------+++++-+++++++++++-+++-+	68.788	75	0.6798	300486
1	174111115	rs10912734	T	C	0.016	5.272	1.347e-07	++++++-+-+-+-+-+-+-++++++-+----+++---+---++-+++------+++++-+++++++++++-+++-+	68.836	75	0.6783	300486
1	174113408	rs6425274	A	G	0.0159	-5.291	1.216e-07	------+-+-+-+-+-+-+------+-++++---+++-+++--+---++++++-----+-----------+---+-	68.92	75	0.6757	300486
1	174118271	rs9700722	C	G	0.0171	5.268	1.376e-07	++++++-+-+---+-+-+-++++++-+----+++---+---++-+++------+++++-+++++++++++-+++-+	68.622	75	0.6849	300486
1	174119038	rs6696076	A	G	0.0158	5.272	1.35e-07	++++++-+-+-+-+-+-+-+++++--+----+++---+---++-+++------+++++-+++++++++++-+++-+	68.95	75	0.6748	300486
1	174127022	rs2294492	A	T	0.0159	5.323	1.021e-07	++++++-+-+-+-+-+-+-++++++-+----+++---+---++-+++------+++++-+++++++++++-+++-+	69.418	75	0.6601	300486
1	174128994	rs57919173	A	G	0.016	-5.277	1.311e-07	------+-+-+-+-+-+-+------+-++++---+++--++--+---++++++-----+-----------+---+-	69.239	75	0.6657	300486
1	174146656	rs10912739	A	C	0.0159	-5.291	1.218e-07	------+-+-+-+-+-+-+------+-++++---+++-+++--+---+++?++-----+-----------+---+-	68.629	74	0.6545	300049
1	174150850	rs4652234	T	C	0.0156	-5.315	1.067e-07	------+-+-+-+-+-+-+------+-++++---+++-+++--+---+++?+------+-----------+---+-	68.778	74	0.6498	300049
1	174152476	rs6658543	T	C	0.0156	-5.316	1.062e-07	------+-+-+-+-+-+-+------+-++++---+++-+++--+---+++?+------+-----------+---+-	68.401	74	0.6617	300049
1	174152688	rs6656188	A	G	0.0159	-5.273	1.344e-07	------+-+-+-+-+-+-+------+-++++---+++-+++--+---+++?++-----+-----------+---+-	69.459	74	0.6278	300049
1	174157834	rs12087441	A	G	0.0158	5.299	1.166e-07	++++++-+-+-+-+-+-+-++++++-+----+++---+---++-+++---?--+++++-+++++++++++-+++-+	68.538	74	0.6574	300049
1	174158856	rs4652237	T	C	0.0158	-5.305	1.126e-07	------+-+-+-+-+-+-+------+-++++---+++-+++--+---+++?++-----+-----------+---+-	68.449	74	0.6602	300049
1	174161430	rs2143114	A	G	0.0158	5.302	1.143e-07	++++++-+-+-+-+-+-+-++++++-+----+++---+---++-+++---?--+++++-+++++++++++-+++++	68.416	74	0.6613	300049
1	174168805	rs4442420	T	G	0.013	5.187	2.14e-07	++++++++-++--++--+-+++++--+----+++--+++--++-++++-+?--++++--+++++++++++-++--+	77.968	74	0.3538	300049
1	174170005	rs12691474	T	C	0.0124	-5.314	1.073e-07	--------+--+---++-+---+--+-++++---++---++--+----+-?++----++-----------+--++-	77.416	74	0.3702	300049
1	174170341	rs6681618	T	C	0.0156	-5.283	1.268e-07	------+-+-+-+-+-+-+------+-++++---+++-+++--+---+++?++-----+-----------+---+-	69.607	74	0.623	300049
1	174176363	rs7537517	A	G	0.0154	-5.251	1.512e-07	------+-+-+-+-+-+-+------+-++++---+++-+++--+---+++?++-----+-----------+---+-	68.015	74	0.6739	300049
1	174181885	rs4447042	T	C	0.0129	5.188	2.121e-07	++++++++-++--++--+-+++++--+----+++--+++--++-++++-+?--++++--+++++++++++-++--+	78.314	74	0.3436	300049
1	174189269	rs56188862	T	C	0.0134	-5.152	2.582e-07	--------+--++--++-+-----++-++++---++---++--+---++-?++----++-----------+--++-	79.672	74	0.3053	300049
1	174191694	rs9787001	T	C	0.0155	-5.349	8.845e-08	------+-+-+-+-+-+-+------+-++++---+++-+++--+---+++?++-----+-----------+---+-	69.076	74	0.6402	300049
1	174197408	rs972361	A	G	0.0156	-5.35	8.818e-08	------+-+-+-+-+-+-+------+-++++---+++-+++--+---+++?++-----+-----------+---+-	68.956	74	0.644	300049
1	174209909	rs12079820	T	C	0.0128	-5.187	2.143e-07	--------+--++--++-+---+-++-++++---++---++--+----+-?++----++-----------+--++-	78.636	74	0.3343	300049
1	174212761	rs6667267	A	G	0.0155	5.327	9.975e-08	++++++-+-+-+-+-+-+-++++++-+----+++---+---++-+++---?--+++++-+++++++++++-+++-+	68.382	74	0.6623	300049
1	174218572	rs4652274	T	C	0.0128	-5.169	2.357e-07	--------+--++--++-+-----++-++++---++---++--+----+-?++----++-----------+--++-	78.489	74	0.3386	300049
1	174224994	rs2064149	C	G	0.0155	5.319	1.046e-07	++++++-+-+-+-+-+-+-++++++-+----+++---+---++-+++---?--+++++-+++++++++++-+++-+	68.894	74	0.646	300049
1	174230469	rs6681390	A	G	0.0203	-5.247	1.545e-07	------+-+-+-+-+-+-+------+-++++---+++--++--+---++++++-----+-----------+---+-	69.934	75	0.6438	300486
1	174241165	rs4652294	C	G	0.0202	5.243	1.578e-07	++++++-+-+-+-+-+-+-++++++-+----+++---++--++-+++------+++++-+++++++++++-+++-+	69.985	75	0.6421	300486
1	174246712	rs6670617	A	C	0.0203	5.28	1.291e-07	++++++-+-+-+-+-+-+-++++++-+----+++---++--++-+++------+++++-+++++++++++-+++++	69.38	75	0.6613	300486
1	174258877	rs4650989	A	G	0.0211	5.303	1.14e-07	++++++-+-+-+-+-+-+-++++++-+----+++---++--++-+++------+++++-+++++++++++-+++-+	69.855	75	0.6463	300486
1	174259081	rs4650990	A	G	0.021	5.275	1.329e-07	++++++-+-+-+-+-+-+-++++++-+----+++---++--++-+++------+++++-+++++++++++-+++-+	70.602	75	0.6224	300486
1	174266642	rs7555067	T	C	0.0208	5.303	1.138e-07	++++++-+-+-+-+-+-+-++++++-+----+++---++--++-+++------+++++-+++++++++++-+++-+	70.129	75	0.6376	300486
1	174272225	rs6695636	C	G	0.0208	5.269	1.37e-07	++++++-+-+-+-+-+-+-++++++-+----+++---++--++-+++------+++++-+++++++++++-+++-+	70.189	75	0.6356	300486
1	174281604	rs10912761	A	T	0.0206	-5.222	1.773e-07	------+-+-+-+-+-+-+-----++-++++---+++--++--+---++++++-----+-----------+---+-	70.894	75	0.6129	300486
1	174288602	rs7512930	A	G	0.0202	-5.35	8.781e-08	------+-+-+-+-+-+-+------+-++++---+++--++--+---++++++-----+-----------+---+-	69.706	75	0.651	300486
1	174288802	rs7523460	T	G	0.0205	5.248	1.542e-07	++++++-+-+-+-+-+-+-++++++-+----+++---++--++-+++------+++++-+++++++++++-+++-+	70.308	75	0.6318	300486
1	174290274	rs10158115	T	C	0.0205	-5.262	1.424e-07	------+-+-+-+-+-+-+------+-++++---+++--++--+---++++++-----+-----------+---+-	70.052	75	0.64	300486
1	174290781	rs7552830	T	C	0.0205	5.262	1.427e-07	++++++-+-+-+-+-+-+-++++++-+----+++---++--++-+++------+++++-+++++++++++-+++-+	70.118	75	0.6379	300486
1	174296511	rs7523938	T	C	0.0206	-5.262	1.428e-07	------+-+-+-+-+-+-+------+-++++---+++--++--+---++++++-----+-----------+---+-	69.935	75	0.6437	300486
1	174298118	rs6681780	A	G	0.0206	5.245	1.564e-07	++++++-+-+-+-+-+-+-++++++-+----+++---++--++-+++------+++++-+++++++++++-+++-+	70.358	75	0.6302	300486
1	174304067	rs57366619	A	C	0.0207	5.239	1.619e-07	++++++-+-+-+-+-+-+-++++++-+----+++---++--++-+++------+++++-+++++++++++-+++-+	70.898	75	0.6128	300486
1	174312813	rs17301013	T	C	0.0179	5.263	1.419e-07	++++++-+-+-+-+-+-+-++++++-+----+++---+---++-+++---?-0+++++-+++++++++++-+++-+	68.209	74	0.6678	300049
1	174325566	rs2049991	A	G	0.0169	-5.013	5.364e-07	--------+--++--++-+---+-++-+++++--++---++--+----+-?++----++------+----+--++-	77.66	74	0.3629	300049
1	174325692	rs2049992	A	G	0.0178	-5.247	1.545e-07	------+-+-+-+-+-+-+------+-++++---+++-+++--+---+++?+0-----+-----------+---+-	68.353	74	0.6632	300049
1	174326702	rs6666767	A	G	0.0177	-5.246	1.553e-07	------+-+-+-+-+-+-+------+-++++---+++-+++--+---+++?+0-----+-----------+---+-	68.44	74	0.6605	300049
1	174333818	rs6693423	T	G	0.0175	-5.212	1.866e-07	------+-+-+-+-+-+-+------+-++++---+++-+++--+---+++?+------+-----------+---+-	68.006	74	0.6742	300049
1	174343705	rs10912773	A	G	0.0154	4.964	6.892e-07	++++++++-++--++--+-+++-+--------++--+++--++-++++-+?--++++--++++++-++++-++--+	77.825	74	0.358	300049
1	174345097	rs60363188	T	C	0.0168	5.189	2.114e-07	++++++-+-+-+-+-+-+-++++++-+----+++---+---++-+++---?-++++++-+++++++++++-+++-+	67.892	74	0.6777	300049
1	174346276	rs12084119	T	G	0.0168	5.199	2.007e-07	++++++-+-+-+-+-+-+-++++++-+----+++---+---++-+++---?-++++++-+++++++++++-+++-+	67.926	74	0.6767	300049
1	174380810	rs7548540	A	G	0.0155	-5.23	1.693e-07	------+-+-+-+-+-+-+------+-++++---+++-+++--+---+++?+------+-----------+---+-	67.107	74	0.7019	300049
1	174383680	rs7523263	A	G	0.0155	5.224	1.747e-07	++++++-+-+-+-+-+-+-++++++-+----+++---+---++-+++---?-++++++-+++++++++++-+++-+	68.18	74	0.6687	300049
1	174387855	rs6425279	A	G	0.0156	-5.221	1.782e-07	------+-+-+-+-+-+-+------+-++++---+++-+++--+---+++?+------+-----------+---+-	66.966	74	0.7062	300049
1	174390997	rs6663591	A	C	0.0133	-5.024	5.071e-07	--------+--++--++-+-----++-+++++--++---++--+----+-?++----++------+----+--++-	76.909	74	0.3856	300049
1	174391324	rs6425280	A	G	0.0165	-4.901	9.513e-07	------+-+---+---+-+-----++-++++---++--+++--++---+-?+------+-----------+---+-	63.765	74	0.7962	300049
1	174401963	rs2006197	T	C	0.0134	-4.982	6.282e-07	--------+--++-+++-+-----++-+++++--++---++--+----+-?++----++------+----+--++-	75.97	74	0.4148	300049
1	174411645	rs12077622	A	G	0.016	4.902	9.485e-07	++++++-+-+++-+-+-+-+++++--+----+++--++---++--+++-+?-++++++-+++++++++++-+++-+	64.692	74	0.7717	300049
1	174412540	rs6664764	A	G	0.0169	4.86	1.172e-06	++++++-+-+++-+-+-+-+++++--+----+++---+---++--+++-+?-++++++-+++++++++++-+++-+	65.466	74	0.7502	300049
1	174418922	rs6425281	C	G	0.0163	4.884	1.041e-06	++++++-+-+-+-+-+-+-+++++--+----+++--++---++--+++-+?-++++++-+++++++++++-+++-+	64.144	74	0.7863	300049
1	174434332	rs12568655	A	G	0.0132	5.066	4.066e-07	++++++++-++--+---+-+++++--+-----++--+++--++-++++-+?--+++++-++++++-++++-++--+	76.244	74	0.4062	300049
1	174444552	rs3737651	T	G	0.0163	4.855	1.204e-06	++++++-+-+-+-+-+-+-+++++--+----+++--++---++--+++--?-++++++-+++++++++++-+++-+	63.325	74	0.8073	300049
1	174447588	rs10218528	A	T	0.0152	4.717	2.388e-06	++++++++-++--+---+-+++-+--+--+--++--+++--++-++++-+?--++++--??++++-++++-++--+	70.553	72	0.5262	298659
1	174462525	rs6425282	T	C	0.0163	4.864	1.152e-06	++++++-+-+-+-+-+-+-+++++--+----+++--++---++--+++--?-++++++-+++++++++++-+++-+	63.366	74	0.8063	300049
1	174465164	rs727279	A	G	0.0164	-4.836	1.326e-06	------+-+-+-+-+-+-+-----++-++++---++--+++--++---++?+------+-----------+---+-	63.866	74	0.7936	300049
1	174466377	rs7521870	A	T	0.02	5.042	4.612e-07	++++++++-++--+---+-+++-+--+-----++--+++--++-++++-+---+++++-++++++-++++-++--+	77.763	75	0.3908	300486
1	174468991	rs6425283	T	C	0.0164	-4.859	1.179e-06	------+-+-+-+-+-+-+-----++-++++---++--+++--++---++?+------+-----------+-----	63.557	74	0.8015	300049
1	174479324	rs2072760	A	G	0.0221	4.807	1.529e-06	++++++-+-+-+-+-+-+-+++++--+----+++--++---++--+++----++++++-+++++++++++-+++-+	65.453	75	0.7764	300486
1	174480363	rs10912797	T	C	0.0221	4.808	1.527e-06	++++++-+-+-+-+-+-+-+++++--+----+++--++---++--+++----++++++-+++++++++++-+++-+	65.419	75	0.7773	300486
1	174484277	rs6668053	A	G	0.0225	4.833	1.342e-06	++++++-+-+-+-+-+-+-+++++--+----+++--++---++--+++----++++++-+++++++++++-+++++	64.789	75	0.7938	300486
1	174496550	rs10912804	A	G	0.0224	-4.858	1.183e-06	------+-+-+-+-+-+-+-----++-++++---++--+++--++---++++------+-----------+-----	64.871	75	0.7917	300486
1	174497642	rs12088073	A	C	0.0225	-4.809	1.519e-06	------+-+-+-+-+-+-+-----++-++++---++--+++--++---++++------+-----------+-----	65.215	75	0.7827	300486
1	174502150	rs6693225	A	G	0.0207	5.08	3.77e-07	++++++++-++-++---+-+++-+--+-----++--+++--++-++++-+---++++--++++++-++++-++--+	78.946	75	0.3554	300486
1	174516366	rs10912807	T	C	0.0226	-4.875	1.088e-06	------+-+-+-+-+-+-+------+-++++---++--+++--++---++++------+-----------+-----	64.556	75	0.7998	300486
1	174521519	rs11804541	T	C	0.023	4.836	1.324e-06	++++++-+-+-+-+++-+-+++++--+----+++--++---++--+++-+--++++++-++-++++++++-+++-+	64.565	75	0.7995	300486
1	174533614	rs56347239	A	G	0.0224	4.868	1.126e-06	++++++-+-+-+-+++-+-++++++-+----+++--++---++--+++----++++++-+++++++++++-+++-+	64.999	75	0.7884	300486
1	174534242	rs7542389	A	G	0.0224	-4.82	1.439e-06	------+-+-+-+---+-+------+-++++---++--+++--++---++++------+-----------+---+-	64.884	75	0.7914	300486
1	174534906	rs12074753	A	G	0.0225	4.876	1.081e-06	++++++-+-+-+-+++-+-++++++-+----+++--++---++--+++----++++++-+++++++++++-+++-+	65.163	75	0.7841	300486
1	174535402	rs6425287	A	T	0.0221	-4.874	1.092e-06	------+-+-+-+-+-+-+------+-++++---++--+++--++---++++------+-----------+---+-	64.936	75	0.79	300486
1	174539790	rs1016466	A	C	0.0225	4.859	1.182e-06	++++++-+-+-+-+++-+-++++++-+----+++--++---++--+++----++++++-+++++++++++-+++-+	65.93	75	0.7635	300486
1	174543850	rs2038025	A	G	0.0212	5.025	5.036e-07	++++++++-++-+++--+-+++-+--+-----++--+++--++-++++-----++++--++++++-++++-++--+	78.616	75	0.3651	300486
1	174549940	rs10753086	A	G	0.0224	4.917	8.772e-07	++++++-+-+-+-+++-+-++++++-+----+++--++---++--+++----++++++-+++++++++++-+++-+	65.367	75	0.7787	300486
1	174559121	rs7555533	A	C	0.0225	-4.89	1.007e-06	------+-+-+-+---+-+-----++-++++---++--+++--++---++++------+-----------+-----	65.637	75	0.7715	300486
1	174572859	rs6671824	T	C	0.0225	4.877	1.075e-06	++++++-+-+-+-+++-+-+++++--+----+++--++---++--+++----++++++-+++++++++++-+++++	65.601	75	0.7725	300486
1	174573154	rs6672148	C	G	0.0224	-4.885	1.032e-06	------+-+-+-+---+-+-----++-++++---++--+++--++---++++------+-----------+-----	65.482	75	0.7757	300486
1	174576480	rs10912813	T	G	0.0224	4.878	1.071e-06	++++++-+-+-+-+++-+-+++++--+----+++--++---++--+++----++++++-+++++++++++-+++++	65.993	75	0.7618	300486
1	174585186	rs61826916	T	C	0.0215	-5.101	3.38e-07	--------+--+---++-+---+-++-+++++--++---++--+----+++++----++------+----+0-++-	78.899	75	0.3567	300486
1	174585257	rs67967476	C	G	0.0227	-4.892	9.97e-07	------+-+-+-+---+-+-----++-++++---++--+++--++---++++------+-----------+-----	65.566	75	0.7734	300486
1	174586753	rs6683602	A	C	0.0227	4.897	9.731e-07	++++++-+-+-+-+++-+-+++++--+----+++--++---++--+++----++++++-+++++++++++-+++++	65.596	75	0.7726	300486
1	174586998	rs6696197	A	G	0.0226	-4.903	9.444e-07	------+-+-+-+---+-+-----++-++++---++--+++--++---++++------+-----------+-----	65.59	75	0.7728	300486
1	174587502	rs6425292	A	G	0.0105	-4.674	2.95e-06	???--???+?+??--?+?+-----++???++??-?+??++?--++---++??----???--????-----?-----	38.255	45	0.7513	244476
1	174587683	rs12060177	A	C	0.0228	-4.939	7.872e-07	------+-+-+-+---+-+-----++-++++---++--+++--++---++++------+-----------+-----	64.994	75	0.7885	300486
1	174592050	rs6664864	A	G	0.0206	-4.813	1.489e-06	------+-+-+-+---+-+-----++?++++---++--+++--++---++++------+-----------+-----	64.935	74	0.765	297920
1	174593212	rs11804941	T	C	0.0228	4.886	1.031e-06	++++++-+-+-+-+++-+-+++++--+----+++--++---++--+++----++++++-+++++++++++-+++++	66.575	75	0.7455	300486
1	174594984	rs10912824	A	G	0.0222	-5.121	3.04e-07	--------+--+---++-+---+-++-+++++--++---++--+----+-+++----++------+----+0-++-	79.143	75	0.3496	300486
1	174608734	rs6689170	T	C	0.0217	-4.911	9.054e-07	------+-+-+-+---+-+-----++-++++---++--+++--++---++++------+-----------+-----	65.432	75	0.777	300486
1	174621625	rs332805	T	C	0.0217	4.951	7.381e-07	++++++-+-+-+-+++-+-+++++--+----+++--++---++--+++----++++++-+++++++++++-+++++	64.706	75	0.796	300486
1	174650649	rs332770	A	C	0.0169	-4.939	7.861e-07	------+-+-+-+---+-+-----++-++++---++--+++--++---++?+------+-----------+-----	65.045	74	0.762	300049
1	174664849	rs332773	A	G	0.0172	4.939	7.846e-07	++++++-+-+-+-+-+-+-+++++--+----+++--++---++--+++--?-++++++-+++++++++++-+++++	65.238	74	0.7566	300049
1	174667585	rs56291114	T	C	0.0016	4.494	6.976e-06	??+????++-+??-???-??????-???+-?+++??-+?+-++??+?????++-?++?+??++-????+-+?++++	39.668	35	0.2697	274736
1	174673279	rs332771	A	G	0.0165	-4.912	9.022e-07	------+-+-+-+-+-+-+-----++-++++---++--+++--++---++?+------+-----------+-----	65.447	74	0.7507	300049
1	174675218	rs444678	T	C	0.0172	4.93	8.217e-07	++++++-+-+-+-+-+-+-+++++--+----+++--++---++--+++--?-++++++-+++++++++++-+++++	65.378	74	0.7527	300049
1	174676432	rs333418	T	C	0.0158	5.136	2.803e-07	++++++++-++-++---+-+++-+--+-----++--+++--++-++++--?--++++--++++++-++++--+--+	78.436	74	0.3401	300049
1	174678922	rs332791	A	G	0.0168	4.848	1.248e-06	++++++-+-+---+-+-+-+++++--+----+++--++---++--+++--?-++++++-+++++++++++-+++++	67.16	74	0.7003	300049
1	174688398	rs332783	A	G	0.0165	5.116	3.126e-07	++++++++-++-++---+-+++-+--+-----++---++--++-++++--?--+++++-++++++-++++-0+--+	78.856	74	0.3281	300049
1	174689925	rs170768	T	C	0.0162	5.043	4.576e-07	++++++++-++-++---+-+++++--+-----++--+++--++-++++--?--++++--++++++-++++-++--+	80.088	74	0.294	300049
1	174695923	rs332795	T	C	0.0169	-4.821	1.426e-06	------+-+-+-+-+-+-+-----++-++++---++--+++--++---++?+------+-----------+-----	65.465	74	0.7502	300049
1	174696280	rs332796	T	G	0.0165	-5.05	4.426e-07	--------+--+--+++-+---+-++-+++++--++---++--+---++-?++----++------+----+0-++-	80.358	74	0.2868	300049
1	174700248	rs332799	T	G	0.0171	-5.032	4.841e-07	--------+--+--+++-+---+-++-+++++--++---++--+---++-?++----++------+----+0-++-	79.601	74	0.3072	300049
1	174704892	rs332789	C	G	0.0166	4.814	1.48e-06	++++++-+-+-+-+-+-+-+++++--+----+++--++---++--+++--?-++++++-+++++++++++-+++++	65.73	74	0.7427	300049
1	174705489	rs461910	T	C	0.0171	-4.711	2.468e-06	------+-+-+-+-+-+-+-----++-++++---++--+++--++---++?+------+--+--------+-----	67.351	74	0.6945	300049
1	174731596	rs1754351	A	G	0.0167	-4.898	9.697e-07	------+-+-+-+-+-+-+-----++-++++---++--+++---+---++?+------+-----------+-----	67.458	74	0.6912	300049
1	174737697	rs1793300	T	C	0.0177	-4.825	1.398e-06	------+-+-+-+-+-+-+-----++-++++---++--+++---+---++?+------+--+--------+-----	66.412	74	0.7228	300049
1	174739486	rs1653626	A	G	0.0164	4.695	2.66e-06	++++++-+-+-+-+-+-+-+++++--+----+++--++---+++-+++--?-++++++-+++++++++++-+++++	67.273	74	0.6969	300049
1	174741017	rs1653627	A	G	0.0179	4.667	3.06e-06	++++++-+-+-+-+-+-+-+++++--+----+++--++---++--++---?-++++++-++-++++++++-+++++	64.348	74	0.7809	300049
1	174743589	rs1793293	T	G	0.016	-4.864	1.153e-06	--------+--++-+++-+---+-++-+++++--++--+++--+---++-?++----++-----------+0-+--	79.468	74	0.3109	300049
1	174753549	rs1793297	A	G	0.0194	4.565	4.996e-06	++++++-+-+-+-+-+-+-+++++--+----+++--++---++--++---?-++++++-+++++++++++-+++++	64.226	74	0.7842	300049
1	174755597	rs1653632	T	C	0.0185	-4.588	4.474e-06	------+-+-+-+-+-+-+-----++-++++---++--+++--++--+++?+------+-----------+-----	64.17	74	0.7856	300049
1	174757959	rs7538650	T	C	0.0168	-4.842	1.282e-06	--------+--++--++-+---+-++-++++---+++-+++--++---++?++----++-----------++-++-	83.575	74	0.209	300049
1	174762839	rs3118980	T	C	0.0182	-4.598	4.259e-06	------+-+-+++-+-+-+-----++-++++---++--+++---+---++?+------+??+--------+-----	66.929	72	0.6469	298659
1	174764608	rs1793319	A	G	0.0169	4.878	1.072e-06	++++++++-++-+++--+-+++-+--+----+++---+---++--+++--?--++++--+++++++++++--+--+	84.297	74	0.1937	300049
1	174770191	rs2987874	A	G	0.0186	-4.712	2.453e-06	------+-+-+-+-+-+-+-----++-++++---++--+++---+---++?+------+-----------+-----	67.572	74	0.6877	300049
1	174775874	rs4233195	A	T	0.0194	-4.624	3.756e-06	------+-+-+-+-+-+-+-----++-++++---++--+++--++--+++?+------+-----------+-----	65.542	74	0.748	300049
1	174776545	rs1754355	A	G	0.0193	4.651	3.303e-06	++++++-+-+-+-+-+-+-+++++--+----+++--++---++--++---?-++++++-+++++++++++-+++++	64.987	74	0.7636	300049
1	174788685	rs3133270	T	C	0.0211	4.644	3.425e-06	++++++-+-+-+-+-+-+-+++++--+----+++--++---+++-+++----++++++-+++++++++++-+++++	66.768	75	0.74	300486
1	174789407	rs2987869	T	G	0.0216	-4.576	4.739e-06	------+-+-+-+-+-+-+-----++-++++---++--+++--++--+++++------+-----------+-----	64.647	75	0.7974	300486
1	174791813	rs1793291	T	C	0.0174	-4.807	1.529e-06	--------+--+---++-+---+-++-++++---+++-+++--++---++?++----++-----------++-++-	82.161	74	0.2413	300049
1	174795337	rs1793309	T	C	0.0182	-4.497	6.901e-06	------+-+-+-+---+-+-----++?++++---++--+++--++---++++------+-----------+-----	64.682	74	0.7719	297920
1	174806801	rs1754349	T	C	0.0156	-4.484	7.324e-06	------+-+-+++-+-+-+-----++?++++---++--+++--++---++?+------+-----------+-----	63.623	73	0.7752	297483
1	174811177	rs1894200	A	G	0.0118	-4.675	2.938e-06	--------+--++--++-+---+-++?++++---+++-+++--++---++?++----++------+----++-++-	84.119	73	0.1757	297483
1	174811651	rs2187562	C	G	0.0158	4.53	5.909e-06	++++++-+-+-+-+-+-+-+++++--?----+++--++---++--++---?-++++++-+++++++++++-+++++	64.448	73	0.7523	297483
1	174818547	rs3018410	A	G	0.0154	4.518	6.245e-06	++++++-+-+-+-+++-+-+++++--?----+++--++---++--++---?-++++++-+++++++++++-+++++	64.349	73	0.7551	297483
1	174832827	rs7545910	A	G	0.0136	4.599	4.254e-06	++++++-+-+-+-+++-+-+++++--?----+++---+---++--++---?-++++++-+++++++++++-+++++	66.747	73	0.6835	297483
1	174835432	rs2981894	A	T	0.0146	4.563	5.043e-06	++++++-+-+-+-+++-+-+++++--?----+++--++---++--+++--?-++++++-+++++++++++-+++++	64.657	73	0.7463	297483
1	174835839	rs913685	T	C	0.0122	-4.748	2.054e-06	--------+--++--++-+---+-++?++++---+++-+++--++---++?++----++------+----++-++-	81.271	73	0.2373	297483
1	174857981	rs6658861	A	G	0.0125	4.754	1.992e-06	++++++-+-++-+++--+-+++-+--?----+++---+---++--++---?--+++++-++++++-++++--+--+	80.839	73	0.2477	297483
1	174880809	rs4650666	A	T	0.0139	-4.772	1.827e-06	--------+--+---++-+---+-++-++++---+++-+++--++---++?++-----+-+---------+0-++-	79.166	74	0.3193	300049
1	174884161	rs6688577	T	C	0.0139	4.758	1.952e-06	++++++++-++-+++--+-+++-+--+----+++---+---++--+++--?--+++++-+-+++++++++-0+--+	77.672	74	0.3626	300049
1	175727238	rs487948	C	G	0.007	-4.684	2.813e-06	----+-+-++--+-++-+++++++-+?--+-+--+++++---+---++-+?--+-++-------++++++------	85.886	73	0.1437	297483
1	175727522	rs540811	A	T	0.0069	-4.551	5.331e-06	----+---++--+--+-+++++++-+?--+-+--+++++---+---++-+---+-++-------++++++------	86.617	74	0.1498	297920
1	175727540	rs540754	A	C	0.0069	4.466	7.959e-06	++++-+++--++-++-+-------+-?++-+-++-----+++-+++--+-+++-+--+++++++------++++++	86.385	74	0.1538	297920
1	175727712	rs538998	A	T	0.0185	4.934	8.037e-07	+-?+-+-?-+++-+--??--+?--+-?++-+-++---+-+-+-++++-+-?++++-++++-++++-----++++++	71.325	68	0.3678	289286
1	175728110	rs535335	T	C	0.0073	4.588	4.48e-06	++++-+-+--++-+--+-------+-?++-+-++-----+++-+++--+-+++-+--+++++++------++++++	87.794	74	0.1305	297920
1	175728599	rs509822	A	G	0.0072	4.589	4.451e-06	++++-+-+--++-+--+-------+-?++-+-++-----+++-+++--+-+++-+--+++++++------++++++	87.367	74	0.1372	297920
1	175729567	rs479987	T	C	0.0087	-4.655	3.238e-06	----+-+-++--+-++-+++++++-+---+-+--+++++-+-+---++-+---+-++-------++++++------	87.502	75	0.1532	300486
1	175729585	rs479282	A	G	0.0087	-4.639	3.499e-06	----+-+-++--+-++-+++++++-+---+-+--+++++-+-+---++-+---+-++-------++++++------	86.464	75	0.1721	300486
1	175729970	rs641991	T	C	0.0087	4.668	3.045e-06	++++-+-+--++-+--+-------+-+++-+-++-----+-+-+++--+-+++-+--+++++++------++++++	87.282	75	0.1571	300486
1	175730383	rs561334	T	C	0.0072	-4.53	5.89e-06	----+-+-++--+-++-+++++++-+?--+++--+++++---+---++-+---+-++-------++++++------	86.122	74	0.1585	297920
1	175730747	rs558413	T	G	0.0072	-4.572	4.828e-06	----+-+-++--+-++-+++++++-+?--+-+--+++++-+-+---++-+---+-++-------++++++------	87.136	74	0.141	297920
1	175730762	rs558360	T	G	0.0087	-4.657	3.202e-06	----+-+-++--+-++-+++++++-+---+-+--+++++-+-+---++-+---+-++-------++++++------	87.26	75	0.1575	300486
1	175730941	rs656837	C	G	0.0087	-4.661	3.15e-06	----+-+-++--+-++-+++++++-+---+-+--+++++-+-+---++-+---+-++-------++++++------	85.747	75	0.186	300486
1	175731505	rs669355	T	G	0.0088	4.635	3.561e-06	++++-+-+--++-+--+-------+-+++---++-----+-+-+++--+-+++-+--+++++++------++++++	87.11	75	0.1602	300486
1	175731846	rs671000	T	C	0.0088	4.677	2.91e-06	++++-+-+--++-+--+-------+-+++-+-++-----+-+-+++--+-+++-+--+++++++------++++++	88.951	75	0.1295	300486
1	175732289	rs501915	T	C	0.0078	-4.609	4.049e-06	----+---++--+-++-+++++++-+---+-+--+++++---+---++-++--+-++-------++++++------	86.418	75	0.1729	300486
1	175732870	rs2986121	A	T	0.0088	4.69	2.732e-06	++++-+-+--++-+--+-------+-+++-+-++-----+++-+++--+--++-+--+++++++------++++++	85.83	75	0.1844	300486
1	175737528	rs580712	T	C	0.0083	-4.591	4.402e-06	----+---++--+--+-+++++++-+---+-+--+++-+-+-+---++-++--+-++-------++++++------	87.072	75	0.1608	300486
1	175737814	rs625178	T	C	0.0086	4.721	2.343e-06	++++-+++--++-++-+-------+-+++-+-++---+-+++-+++--+-+++-+--+++++++------++++++	88.681	75	0.1337	300486
1	175740624	rs58209612	A	C	0.0115	4.667	3.061e-06	++++-+-+--++-++-+-------+-+++---++---+-+-+-+++--+-+++-+--+++++++------++++++	86.583	75	0.1698	300486
1	175741678	rs1819266	T	C	0.0112	4.603	4.158e-06	++++-+++--++-++-+-------+-+++-+-++---+-+-+-+++--+-+++-+--+++++++------++++++	87.401	75	0.155	300486
1	175743011	rs4639716	C	G	0.0115	4.605	4.12e-06	++++-+++--++-++-+-------+-+++-+-++---+-+-+-+++--+-+++-+--+++++++------++++++	87.167	75	0.1591	300486
1	175743434	rs34769313	T	G	0.0115	-4.61	4.034e-06	----+---++--+--+-+++++++-+---+-+--+++-+-+-+---++-+---+-++-------++++++------	87.304	75	0.1567	300486
1	175743575	rs61148850	A	G	0.0118	4.632	3.616e-06	++++-+-+--++-++-+-------+-+++---++---+-+-+-+++--+-+++-+--+++++++------++++++	86.162	75	0.1779	300486
1	175743694	rs1325913	T	G	0.0115	-4.603	4.17e-06	----+---++--+--+-+++++++-+---+-+--+++-+-+-+---++-+---+-++-------++++++------	87.263	75	0.1574	300486
1	175744041	rs1325914	A	C	0.0115	4.567	4.956e-06	++++-+++--++-++-+-------+-+++-+-++---+-+-+-+++--+-+++-+--+++++++------++++++	87.47	75	0.1538	300486
1	175744280	rs12040251	T	G	0.0112	5.039	4.69e-07	++++-+++-+-+++--?---+?--+-+++++-++---+-+-+++++--+--++++-+++++++++-----++++++	68.769	73	0.6185	300314
1	175744966	rs2182310	T	C	0.0116	4.613	3.964e-06	++++-+++--++-++-+-------+-+++-+-++---+-+-+-+++--+-+++-+--+++++++------++++++	86.781	75	0.1662	300486
1	175744990	rs2182311	A	G	0.0116	4.621	3.81e-06	++++-+++--++-++-+-------+-+++-+-++---+-+-+-+++--+-+++-+--+++++++------++++++	86.964	75	0.1628	300486
1	175746251	rs4652118	A	G	0.0117	4.711	2.461e-06	++++-+++--++-++-+-------+-+++-+-++---+-+-+-+++--+-+++-+--+++++++------++++++	86.345	75	0.1743	300486
1	175746354	rs4652119	T	C	0.0118	4.665	3.089e-06	++++-+-+--++-++-+-------+-+++---++---+-+-+-+++--+-+++-+--+++++++------++++++	85.662	75	0.1877	300486
1	175746836	rs6677856	T	C	0.0117	4.596	4.31e-06	++++-+++--++-++-+-------+-+++-+-++---+-+-+-+++--+-+++-+--+++++++------++++++	88.534	75	0.136	300486
1	175746951	rs4421556	A	C	0.01	-4.504	6.66e-06	----+---++--+--+-+++++++-++--+-+--+++-+-+-+---++-+---+-++-------++++++------	86.437	75	0.1726	300486
1	175747140	rs4462099	T	C	0.0102	4.538	5.672e-06	++++-+++--++-++-+-------+-+++-+-++---+-+-+-+++--+-+++-+--+++++++------++++++	85.328	75	0.1945	300486
1	175750068	rs10913078	T	C	0.0109	-5.135	2.817e-07	--------++-----+?+++-?++-+---+-+--+++-+-+------+-+-----+---------+++++------	70.982	73	0.5451	300314
1	175750389	rs12142588	A	G	0.0092	-4.973	6.585e-07	--------++-----+?+++-+++-+?--+-+--+++-+-+-0----+-+-----+---+-----+++++------	73.591	73	0.4586	297840
1	175750840	rs7544599	T	C	0.0111	-5.199	2e-07	--------++-----+?+++-+++-+---+-+--+++-+-+------+-+-----+---------+++++------	72.052	74	0.5424	300406
1	175750942	rs7544686	C	G	0.0111	5.205	1.943e-07	++++++++--+++++-?---+---+-+++-+-++---+-+-++++++-+-+++++-+++++++++-----++++++	71.697	74	0.5542	300406
1	175752187	rs1409142	A	G	0.0113	-5.267	1.389e-07	--------++-----+?+++-+++-+---+-+--+++-+-+------+-+-----+---------+++++------	72.395	74	0.5311	300406
1	175753286	rs7528236	A	G	0.01	-4.931	8.2e-07	----+---++--+--+-+++++-+-++--+++--+++++-+-+---++-+---+-++-------++++++------	80.749	75	0.3043	300486
1	175753601	rs10913079	T	C	0.0116	5.276	1.322e-07	++++++++---+++--?-+-+---+-+++-+-++---+-+-++++++-+-+++++-+++++++++-----++++++	70.239	74	0.6024	300406
1	175753695	rs1359585	A	G	0.0117	5.267	1.385e-07	++++-+++---+++--?-+-+---+-+++-+-++---+-+-++++++-+-+++++-+++++++++-----++++++	70.829	74	0.5829	300406
1	175753766	rs1359586	A	T	0.0116	5.272	1.347e-07	++++++++---+++--?-+-+---+-+++-+-++---+-+-++++++-+-+++++-+++++++++-----++++++	69.854	74	0.615	300406
1	175754405	rs942955	C	G	0.0117	4.791	1.662e-06	++++-+++--++-++-+-------+-+++---++---0-+-+-+++--+-+++-+--+++++++------++++++	82.346	75	0.2626	300486
1	175754469	rs942956	A	G	0.0116	-4.788	1.687e-06	----+---++--+--+-+++++++-+---+++--+++++-+-+---++-+---+-++-------++++++------	82.452	75	0.26	300486
1	175754620	rs942957	T	C	0.0116	-4.797	1.611e-06	----+---++--+--+-+++++++-+---+++--+++++-+-+---++-+---+-++-------++++++------	82.295	75	0.2639	300486
1	175755901	rs1359587	A	G	0.0117	-4.778	1.77e-06	----+---++--+--+-+++++++-+---+++--+++++-+-+---++-+---+-++-------++++++------	82.271	75	0.2645	300486
1	175756501	rs1409143	T	C	0.0117	-4.793	1.646e-06	----+---++--+--+-+++++++-+---+-+--+++++-+-0---++-+---+-++-------++++++------	82.893	75	0.2492	300486
1	175756706	rs6425361	T	C	0.0117	4.772	1.822e-06	++++-+++--++-++-+-------+-+++-+-++-----+-+-+++--+-+++-+--+++++++------++++++	82.883	75	0.2494	300486
1	175756889	rs7515842	T	C	0.0117	4.773	1.817e-06	++++-+++--++-++-+-------+-+++-+-++-----+-+-+++--+-+++-+--+++++++------++++++	82.967	75	0.2474	300486
1	175757018	rs7546985	T	C	0.0117	-4.764	1.901e-06	----+---++--+--+-+++++++-+---+-+--+++++-+-+---++-+---+-++-------++++++------	82.749	75	0.2526	300486
1	175757057	rs7547063	T	C	0.0114	-5.171	2.334e-07	----+---++-----+?+++-+++-+---+-+--+++-+-+------+-+-----+---------+++++------	71.409	74	0.5638	300406
1	175758222	rs4650929	A	G	0.0117	-4.763	1.906e-06	----+---++--+--+-+++++-+-+---+-+--+++++-+-+---++-+---+-++-------++++++------	83.319	75	0.239	300486
1	175759071	rs6667697	T	C	0.0102	4.834	1.336e-06	++++++-+---+++--?-+-+?+-+-+++-+-++---+-+-++++++-+-+++-++++---+++--+---++++++	61.13	73	0.8378	300314
1	175759292	rs6676267	C	G	0.0115	-4.707	2.517e-06	----+---++--+--+-+++++-+-+---+-+--+++-+-+-----++-+---+-++-------++++++------	85.579	75	0.1894	300486
1	175759323	rs6667913	T	C	0.01	4.832	1.353e-06	++++++-+---+++--?-+-+?+-+-+++-+-++---+-+-++++++-+-+++-++++---+++--+---++++++	60.348	73	0.8551	300314
1	175763358	rs7537751	A	T	0.0099	-4.756	1.97e-06	------+-+++---++?+-+-?-+-+---+-+--+++-+-+------+-+---+----+++---++-+++------	59.864	73	0.8652	300314
1	175763650	rs34010246	A	T	0.011	5.115	3.138e-07	++++++++--++++--?---+---+-+++-+-++---+-+-++++++-+-+++++-++++++++------++++++	73.186	74	0.5049	300406
1	175765614	rs6699546	A	G	0.0117	-4.774	1.807e-06	----+---++--+-++-+++++-+-+---+-+--+++++-+-+---++-+---+-++-------++++++------	85.581	75	0.1894	300486
1	175766103	rs1925947	A	C	0.0098	-4.735	2.193e-06	------+-+++---++?+-+-?-+-+---+-+--+++-+-+------+-+--------+++---++-+++------	58.083	73	0.8987	300314
1	175768340	rs1575824	T	C	0.0097	4.708	2.496e-06	++++++-+---+++--?-+-+?+-+-+++-+-++---+-+-++++++-+-++++++++---+++--+---++++++	58.197	73	0.8967	300314
1	175768520	rs1575825	C	G	0.0111	5.118	3.089e-07	++++++++--++++--?---+---+-+++-+-++---+-+-++++++-+-+++++-+++++++++-----++++++	72.915	74	0.5139	300406
1	175769259	rs7537684	T	C	0.0112	5.064	4.105e-07	++++++++--++++--?---+---+-+++-+-++---+-+-++++++-+--++++--+++++++------++++++	72.732	74	0.5199	300406
1	175771306	rs942958	T	C	0.0111	-5.157	2.507e-07	--------++----++?+++-+-+-+---+-+--+++-+-+------+-+-----+---+-----+++++------	73.405	74	0.4977	300406
1	175771412	rs959850	T	C	0.0117	-4.785	1.709e-06	----+---++--+--+-+++++-+-++--+-+--+++++-+-0---++-+---+-++-------++++++------	85.546	75	0.1901	300486
1	175772378	rs7535559	T	C	0.0111	-5.141	2.739e-07	--------++----++?+++-+-+-+---+-+--+++-+-+------+-+-----+---+-----+++++------	73.282	74	0.5017	300406
1	175774543	rs6425362	T	G	0.0112	-5.192	2.078e-07	--------+++---++?+++-+++-+---+-+--+++-+-+------+-+---------+-----+++++------	70.498	74	0.5939	300406
1	175775838	rs12023065	A	G	0.0111	-5.161	2.45e-07	--------++----++?+++-+-+-+---+-+--+++-+-+------+-+-----+---+-----+++++------	73.126	74	0.5069	300406
1	175777467	rs2901984	C	G	0.0201	5.4	6.674e-08	++++++++--++++--?---+-+-+-+++-+-++---+-++++++++-+-+++++-++--+++++-----++++++	75.907	74	0.4168	300406
1	175777601	rs2090977	T	C	0.0096	4.75	2.038e-06	++++++-+---+++--?-+-+?+-+-+++-+-++--++-+-++++++-+-++++++++---+++--+---++++++	58.574	73	0.8901	300314
1	175778973	rs990707	C	G	0.0097	-4.774	1.803e-06	------+-+++---++?+-+-?-+-+---+-+--++--+-+------+-+--------+++---++--++------	58.001	73	0.9001	300314
1	175779491	rs1340998	A	C	0.0098	4.733	2.213e-06	++++++-+---+++--?-+-+?+-+-+++0+-++--++-+-++++++-+-++++++++---+++--++--++++++	57.664	73	0.9057	300314
1	175780523	rs2209558	A	C	0.0098	4.763	1.911e-06	++++++-+---+++--?-+-+?+-+-+++0+-++--++-+-++++++-+-++++++++---+++--++--++++++	58.17	73	0.8972	300314
1	175780852	rs2222419	A	G	0.0097	-4.753	2.008e-06	------+-+++---++?+-+-?-+-+---+-+--+++-+-+------+-+--------+++---++--++------	58.808	73	0.8858	300314
1	175784378	rs6656072	T	C	0.0092	-4.704	2.55e-06	------+-+++---++?+-+-?-+-+-----+--++--+-+------+-+--------+++---++-+++------	58.416	73	0.8929	300314
1	175787440	rs7516044	A	G	0.0107	4.755	1.988e-06	++++-+-+--++-+--+-----+-+-+++---++-----+-+++++--+-+++-+--+++++++------++++++	80.853	75	0.3015	300486
1	175788318	rs547353	T	C	0.0108	-4.957	7.158e-07	----+-+-++--+-++-+-+++-+-+---+++--+++-+-+-----++-+---+-++-------++++++------	80.618	75	0.3079	300486
1	175788387	rs1522638	A	G	0.0104	4.79	1.67e-06	++++-+-+--++-+--+-----+-+-+++---++-----+-+++++--+-+++-+--+++++++------++++++	81.031	75	0.2967	300486
1	175789371	rs1916052	T	C	0.0096	-4.678	2.896e-06	----+---++--+-++-+++++-+-+---+-+--+++++-+-----++-+---+-++-------++++++------	84.179	75	0.2192	300486
1	175789641	rs1925946	T	C	0.0109	4.933	8.085e-07	++++-+++-+++++--+-----+-+-+++---++---+-+-+++++--+-+++-+--+++++++------++++++	82.063	75	0.2697	300486
1	175790147	rs1610270	T	C	0.0104	4.852	1.223e-06	++++-+++-+++++--+-----+-+-+++---++-----+-+++++--+-+++-+--+++++++------++++++	81.4	75	0.2869	300486
1	175791913	rs7531762	T	C	0.0101	4.8	1.59e-06	++++-+++--++-+--+-----+-+-+++-+-++-----+-+++++--+-+++-+--+++++++------++++++	81.496	75	0.2844	300486
1	175798702	rs515007	A	C	0.008	4.913	8.97e-07	++++-+++-+-+++--?-+--?+-+-+++++-++--++-+-++++++-+-+++-++++--++++--++--++++++	57.402	73	0.9099	300314
1	175801732	rs10798417	A	G	0.0091	-4.781	1.747e-06	----+---++--+-++-+++++-+-+---+++--+++++-+-+---+--+---+-++-------++++++------	84.163	75	0.2196	300486
1	175807049	rs1750293	T	G	0.0079	5.127	2.944e-07	++++-+-+-+-+++--?-+--?+-+-+++++-++--++-+-++++++-+-+++-++++--++++--++--++++++	58.582	73	0.8899	300314
1	175809524	rs4652130	T	G	0.0096	-4.926	8.377e-07	----+-+-+------+-+++++-+-+---+++--+++---+-----++-+---+-++-------++++++------	82.706	75	0.2537	300486
1	175817502	rs566433	C	G	0.0073	5.22	1.788e-07	++++-+-+---+++--?-+--?+-+-+++++-++--++-+-++++++-+-+++-++++--++++--++--++++++	60.676	73	0.848	300314
1	175817853	rs485526	T	C	0.0074	5.165	2.411e-07	++++-+-+---+++--?-+--?+-+-+++++-++--++-+-++++++-+-+++-++++--++++--++--++++++	60.692	73	0.8476	300314
1	175820514	rs860895	A	G	0.0077	4.895	9.827e-07	++++-+++---+++--?-+-+?+-+-+++++-++--++-+-+++++--+-+++++-++--++++--+--+++++++	63.182	73	0.7871	300314
1	181535715	rs78382112	A	G	0.0053	5.428	5.697e-08	-+-??-?-+-+--+-+?-????+?--+--++++--+-+--++-?+----+-+-+++--+-?-++++?-++-?++-+	83.873	62	0.03363	297972
1	181554288	rs75989267	C	G	0.0046	5.369	7.899e-08	+++??-?-+-+--+-+?-????+?+-+--+++++---+--+--?+----+-+-++0+-+-?-+++-?-+++?++-+	76.891	62	0.09648	297972
1	181557765	rs78031703	A	G	0.0046	-5.394	6.905e-08	+--??+?+---++-+-?+????-?-+-++-----+++-++-++?--+++-+-+--+-+-+?+---+?+---?--+-	77.244	62	0.09188	297972
1	181563569	rs6682268	A	G	0.0046	5.341	9.221e-08	+++??-?-+++--+-+?-????+?+-+--+++++---+--+--?++---+-+-++-+-+-?-+++-?-+++?++-+	78.555	62	0.07629	297972
1	181565381	rs78714585	T	G	0.0046	-5.34	9.3e-08	---??+?+---++-+-?+????-?-+-++-----+++-++-++?--++--+-+--+-+-+?+---+?+---?--+-	79.147	62	0.07	297972
1	181565561	rs75157181	C	G	0.0045	5.328	9.917e-08	+++??-?-+++--+-+?-????+?+-+--+++++---+--+--?++---+-+-++-+-+-?-+++-?-+++?++-+	79.832	62	0.06326	297972
1	181565805	rs75442690	C	G	0.0046	-5.34	9.272e-08	---??+?+---++-+-?+????-?-+-++-----+++-++-++?--+++-+-+--+-+-+?+---+?+---?--+-	79.87	62	0.06291	297972
1	181566045	rs111434161	A	C	0.0046	-5.331	9.767e-08	---??+?+---++-+-?+????-?-+-++-----+++-++-++?--+++-+-+--+-+-+?+---+?+---?--+-	79.918	62	0.06245	297972
1	181567592	rs76237040	A	G	0.0045	-5.323	1.018e-07	---??+?+---++-+-?+????-?-+-++-----+++-++-++?--+++-+-+--+-+-+?+---+?+---?--+-	79.13	62	0.07018	297972
1	181567942	rs79696802	T	C	0.0045	5.313	1.077e-07	+++??-?-+++--+-+?-????+?+-+--+++++---+--+--?++---+-+-++-+-+-?-+++-?-+++?++-+	79.11	62	0.07038	297972
1	181574733	rs79521202	T	C	0.0045	5.274	1.333e-07	+++??-?-+++--+-+?-????+?+-+--+++++---+--+--?+----+-+-++-+-+-?-+++-?-+++?++-+	78.381	62	0.07822	297972
1	181575749	rs74684129	A	G	0.0045	-5.349	8.859e-08	---??+?+---++-+-?+????-?-+-++-----+++-++-++?-++++-+-+--+-+-+?+---+?+---?--+-	78.497	62	0.07694	297972
1	181575783	rs78297457	T	C	0.0045	-5.39	7.045e-08	---??+?+---++-+-?+????-?-+-++-----+++-++-++?-++++-+-+--+-+-+?+---+?+---?--+-	77.712	62	0.08604	297972
1	181581706	rs6671804	T	C	0.0045	-5.354	8.581e-08	---??+?+---++-+-?+????-?-+-++-----+++-++-++?-++++-+-+--+-+-+?+---+?+---?--+-	78.816	62	0.07346	297972
1	181581923	rs6659139	T	C	0.0045	5.115	3.141e-07	++-??-?-+++--+-+?-????+?+-+--+++++---+--+--?+----+-+-++-+-+-?-+++-?-+++?++-+	77.878	62	0.08404	297972
1	181582147	rs73057733	T	C	0.0045	-5.096	3.462e-07	--+??+?+---++-+-?+????-?-+-++-----+++-++-++?-++++-+-+--+-+-+?+---+?+---?--+-	77.891	62	0.08389	297972
1	181582188	rs75881005	T	C	0.0045	5.338	9.408e-08	+++??-?-+++--+-+?-????+?+-+--+++++---+--+--?+----+-+-++-+-+-?-+++-?-+++?++-+	80.087	62	0.06089	297972
1	181584804	rs79383623	A	G	0.0044	-5.138	2.773e-07	--+??+?+---++-+-?+????-?-+-++-----+++-++-++?-++++-+-+--+-+-+?+---+?+---?--+-	80.497	62	0.05724	297972
1	181585367	rs76856191	A	G	0.0046	5.449	5.053e-08	+++??-?-+++--+-+?-????+?+-+--+++++---+--+--?+----+-++++-+-+-?-+++-?-++-?++-+	79.913	62	0.0625	297972
1	181596678	rs76628057	T	G	0.0044	5.318	1.049e-07	-++??-?-+++--+-+?-????+?--+--+++++---+--+--?+----+-++++-+-+-?-+++-?-++-?++-+	80.86	62	0.05417	297972
1	181596751	rs75500877	T	C	0.0044	5.41	6.311e-08	-++??-?-+++--+-+?-????+?--+--+++++---+--+--?+----+-++++-+-+-?-+++-?-++-?++-+	80.286	62	0.0591	297972
1	181600958	rs75318603	T	G	0.0044	-5.325	1.008e-07	+--??+?+---+--+-?+????-?++-++-----+++-++-++?-++++-+----+-+-+?+---+?+--+?--+-	80.912	62	0.05374	297972
1	181602603	rs75558526	T	G	0.0042	5.111	3.208e-07	+++??-?-+++--+-+?-????+?--+--+++++---+--+--?+----+-++++-+-+-?-+++-?-++-?++-+	83.168	62	0.03771	297972
1	181603120	rs199914	T	G	0.0048	-5.068	4.013e-07	+--??+?+---++-+-?+????-?-+-++-----+++-++-++--++++-+----+-+-+?+---+?+---?--+-	81.013	63	0.06285	298706
1	181605677	rs80280348	A	G	0.0042	5.184	2.175e-07	-++??-?-+++--+-+?-????+?--+--+++++---+--+--?+0---+-++++---++?-+++-?-++-?++-+	82.82	62	0.03987	297972
1	181607138	rs199968	C	G	0.0044	-5.065	4.078e-07	+--??+?+---++-+-?+????-?++-++-----+++-++-++?+++++-+----+-+--?+---+?+--+?--+-	82.482	62	0.04208	297972
1	181609963	rs74687674	A	C	0.0041	-5.102	3.354e-07	---??+?+---++-+-?+????-?++-++-----+++-++-++?-++++-+----+-+--?+---+?+--+?--+-	81.568	62	0.04858	297972
1	181609979	rs74783731	T	C	0.0041	-5.117	3.1e-07	---??+?+---++-+-?+????-?++-++-----+++-++-++?-++++-+----+-+--?+---+?+--+?--+-	82.962	62	0.03898	297972
1	181613579	rs6697425	A	G	0.0048	4.766	1.879e-06	-+-??-?-+++--+++?-+???-?+-+--+++++-+---+++-+++--++-++++-----+-+++++-++-?++-+	95.564	66	0.01011	299371
1	181616025	rs73059762	T	C	0.004	5.064	4.099e-07	+++??-?-+++--+-+?+????+?+-+--+++++---+-++--?+----+-++++-+-+-?-+++-?-++-?++-+	83.773	62	0.03419	297972
1	181617016	rs73059771	A	G	0.004	5.024	5.068e-07	+++??-?-+++--+-+?-????+?+-+--+++++---+-++--?+----+-++++-+-+-?-+++-?-++-?++-+	83.329	62	0.03674	297972
1	181621734	rs58637548	A	G	0.0041	4.886	1.03e-06	+++??-?-+++--+-+?-????+?+-+--+++++---+-++--?+----+-++++-+-+-?-+++-?-++-?+--+	81.423	62	0.04967	297972
1	181621794	rs57700975	A	G	0.0041	4.883	1.045e-06	+++??-?-+++--+-+?-????+?+-+--+++++---+-++--?+----+-++++-+-+-?-+++-?-++-?+--+	81.372	62	0.05007	297972
1	181621810	rs60245169	A	G	0.0047	-4.853	1.213e-06	---??+?+---++-+-?+????-?-+-++-----+++-+--++--++++-+----+-+-+?+---+?+--+?-++-	83.416	63	0.04356	298706
1	181621968	rs60693565	A	G	0.004	-4.799	1.594e-06	---??+?+---++-+-?+????-?-+-++-----+++-+--++?-++++-+----+-+-+?+---+?+--+?-++-	80.917	62	0.0537	297972
1	181622824	rs4083386	T	C	0.0045	-4.921	8.602e-07	---??+?+---++-+-?+????-?-+-++-----+++-+--++?-++++-+----+-+-+?+---+?+--+?-++-	82.832	62	0.0398	297972
1	181623296	rs7542103	A	G	0.004	-5.047	4.479e-07	---??+?+---++-+-?+????-?++-++-----+++-+--++?-++++-+----+-+-+?+---+?+--+?--+-	82.559	62	0.04157	297972
1	181625267	rs60256303	T	C	0.0046	5.007	5.541e-07	+++??-?-+++--+-+?-????+?+-+--+++++-+-+-++--++----+-++++-+-+-?-+++-?-++-?+--+	84.715	63	0.03543	298706
1	181691962	rs199980	A	G	0.0068	4.454	8.428e-06	-+++--++---+--++?--++?-++-+++----++-++++++++-++-+-+-++++---++--+-+--+++-++-+	72.257	73	0.5026	300314
1	181740201	rs199928	T	C	0.0067	4.767	1.868e-06	-+++---+------+++-+++?-++-+++----++-+---++-+-++-+-+-++-+----+--+-+--+++-++++	81.835	74	0.2492	300394
1	183189034	rs10911286	C	G	0.0119	4.428	9.514e-06	+-++-+-+-+---+-+?+-?-+--++-+++--+--+++-++-+----+++++++--+----++--+--++++++++	74.278	73	0.4363	300311
1	183208842	rs648809	T	G	0.0125	4.548	5.405e-06	+-++-+-+-+-+-+-+?+-??+--++-+++--+--++++++------+++++++-++----+++-+--+++-++++	72.224	72	0.4704	300208
1	183250163	rs10911297	A	G	0.0116	-4.687	2.775e-06	-+--+-+---+-+++-?--??-++------++-++---+--++++++-------+--++++--++-++---+----	76.322	72	0.3415	300208
1	183265801	rs12046529	T	C	0.0124	-4.64	3.477e-06	-+--+++---+-+++-?-+??-++------++-++---+--++++++-------++--+++-+++-++---+----	88.246	72	0.09371	300208
1	183266611	rs138305154	A	G	0.0125	-4.706	2.531e-06	-+--+++---+-+++-?-+??-++------++-++---+--++++++-------++--+++-+++-++---+----	87.779	72	0.09955	300208
1	183268483	rs147885904	T	C	0.0126	-4.658	3.186e-06	-+--+++---+-+++-?-+??-++------++-++---+--++++++-------++--+++-+++-++-+-+----	85.362	72	0.1344	300208
1	183286581	rs10911304	T	G	0.0137	5.214	1.853e-07	-----+-+++++---+++++++-+++-+-++-++-++-++-+-+++-+++------+-++--++++--+--+++++	73.552	75	0.5257	300486
1	183286777	rs10911305	A	G	0.0131	5.26	1.439e-07	++---+-+++++---+++++++--++-+-++-++-++-++-+0+++-+++-+----+-++-+++++--+--+++++	72.264	75	0.5681	300486
1	183287679	rs10911306	T	C	0.013	5.311	1.091e-07	++---+-+++++---+++-+++--++-+-++-++-++-++-++++++++--+------++-++-++--+--+++++	68.623	75	0.6849	300486
1	183290145	rs1411393	A	G	0.0131	5.188	2.121e-07	++---+-+++++---+++++++--++-+-++-++-++-++-+0+++-+++-+----+-++-+++++--+--+++++	73.603	75	0.524	300486
1	183293707	rs10911309	A	G	0.013	-5.243	1.582e-07	--+++-+-----+++-------++--+-+--+--+--+--+-+---+---+-++++-+--+-----++-++-----	73.689	75	0.5212	300486
1	183294430	rs4651152	C	G	0.013	-5.238	1.621e-07	--+++-+-----+++-------++--+-+--+--+--+--+-+---+---+-++++-+--+-+---++-++-----	74.016	75	0.5104	300486
1	183295930	rs4549998	A	G	0.0131	-5.24	1.61e-07	--+++-+-----+++-------++--+-+--+--+--+--+-+---+---+-++++-+--+-+---++-++-----	74.092	75	0.5079	300486
1	183296270	rs4630090	T	C	0.0129	5.248	1.537e-07	+++--+-+++++---+++++++--++-+-++-++-++-++-+0+++-+++-+----+-++-+-+++--+--+++++	73.885	75	0.5147	300486
1	183297422	rs12033696	T	C	0.0126	5.239	1.619e-07	++---+-+++++---+++++++--++-+-++-++-++-++-+++++-+++-+----+-++-+-+++--+-++++++	73.778	75	0.5183	300486
1	183297476	rs12750586	A	G	0.013	5.226	1.734e-07	++---+-+++++---+++++++--++-+-++-++-++-++-+++++-+++-+----+-++-+-+++--+--+++++	73.871	75	0.5152	300486
1	183297613	rs12122499	A	C	0.013	-5.224	1.754e-07	--+++-+-----+++-------++--+-+--+--+--+--+-----+---+-++++-+--+-+---++-++-----	73.923	75	0.5135	300486
1	183297826	rs12122568	A	C	0.013	-5.228	1.716e-07	--+++-+-----+++-------++--+-+--+--+--+--+-----+---+-++++-+--+-+---++-++-----	73.857	75	0.5156	300486
1	183297930	rs12130162	T	C	0.0137	5.191	2.086e-07	++---+-+++++---+++++++--++-+-++-++-++-++-+++++-+++------+-++--++++--+--+++++	74.586	75	0.4918	300486
1	183298008	rs12130199	T	C	0.013	5.226	1.735e-07	++---+-+++++---+++++++--++-+-++-++-++-++-+++++-+++-+----+-++-+-+++--+--+++++	73.831	75	0.5165	300486
1	183298049	rs12145095	A	G	0.013	5.225	1.742e-07	++---+-+++++---+++++++--++-+-++-++-++-++-+++++-+++-+----+-++-+-+++--+--+++++	73.801	75	0.5175	300486
1	183298219	rs10911310	C	G	0.013	5.209	1.903e-07	++---+-+++++---+++++++--++-+-++-++-++-++-+++++-+++-+----+-++-+-+++--+--+++++	73.844	75	0.5161	300486
1	183298342	rs10911311	T	C	0.013	5.209	1.899e-07	++---+-+++++---+++++++--++-+-++-++-++-++-+++++-+++-+----+-++-+-+++--+--+++++	73.792	75	0.5178	300486
1	183298463	rs10797873	C	G	0.013	5.204	1.946e-07	++---+-+++++---+++++++--++-+-++-++-++-++-+++++-+++-+----+-++-+-+++--+--+++++	73.761	75	0.5188	300486
1	183298495	rs10797874	T	C	0.0131	-5.207	1.917e-07	--+++-+-----+++-------++--+-+--+--+--+--+-0---+---+-++++-+--+-+---++-++-----	74.539	75	0.4933	300486
1	183298502	rs10797875	T	C	0.0131	-5.199	2.002e-07	--+++-+-----+++-------++--+-+--+--+--+--+-----+---+-++++-+--+-+---++-++-----	74.492	75	0.4948	300486
1	183298610	rs4651153	T	C	0.013	-5.212	1.87e-07	--+++-+-----+++-------++--+-+--+--+--+--+-----+---+-++++-+--+-+---++-++-----	73.644	75	0.5227	300486
1	183299013	rs10911312	A	G	0.0129	-5.246	1.556e-07	---++-+-----+++-------++--+-+--+--+--+--+-----+---+-++++-+--+-+---++-+------	73.888	75	0.5146	300486
1	183299153	rs10911313	A	G	0.013	5.212	1.866e-07	++---+-+++++---+++++++--++-+-++-++-++-++-+++++-+++-+----+-++-+-+++--+--+++++	73.823	75	0.5168	300486
1	183299502	rs1330224	A	G	0.013	5.202	1.976e-07	++---+-+++++---+++++++--++-+-++-++-++-++-+++++-+++-+----+-++-+-+++--+-++++++	73.947	75	0.5127	300486
1	183299611	rs953273	A	G	0.013	-5.197	2.025e-07	--+++-+-----+++-------++--+-+--+--+--+--+-0---+---+-++++-+--+-+---++-++-----	73.936	75	0.5131	300486
1	183299881	rs953274	T	C	0.013	-5.195	2.05e-07	--+++-+-----+++-------++--+-+--+--+--+--+-----+---+-++++-+--+-+---++-++-----	73.845	75	0.5161	300486
1	183300112	rs952448	T	C	0.0129	-5.197	2.022e-07	--+++-+-----+++-------++--+-+--+--+--+--+-----+-----++++-+--+-+---++-+------	74.118	75	0.5071	300486
1	183300515	rs2020986	A	G	0.013	5.196	2.035e-07	++---+-+++++---+++++++--++-+-++-++-++-++-+++++-+++-+----+-++-+-+++--+--+++++	73.876	75	0.5151	300486
1	183313912	rs10911316	T	C	0.0151	-5.025	5.025e-07	--+++-+-----+++---+---+---+----+--+-----+--------+--++++++--++-+--+--++-----	62.254	75	0.8534	300486
1	183316328	rs10911317	A	G	0.0128	5.238	1.623e-07	++---+-+++++---++++++++-++-+-++-++-++-++-+++++-+++-+----+-++-++-++--+--+++++	66.943	75	0.735	300486
1	183322317	rs779152	A	G	0.0127	-5.227	1.723e-07	--+++-+---+-+++-------++--+-+--+--+--+--+-----++----++++-+--+--+--+--++-----	67.693	75	0.713	300486
1	183323643	rs10911318	T	C	0.0134	5.276	1.32e-07	++---+-+++++---+++++++--++-+-++-++-++-++-+++++++++-+----+-++-++-++-++--+++++	69.408	75	0.6604	300486
1	183323804	rs12125953	A	G	0.0133	5.28	1.295e-07	++---+-+++++---+++++++--++-+-++-++-++-++-+++++++++-+----+-++-++-++-++--+++++	69.564	75	0.6555	300486
1	183327866	rs634375	T	C	0.0127	5.275	1.33e-07	++---+-+++-+---+++++++--++-+-++-++-++-++-+++++--++++----+-++-++-++-++--+++++	67.1	75	0.7305	300486
1	183330413	rs2811558	T	G	0.0129	5.32	1.035e-07	++---+-+++-+---+++++++--++-+-++-++-++-++-+++++--++++----+-++-++-++-++--+++++	65.979	75	0.7622	300486
1	183338207	rs673593	T	G	0.013	5.241	1.595e-07	++---+-+++-+---+++++++--++-+-++-++-+?-++-+++++--++++----+-++-+--++-++--+++++	66.474	74	0.7209	298560
1	183348252	rs3122177	T	C	0.0119	-5.203	1.965e-07	--+++-+---+--++--------+--+-+--+-++--+--+------+----++++-+--+-++--+--++-----	65.881	75	0.7649	300486
1	183362544	rs2811566	A	G	0.0138	5.262	1.422e-07	++---+-+++-+---++++++++-++-+-++-++-+++++-+++++++++++----+-++-+-+++-++--+++++	61.831	75	0.8622	300486
1	183362646	rs2788060	T	C	0.0136	5.229	1.702e-07	++---+-+++-+---++++++++-++-+-++-++-+++++-++++++-++++----+-++-+--++-++--+++++	62.42	75	0.8498	300486
1	183370057	rs6690052	A	T	0.0137	-5.25	1.519e-07	--+++-+---+-+++--------+--+-+--+--+-----+-----------++++-+--+-+---+--++-----	61.924	75	0.8603	300486
1	183375454	rs10752911	A	G	0.0098	-4.447	8.72e-06	-+-??++---+--++-?++??--+--?+--++-+----++--++--+-----+-+++--++--++-++-+-+----	73.465	69	0.3341	297400
1	183376810	rs10797880	A	T	0.0098	-4.462	8.134e-06	-+-??++---+--++-?++??--+--?+--++-+----++--++--+-----+-+++--++--++-++-+-+----	73.154	69	0.3434	297400
1	183376980	rs10494563	T	G	0.01	-4.451	8.558e-06	-+-??++---+--++-?++??--+--?+--++-+----++--++--+-----+-+++--++--++-++-+-+----	72.57	69	0.3612	297400
1	183380611	rs1361198	T	G	0.0135	-5.155	2.542e-07	---++-+-----+++--------+--+-+--+--+--+--+-----------++++-+--+-+---+--++-----	68.511	75	0.6883	300486
1	183383643	rs4652800	T	C	0.0133	-5.177	2.258e-07	---++-+-----+++--------+--+-+--+--+--+--+-----------++++-+--+-+---+--++-----	68.045	75	0.7025	300486
1	183384395	rs12745288	A	G	0.0133	5.175	2.274e-07	+++--+-+++++---++++++++-++-+-++-++-++-++-+++++++++++----+-++-+-+++-++--+++++	68.237	75	0.6967	300486
1	183386537	rs12035399	A	G	0.0144	-5.308	1.106e-07	---++-+-----+++--------+--+-+--+--+-----+-----------++++-+--+-+---+--++-----	66.788	75	0.7395	300486
1	183388259	rs12074508	T	C	0.0118	-5.171	2.327e-07	---++-+-----+++---+----+--+-+--+--+--+--+-----------++-+-+--+++---+--++-----	71.306	75	0.5995	300486
1	183394037	rs12731807	T	G	0.0128	5.319	1.044e-07	+++--+-+++++---+++-+++++++-+-++-++-++-++-+++++++++++--+-+-++-+-+++-++--+++++	64.265	75	0.8071	300486
1	183399613	rs1338373	A	G	0.0149	4.808	1.528e-06	+++--+-+++++---+++-+++++++-+-++-++-++-++-++++-++++++--+-++++-+-+++-++---++++	59.53	75	0.9044	300486
1	183401215	rs10752912	A	G	0.0148	4.74	2.138e-06	+++--+-+++++---+++-+++++++-+-++-++-++-++-++++-+-++++--+-++++-+-+++-++---++++	59.102	75	0.9111	300486
1	183401670	rs2023600	T	C	0.0127	-5.216	1.828e-07	---++-+-----+++---+-------+-+--+-++-----+----+------++-+-+--+-+---+--+++----	71.652	75	0.5882	300486
1	183402200	rs150806476	T	C	0.0106	-4.495	6.949e-06	-+-?+++-+-+-+++-?+-??--+--++--++-+----++-+++--+-----++++---++--++-++-+-+----	79.656	71	0.2253	300072
1	183402201	rs12074081	A	G	0.0146	4.869	1.123e-06	+++--+-+++++---+++-+++++++-+-++-++-+++++-++++-+-++++--+-++++-+-+++-++---++++	59.29	75	0.9082	300486
1	183403843	rs7531089	C	G	0.0129	5.295	1.189e-07	+++--+-+++-++--++++++++-++-+-++-++-++++++++++--+++++--+-+-++-+-+++--+---+-++	72.71	75	0.5534	300486
1	183419203	rs6424897	T	C	0.0086	5.285	1.257e-07	+++--+-+++-----+++++-+-+++-+-++++---++---++++---+++++-++-+++++-+-+-++--+++++	71.592	75	0.5901	300486
1	183419981	rs12024309	A	G	0.0082	5.232	1.677e-07	+++--+-+++-----+++++-+-+++-+-++++---++---++++---+++++-++-+++++-+-+-++--+++++	72.539	75	0.559	300486
1	183421406	rs4047798	T	C	0.0081	-5.208	1.905e-07	---++-+---+++++-----+-+---+-+----+++--+++----+++-----+--+-----+-+-+--++-----	72.518	75	0.5597	300486
1	183426249	rs9286848	C	G	0.0082	5.293	1.206e-07	+++--+-+++-+---+++++-+-+++-+-++++---++---++++---+++++-++-+++++-+-+-++--+++++	71.367	75	0.5975	300486
1	183430822	rs2275676	C	G	0.0085	5.272	1.347e-07	+++--+-+++++---+++++-+-+++-+-++++---++---++++---+++++-++-+++++-+-+-++--+++++	70.689	75	0.6195	300486
1	183434807	rs7518244	T	C	0.0083	-5.242	1.585e-07	---++-+-----+++-----+-+---+-+----+++--+++----+++-----+--+-----+-+-+--++-----	72.031	75	0.5757	300486
1	183436577	rs6669960	C	G	0.008	5.271	1.356e-07	+++--+-+++++---+++++-+-+++-+-++++---++---++++---+++++-++-+++++-+-+-++--+++++	72.624	75	0.5563	300486
1	183439483	rs2275675	T	C	0.0085	-5.292	1.208e-07	---++-+-----+++-----+-+---+-+----+++--+++----+++-----+--+-----+-+-+--++-----	71.38	75	0.5971	300486
1	183442097	rs10911339	T	C	0.008	5.352	8.693e-08	+++--+-+++++---+++++-+-+++-+-++++---++---++++---+++++-++-+++++-+-+-++---++++	71.741	75	0.5853	300486
1	183446922	rs12742245	A	T	0.0081	5.363	8.178e-08	+++--+-++++----+++++-+-+++-+-++++---++---++++---+++++-++-+++++-+-+-++---++++	71.224	75	0.6022	300486
1	183450622	rs2702177	C	G	0.0085	5.353	8.636e-08	+++--+-++++----+++++-+-+++-+-++++---++---++++---+++++-++-+++++-+-+-++---++++	69.602	75	0.6543	300486
1	183452545	rs2702178	A	G	0.0085	5.343	9.167e-08	+++--+-++++----+++++-+-+++-+-++++---++---++++---+++++-++-+++++-+-+-++---++++	69.628	75	0.6535	300486
1	183457198	rs2702205	A	G	0.0085	-5.343	9.157e-08	---++-+----++++-----+-+---+-+----+++--+++----+++-----+--+-----+-+-+--+++----	69.573	75	0.6552	300486
1	183457396	rs2702204	A	G	0.0081	-5.373	7.758e-08	---++-+----++++-----+-+---+-+----+++--+++----+++-----+--+-----+-+-+--+++----	69.887	75	0.6453	300486
1	183459670	rs2794619	A	G	0.0082	5.396	6.829e-08	+++--+-++++----+++++-+-+++-+-++++---++---++++---+++++-++-+++++-+-+-++---++++	69.206	75	0.6668	300486
1	183462513	rs2702203	A	T	0.0084	-5.353	8.629e-08	---++-+----++++-----+-+---+-+----+++--+++----+++-----+--+-----+-+-+--+++----	67.699	75	0.7128	300486
1	183474850	rs2761581	C	G	0.0081	5.347	8.963e-08	+++--+-+++++---+++++-+-+++-+-++++---++---++++---+++++-++-+++++-+-+-++---++++	67.928	75	0.706	300486
1	183476929	rs2782411	A	G	0.0085	5.341	9.241e-08	+++--+-++++----+++++-+-+++-+-+-++---++---++++---+++++-++-+++++-+-+-++---++++	68.762	75	0.6806	300486
1	183479090	rs10797886	T	C	0.0084	-5.336	9.517e-08	---++-+----++++-----+-+---+-+----+++--+++----+++-----+--+-----+-+-+--+++----	68.364	75	0.6928	300486
1	183489203	rs10911353	A	G	0.0081	5.377	7.555e-08	+++--+-+++++---+++++-+-+++-+--+++---++---++++---+++++-++-+++++-+-+-++---++++	68.08	75	0.7014	300486
1	183489278	rs10911354	A	G	0.0082	5.376	7.627e-08	+++--+-++++----+++++-+-+++-+--+++---++---++++---+++++-++-+++++-+-+-++---++++	68.402	75	0.6916	300486
1	183494214	rs12117885	A	G	0.0082	-5.389	7.078e-08	---++-+-----+++-----+-+---+-+0---+++--+++----+++-----+--+-+---+-+-+--+++----	66.628	75	0.744	300486
1	183516440	rs2702182	A	G	0.0087	5.381	7.402e-08	+++--+-+++-----+++++-+-+++-+-++++---+++--++++---+++++-++-+++++-+-+-++---++++	67.475	75	0.7195	300486
1	183516985	rs2702181	A	T	0.0089	5.299	1.167e-07	+++--+-+++-----+++++-+-+++-+-++++---+++--++++---+++++-++-+++++-+-+-++---++++	68.523	75	0.6879	300486
1	183516989	rs2761580	A	T	0.009	-5.308	1.108e-07	---++-+---+++++-----+-+---+-+----+++---++----+++-----+--+-----+-+-+--+++----	67.884	75	0.7073	300486
1	183517971	rs2702180	T	C	0.0092	-5.358	8.415e-08	---++-+---+++++-----+-+---+-+----+++---++----+++-----+--+-+---+-+-+--+++----	68.291	75	0.695	300486
1	183545665	rs12122217	T	C	0.0069	4.706	2.522e-06	+++--+-+++-----+++++---+++?+--+++---+++--++++---+++++-+--+-+++-+++-++---++++	69.284	74	0.6335	297920
1	183546061	rs12753665	A	G	0.0068	4.737	2.174e-06	+++--+-+++-----+++++---+++?+--+++---+++--++++---+++++-+--+-+++-+++-++---++++	70.68	74	0.5879	297920
1	200049553	rs147358900	T	C	0.0006	-4.765	1.884e-06	????????-???????????????-????????-??????????????????????????????????-???--?-	4.104	6	0.6626	207842
1	201787940	rs2678210	T	C	0.0134	5.291	1.215e-07	-+++++---+-++++---++--+++--+--++-++-++-+--+--+-+---+-+--+++++-+++++---+-++-+	81.154	75	0.2934	300486
1	201797535	rs2644109	T	C	0.0143	-4.88	1.063e-06	+---+-+++-+----++--------++-++--+--+--+-++--+-+-++--+-+++----+-----+++-+--+-	88.213	75	0.1412	300486
1	201800511	rs2678204	T	G	0.0149	4.981	6.317e-07	-+++-+---+-++++--++++-+++--+--++-++-++-+--++-+-+--++-+---++++-+++++---+-++-+	89.306	75	0.1241	300486
1	201800868	rs2820295	A	G	0.0148	-4.913	8.968e-07	+---+-+++-+----++----+---++-++--+--+--+-++--+-+-++--+-+++----+-----+++-+--+-	88.397	75	0.1382	300486
1	201802052	rs2644111	A	G	0.0141	-4.938	7.897e-07	+---+-+++-+-+--++----+---++-++--+--+--+-++--+-+-++--+-+++----+-----+++-+--+-	87.208	75	0.1584	300486
1	201806106	rs2644112	T	C	0.0154	4.939	7.836e-07	-+++-+---+-+-++--++++++++--+--++-++-++-+-+++-+-+--++-+---++++-+++++---+-++-+	86.279	75	0.1756	300486
1	201807776	rs2644119	T	C	0.0146	-4.962	6.985e-07	+---+-++--+-+--++--------++-++--+--+--+-+0--+-+-++--+-+++----+-----+++-0--+-	86.632	75	0.1689	300486
1	201808469	rs2459761	C	G	0.0146	4.946	7.587e-07	-+++-+--++-+-++--++++++++--+--++-++-++-+--++-+-+--++-+---++++-+++++---+0++-+	86.244	75	0.1763	300486
1	201809918	rs903678	A	G	0.0148	-5.018	5.229e-07	+---+-++--+-+--++--------++-++--+--+--+-++--+-+-++--+-+++----+-----+++-+--+-	87.088	75	0.1606	300486
1	201810407	rs2644122	A	G	0.0153	4.916	8.819e-07	-+++-+--++-+-++--++++++++--+--++-++-++-+-+++-+-+--++-+---++++-+++++---+0++-+	86.568	75	0.1701	300486
1	201811761	rs2820316	T	C	0.0147	-4.951	7.385e-07	+---+-++--+-+--++---+----++-++--+--+--+-++--+-+-++--+-+++----+-----+++-0--+-	87.251	75	0.1576	300486
1	201815854	rs3951628	A	G	0.0152	4.965	6.857e-07	-+++-+--++-+-++--++++++++--+--++-++-++-+--++-+-+--++-+---++++-+++++---+0++-+	86.277	75	0.1756	300486
1	201818629	rs2644107	T	C	0.0153	4.97	6.689e-07	-+++-+--++-+-++--++++++++--+--++-++-++-+--++-+-+--++-+---++++-+++++---+0++-+	86.333	75	0.1746	300486
1	201821443	rs1400875	T	C	0.0153	4.993	5.937e-07	-+++-+--++-+-++--++++++++--+--++-++-++-+--++-+-+--++-+---++++-+++++---+0++-+	86.423	75	0.1729	300486
1	201826340	rs2172935	T	C	0.015	-4.971	6.644e-07	+---+-++--+-+--++--------++-++--+--+--+-+---+-+-++--+-+++----+-----+++-0--+-	86.6	75	0.1695	300486
1	201826482	rs2132363	T	C	0.015	-5.014	5.325e-07	+---+-++--+-+--++--------++-++--+--+--+-+---+-+-++--+-+++----+-----+++-0--+-	86.262	75	0.1759	300486
1	201830247	rs2254614	T	C	0.0155	4.964	6.923e-07	-+++-+---+-+-++--++++++++--+--++-++-++-+--++-+-+--++-+---++++-+++++---+0++-+	86.111	75	0.1789	300486
1	201832864	rs2494115	C	G	0.0155	-4.973	6.601e-07	+---+-+++-+-+--++--------++-++--+--+--+-++--+-+-++--+-+++----+-----+++-0--+-	86.156	75	0.178	300486
1	201834944	rs2820309	A	G	0.0147	4.761	1.929e-06	-+++-+--++-+-++--+++-++++--+--++-++-++-+-+++-+-+--++-+---++++-+++++---++++-+	89.044	75	0.128	300486
1	201838107	rs2820310	A	G	0.0153	-4.968	6.76e-07	+---+-++--+-+--++--------++-++--+--+--+-++--+-+-++--+-+++----+-----+++-0--+-	86.169	75	0.1777	300486
1	201841476	rs2820311	A	G	0.0152	4.961	6.998e-07	-+++-+--++-++++--++++++++--+--++-++-++-+--++-+-+--++-+---++++-+++++---+0++-+	85.58	75	0.1894	300486
1	201845575	rs8024	A	C	0.0154	-5.017	5.24e-07	+---+-++--+----++--------++-++--+--+--+-++--+-+-++--+-+++----+-----+++-0--+-	86.093	75	0.1792	300486
1	201850057	rs1517810	T	C	0.0155	4.985	6.19e-07	-+++-+--++-++++--++++++++--+--++-++-++-+++++-+-+--++-+---++++-+++++---+0++-+	85.563	75	0.1897	300486
1	201851492	rs2644134	A	G	0.0152	-4.973	6.609e-07	+-----+++-+-+--+++--+-----+-++--+--+--+-++--+-+-++--+-++-----+-----+++-+--+-	83.487	75	0.235	300486
1	201856256	rs2644135	C	G	0.0177	-4.851	1.226e-06	+---+-++--+----++--------+++++--+--+--+--+--+-+-++--+-+++----+-----+++-+--+-	80.718	75	0.3052	300486
1	201860626	rs2250377	A	G	0.0158	-4.889	1.011e-06	+---+-++--+-+--++--------++-++--+--+--+-++--+-+-++--+-+++----+-----+++-0--++	87.235	75	0.1579	300486
1	201864830	rs2644114	A	G	0.0145	-4.862	1.162e-06	+--?+-++?-?-+--++---????-?+-+??-+--?--?-++????+-+?--+???+----+---?-+++-0--+-	58.818	54	0.3036	273935
1	201865763	rs8028	A	G	0.0158	-4.863	1.159e-06	+---+-++--+-+--++--------++-++--+--+--+-++--+-+-++--+-+++----+-----+++-+--+-	87.603	75	0.1514	300486
1	201869257	rs2820312	A	G	0.0161	-4.9	9.595e-07	+---+-++--+-+--++--------++-++--+--+--+-++--+-+-++--+-+++----+-----+++-+--+-	86.908	75	0.1638	300486
1	201870221	rs2820313	A	G	0.0157	4.999	5.749e-07	-+++-+--++-++++--++++++++--+--++-++-++-++-++-+-+--++-+---++++-+++++---+-++-+	84.548	75	0.2111	300486
1	201872209	rs2820314	A	C	0.0156	4.794	1.634e-06	-+++-+--++-+-++--++++++++--+--++-++-++-+--++-+-+--++-+---+++--+++++---+-++-+	86.984	75	0.1624	300486
1	201872264	rs2820315	T	C	0.0143	-4.981	6.331e-07	+-----+++-+----+++--+----++-++--+--+--+-++--+-+-++--+-+++---++-----+++-+--+-	82.977	75	0.2471	300486
1	201878537	rs2820317	C	G	0.017	-4.488	7.177e-06	+-+-+-+++-+-+--++--------+++++--+--+--+-++--+-+-++--+-+++---++-----+++-+--+-	92.647	75	0.08156	300486
1	201878620	rs2820318	T	C	0.017	4.492	7.06e-06	-+-+-+---+-+-++--++++++++-----++-++-++-+--++-+-+--++-+---+++--+++++---+-++-+	92.402	75	0.08421	300486
1	201880300	rs2820322	T	C	0.0169	4.494	6.987e-06	-+-+-+---+-+-++--++++++++-----++-++-++-+--++-+-+--++-+---+++--+++++---+-++-+	92.561	75	0.08248	300486
1	201881284	rs2644121	A	G	0.0169	4.491	7.099e-06	-+-+-+---+-+-++--++++++++-----++-++-++-+--++-+-+--++-+---+++--+++++---+-++-+	92.968	75	0.07818	300486
1	201882087	rs2819346	A	C	0.0169	4.465	8.026e-06	-+-+-+---+-+-++--++++++++-----++-++-++-+--++-+-+--++-+---+++--+++++---+-++-+	92.873	75	0.07916	300486
1	202003987	rs6694034	A	C	0.0125	-4.48	7.45e-06	----+-++-----++-+--+--+-+-?-+-++--------+-++--++-++---+--+--++++----------+-	74.199	74	0.4716	297920
1	202008917	rs9427472	T	C	0.0112	-4.493	7.033e-06	----+-++-----++-+--+--+-+-?-+-++--------+-++--++-++---+--+--+++-----------+-	76.274	74	0.4053	297920
1	202012252	rs9427716	T	C	0.0106	4.6	4.229e-06	++++-+--+++++--+-++-+-++-+?+-+--++++++++-+--++--+--+++-++-++-----+++++++++-+	78.767	74	0.3306	297920
1	204564714	rs12044599	A	G	0.0075	-4.436	9.159e-06	-+++--+-+-+----+----+++--+-----+---+--++-++-+-++-+---+-----+--+++--+--------	75.331	75	0.4675	300486
1	204564762	rs12040520	A	G	0.0072	4.431	9.399e-06	+---++-+-+-++++-++++---++-+++++-+++-++--+--+-+--+-+++-+++++-++---++-++++++++	75.299	75	0.4686	300486
1	204573481	rs55678522	A	G	0.0078	4.504	6.679e-06	+-+-++++-+-++++-++++---++-+++++-+++-++--+--+++--+-++--+++++-+++--+++-+++++++	77.091	75	0.4116	300486
1	204576522	rs11240229	T	C	0.0077	4.473	7.71e-06	+-+-++++-+-++++-++++---++-+++++-+++-++--+--+++--+-++--+++++-+++--+++++++++++	77.904	75	0.3865	300486
1	204576983	rs11584700	A	G	0.0077	-4.494	6.988e-06	-+-+----+-+----+----+++--+-----+---+--++-++---++-+--++-----+---++-----------	78.073	75	0.3814	300486
1	204586812	rs3789045	T	C	0.0076	4.446	8.739e-06	+---++++-+-++++-++++---++-+++++-+++-++--+--+++--+-++--+++-+-+++--+++++++++++	73.904	75	0.5141	300486
1	204587569	rs3747631	C	G	0.0077	4.459	8.247e-06	+---++++-+-++++-++++---++-+++++-+++-++--+--+++-++-++--+++-+-+++--+++++++++++	74.26	75	0.5024	300486
1	204603861	rs11811826	A	T	0.0084	4.479	7.495e-06	+---++++++-+-++-+++----++++-+++-+++-++--++-+-+-++-++--+++++-++---+-+++++++++	76.803	75	0.4206	300486
1	205538918	rs12032788	A	C	0.0082	4.45	8.606e-06	+---++--+-+----+------++-+++-+---+++++++-++++-++--++-++++++++++++--++++++-++	67.076	75	0.7312	300486
1	205541515	rs12035608	A	C	0.0081	4.581	4.638e-06	+---++--+-+----+---+--++-+++-+---+++++++-++++-++--++-++++++++++++--++++++-++	65.595	75	0.7726	300486
1	205544671	rs6658336	A	G	0.0081	4.52	6.182e-06	+---++--+-+----+---+--++-+++-+---+++++++-++++-+---++-++++++++++++---+++++-++	66.484	75	0.7481	300486
1	207819000	rs12744104	A	G	0.0161	4.646	3.378e-06	++++++++++-++-+++-+--+--++?+-++++-+-++++++--++--++-+-++-+-++--++---++-+-++++	68.972	74	0.6435	297920
1	207819401	rs12745818	T	C	0.0162	4.63	3.653e-06	++++++++++-++-+++-+--+--++?+-++++-+-++++++--++--++-+-++-+-++--++---++-+-++++	68.542	74	0.6573	297920
1	207821397	rs35728110	T	C	0.0171	-4.766	1.88e-06	---+------+--+---+-++-++--?-+----+-+-----0++--+++-+-+-++-+--++--++++-+-+----	69.165	74	0.6373	297920
1	207829549	rs2025371	T	C	0.0167	4.513	6.4e-06	++--++++++--+-+++-+--+--++++-++++-+-+++-+---++---+-+-+--+-++--++---++-+-++++	70.146	75	0.637	300486
1	207839505	rs17186897	C	G	0.0173	-4.688	2.754e-06	--++------+--+---+-++-++----+----+-+-----0++--+++-+-+-++-+--++---+++-+-+----	70.872	75	0.6136	300486
1	207841745	rs36001492	A	T	0.0173	-4.693	2.691e-06	--++------+--+---+-++-++----+----+-+-----0++--+++-+-+-++-+--++---+++-+-+----	70.821	75	0.6153	300486
1	207849214	rs2147021	A	G	0.0172	-4.696	2.653e-06	--++---------+---+-++-++----+----+-+-----+++--+++-+-+-++-+--++---+++-+-+----	73.367	75	0.5318	300486
1	207850879	rs34509370	T	C	0.0173	4.693	2.695e-06	++--+++++++++-+++-+--+--++++-++++-+-+++++---++---+-+-+--+-++--+++---+-+-++++	72.44	75	0.5623	300486
1	207858527	rs12738067	C	G	0.0174	4.756	1.973e-06	+++-++++++-++-+++-+--+--++++-++++-+-+++++---++---+-+-++-+-++--+++---+-+-++++	73.072	75	0.5415	300486
1	207862698	rs36019152	A	T	0.0175	4.688	2.763e-06	+++-++++++-++-+++-+--+--+++--++++-+-+++++---++---+-+-++-+-++--+++---+-+-++++	74.906	75	0.4813	300486
1	207872290	rs7527798	T	C	0.0176	-4.767	1.872e-06	---+------+--+---+-++-++---++----+-+-----+++--+++-+-+--+-+--++---++--+-+----	75.757	75	0.4538	300486
1	207872595	rs12729569	A	G	0.0174	-4.704	2.554e-06	---+------+--+---+-++-++---++----+-+-----+++--+++-+-++-+-+--++---++--+-+----	75.143	75	0.4736	300486
1	207872657	rs12748243	T	C	0.0175	4.727	2.274e-06	+++-++++++-++-+++-+--+--+++--++++-+-+++++---++---+-+--+-+-++--+++--++-+-++++	75.621	75	0.4582	300486
1	207873901	rs35823863	C	G	0.0175	-4.7	2.6e-06	---+------+--+---+-++-++---++----+-+-----+++--+++-+-+0-+-+--++---++--+-+----	75.623	75	0.4581	300486
1	207877415	rs34168498	T	G	0.017	4.677	2.907e-06	+++-++++++-++-+++-+--+--+++--++++-+-++++++--++---+-+-+--+-++--+++---+-+-++++	76.773	75	0.4215	300486
1	207880977	rs34626131	A	C	0.0143	-4.45	8.593e-06	---+---------+---+----++---++--+-+-------++---+++-+-+-++-+--++-+-+++-+-+----	65.9	75	0.7644	300486
1	207889329	rs3860294	T	C	0.014	4.632	3.627e-06	++-++++++++++++++-++++--++++-++-+-++++++++-+++-+---+++--+-++--+-+---+-+-++++	65.831	75	0.7662	300486
1	207914597	rs2796260	T	G	0.0125	4.803	1.565e-06	++--+++++-+++-+++-++++--+++--++-+---++++++-+---+-+-++---+-++--+++--++-+-++++	89.031	75	0.1282	300486
1	207936886	rs2796269	T	C	0.0137	4.604	4.154e-06	++--+++++-+++-+++-++++--++++-++-+---++++++-+-----+-++--++-++--+++--++-+-++++	90.926	75	0.1017	300486
1	207993011	rs761277	A	G	0.0105	-4.508	6.559e-06	--++-+-----------+----+-----+---+-++------+--++-+-+--+-+++--+----++----+----	77.05	75	0.4129	300486
1	207999200	rs2724373	T	C	0.0121	4.815	1.47e-06	+++-+-+++++++++++-++++--+++--++-+---++++++-+---+-+-+++-+--++--+++--++-+-++++	78.915	75	0.3562	300486
1	208000018	rs2488249	T	C	0.012	-4.703	2.56e-06	--++-+---+---+---+----++---++--+-+++------+-+++-+-+--++-++--++---++--+-+----	80.741	75	0.3045	300486
1	208035088	rs984984	T	G	0.0101	4.486	7.273e-06	++--++++++++++++++-+---++++--+-+++--+++++-+-++--+--+-+-+--++-------++++-++++	88.397	75	0.1382	300486
1	208035139	rs1319388	A	C	0.0101	4.477	7.565e-06	++--++++++++++++++-+---++++--+-+++--+++++-+-++--+--+-+-+--++-------++++-++++	88.605	75	0.1349	300486
1	208036976	rs2796247	T	C	0.01	4.484	7.311e-06	++--++++++++++++++-+---++++--+-+++--+++++-+-++--+--+-+-+--++-------++++-++++	88.353	75	0.1389	300486
1	208038596	rs2724362	T	G	0.0096	4.441	8.963e-06	++--++++++++++++++-+---++++--+-+++--+++++-+-++--+--+-+-+--++-------++++-++++	88.896	75	0.1303	300486
1	208410364	rs12030888	A	T	0.0148	-4.715	2.423e-06	???---+--++--++--?---+-++-??--+----+?-++-+----+---?+--+----+?????+-+--+0----	37.544	62	0.9941	278102
1	211029385	rs12024304	A	G	0.0085	-4.422	9.76e-06	-++++-------+-+-+-+--+++-+-++-----+--+-+------+--+---------++++--+-+-++-----	61.965	75	0.8594	300486
1	216777687	rs7544758	T	C	0.0104	-4.483	7.349e-06	-+-+--+-----++++++--++-+-+-++--+------+-+++---+-+-+--+--+--++-++++----------	74.609	75	0.491	300486
1	216824505	rs10863261	C	G	0.0114	-4.535	5.765e-06	-+-+--+----------+-++++++---++-+--------+-----+-+---+---+--++-+---++--------	88.759	75	0.1324	300486
1	216825980	rs10863262	T	C	0.0177	-5.056	4.276e-07	-+--+-++--+--++-++--+++++----+++----+--+-+----++++------+-++++-----+--+--+--	105.057	75	0.01257	300486
1	216828849	rs72737364	T	C	0.0111	4.652	3.288e-06	+-+-++-++++++++++-+------+++--+-++++++++-+-+++-+-+++-+++-++--+++++--++++++++	89.971	75	0.1145	300486
1	216828969	rs1353705	T	C	0.0111	4.645	3.399e-06	+-+-++-++++++++++-+------+++--+-++++++++-+-+++-+-+++-+++-++--+++++--++++++++	89.755	75	0.1176	300486
1	216829664	rs11117645	T	C	0.0111	-4.636	3.545e-06	-+-+--+----------+-++++++---++-+--------+-+---+-+---+---+--++-----++--------	89.461	75	0.1218	300486
1	216829853	rs7543361	T	C	0.0111	5.204	1.953e-07	--+--+--+++++--+++++-----++++-+-+++--+-++--+-+-+--+-++++-+--+---+-+-++-++-++	96.322	75	0.04925	300486
1	216829908	rs7538424	T	C	0.0111	-5.193	2.064e-07	++-++-++-----++-----+++++----+-+---++-+--++-+-+-++-+----+-++-+++-+-+--+--+--	96.751	75	0.04631	300486
1	216830128	rs11117646	A	T	0.011	-5.252	1.504e-07	++-++-++-----++-----+++++----+-+---++-+--++-+-+-++-+----+-++-+++-+-+--++-+--	96.673	75	0.04683	300486
1	216830974	rs11117647	A	C	0.0107	-4.574	4.78e-06	-+-+--+----------+-++++++---++-+--------+-+---+-+---+---+--++-----++--------	89.549	75	0.1205	300486
1	216832802	rs6664862	A	G	0.0112	4.617	3.884e-06	+-+-++-++++++++++-+------+++--+-++++++++-+-+++-+-+++-+++-++--+++++--++++++++	90.047	75	0.1134	300486
1	216832989	rs10779271	A	G	0.0115	5.035	4.78e-07	-++-++--++++++-+++++--+---+++++-+++--+-+--++-+----+-++++-+--++--++--++-+++++	93.724	75	0.07067	300486
1	216833627	rs11117648	A	T	0.0112	-4.625	3.741e-06	-+-+--+----------+-++++++---++-+--------+-+---+-+---+---+--++-+---++--------	90.962	75	0.1013	300486
1	216835187	rs58065948	A	C	0.0111	5.254	1.489e-07	--+--+--+++++--+++++-----++++-+-+++--+-++--+-+-+--+-++++-+--+---+-+-++--+-++	96.906	75	0.04528	300486
1	216836576	rs946468	A	G	0.0112	5.263	1.418e-07	--+--+--+++++--+++++-----++++-+-+++--+-++--+-+-+--+-++++-+--+---+-+-++--+-++	97.061	75	0.04427	300486
1	216836927	rs6690660	T	C	0.011	-5.245	1.559e-07	++-++-++-----++-----+++++----+-+---++-+--++-+-+-++-+----+-++-+++-+-+--++-+--	96.759	75	0.04625	300486
1	216837990	rs12060770	A	G	0.0099	5.275	1.329e-07	--+--+--+++++--+++++-----++++-+-+++--+-++--+-+-+--+-++++-+--+---+-+-++--+-++	99.383	75	0.03132	300486
1	216838398	rs11117649	A	T	0.0108	5.253	1.495e-07	--+--+--+++++--+++++-----++++-+-+++--+-++--+-+-+--+-++++-+--+---+-+-++--+-++	96.694	75	0.04669	300486
1	216838758	rs12116490	T	C	0.011	-4.767	1.868e-06	-+-+--+----------+-++++++---++-+--------+-+---+-+---+---+--++-----++--------	89.115	75	0.127	300486
1	216839426	rs7550534	A	C	0.0109	-5.23	1.692e-07	++-+++++-----++-----+++++----+-+---++-+--++-+-+-++-+----+-++-+++-+-+--++-+--	96.575	75	0.04749	300486
1	216839621	rs12094429	C	G	0.0108	-5.257	1.465e-07	++-++-++-----++-----+++++----+-+---++-+--++-+-+-++-+----+-++-+++-+-+--++-+--	96.392	75	0.04876	300486
1	216839984	rs12117613	T	C	0.0111	-4.637	3.537e-06	-+-+--+----------+-++++++---++-+--------+-+---+-+---+---+--++-----++--------	89.879	75	0.1158	300486
1	216840114	rs4532915	T	G	0.0111	4.625	3.753e-06	+-+-++-++++++++++-+------+++--+-++++++++-+-+++-+-+++-+++-++--+++++--++++++++	89.908	75	0.1154	300486
1	216840798	rs1932495	T	C	0.0113	4.636	3.55e-06	+-+-++-++++++++++-+------+++--+-++++++++-+-+++-+-+++-+++-++--+++++--++++++++	90.574	75	0.1063	300486
1	216841686	rs12403563	A	C	0.0111	-4.795	1.628e-06	-+-+--+----------+-++++++---++-+--------+-----+-+---+---+--++-----++--------	86.345	75	0.1743	300486
1	216844680	rs1498288	C	G	0.0112	4.572	4.827e-06	+-+-++-++++++++++-+------+++--+-++++++++-+-+++-+-+++-+++-++--+++++--++++++++	90.987	75	0.1009	300486
1	216846256	rs12119191	T	C	0.0111	-4.577	4.722e-06	-+-+--+----------+-++++++---++-+--------+-+---+-+---+---+--++-----++--------	90.365	75	0.1091	300486
1	216847215	rs11117654	A	C	0.0111	4.574	4.783e-06	+-+-++-++++++++++-+------+++--+-++++++++-+-+++-+-+++-+++-++--+++++--++++++++	90.637	75	0.1055	300486
1	216848771	rs12121367	T	C	0.0111	-4.658	3.195e-06	-+-+--+----------+-++++++---++++--------+-----+-+---+---+--++-----++--------	87.476	75	0.1537	300486
1	216849501	rs12125944	A	T	0.011	-4.686	2.783e-06	-+-+--+----------+-++++++---++-+--------+-----+-+---+---+--++-----++--------	87.237	75	0.1579	300486
1	216850238	rs7515047	T	G	0.011	-4.581	4.621e-06	-+-+--+----------+-++++++---++-+--------+-0---+-+---+---+--++-----++--------	91.297	75	0.09707	300486
1	216851005	rs11117657	T	C	0.0107	-4.605	4.119e-06	-+-+--+----------+-++++++---++-+--------+-----+-+---+---+--++-----++--------	90.642	75	0.1054	300486
1	216851594	rs10863265	C	G	0.0105	-4.746	2.072e-06	-+-+--+----------+-++++++---++-+--------+-----+-+---++--+--++-----++--------	87.691	75	0.1499	300486
1	216851751	rs11117659	T	C	0.0107	4.609	4.052e-06	+-+-++-++++++++++-+------+++--+-++++++++-+++++-+-+++-+++-++--+++++--++++++++	90.686	75	0.1048	300486
1	216851867	rs11117660	A	G	0.0106	-4.726	2.291e-06	-+-+--+----------+-++++++---++++--------+-----+-+---++--+--++-----++--------	86.924	75	0.1635	300486
1	216871412	rs17043393	A	G	0.0091	4.862	1.163e-06	+-+--+--+++++--+++++-----++++-+-+++--+++---+-+-+--+-++++-+--+---+-+-++-++-++	98.228	75	0.03728	300486
1	222442753	rs11487805	T	C	0.0118	4.466	7.987e-06	-+++--+-+++++++++----+--++-+-+++++++++-+-+---+-++++--+-+++++-+++++--++++++-+	71.971	75	0.5777	300486
1	222443270	rs11487806	T	C	0.0111	4.44	9.003e-06	-+++--+-+++++++++----+--++-+-+++++++++-+-+---+-++++--+-+++++-+++++--++++++-+	71.869	75	0.5811	300486
1	222446350	rs983816	A	G	0.0114	-4.43	9.421e-06	+---++-+---------++++-++--+-+---------+-+-+++-+----++-+-----+-----++------+-	70.759	75	0.6173	300486
1	222447120	rs1414664	A	G	0.0119	4.434	9.242e-06	-+++--+-+++++++++----+--++-+-+++++++++-+-+---+-++++--+-+++++-+++++--++++++-+	70.625	75	0.6216	300486
1	222447753	rs2172915	A	G	0.0115	-4.425	9.643e-06	+---++-+---------++++-++--+-+---------+-+-+++-+----++-+-----+-----++------+-	69.85	75	0.6464	300486
1	222452634	rs1414666	T	C	0.0115	4.424	9.684e-06	-+++--+-+++++++++----+--++-+-+++++++++-+-+---+-++++--+-+++++-+++++--++++++-+	71.267	75	0.6008	300486
1	222457286	rs1390333	A	G	0.0119	4.421	9.833e-06	-+++--+-+++++++++----+--++-+-+++++++++-+-+---+-++++--+-+++++-+++++--++++++-+	71.229	75	0.602	300486
1	222469633	rs4463675	A	G	0.012	4.457	8.302e-06	-+++--+-+++++++++----+--++-+-+-+++++++-+-+---+-++++--+-+++++-+++++--++++++-+	72.832	75	0.5494	300486
1	222473149	rs1927167	T	C	0.012	-4.418	9.97e-06	+---++-+---------++++-++--+-+---------+-+-+++-+----++-+-----+-----++------+-	71.775	75	0.5841	300486
1	222474346	rs11487808	T	C	0.012	-4.443	8.877e-06	+---++-+---------++++-++----+-+-------+-+-+++-+----++-+-----+-----++------+-	70.2	75	0.6353	300486
1	222476806	rs11485170	T	C	0.0107	-4.448	8.675e-06	+---++-+---------++++-++--+-+---------+-+-+++-+-----+-+-----+-----++------+-	67.899	75	0.7069	300486
1	222477735	rs17505953	T	C	0.012	-4.444	8.823e-06	+---++-+---------++++-++--+-+-+-------+-+-+++-+----++-+-----+-----++------+-	72.017	75	0.5762	300486
1	222478909	rs1927170	T	C	0.0113	4.419	9.911e-06	-+++--+-+++++++++----+--++-+-+-+++++++-+-+---+-++++--+-+++++-+++++---+++++-+	72.54	75	0.559	300486
1	222480498	rs34826864	T	C	0.0111	-4.459	8.236e-06	+---++-+---------++++-++--+-+-+-------+-+-+++-+----++-+-----+-----+++-----+-	72.545	75	0.5588	300486
1	222481688	rs34976399	T	C	0.012	4.489	7.151e-06	-+++--+-+++++++++----+--++-+-+-+++++++-+-+---+-++++--+-+++++-+++++---+++++-+	72.855	75	0.5486	300486
1	222481770	rs35942105	A	T	0.0113	4.441	8.951e-06	-+++--+-+++++++++----+--++-+-+-+++++++-+-+---+-++++--+-+++++-+++++---+++++-+	72.5	75	0.5603	300486
1	222482464	rs11485171	C	G	0.0114	4.481	7.43e-06	-+++--+-+++++++++----+--++-+-+-+++++++-+-+---+-++++--+-+++++-+++++---+++++-+	72.426	75	0.5628	300486
1	222482498	rs4509584	A	C	0.0115	-4.47	7.822e-06	+---++-+---------++++-++--+-+-+-------+-+-+++-+----++-+-----+-----++------+-	72.219	75	0.5696	300486
1	222482545	rs4264000	T	C	0.0114	-4.482	7.405e-06	+---++-+---------++++-++--+-+-+-------+-+-+++-+----++-+-----+-----++------+-	72.177	75	0.571	300486
1	222483403	rs1475415	C	G	0.0113	4.452	8.501e-06	-+++--+-+++++++++----+--++-+-+-+++++++-+-+---+-++++--+-+++++-+++++---+++++-+	72.208	75	0.5699	300486
1	222483763	rs1967823	A	G	0.012	-4.489	7.157e-06	+---++-+---------++++-++--+-+-+-------+-+-+++-+----++-+-----+-----+++-----+-	72.613	75	0.5566	300486
1	222483925	rs17506035	A	G	0.0118	4.44	8.995e-06	-+++--+-+++++++++----+--++++-+-+++++++-+-+---+-++++--+-+++++-+++++---+++++-+	72.193	75	0.5704	300486
1	222484436	rs66618621	A	G	0.0113	-4.442	8.922e-06	+---++-+---------++++-++--+-+-+-------+-+-+++-+----++-+-----+-----+++-----+-	72.175	75	0.571	300486
1	222484745	rs11485173	T	C	0.0122	4.467	7.941e-06	-+++--+-+++++++++----+--++++-+-+++++++-+-+---+-++++--+-+++++-+++++---+++++-+	71.372	75	0.5973	300486
1	222484960	rs11485174	A	G	0.0121	4.474	7.682e-06	-+++--+-+++++++++----+--++++-+-+++++++-+-+---+-++++--+-+++++-+++++---+++++-+	72.558	75	0.5584	300486
1	222487723	rs5019077	A	G	0.0113	4.433	9.292e-06	-+++--+-+++++++++----+--++-+-+-+++++++-+-+---+-++++--+-+++++-+++++---+++++-+	72.042	75	0.5754	300486
1	222487751	rs5019078	T	C	0.0113	4.437	9.117e-06	-+++--+-+++++++++----+--++-+-+-+++++++-+-+---+-++++--+-+++++-+++++---+++++-+	72.097	75	0.5736	300486
1	222489916	rs34334620	T	G	0.0118	4.461	8.141e-06	-+++--+-+++++++++----+--++++-+-+++++++-+-+---+-++++--+-+++++-+++++---+++++-+	71.226	75	0.6021	300486
1	222489937	rs36018293	A	G	0.0117	-4.461	8.15e-06	+---++-+---------++++-++----+-+-------+-+-+++-+----++-+-----+-----+++-----+-	71.02	75	0.6088	300486
1	222489944	rs34059632	C	G	0.0119	4.498	6.85e-06	-+++--+-+++++++++----+--++++-+-+++++++-+-+---+-++++--+-+++++-+++++---+++++-+	71.254	75	0.6012	300486
1	222490196	rs1034020	A	G	0.0117	-4.423	9.74e-06	+---++-+---------++++-++----+-+-------+-+-+++-+----++-+-----+-----+++-----+-	71.649	75	0.5883	300486
1	222490469	rs1034017	A	C	0.0115	-4.438	9.097e-06	+---++-+---------++++-++----+-+-------+-+-+++-+----++-+-----+-----+++-----+-	71.708	75	0.5864	300486
1	222491317	rs998402	A	C	0.0121	4.517	6.282e-06	-+++--+-+++++++++----+--++++-+-+++++++-+-+---+-++++--+-+++++-+++++---+++++-+	71.742	75	0.5852	300486
1	222491798	rs35983682	A	G	0.0115	-4.502	6.72e-06	+---++-+---------++++-++----+-+-------+-+-+++-+----++-+-----+-----+++-----+-	72.227	75	0.5693	300486
1	222491889	rs67367809	T	C	0.0116	-4.516	6.314e-06	----++-+---------++++-++----+-+-------+-+-+++-+----++-+-----+-----+++-----+-	73.084	75	0.5411	300486
1	222492736	rs10495186	T	C	0.0148	4.494	6.986e-06	++++--+-++--+++++-------++++-+++++++-+-+-+---+-+-++--+--++++-+++++--++++++-+	77.052	75	0.4128	300486
1	222492813	rs11485119	A	G	0.0148	-4.429	9.447e-06	+---++-+--++-----+++++++----+-------+-+-+-+++-+-+--++-++----+-----++------+-	76.878	75	0.4182	300486
1	222493724	rs17506363	T	C	0.0148	-4.473	7.719e-06	----++-+--++-----+++++++----+-------+-+-+-+++-+-+--++-++----+-----++------+-	77.002	75	0.4143	300486
1	222494175	rs34655557	A	G	0.0148	4.461	8.172e-06	++++--+-++-++++++-------++++-+++++++-+-+-+---+-+-++--+--++++-+++++--++++++-+	77.115	75	0.4108	300486
1	222494371	rs35094408	T	C	0.0123	-4.533	5.825e-06	+---++-+---------++++-++----+-+-------+-+-+++-+----++-+-----+-----+++-----+-	73.001	75	0.5438	300486
1	222495973	rs4481857	T	C	0.0116	-4.518	6.231e-06	+---++-+---------++++-++----+-+-------+-+-+++-+----++-+-----+-----+++-----+-	73.175	75	0.5381	300486
1	222495984	rs4481858	T	C	0.0149	-4.48	7.48e-06	----++-+--++-----+++++++----+-------+-+-+-+++-+-+--++-++----+-----++------+-	77.282	75	0.4056	300486
1	222764229	rs34123076	T	C	0.006	4.681	2.851e-06	?+???+++?+?+--?-?+??????+-?--??-+++?+-?++?????????-????????-+???-???++??++++	27.426	31	0.6506	243827
1	226775981	rs666920	T	C	0.0101	-4.422	9.774e-06	---+-+-+-+----+---+--+-+-++-+-+--+--+--+--+-----+---+-+-++--+-+--+-+-+----+-	72.906	75	0.547	300486
1	226777374	rs602660	T	C	0.0101	-4.441	8.948e-06	---+-+-+-+----+---+--+-+-++-+-+--+--+--+--+-----+---+-+-++--+-+--+-+------+-	73.072	75	0.5415	300486
1	226780046	rs581400	A	G	0.0109	-4.553	5.299e-06	---+-+-+-+----+---+--+-+-++-+-+--+--+--+--+-----+---+-+--+--+-+--+++------+-	70.753	75	0.6175	300486
1	226783339	rs7523945	T	C	0.0093	4.707	2.518e-06	+++++-+-+-++++-++-++--+-+--+-+-++-++-++-++-+++++-+++-++-+-++++-++-+-++++++-+	64.564	75	0.7995	300486
1	226787096	rs55755259	T	C	0.0096	4.499	6.812e-06	-++-+-+-+-++++-++-++--+-+--+-+-++-++-++-++-+++++-+++-+--+-++++-++-+-++++++-+	66.179	75	0.7567	300486
1	226790001	rs41314284	T	C	0.0072	-4.886	1.028e-06	-+-+?-++--+++---?--???+?--+-+-+----++-----+----++-+++--+--+-+++---+--+----++	74.617	69	0.3008	299863
1	231326697	rs151022175	A	G	0.0012	4.629	3.674e-06	?????????????????????????????????+??????+??????????-??????????????????+?++?+	4.243	6	0.6438	189365
1	231897303	rs1538977	A	G	0.0145	-4.685	2.794e-06	-+----+-+-+++?--+-+-----++-+----------+--+++-+-++----++-++-?--++?++---------	79.32	72	0.2593	297289
1	238432692	rs6657299	T	C	0.0131	4.664	3.095e-06	+++--+-+-+++--+--+--+-+-+++++---++-+++++++-+++-+++?++-+-+-++-+-+++--+-+-++-+	57.675	74	0.9192	300049
1	238432884	rs6672666	T	C	0.0131	-4.643	3.44e-06	---++-+-+---++-++-++-+-+-----+++--+-------+---+---?--+-+-+--+-+---++-+-+--+-	58.081	74	0.9131	300049
1	238432969	rs6670213	A	C	0.0131	-4.652	3.29e-06	---++-+-+---++-++-++-+-+-----+++--+-------+---+---?--+-+-+--+-+---++-+-+--+-	57.556	74	0.9209	300049
1	238433005	rs6681366	A	G	0.0131	4.687	2.77e-06	+++--+-+-+++--+--+--+-+-+++++---++-+++++++-+++-+++?++-+-+-++-+-+++--+-+-++-+	57.987	74	0.9146	300049
1	246219473	rs35757106	T	C	0.0072	4.563	5.033e-06	++---+-++++-+++-?+-?-+--+-++---+-++--++-+---+++---++++----++-++++-+++-+++-++	74.173	73	0.4397	300311
1	246222160	rs10924472	A	C	0.0072	-4.563	5.043e-06	--+++-+----+--++?-+?++++-+--+++-+--++--+-+++---+++----++++--+----+---+---+--	73.843	73	0.4504	300311
1	246222323	rs10924473	T	C	0.0128	-4.665	3.085e-06	+-+??-+-?-?+--++?-??????-?--+??----?+-?+-?????-++?--????-+--+----???-+-?-+--	43.295	45	0.5444	267076
1	246222385	rs10924475	A	G	0.0072	-4.567	4.95e-06	--+++-+----+--++--+?++++-+--+++-+--++--+-+++---+++----++++--+----+---+---+--	74.814	74	0.4517	300391
1	246222534	rs10924477	A	G	0.0072	4.56	5.122e-06	++---+-++++-++--?+-?----+-++---+-++--++-+---+++---++++----++-++++-+++-+++-++	73.729	73	0.4541	300311
1	246222572	rs10924478	T	G	0.0072	-4.555	5.242e-06	--+++-+----+--++?-+?++++-+--+++-+--++--+-+++---+++----++++--+----+---+---+--	73.71	73	0.4547	300311
1	246222934	rs6697845	A	G	0.0073	-4.54	5.637e-06	--+++-+----+--++?-+?++++-+--+++-+--+---+-++++--+++----++++--+----+---+---+--	72.515	73	0.494	300311
1	246222943	rs6693092	T	C	0.0073	4.565	4.99e-06	++---+-++++-++--?+-?----+-++---+-++-+++-+----++---++++----++-++++-+++-+++-++	72.925	73	0.4805	300311
1	246223120	rs6693295	T	C	0.0072	4.541	5.588e-06	++---+-++++-++--?+-?----+-++---+-++--++-+---+++---++++----++-++++-+++-+++-++	73.558	73	0.4597	300311
1	246224085	rs34718543	A	G	0.0075	-4.442	8.929e-06	--+-+-+----+---+--+++-++-+--+++-+--++--+-++++--++-----+-++--+----+-+-+---+--	73.794	75	0.5177	300486
1	246224438	rs12132524	T	C	0.0079	4.547	5.446e-06	++---+-++++-++--?+-?----+-++---+-++-+++-+---+++---++++----++-++++-+++-+++-++	74.883	73	0.417	300311
1	247156448	rs10802460	T	C	0.0129	-4.419	9.921e-06	+++--+----+---+----+-+---------+--+++----+--+--+-----+++++---+---+-+-----+--	72.603	75	0.5569	300486
1	247157758	rs10924887	A	G	0.0125	-4.451	8.548e-06	+++--+----+---+----+-+---------+--+++----+--+--+-----+++++---+---+-+-----+--	73.158	75	0.5387	300486
2	4822400	rs61386797	A	G	0.0094	4.422	9.765e-06	+---++++----++--++++-+--+-+++----+++----++-+++++-+++++--++-+++--++-++-+-++++	69.121	75	0.6694	300486
2	4822763	rs11674446	A	G	0.0093	-4.493	7.035e-06	-++-----++++--++----+-++-+---++++---++++--+---+-+-----++--+---++--+--+-+----	68.956	75	0.6746	300486
2	4824073	rs1470475	A	G	0.0087	-4.49	7.123e-06	-+++--+---++----+-+-+-++-+--+---+-+-+--+--+-----++++--+--++---++-++--+-+----	77.998	75	0.3837	300486
2	4824622	rs12616546	A	G	0.0095	4.462	8.125e-06	+---++-+++--++++-+-+-+--+-++-+++-+-+-++-++-+++++----++-++--+++--+--++-+-++++	75.658	75	0.457	300486
2	4824992	rs11123576	T	C	0.0094	-4.426	9.581e-06	-+++--+---++----+-+-+-++-+--+---+-+-+--+--+-----++++--+--++---++-++--+-+----	75.398	75	0.4654	300486
2	4830428	rs1374125	C	G	0.011	4.596	4.309e-06	+---++-+++-++-++-+-+-+--+-++-++--+++-+--++-+++++----++-+---+++--+--++-+-++++	80.259	75	0.3178	300486
2	4830777	rs1439817	A	G	0.011	-4.591	4.412e-06	-+++--+--++--+--+-+-+-++-+--+--++---+-++--+-----++++--+-+++---++-++--+-+----	80.33	75	0.3158	300486
2	4831598	rs4971490	A	G	0.011	4.595	4.335e-06	+---++-+++-++-++-+-+-+--+-++-++--+++-+--++-+++++----++-+---+++--+--++-+-++++	80.177	75	0.3201	300486
2	4832455	rs13400423	A	G	0.011	-4.588	4.471e-06	-+++--+---+--+--+-+-+-++-+--+--++---+-++--+-----++++--+-+++---++-++--+-+----	80.125	75	0.3215	300486
2	4833848	rs1446147	T	C	0.011	-4.569	4.903e-06	-+++--+---+--+--+-+-+-++-+--+--++---+-++--+-----++++--+-+++---++-++--+-+----	80.534	75	0.3102	300486
2	4833934	rs6756430	T	C	0.0122	4.476	7.615e-06	+---++-++--++-++-+-+-+--+-++-++--+++-+--++-+++++----++-+---+++--+--++-+-++++	79.389	75	0.3425	300486
2	4834199	rs4420705	T	C	0.0109	-4.587	4.499e-06	-+++--+---+--+--+-+-+-++-+--+--++---+-++--+-----++++--+-+++---++-++--+-+----	80.177	75	0.3201	300486
2	4835026	rs13408272	A	G	0.011	-4.583	4.579e-06	-+++--+---+--+--+-+-+-++-+--+--++---+-++--+-----++++--+-+++---++-++--+-+----	80.028	75	0.3242	300486
2	4837446	rs10198194	A	T	0.011	-4.597	4.278e-06	-+++--+---+-----+-+-+-++-+--+--++---+-++--+-----++++--+-+++---++-++--+-+----	79.774	75	0.3314	300486
2	4840230	rs984263	A	G	0.0129	4.577	4.722e-06	+---++-++--++-++-+-+-+--+-++-++--+++-+--++-+++++---+++-+---+++--+--++-+-++++	81.536	75	0.2833	300486
2	4841247	rs1898972	A	G	0.011	-4.665	3.092e-06	-+++--+---+--+--+-+-+-++-+--+--++---?-++--+-----++++--+-+++---++-++--+-+----	78.382	74	0.3417	298560
2	4844777	rs13427589	T	C	0.0122	-4.507	6.586e-06	-+++--+--++--+--+-+-+-++-+--+--++---+-++--+-----++++--+-+++---++-++--+-+----	77.662	75	0.3939	300486
2	4845377	rs6725602	T	C	0.012	4.527	5.982e-06	+---++-++--++-++-+-+-+--+-++-++--+++-+--++-+++++----++-+---+++--+--++-+-++++	78.195	75	0.3777	300486
2	4846379	rs1371472	A	T	0.0122	-4.49	7.123e-06	-+++--+--++--+--+-+-+-++-+--+--++---+-++--+-----++++--+-+++---++-++--+-+----	78.185	75	0.378	300486
2	4847385	rs6542625	A	T	0.011	4.609	4.038e-06	+---++-+++-++-++-+-+-+--+-++-++--+++-+--++-+++++----++-+---+++--+--++-+-++++	79.111	75	0.3505	300486
2	4848531	rs2315292	A	C	0.011	-4.617	3.885e-06	-+++--+---+--+--+-+-+-++-+--+--++---+-++--+-----++++--+-+++---++-++--+-+----	78.125	75	0.3798	300486
2	4850015	rs6748851	A	G	0.011	4.6	4.223e-06	+---++-+++-++-++-+-+-+--+-++-++--+++-+--++-+++++----++-+---+++--+--++-+-++++	79.072	75	0.3517	300486
2	4850247	rs12612109	T	G	0.0091	4.418	9.974e-06	+---++++++--++--++++-++-+-+++----+++----++-+++-+++++++--++++++--++-++-+-++++	72.263	75	0.5681	300486
2	4850897	rs6739702	A	C	0.0108	-4.607	4.092e-06	-+++--+---+--+--+-+-+-++-+--+--++---+-++--+-----++++--+-+++---++-++--+-+----	79.373	75	0.3429	300486
2	4851232	rs7601402	T	G	0.011	4.584	4.556e-06	+---++-++--++-++-+-+-+--+-++-++--+++-+--++-+++++----++-+---+++--+--++-+-++++	79.483	75	0.3397	300486
2	4851337	rs7594927	T	C	0.011	-4.606	4.096e-06	-+++--+---+--+--+-+-+-++-+--+--++---+-++--+-----++++--+-+++---++-++--+-+----	79.27	75	0.3459	300486
2	4875297	rs6750212	A	G	0.013	4.487	7.212e-06	+--+-+-+-+--++--++-+-++-+-+++--------+--++-+++-+++-+++--+++-++--++-++-+-++++	79.928	75	0.3271	300486
2	4875435	rs6753305	T	G	0.0098	4.606	4.102e-06	+--+-+-+++--++--++++-++-+-+++---+++--+--++-+++-+++-+++--+++-++--++-++-+-++++	74.674	75	0.4889	300486
2	4878908	rs17020077	C	G	0.0098	-4.639	3.499e-06	-++-+-+---++--++----+--+-+---+++---++-++--+---+---+---++---+--++--+--+-+----	75.515	75	0.4616	300486
2	4883135	rs1439830	T	C	0.0136	4.434	9.26e-06	+--+++--++--++++-+++-++-+-+++++++++--+--++++++++-+-+++++-+--++--+--++-+-++++	67.383	75	0.7222	300486
2	4885449	rs4476359	A	G	0.0134	4.473	7.703e-06	+--+++--++--++++-+++-++-+-+++++++++--+--++++++-+-+-+-+0+-+--++--+--++-+-++++	67.965	75	0.7049	300486
2	4911839	rs11123585	T	G	0.01	-4.496	6.934e-06	-++---+---++--++----+--+-+---+++---++-++--+---+-+-+---++--++--++-++--+-+----	77.963	75	0.3847	300486
2	4914967	rs12622723	A	T	0.01	4.536	5.744e-06	+--+++-+++-+++--++++-++-+-+++---+++--+--++-+++-+-+-+++--++-+++--+--++-+-++++	77.536	75	0.3978	300486
2	4916773	rs11123592	T	C	0.0101	4.519	6.224e-06	+--+++-+++-+++--++++-++-+-+++----++--+--++-+++-+-+-+++--++-+++--+--++-+-++++	77.242	75	0.4069	300486
2	4916939	rs10495513	A	G	0.0101	4.569	4.907e-06	+--+++-+++-+++--++++-++-+-+++---+++--+--++-+++-+-+-+++--++-+++--+--++-+-++++	77.573	75	0.3966	300486
2	4918630	rs12476913	A	C	0.0101	4.544	5.525e-06	+--+++-+++--++--++++-++-+-+++----++--+--++-+++-+-+-+++--++-+++--+--++-+-++++	77.191	75	0.4085	300486
2	4951120	rs17020193	T	G	0.0105	5.035	4.776e-07	+--+-+-+++--+++-++++-++-+-++----+--+-+-+-+-+++++---+++---+--++--++-++-++++++	80.663	75	0.3066	300486
2	4951548	rs7603132	A	G	0.0103	5.032	4.848e-07	+--+-+-+++--+++-++++-++-+-++----+--+-+-+-+-+++++---+++---+--++--++-++-++++++	81.524	75	0.2836	300486
2	4951781	rs7577823	T	C	0.0105	5.01	5.449e-07	+--+-+-+++--+++-++++-++-+-++----+--+-+-+-+-+++++---+-+---+--++--++-++-++++++	80.172	75	0.3202	300486
2	4951850	rs7577926	T	C	0.0105	4.963	6.959e-07	+--+-+-+++--+++-++++-++-+-++----+--+-+-+-+-++++++--+-+---+--++--++-++-++++++	79.503	75	0.3392	300486
2	4952314	rs11690224	T	C	0.0101	5.048	4.458e-07	+--+-+-+++--+++-++++-++-+-++----+--+-+-+-+-++++++--+++---+--++--++-++-++++++	78.519	75	0.368	300486
2	5016287	rs144487948	T	C	0.0098	4.73	2.241e-06	???++??????+??????+??+--+???-+-??-?+?+-++++?+++-+-??-+++?????????++-??+?+-++	32.908	36	0.6164	232384
2	5633019	rs188387060	T	C	0.0016	4.419	9.903e-06	??+????-?+???????+??????+????????+??++?-???????????+????+??????+????????++++	4.184	15	0.9971	227556
2	7703442	rs56272187	C	G	0.0128	4.653	3.267e-06	--++-+--++++-+-+-++--+++--++-+-+++--++-++-++++-+--+-++-+++++++++--+-+++++-++	87.462	75	0.1539	300486
2	7704185	rs13008456	T	C	0.0128	-4.578	4.7e-06	++--+-++----+-+-+--++---++--+-+---++--+--+----+-++-+--+---------++-+-----+--	87.402	75	0.155	300486
2	7704998	rs1519923	A	G	0.0121	4.599	4.248e-06	--++-+--++++-+-+-++--+++--++-+-+++--++-+++++++-+--+-++-+++++++++--+-+++++-++	86.545	75	0.1706	300486
2	7705237	rs6431886	T	C	0.0127	-4.594	4.344e-06	++--+-++----+-+-+--++---++--+-+---++--+--+----+-++-+--+---------++-+-----+--	87.128	75	0.1598	300486
2	7705812	rs34013618	T	C	0.0127	-4.614	3.957e-06	++--+-++----+-+-+--++---++--+-+---++--+--+----+-++-+--+---------++-+-----+--	87.029	75	0.1616	300486
2	7705841	rs36013085	A	T	0.0128	-4.583	4.593e-06	++--+-++----+-+-+--++-+-++--+-+---++--+--+----+-++-+--+---------++-+-----+--	87.523	75	0.1528	300486
2	7706063	rs16866377	T	C	0.0127	4.625	3.754e-06	--++-+--++++-+-+-++--+++--++-+-+++--++-++-++++-+--+-++-+++++++++--+-+++++-++	87.04	75	0.1614	300486
2	7706296	rs16866379	A	G	0.0128	4.641	3.476e-06	--++-+--++++-+-+-++--+-+--++-+-+++--++-++-++++-+--+-++-+++++++++--+-+++++-++	87.596	75	0.1516	300486
2	7706355	rs6752734	A	C	0.0119	4.643	3.434e-06	--++-+--++++-+-+-++--+++--++-+-+++--++-+++++++-+--+-++-+++++++++--+-+++++-++	85.629	75	0.1884	300486
2	7707691	rs1976199	A	G	0.0119	-4.648	3.354e-06	++--+-++----+-+-+--++---++--+-+---++--+-------+-++-+--+---------++-+-----+--	85.705	75	0.1869	300486
2	7708677	rs1028225	T	G	0.012	4.643	3.433e-06	--++-+--++++-+-+-++--+++--++-+-+++--++-+++++++-+--+-++-+++++++++--+-+++++-++	85.328	75	0.1945	300486
2	7708781	rs4560083	T	C	0.0128	4.645	3.409e-06	--++-+--++++-+-+-++--+++--++-+-+++--++-++-++++-+--+-++-+++++++++--+-+++++-++	86.675	75	0.1681	300486
2	7709715	rs1028226	A	G	0.0137	-4.66	3.163e-06	++--+-++----+-+-+--++---++--+-+---++--+-------+-++-+--+---------++-+-----+--	85.571	75	0.1896	300486
2	7709746	rs1028227	T	C	0.0143	-4.65	3.324e-06	++--+-++----+-+-+--++---++--+-+---++--+--+----+-++-+--+---------++-+-----+--	86.716	75	0.1674	300486
2	7710141	rs880236	T	C	0.0138	-4.634	3.586e-06	++--+-++----+-+-+--++---++--+-+---++--+---------++-+--+---------++-+-----+--	88.82	75	0.1315	300486
2	7710274	rs1009985	A	G	0.0145	-4.696	2.656e-06	++--+-++----+-+-+--++---++--+-+---++--+--+----+-++-+--+---------++-+-----+--	87.443	75	0.1542	300486
2	7710698	rs2172115	A	G	0.0145	-4.699	2.61e-06	++-++-++----+-+-+--++---++--+-+---++--+--+----+-++-+--+---------++-+-----+--	86.972	75	0.1626	300486
2	7710836	rs34967614	T	C	0.0144	-4.705	2.537e-06	++--+-++----+-+-+--++---++--+-+---++--+--+----+-++-+--+---------++-+-----+--	87.499	75	0.1533	300486
2	7711220	rs35106283	T	C	0.0144	-4.694	2.677e-06	++--+-++----+-+-+--++---++--+-+---++--+--+----+-++-+--+---------++-+-----+--	87.19	75	0.1587	300486
2	7713284	rs1491127	T	C	0.0141	4.689	2.751e-06	--++-+--++++-+-+-++--+++--++-+-+++--++-++-++++-+--+-++-+++++++++--+-+++++-++	87.249	75	0.1577	300486
2	7714640	rs12618607	T	C	0.0138	-4.693	2.69e-06	++--+-++----+-+-+--++---++--+-+---++--+--+----+-++-+--+---------++-+-----+--	86.952	75	0.163	300486
2	7714913	rs6710248	T	C	0.0138	4.711	2.46e-06	--++-+--++++-+-+-++--+++--++-+-+++--++-++-++++-+--+-++-+++++++++--+-+++++-++	84.681	75	0.2082	300486
2	7715663	rs6753361	C	G	0.0129	4.647	3.368e-06	-+++-+--++++-+-+-++--+-+--++++-+++-++--+0+++-+++--+-++-+++++++++--+-+++-+-+-	81.296	75	0.2896	300486
2	7716514	rs6431889	T	G	0.0129	4.72	2.36e-06	-+++-+--++++-+-+-++--+-+--++++-+++-++--+++++-+++--+-++-+++++++++--+-+++-+-+-	80.555	75	0.3096	300486
2	7717192	rs2049070	A	C	0.0133	4.728	2.267e-06	--++-+--++++-+-+-++--+++--++-+-+++--++-++-++++++--+-++-+++++++++--+-+++++-++	86.623	75	0.1691	300486
2	7718791	rs1401856	A	G	0.0133	-4.705	2.536e-06	++--+-++----+-+-+--++---++--+-+---++--+--+------++-+--+---------++-+-----+--	86.082	75	0.1794	300486
2	7720688	rs16866388	A	G	0.0133	4.735	2.195e-06	--++-+--++++-+-+-++--+++--++-+-+++--++-++-++++++--+-++-+++++++++--+-+++++-++	86.474	75	0.1719	300486
2	7721162	rs16866390	A	G	0.0133	-4.731	2.239e-06	++--+-++----+-+-+--++---++--+-+---++--+--+------++-+--+---------++-+-----+--	86.524	75	0.1709	300486
2	7723328	rs35201010	A	G	0.0133	4.765	1.886e-06	--++-+--++++-+-+-++--+++--++-+-+++--++-++-++++++--+-++-+++++++++--+-+++++-++	86.714	75	0.1674	300486
2	7723685	rs6706923	T	C	0.0132	-4.78	1.756e-06	++--+-++----+-+-+--++---++--+-+---++--+--+------++-+--+---------++-+-----+--	86.887	75	0.1642	300486
2	7724374	rs1519925	C	G	0.0134	4.718	2.381e-06	--++-+--++++-+-+-++--+++--++-+-+++--++-++-++++++--+-++-+++++++++--+-+++++-++	85.743	75	0.1861	300486
2	7724739	rs1519927	T	C	0.0129	-4.786	1.702e-06	++--+-++----+-+-+--++---++--+-+---++--+---------++-+--+---------++-+-----+--	85.328	75	0.1945	300486
2	7725135	rs6739447	A	G	0.0126	-4.763	1.904e-06	+---+-++----+-+-+--++-+-++----+---+--++-+---+---++-+--+---------++-+---+-+-+	80.647	75	0.3071	300486
2	7728010	rs908976	A	T	0.0128	4.777	1.781e-06	--++-+--++++-+-+-++--+++--++-+-+++--++-+++++++++--+-++-+++++++++--+-+++-+-++	85.936	75	0.1823	300486
2	7728766	rs908975	C	G	0.0125	4.82	1.435e-06	-+++-+--++++-+-+-++--+-+--++++-+++-++--+++++-+++--+-++-+++++++++--+-+++-+-+-	80.664	75	0.3066	300486
2	7729461	rs2883302	T	G	0.0131	-4.856	1.198e-06	++--+-++----+-+-+--++---++--+-+---++--+--+------++-+--+---------++-+-----+--	86.982	75	0.1625	300486
2	7731894	rs3845745	A	G	0.013	-4.914	8.926e-07	++--+-++----+-+-+--++---++--+-+---++--+--+------++-+--+---------++-+-----+--	87.254	75	0.1576	300486
2	7732198	rs3894574	T	C	0.013	4.841	1.29e-06	--++-+--++++-+-+-++--+++--++-+-+++--++-++-++++-+--+-++-+++++++++--+-+++++-++	85.452	75	0.192	300486
2	7732403	rs2008502	A	G	0.013	-4.836	1.324e-06	++--+-++----+-+-+--++---++--+-+---++--+--+----+-++-+--+---------++-+-----+--	85.21	75	0.197	300486
2	7732825	rs9789494	A	T	0.0129	4.807	1.534e-06	--++-+--++++-+-+-++--+++--++-+-+++--++-++-++++++--+-++-+++++++++--+-+++++-++	85.818	75	0.1846	300486
2	7732847	rs9789495	A	C	0.0128	4.789	1.673e-06	-+++-+--++++-+-+-++--+-+--++++-+++-++--+-+++-+++--+-++-+++++++++--+-+++-+-+-	79.963	75	0.3261	300486
2	7733033	rs12999282	A	G	0.013	-4.825	1.398e-06	++--+-++----+-+-+--++---++--+-+---++--+--+----+-++-+--+---------++-+-----+--	84.872	75	0.2041	300486
2	7733287	rs56202500	A	G	0.013	4.814	1.476e-06	--++-+--++++-+-+-++--+++--++-+-+++--++-++-++++++--+-++-+++++++++--+-+++++-++	85.007	75	0.2012	300486
2	7734831	rs7596755	T	C	0.0131	4.841	1.292e-06	--++-+--++++-+-+-++--+++--++-+-+++--++-+++++++++--+-++-+++++++++--+-+++0+-++	83.144	75	0.2431	300486
2	7735110	rs34294018	A	T	0.0129	4.885	1.032e-06	--++-+--++++-+-+-++--+++--++-+-+++--++-++-++++-+--+-++-+++++++++--+-+++++-++	85.093	75	0.1994	300486
2	7737753	rs35364643	A	T	0.013	4.885	1.032e-06	--++-+--++++-+-+-++--+-+--++++-+++-++--+-+++-+++--+-++-+++++++++--+-+++-+-+-	81.128	75	0.2941	300486
2	7737783	rs35627427	T	C	0.0131	4.916	8.854e-07	--++-+--++++-+-+-++--+++--++-+-+++--++-++0++++++--+-++-+++++++++--+-+++-+-++	85.275	75	0.1956	300486
2	7738378	rs7594715	T	C	0.013	-4.862	1.164e-06	++--+-++----+-+-+--++---++--+-+---++--+--+------++-+--+---------++-+---+-+--	86.236	75	0.1764	300486
2	7738514	rs7608644	A	G	0.0131	4.919	8.683e-07	--++-+--++++-+-+-++--+++--++-+-+++--++-++-++++++--+-++-+++++++++--+-+++-+-++	85.918	75	0.1826	300486
2	7739207	rs2130863	T	G	0.0131	4.92	8.639e-07	--++-+--++++-+-+-++--+++--++-+-+++--++-+--++++-+--+-++-+++++++++--+-+++-+-++	86.381	75	0.1736	300486
2	7739957	rs35821995	T	C	0.0127	4.886	1.027e-06	--++-+--++++-+-+-++--+++--++-+-+++--++-+--++++++--+-++-+++++++++--+-+++-+-++	87.464	75	0.1539	300486
2	7741423	rs62104902	T	C	0.0129	-4.985	6.202e-07	++--+-++----+-+-+--++---++--+-+---++--+--+------++-+--+---------++-+---+-+--	86.788	75	0.166	300486
2	7741817	rs7567180	A	G	0.0129	4.994	5.907e-07	--++-+--++++-+-+-++--+++--++-+-+++--++-++-++++++--+-++-+++++++++--+-+++-+-++	86.232	75	0.1765	300486
2	7742585	rs2049069	T	G	0.0129	5.008	5.511e-07	--++-+--++++-+-+-++--+++--++-+-+++--++-++-++++++--+-++-+++++++++--+-+++-+-++	86.572	75	0.17	300486
2	7742949	rs12620744	A	G	0.013	5.028	4.944e-07	--++-+--++++-+-+-++--+++--++-+-+++--++-++-++++-+--+-++-+++++++++--+-+++-+-++	88.583	75	0.1352	300486
2	7743134	rs1401858	A	G	0.0129	-4.999	5.75e-07	++--+-++----+-+-+--++---++--+-+---++--+--+------++-+--+---------++-+---+-+--	86.594	75	0.1696	300486
2	7744151	rs55773912	A	C	0.0129	-5.015	5.313e-07	++--+-++----+-+-+--++---++--+-+---++--+--+----+-++-+--+---------++-+---+-+--	86.797	75	0.1659	300486
2	7745033	rs2572138	T	C	0.0129	5.009	5.472e-07	--++-+--++++-+-+-++--+++--++-+-+++--++-++-++++++--+-++-+++++++++--+-+++-+-++	86.471	75	0.1719	300486
2	7745192	rs2172117	C	G	0.0129	-5.007	5.539e-07	++--+-++----+-+-+--++---++--+-+---++--+--+------++-+--+---------++-+---+-+--	86.462	75	0.1721	300486
2	7746242	rs2681215	T	C	0.0131	-5.012	5.397e-07	++--+-++----+-+-+--++---++--+-+---++--+--+------++-+--+---------++-+---+-+--	86.608	75	0.1694	300486
2	7746617	rs2130862	A	G	0.0131	-4.979	6.396e-07	++--+-++----+-+-+--++---++--+-+---++?-+--+------++-+--+---------++-+---+-+--	86.674	74	0.1488	298560
2	7746969	rs2172116	T	C	0.0131	-5.003	5.657e-07	++--+-++----+-+-+--++---++--+-+---++--+--+----+-++-+--+---------++-+---+-+--	86.492	75	0.1716	300486
2	7747191	rs2681214	A	G	0.0131	-5.016	5.279e-07	++--+-++----+-+-+--++---++--+-+---++--+--+------++-+--+---------++-+---+-+--	86.978	75	0.1625	300486
2	7747471	rs2946753	T	C	0.0131	5.009	5.475e-07	--++-+--++++-+-+-++--+++--++-+-+++--++-++-++++++--+-++-+++++++++--+-+++-+-++	86.615	75	0.1692	300486
2	7748030	rs2572137	A	G	0.0132	5.053	4.345e-07	--++-+--++++-+-+-++--+++--++-+-+++--++-++-++++-+--+-++-+++++++++--+-+++-+-++	86.48	75	0.1718	300486
2	7748374	rs1401855	A	G	0.0132	-5.065	4.083e-07	++--+-++----+-+-+--++---++--+-+---++--+--+------++-+--+---------++-+---+-+--	85.577	75	0.1894	300486
2	7748757	rs35991969	T	C	0.0133	-5.116	3.125e-07	++--+-++----+-+-+--++---++--+-+---++--+--+----+-++-+--+---------++-+---+-+--	87.806	75	0.148	300486
2	7749131	rs2243789	T	C	0.0133	5.078	3.819e-07	--++-+--++++-+-+-++--+++--++-+-+++--++-++-++++-+--+-++-+++++++++--+-+++-+-++	85.426	75	0.1925	300486
2	7749562	rs2243770	T	C	0.0133	-5.081	3.757e-07	++--+-++----+-+-+--++---++--+-+---++--+--+----+-++-+--+---------++-+---+-+--	85.225	75	0.1967	300486
2	7749808	rs13021705	A	T	0.0134	-5.108	3.26e-07	++--+-++----+-+-+--++---++--+-+---++--+-++----+-++-+--+---------++-+---+-+--	87.388	75	0.1552	300486
2	7750549	rs2681212	A	G	0.0133	5.077	3.839e-07	--++-+--++++-+-+-++--+++--++-+-+++--++-++-++++-+--+-++-+++++++++--+-+++-+-++	85.601	75	0.189	300486
2	7750601	rs2572157	A	G	0.0133	-5.077	3.833e-07	++--+-++----+-+-+--++---++--+-+---++--+--+----+-++-+--+---------++-+---+-+--	85.559	75	0.1898	300486
2	7750776	rs2572148	T	C	0.0133	-5.094	3.512e-07	++--+-++----+-+-+--++---++--+-+---++--+--+----+-++-+--+---------++-+---+-+--	85.575	75	0.1895	300486
2	7751128	rs34604477	T	C	0.0134	-5.095	3.482e-07	++--+-++----+-+-+--++---++--+-+---++--+--+------++-+--+---------++-+---+-+--	85.622	75	0.1886	300486
2	7751300	rs2572143	A	G	0.0134	-5.081	3.762e-07	++--+-++----+-+-+--++---++--+-+---++--+--+----+-++-+--+---------++-+---+-+--	85.483	75	0.1914	300486
2	7751342	rs2572142	A	G	0.0134	5.079	3.804e-07	--++-+--++++-+-+-++--+++--++-+-+++--++-++-++++-+--+-++-+++++++++--+-+++-+-++	85.445	75	0.1921	300486
2	7751706	rs1879198	A	T	0.0132	-5.079	3.788e-07	++--+--+----+-+-+--++---++--+-+---++--+--+----+-++-+--+---------++-+---+----	85.172	75	0.1978	300486
2	7751782	rs1879197	A	G	0.0134	-5.073	3.917e-07	++--+-++----+-+-+--++---++--+-+---++--+--+----+-++-+--+---------++-+---+-+--	85.394	75	0.1932	300486
2	7751874	rs1879196	A	T	0.0134	-5.068	4.014e-07	++--+-++----+-+-+--++---++--+-+---++--+--+----+-++-+--+---------++-+---+-+--	85.689	75	0.1872	300486
2	7751923	rs1879195	T	C	0.0134	5.012	5.395e-07	--++-+--++++-+-+-++--+++--++-+-+++--++-++-++++++--+-++-+++++++++--+-+++-+-++	87.464	75	0.1539	300486
2	7752058	rs2681211	A	G	0.0131	5.086	3.659e-07	--++-+--++++++-+-++-++-+--++++-+++-++--+-+++-+++--+-++-+++++++++--+-+-+-+-++	82.68	75	0.2543	300486
2	7752234	rs2572141	C	G	0.0134	5.063	4.124e-07	--++-+--++++-+-+-++--+++--++-+-+++--++-++-++++++--+-++-+++++++++--+-+++-+-++	85.348	75	0.1941	300486
2	7752313	rs2681210	T	C	0.0134	5.058	4.245e-07	--++-+--++++-+-+-++--+++--++-+-+++--++-++-++++++--+-++-+++++++++--+-+++-+-++	84.906	75	0.2034	300486
2	7752411	rs11673829	A	G	0.0133	5.044	4.562e-07	--++-+--++++-+-+-++--+++--++-+-+++--++-++-++++++--+-++-+++++++++--+-+++-+-++	85.042	75	0.2005	300486
2	7752472	rs11678915	A	G	0.0134	-5.065	4.087e-07	++--+-++----+-+-+--++---++--+-+---++--+--+------++-+--+---------++-+---+-+--	85.37	75	0.1937	300486
2	7752587	rs11675120	T	C	0.0134	5.066	4.07e-07	--++-+--++++-+-+-++--+++--++-+-+++--++-++-++++++--+-++-+++++++++--+-+++-+-++	85.532	75	0.1904	300486
2	7753327	rs2572156	T	G	0.0134	5.063	4.134e-07	--++-+--++++-+-+-++--+++--++-+-+++--++-++-++++++--+-++-+++++++++--+-+++-+-++	85.507	75	0.1909	300486
2	7753354	rs2572155	T	C	0.0134	-5.071	3.963e-07	++--+-++----+-+-+--++---++--+-+---++--+--+------++-+--+---------++-+---+-+--	85.365	75	0.1938	300486
2	7753456	rs2572154	T	G	0.0134	5.088	3.628e-07	--++-+--++++-+-+-++--+++--++-+-+++--++-++-++++++--+-++-+++++++++--+-+++-+-++	84.166	75	0.2195	300486
2	7753616	rs2572153	T	C	0.0134	5.058	4.241e-07	--++-+--++++-+-+-++--+++--++-+-+++--++-++-++++++--+-++-+++++++++--+-+++-+-++	85.49	75	0.1912	300486
2	7753854	rs2572152	C	G	0.0134	-5.06	4.188e-07	++--+-++----+-+-+--++---++--+-+---++--+--+------++-+--+---------++-+---+-+--	85.756	75	0.1858	300486
2	7753880	rs2572151	A	G	0.0134	5.097	3.451e-07	--++-+--++++-+-+-++--+++--++-+-+++--++-++-++++-+--+-++-+++++++++--+-+++-+-++	85.471	75	0.1916	300486
2	7753964	rs2681209	A	G	0.0135	5.057	4.258e-07	--++-+--++++-+-+-++--+++--++-+-+++--++-++-++++++--+-++-+++++++++--+-+++-+-++	85.979	75	0.1814	300486
2	7754174	rs2117568	T	C	0.0135	5.058	4.227e-07	--++-+--++++-+-+-++--+++--++-+-+++--++-++-++++++--+-++-+++++++++--+-+++-+-++	85.731	75	0.1864	300486
2	7754215	rs2117567	T	C	0.0136	5.059	4.21e-07	--++-+--++++-+-+-++--+++--++-+-+++--++-++-++++-+--+-++-+++++++++--+-+++-+-++	85.814	75	0.1847	300486
2	7754417	rs2946754	T	C	0.0136	5.063	4.131e-07	--++-+--++++-+-+-++--+++--++-+-+++--++-++-++++++--+-++-+++++++++--+-+++-+-++	85.886	75	0.1833	300486
2	7754458	rs2164247	A	G	0.0136	-5.056	4.278e-07	++--+-++----+-+-+--++---++--+-+---++--+--+------++-+--+---------++-+---+-+--	85.91	75	0.1828	300486
2	7754657	rs2572150	T	G	0.0133	5.045	4.524e-07	--++-+--++++-+-+-++--+++--++-+-+++--++-++-++++-+--+-++-+++++++++--+-+++-+-++	87.576	75	0.1519	300486
2	7754699	rs2572149	A	G	0.0135	5.064	4.114e-07	--++-+--++++-+-+-++--+++--++-+-+++--++-++-++++++--+-++-+++++++++--+-+++-+-++	85.742	75	0.1861	300486
2	7754842	rs2681208	C	G	0.0135	5.064	4.097e-07	--++-+--++++-+-+-++--+++--++-+-+++--++-++-++++++--+-++-+++++++++--+-+++-+-++	85.762	75	0.1857	300486
2	7755076	rs2572147	A	G	0.0135	-5.072	3.927e-07	++--+-++----+-+-+--++---++--+-+---++--+--+------++-+--+---------++-+---+-+--	85.365	75	0.1938	300486
2	7755388	rs2572145	T	C	0.0135	-5.077	3.831e-07	++--+-++----+-+-+--++---++--+-+---++--+--+------++-+--+---------++-+---+-+--	85.503	75	0.191	300486
2	7755632	rs1369304	A	G	0.0135	5.087	3.641e-07	--++-+--++++-+-+-++--+++--++-+-+++--++-++-++++++--+-++-+++++++++--+-+++-+-++	85.261	75	0.1959	300486
2	7755670	rs1369303	A	G	0.0135	-5.088	3.627e-07	++--+-++----+-+-+--++---++--+-+---++--+--+------++-+--+---------++-+---+-+--	85.296	75	0.1952	300486
2	7755837	rs2681207	T	C	0.0133	-5.074	3.902e-07	++--+-++----+-+-+--++---++--+-+---++--+--+------++-+--+---------++-+---+-+--	85.112	75	0.199	300486
2	7756035	rs2353899	T	C	0.0133	-5.056	4.289e-07	++--+-++----+-+-+--++---++--+-+---++--+--+------++-+--+---------++-+---+-+--	85.465	75	0.1917	300486
2	7756042	rs2353900	A	G	0.0133	5.07	3.969e-07	--++-+--++++-+-+-++--+++--++-+-+++--++-++-++++++--+-++-+++++++++--+-+++-+-++	85.176	75	0.1977	300486
2	7757047	rs1519928	T	C	0.0133	5.054	4.32e-07	--++-+--++++-+-+-++--+++--++-+-+++--++-++-++++++--+-++-+++++++++--+-+++-+-++	84.607	75	0.2098	300486
2	7758261	rs1435096	C	G	0.0132	-5.047	4.498e-07	++--+-++----+-+-++-++---++--+-+---++--+--+----+-++-+--+---------++-+---+-+--	85.76	75	0.1858	300486
2	7758980	rs270834	C	G	0.0132	5.041	4.635e-07	--++-+--++++-+-+-++--+++--++-+-+++--++-++-++++++--+-++-+++++++++--+-+++-+-++	84.518	75	0.2117	300486
2	7759149	rs270833	A	G	0.0132	5.041	4.633e-07	--++-+--++++-+-+-++--+++--++-+-+++--++-++-++++++--+-++-+++++++++--+-+++-+-++	84.281	75	0.2169	300486
2	7759930	rs1369302	T	C	0.0132	-5.061	4.16e-07	++--+-++----+-+-++-++---++--+-+---++--+--+----+-++-+--+---------++-+---+-+--	85.918	75	0.1826	300486
2	7762018	rs1435095	T	C	0.0131	5.105	3.306e-07	--++-+--++++-+-+--+--+++--++-+-+++--++-++-++++-+--+-++-+++++++++--+-+++-+-++	86.127	75	0.1785	300486
2	7762704	rs270829	A	G	0.013	-5.088	3.615e-07	++--+-++----+-+-+--++---++--+-+---++--+--+------++-+--+---------++-+---+-+--	84.449	75	0.2133	300486
2	7763314	rs270825	A	T	0.0125	-5.061	4.172e-07	++--+-++------+-+--+--++++----+---+--++-+---+---++-+--+---------++-+-+-+-+-+	82.449	75	0.26	300486
2	7763768	rs1435094	A	C	0.0131	-5.152	2.577e-07	++--+-++----+-+-++-+----++--+-+---++--+--+----+-++-+--+---------++-+---+----	86.634	75	0.1689	300486
2	7763995	rs270824	T	C	0.0127	-5.13	2.895e-07	++--+-++------+-+--+--+-++----+---+--++-+---+---++-+--+---------++-+-+-+-+--	83.87	75	0.2262	300486
2	7767116	rs13005237	A	G	0.013	-5.138	2.781e-07	++--+-++----+-+-++-+----++--+-+---++--+--+----+-++-+--+---------++-+---+----	86.77	75	0.1664	300486
2	7770662	rs772322	A	G	0.0118	4.886	1.027e-06	--++-+-+++++-+-+-+++++-+--?+-+-+++-++--+-++--+++--+-++-+++++++++--+-+-+++-++	79.188	74	0.3187	297920
2	7771210	rs13033566	A	G	0.0149	-4.842	1.284e-06	++--+-+-----+-+-+--++--+++?-+-+---+--++-++------++----+---------++-+---+---+	86.814	74	0.1464	297920
2	7772701	rs10190744	A	G	0.0117	-4.97	6.687e-07	++--+-++----+-+-++-+----++?-+-+---++--+-+0-++---++-+--+---------++-+-----+--	79.346	74	0.3143	297920
2	7775304	rs270843	A	C	0.0111	4.929	8.252e-07	--++-+--++++-+-+--+-++++--?+-+-+++--++-++++--+++--+-++-+++++++++--+-++++++++	79.447	74	0.3115	297920
2	7782295	rs270840	A	G	0.0119	4.841	1.293e-06	--++-+-+++++-+-+-+++++-+--?+-+-+++--+--+-++--+++--+-++-+++++++++--+-+++++-++	83.366	74	0.2136	297920
2	7783425	rs13405933	T	C	0.0124	-4.868	1.13e-06	++--+-++----+-+-++-+----++?-+-+---++--+-++-+----++-+--+---------++-+--------	81.821	74	0.2495	297920
2	7794936	rs11682922	T	G	0.0115	4.788	1.683e-06	--++-+--++++-+-+--+-++++--?+-+-+++--++-++++--+++--+-++-+++++++++--+-++++++++	80.547	74	0.2818	297920
2	7798673	rs6743888	T	C	0.0121	-4.788	1.688e-06	++--+-++----+-+-+-----+-++?-+-+---++-++-+--++---++-+--+---------++-+-----+--	83.233	74	0.2166	297920
2	7801780	rs12692337	A	C	0.0125	-4.743	2.107e-06	++--+-++----+-+-++-++---++?-+-+---++--+--+-++---++-+--+---------++-+--------	80.875	74	0.2733	297920
2	10952648	rs116156133	T	C	0.0098	4.469	7.864e-06	+-+??-++?+?+--+-?+???????++-+??+-+-?++?-+?????????+-????+-++-+-+-????++?++++	27.87	41	0.9414	250826
2	12190893	rs76972305	A	G	0.0069	-4.788	1.686e-06	---++--+-+--++--?+-?-----+-+++--+---------++---++--+--++-+-+-+--++----++----	46.997	73	0.9923	300311
2	19310152	rs746640808	T	C	0	-4.553	5.277e-06	?????????????????????????????????-??????????????????????????????????????-??-	1.757	2	0.4154	172739
2	22430795	rs1554266	T	C	0.0147	4.812	1.492e-06	+-++++---++++-+--++++-+++++---+-++---+-++++++++-+-----+-+++++---+---++-+++++	80.983	75	0.298	300486
2	22430946	rs1554267	A	T	0.0146	-4.754	1.998e-06	-+----+++----+-++----+-----+++-+--+++-+--------+-+++++-+-----+++-+++--+-----	81.178	75	0.2928	300486
2	22431122	rs1554269	C	G	0.0146	4.736	2.181e-06	+-++++---++++-+--++++-+++++---+-++---+-++++++++-+-----+-+++++---+---++-+++++	80.907	75	0.3	300486
[truncated: 19,857 more rows]
