# Supplementary material for: Study of 300,486 individuals identifies 148 independent genetic loci influencing general cognitive function
Source: Nat Commun. 2018 May 29;9:2098. doi: 10.1038/s41467-018-04362-x (PMC5974083; doi:10.1038/s41467-018-04362-x)
Supplement: Supplementary file 6 — Supplementary Data 3 [file 41467_2018_4362_MOESM6_ESM.xlsx]

## Sheet: Sheet1
Supplementary Data 3. Look-ups of independent significant SNPs and tagged SNPs for general cognitive function with intelligence (Hill et al., 2017), educational attainment (Okbay et al., 2016 GWAS) and cognitive function (Sniekers et al., 2017). Previously reported genome-wide significant findings are shown in red.
Chromosome	Genomic Locus	Independent significant SNP	Tagged SNP	Effect Allele	Non effect Allele	bp position tagged SNP	Z-score tagged SNP	P tagged SNP	LD between tagged SNP and independent significant SNP (r2)	Hill Effect Allele	Hill Non Effect Allele	Hill Beta	Hill SE	Hill P	Sniekers Effect Allele	Sniekers Non Effect Allele	Sniekers Beta	Sniekers SE	Sniekers P	Okbay Effect Allele	Okbay Non Effect Allele	Okbay Beta	Okbay SE	Okbay P
1	1	rs79582714	rs11588952	T	C	20771987	-5.506	3.67e-08	0.690118	T	C	-0.0261452	0.00489642	9.3117e-08	T	C	-0.0338563	0.00837821	5.323e-05	T	C	-0.012	0.004	0.0041
1	1	rs79582714	rs112322975	T	C	20775499	6.165	7.04e-10	0.846821	T	C	0.0293718	0.00516647	1.30756e-08	T	C	0.0324064	0.0100641	0.00128	T	C	0.016	0.004	0.0001292
1	1	rs79582714	rs74335351	A	G	20777021	6.144	8.03e-10	0.868709	A	G	0.029264	0.00516515	1.46459e-08	A	G	0.0320589	0.0100561	0.001432	A	G	0.016	0.004	0.0001012
1	1	rs79582714	rs371631131	C	T	20780762	NA	NA	0.835956	NA	NA	NA	NA	NA	T	C	-0.0331737	0.0100924	0.001013	NA	NA	NA	NA	NA
1	1	rs79582714	rs374619151	C	G	20780763	NA	NA	0.835956	NA	NA	NA	NA	NA	C	G	0.0331737	0.0100924	0.001013	NA	NA	NA	NA	NA
1	1	rs79582714	rs111068868	T	C	20780766	NA	NA	0.75642	NA	NA	NA	NA	NA	T	C	0.0325537	0.0103873	0.001724	NA	NA	NA	NA	NA
1	1	rs79582714	rs112662287	T	C	20786824	-6.194	5.87e-10	0.868709	T	C	-0.0299181	0.00516421	6.89927e-09	T	C	-0.032637	0.0100514	0.001168	T	C	-0.017	0.004	5.037e-05
1	1	rs79582714	rs77167727	T	C	20790806	6.127	8.97e-10	0.868709	T	C	0.0298051	0.00515974	7.62804e-09	T	C	0.0326035	0.0100504	0.001181	T	C	0.017	0.004	5.526e-05
1	1	rs79582714	rs112660177	T	G	20796219	-6.144	8.06e-10	0.868709	T	G	-0.0299782	0.00514832	5.78355e-09	T	G	-0.0337288	0.0100294	0.0007722	T	G	-0.017	0.004	5.706e-05
1	1	rs79582714	rs74335325	A	G	20800758	5.924	3.14e-09	0.845533	A	G	0.0311181	0.00543204	1.01251e-08	A	G	0.0395142	0.0105823	0.0001882	A	G	0.018	0.004	4.767e-05
1	1	rs79582714	rs75810319	T	G	20807073	6.233	4.57e-10	0.882033	T	G	0.0309444	0.0050789	1.11e-09	T	G	0.0379958	0.00993874	0.000132	T	G	0.016	0.004	5.547e-05
1	1	rs79582714	rs3767235	T	C	20811184	5.509	3.62e-08	0.702768	T	C	0.0266588	0.00493592	6.62768e-08	T	C	0.0430371	0.00967561	8.653e-06	T	C	0.014	0.004	0.0004146
1	1	rs10916805	rs56127503	T	C	20814444	-6.069	1.29e-09	1	T	C	-0.024756	0.00405406	1.01862e-09	T	C	-0.0272919	0.0079801	0.0006256	T	C	-0.011	0.003	0.000587
1	1	rs10916805	rs56100950	A	G	20816766	6.056	1.39e-09	1	A	G	0.0246619	0.00405378	1.17458e-09	A	G	0.0270754	0.00797744	0.0006897	A	G	0.011	0.003	0.0005667
1	1	rs10916805	rs12085103	T	C	20817385	6.12	9.33e-10	1	T	C	0.0246933	0.00405388	1.12017e-09	T	C	0.0270754	0.00797744	0.0006897	T	C	0.011	0.003	0.000586
1	1	rs10916805	rs10916805	C	G	20818659	6.145	8.01e-10	1	C	G	0.0248484	0.0040535	8.78257e-10	C	G	0.0274335	0.00797486	0.0005825	C	G	0.011	0.003	0.0004714
1	1	rs79582714	rs77645371	A	G	20818683	6.11	9.96e-10	0.878017	A	G	0.0327887	0.00535669	9.29393e-10	A	G	0.0444866	0.0104576	2.098e-05	A	G	0.018	0.004	2.196e-05
1	1	rs79582714	rs77855246	A	C	20819606	5.415	6.12e-08	0.688219	A	C	0.0263563	0.00491524	8.22335e-08	A	C	0.0429848	0.00962275	7.922e-06	A	C	0.014	0.004	0.000287
1	1	rs10916805	rs76480145	A	C	20821180	5.948	2.72e-09	0.937635	A	C	0.024526	0.00412472	2.74604e-09	A	C	0.0266747	0.00812014	0.001018	A	C	0.011	0.003	0.0008367
1	1	rs10916805	rs74720529	A	C	20821534	-6.101	1.05e-09	0.914883	A	C	-0.0238871	0.00398432	2.03132e-09	A	C	-0.0289235	0.0079134	0.0002573	A	C	-0.01	0.003	0.00185
1	1	rs10916805	rs12076947	A	G	20821965	-6.103	1.04e-09	0.921789	A	G	-0.0232918	0.0037882	7.82047e-10	A	G	-0.0253415	0.00656685	0.000114	A	G	-0.01	0.003	0.001417
1	1	rs10916805	rs6658554	A	G	20824366	5.981	2.22e-09	0.937635	A	G	0.0245817	0.00412822	2.60801e-09	A	G	0.0265256	0.00812423	0.001093	A	G	0.011	0.003	0.0008747
1	1	rs79582714	rs1044332	T	C	20826243	5.724	1.04e-08	0.75619	T	C	0.0270362	0.00458155	3.61059e-09	T	C	0.0363033	0.00785445	3.798e-06	T	C	0.014	0.004	0.0003418
1	1	rs79582714	rs111270978	A	C	20829303	-5.563	2.65e-08	0.75619	A	C	-0.0264104	0.00482061	4.28627e-08	A	C	-0.0382087	0.0094459	5.24e-05	A	C	-0.014	0.004	0.0002897
1	1	rs79582714	rs17412284	A	G	20830127	5.601	2.13e-08	0.75619	A	G	0.0269293	0.00458277	4.19775e-09	A	G	0.0362142	0.00785217	3.986e-06	A	G	0.014	0.004	0.0002622
1	1	rs10916805	rs80274432	T	C	20831301	-6.035	1.59e-09	0.921072	T	C	-0.0236807	0.0039926	3.00843e-09	T	C	-0.0281506	0.00791192	0.0003743	T	C	-0.01	0.003	0.001597
1	1	rs79582714	rs76674902	A	G	20831675	5.58	2.41e-08	0.75619	A	G	0.0262053	0.00481658	5.30861e-08	A	G	0.0381006	0.00944486	5.492e-05	A	G	0.014	0.004	0.0002534
1	1	rs10916805	rs12566937	T	G	20832674	-6.03	1.64e-09	0.921072	T	G	-0.0234167	0.0037942	6.75522e-10	T	G	-0.0258519	0.00657475	8.426e-05	T	G	-0.01	0.003	0.001807
1	1	rs10916805	rs6669244	T	C	20834789	-5.984	2.17e-09	0.921072	T	C	-0.023355	0.00379582	7.61155e-10	T	C	-0.0257207	0.00657481	9.149e-05	T	C	-0.01	0.003	0.001605
1	1	rs10916805	rs79759487	A	C	20835407	-6.012	1.84e-09	0.921072	A	C	-0.0237021	0.0039894	2.8283e-09	A	C	-0.0284618	0.00790387	0.000317	A	C	-0.01	0.003	0.001288
1	1	rs10916805	rs17412396	T	C	20835492	-5.996	2.03e-09	0.921072	T	C	-0.0237021	0.0039894	2.8283e-09	T	C	-0.028462	0.0079039	0.0003171	T	C	-0.01	0.003	0.001318
1	1	rs79582714	rs111700084	A	G	20837080	5.508	3.63e-08	0.75619	A	G	0.0259421	0.00481676	7.21269e-08	A	G	0.0372475	0.00941783	7.658e-05	A	G	0.014	0.004	0.0002703
1	1	rs10916805	rs12057500	C	G	20837289	-6.006	1.91e-09	0.921072	C	G	-0.0235633	0.00398871	3.47328e-09	C	G	-0.0278186	0.0078918	0.0004236	C	G	-0.01	0.003	0.001465
1	1	rs10916805	rs17403898	A	C	20837541	-5.975	2.31e-09	0.921072	A	C	-0.023546	0.00399147	3.65568e-09	A	C	-0.0277281	0.00789974	0.0004476	A	C	-0.01	0.003	0.001431
1	1	rs79582714	rs111722163	T	C	20841953	NA	NA	0.748737	T	C	0.0315175	0.00687009	4.48271e-06	T	C	0.0372217	0.00941607	7.711e-05	T	C	0.013	0.004	0.001048
1	1	rs10916805	rs12094563	T	C	20844074	-5.985	2.16e-09	0.908015	T	C	-0.0235784	0.00398501	3.28287e-09	T	C	-0.0274649	0.00789902	0.0005073	T	C	-0.01	0.003	0.001628
1	1	rs79582714	rs112684754	C	G	20846625	5.593	2.24e-08	0.767055	C	G	0.0261103	0.00480509	5.51357e-08	C	G	0.0375192	0.00942456	6.848e-05	C	G	0.014	0.004	0.0002705
1	1	rs10916805	rs77280889	A	G	20850250	-6.002	1.95e-09	0.901883	A	G	-0.0233822	0.00398081	4.2606e-09	A	G	-0.0269295	0.0078949	0.0006473	A	G	-0.01	0.003	0.001491
1	1	rs10916805	rs7544348	T	C	20851834	-5.821	5.86e-09	0.81113	T	C	-0.0231658	0.00372203	4.84776e-10	T	C	-0.0234694	0.00650483	0.0003081	T	C	-0.011	0.003	0.0008288
1	1	rs10916805	rs7552144	A	G	20851931	6.005	1.91e-09	0.901883	A	G	0.0232104	0.00387997	2.20272e-09	A	G	0.0255731	0.00715332	0.0003502	A	G	0.01	0.003	0.001487
1	1	rs10916805	rs7530736	T	C	20852207	6.008	1.88e-09	0.901883	T	C	0.0234179	0.00398115	4.04887e-09	T	C	0.0269375	0.00789493	0.000646	T	C	0.01	0.003	0.001576
1	1	rs79582714	rs77547636	A	G	20853036	5.584	2.35e-08	0.774647	A	G	0.0259519	0.00480654	6.69034e-08	A	G	0.0372286	0.00942735	7.862e-05	A	G	0.014	0.004	0.0002404
1	1	rs10916805	rs10916807	A	G	20855188	-5.803	6.51e-09	0.81113	A	G	-0.0230463	0.00381775	1.57388e-09	A	G	-0.0248671	0.00709273	0.0004546	A	G	-0.01	0.003	0.0008954
1	1	rs10916805	rs10916808	T	C	20855542	-5.804	6.46e-09	0.81113	T	C	-0.0229595	0.00391446	4.4831e-09	T	C	-0.0249237	0.00782779	0.001454	T	C	-0.01	0.003	0.001029
1	1	rs10916805	rs10916809	T	C	20855879	5.878	4.15e-09	0.831827	T	C	0.0231502	0.00372467	5.1205e-10	T	C	0.0234569	0.00650678	0.0003126	T	C	0.011	0.003	0.0005643
1	1	rs10916805	rs10916810	T	C	20856037	5.781	7.44e-09	0.81113	T	C	0.0231106	0.00372293	5.37872e-10	T	C	0.023412	0.00651056	0.0003231	T	C	0.011	0.003	0.0008569
1	1	rs10916805	rs11811983	T	C	20856845	-5.822	5.82e-09	0.81113	T	C	-0.0234126	0.00391359	2.19881e-09	T	C	-0.0246643	0.00782746	0.001627	T	C	-0.011	0.003	0.0008453
1	1	rs10916805	rs6698887	A	G	20857064	6.056	1.4e-09	0.908753	A	G	0.0232641	0.00378421	7.86292e-10	A	G	0.0251911	0.00655848	0.0001225	A	G	0.01	0.003	0.001761
1	1	rs10916805	rs6690792	A	T	20857361	6.07	1.28e-09	0.908753	A	T	0.0235629	0.00398124	3.24936e-09	A	T	0.027194	0.00789147	0.0005679	A	T	0.01	0.003	0.001758
1	1	rs10916805	rs77110732	A	G	20857643	6.117	9.52e-10	0.908753	A	G	0.0235745	0.00397867	3.11862e-09	A	G	0.0272789	0.00788635	0.0005418	A	G	0.01	0.003	0.001602
1	1	rs79582714	rs75492067	C	G	20860147	5.669	1.44e-08	0.79019	C	G	0.0267754	0.00490894	4.91366e-08	C	G	0.0350673	0.00963917	0.0002746	C	G	0.015	0.004	0.0001599
1	1	rs79582714	rs17404136	A	G	20861033	-5.633	1.77e-08	0.79019	A	G	-0.0279979	0.00477993	4.70176e-09	A	G	-0.0375017	0.00871322	1.679e-05	A	G	-0.015	0.004	0.0001461
1	1	rs10916805	rs12070795	A	G	20863796	5.916	3.3e-09	0.790598	A	G	0.0211712	0.00386409	4.278e-08	A	G	0.0239854	0.00764841	0.001714	A	G	0.009	0.003	0.003458
1	1	rs79582714	rs112214119	G	A	20864743	NA	NA	0.822798	A	G	-0.032138	0.00782815	4.0354e-05	A	G	-0.0349895	0.0107297	0.001111	A	G	-0.016	0.005	0.0004299
1	1	rs79582714	rs113923880	G	A	20864746	NA	NA	0.822798	A	G	-0.0320441	0.00783141	4.28133e-05	A	G	-0.0347787	0.0107342	0.001196	A	G	-0.016	0.005	0.0004537
1	1	rs12073420	rs12073420	T	G	20871181	6.3	2.98e-10	1	T	G	0.0255432	0.00406637	3.35166e-10	T	G	0.0277852	0.00742126	0.0001808	T	G	0.011	0.003	0.0007542
1	1	rs79582714	rs111235962	T	C	20871750	6.119	9.43e-10	0.977457	T	C	0.0311607	0.00522101	2.39708e-09	T	C	0.032382	0.0101734	0.00146	T	C	0.018	0.004	1.129e-05
1	1	rs12073420	rs112456461	A	C	20873804	5.969	2.39e-09	0.901829	A	C	0.0246112	0.00409216	1.80734e-09	A	C	0.0228846	0.00803814	0.004417	A	C	0.012	0.003	0.0004739
1	1	rs12073420	rs12074493	G	A	20875189	NA	NA	0.915029	NA	NA	NA	NA	NA	NA	NA	NA	NA	NA	A	G	-0.007	0.004	0.08919
1	1	rs12073420	rs4610976	T	C	20875420	-6.027	1.67e-09	0.915029	T	C	-0.0245256	0.00409748	2.1567e-09	T	C	-0.0224185	0.00804974	0.005345	T	C	-0.012	0.003	0.0004494
1	1	rs79582714	rs4615814	T	C	20875459	-6.132	8.67e-10	0.977457	T	C	-0.0311263	0.00521969	2.4726e-09	T	C	-0.0320457	0.0101732	0.001631	T	C	-0.018	0.004	1.003e-05
1	1	rs79582714	rs74701752	T	G	20875676	6.095	1.1e-09	0.977457	T	G	0.0309725	0.005219	2.94635e-09	T	G	0.0320455	0.0101732	0.001634	T	G	0.018	0.004	1.095e-05
1	1	rs12073420	rs12075943	A	G	20876208	-6.05	1.45e-09	0.808717	A	G	-0.0242082	0.00390673	5.77157e-10	A	G	-0.0241723	0.00779248	0.001925	A	G	-0.012	0.003	0.0002657
1	1	rs12073420	rs12069779	A	G	20877026	-5.991	2.09e-09	0.765161	A	G	-0.023742	0.00388426	9.81608e-10	A	G	-0.0253013	0.00781385	0.001204	A	G	-0.011	0.003	0.0005075
1	1	rs12073420	rs12072199	T	C	20877812	-6.018	1.77e-09	0.760276	T	C	-0.0234374	0.00369281	2.19887e-10	T	C	-0.0233721	0.00646352	0.0002997	T	C	-0.011	0.003	0.0005465
1	1	rs12073420	rs10916812	A	C	20878201	-6.201	5.61e-10	0.760276	A	C	-0.0235285	0.00388311	1.36801e-09	A	C	-0.0238341	0.00776861	0.002152	A	C	-0.011	0.003	0.0003477
1	1	rs12073420	rs6675648	A	G	20878692	-5.979	2.24e-09	0.760276	A	G	-0.0235271	0.00388342	1.3752e-09	A	G	-0.0238086	0.00776789	0.002178	A	G	-0.011	0.003	0.0004078
1	1	rs12073420	rs111802442	A	G	20879156	-5.999	1.98e-09	0.760276	A	G	-0.0234962	0.00388319	1.44165e-09	A	G	-0.0238034	0.00778143	0.00222	A	G	-0.011	0.003	0.0003345
1	1	rs12073420	rs74058407	A	G	20880905	-5.977	2.27e-09	0.760276	A	G	-0.0234611	0.00388281	1.51915e-09	A	G	-0.0240856	0.00776205	0.001918	A	G	-0.011	0.003	0.0005156
1	1	rs12073420	rs3795509	A	T	20881309	5.98	2.23e-09	0.760276	A	T	0.0232444	0.00388273	2.14254e-09	A	T	0.0234371	0.00777091	0.002563	A	T	0.011	0.003	0.0004898
1	1	rs12073420	rs10799637	T	C	20881754	-6.128	8.87e-10	0.779996	T	C	-0.0236277	0.00388648	1.20591e-09	T	C	-0.0236546	0.0077709	0.002331	T	C	-0.011	0.003	0.0003336
1	1	rs79582714	rs6689263	A	G	20882523	-6.162	7.19e-10	0.75958	A	G	-0.0282039	0.00448337	3.15851e-10	A	G	-0.0319581	0.00790454	5.277e-05	A	G	-0.016	0.004	1.744e-05
1	1	rs79582714	rs6676960	T	C	20882712	6.047	1.47e-09	0.730896	T	C	0.0277541	0.00470654	3.70347e-09	T	C	0.0324555	0.00948158	0.0006183	T	C	0.016	0.004	2.615e-05
1	1	rs12073420	rs6691916	A	G	20882766	-6.02	1.75e-09	0.762532	A	G	-0.0234274	0.00388916	1.70421e-09	A	G	-0.0238266	0.00776869	0.002162	A	G	-0.011	0.003	0.0003639
1	1	rs79582714	rs6702976	A	G	20882794	6.057	1.38e-09	0.730896	A	G	0.0281617	0.00472159	2.45471e-09	A	G	0.0335593	0.0095015	0.0004126	A	G	0.016	0.004	2.696e-05
1	1	rs79582714	rs60860959	T	C	20882864	6.019	1.76e-09	0.730896	T	C	0.0289169	0.00476064	1.24635e-09	T	C	0.0351991	0.00973696	0.0003001	T	C	0.016	0.004	3.459e-05
1	1	rs79582714	rs76440167	A	G	20883582	6.3	2.98e-10	1	A	G	0.0311829	0.00518005	1.74627e-09	A	G	0.0296233	0.0100931	0.003332	A	G	0.018	0.004	1.888e-05
1	1	rs79582714	rs79582714	T	C	20883608	6.32	2.61e-10	1	T	C	0.0306324	0.00516633	3.04331e-09	T	C	0.0297645	0.0100828	0.003158	T	C	0.017	0.004	2.349e-05
1	1	rs79582714	rs76992245	G	C	20914745	NA	NA	0.825143	C	G	-0.0404567	0.00759409	9.96336e-08	C	G	-0.0381475	0.0104086	0.0002477	C	G	-0.019	0.004	5.634e-06
1	1	rs79582714	rs74056307	A	G	20956760	5.958	2.55e-09	0.71508	A	G	0.0315129	0.00524083	1.82163e-09	A	G	0.0320739	0.0102211	0.001702	A	G	0.021	0.004	2.714e-06
1	1	rs79582714	rs17414302	A	G	20976535	6.243	4.3e-10	0.68108	A	G	0.0327006	0.00531211	7.46751e-10	A	G	0.0341188	0.0102582	0.00088	A	G	0.022	0.004	8.178e-07
1	2	rs541507329	rs149515236	A	C	21458254	NA	NA	1	NA	NA	NA	NA	NA	NA	NA	NA	NA	NA	NA	NA	NA	NA	NA
1	2	rs541507329	rs567942080	C	T	21486844	NA	NA	1	NA	NA	NA	NA	NA	NA	NA	NA	NA	NA	NA	NA	NA	NA	NA
1	2	rs541507329	rs183937814	G	C	21492033	NA	NA	1	NA	NA	NA	NA	NA	NA	NA	NA	NA	NA	NA	NA	NA	NA	NA
1	2	rs541507329	rs571934003	T	C	22014125	NA	NA	1	NA	NA	NA	NA	NA	NA	NA	NA	NA	NA	NA	NA	NA	NA	NA
1	2	rs541507329	rs150768594	A	G	22227282	NA	NA	1	NA	NA	NA	NA	NA	NA	NA	NA	NA	NA	NA	NA	NA	NA	NA
1	2	rs541507329	rs112059540	A	C	22288304	NA	NA	1	NA	NA	NA	NA	NA	NA	NA	NA	NA	NA	NA	NA	NA	NA	NA
1	2	rs541507329	rs148478596	A	G	22288724	NA	NA	1	NA	NA	NA	NA	NA	NA	NA	NA	NA	NA	NA	NA	NA	NA	NA
1	2	rs541507329	rs532451110	A	G	22335505	NA	NA	1	NA	NA	NA	NA	NA	NA	NA	NA	NA	NA	NA	NA	NA	NA	NA
1	2	rs541507329	rs555052093	C	T	22364924	NA	NA	1	NA	NA	NA	NA	NA	NA	NA	NA	NA	NA	NA	NA	NA	NA	NA
1	2	rs541507329	rs541507329	A	G	22428398	5.452	4.98e-08	1	NA	NA	NA	NA	NA	A	G	0.0991294	0.0772638	0.1995	NA	NA	NA	NA	NA
1	2	rs541507329	rs534434838	A	G	22503006	NA	NA	1	NA	NA	NA	NA	NA	NA	NA	NA	NA	NA	NA	NA	NA	NA	NA
1	2	rs541507329	rs141887726	T	C	22595645	NA	NA	1	NA	NA	NA	NA	NA	NA	NA	NA	NA	NA	NA	NA	NA	NA	NA
1	2	rs541507329	rs535958570	C	G	22764105	NA	NA	1	NA	NA	NA	NA	NA	NA	NA	NA	NA	NA	NA	NA	NA	NA	NA
1	2	rs541507329	rs555101454	T	C	23297870	NA	NA	1	NA	NA	NA	NA	NA	NA	NA	NA	NA	NA	NA	NA	NA	NA	NA
1	3	rs7518151	rs10914446	A	C	32054094	-5.955	2.61e-09	0.978803	A	C	-0.0164962	0.00325547	4.03674e-07	A	C	-0.010428	0.00608399	0.08651	A	C	-0.01	0.003	0.0004871
1	3	rs7518151	rs10914447	A	G	32056510	-6.032	1.62e-09	0.983968	A	G	-0.017757	0.00333193	9.85619e-08	A	G	-0.0137837	0.00664596	0.03808	A	G	-0.01	0.003	0.0003462
1	3	rs7518151	rs4949447	A	G	32057186	-5.892	3.82e-09	0.948476	A	G	-0.0154145	0.00321315	1.60808e-06	A	G	-0.0100934	0.00602229	0.09382	A	G	-0.009	0.003	0.0008587
1	3	rs7518151	rs12065856	A	T	32059764	6.074	1.25e-09	0.983968	A	T	0.0177603	0.00332622	9.32116e-08	A	T	0.013839	0.00664057	0.03718	A	T	0.01	0.003	0.0004337
1	3	rs7518151	rs12071060	G	T	32061031	NA	NA	0.648789	NA	NA	NA	NA	NA	T	G	0.00966296	0.0061626	0.1168	NA	NA	NA	NA	NA
1	3	rs7518151	rs373355271	G	T	32061035	NA	NA	0.653917	NA	NA	NA	NA	NA	T	G	0.0104983	0.00617181	0.08893	NA	NA	NA	NA	NA
1	3	rs7518151	rs146584509	G	T	32061039	NA	NA	0.644383	T	G	0.0122087	0.00449526	0.00660942	T	G	0.0100809	0.0061619	0.1018	T	G	0.008	0.003	0.002827
1	3	rs7518151	rs60500843	G	T	32061043	NA	NA	0.689613	T	G	0.0130299	0.0045321	0.00403987	T	G	0.0116792	0.00621234	0.06004	T	G	0.008	0.003	0.002301
1	3	rs7518151	rs201999313	G	T	32061051	NA	NA	0.714085	NA	NA	NA	NA	NA	T	G	0.0129455	0.00639284	0.04283	NA	NA	NA	NA	NA
1	3	rs7518151	rs7518151	T	C	32061851	-6.105	1.03e-09	1	T	C	-0.016968	0.00317639	9.19609e-08	T	C	-0.0102961	0.00557449	0.06481	T	C	-0.011	0.003	4.952e-05
1	3	rs10914457	rs4949448	T	G	32062066	5.172	2.31e-07	0.726727	T	G	0.0176603	0.00293348	1.74127e-09	T	G	0.0179681	0.00509879	0.0004256	T	G	0.009	0.003	0.0004177
1	3	rs10798879	rs6682016	A	G	32064903	7.221	5.17e-13	0.938494	A	G	0.0216919	0.00316686	7.40298e-12	A	G	0.0263353	0.00629731	2.884e-05	A	G	0.009	0.003	0.0003845
1	3	rs10914462	rs11581611	A	G	32065385	6.135	8.52e-10	0.848489	A	G	0.0192234	0.00307696	4.16998e-10	A	G	0.0171974	0.00610918	0.004877	A	G	0.007	0.002	0.002655
1	3	rs10914462	rs11579820	A	C	32065460	-6.204	5.5e-10	0.848489	A	C	-0.0199236	0.00307656	9.42395e-11	A	C	-0.0174405	0.00610876	0.004303	A	C	-0.008	0.002	0.002379
1	3	rs10798879	rs12032260	T	A	32068570	NA	NA	0.756668	A	T	0.0175772	0.00451508	9.90096e-05	A	T	0.0222723	0.00618847	0.0003195	A	T	0.01	0.004	0.009977
1	3	rs10798879	rs190639719	T	A	32068572	NA	NA	0.756668	A	T	0.0189732	0.00451508	2.64341e-05	A	T	0.0222723	0.00618847	0.0003195	A	T	0.009	0.003	0.001459
1	3	rs10798879	rs7523616	T	C	32068677	-7.382	1.55e-13	0.943262	T	C	-0.0221067	0.00316435	2.82523e-12	T	C	-0.0277731	0.00629205	1.015e-05	T	C	-0.01	0.003	7.406e-05
1	3	rs10914462	rs10914448	A	G	32068843	6.353	2.11e-10	0.843864	A	G	0.0201202	0.00307804	6.2898e-11	A	G	0.0178073	0.00611303	0.003578	A	G	0.008	0.002	0.001849
1	3	rs10914462	rs6681414	A	G	32070234	6.321	2.59e-10	0.852438	A	G	0.0200109	0.00303456	4.27131e-11	A	G	0.0175224	0.00577155	0.002397	A	G	0.008	0.002	0.00177
1	3	rs10914462	rs4949218	A	G	32070519	6.337	2.35e-10	0.852438	A	G	0.0201012	0.00307792	6.54301e-11	A	G	0.0175122	0.00611245	0.004168	A	G	0.008	0.002	0.001863
1	3	rs10798879	rs4949219	A	G	32070766	-7.345	2.05e-13	0.947915	A	G	-0.0225733	0.00316435	9.77567e-13	A	G	-0.0275861	0.006291	1.161e-05	A	G	-0.011	0.003	3.494e-05
1	3	rs10798879	rs6664789	C	G	32072406	-7.391	1.46e-13	0.947915	C	G	-0.0222542	0.00316407	2.01533e-12	C	G	-0.0276561	0.00629119	1.105e-05	C	G	-0.01	0.003	6.837e-05
1	3	rs10798879	rs6680160	A	G	32072737	-7.359	1.86e-13	0.947915	A	G	-0.0221759	0.00316394	2.40126e-12	A	G	-0.0276672	0.00629086	1.091e-05	A	G	-0.01	0.003	5.396e-05
1	3	rs10914462	rs7525618	T	C	32073766	6.334	2.39e-10	0.852438	T	C	0.0201665	0.00307797	5.68189e-11	T	C	0.0176724	0.00611292	0.003836	T	C	0.008	0.002	0.001833
1	3	rs10914462	rs10914451	A	G	32073908	6.317	2.67e-10	0.852438	A	G	0.0195675	0.00307798	2.05397e-10	A	G	0.0177586	0.00611312	0.003678	A	G	0.007	0.002	0.002837
1	3	rs10914462	rs10798876	C	G	32074514	-6.321	2.6e-10	0.852438	C	G	-0.0201952	0.003078	5.33909e-11	C	G	-0.0176847	0.00611292	0.003811	C	G	-0.008	0.002	0.001741
1	3	rs10914462	rs10914452	A	G	32074575	6.329	2.46e-10	0.852438	A	G	0.0195934	0.00307798	1.94413e-10	A	G	0.0176847	0.00611292	0.003811	A	G	0.007	0.002	0.002589
1	3	rs10798879	rs10798877	A	G	32074747	7.359	1.85e-13	0.952658	A	G	0.0222128	0.00316425	2.22003e-12	A	G	0.0276996	0.00629106	1.069e-05	A	G	0.01	0.003	7.172e-05
1	3	rs10798879	rs10914453	A	G	32075036	-7.407	1.29e-13	0.957325	A	G	-0.022113	0.0030859	7.73131e-13	A	G	-0.0261962	0.00570226	4.353e-06	A	G	-0.01	0.003	5.841e-05
1	3	rs10914462	rs2152110	C	G	32076144	-6.344	2.24e-10	0.856403	C	G	-0.020195	0.00307796	5.33909e-11	C	G	-0.0173789	0.00611288	0.004473	C	G	-0.008	0.002	0.001852
1	3	rs10798879	rs1464306	T	C	32076261	-7.385	1.53e-13	0.957325	T	C	-0.0222462	0.00316407	2.05224e-12	T	C	-0.0275753	0.00629142	1.172e-05	T	C	-0.01	0.003	7.754e-05
1	3	rs10914462	rs10914454	A	G	32078940	6.375	1.83e-10	0.850463	A	G	0.0203094	0.00307719	4.11201e-11	A	G	0.0181109	0.00611029	0.003035	A	G	0.008	0.002	0.002269
1	3	rs10914462	rs3753614	A	G	32081785	6.001	1.96e-09	0.751842	A	G	0.0191037	0.00306288	4.45511e-10	A	G	0.0165182	0.0059568	0.00556	A	G	0.007	0.002	0.008096
1	3	rs10914462	rs3753613	T	C	32082000	-6.558	5.45e-11	0.850463	T	C	-0.0200838	0.00299955	2.14786e-11	T	C	-0.0180979	0.00553623	0.001079	T	C	-0.007	0.002	0.004045
1	3	rs10914462	rs3753612	C	G	32082410	-6.575	4.88e-11	0.854492	C	G	-0.0201067	0.00299954	2.03812e-11	C	G	-0.0182309	0.00553627	0.00099	C	G	-0.007	0.002	0.003838
1	3	rs10798879	rs3753611	T	C	32082486	7.597	3.04e-14	0.953058	T	C	0.0224752	0.00315348	1.02502e-12	T	C	0.0281301	0.00627625	7.389e-06	T	C	0.01	0.003	0.0001496
1	3	rs10914462	rs11589306	C	G	32082822	-6.593	4.32e-11	0.861014	C	G	-0.0202544	0.00307617	4.57064e-11	C	G	-0.0184429	0.00610895	0.002533	C	G	-0.007	0.002	0.002916
1	3	rs10798879	rs11807225	C	G	32083193	7.662	1.83e-14	0.962178	C	G	0.0220618	0.00315516	2.70434e-12	C	G	0.0280564	0.00627659	7.808e-06	C	G	0.009	0.003	0.0002202
1	3	rs10914462	rs12740754	G	C	32083273	NA	NA	0.861014	C	G	0.018307	0.00445675	3.99613e-05	C	G	0.0182041	0.00610876	0.002883	C	G	0.007	0.002	0.003086
1	3	rs10914462	rs1056526	T	C	32084904	6.609	3.87e-11	0.865066	T	C	0.0202633	0.00305484	3.28495e-11	T	C	0.0182781	0.00593445	0.002071	T	C	0.007	0.002	0.004104
1	3	rs10798879	rs11575883	A	G	32085485	7.196	6.21e-13	0.894024	A	G	0.0210678	0.00313721	1.87482e-11	A	G	0.0270565	0.00624573	1.476e-05	A	G	0.009	0.003	0.0003506
1	3	rs10914462	rs968335	A	G	32085776	6.663	2.68e-11	0.861014	A	G	0.0205298	0.00300015	7.75898e-12	A	G	0.0194893	0.00553673	0.0004319	A	G	0.007	0.002	0.003219
1	3	rs10798879	rs10753257	A	G	32086089	7.203	5.9e-13	0.889386	A	G	0.0210657	0.00311578	1.37084e-11	A	G	0.0265502	0.00606722	1.208e-05	A	G	0.009	0.003	0.0002011
1	3	rs10798879	rs2280386	A	C	32086912	-7.617	2.61e-14	0.962178	A	C	-0.0227846	0.00311043	2.38511e-13	A	C	-0.0282092	0.00592756	1.942e-06	A	C	-0.01	0.003	5.984e-05
1	3	rs10798879	rs10914456	T	C	32088171	-7.28	3.34e-13	0.914906	T	C	-0.0213095	0.00299074	1.03957e-12	T	C	-0.0246692	0.00520556	2.147e-06	T	C	-0.009	0.003	0.0003209
1	3	rs10798879	rs4949449	T	G	32088534	-7.33	2.31e-13	0.905415	T	G	-0.0213015	0.00314514	1.26273e-11	T	G	-0.0260656	0.00626276	3.153e-05	T	G	-0.009	0.003	0.0003168
1	3	rs10798879	rs4949450	A	T	32088675	7.722	1.15e-14	0.98573	A	T	0.0231496	0.00316381	2.53561e-13	A	T	0.0282282	0.00629532	7.342e-06	A	T	0.01	0.003	9.055e-05
1	3	rs10798879	rs4949451	A	G	32088913	NA	NA	0.910576	NA	NA	NA	NA	NA	A	G	-0.0261777	0.00626112	2.908e-05	NA	NA	NA	NA	NA
1	3	rs10914462	rs3134718	T	C	32089839	6.672	2.53e-11	0.865066	T	C	0.0211093	0.00307643	6.80799e-12	T	C	0.0191087	0.00610893	0.001759	T	C	0.008	0.002	0.0024
1	3	rs10798879	rs6663012	T	G	32091779	-7.376	1.63e-13	0.919256	T	G	-0.0214169	0.00302251	1.38251e-12	T	G	-0.0249771	0.00538997	3.589e-06	T	G	-0.009	0.003	0.0002625
1	3	rs10798879	rs2271933	A	G	32092525	-7.249	4.19e-13	0.902526	A	G	-0.0215341	0.0029849	5.42004e-13	A	G	-0.0252819	0.00519668	1.142e-06	A	G	-0.01	0.003	0.000141
1	3	rs10914462	rs2176807	T	G	32092735	-6.708	1.98e-11	0.86498	T	G	-0.0211893	0.00292574	4.40913e-13	T	G	-0.0197495	0.00507962	0.0001012	T	G	-0.008	0.002	0.001486
1	3	rs10798879	rs871634	C	G	32093167	7.712	1.24e-14	0.976246	C	G	0.0229983	0.0030848	8.96069e-14	C	G	0.0268235	0.00570713	2.604e-06	C	G	0.01	0.003	0.0001033
1	3	rs10914462	rs6703093	T	C	32093561	6.679	2.4e-11	0.854492	T	C	0.0211578	0.00292521	4.7271e-13	T	C	0.0201003	0.00507839	7.571e-05	T	C	0.008	0.002	0.001917
1	3	rs10914457	rs10914457	A	C	32094261	5.659	1.53e-08	1	A	C	0.0182024	0.00304554	2.27647e-09	A	C	0.0199098	0.0055895	0.0003687	A	C	0.008	0.003	0.002807
1	3	rs10914462	rs1061770	A	G	32096265	-6.736	1.63e-11	0.889568	A	G	-0.0212875	0.00307967	4.76961e-12	A	G	-0.0184177	0.00611681	0.002605	A	G	-0.008	0.002	0.002413
1	3	rs10798879	rs10914458	T	C	32096746	-7.375	1.64e-13	0.929556	T	C	-0.0213944	0.00306863	3.12535e-12	T	C	-0.025429	0.00567993	7.56e-06	T	C	-0.009	0.003	0.0002076
1	3	rs10798879	rs10798879	T	C	32096815	-7.797	6.36e-15	1	T	C	-0.0232069	0.00316543	2.27836e-13	T	C	-0.0283817	0.00630004	6.627e-06	T	C	-0.01	0.003	7.553e-05
1	3	rs10914462	rs10914459	T	C	32096918	-6.75	1.48e-11	0.893625	T	C	-0.0213343	0.00307967	4.28458e-12	T	C	-0.018588	0.0061165	0.002372	T	C	-0.008	0.002	0.002316
1	3	rs10798879	rs10798880	T	G	32097088	7.678	1.61e-14	0.976572	T	G	0.0227176	0.00300106	3.73559e-14	T	G	0.0266202	0.00522272	3.449e-07	T	G	0.01	0.003	4.935e-05
1	3	rs10914462	rs4949454	A	G	32099041	6.742	1.56e-11	0.885564	A	G	0.021439	0.00292793	2.43866e-13	A	G	0.0198678	0.00508387	9.31e-05	A	G	0.008	0.002	0.001827
1	3	rs10798879	rs10798881	C	G	32101775	7.792	6.61e-15	0.995251	C	G	0.0231385	0.00316301	2.56769e-13	C	G	0.0283112	0.00629697	6.911e-06	C	G	0.01	0.003	7.849e-05
1	3	rs10914462	rs7529064	A	C	32105192	6.647	2.99e-11	0.870279	A	C	0.0206616	0.00295536	2.72488e-12	A	C	0.0185132	0.00525346	0.0004257	A	C	0.008	0.002	0.001561
1	3	rs10798879	rs6425777	C	G	32105447	7.301	2.85e-13	0.929556	C	G	0.0211929	0.00314635	1.63131e-11	C	G	0.0260028	0.00625971	3.269e-05	C	G	0.009	0.003	0.0003069
1	3	rs10798879	rs7546297	A	G	32106494	-7.794	6.51e-15	1	A	G	-0.022994	0.00300956	2.16704e-14	A	G	-0.0259358	0.00523745	7.341e-07	A	G	-0.01	0.003	8.534e-05
1	3	rs10798879	rs6699558	T	C	32107622	-7.365	1.77e-13	0.929556	T	C	-0.0213536	0.00314694	1.15679e-11	T	C	-0.0263609	0.00626596	2.591e-05	T	C	-0.009	0.003	0.000251
1	3	rs10798879	rs10798882	C	G	32108547	-7.445	9.7e-14	0.948673	C	G	-0.0225247	0.00300524	6.62146e-14	C	G	-0.0266338	0.00522231	3.391e-07	C	G	-0.01	0.003	0.0001492
1	3	rs10798879	rs7524405	A	C	32108579	7.496	6.58e-14	0.948673	A	C	0.0225702	0.0030051	5.88459e-14	A	C	0.0267861	0.0052235	2.927e-07	A	C	0.01	0.003	0.000119
1	3	rs10914462	rs7549590	A	G	32109849	6.797	1.07e-11	0.905014	A	G	0.0213937	0.00292964	2.82497e-13	A	G	0.0207108	0.0050874	4.678e-05	A	G	0.008	0.002	0.001078
1	3	rs10914462	rs7542583	A	G	32110813	-6.7	2.09e-11	0.900827	A	G	-0.0213394	0.00293186	3.37703e-13	A	G	-0.0207478	0.00508899	4.557e-05	A	G	-0.008	0.002	0.001266
1	3	rs10914462	rs10914460	T	C	32113216	NA	NA	0.889544	T	C	-0.019173	0.00445672	1.69231e-05	T	C	-0.020024	0.00610861	0.001044	T	C	-0.007	0.002	0.00408
1	3	rs10914462	rs10914461	A	G	32113217	6.364	1.96e-10	0.885615	A	G	0.0200254	0.00307929	7.85953e-11	A	G	0.0200558	0.00610899	0.001028	A	G	0.007	0.002	0.003754
1	3	rs10798879	rs4949455	A	G	32114793	7.534	4.93e-14	0.934863	A	G	0.0222813	0.00300408	1.19791e-13	A	G	0.0257271	0.00522166	8.332e-07	A	G	0.01	0.003	0.0001828
1	3	rs10914462	rs2139539	T	C	32117779	6.715	1.88e-11	0.900827	T	C	0.0211651	0.00293109	5.16452e-13	T	C	0.0208459	0.00509058	4.227e-05	T	C	0.008	0.002	0.001474
1	3	rs10798879	rs1061392	C	A	32118160	NA	NA	0.84511	A	C	0.0212685	0.00454687	2.90242e-06	A	C	0.0269708	0.00623171	1.504e-05	A	C	0.009	0.003	0.0008524
1	3	rs10914462	rs3817398	T	C	32119431	-6.692	2.2e-11	0.905014	T	C	-0.0210872	0.00293321	6.52092e-13	T	C	-0.0206257	0.00509024	5.081e-05	T	C	-0.008	0.002	0.001616
1	3	rs10798879	rs7545321	A	G	32122164	-7.511	5.86e-14	0.893989	A	G	-0.0220009	0.00308221	9.46763e-13	A	G	-0.0258688	0.00568546	5.359e-06	A	G	-0.009	0.003	0.0007842
1	3	rs10914462	rs56074668	T	C	32123801	-6.303	2.93e-10	0.890278	T	C	-0.0208523	0.00307681	1.22504e-11	T	C	-0.0197804	0.00610694	0.001201	T	C	-0.008	0.002	0.0008969
1	3	rs10914462	rs10914462	A	G	32125943	6.573	4.94e-11	1	A	G	0.0218261	0.00302276	5.17605e-13	A	G	0.02218	0.00556866	6.817e-05	A	G	0.008	0.002	0.001168
1	3	rs10914462	rs2271927	T	C	32127911	-6.974	3.08e-12	0.926221	T	C	-0.0220632	0.00303624	3.6858e-13	T	C	-0.0243241	0.00559175	1.36e-05	T	C	-0.009	0.003	0.0004998
1	3	rs10914462	rs2271928	A	G	32127953	-6.964	3.32e-12	0.926221	A	G	-0.0217221	0.0029605	2.17955e-13	A	G	-0.0228027	0.00512536	8.616e-06	A	G	-0.009	0.003	0.0006144
1	3	rs10914462	rs1568396	G	C	32128283	NA	NA	0.803343	C	G	0.0169864	0.00445203	0.000135949	C	G	0.0202714	0.00610216	0.0008922	C	G	0.008	0.003	0.002145
1	3	rs10914462	rs12032291	A	G	32129041	6.943	3.84e-12	0.921415	A	G	0.0218188	0.00303426	6.43977e-13	A	G	0.0237642	0.00559025	2.131e-05	A	G	0.009	0.003	0.0004205
1	3	rs10914462	rs1356803	C	G	32131163	-6.128	8.92e-10	0.875968	C	G	-0.0204079	0.00299896	1.01041e-11	C	G	-0.0196308	0.00553292	0.0003887	C	G	-0.008	0.002	0.001301
1	3	rs10798879	rs10914463	T	C	32132063	6.268	3.66e-10	0.758784	T	C	0.0199215	0.00311283	1.55588e-10	T	C	0.0238252	0.00617554	0.0001143	T	C	0.009	0.003	0.000554
1	3	rs10798879	rs2292988	T	C	32133737	-7.573	3.66e-14	0.853605	T	C	-0.0233502	0.00305173	1.9869e-14	T	C	-0.0268174	0.00527072	3.615e-07	T	C	-0.01	0.003	0.0001272
1	3	rs10798879	rs7512805	T	C	32134763	6.92	4.52e-12	0.825453	T	C	0.0202094	0.00303031	2.57384e-11	T	C	0.0232476	0.00560589	3.375e-05	T	C	0.008	0.003	0.000986
1	3	rs10798879	rs6425778	A	T	32135022	7.211	5.54e-13	0.805253	A	T	0.021336	0.0030554	2.8886e-12	A	T	0.0238173	0.00565196	2.508e-05	A	T	0.009	0.003	0.0003706
1	3	rs10798879	rs7537646	A	G	32135495	6.039	1.55e-09	0.714719	A	G	0.0195035	0.00294449	3.50247e-11	A	G	0.0209256	0.00512003	4.371e-05	A	G	0.008	0.003	0.001118
1	3	rs10798879	rs2292989	A	G	32135773	7.596	3.06e-14	0.840684	A	G	0.0234297	0.00304639	1.46015e-14	A	G	0.0261519	0.00527576	7.142e-07	A	G	0.01	0.003	0.0001847
1	3	rs10798879	rs1474182	A	G	32136398	6.179	6.45e-10	0.732473	A	G	0.0210243	0.00294486	9.38004e-13	A	G	0.0213472	0.00511802	3.032e-05	A	G	0.008	0.002	0.0006808
1	3	rs10798879	rs1474181	C	G	32136610	-6.111	9.88e-10	0.680234	C	G	-0.0208475	0.00301822	4.94298e-12	C	G	-0.0215055	0.00557427	0.0001142	C	G	-0.008	0.002	0.0008746
1	3	rs10798879	rs909002	T	C	32139635	6.151	7.72e-10	0.682771	T	C	0.0205235	0.00294232	3.05273e-12	T	C	0.0203002	0.00511082	7.113e-05	T	C	0.008	0.002	0.001015
1	3	rs10798879	rs4949456	A	G	32140039	-7.335	2.22e-13	0.795916	A	G	-0.0225988	0.00311177	3.80375e-13	A	G	-0.0268939	0.00572455	2.624e-06	A	G	-0.009	0.003	0.0004647
1	3	rs10798879	rs4949457	T	C	32140053	-7.745	9.54e-15	0.820072	T	C	-0.0231574	0.00304871	3.05902e-14	T	C	-0.0264573	0.00527458	5.288e-07	T	C	-0.009	0.003	0.0002518
1	3	rs10798879	rs10798883	T	C	32140305	6.173	6.71e-10	0.682771	T	C	0.0207147	0.00301722	6.62701e-12	T	C	0.0208563	0.00557208	0.0001821	T	C	0.008	0.002	0.0009509
1	3	rs10798879	rs2292993	T	C	32140733	6.144	8.07e-10	0.686047	T	C	0.0209286	0.00301768	4.05339e-12	T	C	0.0214524	0.00557206	0.000118	T	C	0.008	0.002	0.001104
1	3	rs4949460	rs4949458	T	G	32142332	-5.126	2.95e-07	0.847977	T	G	-0.0183039	0.00300028	1.05583e-09	T	G	-0.0208903	0.00552799	0.0001573	T	G	-0.008	0.002	0.001051
1	3	rs4949460	rs4949459	T	G	32142354	5.141	2.73e-07	0.865816	T	G	0.0180402	0.00292197	6.6587e-10	T	G	0.0194032	0.00506875	0.0001292	T	G	0.008	0.002	0.0007069
1	3	rs4949460	rs4949460	A	G	32143138	5.803	6.53e-09	1	A	G	0.0179108	0.00301063	2.69472e-09	A	G	0.0218932	0.00555665	8.154e-05	A	G	0.009	0.003	0.0002109
1	4	rs12025777	rs35080169	A	G	41454959	-4.756	1.98e-06	0.629953	A	G	-0.0259928	0.00483632	7.67965e-08	A	G	-0.0298157	0.00952579	0.00175	A	G	-0.006	0.004	0.09739
1	4	rs12025777	rs12743340	A	G	41456032	4.709	2.49e-06	0.629953	A	G	0.0255634	0.00467902	4.67064e-08	A	G	0.0277354	0.00861347	0.001281	A	G	0.006	0.004	0.09635
1	4	rs12025777	rs34502739	A	G	41459146	4.753	2e-06	0.629953	A	G	0.0270762	0.00483057	2.08057e-08	A	G	0.0314085	0.00951484	0.0009625	A	G	0.007	0.004	0.09095
1	4	rs12025777	rs67450703	A	G	41460129	4.748	2.05e-06	0.629953	A	G	0.0268784	0.0048302	2.62676e-08	A	G	0.0311988	0.00951474	0.00104	A	G	0.007	0.004	0.08635
1	4	rs12025777	rs13376450	A	G	41469043	4.702	2.57e-06	0.629953	A	G	0.0269347	0.00481694	2.24909e-08	A	G	0.0312867	0.00951251	0.001005	A	G	0.007	0.004	0.07627
1	4	rs12025777	rs67460888	T	C	41469337	4.796	1.62e-06	0.629953	T	C	0.0271711	0.00483224	1.8779e-08	T	C	0.0313608	0.00951193	0.000977	T	C	0.007	0.004	0.08277
1	4	rs12025777	rs12023079	A	G	41470111	-4.799	1.6e-06	0.629953	A	G	-0.0265002	0.00471257	1.87352e-08	A	G	-0.0281261	0.008625	0.001112	A	G	-0.007	0.004	0.08466
1	4	rs12025777	rs36084778	A	G	41479538	4.821	1.43e-06	0.642406	A	G	0.0272862	0.00483094	1.62128e-08	A	G	0.031677	0.00951547	0.0008725	A	G	0.007	0.004	0.06763
1	4	rs12025777	rs11209363	T	C	41485077	4.746	2.08e-06	0.642406	T	C	0.0248044	0.00459083	6.552e-08	T	C	0.0236656	0.0079149	0.002792	T	C	0.006	0.004	0.09619
1	4	rs12025777	rs12031277	A	G	41491801	4.456	8.34e-06	0.605305	A	G	0.0229762	0.00471652	1.10793e-06	A	G	0.0205797	0.0081375	0.01144	A	G	0.006	0.004	0.1389
1	4	rs12025777	rs16911	T	C	41498021	-4.786	1.7e-06	0.642406	T	C	-0.0253263	0.00459153	3.4707e-08	T	C	-0.0234771	0.00790742	0.002984	T	C	-0.007	0.004	0.06791
1	4	rs12025777	rs2281509	C	T	41500009	NA	NA	0.635548	T	C	0.0225373	0.00693897	0.00116248	T	C	0.0315856	0.00951088	0.0008967	T	C	0.007	0.004	0.07167
1	4	rs12025777	rs2300658	A	G	41505022	-4.774	1.81e-06	0.635548	A	G	-0.0252582	0.00459134	3.77074e-08	A	G	-0.0233384	0.00790863	0.003165	A	G	-0.007	0.004	0.07735
1	4	rs12025777	rs2300655	A	G	41508141	-4.722	2.34e-06	0.628804	A	G	-0.02725	0.00481878	1.55881e-08	A	G	-0.0316785	0.00950737	0.0008624	A	G	-0.007	0.004	0.06236
1	4	rs12025777	rs10489521	T	C	41508490	-4.786	1.7e-06	0.635548	T	C	-0.02691	0.00470914	1.10083e-08	T	C	-0.0290414	0.00861762	0.0007507	T	C	-0.007	0.004	0.0528
1	4	rs12025777	rs12729448	A	G	41509834	-4.793	1.64e-06	0.635548	A	G	-0.0257349	0.00463931	2.90369e-08	A	G	-0.0248353	0.00818028	0.0024	A	G	-0.007	0.004	0.05522
1	4	rs12025777	rs2268678	A	G	41511053	-4.788	1.68e-06	0.635548	A	G	-0.0253667	0.0045917	3.30515e-08	A	G	-0.0236316	0.00790619	0.002795	A	G	-0.007	0.004	0.05734
1	4	rs12025777	rs10489520	A	C	41511755	-4.788	1.68e-06	0.635548	A	C	-0.0252771	0.00459047	3.6621e-08	A	C	-0.0235477	0.00790721	0.002897	A	C	-0.007	0.004	0.0568
1	4	rs12025777	rs12406620	A	T	41512664	4.77	1.84e-06	0.635548	A	T	0.0252623	0.00459065	3.73421e-08	A	T	0.0237813	0.00790601	0.002633	A	T	0.007	0.004	0.05631
1	4	rs12025777	rs35444705	T	G	41515320	4.78	1.75e-06	0.635548	T	G	0.0276649	0.0048278	1.00236e-08	T	G	0.0313472	0.00951646	0.0009885	T	G	0.008	0.004	0.03948
1	4	rs12025777	rs35201793	A	G	41521922	-4.218	2.47e-05	0.700527	A	G	-0.0268326	0.00509206	1.36797e-07	A	G	-0.0326473	0.0100299	0.001134	A	G	-0.008	0.004	0.06712
1	4	rs12025777	rs12729586	A	C	41522377	-4.751	2.03e-06	0.635548	A	C	-0.0269128	0.00470824	1.08986e-08	A	C	-0.0295221	0.0086196	0.0006158	A	C	-0.007	0.004	0.06426
1	4	rs12025777	rs34486565	T	C	41522510	-4.753	2.01e-06	0.635548	T	C	-0.0272918	0.00482761	1.57421e-08	T	C	-0.0318079	0.00951478	0.0008301	T	C	-0.007	0.004	0.06838
1	4	rs12025777	rs12742379	A	G	41526381	4.751	2.03e-06	0.635548	A	G	0.0269559	0.00470806	1.03139e-08	A	G	0.0297857	0.00863104	0.0005578	A	G	0.007	0.004	0.07483
1	4	rs12025777	rs12722762	T	C	41526426	-4.743	2.1e-06	0.635548	T	C	-0.0271951	0.0048278	1.77084e-08	T	C	-0.0314783	0.00951293	0.0009361	T	C	-0.007	0.004	0.0663
1	4	rs12025777	rs12044302	C	G	41528389	-4.739	2.15e-06	0.635548	C	G	-0.0272927	0.00481914	1.48401e-08	C	G	-0.03185	0.00951883	0.0008197	C	G	-0.007	0.004	0.06005
1	4	rs12025777	rs12045171	A	G	41528805	-4.721	2.35e-06	0.635548	A	G	-0.0251205	0.00454715	3.30515e-08	A	G	-0.0239244	0.00789846	0.002452	A	G	-0.007	0.004	0.06239
1	4	rs12025777	rs12046059	A	T	41533012	4.756	1.98e-06	0.635548	A	T	0.0273776	0.00482909	1.43374e-08	A	T	0.0316446	0.00950859	0.0008735	A	T	0.007	0.004	0.06891
1	4	rs12025777	rs16827876	T	G	41539536	4.716	2.41e-06	0.635548	T	G	0.025261	0.00458469	3.59134e-08	T	G	0.0242656	0.00788611	0.00209	T	G	0.007	0.004	0.07051
1	4	rs12025777	rs12023623	A	G	41540636	-4.757	1.96e-06	0.634563	A	G	-0.0271655	0.00482761	1.83255e-08	A	G	-0.03142	0.00950681	0.0009489	A	G	-0.007	0.004	0.06757
1	4	rs12025777	rs34979067	A	G	41543084	-4.748	2.06e-06	0.635548	A	G	-0.0271859	0.00482761	1.78826e-08	A	G	-0.0315123	0.00950885	0.0009191	A	G	-0.007	0.004	0.06669
1	4	rs12025777	rs35190461	T	C	41543135	4.739	2.15e-06	0.635548	T	C	0.0271859	0.00482761	1.78826e-08	T	C	0.0315123	0.00950885	0.0009191	T	C	0.007	0.004	0.06685
1	4	rs12025777	rs35147684	T	C	41548385	NA	NA	0.62314	T	C	-0.0217911	0.00695358	0.00172556	T	C	-0.0299846	0.00953101	0.001653	T	C	-0.007	0.004	0.07216
1	4	rs12025777	rs35395205	G	A	41550741	NA	NA	0.635548	A	G	0.0222803	0.00692239	0.00128826	A	G	0.0310833	0.00948819	0.001054	A	G	0.007	0.004	0.06812
1	4	rs12025777	rs34660906	T	C	41551968	-4.254	2.1e-05	0.722765	T	C	-0.0260729	0.00511274	3.40371e-07	T	C	-0.0317383	0.00999004	0.00149	T	C	-0.007	0.004	0.09611
1	4	rs12025777	rs12022978	A	G	41554088	4.722	2.33e-06	0.635548	A	G	0.0253018	0.00458996	3.53918e-08	A	G	0.023819	0.0079054	0.002585	A	G	0.007	0.004	0.08784
1	4	rs12025777	rs144485091	T	C	41558595	4.76	1.94e-06	0.635548	T	C	0.0282003	0.00490053	8.68704e-09	T	C	0.0315412	0.00950895	0.0009114	T	C	0.007	0.004	0.07976
1	4	rs12025777	rs12736881	A	G	41558996	-4.733	2.22e-06	0.635548	A	G	-0.0272419	0.00482743	1.66972e-08	A	G	-0.0315019	0.00950856	0.0009236	A	G	-0.007	0.004	0.06888
1	4	rs12025777	rs34386859	T	C	41564024	-4.831	1.36e-06	0.616442	T	C	-0.0274711	0.00481	1.12143e-08	T	C	-0.0321817	0.009468	0.000677	T	C	-0.006	0.004	0.1307
1	4	rs12025777	rs2300649	T	C	41569203	4.784	1.72e-06	0.635548	T	C	0.0253205	0.00458977	3.45379e-08	T	C	0.0238145	0.00790654	0.002595	T	C	0.007	0.004	0.07048
1	4	rs12025777	rs11209531	T	C	41571021	-4.753	2.01e-06	0.635548	T	C	-0.0252801	0.0045896	3.62656e-08	T	C	-0.0237303	0.00790747	0.002695	T	C	-0.007	0.004	0.07326
1	4	rs12025777	rs3820090	A	G	41573652	4.761	1.92e-06	0.661964	A	G	0.0277766	0.00486737	1.15189e-08	A	G	0.031883	0.00961779	0.0009157	A	G	0.008	0.004	0.04767
1	4	rs12025777	rs3904243	T	G	41574852	4.77	1.84e-06	0.648041	T	G	0.0273059	0.00482651	1.536e-08	T	G	0.0315443	0.00950416	0.0009039	T	G	0.007	0.004	0.07047
1	4	rs12025777	rs11209545	T	G	41576357	4.779	1.76e-06	0.648041	T	G	0.0272753	0.00482614	1.58975e-08	T	G	0.0314431	0.00951093	0.0009454	T	G	0.007	0.004	0.06838
1	4	rs12025777	rs11209576	T	C	41586029	4.754	1.99e-06	0.648041	T	C	0.0253372	0.00458995	3.38694e-08	T	C	0.02371	0.0079086	0.002722	T	C	0.007	0.004	0.07055
1	4	rs12025777	rs3766324	A	G	41588653	4.783	1.73e-06	0.648041	A	G	0.0273437	0.00482743	1.47673e-08	A	G	0.0317876	0.00952866	0.0008505	A	G	0.007	0.004	0.06554
1	4	rs12025777	rs12041523	T	G	41598029	4.664	3.11e-06	0.648041	NA	NA	NA	NA	NA	NA	NA	NA	NA	NA	NA	NA	NA	NA	NA
1	4	rs12025777	rs12759023	T	C	41603978	4.774	1.81e-06	0.648041	T	C	0.0254692	0.0045917	2.90975e-08	T	C	0.0238825	0.00790812	0.002526	T	C	0.007	0.004	0.06844
1	4	rs12025777	rs34286980	A	G	41608389	4.756	1.98e-06	0.648041	A	G	0.0273551	0.00482872	1.46948e-08	A	G	0.0313864	0.00951104	0.0009673	A	G	0.007	0.004	0.07091
1	4	rs12025777	rs35071528	C	G	41612657	4.35	1.36e-05	0.722723	C	G	0.0266328	0.00511335	1.90396e-07	C	G	0.0324761	0.00999879	0.001164	C	G	0.007	0.004	0.1129
1	4	rs12025777	rs71648534	T	G	41613747	-4.758	1.95e-06	0.648041	T	G	-0.0266845	0.0048278	3.25263e-08	T	G	-0.0311289	0.00966735	0.001283	T	G	-0.006	0.004	0.1008
1	4	rs12025777	rs71648535	A	G	41613750	-4.766	1.88e-06	0.648041	A	G	-0.0267161	0.00482761	3.1298e-08	A	G	-0.0312345	0.00965815	0.001222	A	G	-0.006	0.004	0.1003
1	4	rs12025777	rs12048187	A	G	41616183	4.774	1.81e-06	0.648041	A	G	0.0273	0.00482761	1.55881e-08	A	G	0.0312039	0.00951338	0.00104	A	G	0.007	0.004	0.07341
1	4	rs12025777	rs12741932	A	C	41621182	4.781	1.74e-06	0.648041	A	C	0.0273266	0.00482872	1.52097e-08	A	C	0.0311779	0.00950257	0.001033	A	C	0.007	0.004	0.0657
1	4	rs12025777	rs71648536	A	T	41632008	-4.764	1.9e-06	0.648041	A	T	-0.0267703	0.00482835	2.94971e-08	A	T	-0.0290729	0.00956033	0.00236	A	T	-0.007	0.004	0.06614
1	4	rs12025777	rs12744845	C	G	41642700	4.799	1.59e-06	0.648041	NA	NA	NA	NA	NA	C	G	0.0237523	0.00790953	0.002672	NA	NA	NA	NA	NA
1	4	rs12025777	rs12405355	G	T	41644485	NA	NA	0.648041	NA	NA	NA	NA	NA	T	G	0.0312676	0.00951251	0.001012	NA	NA	NA	NA	NA
1	4	rs12025777	rs12036051	G	A	41647664	NA	NA	0.648041	A	G	0.0223823	0.00694004	0.00125927	A	G	0.0312577	0.00951237	0.001015	A	G	0.007	0.004	0.06826
1	4	rs12025777	rs12742803	A	G	41648131	-4.82	1.44e-06	0.648041	A	G	-0.0273256	0.00482854	1.52097e-08	A	G	-0.0312577	0.00951237	0.001015	A	G	-0.007	0.004	0.06751
1	4	rs12025777	rs12408956	A	G	41651952	-4.809	1.52e-06	0.648041	A	G	-0.0253204	0.00459119	3.48772e-08	A	G	-0.0234439	0.0079149	0.003053	A	G	-0.007	0.004	0.06882
1	4	rs12025777	rs35992757	T	C	41652862	-4.811	1.5e-06	0.648041	T	C	-0.0273093	0.00482854	1.55117e-08	T	C	-0.0312574	0.0095123	0.001017	T	C	-0.007	0.004	0.07093
1	4	rs12025777	rs12044539	A	C	41661732	4.818	1.45e-06	0.648041	A	C	0.025348	0.00459118	3.37043e-08	A	C	0.0236518	0.0079103	0.002785	A	C	0.007	0.004	0.06805
1	4	rs12025777	rs12759050	A	T	41664204	-4.816	1.46e-06	0.648041	A	T	-0.0272919	0.00482835	1.58196e-08	A	T	-0.0312719	0.0095138	0.001013	A	T	-0.007	0.004	0.06953
1	4	rs12025777	rs71648538	C	G	41666087	-4.881	1.06e-06	0.648041	C	G	-0.027296	0.00482835	1.57421e-08	C	G	-0.0312766	0.00951233	0.001008	C	G	-0.007	0.004	0.06792
1	4	rs12025777	rs35967406	T	C	41670853	4.827	1.39e-06	0.648041	T	C	0.0273011	0.00482854	1.56649e-08	T	C	0.0312766	0.00951233	0.001008	T	C	0.007	0.004	0.06141
1	4	rs12025777	rs34216154	A	G	41670907	-4.843	1.28e-06	0.648041	A	G	-0.027293	0.00482854	1.58196e-08	A	G	-0.0312487	0.00950965	0.001016	A	G	-0.007	0.004	0.06814
1	4	rs12025777	rs12045995	G	A	41673608	NA	NA	0.648041	A	G	0.0223782	0.00694017	0.00126214	A	G	0.0312487	0.00951255	0.001019	A	G	0.007	0.004	0.06957
1	4	rs12025777	rs1032728	A	T	41679566	4.913	8.95e-07	0.660622	NA	NA	NA	NA	NA	A	T	0.0292264	0.00947064	0.002026	NA	NA	NA	NA	NA
1	4	rs12025777	rs12029321	C	G	41682530	-4.81	1.51e-06	0.660622	C	G	-0.0270667	0.00482817	2.07046e-08	C	G	-0.0301445	0.00950632	0.00152	C	G	-0.007	0.004	0.07145
1	4	rs12025777	rs35286837	T	G	41682998	4.84	1.3e-06	0.660622	T	G	0.0269119	0.00482817	2.49047e-08	T	G	0.0294427	0.00948847	0.001918	T	G	0.007	0.004	0.0647
1	4	rs12025777	rs11209734	T	C	41698074	-4.769	1.85e-06	0.660622	T	C	-0.0256457	0.00459083	2.31975e-08	T	C	-0.0245851	0.00791792	0.0019	T	C	-0.007	0.004	0.06865
1	4	rs12025777	rs12037037	T	C	41698256	-4.782	1.73e-06	0.660622	T	C	-0.0256141	0.00459083	2.41326e-08	T	C	-0.0244526	0.00790834	0.001986	T	C	-0.007	0.004	0.06993
1	4	rs12025777	rs34813691	A	G	41700332	-4.824	1.41e-06	0.660622	A	G	-0.0273286	0.00482835	1.51351e-08	A	G	-0.0313416	0.00951477	0.0009866	A	G	-0.007	0.004	0.05126
1	4	rs12025777	rs8179465	A	G	41701747	-4.801	1.58e-06	0.660622	A	G	-0.0256141	0.00459083	2.41326e-08	A	G	-0.0244482	0.00790694	0.001991	A	G	-0.007	0.004	0.06676
1	4	rs12025777	rs12754476	A	C	41707651	NA	NA	0.660622	A	C	-0.0233469	0.00694012	0.000768087	A	C	-0.0310298	0.00951249	0.001105	A	C	-0.008	0.004	0.03842
1	4	rs12025777	rs2363805	T	G	41719434	-4.724	2.31e-06	0.660622	T	G	-0.0272451	0.00482872	1.67792e-08	T	G	-0.0311788	0.00951442	0.001048	T	G	-0.007	0.004	0.06685
1	4	rs12025777	rs71648540	A	G	41722295	-4.812	1.5e-06	0.660622	A	G	-0.0272981	0.00482872	1.57421e-08	A	G	-0.0313243	0.0095095	0.0009874	A	G	-0.007	0.004	0.0715
1	4	rs12025777	rs10524	T	C	41726473	4.946	7.59e-07	0.640454	T	C	0.0270565	0.00481401	1.90564e-08	T	C	0.0302789	0.00947697	0.0014	T	C	0.007	0.004	0.05147
1	4	rs12025777	rs111309254	A	G	41736000	4.843	1.28e-06	0.640454	A	G	0.0275008	0.00482282	1.18253e-08	A	G	0.0317694	0.00950894	0.0008346	A	G	0.007	0.004	0.07801
1	4	rs12025777	rs4131949	T	C	41738637	-4.902	9.48e-07	0.640454	T	C	-0.0258453	0.00463063	2.38613e-08	T	C	-0.0254111	0.00817604	0.001883	T	C	-0.007	0.004	0.07321
1	4	rs12025777	rs35813191	T	C	41742800	4.925	8.44e-07	0.640454	T	C	0.0273631	0.0048208	1.37831e-08	T	C	0.0313444	0.00950406	0.0009732	T	C	0.007	0.004	0.07211
1	4	rs12025777	rs35883594	A	G	41744093	4.97	6.69e-07	0.640454	A	G	0.0276181	0.00482411	1.03425e-08	A	G	0.0318135	0.00951076	0.0008224	A	G	0.007	0.004	0.07217
1	4	rs12025777	rs16828019	T	C	41745035	-4.989	6.08e-07	0.640454	T	C	-0.0276946	0.00470482	3.94607e-09	T	C	-0.030682	0.00862581	0.000375	T	C	-0.007	0.004	0.07134
1	4	rs12025777	rs12025777	T	G	41748897	-5.725	1.04e-08	1	T	G	-0.0357291	0.00544462	5.29933e-11	T	G	-0.0404177	0.0103264	9.067e-05	T	G	-0.009	0.004	0.04765
1	4	rs1343775	rs12035012	A	C	41750648	-8.336	7.7e-17	1	A	C	-0.0318854	0.00362591	1.44628e-18	A	C	-0.037609	0.00659807	1.201e-08	A	C	-0.014	0.003	3.847e-06
1	4	rs1343775	rs34762587	T	C	41752465	5.1	3.39e-07	0.60348	T	C	0.0166121	0.00329419	4.58657e-07	T	C	0.0221169	0.00649161	0.0006574	T	C	0.008	0.003	0.002702
1	4	rs1343775	rs12029950	A	G	41753165	-8.242	1.7e-16	0.994375	A	G	-0.0305958	0.00353055	4.47576e-18	A	G	-0.033049	0.00605404	4.789e-08	A	G	-0.014	0.003	3.826e-06
1	4	rs1343775	rs35318047	T	C	41755166	-8.26	1.46e-16	1	T	C	-0.0314236	0.00371226	2.56595e-17	T	C	-0.0376672	0.00728431	2.328e-07	T	C	-0.014	0.003	2.612e-06
1	4	rs1343775	rs35493284	A	T	41755189	-8.268	1.36e-16	1	A	T	-0.031492	0.0037122	2.18769e-17	A	T	-0.0378471	0.0072811	2.015e-07	A	T	-0.014	0.003	2.57e-06
1	4	rs1343775	rs12027685	A	G	41756298	-8.244	1.67e-16	0.994375	A	G	-0.0305321	0.00353055	5.24272e-18	A	G	-0.0330441	0.00604871	4.676e-08	A	G	-0.014	0.003	4.255e-06
1	4	rs1343775	rs12024413	A	G	41756416	8.255	1.52e-16	0.994375	A	G	0.0305862	0.00353015	4.54376e-18	A	G	0.0331254	0.00604808	4.315e-08	A	G	0.014	0.003	3.949e-06
1	4	rs1343775	rs34027267	T	C	41756677	8.244	1.66e-16	0.994375	T	C	0.0312637	0.003713	3.76272e-17	T	C	0.037408	0.00727498	2.718e-07	T	C	0.014	0.003	4.147e-06
1	4	rs1343775	rs12025254	A	G	41756906	8.253	1.55e-16	1	A	G	0.0313144	0.00371269	3.32865e-17	A	G	0.037469	0.00727554	2.607e-07	A	G	0.014	0.003	4.602e-06
1	4	rs1343775	rs12722758	A	G	41757015	-8.233	1.83e-16	0.994375	A	G	-0.0305948	0.00353079	4.50963e-18	A	G	-0.0332549	0.00605295	3.919e-08	A	G	-0.014	0.003	4.048e-06
1	4	rs1343775	rs12723893	T	C	41757040	-8.243	1.68e-16	0.994375	T	C	-0.03165	0.00362123	2.32872e-18	T	C	-0.0376339	0.00660012	1.184e-08	T	C	-0.014	0.003	4.726e-06
1	4	rs1343775	rs12035913	T	C	41757057	-8.259	1.47e-16	0.994375	T	C	-0.0305584	0.00353079	4.93634e-18	T	C	-0.0331235	0.00604885	4.351e-08	T	C	-0.014	0.003	4.057e-06
1	4	rs1343775	rs1343776	A	G	41757718	-8.238	1.75e-16	0.994375	A	G	-0.0304902	0.00353061	5.82467e-18	A	G	-0.0329408	0.00605196	5.226e-08	A	G	-0.014	0.003	4.823e-06
1	4	rs1343775	rs1343775	A	G	41757993	8.339	7.5e-17	1	A	G	0.0306828	0.00353359	3.84875e-18	A	G	0.0329122	0.00605448	5.451e-08	A	G	0.014	0.003	4.963e-06
1	4	rs1343775	rs12749636	A	G	41758446	8.247	1.63e-16	1	A	G	0.0312966	0.00371318	3.50105e-17	A	G	0.0374688	0.0072755	2.6e-07	A	G	0.014	0.003	4.657e-06
1	4	rs1343775	rs60552457	A	C	41759499	-8.188	2.67e-16	0.994375	A	C	-0.0312459	0.00371349	3.95727e-17	A	C	-0.0374607	0.00727817	2.646e-07	A	C	-0.014	0.003	4.434e-06
1	4	rs1343775	rs12739950	T	C	41759891	-8.233	1.83e-16	0.994375	T	C	-0.0304972	0.00353459	6.232e-18	T	C	-0.0333519	0.00606618	3.843e-08	T	C	-0.014	0.003	4.804e-06
1	4	rs1343775	rs12740093	T	C	41760001	-8.236	1.78e-16	0.994375	T	C	-0.0305361	0.00353102	5.24272e-18	T	C	-0.0330991	0.00604882	4.438e-08	T	C	-0.014	0.003	4.603e-06
1	4	rs1343775	rs12038894	T	C	41760207	-8.234	1.81e-16	0.994375	T	C	-0.0300929	0.00353096	1.56046e-17	T	C	-0.0316842	0.00604892	1.62e-07	T	C	-0.014	0.003	4.796e-06
1	4	rs1343775	rs12038924	T	C	41760317	-8.234	1.81e-16	0.994375	T	C	-0.0305179	0.00353102	5.48474e-18	T	C	-0.0330359	0.00604831	4.71e-08	T	C	-0.014	0.003	4.735e-06
1	4	rs1343775	rs12032514	A	G	41760562	-8.232	1.84e-16	0.994375	A	G	-0.0305392	0.00353102	5.20342e-18	A	G	-0.0331052	0.00604882	4.426e-08	A	G	-0.014	0.003	4.799e-06
1	4	rs1343775	rs12039767	T	C	41760860	-8.227	1.92e-16	0.994375	T	C	-0.0305644	0.00353079	4.86256e-18	T	C	-0.0331988	0.00604714	4.012e-08	T	C	-0.014	0.003	4.069e-06
1	4	rs1343775	rs12030183	T	C	41761220	5.126	2.96e-07	0.600728	T	C	0.0168324	0.00313259	7.7303e-08	T	C	0.0213999	0.00539719	7.34e-05	T	C	0.008	0.003	0.002195
1	4	rs1343775	rs12731400	T	C	41761352	8.283	1.2e-16	1	T	C	0.0306312	0.00353044	4.0884e-18	T	C	0.0331318	0.00604816	4.31e-08	T	C	0.014	0.003	3.739e-06
1	4	rs1343775	rs12032756	A	G	41761429	-8.258	1.48e-16	1	A	G	-0.0306068	0.00353043	4.34277e-18	A	G	-0.0331302	0.00606114	4.595e-08	A	G	-0.014	0.003	3.49e-06
1	4	rs1343775	rs55859000	T	C	41761441	8.276	1.27e-16	1	T	C	0.0313374	0.00371282	3.16463e-17	T	C	0.0374369	0.00729054	2.818e-07	T	C	0.014	0.003	3.588e-06
1	4	rs1343775	rs12031068	T	C	41761715	8.273	1.31e-16	1	T	C	0.030851	0.00371263	9.59215e-17	T	C	0.0374503	0.00728464	2.737e-07	T	C	0.013	0.003	2.673e-05
1	4	rs1343775	rs12040690	C	G	41761737	8.226	1.93e-16	0.994375	C	G	0.0308129	0.00371257	1.04462e-16	C	G	0.0372729	0.00728271	3.096e-07	C	G	0.013	0.003	1.225e-05
1	4	rs1343775	rs12030372	A	G	41762029	8.277	1.26e-16	1	A	G	0.030518	0.00352997	5.36238e-18	A	G	0.0329136	0.00604808	5.28e-08	A	G	0.014	0.003	3.366e-06
1	4	rs1343775	rs12030420	A	T	41762156	5.081	3.75e-07	0.60348	A	T	0.0170953	0.00321279	1.03196e-07	A	T	0.0232766	0.00588536	7.658e-05	A	T	0.008	0.003	0.004592
1	4	rs1343775	rs12032162	T	C	41762935	8.239	1.73e-16	1	T	C	0.0306352	0.0035302	4.02714e-18	T	C	0.0331311	0.00604804	4.299e-08	T	C	0.014	0.003	3.541e-06
1	4	rs1343775	rs12031417	A	G	41763028	8.24	1.72e-16	1	A	G	0.0313666	0.00371257	2.94406e-17	A	G	0.037651	0.00730804	2.577e-07	A	G	0.014	0.003	2.186e-06
1	4	rs1343775	rs12037560	A	C	41763891	-8.223	1.99e-16	1	A	C	-0.0306509	0.00353061	3.90733e-18	A	C	-0.0332004	0.00604854	4.052e-08	A	C	-0.014	0.003	4.181e-06
1	4	rs1343775	rs12037588	C	G	41763955	8.223	1.98e-16	1	C	G	0.0313055	0.00371312	3.42612e-17	C	G	0.0372451	0.00727727	3.089e-07	C	G	0.014	0.003	4.21e-06
1	4	rs1343775	rs12037657	T	C	41764175	-8.267	1.37e-16	1	T	C	-0.0308059	0.00352788	2.49927e-18	T	C	-0.0339541	0.00604595	1.956e-08	T	C	-0.014	0.003	5.298e-06
1	4	rs1343775	rs36143444	T	C	41764310	NA	NA	0.955837	NA	NA	NA	NA	NA	T	C	-0.0378495	0.00722457	1.614e-07	NA	NA	NA	NA	NA
1	4	rs1343775	rs12027990	T	C	41764437	8.248	1.61e-16	1	T	C	0.0312315	0.00371177	3.95727e-17	T	C	0.0374063	0.00728458	2.818e-07	T	C	0.014	0.003	4.789e-06
1	4	rs1343775	rs12028010	T	C	41764471	8.113	4.93e-16	0.950827	T	C	0.0299426	0.00356577	4.57186e-17	T	C	0.0378549	0.00650539	5.927e-09	T	C	0.013	0.003	6.791e-06
1	4	rs1343775	rs34190295	T	C	41765879	8.207	2.27e-16	0.994375	T	C	0.0312029	0.00371061	4.1319e-17	T	C	0.0380939	0.00727261	1.621e-07	T	C	0.014	0.003	5.057e-06
1	4	rs1343775	rs34961305	A	G	41765944	8.211	2.19e-16	0.994375	A	G	0.0308211	0.00371055	9.8689e-17	A	G	0.0385645	0.00726946	1.128e-07	A	G	0.013	0.003	5.352e-06
1	4	rs1343775	rs35812095	T	C	41766074	8.216	2.1e-16	0.994375	T	C	0.0307366	0.00371055	1.19543e-16	T	C	0.038208	0.00726803	1.466e-07	T	C	0.013	0.003	5.281e-06
1	4	rs1343775	rs2364535	A	G	41766236	-8.188	2.66e-16	0.988707	A	G	-0.0302766	0.00352828	9.39492e-18	A	G	-0.0343013	0.00604322	1.381e-08	A	G	-0.013	0.003	5.582e-06
1	4	rs1343775	rs12030762	T	C	41766761	8.279	1.24e-16	0.983164	T	C	0.0303849	0.00353665	8.58928e-18	T	C	0.0342902	0.00604339	1.398e-08	T	C	0.013	0.003	5.421e-06
1	4	rs1343775	rs35529558	A	G	41767022	8.21	2.21e-16	0.994375	A	G	0.0311836	0.00371055	4.31413e-17	A	G	0.0379784	0.00726303	1.701e-07	A	G	0.014	0.003	4.71e-06
1	4	rs1343775	rs12034357	A	G	41768229	NA	NA	0.994375	A	G	-0.0321376	0.00481247	2.42253e-11	A	G	-0.0343025	0.00604237	1.367e-08	A	G	-0.014	0.003	4.902e-06
1	4	rs1343775	rs7553908	T	G	41768241	NA	NA	0.994375	NA	NA	NA	NA	NA	T	G	-0.0384182	0.00726792	1.25e-07	NA	NA	NA	NA	NA
1	4	rs1343775	rs12031169	G	A	41768251	NA	NA	0.994375	A	G	0.0321678	0.00481283	2.32879e-11	A	G	0.0343534	0.00604281	1.31e-08	A	G	0.014	0.003	4.578e-06
1	4	rs1343775	rs12041533	T	C	41768271	-8.273	1.31e-16	0.994375	T	C	-0.030886	0.00353671	2.48036e-18	T	C	-0.0350618	0.00630267	2.657e-08	T	C	-0.014	0.003	4.504e-06
1	4	rs1343775	rs35502198	T	G	41768541	8.259	1.47e-16	0.994375	T	G	0.0314814	0.0037154	2.38662e-17	T	G	0.0388534	0.00727865	9.414e-08	T	G	0.014	0.003	4.895e-06
1	4	rs1343775	rs34862272	A	C	41768653	8.197	2.45e-16	0.994375	A	C	0.0312869	0.00371055	3.40149e-17	A	C	0.0384277	0.00726833	1.242e-07	A	C	0.014	0.003	5.161e-06
1	4	rs1343775	rs34796305	A	G	41769045	8.211	2.19e-16	0.994375	A	G	0.0313104	0.00371073	3.23393e-17	A	G	0.0384339	0.00726814	1.236e-07	A	G	0.014	0.003	5.014e-06
1	4	rs1343775	rs55707527	T	G	41769113	-8.277	1.26e-16	0.983137	T	G	-0.0303427	0.00372719	3.92268e-16	T	G	-0.0368881	0.00740428	6.281e-07	T	G	-0.013	0.003	1.31e-05
1	4	rs1343775	rs36060279	A	T	41769114	8.277	1.26e-16	0.983137	NA	NA	NA	NA	NA	A	T	0.0368738	0.0074029	6.338e-07	NA	NA	NA	NA	NA
1	4	rs1343775	rs35972058	A	G	41769146	-8.132	4.21e-16	0.988739	A	G	-0.0301243	0.00372313	5.91144e-16	A	G	-0.0363239	0.00734706	7.66e-07	A	G	-0.013	0.003	1.141e-05
1	4	rs1343775	rs12032906	T	C	41769158	8.12	4.67e-16	0.988739	T	C	0.0296744	0.00354031	5.20899e-17	T	C	0.0330317	0.00613516	7.299e-08	T	C	0.013	0.003	8.752e-06
1	4	rs1343775	rs34315814	T	C	41769172	8.095	5.73e-16	0.988739	T	C	0.0302808	0.00372189	4.09019e-16	T	C	0.037486	0.00734732	3.365e-07	T	C	0.013	0.003	6.884e-06
1	4	rs1343775	rs12032191	A	G	41769218	8.16	3.36e-16	0.994375	A	G	0.0310956	0.00371239	5.46745e-17	A	G	0.0383946	0.00727446	1.303e-07	A	G	0.014	0.003	4.928e-06
1	4	rs1343775	rs12032215	A	G	41769334	8.214	2.14e-16	0.994375	A	G	0.0310676	0.00371092	5.6669e-17	A	G	0.0376301	0.00727714	2.329e-07	A	G	0.014	0.003	4.812e-06
1	4	rs1343775	rs12035353	A	G	41769337	-8.176	2.93e-16	0.994375	A	G	-0.0309143	0.00371018	7.92943e-17	A	G	-0.0375468	0.00727652	2.472e-07	A	G	-0.014	0.003	4.836e-06
1	4	rs1343775	rs2364534	A	G	41770055	8.2	2.41e-16	0.994375	A	G	0.0313647	0.00371049	2.83954e-17	A	G	0.038787	0.00727984	9.916e-08	A	G	0.014	0.003	3.603e-06
1	4	rs1343775	rs2364533	C	G	41770083	8.209	2.23e-16	0.994375	C	G	0.0313898	0.00371049	2.67986e-17	C	G	0.0388853	0.0072778	9.142e-08	C	G	0.014	0.003	3.66e-06
1	4	rs1343775	rs68132196	A	C	41770620	-8.204	2.32e-16	0.988739	A	C	-0.0313277	0.00371018	3.07452e-17	A	C	-0.0385109	0.00727033	1.179e-07	A	C	-0.014	0.003	4.548e-06
1	4	rs1343775	rs56381773	T	C	41770718	8.211	2.2e-16	0.994375	T	C	0.031324	0.00371012	3.0968e-17	T	C	0.0384759	0.00726782	1.199e-07	T	C	0.014	0.003	4.056e-06
1	4	rs1343775	rs56096486	A	C	41771230	8.207	2.27e-16	0.994375	A	C	0.0313334	0.00371012	3.03041e-17	A	C	0.0384738	0.0072688	1.206e-07	A	C	0.014	0.003	3.823e-06
1	4	rs1343775	rs57529969	A	G	41771683	-8.206	2.28e-16	0.994375	A	G	-0.0312979	0.00371	3.28095e-17	A	G	-0.0383902	0.00726812	1.276e-07	A	G	-0.014	0.003	3.469e-06
1	4	rs1343775	rs60825180	A	G	41771744	8.208	2.26e-16	0.994375	A	G	0.0313266	0.00371006	3.07452e-17	A	G	0.0384738	0.0072688	1.206e-07	A	G	0.014	0.003	3.611e-06
1	4	rs1343775	rs61477144	A	G	41771793	8.213	2.16e-16	0.994375	A	G	0.0313261	0.00371	3.07452e-17	A	G	0.0384344	0.00726824	1.236e-07	A	G	0.014	0.003	3.435e-06
1	4	rs1343775	rs7521544	A	G	41772126	-8.197	2.47e-16	0.994375	A	G	-0.0307342	0.00352764	2.97576e-18	A	G	-0.0342618	0.00604264	1.425e-08	A	G	-0.014	0.003	3.263e-06
1	4	rs1343775	rs7513682	T	C	41772167	8.207	2.27e-16	0.994375	T	C	0.0313162	0.00370994	3.14186e-17	T	C	0.0384344	0.00726824	1.236e-07	T	C	0.014	0.003	3.28e-06
1	4	rs1343775	rs7556585	A	G	41772417	8.179	2.87e-16	0.994375	A	G	0.031037	0.00371025	6.00104e-17	A	G	0.0374654	0.00727907	2.65e-07	A	G	0.014	0.003	3.292e-06
1	4	rs1343775	rs12038386	A	G	41772442	-8.192	2.56e-16	0.994375	A	G	-0.0312154	0.00371061	4.01465e-17	A	G	-0.0381806	0.00727943	1.559e-07	A	G	-0.014	0.003	3.512e-06
1	4	rs1343775	rs56409354	A	G	41772971	-8.187	2.69e-16	0.988739	A	G	-0.0313658	0.00370951	2.77859e-17	A	G	-0.0386045	0.00727151	1.1e-07	A	G	-0.014	0.003	2.891e-06
1	4	rs1343775	rs34008156	T	G	41773182	-8.203	2.34e-16	0.994375	T	G	-0.0313314	0.00370951	3.00859e-17	T	G	-0.0384258	0.00726798	1.245e-07	T	G	-0.014	0.003	2.985e-06
1	4	rs1343775	rs12744310	T	C	41773502	-8.195	2.5e-16	0.994375	T	C	-0.0317819	0.00361765	1.56016e-18	T	C	-0.0387178	0.00658914	4.201e-09	T	C	-0.014	0.003	3.067e-06
1	4	rs1343775	rs56077539	T	C	41773942	8.207	2.27e-16	0.994375	T	C	0.0313283	0.00370951	3.03041e-17	T	C	0.0384229	0.00726881	1.253e-07	T	C	0.014	0.003	2.674e-06
1	4	rs1343775	rs55892603	C	T	41773994	NA	NA	0.994375	T	C	0.0335899	0.00530341	2.39446e-10	T	C	0.0384258	0.00726798	1.245e-07	T	C	0.014	0.003	2.659e-06
1	4	rs1343775	rs532841715	T	G	41774019	NA	NA	0.994375	NA	NA	NA	NA	NA	T	G	-0.0384259	0.00726799	1.245e-07	NA	NA	NA	NA	NA
1	4	rs1343775	rs552847408	T	C	41774020	NA	NA	0.994375	NA	NA	NA	NA	NA	T	C	-0.0384259	0.00726799	1.245e-07	NA	NA	NA	NA	NA
1	4	rs1343775	rs566110206	C	T	41774025	NA	NA	0.994375	NA	NA	NA	NA	NA	T	C	0.0384259	0.00726799	1.245e-07	NA	NA	NA	NA	NA
1	4	rs1343775	rs55929643	A	G	41774212	8.238	1.75e-16	0.988707	A	G	0.0313491	0.00370939	2.8809e-17	A	G	0.0385219	0.00726828	1.156e-07	A	G	0.014	0.003	4.512e-06
1	4	rs1343775	rs34759578	A	G	41774350	-8.208	2.26e-16	0.994375	A	G	-0.0313116	0.00370939	3.14186e-17	A	G	-0.0383411	0.00726569	1.312e-07	A	G	-0.014	0.003	2.89e-06
1	4	rs1343775	rs72665690	C	G	41775236	8.225	1.95e-16	0.994375	C	G	0.0311389	0.00370933	4.66904e-17	C	G	0.0376134	0.00728096	2.398e-07	C	G	0.014	0.003	3.766e-06
1	4	rs1343775	rs72665691	A	T	41775245	-8.233	1.83e-16	0.994375	A	T	-0.0311044	0.00370933	5.05271e-17	A	T	-0.0374659	0.00728059	2.666e-07	A	T	-0.014	0.003	3.561e-06
1	4	rs1343775	rs72665692	A	G	41775379	8.213	2.15e-16	0.988707	A	G	0.0307176	0.00370939	1.22113e-16	A	G	0.0379677	0.00728049	1.837e-07	A	G	0.013	0.003	7.465e-06
1	4	rs1343775	rs72665694	A	G	41775384	8.212	2.17e-16	0.988707	A	G	0.0307176	0.00370939	1.22113e-16	A	G	0.0379677	0.00728049	1.837e-07	A	G	0.013	0.003	7.473e-06
1	4	rs1343775	rs72665696	T	G	41775429	-8.244	1.66e-16	0.988707	T	G	-0.0308688	0.00371478	9.59215e-17	T	G	-0.0382073	0.00726928	1.469e-07	T	G	-0.013	0.003	6.38e-06
1	4	rs1343775	rs72665698	T	G	41775589	8.238	1.76e-16	0.988707	T	G	0.0309312	0.00370835	7.36919e-17	T	G	0.0382682	0.00726289	1.37e-07	T	G	0.013	0.003	7.42e-06
1	4	rs1343775	rs12751511	A	T	41776403	8.214	2.14e-16	0.988707	A	T	0.0304254	0.00353219	7.07024e-18	A	T	0.0343803	0.00604436	1.287e-08	A	T	0.013	0.003	5.953e-06
1	4	rs1343775	rs34073585	T	C	41777199	8.268	1.36e-16	0.988707	T	C	0.0310278	0.00371392	6.57322e-17	T	C	0.0384071	0.00726719	1.256e-07	T	C	0.013	0.003	7.554e-06
1	4	rs1343775	rs12756822	G	A	41777327	NA	NA	0.988707	A	G	0.0308851	0.00490454	3.02959e-10	A	G	0.0355418	0.00624965	1.296e-08	A	G	0.012	0.003	3.272e-05
1	4	rs1343775	rs12036554	T	G	41777989	8.202	2.36e-16	0.988707	T	G	0.0304803	0.00370909	2.0739e-16	T	G	0.0370806	0.00731228	3.95e-07	T	G	0.013	0.003	2.596e-05
1	4	rs1343775	rs12036555	T	C	41777990	8.209	2.23e-16	0.988707	T	C	0.0304177	0.00370909	2.38692e-16	T	C	0.036818	0.00731096	4.751e-07	T	C	0.013	0.003	1.473e-05
1	4	rs1343775	rs1892417	T	C	41779673	7.832	4.8e-15	0.935176	T	C	0.0298919	0.00358702	7.85889e-17	T	C	0.0358561	0.0065383	4.152e-08	T	C	0.013	0.003	7.313e-06
1	4	rs1343775	rs1892419	T	C	41781151	7.877	3.36e-15	0.901814	T	C	0.0290793	0.00348861	7.71705e-17	T	C	0.0318016	0.00596876	9.935e-08	T	C	0.013	0.003	5.54e-06
1	4	rs1343775	rs1892420	T	C	41781410	-7.747	9.44e-15	0.906965	T	C	-0.029779	0.00367787	5.64196e-16	T	C	-0.0350397	0.00719796	1.125e-06	T	C	-0.014	0.003	2.229e-06
1	4	rs1343775	rs28541673	A	G	41781994	7.799	6.26e-15	0.906965	A	G	0.0298618	0.00367583	4.51745e-16	A	G	0.0349644	0.00719729	1.188e-06	A	G	0.014	0.003	2.445e-06
1	4	rs1343775	rs12724625	C	G	41782270	-7.783	7.09e-15	0.906965	C	G	-0.0291241	0.00349549	7.95451e-17	C	G	-0.0308761	0.00598258	2.451e-07	C	G	-0.014	0.003	2.376e-06
1	4	rs1343775	rs12041352	T	G	41782781	7.787	6.84e-15	0.906965	T	G	0.0291318	0.00349532	7.7832e-17	T	G	0.0309444	0.00598769	2.372e-07	T	G	0.014	0.003	2.853e-06
1	4	rs1343775	rs28566545	A	G	41783233	-7.788	6.83e-15	0.906965	A	G	-0.0298188	0.00367589	4.97928e-16	A	G	-0.0347295	0.00719633	1.39e-06	A	G	-0.014	0.003	2.732e-06
1	4	rs1343775	rs16828067	A	G	41783552	7.806	5.89e-15	0.906965	A	G	0.0298161	0.0036767	5.08414e-16	A	G	0.0344442	0.00719988	1.72e-06	A	G	0.014	0.003	2.779e-06
1	4	rs1343775	rs16828071	A	G	41783603	-7.797	6.33e-15	0.906965	A	G	-0.0298899	0.00367624	4.27278e-16	A	G	-0.034778	0.00719892	1.357e-06	A	G	-0.014	0.003	2.76e-06
1	4	rs1343775	rs2363810	A	G	41783873	-7.842	4.43e-15	0.906965	A	G	-0.0290431	0.00349477	9.53444e-17	A	G	-0.0305023	0.00598906	3.532e-07	A	G	-0.014	0.003	3.644e-06
1	4	rs1343775	rs67483852	T	C	41784465	-7.805	5.96e-15	0.906965	T	C	-0.0298847	0.00367636	4.3327e-16	T	C	-0.0347368	0.00719635	1.386e-06	T	C	-0.014	0.003	2.731e-06
1	4	rs1343775	rs36015391	T	G	41784805	7.776	7.49e-15	0.906965	T	G	0.0298823	0.00367531	4.27278e-16	T	G	0.0347498	0.00719606	1.374e-06	T	G	0.014	0.003	3.447e-06
1	4	rs1343775	rs28399806	T	C	41784971	-7.766	8.1e-15	0.906965	T	C	-0.0298224	0.00367595	4.94481e-16	T	C	-0.0350465	0.00719937	1.13e-06	T	C	-0.014	0.003	2.743e-06
1	4	rs1343775	rs12047875	T	C	41785176	NA	NA	0.906965	T	C	-0.0301324	0.00476927	2.64923e-10	T	C	-0.0310136	0.00598834	2.235e-07	T	C	-0.014	0.003	3.563e-06
1	4	rs1343775	rs35932978	A	C	41785445	7.807	5.88e-15	0.906965	A	C	0.0299036	0.00367525	4.06944e-16	A	C	0.0348921	0.00719573	1.243e-06	A	C	0.014	0.003	2.992e-06
1	4	rs1343775	rs12042464	A	G	41786854	-7.744	9.66e-15	0.906965	A	G	-0.0289631	0.00349671	1.20149e-16	A	G	-0.0305643	0.00598478	3.276e-07	A	G	-0.014	0.003	3.638e-06
1	4	rs1343775	rs35021924	A	G	41786907	7.746	9.51e-15	0.906965	A	G	0.0298213	0.00367735	5.08414e-16	A	G	0.0350411	0.00720565	1.158e-06	A	G	0.014	0.003	3.235e-06
1	4	rs1343775	rs12043581	A	G	41788265	-7.756	8.79e-15	0.906965	A	G	-0.0291378	0.00349532	7.67102e-17	A	G	-0.0310336	0.00598297	2.137e-07	A	G	-0.014	0.003	3.288e-06
1	4	rs1343775	rs35592291	A	G	41791271	-7.732	1.06e-14	0.906965	A	G	-0.0298297	0.00367647	4.91057e-16	A	G	-0.0352823	0.00719753	9.473e-07	A	G	-0.014	0.003	3.238e-06
1	4	rs1343775	rs2363811	A	G	41791865	7.752	9.07e-15	0.906965	A	G	0.0291479	0.00349582	7.56044e-17	A	G	0.0311331	0.00597795	1.909e-07	A	G	0.014	0.003	3.411e-06
1	4	rs1343775	rs12026778	T	C	41792274	-7.797	6.33e-15	0.906965	T	C	-0.0290879	0.00349582	8.74083e-17	T	C	-0.0309724	0.00598384	2.262e-07	T	C	-0.014	0.003	3.034e-06
1	4	rs1343775	rs4453028	A	G	41792523	-7.757	8.73e-15	0.906965	A	G	-0.029874	0.00358537	7.93562e-17	A	G	-0.0342385	0.0065241	1.535e-07	A	G	-0.014	0.003	3.117e-06
1	4	rs1343775	rs4406620	A	G	41792765	7.738	1.01e-14	0.906965	A	G	0.029043	0.00349693	9.95748e-17	A	G	0.0309668	0.00598392	2.275e-07	A	G	0.014	0.003	2.948e-06
1	4	rs1343775	rs35436312	A	G	41793358	-7.746	9.45e-15	0.906965	A	G	-0.029863	0.0036756	4.48613e-16	A	G	-0.0349746	0.00720086	1.193e-06	A	G	-0.014	0.003	2.693e-06
1	4	rs1343775	rs1316274	A	G	41793658	-7.779	7.31e-15	0.906965	A	G	-0.0291415	0.00349505	7.56044e-17	A	G	-0.0309569	0.00598202	2.275e-07	A	G	-0.014	0.003	3.058e-06
1	4	rs1343775	rs12037129	T	C	41794301	7.754	8.92e-15	0.906965	T	C	0.0292163	0.00349394	6.16775e-17	T	C	0.0312633	0.0059834	1.746e-07	T	C	0.014	0.003	3.127e-06
1	4	rs1343775	rs17362424	T	G	41794403	-7.696	1.41e-14	0.895814	T	G	-0.030196	0.00366715	1.80806e-16	T	G	-0.0360901	0.00700507	2.576e-07	T	G	-0.014	0.003	1.823e-06
1	4	rs1343775	rs72667608	A	G	41794773	7.778	7.35e-15	0.906965	A	G	0.029973	0.00367577	3.51493e-16	A	G	0.0354641	0.00719937	8.379e-07	A	G	0.014	0.003	2.6e-06
1	4	rs1343775	rs72667610	A	G	41794810	-7.773	7.69e-15	0.906965	A	G	-0.0299305	0.00367589	3.87565e-16	A	G	-0.0352843	0.00719648	9.452e-07	A	G	-0.014	0.003	2.565e-06
1	4	rs1343775	rs35410722	T	C	41796264	-7.76	8.47e-15	0.906965	T	C	-0.0298488	0.00367461	4.54899e-16	T	C	-0.0350842	0.00719677	1.086e-06	T	C	-0.014	0.003	2.652e-06
1	4	rs1343775	rs34539673	A	G	41796817	-7.757	8.69e-15	0.906965	A	G	-0.0298846	0.00367444	4.18444e-16	A	G	-0.0351873	0.00719871	1.019e-06	A	G	-0.014	0.003	3.027e-06
1	4	rs1343775	rs12040046	A	G	41797583	7.776	7.5e-15	0.906965	A	G	0.0291147	0.003494	7.897e-17	A	G	0.0309737	0.00598295	2.259e-07	A	G	0.014	0.003	2.764e-06
1	4	rs1343775	rs35690915	T	C	41797999	7.768	8e-15	0.906965	T	C	0.0299098	0.00367449	3.95756e-16	T	C	0.035277	0.00719646	9.472e-07	T	C	0.014	0.003	2.89e-06
1	4	rs1343775	rs12728217	T	C	41798269	-7.767	8.01e-15	0.906965	T	C	-0.0299098	0.00367449	3.95756e-16	T	C	-0.035277	0.00719646	9.472e-07	T	C	-0.014	0.003	2.986e-06
1	4	rs1343775	rs12752553	T	C	41798517	7.763	8.3e-15	0.906965	T	C	0.0298877	0.00367444	4.15539e-16	T	C	0.0352804	0.00721187	9.968e-07	T	C	0.014	0.003	2.944e-06
1	4	rs1343775	rs12732820	T	C	41798773	-7.766	8.11e-15	0.906965	T	C	-0.0291052	0.00349394	8.07077e-17	T	C	-0.0309525	0.00598232	2.292e-07	T	C	-0.014	0.003	3.289e-06
1	4	rs1343775	rs12045184	A	G	41799611	-7.743	9.73e-15	0.906965	A	G	-0.0299898	0.0036805	3.69095e-16	A	G	-0.0354064	0.00719788	8.703e-07	A	G	-0.014	0.003	2.358e-06
1	4	rs1343775	rs12724690	T	C	41800257	7.761	8.42e-15	0.906965	T	C	0.0290692	0.00349394	8.80439e-17	T	C	0.0308614	0.00598205	2.487e-07	T	C	0.014	0.003	3.06e-06
1	4	rs1343775	rs35464028	T	G	41800474	7.759	8.59e-15	0.906965	T	G	0.0298993	0.00367548	4.12655e-16	T	G	0.0352442	0.00719711	9.725e-07	T	G	0.014	0.003	2.842e-06
1	4	rs1343775	rs34152153	T	C	41801408	7.735	1.03e-14	0.906965	T	C	0.0298182	0.00367467	4.87656e-16	T	C	0.0351451	0.00720186	1.063e-06	T	C	0.014	0.003	3.687e-06
1	4	rs1343775	rs36040148	T	C	41801448	7.714	1.22e-14	0.906965	T	C	0.0298492	0.00367467	4.54899e-16	T	C	0.0352295	0.00719704	9.842e-07	T	C	0.014	0.003	3.394e-06
1	4	rs1343775	rs35807669	T	C	41801652	-7.721	1.15e-14	0.906965	T	C	-0.0298466	0.00367473	4.58075e-16	T	C	-0.0352235	0.00719727	9.888e-07	T	C	-0.014	0.003	3.106e-06
1	4	rs1343775	rs12026404	A	C	41801912	-7.724	1.13e-14	0.906965	A	C	-0.0300495	0.00358372	5.07275e-17	A	C	-0.0349378	0.00652556	8.584e-08	A	C	-0.014	0.003	3.138e-06
1	4	rs1343775	rs12047272	A	G	41801943	-7.723	1.14e-14	0.906965	A	G	-0.0290501	0.00349416	9.26231e-17	A	G	-0.0309639	0.00598452	2.291e-07	A	G	-0.014	0.003	3.151e-06
1	4	rs1343775	rs12047161	T	G	41807528	-7.7	1.36e-14	0.901373	T	G	-0.0288485	0.00349483	1.52385e-16	T	G	-0.0307726	0.00598339	2.71e-07	T	G	-0.014	0.003	3.229e-06
1	4	rs1343775	rs12757611	A	G	41808972	-7.713	1.23e-14	0.901373	A	G	-0.0289642	0.00349466	1.15057e-16	A	G	-0.0309924	0.00599002	2.286e-07	A	G	-0.014	0.003	3.313e-06
1	4	rs1343775	rs12028244	T	C	41809162	-7.696	1.41e-14	0.896217	T	C	-0.0295397	0.00367513	9.15195e-16	T	C	-0.0353515	0.00720136	9.167e-07	T	C	-0.014	0.003	2.528e-06
1	4	rs1343775	rs12046670	T	G	41809312	7.7	1.36e-14	0.901373	T	G	0.0288346	0.00349461	1.56831e-16	T	G	0.0307607	0.00598341	2.737e-07	T	G	0.014	0.003	3.312e-06
1	4	rs1343775	rs12045979	A	G	41809477	7.697	1.39e-14	0.901373	A	G	0.0296208	0.00367212	7.23869e-16	A	G	0.034915	0.007196	1.225e-06	A	G	0.014	0.003	3.812e-06
1	4	rs1343775	rs12047439	A	T	41809640	-7.784	7e-15	0.88455	A	T	-0.0289661	0.00349743	1.21019e-16	A	T	-0.0309668	0.00599666	2.42e-07	A	T	-0.014	0.003	2.661e-06
1	4	rs1343775	rs12048805	A	G	41814276	-7.577	3.55e-14	0.880448	A	G	-0.028382	0.00349726	4.83824e-16	A	G	-0.0296011	0.00599455	7.876e-07	A	G	-0.014	0.003	2.61e-06
1	4	rs1343775	rs12048808	C	G	41814308	-7.496	6.58e-14	0.869408	C	G	-0.0285439	0.00351573	4.70325e-16	C	G	-0.0300709	0.00600576	5.527e-07	C	G	-0.014	0.003	1.508e-06
1	4	rs1343775	rs12022655	T	G	41816319	-7.565	3.89e-14	0.880448	T	G	-0.0293553	0.00367846	1.45937e-15	T	G	-0.0345144	0.00720851	1.683e-06	T	G	-0.014	0.003	2.602e-06
1	4	rs1343775	rs35030637	T	C	41816686	-7.57	3.73e-14	0.880448	T	C	-0.0295345	0.00368532	1.1095e-15	T	C	-0.0350622	0.00720851	1.15e-06	T	C	-0.014	0.003	2.247e-06
1	4	rs1343775	rs12032040	T	C	41818307	-7.561	3.99e-14	0.880448	T	C	-0.0293774	0.00368162	1.46938e-15	T	C	-0.0345767	0.00720799	1.609e-06	T	C	-0.014	0.003	2.612e-06
1	4	rs1343775	rs6660265	T	C	41818676	7.544	4.56e-14	0.880448	T	C	0.0283353	0.00349743	5.41742e-16	T	C	0.0296172	0.00599175	7.707e-07	T	C	0.014	0.003	2.59e-06
1	4	rs1343775	rs12024263	A	G	41820949	7.625	2.43e-14	0.865591	A	G	0.0283108	0.00349626	5.61205e-16	A	G	0.0296076	0.00599101	7.722e-07	A	G	0.014	0.003	2.822e-06
1	4	rs1343775	rs56044892	T	C	41830086	-6.459	1.05e-10	0.720076	T	C	-0.0306467	0.00378593	5.73147e-16	T	C	-0.0378624	0.00743275	3.5e-07	T	C	-0.015	0.003	1.113e-06
1	4	rs10218712	rs10218712	T	G	41832297	5.753	8.79e-09	1	T	G	0.0199116	0.00331524	1.90046e-09	T	G	0.0227111	0.00657911	0.0005574	T	G	0.007	0.003	0.01425
1	4	rs10218712	rs61774743	T	C	41832861	-5.723	1.05e-08	0.923888	T	C	-0.0200744	0.0033021	1.20712e-09	T	C	-0.0242888	0.00654333	0.0002053	T	C	-0.008	0.003	0.004082
1	4	rs1892423	rs2364543	T	G	41833089	5.921	3.2e-09	0.839214	T	G	0.0193264	0.00313263	6.85596e-10	T	G	0.0166898	0.00622057	0.007303	T	G	0.009	0.003	0.0002729
1	4	rs1892423	rs2364544	A	G	41833162	-5.936	2.91e-09	0.839214	A	G	-0.0192843	0.00313267	7.46651e-10	A	G	-0.0163731	0.00622077	0.008499	A	G	-0.009	0.003	0.0003166
1	4	rs1892423	rs11578963	A	G	41834183	6.021	1.73e-09	0.835328	A	G	0.019128	0.00312699	9.53245e-10	A	G	0.0163313	0.00620962	0.008548	A	G	0.009	0.003	0.0004216
1	4	rs1892423	rs61774744	A	G	41834444	-5.921	3.19e-09	0.839214	A	G	-0.0192775	0.0031307	7.38738e-10	A	G	-0.0161427	0.00621589	0.009395	A	G	-0.009	0.003	0.0003397
1	4	rs1892423	rs11581271	C	G	41835061	-5.999	1.99e-09	0.842345	C	G	-0.0187517	0.0030477	7.61631e-10	C	G	-0.0158834	0.00562644	0.004764	C	G	-0.009	0.003	0.0003919
1	4	rs1892423	rs4636447	A	G	41835633	5.941	2.84e-09	0.842345	A	G	0.0191367	0.00312756	9.43204e-10	A	G	0.0156606	0.00621451	0.01174	A	G	0.009	0.003	0.0003037
1	4	rs1892423	rs7522116	C	T	41835685	NA	NA	0.742243	T	C	0.0151767	0.00447476	0.000694796	T	C	0.0125128	0.00613372	0.04133	T	C	0.01	0.003	0.000117
1	4	rs1892423	rs10889949	T	G	41836026	5.907	3.49e-09	0.837781	T	G	0.0189801	0.00312828	1.30118e-09	T	G	0.015611	0.00621456	0.012	T	G	0.009	0.003	0.0003928
1	4	rs10218712	rs6683382	A	T	41836787	5.656	1.55e-08	0.915483	A	T	0.0190077	0.00328618	7.28935e-09	A	T	0.0238719	0.00652416	0.0002531	A	T	0.007	0.003	0.00526
1	4	rs1892423	rs4660192	T	C	41842350	5.7	1.2e-08	0.879174	T	C	0.0177075	0.00291935	1.31498e-09	T	C	0.0101469	0.00506334	0.04503	T	C	0.009	0.002	0.0001849
1	4	rs1892423	rs60144015	A	C	41845246	5.705	1.16e-08	0.885465	A	C	0.0195296	0.00307031	2.00723e-10	A	C	0.0145946	0.00609124	0.01657	A	C	0.009	0.002	0.0001927
1	4	rs1892423	rs61774752	T	C	41847024	-5.781	7.43e-09	0.881726	T	C	-0.0196384	0.0030703	1.59255e-10	T	C	-0.0144727	0.00609122	0.01749	T	C	-0.009	0.002	0.0002117
1	4	rs1892423	rs4359027	A	G	41848296	5.644	1.67e-08	0.889218	A	G	0.0194144	0.00307012	2.55456e-10	A	G	0.014375	0.00609108	0.01826	A	G	0.009	0.002	0.0002477
1	4	rs1892423	rs1892423	A	C	41849340	-6.036	1.58e-09	1	A	C	-0.018364	0.00309036	2.80986e-09	A	C	-0.0173393	0.00613347	0.004694	A	C	-0.009	0.003	0.0005167
1	4	rs1892423	rs10889959	T	C	41849735	-5.981	2.22e-09	1	T	C	-0.0173206	0.00293844	3.7589e-09	T	C	-0.01441	0.00509909	0.004714	T	C	-0.009	0.003	0.0005014
1	4	rs1892423	rs10749805	A	G	41850182	6.031	1.63e-09	0.987525	A	G	0.0183157	0.00301312	1.21214e-09	A	G	0.0173873	0.00555861	0.001762	A	G	0.009	0.003	0.0005181
1	4	rs1892423	rs11209976	T	C	41851415	5.828	5.61e-09	0.872796	T	C	0.0206467	0.00307073	1.77152e-11	T	C	0.0203255	0.00608546	0.0008368	T	C	0.009	0.002	0.0003885
1	5	rs2782653	rs2992038	T	C	43949718	5.238	1.62e-07	0.600769	T	C	0.0147347	0.00318255	3.65969e-06	T	C	0.0111788	0.00626264	0.07432	T	C	0.013	0.003	5.948e-07
1	5	rs2782653	rs2992037	A	G	43949810	5.281	1.29e-07	0.725392	A	G	0.0165021	0.0033044	5.91455e-07	A	G	0.0138968	0.00650294	0.03256	A	G	0.015	0.003	2.495e-08
1	5	rs2782653	rs2782653	C	G	43950265	5.532	3.17e-08	1	C	G	0.0184556	0.00341681	6.61164e-08	C	G	0.015408	0.00678768	0.02323	C	G	0.016	0.003	5.681e-09
1	5	rs2819336	rs34898652	A	G	43974091	5.78	7.49e-09	0.793577	A	G	0.0169963	0.00317591	8.717e-08	A	G	0.0101901	0.00626314	0.1038	A	G	0.016	0.003	9.716e-11
1	5	rs2819336	rs11210860	A	G	43982527	5.676	1.38e-08	0.804758	A	G	0.0169807	0.00301853	1.84998e-08	A	G	0.0123963	0.00520632	0.01725	A	G	0.016	0.003	9.729e-11
1	5	rs2819336	rs2152113	T	C	43983569	5.705	1.16e-08	0.808945	T	C	0.016909	0.00301779	2.10518e-08	T	C	0.0125515	0.00520593	0.01591	T	C	0.016	0.003	1.353e-10
1	5	rs2819336	rs11577403	A	G	43989773	5.562	2.67e-08	0.817169	A	G	0.0166926	0.00313017	9.66989e-08	A	G	0.0112312	0.00591428	0.05753	A	G	0.016	0.003	1.814e-10
1	5	rs2819336	rs2842189	T	C	44007648	6.337	2.34e-10	0.925556	T	C	0.0176382	0.00316351	2.46821e-08	T	C	0.0136907	0.00610374	0.02488	T	C	0.016	0.003	1.396e-10
1	5	rs2819336	rs2782640	T	C	44009033	-6.26	3.84e-10	0.901948	T	C	-0.0179969	0.00301679	2.43798e-09	T	C	-0.0161271	0.00521745	0.001998	T	C	-0.016	0.003	4.321e-10
1	5	rs58859557	rs58859557	T	C	44010456	5.503	3.74e-08	1	T	C	0.023152	0.00597168	0.000105768	T	C	0.00840103	0.0119503	0.4823	T	C	0.018	0.005	0.0007599
1	5	rs58859557	rs6695915	A	G	44010571	-5.037	4.74e-07	0.672477	A	G	-0.0266787	0.00502543	1.10385e-07	A	G	-0.0178354	0.00947178	0.05965	A	G	-0.02	0.005	2.908e-05
1	5	rs2819336	rs951740	A	G	44011737	-6.273	3.54e-10	0.912441	A	G	-0.0175704	0.00317407	3.10137e-08	A	G	-0.0128009	0.00627801	0.04148	A	G	-0.016	0.003	5.725e-10
1	5	rs2819336	rs2782641	A	G	44013355	-5.929	3.05e-09	0.893689	A	G	-0.0173265	0.00300479	8.10286e-09	A	G	-0.0157083	0.00519281	0.002485	A	G	-0.016	0.003	7.406e-10
1	5	rs2819336	rs2842188	T	C	44014280	6.608	3.9e-11	0.972945	T	C	0.0193803	0.00303995	1.82711e-10	T	C	0.0182993	0.00524185	0.0004816	T	C	0.016	0.003	4.554e-10
1	5	rs2819336	rs2819333	A	T	44014573	6.612	3.8e-11	0.956245	A	T	0.0191701	0.00303107	2.53987e-10	A	T	0.0178301	0.00523643	0.0006618	A	T	0.016	0.003	6.325e-10
1	5	rs2819336	rs2819334	T	C	44014735	-6.583	4.61e-11	0.940338	T	C	-0.0190686	0.00302901	3.06726e-10	T	C	-0.0176364	0.00523803	0.0007604	T	C	-0.016	0.003	5.199e-10
1	5	rs2819336	rs2819335	A	G	44014825	6.614	3.75e-11	0.973447	A	G	0.018684	0.00319084	4.75586e-09	A	G	0.0151936	0.0063018	0.01592	A	G	0.016	0.003	5.763e-10
1	5	rs2819336	rs2842187	T	C	44014949	6.639	3.16e-11	0.977672	T	C	0.0192791	0.00303963	2.25955e-10	T	C	0.0179652	0.0052392	0.0006063	T	C	0.016	0.003	2.626e-10
1	5	rs2819336	rs2819336	T	C	44015809	7.077	1.48e-12	1	T	C	0.0201219	0.00321113	3.69719e-10	T	C	0.0175993	0.00633295	0.005452	T	C	0.017	0.003	6.117e-11
1	5	rs2819336	rs11580258	A	G	44016015	6.631	3.33e-11	0.977672	A	G	0.0188342	0.00319668	3.82036e-09	A	G	0.0153004	0.00630423	0.01524	A	G	0.016	0.003	2.928e-10
1	5	rs11210871	rs2819339	T	G	44018604	-4.322	1.55e-05	0.670877	T	G	-0.0202824	0.00350038	6.85889e-09	T	G	-0.0167057	0.00611034	0.006256	T	G	-0.018	0.003	2.772e-09
1	5	rs2819336	rs2842185	T	C	44019731	-6.592	4.35e-11	0.977672	T	C	-0.0193567	0.00303952	1.91084e-10	T	C	-0.018125	0.00523996	0.0005431	T	C	-0.016	0.003	3.015e-10
1	5	rs11210871	rs2842183	T	C	44020394	4.378	1.2e-05	0.673718	T	C	0.0200893	0.00366291	4.14596e-08	T	C	0.0144877	0.00734298	0.04855	T	C	0.018	0.003	2.983e-09
1	5	rs11210871	rs2842181	T	C	44020528	NA	NA	0.673718	NA	NA	NA	NA	NA	T	C	-0.0146512	0.00734026	0.04592	NA	NA	NA	NA	NA
1	5	rs11210871	rs10890253	C	G	44021456	-4.384	1.17e-05	0.673718	C	G	-0.0201554	0.00366143	3.69639e-08	C	G	-0.0142205	0.0073415	0.05268	C	G	-0.018	0.003	2.665e-09
1	5	rs2819336	rs2842178	A	G	44022027	6.486	8.8e-11	0.977672	A	G	0.0189146	0.0031966	3.27648e-09	A	G	0.0155953	0.00630367	0.01336	A	G	0.016	0.003	6.735e-10
1	5	rs11210871	rs2494995	A	C	44022303	4.45	8.6e-06	0.673718	A	C	0.0200318	0.00365299	4.1658e-08	A	C	0.0142917	0.00734039	0.05155	A	C	0.018	0.003	1.838e-09
1	5	rs11210871	rs2842176	T	C	44022534	-4.363	1.29e-05	0.673718	T	C	-0.020047	0.00366366	4.4534e-08	T	C	-0.0141861	0.00734269	0.0534	T	C	-0.018	0.003	3.371e-09
1	5	rs11210871	rs2842175	A	G	44023615	-4.426	9.59e-06	0.670877	A	G	-0.0201694	0.00367298	3.99051e-08	A	G	-0.0142102	0.00734377	0.05298	A	G	-0.018	0.003	2.185e-09
1	5	rs11210871	rs11580074	A	G	44024484	-4.41	1.03e-05	0.670877	A	G	-0.02028	0.00349322	6.41613e-09	A	G	-0.016602	0.00609917	0.006484	A	G	-0.018	0.003	3.126e-09
1	5	rs2819336	rs11210869	A	G	44026040	-6.663	2.69e-11	0.977672	A	G	-0.0194514	0.00303881	1.54389e-10	A	G	-0.0181654	0.00523953	0.0005254	A	G	-0.016	0.003	2.705e-10
1	5	rs11210871	rs10789435	T	G	44026053	-4.456	8.35e-06	0.684839	T	G	-0.020056	0.00365853	4.20575e-08	T	G	-0.0143061	0.00734021	0.05128	T	G	-0.018	0.003	3.235e-09
1	5	rs11210871	rs3000761	T	C	44026089	-4.451	8.55e-06	0.684839	T	C	-0.0200048	0.00365876	4.5607e-08	T	C	-0.0141337	0.00734219	0.05423	T	C	-0.018	0.003	2.495e-09
1	5	rs11210871	rs68191270	A	C	44026180	-4.446	8.77e-06	0.684839	A	C	-0.0200387	0.00365876	4.32786e-08	A	C	-0.0142903	0.00733967	0.05151	A	C	-0.018	0.003	2.335e-09
1	5	rs11210871	rs12076635	C	G	44026656	4.487	7.21e-06	0.687721	C	G	0.0199823	0.00364116	4.06752e-08	C	G	0.0146482	0.00733876	0.04588	C	G	0.018	0.003	1.648e-09
1	5	rs2819336	rs61769611	A	G	44028913	6.663	2.68e-11	0.977672	A	G	0.0189932	0.00319529	2.77949e-09	A	G	0.0152706	0.00630236	0.01541	A	G	0.016	0.003	2.466e-10
1	5	rs11210871	rs2842194	A	G	44028962	-4.363	1.28e-05	0.711028	A	G	-0.0200573	0.00365989	4.24608e-08	A	G	-0.0149502	0.00725384	0.03934	A	G	-0.018	0.003	2.737e-09
1	5	rs11210871	rs11210871	C	G	44029353	-5.89	3.87e-09	1	C	G	-0.0196877	0.00314969	4.08666e-10	C	G	-0.0178477	0.00551196	0.001203	C	G	-0.016	0.003	6.835e-09
1	5	rs11210871	rs10890255	A	G	44031493	-4.465	8.02e-06	0.707414	A	G	-0.0194182	0.00362921	8.76879e-08	A	G	-0.0148028	0.00724915	0.04118	A	G	-0.017	0.003	6.04e-09
1	5	rs11210871	rs2478978	T	C	44031657	-4.31	1.63e-05	0.711028	T	C	-0.0199774	0.00366223	4.89788e-08	T	C	-0.0147659	0.00726311	0.04209	T	C	-0.018	0.003	3.889e-09
1	5	rs2819336	rs11586016	C	G	44031793	6.43	1.27e-10	0.956245	C	G	0.018942	0.00318397	2.69485e-09	C	G	0.0149823	0.00630038	0.01739	C	G	0.016	0.003	3.784e-10
1	5	rs11210871	rs12089622	A	C	44033768	3.951	7.78e-05	0.713953	A	C	0.0174453	0.0036259	1.49958e-06	A	C	0.0148407	0.00724999	0.04069	A	C	0.013	0.003	7.266e-06
1	5	rs2819336	rs4660736	A	C	44034901	NA	NA	0.907263	A	C	0.0217825	0.00455241	1.71122e-06	A	C	0.016199	0.00623999	0.009423	A	C	0.015	0.003	3.282e-09
1	5	rs11210871	rs2842186	A	G	44035093	4.363	1.28e-05	0.677882	A	G	0.0207429	0.00350648	3.30696e-09	A	G	0.0181924	0.00608034	0.002773	A	G	0.017	0.003	9.459e-09
1	5	rs2819336	rs943513	A	G	44035472	6.412	1.44e-10	0.93586	A	G	0.0191515	0.00317459	1.61203e-09	A	G	0.0150105	0.00627793	0.01681	A	G	0.016	0.003	9.096e-10
1	5	rs2819336	rs1887402	A	G	44036085	6.474	9.55e-11	0.95247	A	G	0.0196683	0.00302162	7.55583e-11	A	G	0.0176299	0.00521905	0.0007303	A	G	0.016	0.003	6.709e-10
1	5	rs11210871	rs3001723	A	G	44037685	-5.685	1.31e-08	0.906438	A	G	-0.0196243	0.00314725	4.50706e-10	A	G	-0.017196	0.0054992	0.001764	A	G	-0.015	0.003	8.441e-08
1	5	rs11210871	rs2819340	T	C	44039710	-4.307	1.66e-05	0.654235	T	C	-0.0200528	0.00367775	4.96815e-08	T	C	-0.0146081	0.00735554	0.04706	T	C	-0.018	0.003	5.868e-09
1	5	rs2819336	rs2842171	A	G	44039850	-6.452	1.1e-10	0.939632	A	G	-0.019125	0.00317954	1.7987e-09	A	G	-0.0151533	0.00627985	0.01582	A	G	-0.016	0.003	8.035e-10
1	5	rs11210871	rs10789436	T	G	44040966	-4.302	1.7e-05	0.657828	T	G	-0.0210327	0.00353248	2.61531e-09	T	G	-0.0192807	0.00611505	0.001618	T	G	-0.018	0.003	4.169e-09
1	5	rs58859557	rs45605334	T	C	44041744	4.79	1.67e-06	0.815616	T	C	0.0261893	0.00567529	3.93794e-06	T	C	0.00740612	0.0113243	0.5133	T	C	0.018	0.005	0.0002378
1	5	rs11210871	rs650729	C	G	44042539	-4.27	1.96e-05	0.657828	C	G	-0.0209326	0.00351618	2.62908e-09	C	G	-0.019363	0.00611592	0.001548	C	G	-0.018	0.003	6.012e-09
1	5	rs11210871	rs663618	T	C	44043105	-4.367	1.26e-05	0.657828	T	C	-0.0203121	0.00369615	3.89624e-08	T	C	-0.0157144	0.00735691	0.03269	T	C	-0.018	0.003	4.462e-09
1	5	rs2819336	rs552638	A	G	44043392	6.457	1.07e-10	0.9433	A	G	0.0192229	0.0031771	1.44429e-09	A	G	0.0156801	0.00627958	0.01252	A	G	0.016	0.003	3.317e-10
1	5	rs11210871	rs2004899	A	G	44045465	-4.332	1.48e-05	0.660511	A	G	-0.0206183	0.00348299	3.22467e-09	A	G	-0.0192336	0.00611367	0.001653	A	G	-0.018	0.003	3.745e-09
1	5	rs2819336	rs1808730	A	G	44045528	6.373	1.85e-10	0.935393	A	G	0.019133	0.00317954	1.77079e-09	A	G	0.015477	0.0062787	0.01371	A	G	0.016	0.003	1.839e-10
1	5	rs2819336	rs3791134	A	G	44049156	6.391	1.65e-10	0.935393	A	G	0.0191312	0.00310143	6.89317e-10	A	G	0.0162443	0.00569177	0.004317	A	G	0.016	0.003	3.921e-10
1	5	rs2819336	rs3791136	T	C	44049947	6.437	1.22e-10	0.947768	T	C	0.0194557	0.0030273	1.30369e-10	T	C	0.0177716	0.00522079	0.000665	T	C	0.016	0.003	3.108e-10
1	5	rs11210871	rs3791137	A	G	44050004	4.308	1.64e-05	0.660511	A	G	0.0205148	0.00349234	4.24854e-09	A	G	0.0188395	0.00611276	0.002055	A	G	0.018	0.003	4.498e-09
1	5	rs11210871	rs3791138	A	C	44050027	-4.191	2.78e-05	0.660511	A	C	-0.0200054	0.00367304	5.13595e-08	A	C	-0.0157195	0.00735587	0.03257	A	C	-0.018	0.003	2.927e-09
1	5	rs11210871	rs3828150	T	C	44050856	-4.303	1.69e-05	0.657828	T	C	-0.0206631	0.00351448	4.11706e-09	T	C	-0.0188939	0.00611649	0.00201	T	C	-0.018	0.003	5.136e-09
1	5	rs2819336	rs6698389	A	G	44051574	-6.433	1.26e-10	0.947618	A	G	-0.0191552	0.00318323	1.77079e-09	A	G	-0.0157917	0.00628149	0.01194	A	G	-0.016	0.003	2.669e-10
1	5	rs2819336	rs61769642	A	G	44051630	6.421	1.35e-10	0.930926	A	G	0.0190652	0.00317851	1.99596e-09	A	G	0.0153755	0.00627826	0.01432	A	G	0.016	0.003	3.162e-10
1	5	rs2819336	rs3791139	T	C	44051771	-6.403	1.52e-10	0.935393	T	C	-0.0191418	0.003181	1.77079e-09	T	C	-0.0159051	0.00628412	0.01136	T	C	-0.016	0.003	2.86e-10
1	5	rs2819336	rs3791140	A	G	44051778	6.426	1.31e-10	0.947618	A	G	0.0191263	0.00318467	1.90471e-09	A	G	0.0159779	0.00628556	0.01101	A	G	0.016	0.003	2.567e-10
1	5	rs2819336	rs501299	A	C	44051834	-6.43	1.28e-10	0.947618	A	C	-0.0194681	0.00302681	1.26026e-10	A	C	-0.0178756	0.00522068	0.0006168	A	C	-0.016	0.003	2.67e-10
1	5	rs2819336	rs61769643	A	G	44052198	3.949	7.83e-05	0.658942	A	G	0.0131134	0.0033905	0.000109874	A	G	0.0140493	0.00665213	0.03465	A	G	0.013	0.003	3.853e-06
1	5	rs11210871	rs10890261	T	G	44052377	-4.33	1.49e-05	0.660511	T	G	-0.0200368	0.00367426	4.94462e-08	T	G	-0.0157747	0.00735419	0.03197	T	G	-0.018	0.003	6.59e-09
1	5	rs2819336	rs58097944	A	G	44054994	4.522	6.14e-06	0.675009	A	G	0.0178881	0.00307743	6.14883e-09	A	G	0.0115655	0.00610314	0.05803	A	G	0.015	0.002	3.346e-09
1	5	rs11210871	rs573350	T	C	44057950	-4.272	1.94e-05	0.663214	T	C	-0.0199833	0.00367583	5.43647e-08	T	C	-0.0157598	0.00735409	0.03214	T	C	-0.018	0.003	3.83e-09
1	5	rs2819336	rs605709	T	C	44058467	6.392	1.64e-10	0.939002	T	C	0.0194764	0.00302688	1.23905e-10	T	C	0.0179029	0.00521949	0.0006031	T	C	0.016	0.003	3.092e-10
1	5	rs2819336	rs72673082	A	G	44059242	6.387	1.7e-10	0.9433	A	G	0.0190132	0.00318375	2.34405e-09	A	G	0.0152526	0.00628456	0.01524	A	G	0.016	0.003	3.357e-10
1	5	rs2819336	rs583040	A	G	44060483	6.382	1.75e-10	0.9433	A	G	0.0192836	0.00318358	1.38498e-09	A	G	0.0163796	0.0062781	0.00909	A	G	0.016	0.003	2.925e-10
1	5	rs11210871	rs674725	T	C	44061795	4.15	3.33e-05	0.657828	T	C	0.0200372	0.00371632	6.9803e-08	T	C	0.0153629	0.00735771	0.03681	T	C	0.018	0.003	7.432e-09
1	5	rs2819336	rs673253	T	C	44062154	6.431	1.27e-10	0.742704	T	C	0.019606	0.00294793	2.91572e-11	T	C	0.0129959	0.00509043	0.01068	T	C	0.015	0.002	8.275e-10
1	5	rs2819336	rs673242	T	C	44062159	6.363	1.98e-10	0.9433	T	C	0.0190138	0.0031843	2.35621e-09	T	C	0.015084	0.0062824	0.01635	T	C	0.016	0.003	4.056e-10
1	5	rs2819336	rs56175694	T	C	44065148	6.34	2.3e-10	0.9433	T	C	0.0190657	0.00318352	2.11329e-09	T	C	0.0157827	0.00628044	0.01196	T	C	0.016	0.003	4.577e-10
1	5	rs2819336	rs596522	A	C	44066424	6.335	2.38e-10	0.9433	A	C	0.0191771	0.00316126	1.30907e-09	A	C	0.0165592	0.00610141	0.00664	A	C	0.016	0.003	5.503e-10
1	5	rs2819336	rs492929	A	G	44068275	3.94	8.14e-05	0.653963	A	G	0.0126352	0.00339252	0.000195757	A	G	0.0139851	0.00665325	0.03553	A	G	0.012	0.003	8.934e-06
1	5	rs2819336	rs17371903	A	G	44070691	-6.268	3.66e-10	0.934026	A	G	-0.0189006	0.00302411	4.10522e-10	A	G	-0.0185412	0.00521993	0.0003822	A	G	-0.015	0.003	1.39e-09
1	5	rs11210871	rs631248	A	G	44071221	3.969	7.22e-05	0.639894	A	G	0.0205391	0.00346156	2.96593e-09	A	G	0.0210387	0.00608055	0.0005393	A	G	0.018	0.003	6.734e-09
1	5	rs11210871	rs539096	A	G	44072420	-4.253	2.11e-05	0.609761	A	G	-0.0201744	0.0035066	8.7533e-09	A	G	-0.0197061	0.00607088	0.001169	A	G	-0.017	0.003	1.674e-08
1	5	rs11210871	rs519669	C	G	44075505	4.216	2.49e-05	0.617381	C	G	0.0200335	0.00369137	5.72687e-08	C	G	0.0170543	0.0072944	0.0194	C	G	0.018	0.003	4.742e-09
1	5	rs11210871	rs11210887	A	G	44076019	5.857	4.71e-09	0.856926	A	G	0.0194788	0.00313468	5.16612e-10	A	G	0.0189486	0.00549872	0.0005688	A	G	0.015	0.003	4.356e-08
1	5	rs11210871	rs549845	A	G	44076469	5.874	4.27e-09	0.856926	A	G	0.0192927	0.00330133	5.099e-09	A	G	0.01764	0.00661418	0.007656	A	G	0.015	0.003	5.775e-08
1	5	rs11210871	rs499257	T	C	44078384	-5.278	1.31e-07	0.759658	T	C	-0.017039	0.00307991	3.16061e-08	T	C	-0.0167042	0.00537978	0.0019	T	C	-0.013	0.003	7.718e-07
1	5	rs2819336	rs3791151	A	C	44078602	6.137	8.42e-10	0.758351	A	C	0.0175518	0.00324023	6.06624e-08	A	C	0.0153027	0.00639479	0.01673	A	C	0.015	0.003	3.856e-09
1	5	rs11210871	rs603542	T	C	44079411	-5.295	1.19e-07	0.75557	T	C	-0.0166357	0.00324049	2.84094e-07	T	C	-0.0146886	0.00647361	0.02326	T	C	-0.013	0.003	6.134e-07
1	5	rs2819336	rs55684236	A	G	44080009	6.154	7.55e-10	0.758351	A	G	0.0175819	0.00324023	5.75917e-08	A	G	0.0154	0.00639534	0.01606	A	G	0.015	0.003	3.384e-09
1	5	rs11210871	rs653953	A	G	44083015	5.197	2.03e-07	0.728003	A	G	0.0166366	0.00326211	3.39754e-07	A	G	0.0140054	0.00647499	0.03055	A	G	0.013	0.003	8.305e-07
1	5	rs11210871	rs1143702	T	C	44086831	5.055	4.3e-07	0.728003	T	C	0.0164365	0.00325683	4.49339e-07	T	C	0.0135932	0.00647297	0.03569	T	C	0.013	0.003	8.735e-07
1	5	rs2819336	rs12405972	T	G	44097438	6.1	1.06e-09	0.751333	T	G	0.0177795	0.00324199	4.15507e-08	T	G	0.0148057	0.00639833	0.02069	T	G	0.016	0.003	2.019e-09
1	5	rs11210871	rs2970610	T	C	44097530	-5.184	2.17e-07	0.75557	T	C	-0.0163972	0.0032393	4.1496e-07	T	C	-0.0138082	0.00647055	0.03282	T	C	-0.013	0.003	7.181e-07
1	5	rs2819336	rs61769649	A	G	44098506	6.1	1.06e-09	0.751333	A	G	0.0173601	0.00324222	8.585e-08	A	G	0.0147802	0.00639833	0.02087	A	G	0.015	0.003	3.128e-09
1	5	rs11210871	rs11210892	A	G	44100084	5.121	3.04e-07	0.75557	A	G	0.0168656	0.00307675	4.21432e-08	A	G	0.016344	0.00537986	0.002378	A	G	0.013	0.003	6.047e-07
1	5	rs2819336	rs35393217	A	G	44101648	6.018	1.77e-09	0.751333	A	G	0.0173779	0.00324196	8.30891e-08	A	G	0.0148115	0.00639804	0.02063	A	G	0.015	0.003	8.1e-09
1	5	rs2819336	rs35290231	A	G	44103033	6.055	1.41e-09	0.751333	A	G	0.0173674	0.00324206	8.4656e-08	A	G	0.0148055	0.00639823	0.02066	A	G	0.015	0.003	1.055e-08
1	5	rs11210871	rs2367724	T	C	44107428	4.851	1.23e-06	0.718255	T	C	0.0151222	0.00325821	3.46297e-06	T	C	0.0134087	0.00646515	0.03807	T	C	0.011	0.003	2.697e-05
1	5	rs11210871	rs607296	A	G	44109749	-4.965	6.87e-07	0.715904	A	G	-0.0145429	0.00372698	9.53787e-05	NA	NA	NA	NA	NA	A	G	-0.009	0.003	0.004543
1	5	rs2819336	rs55666439	T	G	44111212	-6.135	8.51e-10	0.751333	T	G	-0.0174025	0.00324196	7.96654e-08	T	G	-0.0148501	0.00639813	0.0203	T	G	-0.015	0.003	3.053e-09
1	5	rs2819336	rs61768370	A	T	44111963	-6.114	9.71e-10	0.751333	A	T	-0.0174179	0.00324177	7.74593e-08	A	T	-0.014824	0.00639795	0.02052	A	T	-0.015	0.003	3.563e-09
1	5	rs2819336	rs517191	A	G	44116466	6.011	1.84e-09	0.751333	A	G	0.0172299	0.00323627	1.01512e-07	A	G	0.0147153	0.00639797	0.02143	A	G	0.015	0.003	4.482e-09
1	5	rs2819336	rs660899	T	G	44117006	6.052	1.43e-09	0.742447	T	G	0.0175103	0.00307736	1.27024e-08	T	G	0.0167486	0.00531869	0.001636	T	G	0.015	0.003	5.524e-09
1	5	rs2819336	rs61768371	A	G	44118406	6.024	1.7e-09	0.751333	A	G	0.0176046	0.00324203	5.63181e-08	A	G	0.0143439	0.00639779	0.02494	A	G	0.016	0.003	1.297e-09
1	5	rs58859557	rs112476957	T	C	44118644	4.879	1.07e-06	0.704114	T	C	0.0242679	0.00548699	9.74267e-06	T	C	0.00729686	0.0112087	0.5149	T	C	0.016	0.005	0.000751
1	5	rs2819336	rs2274465	C	G	44121557	-6.051	1.44e-09	0.751333	C	G	-0.0176968	0.00308178	9.33392e-09	C	G	-0.0168463	0.00531933	0.001538	C	G	-0.015	0.003	3.793e-09
1	5	rs2819336	rs11589584	T	G	44122473	-6.05	1.45e-09	0.751333	T	G	-0.0172915	0.00324168	9.60068e-08	T	G	-0.0146661	0.00639883	0.02193	T	G	-0.015	0.003	4.072e-09
1	5	rs2819336	rs61768372	T	C	44123988	6.056	1.4e-09	0.751333	T	C	0.0173198	0.00324184	9.16408e-08	T	C	0.0146844	0.00639843	0.02176	T	C	0.015	0.003	4.753e-09
1	5	rs58859557	rs56072551	T	G	44124514	4.828	1.38e-06	0.718655	T	G	0.0246063	0.00559017	1.07403e-05	T	G	0.00709898	0.0111795	0.5256	T	G	0.016	0.005	0.0009089
1	5	rs2819336	rs11590619	C	G	44126709	6.109	1e-09	0.751333	C	G	0.0172577	0.00324201	1.01984e-07	C	G	0.0143672	0.00639677	0.02472	C	G	0.015	0.003	9.227e-09
1	5	rs2819336	rs489319	T	C	44131794	6.558	5.45e-11	0.759869	T	C	0.0188843	0.00318054	2.89511e-09	T	C	0.0173695	0.00587203	0.003098	T	C	0.017	0.003	1.25e-10
1	5	rs2819336	rs618678	T	C	44133299	6.548	5.85e-11	0.749588	T	C	0.0187766	0.00318847	3.88784e-09	T	C	0.0169009	0.00587246	0.003997	T	C	0.017	0.003	1.055e-10
1	5	rs2819336	rs3791033	T	C	44134077	-6.63	3.35e-11	0.767521	T	C	-0.0191573	0.00328316	5.37865e-09	T	C	-0.0176223	0.00648355	0.006567	T	C	-0.017	0.003	1.006e-10
1	5	rs2819336	rs10789442	A	C	44140075	-6.621	3.56e-11	0.756832	A	C	-0.0186763	0.00319251	4.91513e-09	A	C	-0.0174946	0.00585889	0.002824	A	C	-0.016	0.003	7.634e-10
1	5	rs2819336	rs9787076	A	C	44141149	-6.611	3.82e-11	0.767521	A	C	-0.019018	0.00320214	2.8652e-09	A	C	-0.0175111	0.00587424	0.002875	A	C	-0.017	0.003	1.26e-10
1	5	rs2819336	rs3791034	A	G	44145130	-6.527	6.73e-11	0.758942	A	G	-0.0187761	0.00319394	4.13559e-09	A	G	-0.0186831	0.00585676	0.001422	A	G	-0.017	0.003	1.161e-10
1	5	rs2819336	rs4660257	T	C	44148168	-6.73	1.7e-11	0.694682	T	C	-0.0189299	0.00320978	3.68931e-09	T	C	-0.0186775	0.00553734	0.0007426	T	C	-0.017	0.003	2.398e-10
1	5	rs2819336	rs61768374	T	G	44151633	-6.743	1.55e-11	0.694682	T	G	-0.0190417	0.00337162	1.62664e-08	T	G	-0.0187783	0.00665896	0.004807	T	G	-0.017	0.003	3.329e-10
1	5	rs2819336	rs1971342	A	G	44152189	6.772	1.27e-11	0.694682	A	G	0.0190194	0.00337624	1.768e-08	A	G	0.0186107	0.00665858	0.005185	A	G	0.017	0.003	3.39e-10
1	5	rs2819336	rs11805774	A	G	44152715	6.769	1.3e-11	0.694682	A	G	0.0185984	0.00321053	6.91697e-09	A	G	0.0187842	0.00553615	0.0006919	A	G	0.016	0.003	1.403e-09
1	5	rs2819336	rs17401357	C	G	44153619	6.788	1.14e-11	0.694682	C	G	0.0189824	0.00321027	3.35907e-09	C	G	0.0188124	0.00553631	0.0006786	C	G	0.017	0.003	3.305e-10
1	5	rs2819336	rs3791035	C	G	44154479	6.761	1.37e-11	0.694682	C	G	0.0188888	0.0032103	4.00922e-09	C	G	0.0185405	0.00553448	0.0008083	C	G	0.017	0.003	3.232e-10
1	5	rs2819336	rs2270972	C	G	44158129	-6.765	1.33e-11	0.694682	C	G	-0.0185272	0.00328881	1.76676e-08	C	G	-0.0175695	0.00603347	0.003587	C	G	-0.017	0.003	2.864e-10
1	5	rs2819336	rs112984125	A	G	44173423	6.772	1.27e-11	0.669735	A	G	0.0185345	0.00337084	3.83081e-08	A	G	0.0195743	0.00666244	0.003306	A	G	0.016	0.003	2.044e-09
1	5	rs2906455	rs304300	T	G	44174793	-4.71	2.48e-06	0.801872	T	G	-0.0257424	0.00477119	6.83786e-08	T	G	-0.0283201	0.00878689	0.001269	T	G	-0.017	0.004	2.088e-05
1	5	rs2819336	rs17531412	A	G	44182244	-6.755	1.43e-11	0.676489	A	G	-0.019257	0.00337358	1.14189e-08	A	G	-0.0190153	0.006658	0.004292	A	G	-0.018	0.003	7.519e-11
1	5	rs2819336	rs112361411	T	C	44183923	6.76	1.38e-11	0.676489	T	C	0.0188288	0.00337375	2.39189e-08	T	C	0.0189948	0.00666016	0.00435	T	C	0.017	0.003	8.933e-11
1	5	rs2819336	rs11810109	A	T	44186812	-6.807	1e-11	0.676489	A	T	-0.0192318	0.00337765	1.24218e-08	A	T	-0.01866	0.00665951	0.005075	A	T	-0.018	0.003	6.496e-11
1	5	rs2819336	rs12410155	A	C	44188465	-6.716	1.87e-11	0.676489	A	C	-0.0189682	0.00320554	3.27262e-09	A	C	-0.0194846	0.00553698	0.0004339	A	C	-0.017	0.003	1.248e-10
1	5	rs2819336	rs12410444	A	G	44188719	-6.761	1.37e-11	0.676489	A	G	-0.019323	0.00337118	9.93616e-09	A	G	-0.0191621	0.00666043	0.00402	A	G	-0.018	0.003	2.136e-11
1	5	rs11577684	rs6429637	A	G	44198531	-6.892	5.49e-12	0.676863	A	G	-0.0188488	0.00315514	2.31522e-09	A	G	-0.0189599	0.00547184	0.0005294	A	G	-0.017	0.003	4.172e-10
1	5	rs11577684	rs6673970	A	C	44199469	-6.847	7.53e-12	0.676863	A	C	-0.0186172	0.00315585	3.65111e-09	A	C	-0.0183188	0.00546993	0.0008105	A	C	-0.017	0.003	4.208e-10
1	5	rs11577684	rs3791040	A	G	44202733	-6.765	1.33e-11	0.662058	A	G	-0.0187505	0.00314684	2.54517e-09	A	G	-0.0186932	0.00547063	0.0006329	A	G	-0.017	0.003	4.699e-10
1	5	rs11577684	rs1013793	T	C	44207553	6.741	1.57e-11	0.666777	T	C	0.0182627	0.00315211	6.88167e-09	T	C	0.0181715	0.00547498	0.0009042	T	C	0.016	0.003	6.744e-10
1	5	rs11577684	rs1029632	A	C	44207899	6.752	1.45e-11	0.666777	A	C	0.0183228	0.00331503	3.25427e-08	A	C	0.0181573	0.00658588	0.005836	A	C	0.016	0.003	6.788e-10
1	5	rs11577684	rs1472661	T	C	44209075	6.755	1.43e-11	0.666777	T	C	0.0183042	0.00315228	6.37278e-09	T	C	0.0182395	0.00547403	0.0008637	T	C	0.016	0.003	6.708e-10
1	5	rs11577684	rs59305903	T	C	44210191	6.818	9.25e-12	0.666777	T	C	0.0187615	0.00331506	1.51852e-08	T	C	0.0181284	0.00658495	0.005909	T	C	0.017	0.003	4.654e-10
1	5	rs11577684	rs6696529	A	T	44210387	6.736	1.63e-11	0.652695	A	T	0.0187335	0.00332252	1.7168e-08	A	T	0.0180051	0.0066001	0.006371	A	T	0.017	0.003	6.073e-10
1	5	rs11577684	rs112646031	C	G	44213051	-6.83	8.47e-12	0.685466	C	G	-0.0189334	0.00334445	1.50366e-08	C	G	-0.0184088	0.0065934	0.005233	C	G	-0.017	0.003	4.97e-10
1	5	rs11577684	rs7551551	A	C	44213482	6.829	8.54e-12	0.685466	A	C	0.0188515	0.00334445	1.73371e-08	A	C	0.018053	0.00658869	0.006145	A	C	0.017	0.003	6.002e-10
1	5	rs11577684	rs7511800	A	T	44214269	-6.896	5.36e-12	0.693254	A	T	-0.0183602	0.00333966	3.84919e-08	A	T	-0.0179855	0.00658809	0.006324	A	T	-0.016	0.003	2.366e-09
1	5	rs11577684	rs56338811	A	G	44214888	-6.737	1.61e-11	0.666777	A	G	-0.0183165	0.00331289	3.22312e-08	A	G	-0.0181291	0.00658523	0.005913	A	G	-0.016	0.003	8.137e-10
1	5	rs11577684	rs56367078	T	G	44215015	6.755	1.42e-11	0.666777	T	G	0.0183257	0.00331506	3.23866e-08	T	G	0.0181472	0.0065846	0.005848	T	G	0.016	0.003	7.857e-10
1	5	rs11577684	rs56701980	T	C	44215412	-6.736	1.63e-11	0.666777	T	C	-0.0183228	0.00331301	3.19226e-08	T	C	-0.0181269	0.00658443	0.005905	T	C	-0.016	0.003	8.271e-10
1	5	rs11577684	rs12062824	A	G	44215859	-6.743	1.55e-11	0.666777	A	G	-0.0182992	0.00331179	3.28572e-08	A	G	-0.0180615	0.00658217	0.00607	A	G	-0.016	0.003	8.239e-10
1	5	rs11577684	rs6668616	T	C	44216376	-6.742	1.57e-11	0.666777	T	C	-0.0183104	0.00331179	3.22312e-08	T	C	-0.0181268	0.00658439	0.005912	T	C	-0.016	0.003	8.32e-10
1	5	rs11577684	rs11584382	T	C	44216634	6.799	1.05e-11	0.676863	T	C	0.0182863	0.00332162	3.68684e-08	T	C	0.0180357	0.00658717	0.00619	T	C	0.016	0.003	7.247e-10
1	5	rs11577684	rs6700256	A	G	44216887	6.742	1.57e-11	0.666777	A	G	0.018305	0.00331181	3.25427e-08	A	G	0.0181259	0.00658405	0.005899	A	G	0.016	0.003	8.081e-10
1	5	rs11577684	rs6429639	A	G	44217753	6.756	1.42e-11	0.666777	A	G	0.0182643	0.00331509	3.59954e-08	A	G	0.0178677	0.00658352	0.00665	A	G	0.016	0.003	7.451e-10
1	5	rs11577684	rs3791043	T	G	44219546	6.756	1.42e-11	0.666777	T	G	0.018279	0.00315119	6.60554e-09	T	G	0.0181809	0.00547453	0.0008971	T	G	0.016	0.003	7.498e-10
1	5	rs11577684	rs3791044	A	G	44219933	6.847	7.57e-12	0.685466	A	G	0.018448	0.00334381	3.44743e-08	A	G	0.0181494	0.00658781	0.005868	A	G	0.016	0.003	6.49e-10
1	5	rs11577684	rs6678767	A	G	44220670	6.745	1.54e-11	0.666777	A	G	0.0183076	0.00331179	3.23866e-08	A	G	0.0181204	0.00658443	0.005914	A	G	0.016	0.003	8.523e-10
1	5	rs11577684	rs11210912	T	G	44220737	-6.751	1.46e-11	0.666777	T	G	-0.0183188	0.00331179	3.17693e-08	T	G	-0.0181473	0.00659663	0.005935	T	G	-0.016	0.003	9.452e-10
1	5	rs11577684	rs11581514	A	G	44222204	-6.759	1.39e-11	0.666777	A	G	-0.0183621	0.00331506	3.04218e-08	A	G	-0.0181635	0.00658097	0.00578	A	G	-0.016	0.003	7.083e-10
1	5	rs11577684	rs11587515	T	C	44222570	6.821	9.04e-12	0.676863	T	C	0.0183018	0.00332087	3.56519e-08	T	C	0.0184043	0.00658474	0.005195	T	C	0.016	0.003	8.174e-10
1	5	rs11577684	rs11210914	T	C	44223456	-6.767	1.31e-11	0.666777	T	C	-0.018295	0.00331506	3.41448e-08	T	C	-0.0179089	0.00659144	0.006594	T	C	-0.016	0.003	1.202e-09
1	5	rs11577684	rs112518613	T	C	44224985	-6.736	1.63e-11	0.666777	T	C	-0.0183188	0.00331179	3.17693e-08	T	C	-0.0181671	0.00658468	0.005789	T	C	-0.016	0.003	9.029e-10
1	5	rs11577684	rs6664485	T	C	44225532	-6.747	1.51e-11	0.666777	T	C	-0.0182192	0.00314927	7.24267e-09	T	C	-0.0180612	0.0054764	0.0009745	T	C	-0.016	0.003	6.645e-10
1	5	rs11577684	rs7520053	A	G	44226657	-6.825	8.77e-12	0.673229	A	G	-0.0183198	0.00315775	6.57169e-09	A	G	-0.0183169	0.00547428	0.0008186	A	G	-0.016	0.003	7.884e-10
1	5	rs11577684	rs7551644	A	T	44228016	-6.778	1.22e-11	0.663294	A	T	-0.0184393	0.0031513	4.87663e-09	A	T	-0.0185598	0.00547324	0.0006973	A	T	-0.016	0.003	7.427e-10
1	5	rs11577684	rs56352978	A	G	44231480	NA	NA	0.681307	A	G	0.0240555	0.00484831	6.99077e-07	A	G	0.0169529	0.00664561	0.01075	A	G	0.016	0.003	2.679e-09
1	5	rs11577684	rs56009633	C	T	44231481	NA	NA	0.683038	T	C	-0.0241191	0.00484267	6.34097e-07	T	C	-0.0171257	0.00663787	0.009894	T	C	-0.016	0.003	3.419e-09
1	5	rs11577684	rs3791046	A	C	44231807	6.713	1.91e-11	0.676863	A	C	0.0182803	0.00315236	6.67364e-09	A	C	0.0182292	0.00547259	0.0008648	A	C	0.016	0.003	6.943e-10
1	5	rs11577684	rs11210916	A	G	44232926	6.701	2.07e-11	0.676863	A	G	0.0182872	0.00331518	3.46402e-08	A	G	0.018155	0.00658507	0.00584	A	G	0.016	0.003	6.96e-10
1	5	rs11577684	rs6656457	C	G	44233662	6.719	1.83e-11	0.666777	C	G	0.0182714	0.00315035	6.63946e-09	C	G	0.0181271	0.00547482	0.0009293	C	G	0.016	0.003	6.637e-10
1	5	rs11577684	rs4660745	T	C	44234076	6.665	2.64e-11	0.666777	T	C	0.0182743	0.00331436	3.51425e-08	T	C	0.0181763	0.0065856	0.00578	T	C	0.016	0.003	6.94e-10
1	5	rs11577684	rs11210917	A	T	44234520	6.667	2.6e-11	0.666777	A	T	0.018199	0.00315047	7.62205e-09	A	T	0.0180988	0.00547452	0.0009447	A	T	0.016	0.003	6.914e-10
1	5	rs11577684	rs3791047	A	G	44236114	-6.698	2.11e-11	0.675126	A	G	-0.0188922	0.00316651	2.42754e-09	A	G	-0.0187525	0.00547519	0.0006148	A	G	-0.017	0.003	6.075e-10
1	5	rs11577684	rs7531165	T	C	44237247	6.689	2.25e-11	0.675126	T	C	0.018486	0.00333134	2.87111e-08	T	C	0.018581	0.00658666	0.004786	T	C	0.016	0.003	6.961e-10
1	5	rs11577684	rs7516647	T	C	44237465	6.733	1.66e-11	0.685466	T	C	0.0189823	0.00317932	2.3645e-09	T	C	0.0189336	0.0054769	0.0005454	T	C	0.017	0.003	5.635e-10
1	5	rs11577684	rs10890280	A	G	44238218	-6.658	2.77e-11	0.675126	A	G	-0.0184836	0.00333141	2.88501e-08	A	G	-0.0186079	0.00658685	0.004724	A	G	-0.016	0.003	7.245e-10
1	5	rs11577684	rs7529895	T	C	44241870	6.696	2.15e-11	0.690378	T	C	0.0187757	0.00334502	1.98806e-08	T	C	0.0179128	0.00659771	0.00662	T	C	0.017	0.003	5.742e-10
1	5	rs11577684	rs61768432	A	T	44243561	-6.665	2.64e-11	0.679939	A	T	-0.0183607	0.00333822	3.79432e-08	A	T	-0.0179684	0.00659389	0.006425	A	T	-0.016	0.003	7.018e-10
1	5	rs11577684	rs55695044	T	C	44243658	6.667	2.61e-11	0.679939	T	C	0.0183542	0.00333703	3.79432e-08	T	C	0.0179885	0.00659403	0.006377	T	C	0.016	0.003	6.998e-10
1	5	rs11577684	rs11590279	T	C	44244183	6.696	2.14e-11	0.690378	T	C	0.0181781	0.00334505	5.50015e-08	T	C	0.0173739	0.006596	0.008449	T	C	0.016	0.003	6.949e-10
1	5	rs11577684	rs2158954	A	G	44244667	6.668	2.6e-11	0.679939	A	G	0.0183584	0.00333831	3.81252e-08	A	G	0.0179951	0.00659404	0.00636	A	G	0.016	0.003	7.165e-10
1	5	rs11577684	rs12083110	T	C	44245049	-6.671	2.55e-11	0.679939	T	C	-0.0184148	0.00333831	3.46402e-08	T	C	-0.0182282	0.00659247	0.005686	T	C	-0.016	0.003	7.495e-10
1	5	rs11577684	rs10890281	A	C	44245939	6.638	3.18e-11	0.679939	A	C	0.0182801	0.00317442	8.48269e-09	A	C	0.0180004	0.00547957	0.00102	A	C	0.016	0.003	8.342e-10
1	5	rs2906455	rs6680338	A	G	44246356	5.188	2.13e-07	0.907792	A	G	0.0331127	0.00508157	7.20889e-11	A	G	0.0352232	0.0101013	0.0004893	A	G	0.022	0.004	1.618e-07
1	5	rs11577684	rs12354267	T	C	44248272	-6.496	8.25e-11	0.68417	T	C	-0.0176191	0.00325128	5.98963e-08	T	C	-0.0167152	0.00596757	0.005089	T	C	-0.016	0.003	9.831e-10
1	5	rs11577684	rs12760274	A	G	44249344	-4.48	7.46e-06	0.781471	A	G	-0.0138838	0.00314929	1.04065e-05	A	G	-0.0183685	0.00541047	0.0006865	A	G	-0.01	0.003	0.0001918
1	5	rs2906455	rs917293	A	G	44249916	5.555	2.78e-08	0.910336	A	G	0.0334257	0.00495814	1.56655e-11	A	G	0.0359267	0.0101202	0.0003858	A	G	0.022	0.004	1.095e-07
1	5	rs2906455	rs4660749	T	G	44250301	-5.567	2.59e-08	0.929226	T	G	-0.034526	0.00495855	3.33291e-12	T	G	-0.0362731	0.0091391	7.215e-05	T	G	-0.022	0.004	1.98e-07
1	5	rs2906455	rs4660750	T	C	44250381	-5.572	2.52e-08	0.929226	T	C	-0.0345289	0.00505395	8.36983e-12	T	C	-0.036364	0.00979635	0.0002054	T	C	-0.022	0.004	1.808e-07
1	5	rs11577684	rs35025013	T	G	44250787	NA	NA	0.726567	NA	NA	NA	NA	NA	NA	NA	NA	NA	NA	NA	NA	NA	NA	NA
1	5	rs246776	rs3828139	T	C	44253015	5.496	3.89e-08	0.967122	T	C	0.01492	0.00292105	3.26035e-07	T	C	0.00841416	0.00505962	0.09626	T	C	0.01	0.002	7.17e-05
1	5	rs11577684	rs11577684	C	G	44254280	-5.774	7.75e-09	1	C	G	-0.0154415	0.00321904	1.61105e-06	C	G	-0.015409	0.00634637	0.01517	C	G	-0.013	0.003	1.106e-06
1	5	rs2906455	rs6691988	A	G	44254402	5.51	3.59e-08	0.884732	A	G	0.0324383	0.00467568	3.98633e-12	A	G	0.0351709	0.00831858	2.361e-05	A	G	0.022	0.004	1.652e-07
1	5	rs11577684	rs9787240	A	G	44256468	-5.718	1.08e-08	0.968113	A	G	-0.0161294	0.00322402	5.64793e-07	A	G	-0.0160962	0.0063521	0.01128	A	G	-0.013	0.003	1.206e-06
1	5	rs2906455	rs1354261	A	C	44256682	-5.384	7.29e-08	0.884732	A	C	-0.0312653	0.00484206	1.0679e-10	A	C	-0.0314998	0.00944805	0.0008573	A	C	-0.022	0.004	1.385e-07
1	5	rs2906455	rs1502907	A	G	44258040	-5.432	5.57e-08	0.929226	A	G	-0.0339001	0.00483788	2.43086e-12	A	G	-0.034736	0.0083863	3.448e-05	A	G	-0.022	0.004	1.931e-07
1	5	rs11577684	rs34224911	A	T	44258341	-5.711	1.13e-08	0.9908	A	T	-0.0148022	0.00322283	4.37087e-06	A	T	-0.0153292	0.00635012	0.0158	A	T	-0.012	0.003	2.817e-06
1	5	rs246776	rs6688144	A	G	44258931	-2.289	0.02206	0.611067	A	G	-0.00221457	0.00310297	0.475417	A	G	0.00258164	0.00614677	0.6747	A	G	-0.001	0.002	0.5755
1	5	rs11577684	rs12401813	A	C	44263415	-5.723	1.05e-08	0.9908	A	C	-0.0143613	0.00306496	2.79074e-06	A	C	-0.0138487	0.00527971	0.008711	A	C	-0.012	0.003	3.09e-06
1	5	rs2906455	rs3791055	T	C	44265655	-5.437	5.41e-08	0.929226	T	C	-0.0344195	0.00496268	4.04304e-12	T	C	-0.0370677	0.00914122	5.016e-05	T	C	-0.022	0.004	2.249e-07
1	5	rs2906455	rs9726489	G	C	44267668	NA	NA	0.929226	NA	NA	NA	NA	NA	C	G	0.0357654	0.0100748	0.0003859	NA	NA	NA	NA	NA
1	5	rs246776	rs3791057	T	C	44268012	2.25	0.02445	0.611067	T	C	0.00278549	0.00310122	0.369084	T	C	-0.00281479	0.00614582	0.647	T	C	0.002	0.002	0.5354
1	5	rs2906455	rs11210928	T	C	44268219	5.43	5.65e-08	0.90249	T	C	0.0337883	0.00491574	6.26448e-12	T	C	0.0376829	0.00908678	3.369e-05	T	C	0.022	0.004	2.215e-07
1	5	rs246776	rs6672795	T	C	44268699	2.209	0.02715	0.611067	T	C	0.00278263	0.00310095	0.369534	T	C	-0.00287624	0.0061458	0.6401	T	C	0.002	0.002	0.5325
1	5	rs246776	rs12024345	A	T	44269187	5.506	3.67e-08	0.987597	A	T	0.014062	0.00292301	1.50319e-06	A	T	0.00849983	0.00506244	0.09314	A	T	0.009	0.002	0.0001682
1	5	rs2906455	rs6670344	A	G	44269208	-5.425	5.79e-08	0.929226	A	G	-0.0337785	0.00483831	2.92121e-12	A	G	-0.034921	0.0083864	3.129e-05	A	G	-0.022	0.004	2.261e-07
1	5	rs246776	rs3791058	T	C	44270310	2.204	0.02752	0.611067	T	C	0.00283236	0.00310095	0.361041	T	C	-0.0028517	0.00614591	0.6426	T	C	0.002	0.002	0.5362
1	5	rs246776	rs11580676	A	G	44272529	-2.138	0.0325	0.600332	A	G	-0.00270798	0.00309939	0.382274	A	G	0.00452382	0.00613815	0.4614	A	G	-0.002	0.002	0.4253
1	5	rs2906455	rs246778	T	C	44272761	-5.517	3.45e-08	0.909411	T	C	-0.0328552	0.00484555	1.19762e-11	T	C	-0.0349304	0.00863331	5.221e-05	T	C	-0.022	0.004	2.269e-07
1	5	rs246776	rs12126352	A	G	44273197	-2.144	0.03206	0.600332	A	G	-0.00272604	0.00309911	0.379064	A	G	0.00448108	0.00613846	0.4653	A	G	-0.002	0.002	0.429
1	5	rs2906455	rs246777	C	G	44274434	5.499	3.81e-08	0.912776	C	G	0.0334943	0.00486038	5.52892e-12	C	G	0.0358835	0.00845511	2.199e-05	C	G	0.022	0.004	2.712e-07
1	5	rs246776	rs246776	T	C	44274699	5.558	2.73e-08	1	T	C	0.014869	0.00305437	1.1268e-06	T	C	0.0092522	0.00591951	0.1181	T	C	0.009	0.002	0.0001467
1	5	rs246776	rs12122867	A	G	44275441	-2.194	0.02826	0.600332	A	G	-0.00273506	0.00310043	0.377693	A	G	0.00451179	0.00613848	0.4621	A	G	-0.002	0.002	0.4479
1	5	rs2906455	rs246775	T	C	44275595	-5.273	1.34e-07	0.912776	T	C	-0.0314483	0.00510693	7.36822e-10	T	C	-0.0387387	0.0101703	0.0001394	T	C	-0.017	0.004	1.107e-05
1	5	rs246776	rs3791059	T	C	44276062	-2.104	0.0354	0.600332	T	C	-0.00197797	0.00294714	0.502127	T	C	0.00472538	0.005103	0.3544	T	C	-0.002	0.002	0.4366
1	5	rs246776	rs1012125	T	C	44277099	2.136	0.03269	0.600332	T	C	0.00199957	0.00294541	0.497216	T	C	-0.00465387	0.00510293	0.3618	T	C	0.002	0.002	0.4433
1	5	rs11577684	rs37471	T	C	44277548	5.542	2.99e-08	0.967769	T	C	0.014034	0.00307514	5.02608e-06	T	C	0.0133224	0.00529716	0.01192	T	C	0.012	0.003	1.616e-06
1	5	rs246776	rs12125838	A	G	44277600	-2.077	0.03777	0.600332	A	G	-0.00178869	0.00294806	0.544027	A	G	0.00512301	0.0051026	0.3152	A	G	-0.002	0.002	0.4898
1	5	rs246776	rs12133508	T	C	44277746	-2.114	0.03455	0.600332	T	C	-0.00191629	0.00294571	0.515346	T	C	0.00492381	0.00510239	0.3347	T	C	-0.002	0.002	0.4751
1	5	rs11577684	rs37470	C	G	44277948	5.583	2.37e-08	0.967769	C	G	0.0140354	0.00323668	1.44875e-05	C	G	0.012887	0.00637341	0.04313	C	G	0.012	0.003	1.864e-06
1	5	rs246776	rs37469	A	G	44278722	5.406	6.46e-08	0.987428	A	G	0.0139958	0.00292332	1.68767e-06	A	G	0.00763026	0.00506321	0.1319	A	G	0.009	0.002	0.0001446
1	5	rs246776	rs3791062	C	G	44279223	-2.059	0.03945	0.600332	C	G	-0.00261581	0.00294715	0.374772	C	G	0.00272469	0.00510241	0.5932	C	G	-0.002	0.002	0.4686
1	5	rs246776	rs3791063	T	C	44279711	2.106	0.03517	0.600332	T	C	0.00194925	0.00294582	0.508163	T	C	-0.00483282	0.0051033	0.3438	T	C	0.002	0.002	0.4425
1	5	rs2906455	rs37468	A	T	44280381	-5.602	2.12e-08	0.939574	A	T	-0.0341849	0.00490316	3.12426e-12	A	T	-0.0350241	0.00851545	3.901e-05	A	T	-0.022	0.004	3.285e-07
1	5	rs246776	rs3791064	T	G	44280425	2.094	0.03624	0.600332	T	G	0.00192899	0.0029458	0.512578	T	G	-0.00485333	0.00510339	0.3416	T	G	0.002	0.002	0.4437
1	5	rs246776	rs972444	A	G	44282204	-2.082	0.03731	0.600332	A	G	-0.00191988	0.00294734	0.514793	A	G	0.00493989	0.0051032	0.3332	A	G	-0.002	0.002	0.4343
1	5	rs246776	rs972443	T	C	44282355	2.113	0.0346	0.600332	T	C	0.0019493	0.00294589	0.508163	T	C	-0.0048179	0.00510371	0.3454	T	C	0.002	0.002	0.4236
1	5	rs2906455	rs37466	T	C	44283071	NA	NA	0.93005	NA	NA	NA	NA	NA	T	C	-0.0391431	0.010175	0.0001195	NA	NA	NA	NA	NA
1	5	rs246776	rs37465	C	T	44283272	NA	NA	0.92013	NA	NA	NA	NA	NA	T	C	-0.00924098	0.00609966	0.1297	NA	NA	NA	NA	NA
1	5	rs2906455	rs541487	A	G	44283909	5.646	1.65e-08	0.93005	A	G	0.0335443	0.00481305	3.18201e-12	A	G	0.0348369	0.00850925	4.233e-05	A	G	0.022	0.004	2.847e-07
1	5	rs2906455	rs37464	A	G	44284161	-5.631	1.79e-08	0.93005	A	G	-0.0335342	0.0048116	3.18197e-12	A	G	-0.0348249	0.00851049	4.28e-05	A	G	-0.022	0.004	2.378e-07
1	5	rs246776	rs37463	A	G	44284348	5.435	5.48e-08	0.962651	A	G	0.0152087	0.00307324	7.46909e-07	A	G	0.00851216	0.00608881	0.162	A	G	0.009	0.002	0.000258
1	5	rs2906455	rs37462	T	C	44284778	5.639	1.72e-08	0.939574	T	C	0.0349012	0.00515248	1.25556e-11	T	C	0.0377037	0.0102428	0.0002323	T	C	0.022	0.004	2.737e-07
1	5	rs2906455	rs39722	C	G	44285663	5.665	1.47e-08	0.939574	C	G	0.0349462	0.00515271	1.18433e-11	C	G	0.0377037	0.0102428	0.0002323	C	G	0.022	0.004	2.772e-07
1	5	rs246776	rs3791067	C	G	44286932	5.41	6.29e-08	0.958693	C	G	0.0151626	0.00307125	7.93597e-07	C	G	0.00835965	0.0060886	0.1696	C	G	0.009	0.002	0.0002751
1	5	rs2906455	rs641356	T	C	44287186	5.701	1.19e-08	0.939574	T	C	0.0349262	0.00512424	9.36947e-12	T	C	0.0375309	0.0102376	0.0002466	T	C	0.022	0.004	2.062e-07
1	5	rs2906455	rs556667	T	G	44287414	5.684	1.32e-08	0.939574	T	G	0.0344097	0.00487297	1.64909e-12	T	G	0.0355551	0.00851008	2.938e-05	T	G	0.022	0.004	1.808e-07
1	5	rs246776	rs12741189	A	C	44287943	2.033	0.04207	0.600332	A	C	0.00263058	0.00310065	0.396219	A	C	-0.00488043	0.00613891	0.4266	A	C	0.002	0.002	0.5296
1	5	rs246776	rs37460	C	G	44288364	-5.429	5.67e-08	0.958693	C	G	-0.014195	0.00291989	1.1651e-06	C	G	-0.0072031	0.00506191	0.1547	C	G	-0.009	0.002	0.000287
1	5	rs246776	rs12131981	A	G	44289080	-2.06	0.03943	0.600332	A	G	-0.00193318	0.00294832	0.512025	A	G	0.00489417	0.00510341	0.3375	A	G	-0.002	0.002	0.5315
1	5	rs11577684	rs37459	A	G	44289397	-5.554	2.8e-08	0.967769	A	G	-0.014021	0.00320892	1.24594e-05	A	G	-0.0132656	0.00618154	0.0319	A	G	-0.012	0.003	1.846e-06
1	5	rs11577684	rs37458	A	G	44290530	-5.603	2.11e-08	0.963202	A	G	-0.0138915	0.00306468	5.82133e-06	A	G	-0.0130906	0.00529556	0.01345	A	G	-0.012	0.003	2.059e-06
1	5	rs2906455	rs37457	A	G	44291191	5.706	1.16e-08	0.939574	A	G	0.0338924	0.00508007	2.52944e-11	A	G	0.0329356	0.00966987	0.0006593	A	G	0.022	0.004	2.474e-07
1	5	rs11577684	rs37456	T	C	44292989	5.584	2.36e-08	0.967769	T	C	0.0135135	0.00315296	1.81951e-05	T	C	0.0113717	0.00577536	0.04891	T	C	0.012	0.003	1.652e-06
1	5	rs11577684	rs37455	A	G	44294228	-5.593	2.23e-08	0.963202	A	G	-0.0139319	0.00322349	1.54627e-05	A	G	-0.0127793	0.00637055	0.04481	A	G	-0.012	0.003	1.697e-06
1	5	rs11577684	rs37454	A	C	44294411	5.59	2.27e-08	0.96312	A	C	0.0140438	0.00323298	1.39952e-05	A	C	0.0129535	0.00637161	0.04203	A	C	0.012	0.003	2.901e-06
1	5	rs246776	rs11580407	A	T	44294920	-2.053	0.04006	0.600332	A	T	-0.00192234	0.0031005	0.535252	A	T	0.00511438	0.00613972	0.4047	A	T	-0.001	0.002	0.5489
1	5	rs11577684	rs37453	A	G	44295047	-5.602	2.11e-08	0.967769	A	G	-0.0139686	0.00307644	5.61193e-06	A	G	-0.0130981	0.00529645	0.0134	A	G	-0.012	0.003	2.053e-06
1	5	rs2906455	rs42962	A	C	44298564	-5.522	3.35e-08	0.948741	A	C	-0.0313557	0.0058444	8.09127e-08	NA	NA	NA	NA	NA	A	C	-0.02	0.005	0.0001957
1	5	rs2906455	rs246774	T	C	44299695	5.798	6.72e-09	0.958744	T	C	0.0366866	0.00520215	1.76118e-12	T	C	0.0389744	0.010349	0.0001658	T	C	0.022	0.004	1.734e-07
1	5	rs2906455	rs246773	A	G	44300249	-5.854	4.8e-09	0.969095	A	G	-0.0366805	0.00520627	1.84874e-12	A	G	-0.0387833	0.0103367	0.0001754	A	G	-0.022	0.004	1.337e-07
1	5	rs2906455	rs3011218	A	T	44303329	5.996	2.02e-09	0.959093	A	T	0.0361695	0.00510987	1.45872e-12	A	T	0.0395814	0.0103319	0.0001277	A	T	0.022	0.004	5.199e-07
1	5	rs2906455	rs2906470	T	C	44306559	-5.863	4.55e-09	0.979263	T	C	-0.0368424	0.00519998	1.38933e-12	T	C	-0.0394659	0.0103368	0.0001346	T	C	-0.022	0.004	1.636e-07
1	5	rs2906455	rs3011221	A	G	44312109	-5.849	4.93e-09	0.969095	A	G	-0.0348436	0.00485702	7.29135e-13	A	G	-0.0345584	0.00858594	5.701e-05	A	G	-0.022	0.004	1.664e-07
1	5	rs2906455	rs2906467	A	C	44320476	5.891	3.84e-09	0.989603	A	C	0.0371533	0.00507003	2.33551e-13	A	C	0.0392208	0.00937848	2.889e-05	A	C	0.023	0.004	1.213e-07
1	5	rs2906455	rs3124746	C	G	44320934	5.885	3.98e-09	0.989603	C	G	0.0372613	0.00507003	1.99209e-13	C	G	0.0396977	0.00939812	2.401e-05	C	G	0.023	0.004	1.317e-07
1	5	rs2906455	rs12760568	C	T	44323254	NA	NA	0.804823	NA	NA	NA	NA	NA	T	C	0.03554	0.00980143	0.0002884	NA	NA	NA	NA	NA
1	5	rs2906455	rs7417507	C	T	44323258	NA	NA	0.804823	T	C	0.036367	0.00715109	3.66609e-07	T	C	0.03554	0.00980143	0.0002884	T	C	0.022	0.005	4.042e-05
1	5	rs2906455	rs2906465	T	C	44323736	-5.903	3.57e-09	0.989603	T	C	-0.0373131	0.00507003	1.84538e-13	T	C	-0.0399172	0.00940557	2.2e-05	T	C	-0.023	0.004	1.184e-07
1	5	rs2906455	rs3011226	A	G	44324060	5.903	3.57e-09	0.989603	A	G	0.0373547	0.00519901	6.72291e-13	A	G	0.0403313	0.0103679	0.0001002	A	G	0.023	0.004	1.302e-07
1	5	rs2906455	rs3011227	A	G	44325409	5.922	3.19e-09	0.979263	A	G	0.0350355	0.00477217	2.1101e-13	A	G	0.0358954	0.00861009	3.054e-05	A	G	0.023	0.004	1.234e-07
1	5	rs2906455	rs3011229	A	G	44328017	-5.887	3.93e-09	0.979263	A	G	-0.0351526	0.00485628	4.53441e-13	A	G	-0.0348039	0.00861484	5.342e-05	A	G	-0.023	0.004	1.356e-07
1	5	rs2906455	rs2906464	T	C	44329803	5.891	3.84e-09	0.989603	T	C	0.0373235	0.00520385	7.37507e-13	T	C	0.0399974	0.0103567	0.0001123	T	C	0.023	0.004	1.121e-07
1	5	rs2906455	rs2906463	A	G	44330048	-5.893	3.79e-09	0.979263	A	G	-0.0366651	0.00510783	7.06334e-13	A	G	-0.0402688	0.0103625	0.0001021	A	G	-0.023	0.004	1.254e-07
1	5	rs2906455	rs2906462	A	G	44332084	5.878	4.15e-09	0.979263	A	G	0.0366461	0.00510399	6.97668e-13	A	G	0.0402688	0.0103625	0.0001021	A	G	0.023	0.004	1.147e-07
1	5	rs2906455	rs2906461	C	G	44334228	5.871	4.33e-09	0.989603	C	G	0.037314	0.00507073	1.85719e-13	C	G	0.0396982	0.00939825	2.403e-05	C	G	0.023	0.004	9.04e-08
1	5	rs2906455	rs2906460	A	G	44335323	-5.875	4.24e-09	0.979263	A	G	-0.0366768	0.00510467	6.72291e-13	A	G	-0.0402688	0.0103625	0.0001021	A	G	-0.023	0.004	1.038e-07
1	5	rs2906455	rs2906459	A	C	44335657	-5.876	4.21e-09	0.979263	A	C	-0.0366759	0.00510874	7.01988e-13	A	C	-0.0402688	0.0103625	0.0001021	A	C	-0.023	0.004	1.083e-07
1	5	rs2906455	rs3011230	T	G	44340655	5.859	4.65e-09	1	T	G	0.0374307	0.00520409	6.35915e-13	T	G	0.0405461	0.0103645	9.146e-05	T	G	0.023	0.004	6.437e-08
1	5	rs2906455	rs2906456	T	C	44340920	-5.928	3.06e-09	1	T	C	-0.0360068	0.00494846	3.42952e-13	T	C	-0.0351657	0.00861905	4.509e-05	T	C	-0.023	0.004	5.076e-08
1	5	rs2906455	rs2906455	T	C	44341895	-6.153	7.6e-10	1	T	C	-0.0374492	0.00520361	6.16549e-13	T	C	-0.0406844	0.0103681	8.701e-05	T	C	-0.023	0.004	3.628e-08
1	5	rs2906455	rs3011231	A	G	44342235	-5.863	4.54e-09	1	A	G	-0.0374161	0.00507521	1.67685e-13	A	G	-0.0400458	0.00939821	2.031e-05	A	G	-0.023	0.004	7.168e-08
1	5	rs2906455	rs3791097	C	G	44349381	-5.84	5.22e-09	1	C	G	-0.0374757	0.00520302	5.90405e-13	C	G	-0.040772	0.0103587	8.27e-05	C	G	-0.023	0.004	7.32e-08
1	5	rs2906455	rs17474535	A	G	44353084	5.867	4.44e-09	1	A	G	0.036046	0.00494277	3.03854e-13	A	G	0.0351069	0.00861518	4.609e-05	A	G	0.023	0.004	7.427e-08
1	5	rs2906455	rs61770286	A	G	44356609	5.845	5.05e-09	1	A	G	0.0376103	0.00519856	4.6638e-13	A	G	0.0415293	0.0103797	6.306e-05	A	G	0.023	0.004	6.634e-08
1	5	rs2906455	rs61770287	T	C	44359205	-5.835	5.39e-09	1	T	C	-0.0375242	0.00520365	5.54936e-13	T	C	-0.0410947	0.0103774	7.484e-05	T	C	-0.023	0.004	7.358e-08
1	5	rs2906455	rs17533707	T	C	44361533	-5.883	4.03e-09	1	T	C	-0.0361002	0.00494846	2.981e-13	T	C	-0.0350715	0.00861072	4.634e-05	T	C	-0.023	0.004	6.527e-08
1	5	rs2906455	rs61770289	T	C	44363710	5.889	3.89e-09	1	T	C	0.0367898	0.00593958	5.86554e-10	NA	NA	NA	NA	NA	T	C	0.023	0.004	6.002e-08
1	5	rs2906455	rs783304	A	G	44365457	3.195	0.001398	0.697407	A	G	0.0200138	0.00421107	2.00753e-06	A	G	0.0265592	0.00769387	0.0005562	A	G	0.013	0.004	0.0002971
1	5	rs11577684	rs3791101	A	G	44366250	4.146	3.38e-05	0.631565	A	G	0.0133719	0.00319457	2.84149e-05	A	G	0.0159466	0.00548559	0.003643	A	G	0.012	0.003	7.141e-06
1	5	rs2906455	rs783301	T	C	44369009	-5.813	6.13e-09	0.989664	T	C	-0.0381454	0.00518762	1.93567e-13	T	C	-0.0406904	0.010338	8.291e-05	T	C	-0.024	0.004	4.373e-08
1	5	rs2906455	rs2485995	A	G	44369600	-5.814	6.1e-09	0.989664	A	G	-0.0381456	0.00518705	1.92348e-13	A	G	-0.0406796	0.0103379	8.328e-05	A	G	-0.024	0.004	4.325e-08
1	5	rs2906455	rs148773406	A	G	44371107	NA	NA	0.958744	A	G	-0.0463343	0.00757514	9.55764e-10	A	G	-0.0407718	0.0103824	8.608e-05	A	G	-0.023	0.004	6.038e-08
1	5	rs2906455	rs147671612	T	C	44371437	NA	NA	0.886928	T	C	-0.0438765	0.00773961	1.43567e-08	T	C	-0.0469485	0.0106074	9.586e-06	T	C	-0.018	0.004	7.18e-05
1	5	rs2906455	rs142328051	C	T	44371441	NA	NA	0.886928	T	C	0.0509042	0.0077335	4.63244e-11	T	C	0.0466784	0.0105991	1.061e-05	T	C	0.024	0.004	3.213e-08
1	5	rs2906455	rs2906598	G	C	44372290	NA	NA	0.969095	C	G	0.0472716	0.00754336	3.68884e-10	C	G	0.0405284	0.0103389	8.851e-05	C	G	0.024	0.004	1.124e-07
1	5	rs2906455	rs2993621	C	T	44372291	NA	NA	0.969095	T	C	0.0472725	0.0075435	3.68884e-10	T	C	0.0405292	0.0103391	8.86e-05	T	C	0.024	0.004	1.429e-07
1	5	rs2906455	rs2486012	A	G	44373409	5.847	5e-09	0.969095	A	G	0.0374917	0.00505743	1.23291e-13	A	G	0.0397249	0.0093713	2.243e-05	A	G	0.023	0.004	1.264e-07
1	5	rs2906455	rs2428963	T	C	44373439	-5.914	3.34e-09	0.969095	T	C	-0.0359225	0.00493106	3.21803e-13	T	C	-0.0343731	0.00858898	6.27e-05	T	C	-0.023	0.004	1.187e-07
1	5	rs2906455	rs2248305	T	C	44379493	-5.847	5.01e-09	0.969095	T	C	-0.0369048	0.00505771	2.94802e-13	T	C	-0.0392287	0.00936692	2.814e-05	T	C	-0.022	0.004	1.987e-07
1	5	rs2906455	rs1859725	A	G	44379577	5.859	4.65e-09	0.969095	A	G	0.036896	0.00505827	3.0045e-13	A	G	0.0392099	0.00936692	2.837e-05	A	G	0.022	0.004	1.958e-07
1	5	rs2906455	rs1766964	T	C	44381847	5.841	5.19e-09	0.959093	T	C	0.037239	0.00518413	6.80648e-13	T	C	0.0395019	0.0103165	0.0001286	T	C	0.023	0.004	1.326e-07
1	5	rs2906455	rs1766966	A	G	44382515	5.873	4.29e-09	0.949254	A	G	0.0364612	0.00507049	6.43828e-13	A	G	0.0396051	0.0103111	0.0001223	A	G	0.023	0.004	1.199e-07
1	5	rs2906455	rs61770291	G	A	44383123	NA	NA	0.948256	A	G	0.0444353	0.00753213	3.64764e-09	A	G	0.0395495	0.0103236	0.0001275	A	G	0.022	0.004	3.408e-07
1	5	rs11577684	rs4660756	T	C	44383914	4.328	1.5e-05	0.603762	T	C	0.0139415	0.00338729	3.85798e-05	T	C	0.0160045	0.00664086	0.01595	T	C	0.013	0.003	5.427e-06
1	5	rs2906455	rs1636877	A	G	44387625	-6.024	1.7e-09	0.948256	A	G	-0.0372952	0.00517874	5.95167e-13	A	G	-0.0394593	0.0103189	0.0001313	A	G	-0.022	0.004	2.088e-07
1	5	rs2906455	rs2245439	T	C	44389959	-5.941	2.83e-09	0.948256	T	C	-0.0370074	0.00517701	8.77876e-13	T	C	-0.0385019	0.0103195	0.0001905	T	C	-0.022	0.004	1.811e-07
1	5	rs2906455	rs2485991	T	C	44391722	5.958	2.55e-09	0.928433	T	C	0.03439	0.00480993	8.69076e-13	T	C	0.0331526	0.00857985	0.0001117	T	C	0.022	0.004	2.397e-07
1	5	rs2906455	rs2428961	T	C	44392921	-5.925	3.12e-09	0.938262	T	C	-0.0368381	0.00518024	1.14976e-12	T	C	-0.0390039	0.0103294	0.0001596	T	C	-0.022	0.004	2.995e-07
1	5	rs2906455	rs2428960	A	G	44393146	5.919	3.24e-09	0.938262	A	G	0.0368348	0.00517794	1.12885e-12	A	G	0.0388806	0.0103296	0.0001672	A	G	0.022	0.004	3.321e-07
1	5	rs2906455	rs2428959	T	C	44395224	-5.901	3.61e-09	0.938262	T	C	-0.0365072	0.005173	1.6982e-12	T	C	-0.0389058	0.0103171	0.0001624	T	C	-0.022	0.004	4.639e-07
1	5	rs2906455	rs1859726	T	C	44396215	5.947	2.73e-09	0.928433	T	C	0.0348271	0.00491951	1.44791e-12	T	C	0.032275	0.00857694	0.000168	T	C	0.022	0.004	4.483e-07
1	5	rs2906455	rs2485990	A	G	44396790	-5.953	2.63e-09	0.928433	A	G	-0.0360421	0.00517411	3.26418e-12	A	G	-0.0382818	0.0103158	0.0002064	A	G	-0.021	0.004	6.168e-07
1	5	rs2906455	rs1548634	T	C	44399608	6.011	1.84e-09	0.928433	T	C	0.0337689	0.00480619	2.12347e-12	T	C	0.0322037	0.00857621	0.0001734	T	C	0.022	0.004	4.923e-07
1	5	rs2906455	rs1766968	T	C	44403042	5.965	2.44e-09	0.907792	T	C	0.0364461	0.00523845	3.46576e-12	T	C	0.0384845	0.010512	0.0002516	T	C	0.021	0.004	1.236e-06
1	5	rs2906455	rs3120804	T	G	44405214	5.911	3.4e-09	0.907792	T	G	0.0361547	0.00527269	7.03334e-12	T	G	0.0379125	0.0105137	0.0003115	T	G	0.021	0.004	1.359e-06
1	5	rs2906455	rs3120805	T	C	44406113	-5.918	3.26e-09	0.907792	T	C	-0.0362369	0.00527299	6.32333e-12	T	C	-0.0383424	0.0105192	0.0002677	T	C	-0.021	0.004	8.177e-07
1	5	rs2906455	rs2906597	A	G	44406725	5.928	3.07e-09	0.907792	A	G	0.0367514	0.00527319	3.18113e-12	A	G	0.0383424	0.0105192	0.0002678	A	G	0.022	0.004	7.393e-07
1	5	rs2906455	rs2485989	T	C	44408454	5.929	3.05e-09	0.907371	T	C	0.0357755	0.00526012	1.037e-11	T	C	0.0380607	0.0104937	0.0002871	T	C	0.021	0.004	9.131e-07
1	5	rs2906455	rs2428957	A	G	44409048	6.006	1.9e-09	0.897548	A	G	0.0356441	0.00518227	6.06662e-12	A	G	0.0381148	0.0105086	0.0002865	A	G	0.021	0.004	8.645e-07
1	5	rs2906455	rs2486014	T	C	44419546	5.806	6.41e-09	0.877701	T	C	0.0352046	0.00525688	2.12939e-11	T	C	0.0367674	0.01049	0.000457	T	C	0.022	0.004	3.681e-07
1	5	rs2906455	rs1008137	T	C	44420754	-5.744	9.25e-09	0.877701	T	C	-0.0330394	0.00491943	1.86667e-11	T	C	-0.0309722	0.00871475	0.000379	T	C	-0.022	0.004	2.826e-07
1	5	rs2906455	rs1636879	C	G	44428680	-5.777	7.61e-09	0.877701	C	G	-0.0322701	0.00510341	2.5614e-10	C	G	-0.0297609	0.00988734	0.002611	C	G	-0.021	0.004	6.443e-07
1	5	rs2906455	rs2486007	A	G	44434613	5.764	8.23e-09	0.867563	A	G	0.0346375	0.00521161	3.00708e-11	A	G	0.0356637	0.010511	0.0006909	A	G	0.022	0.004	3.698e-07
1	5	rs2906455	rs783308	A	C	44438396	3.473	0.0005139	0.602928	A	C	0.0174601	0.00420999	3.36412e-05	A	C	0.0215495	0.00741807	0.00367	A	C	0.011	0.004	0.002332
1	5	rs2906455	rs4221	A	G	44438961	3.48	0.0005018	0.602928	A	G	0.0174086	0.00412748	2.46776e-05	A	G	0.0223422	0.00740542	0.002552	A	G	0.011	0.004	0.002851
1	5	rs2906455	rs2428954	A	G	44442930	5.584	2.36e-08	0.79766	A	G	0.0287561	0.0046891	8.64854e-10	A	G	0.0278331	0.00838599	0.0009034	A	G	0.018	0.004	3.89e-06
1	5	rs2906455	rs2428953	A	G	44443459	-5.78	7.48e-09	0.787607	A	G	-0.0293521	0.00471149	4.66719e-10	A	G	-0.0284322	0.00843184	0.0007464	A	G	-0.019	0.004	3.548e-06
1	5	rs2906455	rs2231283	G	C	44450737	NA	NA	0.877701	C	G	0.0419656	0.00764695	4.06765e-08	C	G	0.0360239	0.0104812	0.0005877	C	G	0.021	0.004	1.285e-06
1	5	rs2906455	rs2993619	T	C	44455203	-5.387	7.17e-08	0.735808	T	C	-0.0299731	0.00496099	1.52452e-09	T	C	-0.032592	0.00998836	0.001102	T	C	-0.018	0.004	1.205e-05
1	5	rs2906455	rs803619	T	C	44465419	-4.414	1.02e-05	0.641163	T	C	-0.0302908	0.00506081	2.15911e-09	T	C	-0.0282779	0.0100705	0.004992	T	C	-0.022	0.004	1.217e-07
1	6	rs2420551	rs861252	A	C	69237163	-5.013	5.35e-07	0.600315	A	C	-0.0255825	0.00495421	2.42004e-07	A	C	-0.0281844	0.00922266	0.002244	A	C	-0.013	0.004	0.001115
1	6	rs2420551	rs854270	T	C	69245272	-5.017	5.25e-07	0.600315	T	C	-0.0278565	0.00483047	8.07814e-09	T	C	-0.0350147	0.0084556	3.457e-05	T	C	-0.013	0.004	0.001167
1	6	rs2420551	rs11579356	A	G	69292081	4.978	6.44e-07	0.640794	A	G	0.0277328	0.00513316	6.56559e-08	A	G	0.0318114	0.0102551	0.00192	A	G	0.014	0.004	0.0006774
1	6	rs2420551	rs955842	T	C	69295023	-4.818	1.45e-06	0.642557	T	C	-0.0276774	0.0047529	5.77053e-09	T	C	-0.031264	0.00850028	0.000235	T	C	-0.015	0.004	0.0004252
1	6	rs2420551	rs955841	A	G	69295070	-4.998	5.78e-07	0.631329	A	G	-0.0287045	0.00493827	6.14903e-09	A	G	-0.0323461	0.00853234	0.00015	A	G	-0.014	0.004	0.0005765
1	6	rs2420551	rs6671981	A	G	69298988	4.782	1.74e-06	0.642557	A	G	0.027492	0.00499319	3.67305e-08	A	G	0.0325868	0.0102313	0.001449	A	G	0.015	0.004	0.0004157
1	6	rs2420551	rs6672072	A	G	69299046	4.763	1.91e-06	0.642557	A	G	0.0252726	0.00486893	2.09628e-07	A	G	0.0239718	0.00926626	0.009692	A	G	0.015	0.004	0.0004248
1	6	rs2420551	rs34599182	T	C	69301219	4.938	7.88e-07	0.640794	NA	NA	NA	NA	NA	NA	NA	NA	NA	NA	NA	NA	NA	NA	NA
1	6	rs2420551	rs11589397	T	C	69302144	4.974	6.57e-07	0.631329	T	C	0.0290368	0.00518554	2.14875e-08	T	C	0.0336788	0.0103531	0.001143	T	C	0.015	0.004	0.0004222
1	6	rs2420551	rs17488264	T	C	69302771	-5.014	5.34e-07	0.631329	T	C	-0.0269243	0.00506559	1.0657e-07	T	C	-0.0261436	0.00930378	0.004951	T	C	-0.014	0.004	0.0006132
1	6	rs2420551	rs2131125	T	C	69303617	-4.534	5.8e-06	0.672807	T	C	-0.0242199	0.00496312	1.06098e-06	T	C	-0.0220353	0.00944102	0.01959	T	C	-0.014	0.004	0.001047
1	6	rs2420551	rs11209356	C	G	69304252	-4.718	2.38e-06	0.67145	C	G	-0.0251157	0.00510481	8.65428e-07	C	G	-0.0229191	0.00946681	0.01548	C	G	-0.014	0.004	0.0009813
1	6	rs2420551	rs11209357	A	G	69306780	5.259	1.45e-07	0.72181	A	G	0.0277872	0.00503669	3.44925e-08	A	G	0.0331617	0.0100247	0.0009397	A	G	0.012	0.004	0.002812
1	6	rs2420551	rs57887245	T	C	69309391	-5.25	1.52e-07	0.72181	T	C	-0.0281206	0.00503604	2.35207e-08	T	C	-0.0327271	0.0100175	0.001086	T	C	-0.013	0.004	0.002131
1	6	rs2420551	rs1388650	C	G	69310422	5.302	1.14e-07	0.711909	C	G	0.0284186	0.00483577	4.18401e-09	C	G	0.0309614	0.00832744	0.0002005	C	G	0.013	0.004	0.002124
1	6	rs2420551	rs72680446	A	C	69310692	-5.295	1.19e-07	0.711909	A	C	-0.0286339	0.00508491	1.79015e-08	A	C	-0.0331234	0.0100222	0.0009491	A	C	-0.013	0.004	0.002288
1	6	rs2420551	rs4145632	A	T	69312383	-5.096	3.47e-07	0.72349	A	T	-0.027548	0.00490973	2.01287e-08	A	T	-0.0332253	0.00999857	0.0008912	A	T	-0.013	0.004	0.002112
1	6	rs2420551	rs9988609	A	G	69315228	5.088	3.62e-07	0.72349	A	G	0.0268534	0.00466836	8.80793e-09	A	G	0.0296305	0.00836547	0.0003964	A	G	0.013	0.004	0.00177
1	6	rs2420551	rs115699118	A	G	69316628	5.211	1.88e-07	0.720293	A	G	0.0285516	0.00508402	1.95479e-08	A	G	0.033177	0.0100354	0.0009455	A	G	0.013	0.004	0.001914
1	6	rs2420551	rs1844945	T	C	69318202	-5.085	3.68e-07	0.731763	T	C	-0.0250544	0.00476704	1.47415e-07	T	C	-0.023653	0.00904512	0.008913	T	C	-0.013	0.004	0.001628
1	6	rs2420551	rs1826357	T	G	69318536	-5.068	4.03e-07	0.731763	T	G	-0.0272503	0.00490835	2.82727e-08	T	G	-0.0322022	0.00997898	0.001249	T	G	-0.013	0.004	0.001964
1	6	rs2420551	rs12081058	T	G	69318871	5.138	2.77e-07	0.740181	T	G	0.0276585	0.00498341	2.8547e-08	T	G	0.0323084	0.00998713	0.001218	T	G	0.013	0.004	0.002106
1	6	rs2420551	rs12092194	A	G	69318950	-5.189	2.12e-07	0.740181	A	G	-0.0276796	0.00498341	2.78659e-08	A	G	-0.0322984	0.00998713	0.001219	A	G	-0.013	0.004	0.001742
1	6	rs2420551	rs1586834	A	G	69319269	5.121	3.03e-07	0.72181	A	G	0.0273487	0.00494941	3.28276e-08	A	G	0.0321555	0.00998928	0.001288	A	G	0.013	0.004	0.00221
1	6	rs2420551	rs7414744	T	C	69323222	5.15	2.6e-07	0.720293	T	C	0.0280266	0.00483406	6.72156e-09	T	C	0.0305351	0.00834064	0.0002513	T	C	0.013	0.004	0.001787
1	6	rs2420551	rs11589723	T	C	69328993	-5.249	1.53e-07	0.905015	T	C	-0.0313465	0.00518461	1.48431e-09	T	C	-0.0386369	0.0103252	0.0001825	T	C	-0.015	0.004	0.0004598
1	6	rs2420551	rs56197584	T	C	69329184	5.227	1.72e-07	0.905015	T	C	0.031147	0.00518127	1.83865e-09	T	C	0.0381504	0.0103501	0.0002274	T	C	0.015	0.004	0.0004548
1	6	rs2420551	rs55695883	T	C	69329661	5.185	2.17e-07	0.905015	T	C	0.0312632	0.00517011	1.47655e-09	T	C	0.038887	0.0103313	0.0001675	T	C	0.015	0.004	0.0004928
1	6	rs2420551	rs139380747	T	C	69331103	5.161	2.46e-07	0.915627	T	C	0.0312816	0.00516235	1.36491e-09	T	C	0.0394256	0.0103479	0.0001391	T	C	0.015	0.004	0.0003948
1	6	rs2420551	rs7552964	A	T	69331299	5.182	2.2e-07	0.905015	A	T	0.0312614	0.00517342	1.51571e-09	A	T	0.0389203	0.0103429	0.0001679	A	T	0.015	0.004	0.0003654
1	6	rs2420551	rs7518408	A	C	69331338	-5.172	2.32e-07	0.905015	A	C	-0.0312224	0.00517347	1.58876e-09	A	C	-0.0387351	0.0103349	0.0001783	A	C	-0.015	0.004	0.0003631
1	6	rs2420551	rs7541414	T	C	69331574	NA	NA	0.915627	T	C	0.0359466	0.00753754	1.8513e-06	T	C	0.0388136	0.010331	0.0001719	T	C	0.015	0.004	0.0004273
1	6	rs2420551	rs72680454	T	G	69332219	-5.278	1.31e-07	0.905699	T	G	-0.0307334	0.00511916	1.9298e-09	T	G	-0.0384968	0.0103542	0.000201	T	G	-0.014	0.004	0.0005849
1	6	rs2420551	rs72680455	T	C	69332220	-5.265	1.4e-07	0.905699	T	C	-0.0305709	0.00509925	2.03275e-09	T	C	-0.0383649	0.0103521	0.0002103	T	C	-0.014	0.004	0.000608
1	6	rs2420551	rs12240114	C	G	69332409	5.162	2.44e-07	0.916361	C	G	0.0269501	0.00489628	3.70838e-08	C	G	0.0254074	0.00934438	0.006556	C	G	0.014	0.004	0.0006377
1	6	rs2420551	rs9436416	A	T	69332567	-5.105	3.31e-07	0.916361	A	T	-0.0267955	0.00489774	4.47523e-08	A	T	-0.025379	0.00934425	0.006613	A	T	-0.014	0.004	0.0007111
1	6	rs2420551	rs72680457	A	G	69332670	-5.196	2.03e-07	0.915627	A	G	-0.0307747	0.00516305	2.51369e-09	A	G	-0.0391112	0.0103196	0.0001508	A	G	-0.014	0.004	0.0006618
1	6	rs2420551	rs72680458	A	G	69332742	-5.177	2.25e-07	0.906753	A	G	-0.0307418	0.00516338	2.61968e-09	A	G	-0.0389369	0.0103171	0.0001607	A	G	-0.014	0.004	0.0005718
1	6	rs2420551	rs11582472	T	C	69333268	5.166	2.4e-07	0.915627	T	C	0.0306906	0.00516576	2.83027e-09	T	C	0.0388635	0.0103223	0.0001663	T	C	0.014	0.004	0.0005564
1	6	rs2420551	rs11577312	T	C	69334154	-5.161	2.46e-07	0.905015	T	C	-0.0283295	0.00504637	1.97887e-08	T	C	-0.0267375	0.00935859	0.004279	T	C	-0.015	0.004	0.0003455
1	6	rs2420551	rs6674177	A	G	69334834	5.165	2.41e-07	0.916361	A	G	0.0281279	0.00476793	3.64837e-09	A	G	0.0303253	0.00857372	0.000404	A	G	0.014	0.004	0.0007689
1	6	rs2420551	rs150821249	A	G	69335912	-5.203	1.96e-07	0.915627	A	G	-0.0312464	0.00516374	1.43838e-09	A	G	-0.0388818	0.0103217	0.0001653	A	G	-0.015	0.004	0.0003659
1	6	rs2420551	rs28450101	T	C	69336098	5.084	3.69e-07	0.905699	T	C	0.0308598	0.00508424	1.28155e-09	T	C	0.0388846	0.0103142	0.0001632	T	C	0.015	0.004	0.0004307
1	6	rs2420551	rs28759443	T	C	69336277	5.234	1.66e-07	0.915627	T	C	0.03023	0.0051655	4.84882e-09	T	C	0.0389036	0.0103056	0.0001599	T	C	0.013	0.004	0.0008638
1	6	rs2420551	rs201068429	C	A	69336861	NA	NA	0.915627	NA	NA	NA	NA	NA	A	C	-0.0388635	0.0103223	0.0001663	NA	NA	NA	NA	NA
1	6	rs2420551	rs13376205	T	C	69337156	-4.01	6.07e-05	0.662649	T	C	-0.0289284	0.00615726	2.62386e-06	T	C	-0.0334865	0.0123022	0.006493	T	C	-0.015	0.005	0.0026
1	6	rs2420551	rs72680459	A	G	69337596	5.113	3.18e-07	0.895941	A	G	0.0312384	0.00516529	1.46884e-09	A	G	0.038948	0.0103255	0.0001622	A	G	0.015	0.004	0.0004538
1	6	rs2420551	rs13374447	T	C	69338706	5.135	2.82e-07	0.915627	T	C	0.0295266	0.00491346	1.86298e-09	T	C	0.0325921	0.00858365	0.0001465	T	C	0.014	0.004	0.0005091
1	6	rs2420551	rs55790538	A	C	69339818	5.071	3.96e-07	0.927139	A	C	0.0302883	0.00515	4.07237e-09	A	C	0.0388223	0.0102841	0.0001603	A	C	0.014	0.004	0.0005087
1	6	rs2420551	rs11588339	A	G	69340693	5.064	4.11e-07	0.927139	A	G	0.030973	0.00515089	1.81959e-09	A	G	0.039555	0.0103008	0.0001232	A	G	0.015	0.004	0.0004762
1	6	rs2420551	rs55873617	T	C	69341380	5.066	4.06e-07	0.927139	T	C	0.0303063	0.00515084	4.01053e-09	T	C	0.0388347	0.0102846	0.0001593	T	C	0.014	0.004	0.0004996
1	6	rs2420551	rs55950045	T	C	69341421	5.08	3.78e-07	0.916525	T	C	0.0303395	0.00516166	4.15628e-09	T	C	0.0385934	0.0102861	0.0001751	T	C	0.014	0.004	0.0006047
1	6	rs2420551	rs56066545	A	T	69341591	NA	NA	0.895453	A	T	0.0351436	0.00756997	3.44223e-06	A	T	0.0369683	0.0103756	0.0003669	A	T	0.015	0.004	0.0004537
1	6	rs2420551	rs10789275	A	C	69341592	-4.898	9.7e-07	0.896195	A	C	-0.029085	0.00500284	6.11049e-09	A	C	-0.0371544	0.010361	0.0003361	A	C	-0.014	0.004	0.0008221
1	6	rs2420551	rs147259794	T	C	69341634	NA	NA	0.927139	T	C	0.0358926	0.00750364	1.72388e-06	T	C	0.0388653	0.0102845	0.0001575	T	C	0.015	0.004	0.0005586
1	6	rs2420551	rs111342054	G	T	69341714	NA	NA	0.927139	NA	NA	NA	NA	NA	T	G	-0.0388853	0.0102844	0.000156	NA	NA	NA	NA	NA
1	6	rs2420551	rs576707628	A	G	69342035	NA	NA	0.927139	NA	NA	NA	NA	NA	A	G	0.0388855	0.0102844	0.0001562	NA	NA	NA	NA	NA
1	6	rs2420551	rs575162614	A	G	69342279	NA	NA	0.927139	NA	NA	NA	NA	NA	A	G	0.0388855	0.0102844	0.0001562	NA	NA	NA	NA	NA
1	6	rs2420551	rs150873690	C	T	69343084	NA	NA	0.927139	T	C	-0.0359021	0.00750357	1.71273e-06	T	C	-0.0388855	0.0102844	0.0001562	T	C	-0.015	0.004	0.0003454
1	6	rs2420551	rs189052754	T	G	69343679	NA	NA	0.647981	T	G	0.0316547	0.00906546	0.000479785	T	G	0.0488553	0.0124251	8.414e-05	T	G	0.009	0.006	0.1673
1	6	rs2420551	rs202181252	T	G	69343690	NA	NA	0.638733	NA	NA	NA	NA	NA	T	G	0.0488199	0.0124255	8.545e-05	NA	NA	NA	NA	NA
1	6	rs2420551	rs201429269	G	T	69344308	NA	NA	0.606158	NA	NA	NA	NA	NA	T	G	-0.013517	0.00851734	0.1124	NA	NA	NA	NA	NA
1	6	rs2420551	rs547251514	G	T	69344429	NA	NA	0.927139	NA	NA	NA	NA	NA	T	G	-0.0389338	0.0102836	0.0001533	NA	NA	NA	NA	NA
1	6	rs2420551	rs368120584	G	A	69344640	NA	NA	0.875236	NA	NA	NA	NA	NA	A	G	-0.04106	0.0107487	0.0001335	NA	NA	NA	NA	NA
1	6	rs2420551	rs369323688	C	G	69345312	NA	NA	0.892474	NA	NA	NA	NA	NA	NA	NA	NA	NA	NA	NA	NA	NA	NA	NA
1	6	rs2420551	rs555275437	A	G	69345313	NA	NA	0.884994	NA	NA	NA	NA	NA	A	G	0.0389354	0.0102841	0.0001531	NA	NA	NA	NA	NA
1	6	rs2420551	rs377682615	C	T	69345832	NA	NA	0.927139	NA	NA	NA	NA	NA	T	C	-0.0389598	0.0102905	0.0001533	NA	NA	NA	NA	NA
1	6	rs2420551	rs560185552	G	C	69346061	NA	NA	0.927139	NA	NA	NA	NA	NA	C	G	-0.0387979	0.010283	0.0001612	NA	NA	NA	NA	NA
1	6	rs2420551	rs115367869	G	T	69346457	NA	NA	0.927139	T	G	-0.035858	0.00750253	1.75777e-06	T	G	-0.0387979	0.010283	0.0001613	T	G	-0.015	0.004	0.0004734
1	6	rs2420551	rs76609612	G	C	69346685	NA	NA	0.89509	NA	NA	NA	NA	NA	C	G	-0.0387803	0.0103941	0.0001908	NA	NA	NA	NA	NA
1	6	rs2420551	rs11802709	G	A	69346713	NA	NA	0.89509	NA	NA	NA	NA	NA	A	G	-0.0387186	0.0103942	0.0001954	NA	NA	NA	NA	NA
1	6	rs2420551	rs11801221	G	T	69346723	NA	NA	0.89509	NA	NA	NA	NA	NA	T	G	-0.0387185	0.0103942	0.0001954	NA	NA	NA	NA	NA
1	6	rs2420551	rs541600070	A	G	69346752	NA	NA	0.915627	NA	NA	NA	NA	NA	A	G	0.0390461	0.0102888	0.0001474	NA	NA	NA	NA	NA
1	6	rs2420551	rs574540746	A	G	69346776	NA	NA	0.905699	NA	NA	NA	NA	NA	A	G	0.0392402	0.0102804	0.0001351	NA	NA	NA	NA	NA
1	6	rs2420551	rs545811614	G	A	69346806	NA	NA	0.905699	NA	NA	NA	NA	NA	A	G	-0.0376604	0.0102589	0.000242	NA	NA	NA	NA	NA
1	6	rs2420551	rs375948504	G	C	69346831	NA	NA	0.915627	NA	NA	NA	NA	NA	C	G	-0.0390187	0.0102897	0.0001493	NA	NA	NA	NA	NA
1	6	rs2420551	rs370590483	A	C	69346851	NA	NA	0.905015	NA	NA	NA	NA	NA	A	C	0.0389983	0.0102898	0.0001509	NA	NA	NA	NA	NA
1	6	rs2420551	rs151188803	T	C	69347126	NA	NA	0.916525	T	C	0.0359231	0.0075008	1.67423e-06	T	C	0.0389431	0.0102806	0.000152	T	C	0.015	0.004	0.0004594
1	6	rs2420551	rs111882121	C	T	69347234	NA	NA	0.927139	NA	NA	NA	NA	NA	T	C	-0.0386772	0.010281	0.0001687	NA	NA	NA	NA	NA
1	6	rs2420551	rs150365963	G	A	69347260	NA	NA	0.927139	A	G	-0.035853	0.00750252	1.76348e-06	A	G	-0.0387875	0.010283	0.000162	A	G	-0.015	0.004	0.0005522
1	6	rs2420551	rs11581649	A	C	69347290	NA	NA	0.927139	A	C	0.0359021	0.00750664	1.72949e-06	A	C	0.0388706	0.0102887	0.0001578	A	C	0.015	0.004	0.0004063
1	6	rs2420551	rs11209362	A	C	69347850	-5.01	5.44e-07	0.917364	A	C	-0.029521	0.00486949	1.34068e-09	A	C	-0.0339311	0.00884544	0.0001248	A	C	-0.015	0.004	0.0003443
1	6	rs2420551	rs11576549	T	G	69348545	-5.031	4.89e-07	0.927139	T	G	-0.0277009	0.00502123	3.45315e-08	T	G	-0.0262523	0.00932585	0.004875	T	G	-0.015	0.004	0.0004768
1	6	rs2420551	rs55815583	T	C	69348956	5.05	4.41e-07	0.927139	T	C	0.0308601	0.00515091	2.08299e-09	T	C	0.0389888	0.0102819	0.0001496	T	C	0.015	0.004	0.0004664
1	6	rs2420551	rs72680464	A	G	69350330	-4.908	9.21e-07	0.907751	A	G	-0.0306384	0.00509453	1.81014e-09	A	G	-0.0391309	0.0102733	0.0001397	A	G	-0.015	0.004	0.0004129
1	6	rs2420551	rs72680465	A	C	69350425	4.939	7.86e-07	0.917364	A	C	0.0305882	0.00509475	1.92681e-09	A	C	0.0389318	0.0102831	0.0001531	A	C	0.015	0.004	0.0003272
1	6	rs2420551	rs72680466	A	C	69350576	-4.906	9.31e-07	0.917364	A	C	-0.0304403	0.00507226	1.95711e-09	A	C	-0.039017	0.010273	0.000146	A	C	-0.015	0.004	0.0003551
1	6	rs2420551	rs72680467	A	G	69350993	-4.933	8.08e-07	0.917364	A	G	-0.0305938	0.00509498	1.91682e-09	A	G	-0.0389388	0.0102768	0.0001515	A	G	-0.015	0.004	0.0003859
1	6	rs2420551	rs4326670	T	C	69351205	-4.9	9.58e-07	0.917364	T	C	-0.0268061	0.00494686	5.99934e-08	T	C	-0.0241388	0.0093308	0.009686	T	C	-0.015	0.004	0.0003597
1	6	rs2420551	rs57003411	C	G	69351540	4.933	8.11e-07	0.917364	C	G	0.0305909	0.0050952	1.92681e-09	C	G	0.0389084	0.0102769	0.000153	C	G	0.015	0.004	0.0003941
1	6	rs2420551	rs61649525	T	C	69351782	4.929	8.26e-07	0.917364	T	C	0.0305535	0.00509543	2.01909e-09	T	C	0.0388408	0.0102753	0.0001566	T	C	0.015	0.004	0.000404
1	6	rs2420551	rs4344368	T	C	69352300	-5.01	5.44e-07	0.916525	T	C	-0.0280109	0.00503391	2.62987e-08	T	C	-0.027009	0.00932954	0.003789	T	C	-0.015	0.004	0.0004019
1	6	rs2420551	rs72680472	C	G	69352545	4.933	8.11e-07	0.917364	C	G	0.030675	0.00509633	1.75442e-09	C	G	0.0392652	0.0102896	0.0001358	C	G	0.015	0.004	0.0004323
1	6	rs2420551	rs9436854	T	C	69354053	-4.975	6.53e-07	0.917364	T	C	-0.0302315	0.00506762	2.43695e-09	T	C	-0.0392545	0.0102895	0.000136	T	C	-0.014	0.004	0.0009256
1	6	rs2420551	rs9436855	T	C	69354204	-4.957	7.15e-07	0.917364	T	C	-0.030145	0.00506674	2.68812e-09	T	C	-0.0392545	0.0102895	0.000136	T	C	-0.014	0.004	0.0009499
1	6	rs2420551	rs9436417	T	C	69354742	-5.001	5.72e-07	0.917364	T	C	-0.02859	0.0048189	2.9765e-09	T	C	-0.0312292	0.00855595	0.000262	T	C	-0.014	0.004	0.0009799
1	6	rs2420551	rs28599531	T	C	69355011	-4.957	7.17e-07	0.917364	T	C	-0.0307581	0.00509655	1.58876e-09	T	C	-0.0392549	0.0102896	0.0001364	T	C	-0.015	0.004	0.0004104
1	6	rs2420551	rs72680475	A	G	69355291	4.955	7.24e-07	0.917364	A	G	0.0303446	0.00514923	3.79148e-09	A	G	0.0399567	0.0103973	0.0001213	A	G	0.014	0.004	0.0005851
1	6	rs2420551	rs58102432	T	C	69355305	4.946	7.56e-07	0.917364	T	C	0.0302916	0.00514981	4.05165e-09	T	C	0.0397234	0.0104015	0.0001339	T	C	0.014	0.004	0.0005748
1	6	rs2420551	rs6588341	A	G	69356272	-4.969	6.73e-07	0.928027	A	G	-0.0273219	0.00480576	1.30636e-08	A	G	-0.0298933	0.00863718	0.0005384	A	G	-0.013	0.004	0.001513
1	6	rs2420551	rs11801354	T	C	69357436	-4.963	6.96e-07	0.917364	T	C	-0.0303052	0.00515065	4.01053e-09	T	C	-0.0397133	0.0104016	0.0001347	T	C	-0.014	0.004	0.0006714
1	6	rs2420551	rs11801756	T	C	69358156	-4.98	6.36e-07	0.917364	T	C	-0.0273534	0.00502317	5.16763e-08	T	C	-0.02714	0.00944328	0.004051	T	C	-0.014	0.004	0.0007186
1	6	rs2420551	rs11803723	A	T	69359009	-4.973	6.58e-07	0.917364	A	T	-0.0273419	0.00502342	5.24232e-08	A	T	-0.0270057	0.00942937	0.004189	A	T	-0.014	0.004	0.0007093
1	6	rs2420551	rs60344420	A	T	69359401	4.977	6.45e-07	0.917364	A	T	0.0303509	0.00515103	3.8109e-09	A	T	0.0397133	0.0104016	0.0001347	A	T	0.014	0.004	0.0007033
1	6	rs2420551	rs7415447	A	G	69359499	NA	NA	0.917364	A	G	0.035321	0.00758906	3.2524e-06	A	G	0.0397133	0.0104016	0.0001347	A	G	0.014	0.004	0.0007685
1	6	rs2420551	rs147399966	C	A	69359690	NA	NA	0.927139	A	C	-0.0352473	0.00759557	3.47558e-06	A	C	-0.0395288	0.0104105	0.0001463	A	C	-0.014	0.004	0.0006749
1	6	rs2420551	rs10889791	T	C	69359943	-4.804	1.56e-06	0.928027	T	C	-0.0278582	0.00505621	3.59445e-08	T	C	-0.0398112	0.0103946	0.0001282	T	C	-0.01	0.004	0.0118
1	6	rs2420551	rs115874825	T	C	69360472	-5.074	3.89e-07	0.906753	T	C	-0.0306621	0.0052218	4.30718e-09	T	C	-0.0395293	0.0104107	0.0001465	T	C	-0.014	0.004	0.0006761
1	6	rs2420551	rs75630536	A	T	69360987	5.067	4.05e-07	0.917364	NA	NA	NA	NA	NA	A	T	0.0394994	0.0104028	0.0001462	NA	NA	NA	NA	NA
1	6	rs2420551	rs145319697	A	G	69361185	NA	NA	0.907751	A	G	0.0281085	0.0075505	0.000197084	A	G	0.0394494	0.0103487	0.0001377	A	G	0.01	0.005	0.06289
1	6	rs2420551	rs143372870	A	G	69361377	5.081	3.76e-07	0.906753	A	G	0.030631	0.00522025	4.41822e-09	A	G	0.0393599	0.0104072	0.0001555	A	G	0.014	0.004	0.0007402
1	6	rs2420551	rs145755345	A	G	69361508	5.078	3.81e-07	0.916525	A	G	0.0306988	0.00522204	4.13515e-09	A	G	0.0395089	0.0104108	0.0001474	A	G	0.014	0.004	0.0006448
1	6	rs2420551	rs58913091	A	G	69361670	NA	NA	0.927139	NA	NA	NA	NA	NA	A	G	0.039704	0.0104347	0.0001417	NA	NA	NA	NA	NA
1	6	rs2420551	rs72680478	A	T	69362524	5.095	3.49e-07	0.916525	A	T	0.030745	0.00522241	3.92949e-09	A	T	0.0394995	0.010411	0.0001484	A	T	0.014	0.004	0.0006459
1	6	rs2420551	rs4617455	A	G	69363282	5.023	5.07e-07	0.917364	A	G	0.0287847	0.00488282	3.74454e-09	A	G	0.0317733	0.0086458	0.0002375	A	G	0.014	0.004	0.0006486
1	6	rs2420551	rs11802913	A	G	69364823	4.997	5.82e-07	0.917364	A	G	0.0302813	0.00513261	3.63954e-09	A	G	0.0396014	0.0103995	0.0001403	A	G	0.014	0.004	0.0005882
1	6	rs2420551	rs9436418	T	C	69364885	4.963	6.96e-07	0.928027	T	C	0.0294348	0.00506542	6.21296e-09	T	C	0.0398705	0.0103938	0.0001249	T	C	0.013	0.004	0.001282
1	6	rs2420551	rs11806894	A	T	69366071	-5.019	5.2e-07	0.917364	A	T	-0.0273452	0.00503111	5.47274e-08	A	T	-0.0275097	0.0094373	0.00356	A	T	-0.014	0.004	0.0008199
1	6	rs2420551	rs72680481	A	G	69366902	5.11	3.22e-07	0.916525	A	G	0.0309929	0.00522184	2.9341e-09	A	G	0.0398977	0.0104172	0.0001283	A	G	0.014	0.004	0.0009124
1	6	rs2420551	rs11582908	A	G	69367409	-5.019	5.19e-07	0.917364	A	G	-0.0272852	0.00500516	4.99733e-08	A	G	-0.0263904	0.00943526	0.005156	A	G	-0.014	0.004	0.0009109
1	6	rs2420551	rs72680485	T	G	69369267	5.116	3.12e-07	0.916525	T	G	0.0309237	0.0052228	3.20194e-09	T	G	0.0401249	0.0104166	0.0001171	T	G	0.014	0.004	0.001005
1	6	rs2420551	rs11809118	T	C	69369473	4.998	5.79e-07	0.917364	T	C	0.0271914	0.00500595	5.57827e-08	T	C	0.026482	0.00944101	0.005028	T	C	0.014	0.004	0.000916
1	6	rs2420551	rs7551318	T	G	69369837	-4.922	8.56e-07	0.928027	T	G	-0.0269196	0.00498687	6.73509e-08	T	G	-0.0295809	0.00982429	0.002608	T	G	-0.013	0.004	0.001658
1	6	rs2420551	rs72680486	A	G	69371516	-5.084	3.69e-07	0.927139	A	G	-0.0307037	0.00513369	2.22017e-09	A	G	-0.0398945	0.0104109	0.000127	A	G	-0.014	0.004	0.0008095
1	6	rs2420551	rs72680487	A	T	69371555	-5.106	3.3e-07	0.916525	A	T	-0.0309443	0.00522332	3.13685e-09	A	T	-0.0399622	0.0104204	0.0001256	A	T	-0.014	0.004	0.0007916
1	6	rs2420551	rs6658623	T	C	69377135	5.425	5.8e-08	0.957868	T	C	0.0269329	0.00494729	5.21076e-08	T	C	0.0268218	0.00949109	0.004708	T	C	0.013	0.004	0.001914
1	6	rs2420551	rs58815715	A	G	69378002	5.311	1.09e-07	0.947197	A	G	0.0304611	0.0051121	2.54369e-09	A	G	0.0398842	0.0104381	0.0001329	A	G	0.013	0.004	0.00186
1	6	rs2420551	rs72680492	C	G	69378459	-5.352	8.68e-08	0.936579	C	G	-0.0309702	0.00521749	2.92351e-09	C	G	-0.0402827	0.010444	0.0001147	C	G	-0.013	0.004	0.001595
1	6	rs2420551	rs6662460	A	C	69378487	5.323	1.02e-07	0.936579	A	C	0.0304589	0.00514453	3.20683e-09	A	C	0.0401657	0.0104354	0.0001186	A	C	0.013	0.004	0.001523
1	6	rs2420551	rs6662550	T	C	69378554	5.316	1.06e-07	0.947197	T	C	0.0305952	0.00510783	2.1003e-09	T	C	0.0401966	0.0104298	0.0001163	T	C	0.013	0.004	0.001988
1	6	rs2420551	rs72680493	C	G	69379658	5.318	1.05e-07	0.936579	C	G	0.0304682	0.00514462	3.17408e-09	C	G	0.0401671	0.0104357	0.0001186	C	G	0.013	0.004	0.001811
1	6	rs2420551	rs9804111	A	G	69379892	5.384	7.27e-08	0.936579	A	G	0.0282078	0.00508835	2.96311e-08	A	G	0.0284502	0.00946133	0.00264	A	G	0.013	0.004	0.001615
1	6	rs2420551	rs4328112	A	G	69380983	-5.369	7.9e-08	0.936579	A	G	-0.0309307	0.00521751	3.06198e-09	A	G	-0.0400157	0.0104371	0.000126	A	G	-0.013	0.004	0.001621
1	6	rs2420551	rs4539178	C	G	69381135	5.323	1.02e-07	0.947197	C	G	0.0305622	0.00511169	2.24676e-09	C	G	0.0400746	0.0104334	0.0001224	C	G	0.013	0.004	0.001998
1	6	rs2420551	rs56026859	A	G	69382976	5.345	9.06e-08	0.947197	A	G	0.0304802	0.00514446	3.12556e-09	A	G	0.0401975	0.0104355	0.0001169	A	G	0.013	0.004	0.001955
1	6	rs2420551	rs72680496	T	C	69383918	-5.321	1.03e-07	0.947197	T	C	-0.0305232	0.00511383	2.39074e-09	T	C	-0.0400746	0.0104334	0.0001224	T	C	-0.013	0.004	0.001899
1	6	rs2420551	rs4420133	C	G	69384518	5.295	1.19e-07	0.947197	C	G	0.0272558	0.00498399	4.53448e-08	C	G	0.0264276	0.0094553	0.005184	C	G	0.013	0.004	0.001922
1	6	rs2420551	rs10127680	T	C	69386730	5.359	8.38e-08	0.957489	T	C	0.0290707	0.00488534	2.67148e-09	T	C	0.0327273	0.00867637	0.0001622	T	C	0.013	0.004	0.002009
1	6	rs2420551	rs9629020	A	T	69387823	-5.381	7.4e-08	0.957489	A	T	-0.0291084	0.00488532	2.54817e-09	A	T	-0.0328487	0.00867637	0.0001531	A	T	-0.013	0.004	0.002333
1	6	rs2420551	rs9629013	A	G	69388905	-5.334	9.6e-08	0.957489	A	G	-0.0273954	0.00498701	3.94363e-08	A	G	-0.0267736	0.00945728	0.004633	A	G	-0.013	0.004	0.002095
1	6	rs2420551	rs6682095	C	G	69389242	5.414	6.18e-08	0.946871	C	G	0.0309815	0.0052194	2.92351e-09	C	G	0.040125	0.0104383	0.0001213	C	G	0.013	0.004	0.00174
1	6	rs2420551	rs6682255	C	G	69389574	-5.291	1.22e-07	0.957489	C	G	-0.0305327	0.00510965	2.29378e-09	C	G	-0.0402845	0.0104229	0.0001109	C	G	-0.013	0.004	0.001569
1	6	rs2420551	rs561165501	C	G	69391778	NA	NA	0.838583	NA	NA	NA	NA	NA	C	G	0.0290754	0.00976012	0.002895	NA	NA	NA	NA	NA
1	6	rs2420551	rs74883477	G	C	69392237	NA	NA	0.947197	C	G	-0.0315046	0.00756207	3.09802e-05	C	G	-0.04066	0.0103645	8.742e-05	C	G	-0.013	0.005	0.00588
1	6	rs2420551	rs138359697	T	A	69392476	NA	NA	0.957489	A	T	-0.0343978	0.00761373	6.24657e-06	A	T	-0.0401345	0.0104354	0.0001199	A	T	-0.013	0.004	0.002222
1	6	rs2420551	rs200715280	C	T	69392898	NA	NA	0.946871	NA	NA	NA	NA	NA	T	C	-0.0399528	0.010437	0.0001292	NA	NA	NA	NA	NA
1	6	rs2420551	rs572166228	C	A	69394642	NA	NA	0.946871	NA	NA	NA	NA	NA	A	C	-0.0399528	0.010437	0.0001292	NA	NA	NA	NA	NA
1	6	rs2420551	rs72680499	T	C	69395485	-5.33	9.82e-08	0.957489	T	C	-0.0305665	0.00511385	2.27015e-09	T	C	-0.0402156	0.0104321	0.0001156	T	C	-0.013	0.004	0.002002
1	6	rs2420551	rs6662842	T	G	69399775	-5.341	9.26e-08	0.978618	T	G	-0.030554	0.00511321	2.29378e-09	T	G	-0.0406143	0.0104919	0.0001085	T	G	-0.013	0.004	0.002102
1	6	rs2420551	rs9803974	T	G	69400432	5.353	8.66e-08	0.968006	T	G	0.0302948	0.00497237	1.1107e-09	T	G	0.0335918	0.00868005	0.0001091	T	G	0.014	0.004	0.001327
1	6	rs2420551	rs72682206	A	C	69400780	-5.412	6.24e-08	0.968006	A	C	-0.0309224	0.00521984	3.14165e-09	A	C	-0.0400262	0.0104398	0.0001262	A	C	-0.013	0.004	0.001476
1	6	rs2420551	rs6690346	T	C	69402457	5.317	1.05e-07	0.978618	T	C	0.0271717	0.00502971	6.58153e-08	T	C	0.0267818	0.00949035	0.004772	T	C	0.013	0.004	0.001997
1	6	rs2420551	rs11801267	A	G	69403245	-5.327	9.99e-08	0.978618	A	G	-0.0272715	0.00498377	4.44815e-08	A	G	-0.0265491	0.00946156	0.005012	A	G	-0.013	0.004	0.001848
1	6	rs2420551	rs72682209	A	G	69403582	-5.413	6.2e-08	0.968006	A	G	-0.0311547	0.00522924	2.55686e-09	A	G	-0.0409579	0.0104725	9.21e-05	A	G	-0.013	0.004	0.001829
1	6	rs2420551	rs72682210	A	T	69403584	-5.427	5.72e-08	0.968006	A	T	-0.0310716	0.00522788	2.79115e-09	A	T	-0.0408495	0.0104716	9.589e-05	A	T	-0.013	0.004	0.001779
1	6	rs2420551	rs11578193	T	G	69406043	-5.321	1.03e-07	0.978618	T	G	-0.0287934	0.00485908	3.10966e-09	T	G	-0.0318231	0.00867352	0.0002438	T	G	-0.013	0.004	0.001686
1	6	rs2420551	rs72682214	T	C	69406872	-5.325	1.01e-07	0.978618	T	C	-0.0305434	0.0051136	2.32969e-09	T	C	-0.0402891	0.0104349	0.0001129	T	C	-0.013	0.004	0.001796
1	6	rs2420551	rs4317857	T	C	69408578	5.408	6.38e-08	0.968006	T	C	0.0301716	0.00496334	1.21018e-09	T	C	0.0332973	0.00867794	0.0001244	T	C	0.014	0.004	0.001446
1	6	rs2420551	rs72682215	T	C	69409730	-5.351	8.74e-08	0.978618	T	C	-0.0304323	0.00513857	3.17408e-09	T	C	-0.0402075	0.0104381	0.0001169	T	C	-0.013	0.004	0.001848
1	6	rs2420551	rs10047248	T	G	69410530	5.353	8.67e-08	0.978618	T	G	0.0295738	0.00493693	2.09423e-09	T	G	0.0348633	0.00897614	0.0001026	T	G	0.013	0.004	0.001812
1	6	rs2420551	rs11209370	A	G	69411095	5.334	9.6e-08	0.978618	A	G	0.0289501	0.00486295	2.62974e-09	A	G	0.0322642	0.00867318	0.0001995	A	G	0.013	0.004	0.001918
1	6	rs2420551	rs72682218	A	C	69411330	5.395	6.86e-08	0.968006	A	C	0.0309382	0.00521952	3.07776e-09	A	C	0.0400363	0.0104397	0.0001254	A	C	0.013	0.004	0.001512
1	6	rs2420551	rs4390220	A	C	69412517	5.349	8.85e-08	0.978618	A	C	0.0304444	0.0051384	3.12556e-09	A	C	0.0402718	0.0104412	0.0001147	A	C	0.013	0.004	0.001895
1	6	rs2420551	rs6658033	T	C	69412689	5.365	8.1e-08	0.978618	T	C	0.0280826	0.00506539	2.95609e-08	T	C	0.0298948	0.00985325	0.002413	T	C	0.013	0.004	0.002156
1	6	rs2420551	rs6658121	T	C	69412716	5.349	8.85e-08	0.978618	T	C	0.030493	0.00513783	2.93859e-09	T	C	0.0404705	0.0104359	0.0001055	T	C	0.013	0.004	0.002186
1	6	rs2420551	rs10047054	T	C	69412732	5.408	6.37e-08	0.968006	T	C	0.0308788	0.00521693	3.23991e-09	T	C	0.0399229	0.0104374	0.0001307	T	C	0.013	0.004	0.001783
1	6	rs2420551	rs6673849	T	C	69413111	-5.352	8.71e-08	0.978618	T	C	-0.0289729	0.00486187	2.53481e-09	T	C	-0.0323251	0.00867321	0.0001941	T	C	-0.013	0.004	0.002161
1	6	rs2420551	rs11804299	A	G	69415213	-5.334	9.61e-08	0.978618	A	G	-0.0281435	0.00503783	2.31777e-08	A	G	-0.0298821	0.00985233	0.002418	A	G	-0.013	0.004	0.001944
1	6	rs2420551	rs4484966	A	G	69415465	5.365	8.09e-08	0.978618	A	G	0.029121	0.00488602	2.52153e-09	A	G	0.0330784	0.00867744	0.000138	A	G	0.013	0.004	0.002072
1	6	rs2420551	rs72682221	T	C	69415479	-3.66	0.0002522	0.620092	T	C	-0.0266103	0.00665663	6.39962e-05	T	C	-0.0312847	0.0132675	0.01835	T	C	-0.01	0.005	0.05528
1	6	rs2420551	rs9436863	A	C	69416180	-5.416	6.08e-08	0.989283	A	C	-0.0278473	0.00499922	2.54276e-08	A	C	-0.0292932	0.00987301	0.003012	A	C	-0.013	0.004	0.001617
1	6	rs2420551	rs11802814	A	G	69417310	-5.333	9.66e-08	0.978618	A	G	-0.0289238	0.00486205	2.69966e-09	A	G	-0.0320773	0.00866719	0.0002145	A	G	-0.013	0.004	0.002048
1	6	rs2420551	rs72682222	A	G	69418123	-5.248	1.54e-07	0.978618	A	G	-0.0310121	0.0051131	1.31772e-09	A	G	-0.0399666	0.0104324	0.0001274	A	G	-0.014	0.004	0.001071
1	6	rs2420551	rs13375505	T	C	69419136	5.35	8.79e-08	0.978618	T	C	0.0291459	0.00489797	2.67148e-09	T	C	0.0329096	0.00867639	0.0001489	T	C	0.013	0.004	0.002418
1	6	rs2420551	rs4301671	A	T	69420375	-5.286	1.25e-07	0.989283	A	T	-0.0286567	0.00500009	9.96985e-09	A	T	-0.0314022	0.00984703	0.001428	A	T	-0.014	0.004	0.001336
1	6	rs2420551	rs1396022	A	G	69421826	-5.298	1.17e-07	0.989283	A	G	-0.0292573	0.00485478	1.67548e-09	A	G	-0.0323496	0.00867049	0.0001904	A	G	-0.014	0.004	0.0009128
1	6	rs2420551	rs1507858	T	C	69422680	5.217	1.82e-07	0.989283	T	C	0.0287078	0.00480397	2.28914e-09	T	C	0.0317702	0.00867091	0.0002487	T	C	0.014	0.004	0.000928
1	6	rs2420551	rs12087596	T	C	69423415	-5.34	9.31e-08	0.989283	T	C	-0.0288235	0.0048522	2.84497e-09	T	C	-0.0323661	0.00867027	0.000189	T	C	-0.013	0.004	0.001783
1	6	rs2420551	rs4649904	A	G	69423725	-5.334	9.59e-08	0.989283	A	G	-0.0287969	0.00485263	2.95119e-09	A	G	-0.0323165	0.00867323	0.0001946	A	G	-0.013	0.004	0.001689
1	6	rs2420551	rs1507855	A	G	69424337	-5.357	8.44e-08	0.989283	A	G	-0.028801	0.00485262	2.93578e-09	A	G	-0.03238	0.00867168	0.0001881	A	G	-0.013	0.004	0.001755
1	6	rs2420551	rs72682227	C	G	69424711	5.477	4.32e-08	0.978618	C	G	0.0310139	0.0052093	2.62371e-09	C	G	0.0399051	0.0104491	0.0001339	C	G	0.013	0.004	0.001963
1	6	rs2420551	rs72682228	T	G	69424724	5.446	5.16e-08	0.978618	T	G	0.0308342	0.00518942	2.82005e-09	T	G	0.0397979	0.0104319	0.000136	T	G	0.013	0.004	0.002013
1	6	rs2420551	rs9436866	A	C	69427576	-5.533	3.14e-08	0.968006	A	C	-0.0307298	0.00493388	4.7145e-10	A	C	-0.0341069	0.0086764	8.462e-05	A	C	-0.014	0.004	0.00113
1	6	rs2420551	rs7547769	A	G	69428547	5.544	2.97e-08	0.978618	A	G	0.0287337	0.0050498	1.26981e-08	A	G	0.0292666	0.0094622	0.001981	A	G	0.013	0.004	0.001925
1	6	rs2420551	rs9436422	T	C	69430200	4.749	2.04e-06	0.772465	T	C	0.0308083	0.0057421	8.0798e-08	T	C	0.0372813	0.0116613	0.001387	T	C	0.014	0.005	0.00303
1	6	rs2420551	rs994176	T	C	69430915	-4.645	3.4e-06	0.762654	T	C	-0.030848	0.00576616	8.80321e-08	T	C	-0.0370393	0.0116586	0.001487	T	C	-0.015	0.005	0.001238
1	6	rs2420551	rs9436423	C	G	69431150	-4.633	3.61e-06	0.762654	C	G	-0.028158	0.00562337	5.51947e-07	C	G	-0.0259452	0.0105726	0.01411	C	G	-0.015	0.005	0.001345
1	6	rs2420551	rs13375469	A	G	69431362	-4.625	3.74e-06	0.772465	A	G	-0.0290638	0.00539828	7.28881e-08	A	G	-0.0319032	0.00968818	0.0009898	A	G	-0.014	0.005	0.003886
1	6	rs2420551	rs1022013	A	G	69432044	-5.428	5.71e-08	0.989283	A	G	-0.0290279	0.00481765	1.68769e-09	A	G	-0.0327742	0.00870034	0.0001654	A	G	-0.013	0.004	0.001945
1	6	rs2420551	rs116109100	A	G	69432704	4.649	3.34e-06	0.772465	A	G	0.0299991	0.00575108	1.82579e-07	A	G	0.0376326	0.0116618	0.001252	A	G	0.013	0.005	0.004355
1	6	rs2420551	rs193089622	T	C	69432745	NA	NA	0.772465	T	C	0.032469	0.00850784	0.000135437	T	C	0.0372813	0.0116613	0.001387	T	C	0.014	0.005	0.003947
1	6	rs2420551	rs184377319	C	A	69432747	NA	NA	0.772465	A	C	-0.0314167	0.00850784	0.000221902	A	C	-0.0372813	0.0116613	0.001387	A	C	-0.013	0.005	0.004834
1	6	rs2420551	rs114927020	A	G	69432836	4.664	3.1e-06	0.772465	A	G	0.0303763	0.00575115	1.27935e-07	A	G	0.0373095	0.0116629	0.001381	A	G	0.014	0.005	0.003912
1	6	rs2420551	rs6669357	A	G	69433435	5.36	8.33e-08	0.989283	A	G	0.0305431	0.0050663	1.65306e-09	A	G	0.0403382	0.0104206	0.0001086	A	G	0.013	0.004	0.001964
1	6	rs2420551	rs4484967	A	G	69437856	5.556	2.75e-08	0.989283	A	G	0.0279594	0.00488903	1.07273e-08	A	G	0.0286139	0.00929023	0.002073	A	G	0.014	0.004	0.00107
1	6	rs2420551	rs4313445	T	C	69438130	4.588	4.48e-06	0.762654	T	C	0.0284546	0.00562616	4.24676e-07	T	C	0.0260332	0.0105697	0.01376	T	C	0.016	0.005	0.00095
1	6	rs2420551	rs2420551	A	T	69438777	-5.599	2.15e-08	1	A	T	-0.030818	0.00498196	6.17431e-10	A	T	-0.0420773	0.0102478	4.018e-05	A	T	-0.014	0.004	0.001122
1	7	rs67474621	rs11209896	A	G	72512988	5.541	3.02e-08	0.684241	A	G	0.0238849	0.00310573	1.46435e-14	A	G	0.0177958	0.00615134	0.003819	A	G	0.01	0.002	3.059e-05
1	7	rs67474621	rs12564163	T	G	72513121	-5.559	2.71e-08	0.684241	T	G	-0.0238693	0.00310574	1.52345e-14	T	G	-0.0175867	0.0061492	0.004231	T	G	-0.01	0.002	3.738e-05
1	7	rs34305371	rs6699175	T	C	72514896	4.97	6.7e-07	0.726125	T	C	0.038775	0.0049772	6.67315e-15	T	C	0.0402578	0.00970535	3.36e-05	T	C	0.028	0.004	1.387e-11
1	7	rs34305371	rs4348675	T	C	72515717	-5.477	4.32e-08	0.604649	T	C	-0.032175	0.00429167	6.5258e-14	T	C	-0.0238088	0.00728765	0.001088	T	C	-0.023	0.004	1.068e-09
1	7	rs67474621	rs975480	A	G	72517928	5.552	2.82e-08	0.684241	A	G	0.0238107	0.00295098	7.10285e-16	A	G	0.0176456	0.00511319	0.000558	A	G	0.011	0.002	1.511e-05
1	7	rs67474621	rs1486084	T	C	72520941	-5.545	2.95e-08	0.684241	T	C	-0.0238807	0.00295306	6.12656e-16	T	C	-0.018034	0.00511457	0.0004217	T	C	-0.011	0.002	1.647e-05
1	7	rs67474621	rs11209899	A	G	72522971	5.541	3e-08	0.684241	A	G	0.0239013	0.00295309	5.79063e-16	A	G	0.0180878	0.00511388	0.0004051	A	G	0.011	0.002	1.325e-05
1	7	rs67474621	rs12036443	T	G	72524862	-5.521	3.36e-08	0.684241	T	G	-0.024467	0.00310488	3.26932e-15	T	G	-0.0179554	0.00615123	0.003509	T	G	-0.011	0.002	1.728e-05
1	7	rs67474621	rs2821272	T	C	72525098	-5.522	3.35e-08	0.684241	T	C	-0.0244662	0.00310345	3.18215e-15	T	C	-0.0177569	0.00615063	0.003886	T	C	-0.011	0.002	1.429e-05
1	7	rs67474621	rs11209900	T	C	72529337	5.524	3.31e-08	0.684241	T	C	0.0245385	0.00310564	2.76071e-15	T	C	0.0181528	0.0061514	0.003171	T	C	0.011	0.002	1.381e-05
1	7	rs67474621	rs12131816	T	C	72529866	-5.525	3.29e-08	0.684241	T	C	-0.0241169	0.00302873	1.68318e-15	T	C	-0.0177872	0.00557594	0.001422	T	C	-0.011	0.002	1.254e-05
1	7	rs67474621	rs12408173	A	G	72531083	-5.531	3.18e-08	0.680234	A	G	-0.0245148	0.00310563	2.93414e-15	A	G	-0.0180785	0.00615124	0.003293	A	G	-0.011	0.002	1.58e-05
1	7	rs67474621	rs12132044	A	G	72533676	5.564	2.64e-08	0.687283	A	G	0.0243942	0.00310562	4.00247e-15	A	G	0.0180541	0.00615132	0.003339	A	G	0.011	0.002	1.602e-05
1	7	rs67474621	rs2630381	T	C	72533775	-5.514	3.51e-08	0.684241	T	C	-0.0243131	0.00310263	4.64079e-15	T	C	-0.017812	0.00615056	0.003784	T	C	-0.011	0.002	1.602e-05
1	7	rs67474621	rs2220252	A	G	72534543	5.525	3.3e-08	0.684241	A	G	0.0244546	0.00310564	3.42756e-15	A	G	0.0183127	0.0061514	0.002914	A	G	0.011	0.002	1.701e-05
1	7	rs67474621	rs2821266	T	C	72535285	5.51	3.58e-08	0.684241	T	C	0.0244316	0.00310338	3.47414e-15	T	C	0.0181639	0.00615099	0.003145	T	C	0.011	0.002	1.725e-05
1	7	rs67474621	rs2200484	A	T	72536341	5.527	3.26e-08	0.684241	A	T	0.0238277	0.00295308	7.10291e-16	A	T	0.0182292	0.00511338	0.0003639	A	T	0.011	0.002	1.807e-05
1	7	rs67474621	rs12409966	T	C	72539545	5.509	3.62e-08	0.684241	T	C	0.023828	0.00295312	7.10291e-16	T	C	0.0182969	0.00511373	0.0003459	T	C	0.011	0.002	1.642e-05
1	7	rs67474621	rs2422135	T	C	72540398	-5.508	3.62e-08	0.684241	T	C	-0.024444	0.00310562	3.52134e-15	T	C	-0.0183063	0.00615131	0.002921	T	C	-0.011	0.002	1.832e-05
1	7	rs67474621	rs11209905	T	C	72540875	-5.607	2.06e-08	0.684241	T	C	-0.0243212	0.00306183	1.96788e-15	T	C	-0.0185209	0.00580955	0.001431	T	C	-0.011	0.002	1.757e-05
1	7	rs67474621	rs12049085	T	C	72542738	5.508	3.64e-08	0.684241	T	C	0.0244726	0.00310559	3.26932e-15	T	C	0.0184802	0.00615185	0.002666	T	C	0.011	0.002	2.02e-05
1	7	rs1620977	rs7542974	A	G	72544704	5.921	3.21e-09	0.632498	A	G	0.0291471	0.00347636	5.10039e-17	A	G	0.0245555	0.00638136	0.0001193	A	G	0.019	0.003	1.355e-10
1	7	rs67474621	rs11209906	T	C	72545694	5.606	2.07e-08	0.684241	T	C	0.0238759	0.00295308	6.21364e-16	T	C	0.0184509	0.00511389	0.0003086	T	C	0.011	0.002	2.026e-05
1	7	rs67474621	rs12130387	C	G	72547396	5.639	1.71e-08	0.684241	C	G	0.0245078	0.00310574	2.99429e-15	C	G	0.0182885	0.00615153	0.002945	C	G	0.011	0.002	1.89e-05
1	7	rs67474621	rs2821260	T	C	72554093	-5.646	1.64e-08	0.684241	T	C	-0.0244349	0.00298188	2.5171e-16	T	C	-0.0196511	0.00529108	0.0002041	T	C	-0.011	0.002	1.893e-05
1	7	rs67474621	rs973526	T	C	72556393	-5.99	2.09e-09	0.758836	T	C	-0.0228166	0.00306817	1.03339e-13	T	C	-0.0146255	0.0060813	0.01619	T	C	-0.01	0.002	4.933e-05
1	7	rs67474621	rs12140090	T	C	72558138	-6.447	1.14e-10	0.934537	T	C	-0.0255269	0.00307923	1.13229e-16	T	C	-0.0183153	0.00610104	0.002684	T	C	-0.012	0.002	2.851e-06
1	7	rs67474621	rs727726	T	C	72559740	-6.575	4.88e-11	0.848177	T	C	-0.0232362	0.00299433	8.4885e-15	T	C	-0.0159684	0.00551584	0.003787	T	C	-0.009	0.002	0.0001451
1	7	rs77944304	rs77801296	T	C	72562125	6.217	5.08e-10	0.811682	T	C	0.0219893	0.00334151	4.68429e-11	T	C	0.020498	0.0065762	0.001825	T	C	0.008	0.003	0.001983
1	7	rs77944304	rs2016698	A	G	72562478	-6.057	1.39e-09	0.807395	A	G	-0.0223061	0.00334176	2.47331e-11	A	G	-0.0201065	0.0066031	0.002324	A	G	-0.009	0.003	0.001318
1	7	rs77944304	rs1817624	T	G	72562479	-6.1	1.06e-09	0.811682	NA	NA	NA	NA	NA	T	G	-0.0203613	0.00660437	0.002047	NA	NA	NA	NA	NA
1	7	rs67474621	rs2220253	T	C	72565460	-6.546	5.91e-11	0.858505	T	C	-0.0238095	0.00307085	8.94577e-15	T	C	-0.0172052	0.00608602	0.004693	T	C	-0.009	0.002	0.0001405
1	7	rs77944304	rs17588282	A	G	72567065	-6.221	4.94e-10	0.811682	A	G	-0.0206594	0.00317749	7.93602e-11	A	G	-0.016656	0.00546098	0.00229	A	G	-0.008	0.003	0.001739
1	7	rs77944304	rs10493493	T	G	72569309	-6.216	5.1e-10	0.811682	T	G	-0.0206399	0.003177	8.21271e-11	T	G	-0.0166544	0.00545868	0.002283	T	G	-0.008	0.003	0.001994
1	7	rs67474621	rs2630392	A	T	72569613	-6.53	6.57e-11	0.858505	A	T	-0.0234725	0.00291978	9.04775e-16	A	T	-0.0181278	0.0050594	0.0003401	A	T	-0.009	0.002	0.000179
1	7	rs77944304	rs11589787	A	G	72570425	-6.265	3.74e-10	0.81858	A	G	-0.0220112	0.00334141	4.4762e-11	A	G	-0.0205461	0.00656634	0.001755	A	G	-0.008	0.003	0.001737
1	7	rs67474621	rs1486091	T	C	72571364	-6.55	5.74e-11	0.858505	T	C	-0.0235075	0.00292008	8.25938e-16	T	C	-0.0181965	0.00506019	0.0003232	T	C	-0.009	0.002	0.0002037
1	7	rs67474621	rs1352082	A	C	72571656	6.444	1.16e-10	0.934537	A	C	0.0240815	0.00292814	1.96524e-16	A	C	0.0174547	0.00507257	0.0005789	A	C	0.011	0.002	4.52e-06
1	7	rs77944304	rs78851102	A	C	72572054	-6.225	4.82e-10	0.99432	A	C	-0.021515	0.00355485	1.42804e-09	A	C	-0.0248927	0.00697276	0.000357	A	C	-0.008	0.003	0.004385
1	7	rs67474621	rs1486093	T	C	72573363	-6.439	1.2e-10	0.934537	T	C	-0.0250772	0.00307941	3.84e-16	T	C	-0.0186947	0.00610139	0.002184	T	C	-0.011	0.002	4.247e-06
1	7	rs67474621	rs1486094	A	T	72573432	-6.464	1.02e-10	0.858505	A	T	-0.0239313	0.00306917	6.32468e-15	A	T	-0.0178013	0.00608593	0.003443	A	T	-0.009	0.002	0.0004172
1	7	rs67474621	rs1564970	T	C	72573798	-6.433	1.25e-10	0.934537	T	C	-0.0250489	0.00307945	4.146e-16	T	C	-0.018549	0.00610163	0.002363	T	C	-0.011	0.002	4.612e-06
1	7	rs77944304	rs56062633	T	C	72574617	-6.259	3.88e-10	0.81858	T	C	-0.0220014	0.00334163	4.57909e-11	T	C	-0.020542	0.00656714	0.001761	T	C	-0.008	0.003	0.001951
1	7	rs77944304	rs56248439	T	C	72574649	-6.259	3.87e-10	0.99432	T	C	-0.0214799	0.003555	1.52066e-09	T	C	-0.0247747	0.00697288	0.0003814	T	C	-0.008	0.003	0.004472
1	7	rs67474621	rs28485041	C	T	72576770	NA	NA	0.719596	NA	NA	NA	NA	NA	NA	NA	NA	NA	NA	NA	NA	NA	NA	NA
1	7	rs67474621	rs2630395	A	G	72577177	-6.443	1.17e-10	0.858505	A	G	-0.0238393	0.00306901	7.98878e-15	A	G	-0.0173861	0.00608333	0.004268	A	G	-0.009	0.002	0.0002702
1	7	rs67474621	rs2821246	A	T	72577179	-6.473	9.6e-11	0.855103	A	T	-0.0238527	0.00306906	7.72701e-15	A	T	-0.0175622	0.00608319	0.003885	A	T	-0.009	0.002	0.0002226
1	7	rs67474621	rs67474621	A	T	72577950	-7.192	6.37e-13	1	NA	NA	NA	NA	NA	A	T	-0.0170797	0.00609553	0.005077	NA	NA	NA	NA	NA
1	7	rs67474621	rs12402629	T	C	72578709	-6.428	1.29e-10	0.93437	T	C	-0.0249208	0.00307935	5.82783e-16	T	C	-0.0181078	0.00610102	0.002993	T	C	-0.011	0.002	6.105e-06
1	7	rs77944304	rs12124902	A	G	72579373	6.252	4.05e-10	0.822873	A	G	0.0211443	0.00326042	8.86442e-11	A	G	0.0177994	0.00595296	0.002794	A	G	0.008	0.003	0.002334
1	7	rs77944304	rs77944304	T	C	72582779	-6.299	2.99e-10	1	T	C	-0.0213265	0.00355244	1.93306e-09	T	C	-0.0238987	0.00697163	0.0006089	T	C	-0.008	0.003	0.002863
1	7	rs67474621	rs1385912	A	T	72583375	-6.074	1.25e-09	0.852444	A	T	-0.0238767	0.00351241	1.06227e-11	NA	NA	NA	NA	NA	A	T	-0.01	0.003	0.0008648
1	7	rs67474621	rs2630400	A	G	72583763	-6.547	5.88e-11	0.862892	A	G	-0.0235104	0.0029195	8.08731e-16	A	G	-0.0184256	0.00505921	0.0002705	A	G	-0.009	0.002	0.0001597
1	7	rs67474621	rs1486096	A	G	72584184	6.362	1.99e-10	0.941402	A	G	0.0236393	0.00292787	6.80882e-16	A	G	0.0162613	0.00507215	0.001348	A	G	0.011	0.002	4.036e-06
1	7	rs77944304	rs1486097	A	G	72584796	-6.241	4.34e-10	0.822873	A	G	-0.0211456	0.00326147	8.96512e-11	A	G	-0.0177725	0.00595393	0.002835	A	G	-0.008	0.003	0.002272
1	7	rs77944304	rs7549778	C	G	72585353	-6.24	4.36e-10	0.81994	C	G	-0.021118	0.0032615	9.48562e-11	C	G	-0.0177115	0.00595345	0.002927	C	G	-0.008	0.003	0.002207
1	7	rs67474621	rs11209915	T	C	72586208	6.41	1.46e-10	0.941402	T	C	0.0254995	0.00307937	1.22416e-16	T	C	0.0183272	0.00610498	0.00268	T	C	0.012	0.002	3.017e-06
1	7	rs67474621	rs11209916	A	G	72586209	-6.455	1.08e-10	0.941402	A	G	-0.0255151	0.00307937	1.17317e-16	A	G	-0.0183943	0.00610497	0.00259	A	G	-0.012	0.002	2.512e-06
1	7	rs67474621	rs7556006	C	G	72587186	6.429	1.28e-10	0.941402	C	G	0.0238633	0.0029279	3.62947e-16	C	G	0.0169592	0.00507152	0.0008267	C	G	0.011	0.002	4.054e-06
1	7	rs1620977	rs12128707	A	G	72588119	-6.4	1.56e-10	0.773631	A	G	-0.0296532	0.00340896	3.36006e-18	A	G	-0.0256575	0.00625488	4.092e-05	A	G	-0.019	0.003	1.2e-10
1	7	rs114030538	rs114030538	T	C	72588658	5.686	1.3e-08	1	T	C	0.0258004	0.00642208	5.88319e-05	T	C	0.0313712	0.0124637	0.01184	T	C	0.014	0.005	0.004679
1	7	rs77944304	rs7517387	T	G	72589319	-6.256	3.95e-10	0.822873	T	G	-0.0211461	0.00326026	8.81449e-11	T	G	-0.0176513	0.00595321	0.003029	T	G	-0.008	0.003	0.001922
1	7	rs67474621	rs2821239	A	G	72590193	-6.575	4.85e-11	0.862892	A	G	-0.0236908	0.00291949	4.86954e-16	A	G	-0.0185272	0.0050593	0.0002505	A	G	-0.009	0.002	0.000205
1	7	rs67474621	rs2630406	A	G	72590865	-6.555	5.56e-11	0.862892	A	G	-0.0236607	0.00291949	5.30055e-16	A	G	-0.018451	0.00505923	0.0002651	A	G	-0.009	0.002	0.0001959
1	7	rs67474621	rs1385914	G	A	72591774	NA	NA	0.941402	NA	NA	NA	NA	NA	A	G	-0.0179608	0.00610083	0.003241	NA	NA	NA	NA	NA
1	7	rs67474621	rs4649954	T	G	72593174	6.635	3.24e-11	0.869862	T	G	0.0250189	0.00307927	4.476e-16	T	G	0.0182738	0.0061096	0.002785	T	G	0.011	0.002	9.799e-06
1	7	rs67474621	rs12141628	T	C	72593767	6.437	1.22e-10	0.941402	T	C	0.0244979	0.00300303	3.41398e-16	T	C	0.0175364	0.00553024	0.001522	T	C	0.011	0.002	4.499e-06
1	7	rs67474621	rs12132602	A	G	72597051	-6.367	1.93e-10	0.941402	A	G	-0.0248966	0.00307926	6.20282e-16	A	G	-0.017821	0.00610099	0.003484	A	G	-0.011	0.002	6.074e-06
1	7	rs67474621	rs12750634	A	T	72597654	6.331	2.43e-10	0.941402	A	T	0.0255063	0.00307926	1.1984e-16	A	T	0.0178057	0.00610203	0.003524	A	T	0.012	0.002	2.816e-06
1	7	rs77944304	rs7413319	A	T	72599191	-6.189	6.05e-10	0.827192	A	T	-0.0218657	0.00334201	6.04345e-11	A	T	-0.0201615	0.00656513	0.002135	A	T	-0.008	0.003	0.002718
1	7	rs77944304	rs4650129	A	G	72600038	-6.163	7.15e-10	0.822873	A	G	-0.0217931	0.00334214	6.99732e-11	A	G	-0.0198849	0.006567	0.002461	A	G	-0.008	0.003	0.003236
1	7	rs77944304	rs11583451	A	G	72602756	-6.182	6.34e-10	0.822873	A	G	-0.0217657	0.00334227	7.40213e-11	A	G	-0.0199769	0.00656702	0.002347	A	G	-0.008	0.003	0.002465
1	7	rs77944304	rs112877838	A	C	72603378	-6.174	6.68e-10	0.822873	A	C	-0.0217573	0.00334227	7.52798e-11	A	C	-0.0199552	0.00657068	0.00239	A	C	-0.008	0.003	0.002457
1	7	rs67474621	rs2630390	C	G	72603400	6.463	1.03e-10	0.862892	C	G	0.0238598	0.00306997	7.72701e-15	C	G	0.0172158	0.00608546	0.004669	C	G	0.009	0.002	0.0001748
1	7	rs77944304	rs1385921	T	C	72606298	6.186	6.18e-10	0.81858	T	C	0.0218024	0.00334182	6.84153e-11	T	C	0.0201271	0.00656676	0.002175	T	C	0.008	0.003	0.002375
1	7	rs77944304	rs1385920	A	T	72606383	-6.169	6.87e-10	0.822873	A	T	-0.0217684	0.00334223	7.36064e-11	A	T	-0.0200242	0.00656746	0.002293	A	T	-0.008	0.003	0.003169
1	7	rs77944304	rs12137663	A	G	72607638	6.19	6e-10	0.822873	A	G	0.0217941	0.00334186	6.95805e-11	A	G	0.0201282	0.00656711	0.002174	A	G	0.008	0.003	0.00237
1	7	rs77944304	rs12139652	A	G	72609333	6.192	5.96e-10	0.822873	A	G	0.0217525	0.00334283	7.65591e-11	A	G	0.0200973	0.00656776	0.00221	A	G	0.008	0.003	0.002305
1	7	rs77944304	rs76865614	A	G	72609647	-6.175	6.6e-10	0.822873	A	G	-0.0217431	0.00334182	7.69903e-11	A	G	-0.0199497	0.00656672	0.002385	A	G	-0.008	0.003	0.002712
1	7	rs67474621	rs57316908	C	G	72609955	6.362	1.99e-10	0.941402	C	G	0.0254933	0.00307926	1.24164e-16	C	G	0.0179527	0.00610221	0.003264	C	G	0.012	0.002	2.78e-06
1	7	rs67474621	rs11209920	A	T	72610802	-6.398	1.57e-10	0.941402	A	T	-0.0255765	0.00307926	9.89349e-17	A	T	-0.0183156	0.00610114	0.002678	A	T	-0.012	0.002	3.253e-06
1	7	rs67474621	rs12133604	T	G	72610879	6.338	2.33e-10	0.941402	T	G	0.0256051	0.00307926	9.14889e-17	T	G	0.0184433	0.006101	0.002499	T	G	0.012	0.002	3.374e-06
1	7	rs77944304	rs74924535	A	G	72611772	-6.151	7.72e-10	0.822873	A	G	-0.0217065	0.00334227	8.32818e-11	A	G	-0.0198926	0.00656737	0.00245	A	G	-0.008	0.003	0.002482
1	7	rs77944304	rs75014666	A	G	72612001	-6.183	6.3e-10	0.822873	A	G	-0.0217342	0.00334261	7.9182e-11	A	G	-0.0199409	0.00656599	0.002388	A	G	-0.008	0.003	0.002503
1	7	rs77944304	rs11587829	T	C	72612227	6.167	6.98e-10	0.822873	T	C	0.0217333	0.00334249	7.9182e-11	T	C	0.0199023	0.00656626	0.002441	T	C	0.008	0.003	0.002544
1	7	rs67474621	rs11209921	T	C	72612371	6.388	1.69e-10	0.941402	T	C	0.0250002	0.00307921	4.69934e-16	T	C	0.0184491	0.0061009	0.002494	T	C	0.011	0.002	5.342e-06
1	7	rs77944304	rs11587895	T	C	72612615	6.237	4.45e-10	0.822873	T	C	0.0217209	0.00334318	8.18927e-11	T	C	0.0199992	0.00656788	0.002326	T	C	0.008	0.003	0.002646
1	7	rs77944304	rs55777234	T	C	72613020	6.173	6.7e-10	0.822873	T	C	0.0216486	0.0033416	9.26304e-11	T	C	0.0200078	0.00656639	0.002311	T	C	0.008	0.003	0.002559
1	7	rs67474621	rs7515320	T	G	72613608	6.4	1.56e-10	0.941402	T	G	0.0255584	0.00307927	1.03981e-16	T	G	0.0184429	0.00610086	0.002504	T	G	0.012	0.002	3.387e-06
1	7	rs77944304	rs12136617	C	G	72613706	-6.163	7.14e-10	0.822873	C	G	-0.0215806	0.00334198	1.06508e-10	C	G	-0.0199284	0.0065662	0.002406	C	G	-0.008	0.003	0.002338
1	7	rs67474621	rs7541218	T	C	72613917	6.421	1.35e-10	0.941402	T	C	0.0255821	0.00307931	9.7538e-17	T	C	0.0185533	0.00610106	0.002359	T	C	0.012	0.002	3.231e-06
1	7	rs67474621	rs7517923	T	G	72614077	6.439	1.21e-10	0.923583	T	G	0.0238705	0.00292816	3.57827e-16	T	G	0.0170035	0.00507566	0.000807	T	G	0.011	0.002	3.777e-06
1	7	rs1620977	rs11587434	A	G	72615118	6.399	1.56e-10	0.772002	A	G	0.0286482	0.00335267	1.2864e-17	A	G	0.0240065	0.00593633	5.262e-05	A	G	0.019	0.003	4.071e-11
1	7	rs77944304	rs11209923	A	G	72615198	5.804	6.46e-09	0.847185	A	G	0.020326	0.00344241	3.53536e-09	A	G	0.018767	0.00675803	0.005486	A	G	0.008	0.003	0.005314
1	7	rs17589603	rs79103491	C	G	72615624	-6.493	8.42e-11	0.976487	C	G	-0.0286778	0.00517777	3.04816e-08	C	G	-0.041002	0.0100618	4.592e-05	C	G	-0.011	0.004	0.009556
1	7	rs67474621	rs2422136	A	C	72618544	6.202	5.58e-10	0.77702	A	C	0.0229505	0.00291639	3.56091e-15	A	C	0.0160812	0.0050538	0.001462	A	C	0.011	0.002	6.238e-06
1	7	rs77944304	rs17589316	T	C	72619339	5.791	7e-09	0.847185	T	C	0.0197192	0.00335769	4.28381e-09	T	C	0.0171939	0.00612319	0.004985	T	C	0.008	0.003	0.005213
1	7	rs67474621	rs2422137	A	C	72619961	6.543	6.04e-11	0.902032	A	C	0.0224014	0.00293343	2.23086e-14	A	C	0.0168357	0.00507712	0.0009139	A	C	0.012	0.003	3.502e-06
1	7	rs34305371	rs12124523	T	C	72621463	5.382	7.37e-08	0.805693	T	C	0.0389399	0.00476068	2.85086e-16	T	C	0.0331799	0.00817037	4.887e-05	T	C	0.03	0.004	7.067e-13
1	7	rs67474621	rs12568918	T	C	72622654	NA	NA	0.734534	NA	NA	NA	NA	NA	T	C	-0.0167788	0.00608147	0.005804	NA	NA	NA	NA	NA
1	7	rs67474621	rs11209928	A	G	72627031	6.222	4.9e-10	0.771012	A	G	0.0234608	0.00291639	8.66243e-16	A	G	0.0155862	0.00505389	0.002042	A	G	0.012	0.002	2.975e-06
1	7	rs67474621	rs2821296	T	C	72629795	-6.174	6.68e-10	0.774169	T	C	-0.0231005	0.00294677	4.5319e-15	T	C	-0.0157096	0.00522956	0.002665	T	C	-0.011	0.002	5.495e-06
1	7	rs17589603	rs17589603	A	G	72632885	6.587	4.5e-11	1	A	G	0.0288686	0.00505645	1.13468e-08	A	G	0.039231	0.00928763	2.401e-05	A	G	0.011	0.004	0.006675
1	7	rs67474621	rs2630431	T	C	72634986	-6.115	9.67e-10	0.774169	T	C	-0.0228703	0.00291638	4.43401e-15	T	C	-0.0156064	0.0050539	0.002014	T	C	-0.011	0.002	4.81e-06
1	7	rs34305371	rs12134600	A	C	72635996	5.454	4.92e-08	0.628723	A	C	0.0326695	0.00442307	1.5112e-13	A	C	0.0261463	0.00797873	0.00105	A	C	0.022	0.004	2.882e-09
1	7	rs77944304	rs1486111	A	T	72637468	-5.842	5.16e-09	0.841741	A	T	-0.0191407	0.0032753	5.09776e-09	A	T	-0.0155028	0.00561899	0.005807	A	T	-0.008	0.003	0.004637
1	7	rs77944304	rs12126162	A	C	72638618	-5.782	7.39e-09	0.841741	A	C	-0.0191121	0.00327522	5.36743e-09	A	C	-0.0155746	0.00561855	0.005568	A	C	-0.008	0.003	0.003636
1	7	rs67474621	rs2821295	A	G	72639856	6.14	8.27e-10	0.774169	A	G	0.02272	0.00291639	6.67563e-15	A	G	0.0152932	0.00505393	0.002475	A	G	0.011	0.002	4.637e-06
1	7	rs77944304	rs12117225	T	C	72640353	5.886	3.97e-09	0.841741	T	C	0.01931	0.00327444	3.6973e-09	T	C	0.0153857	0.00561727	0.006171	T	C	0.008	0.003	0.005018
1	7	rs67474621	rs2821293	A	G	72642650	6.13	8.76e-10	0.774169	A	G	0.0226825	0.00291639	7.3916e-15	A	G	0.0152024	0.005054	0.002633	A	G	0.011	0.002	3.998e-06
1	7	rs67474621	rs11209932	A	G	72642877	-6.08	1.21e-09	0.774169	A	G	-0.0234751	0.00306704	1.94859e-14	A	G	-0.0150402	0.0060793	0.01334	A	G	-0.011	0.002	7.66e-06
1	7	rs67474621	rs12036585	T	C	72644116	6.108	1.01e-09	0.770701	T	C	0.0228027	0.00291638	5.33212e-15	T	C	0.0155314	0.00505415	0.002118	T	C	0.011	0.002	9.462e-06
1	7	rs67474621	rs6699731	A	G	72645734	6.099	1.07e-09	0.770701	A	G	0.0227927	0.00291638	5.47958e-15	A	G	0.0154447	0.0050539	0.002245	A	G	0.011	0.002	4.48e-06
1	7	rs77944304	rs79164782	A	G	72645779	5.83	5.56e-09	0.841741	A	G	0.0201347	0.00344596	5.12777e-09	A	G	0.0181555	0.00675932	0.007225	A	G	0.008	0.003	0.00488
1	7	rs67474621	rs6699841	G	A	72645850	NA	NA	0.761668	A	G	0.0220887	0.00402434	4.04743e-08	A	G	0.0152315	0.00505357	0.002581	A	G	0.012	0.002	2.825e-06
1	7	rs67474621	rs11209933	A	G	72647443	-6.131	8.76e-10	0.774169	A	G	-0.0228979	0.00291639	4.1124e-15	A	G	-0.0158487	0.0050538	0.001713	A	G	-0.011	0.002	3.582e-06
1	7	rs77944304	rs112312657	T	C	72647974	-5.851	4.89e-09	0.841741	T	C	-0.0201477	0.0034462	5.02483e-09	T	C	-0.0182505	0.00675946	0.00694	T	C	-0.008	0.003	0.00542
1	7	rs77944304	rs11209935	A	G	72650254	-5.605	2.09e-08	0.759003	A	G	-0.0184474	0.00318775	7.16698e-09	A	G	-0.014107	0.0055127	0.0105	A	G	-0.01	0.003	0.0002539
1	7	rs77944304	rs74824226	T	C	72650546	-5.866	4.48e-09	0.841741	T	C	-0.0201512	0.00344481	4.9239e-09	T	C	-0.0182707	0.00675941	0.006881	T	C	-0.008	0.003	0.00492
1	7	rs67474621	rs6668604	T	G	72650925	6.138	8.33e-10	0.770701	T	G	0.0234621	0.00306704	2.01361e-14	T	G	0.0149733	0.0060793	0.01378	T	G	0.011	0.002	4.7e-06
1	7	rs77944304	rs17524209	A	G	72653038	-5.865	4.5e-09	0.841741	A	G	-0.0191706	0.0032756	4.8413e-09	A	G	-0.0156343	0.00561981	0.005409	A	G	-0.008	0.003	0.00498
1	7	rs77944304	rs2298152	A	G	72654730	5.882	4.06e-09	0.841741	A	G	0.0191224	0.00327506	5.25802e-09	A	G	0.0155828	0.00561946	0.005558	A	G	0.008	0.003	0.005321
1	7	rs77944304	rs2298151	T	C	72655369	5.879	4.13e-09	0.841741	T	C	0.0191391	0.00327504	5.09776e-09	T	C	0.0156371	0.00561878	0.005393	T	C	0.008	0.003	0.005351
1	7	rs77944304	rs2153929	T	C	72658214	5.887	3.93e-09	0.837222	T	C	0.0191918	0.00327538	4.64521e-09	T	C	0.0155528	0.00561877	0.005648	T	C	0.008	0.003	0.005505
1	7	rs67474621	rs2821288	T	C	72661104	-6.179	6.46e-10	0.770701	T	C	-0.0229078	0.00291638	4.00124e-15	T	C	-0.0154953	0.00505391	0.002169	T	C	-0.011	0.002	5.392e-06
1	7	rs77944304	rs6656980	A	G	72661288	5.894	3.77e-09	0.841741	A	G	0.0198747	0.00335981	3.31021e-09	A	G	0.0172669	0.00612736	0.004825	A	G	0.008	0.003	0.005476
1	7	rs67474621	rs61765618	T	A	72662344	NA	NA	0.69154	A	T	0.0220997	0.00443894	6.40461e-07	A	T	0.0147185	0.00608452	0.01557	A	T	0.011	0.002	5.218e-06
1	7	rs67474621	rs61765619	T	A	72662345	NA	NA	0.69154	NA	NA	NA	NA	NA	A	T	0.0147185	0.00608452	0.01557	NA	NA	NA	NA	NA
1	7	rs67474621	rs61765620	G	T	72662347	NA	NA	0.69154	NA	NA	NA	NA	NA	T	G	0.0147185	0.00608452	0.01557	NA	NA	NA	NA	NA
1	7	rs77944304	rs7518919	A	G	72663249	5.886	3.95e-09	0.841741	A	G	0.0199148	0.00335981	3.07868e-09	A	G	0.0174078	0.00612736	0.004494	A	G	0.008	0.003	0.005134
1	7	rs77944304	rs7529364	C	G	72663405	-6.2	5.65e-10	0.913735	C	G	-0.0201387	0.00352924	1.15498e-08	C	G	-0.0203581	0.00692452	0.003286	C	G	-0.008	0.003	0.002682
1	7	rs77944304	rs12141242	T	C	72663576	-5.889	3.89e-09	0.841741	T	C	-0.0198347	0.00335981	3.55865e-09	T	C	-0.0171376	0.00612713	0.00516	T	C	-0.008	0.003	0.005353
1	7	rs77944304	rs1342874	T	C	72664938	-5.901	3.62e-09	0.841741	T	C	-0.0192496	0.00327422	4.12383e-09	T	C	-0.0156543	0.00561892	0.005344	T	C	-0.008	0.003	0.005495
1	7	rs67474621	rs2821285	T	C	72667196	-6.19	6e-10	0.776656	T	C	-0.0228602	0.00291638	4.55699e-15	T	C	-0.0154952	0.00505388	0.002173	T	C	-0.011	0.002	5.885e-06
1	7	rs77944304	rs1342863	A	C	72669563	-5.881	4.08e-09	0.841741	A	C	-0.0200078	0.00344716	6.46945e-09	A	C	-0.0181868	0.00676592	0.007187	A	C	-0.008	0.003	0.005018
1	7	rs77944304	rs7349073	T	C	72670841	-5.96	2.53e-09	0.836333	T	C	-0.0202889	0.0033597	1.55161e-09	T	C	-0.018738	0.00612752	0.002225	T	C	-0.008	0.003	0.005169
1	7	rs77944304	rs10493494	C	G	72670904	5.871	4.32e-09	0.841741	C	G	0.019245	0.00327583	4.23184e-09	C	G	0.0156059	0.00561971	0.005492	C	G	0.008	0.003	0.005087
1	7	rs67474621	rs2797540	A	G	72673194	-6.201	5.59e-10	0.785883	A	G	-0.022775	0.00291636	5.74737e-15	A	G	-0.0153384	0.00505383	0.002408	A	G	-0.011	0.002	8.466e-06
1	7	rs67474621	rs1858600	T	C	72674489	-6.226	4.79e-10	0.776656	T	C	-0.0228227	0.00291638	5.04882e-15	T	C	-0.0154194	0.00505389	0.002277	T	C	-0.011	0.002	5.53e-06
1	7	rs77944304	rs74653947	A	C	72676153	5.908	3.47e-09	0.841741	A	C	0.0201269	0.00344612	5.20633e-09	A	C	0.0178897	0.0067585	0.008116	A	C	0.008	0.003	0.005143
1	7	rs67474621	rs1194259	A	G	72681358	6.225	4.81e-10	0.776656	A	G	0.0235061	0.00306703	1.80084e-14	A	G	0.0149125	0.0060793	0.01416	A	G	0.011	0.002	3.516e-06
1	7	rs67474621	rs1675356	T	C	72683226	-6.22	4.97e-10	0.785883	T	C	-0.0228901	0.00291635	4.1978e-15	T	C	-0.0157327	0.00505387	0.00185	T	C	-0.011	0.002	7.448e-06
1	7	rs77944304	rs6698979	T	C	72683471	5.87	4.37e-09	0.841741	T	C	0.0198165	0.00335916	3.65171e-09	T	C	0.0173168	0.00612984	0.004724	T	C	0.008	0.003	0.005358
1	7	rs77944304	rs6659016	C	G	72683616	-5.894	3.77e-09	0.841741	C	G	-0.0201945	0.00344426	4.53954e-09	C	G	-0.0181115	0.0067555	0.007351	C	G	-0.008	0.003	0.004834
1	7	rs67474621	rs1194286	A	G	72688503	-6.122	9.23e-10	0.773488	A	G	-0.02271	0.00291638	6.85959e-15	A	G	-0.0154599	0.00505389	0.00222	A	G	-0.011	0.002	4.121e-06
1	7	rs77944304	rs12125336	T	C	72692630	-5.921	3.2e-09	0.835066	T	C	-0.0199987	0.00336093	2.67586e-09	T	C	-0.0174373	0.00612694	0.00442	T	C	-0.008	0.003	0.004165
1	7	rs67474621	rs1205484	T	G	72695547	-6.151	7.72e-10	0.773488	T	G	-0.0234181	0.00306704	2.25107e-14	T	G	-0.0149916	0.00607933	0.01366	T	G	-0.011	0.002	5.238e-06
1	7	rs77944304	rs78152876	A	G	72696649	5.946	2.76e-09	0.828654	A	G	0.0203984	0.00344138	3.07819e-09	A	G	0.0177935	0.00675276	0.008424	A	G	0.008	0.003	0.004033
1	7	rs67474621	rs1194273	T	C	72696927	-6.158	7.36e-10	0.782704	T	C	-0.0234153	0.00306702	2.26586e-14	T	C	-0.0149551	0.00607932	0.01388	T	C	-0.011	0.002	6.975e-06
1	7	rs77944304	rs11209938	T	C	72697178	5.91	3.41e-09	0.835066	T	C	0.0202847	0.00344478	3.89602e-09	T	C	0.0180147	0.00675974	0.007688	T	C	0.008	0.003	0.004143
1	7	rs77944304	rs985227	T	G	72697459	5.936	2.92e-09	0.828654	T	G	0.0194656	0.00327223	2.70238e-09	T	G	0.0155416	0.00561677	0.005656	T	G	0.008	0.003	0.003841
1	7	rs67474621	rs2797543	A	G	72701100	-6.189	6.05e-10	0.782704	A	G	-0.0226973	0.00291636	7.09657e-15	A	G	-0.0152372	0.00505379	0.002571	A	G	-0.011	0.002	7.269e-06
1	7	rs67474621	rs1194271	A	G	72701965	6.11	9.95e-10	0.769997	A	G	0.0232714	0.00306715	3.26643e-14	A	G	0.0148699	0.00607926	0.01443	A	G	0.011	0.002	5.83e-06
1	7	rs67474621	rs1209251	C	G	72701991	6.118	9.48e-10	0.769997	C	G	0.023318	0.00306715	2.90484e-14	C	G	0.0150158	0.00607928	0.01351	C	G	0.011	0.002	5.655e-06
1	7	rs67474621	rs1194270	T	C	72702313	6.2	5.66e-10	0.769997	T	C	0.0226833	0.00291649	7.3916e-15	T	C	0.0155154	0.00505389	0.002142	T	C	0.011	0.002	3.223e-06
1	7	rs67474621	rs1194269	A	G	72703860	-6.177	6.51e-10	0.773488	A	G	-0.0227234	0.0029165	6.63012e-15	A	G	-0.0154957	0.00505405	0.002167	A	G	-0.011	0.002	7.33e-06
1	7	rs67474621	rs1194267	A	G	72704526	6.134	8.58e-10	0.769997	A	G	0.0227758	0.00291647	5.74737e-15	A	G	0.0156013	0.00505387	0.002019	A	G	0.011	0.002	5.239e-06
1	7	rs67474621	rs1194265	A	G	72707226	6.126	9e-10	0.769997	A	G	0.0228183	0.00291646	5.11827e-15	A	G	0.0157226	0.00505388	0.001864	A	G	0.011	0.002	4.137e-06
1	7	rs67474621	rs1194263	C	G	72708154	-6.132	8.66e-10	0.773488	C	G	-0.0230792	0.00299118	1.20282e-14	C	G	-0.0153912	0.00551064	0.005218	C	G	-0.011	0.002	3.697e-06
1	7	rs67474621	rs1026567	A	G	72708584	6.127	8.96e-10	0.769997	A	G	0.0231632	0.00299117	9.64562e-15	A	G	0.0156057	0.00551048	0.004626	A	G	0.011	0.002	3.464e-06
1	7	rs67474621	rs1026566	A	G	72709042	-6.138	8.36e-10	0.773488	A	G	-0.023097	0.00299118	1.14787e-14	A	G	-0.0154901	0.00551052	0.00494	A	G	-0.011	0.002	4.628e-06
1	7	rs77944304	rs17525406	A	G	72712003	6	1.98e-09	0.917501	A	G	0.0203208	0.00344283	3.58355e-09	A	G	0.0199295	0.00627502	0.001494	A	G	0.009	0.003	0.001729
1	7	rs77944304	rs2066416	T	C	72712404	-5.903	3.57e-09	0.828654	T	C	-0.0198498	0.00335608	3.32738e-09	T	C	-0.0162168	0.00611954	0.008051	T	C	-0.008	0.003	0.002291
1	7	rs67474621	rs1194284	A	C	72712529	6.146	7.93e-10	0.769997	A	C	0.0237274	0.00299117	2.14861e-15	A	C	0.0156005	0.00551058	0.004635	A	C	0.012	0.002	1.994e-06
1	7	rs67474621	rs2126077	A	T	72712607	6.303	2.92e-10	0.70838	A	T	0.0229144	0.0029961	2.04036e-14	A	T	0.0154217	0.00551169	0.005142	A	T	0.01	0.002	7.453e-05
1	7	rs67474621	rs1194283	T	C	72713037	-6.144	8.05e-10	0.769997	T	C	-0.0236637	0.00299118	2.54997e-15	T	C	-0.0155618	0.00551057	0.004744	T	C	-0.012	0.002	1.857e-06
1	7	rs67474621	rs1194282	T	C	72713559	6.199	5.7e-10	0.779173	T	C	0.0240821	0.00306702	4.09528e-15	T	C	0.0152408	0.00607931	0.01218	T	C	0.012	0.002	1.981e-06
1	7	rs67474621	rs1194281	T	C	72714003	6.145	8.01e-10	0.769997	T	C	0.0239792	0.00306709	5.35768e-15	T	C	0.0151311	0.00607919	0.0128	T	C	0.012	0.002	1.961e-06
1	7	rs67474621	rs1194278	T	C	72714220	-6.251	4.08e-10	0.769997	T	C	-0.0240054	0.00306714	5.01014e-15	T	C	-0.0152651	0.0060793	0.01204	T	C	-0.012	0.002	1.676e-06
1	7	rs67474621	rs1194277	C	G	72714331	6.221	4.94e-10	0.779173	C	G	0.02402	0.00306702	4.81236e-15	C	G	0.0150644	0.00607926	0.01321	C	G	0.012	0.002	1.476e-06
1	7	rs1620977	rs1620977	A	G	72729142	6.661	2.72e-11	1	A	G	0.0270344	0.0033102	3.16193e-16	A	G	0.027667	0.00570336	1.229e-06	A	G	0.02	0.003	1.686e-11
1	7	rs34305371	rs34305371	A	G	72733610	5.686	1.3e-08	1	A	G	0.0474075	0.005158	3.88974e-20	A	G	0.0501053	0.0100472	6.126e-07	A	G	0.036	0.004	2.344e-16
1	7	rs34305371	rs12127789	T	G	72740073	5.593	2.23e-08	0.759781	T	G	0.0379641	0.00465841	3.65224e-16	T	G	0.0364918	0.00839471	1.38e-05	T	G	0.028	0.004	2.063e-12
1	7	rs11209943	rs3101339	A	C	72748669	-6.489	8.63e-11	0.995413	A	C	-0.0244569	0.00313543	6.18229e-15	A	C	-0.0240912	0.00620748	0.0001039	A	C	-0.012	0.003	1.83e-06
1	7	rs3101338	rs76659454	A	G	72749726	-6.337	2.35e-10	0.85771	A	G	-0.0318894	0.00403981	2.93146e-15	A	G	-0.0293317	0.0079275	0.000216	A	G	-0.016	0.003	7.188e-07
1	7	rs3101338	rs3128341	T	C	72749848	-6.748	1.5e-11	1	T	C	-0.0306605	0.00361438	2.19618e-17	T	C	-0.0284949	0.00623248	4.835e-06	T	C	-0.015	0.003	9.118e-07
1	7	rs3101338	rs3101338	A	C	72750353	6.796	1.08e-11	1	A	C	0.0305961	0.00361778	2.73981e-17	A	C	0.0282056	0.00622914	5.952e-06	A	C	0.015	0.003	9.205e-07
1	7	rs11209943	rs11209943	A	G	72750500	-6.546	5.92e-11	1	A	G	-0.0245259	0.00312904	4.57224e-15	A	G	-0.0241572	0.00620847	9.982e-05	A	G	-0.012	0.003	7.067e-07
1	7	rs11209943	rs3101337	T	C	72751134	6.394	1.62e-10	0.990758	T	C	0.0245273	0.00313732	5.37135e-15	T	C	0.0243069	0.00621025	9.088e-05	T	C	0.012	0.003	9.323e-07
1	7	rs11209943	rs3101336	T	C	72751185	-6.455	1.08e-10	0.990758	T	C	-0.0251995	0.00298314	2.9812e-17	T	C	-0.0261611	0.00516201	4.026e-07	T	C	-0.012	0.003	9.693e-07
1	7	rs11209943	rs2815765	T	C	72752230	-6.377	1.81e-10	0.990758	T	C	-0.0244836	0.00313614	5.86006e-15	T	C	-0.0242561	0.00620997	9.387e-05	T	C	-0.012	0.003	7.95e-07
1	7	rs11209943	rs2568952	C	G	72755105	-6.388	1.68e-10	0.990758	C	G	-0.0245193	0.00313732	5.48044e-15	C	G	-0.0242965	0.00621076	9.146e-05	C	G	-0.012	0.003	9.29e-07
1	7	rs3101338	rs9424979	A	G	72755277	NA	NA	0.662197	A	G	-0.0265141	0.00495515	8.75618e-08	A	G	-0.0278176	0.00679141	4.207e-05	A	G	-0.013	0.003	2.611e-06
1	7	rs3101338	rs17526367	T	C	72756049	-5.777	7.61e-09	0.637922	T	C	-0.0304842	0.00347454	1.73062e-18	T	C	-0.0338497	0.00644755	1.523e-07	T	C	-0.015	0.003	2.1e-07
1	7	rs3101338	rs12135603	T	G	72758237	-5.668	1.44e-08	0.637922	T	G	-0.030159	0.00352744	1.23285e-17	T	G	-0.0329817	0.0068285	1.368e-06	T	G	-0.015	0.003	2.49e-07
1	7	rs3101338	rs72942968	T	C	72758366	-5.792	6.96e-09	0.637922	T	C	-0.0302231	0.00352762	1.05719e-17	T	C	-0.0329329	0.00682971	1.424e-06	T	C	-0.015	0.003	2.168e-07
1	7	rs11209943	rs2613492	C	T	72758984	NA	NA	0.639593	T	C	0.031634	0.0048412	6.38956e-11	T	C	0.0338305	0.0064439	1.518e-07	T	C	0.015	0.003	2.418e-07
1	7	rs3101338	rs9424980	A	G	72759437	5.79	7.06e-09	0.637922	A	G	0.0302904	0.00352749	8.93062e-18	A	G	0.0329054	0.00682827	1.44e-06	A	G	0.015	0.003	2.354e-07
1	7	rs11209943	rs2815759	A	G	72760537	5.63	1.8e-08	0.643202	A	G	0.0300476	0.00350369	9.8246e-18	A	G	0.0328583	0.00682274	1.463e-06	A	G	0.015	0.003	1.951e-07
1	7	rs11209943	rs2568955	T	C	72762169	-5.848	4.96e-09	0.643202	T	C	-0.0300728	0.00350043	8.60859e-18	T	C	-0.0329109	0.00682374	1.413e-06	T	C	-0.015	0.003	1.819e-07
1	7	rs11209943	rs9425087	A	G	72763457	5.691	1.26e-08	0.641277	A	G	0.0302818	0.00352684	8.99644e-18	A	G	0.0330754	0.00682811	1.27e-06	A	G	0.015	0.003	2.049e-07
1	7	rs11209943	rs2568956	T	C	72764376	-6.423	1.34e-10	0.990758	T	C	-0.0245136	0.00313625	5.44383e-15	T	C	-0.0242402	0.00621066	9.517e-05	T	C	-0.012	0.003	8.728e-07
1	7	rs3101338	rs9425089	A	C	72765082	6.771	1.28e-11	1	A	C	0.0312638	0.00380504	2.09649e-16	A	C	0.0299436	0.00749526	6.481e-05	A	C	0.015	0.003	8.689e-07
1	7	rs11209943	rs2568958	A	G	72765116	6.376	1.82e-10	0.986178	A	G	0.0249394	0.00298299	6.24237e-17	A	G	0.02555	0.00516266	7.467e-07	A	G	0.012	0.003	9.547e-07
1	7	rs3101338	rs9425090	A	G	72765300	-6.753	1.45e-11	1	A	G	-0.0312232	0.00380518	2.29712e-16	A	G	-0.0298584	0.00749647	6.817e-05	A	G	-0.015	0.003	8.355e-07
1	7	rs3101338	rs9424981	T	C	72766085	6.762	1.36e-11	1	T	C	0.0312072	0.00380518	2.37923e-16	T	C	0.029777	0.00749485	7.112e-05	T	C	0.015	0.003	9.544e-07
1	7	rs11209943	rs11209948	T	G	72811904	6.356	2.07e-10	0.990758	T	G	0.0244631	0.0031386	6.47851e-15	T	G	0.0243177	0.00620982	9.015e-05	T	G	0.012	0.003	2.033e-06
1	7	rs3101338	rs78095791	A	G	72811957	6.771	1.28e-11	1	A	G	0.0312014	0.00380879	2.57018e-16	A	G	0.0296775	0.00749622	7.538e-05	A	G	0.015	0.003	8.897e-07
1	7	rs11209943	rs2568960	A	G	72812249	-6.344	2.24e-10	0.990758	A	G	-0.0245415	0.00313881	5.33546e-15	A	G	-0.0241508	0.00621002	0.0001007	A	G	-0.012	0.003	1.739e-06
1	7	rs11209943	rs2815753	A	G	72812324	6.494	8.35e-11	0.990758	A	G	0.0246909	0.00313759	3.564e-15	A	G	0.0243018	0.00620895	9.062e-05	A	G	0.012	0.003	1.712e-06
1	7	rs11209943	rs2815752	A	G	72812440	6.469	9.85e-11	0.990758	A	G	0.0250628	0.00298273	4.36551e-17	A	G	0.0260463	0.00516177	4.514e-07	A	G	0.012	0.003	1.765e-06
1	7	rs11209943	rs2613494	A	G	72812657	-6.427	1.31e-10	0.990758	A	G	-0.0245178	0.00313883	5.66712e-15	A	G	-0.0243052	0.00620982	9.081e-05	A	G	-0.012	0.003	2.09e-06
1	7	rs11209943	rs2568961	T	C	72812747	6.408	1.47e-10	0.990758	T	C	0.0244597	0.0031385	6.52195e-15	T	C	0.0243559	0.00621007	8.782e-05	T	C	0.012	0.003	1.997e-06
1	7	rs3101338	rs6682389	T	C	72813057	-6.791	1.12e-11	1	T	C	-0.0312792	0.00380886	2.17152e-16	T	C	-0.0302644	0.00749491	5.391e-05	T	C	-0.015	0.003	8.99e-07
1	7	rs11209943	rs1460943	T	C	72813129	6.426	1.31e-10	0.990758	T	C	0.0247136	0.00301424	2.42527e-16	T	C	0.0250588	0.00534189	2.724e-06	T	C	0.012	0.003	1.71e-06
1	7	rs11209943	rs1432639	A	C	72813218	6.454	1.09e-10	0.990758	A	C	0.0245387	0.00313169	4.66533e-15	A	C	0.0245668	0.00620843	7.591e-05	A	C	0.012	0.003	1.307e-06
1	7	rs11209943	rs1460942	A	T	72813256	-6.437	1.22e-10	0.990758	A	T	-0.0244935	0.00313877	6.01905e-15	A	T	-0.0242445	0.00621018	9.45e-05	A	T	-0.012	0.003	1.618e-06
1	7	rs3101338	rs6690399	A	T	72817099	6.498	8.12e-11	0.849017	A	T	0.031965	0.00401036	1.57912e-15	A	T	0.0292861	0.0078726	0.0001996	A	T	0.016	0.003	9.947e-07
1	7	rs3101338	rs17526561	A	C	72818226	-6.507	7.68e-11	0.849017	A	C	-0.0309319	0.00391115	2.60179e-15	A	C	-0.0278194	0.00713684	9.69e-05	A	C	-0.015	0.003	1.25e-06
1	7	rs3101338	rs6697541	A	G	72819360	6.713	1.91e-11	0.95936	A	G	0.0296954	0.00371664	1.35102e-15	A	G	0.027186	0.00679481	6.298e-05	A	G	0.014	0.003	1.687e-06
1	7	rs11209943	rs2012697	T	C	72819612	-6.456	1.08e-10	0.936434	T	C	-0.0247422	0.00305319	5.33081e-16	T	C	-0.0242643	0.00561414	1.546e-05	T	C	-0.012	0.003	2.456e-06
1	7	rs3101338	rs74967575	A	T	72819888	-6.301	2.96e-10	0.830074	A	T	-0.0311505	0.00404027	1.25795e-14	A	T	-0.0283558	0.00790516	0.0003351	A	T	-0.015	0.003	2.96e-06
1	7	rs3101338	rs12137749	A	G	72820709	-6.746	1.52e-11	0.95936	A	G	-0.0298546	0.00371794	9.7571e-16	A	G	-0.0271608	0.00679529	6.428e-05	A	G	-0.014	0.003	1.796e-06
1	7	rs3101338	rs12143571	A	T	72822096	-6.506	7.7e-11	0.849017	A	T	-0.0308608	0.00390889	2.90259e-15	A	T	-0.0277216	0.00713737	0.0001027	A	T	-0.015	0.003	1.102e-06
1	7	rs3101338	rs12117438	A	G	72822479	6.505	7.77e-11	0.849017	A	G	0.0314236	0.00401027	4.65938e-15	A	G	0.0293778	0.00787398	0.000191	A	G	0.015	0.003	1.097e-06
1	7	rs11209943	rs990871	T	C	72823713	6.419	1.37e-10	0.936434	T	C	0.0245377	0.00305007	8.62807e-16	T	C	0.0243115	0.00561336	1.482e-05	T	C	0.012	0.003	2.386e-06
1	7	rs11209943	rs6661921	A	G	72824855	6.399	1.56e-10	0.936434	A	G	0.0244944	0.00312873	4.92281e-15	A	G	0.0239058	0.00617721	0.000109	A	G	0.012	0.003	2.904e-06
1	7	rs11209943	rs6687024	T	C	72824860	6.416	1.4e-10	0.936434	T	C	0.0245217	0.00312885	4.60306e-15	T	C	0.0238889	0.00617763	0.0001103	T	C	0.012	0.003	3.164e-06
1	7	rs11209943	rs6699744	A	T	72825144	NA	NA	0.933642	A	T	-0.0250063	0.00360789	4.17868e-12	NA	NA	NA	NA	NA	A	T	-0.012	0.003	0.0001945
1	7	rs3101338	rs12143898	A	G	72826172	-6.764	1.34e-11	0.95936	A	G	-0.0301164	0.00362504	9.74368e-17	A	G	-0.0284286	0.00623025	5.046e-06	A	G	-0.014	0.003	2.477e-06
1	7	rs3101338	rs6660464	T	C	72826949	6.759	1.39e-11	0.95936	T	C	0.029987	0.00371787	7.2851e-16	T	C	0.0277256	0.00679715	4.517e-05	T	C	0.014	0.003	2.181e-06
1	7	rs3101338	rs12139531	A	G	72827776	-6.745	1.53e-11	0.952644	A	G	-0.0307225	0.00381228	7.70292e-16	A	G	-0.0303881	0.00750694	5.161e-05	A	G	-0.014	0.003	2.241e-06
1	7	rs3101338	rs12144335	T	C	72828183	6.505	7.78e-11	0.849017	T	C	0.0320888	0.00401018	1.2259e-15	T	C	0.0299611	0.00787208	0.0001415	T	C	0.016	0.003	1.022e-06
1	7	rs11209943	rs10889947	T	C	72828221	-6.461	1.04e-10	0.916555	T	C	-0.0247591	0.00310285	1.4697e-15	T	C	-0.0253107	0.00601063	2.538e-05	T	C	-0.012	0.003	2.299e-06
1	7	rs114030538	rs115720372	T	G	72829015	4.622	3.8e-06	0.625849	T	G	0.0267851	0.00662882	5.32914e-05	T	G	0.0333299	0.0129537	0.01008	T	G	0.018	0.005	0.0003255
1	7	rs3101338	rs11581382	T	C	72829347	-6.518	7.14e-11	0.849017	T	C	-0.0311479	0.0038132	3.12413e-16	T	C	-0.0275508	0.00654414	2.556e-05	T	C	-0.016	0.003	7.839e-07
1	7	rs3101338	rs11581403	T	C	72829530	-6.496	8.24e-11	0.849017	T	C	-0.03051	0.00381321	1.23295e-15	T	C	-0.02707	0.00654815	3.572e-05	T	C	-0.015	0.003	1.988e-06
1	7	rs3101338	rs11588959	T	G	72829623	-6.503	7.89e-11	0.849017	T	G	-0.0321125	0.00401018	1.16843e-15	T	G	-0.0300949	0.00788031	0.0001339	T	G	-0.016	0.003	6.538e-07
1	7	rs11209943	rs11209950	A	T	72829680	-6.448	1.13e-10	0.936434	A	T	-0.0245137	0.00313018	4.82466e-15	A	T	-0.0240637	0.00619878	0.0001035	A	T	-0.012	0.003	1.606e-06
1	7	rs3101338	rs11581447	A	C	72829683	-6.78	1.2e-11	0.952705	A	C	-0.0303651	0.00378458	1.02875e-15	A	C	-0.029699	0.00753016	8.018e-05	A	C	-0.014	0.003	2.283e-06
1	7	rs3101338	rs72943001	T	C	72831388	-6.475	9.5e-11	0.849017	T	C	-0.0320755	0.00400895	1.23433e-15	T	C	-0.0302157	0.00786663	0.0001227	T	C	-0.016	0.003	7.246e-07
1	7	rs3101338	rs12123328	A	G	72833201	6.754	1.44e-11	0.95936	A	G	0.0298931	0.00371603	8.67019e-16	A	G	0.0278127	0.00679518	4.256e-05	A	G	0.014	0.003	2.165e-06
1	7	rs3101338	rs60012417	T	C	72834023	-6.745	1.53e-11	0.95299	T	C	-0.0305026	0.00381053	1.1965e-15	T	C	-0.0300466	0.00749477	6.092e-05	T	C	-0.014	0.003	2.082e-06
1	7	rs3101338	rs12117250	T	G	72834799	-6.747	1.51e-11	0.95936	T	G	-0.0298646	0.00371603	9.22984e-16	T	G	-0.0277771	0.00679313	4.335e-05	T	G	-0.014	0.003	2.025e-06
1	7	rs11209943	rs1841499	A	T	72836456	-6.454	1.09e-10	0.936434	A	T	-0.0246437	0.00305259	6.85619e-16	A	T	-0.0242113	0.00561357	1.612e-05	A	T	-0.012	0.003	2.717e-06
1	7	rs11209943	rs7531118	T	C	72837239	-6.38	1.77e-10	0.680847	T	C	-0.0240216	0.00291817	1.8452e-16	T	C	-0.0251061	0.00506171	7.053e-07	T	C	-0.012	0.003	1.838e-06
1	7	rs11209943	rs11209951	T	C	72837490	6.454	1.09e-10	0.936434	T	C	0.0250619	0.00297623	3.74315e-17	T	C	0.0260236	0.00514706	4.293e-07	T	C	0.012	0.003	2.29e-06
1	7	rs11209943	rs11209952	T	C	72837500	6.46	1.05e-10	0.931921	T	C	0.024411	0.00304658	1.12319e-15	T	C	0.0241043	0.00561087	1.738e-05	T	C	0.012	0.003	1.726e-06
1	7	rs3101338	rs72945107	T	G	72838186	-6.744	1.54e-11	0.95936	T	G	-0.0304678	0.0038106	1.29021e-15	T	G	-0.0299084	0.00749772	6.642e-05	T	G	-0.014	0.003	1.984e-06
1	7	rs3101338	rs112657490	A	G	72838345	-6.734	1.65e-11	0.95936	A	G	-0.0304447	0.00381053	1.35356e-15	A	G	-0.0299282	0.00749329	6.501e-05	A	G	-0.014	0.003	2.165e-06
1	7	rs11209943	rs10789336	A	G	72838406	6.478	9.27e-11	0.936434	A	G	0.0247551	0.00305287	5.11135e-16	A	G	0.0242097	0.00561318	1.612e-05	A	G	0.012	0.003	2.772e-06
1	7	rs3101338	rs4322186	T	G	72838561	-6.645	3.04e-11	0.95936	T	G	-0.0303108	0.00371617	3.44966e-16	T	G	-0.0277511	0.00679342	4.404e-05	T	G	-0.015	0.003	1.287e-06
1	7	rs3101338	rs1903376	T	C	72839905	-6.661	2.72e-11	0.95936	T	C	-0.0308561	0.0038106	5.61347e-16	T	C	-0.0294678	0.00749817	8.501e-05	T	C	-0.015	0.003	1.398e-06
1	7	rs3101338	rs1903374	A	G	72840051	-6.755	1.43e-11	0.95936	A	G	-0.0304372	0.00381039	1.37222e-15	A	G	-0.0295704	0.00750136	8.073e-05	A	G	-0.014	0.003	1.818e-06
1	7	rs3101338	rs79547900	A	G	72841201	-6.759	1.39e-11	0.95936	A	G	-0.0310031	0.00381088	4.10561e-16	A	G	-0.0300634	0.00750085	6.131e-05	A	G	-0.015	0.003	1.664e-06
1	7	rs3101338	rs12120564	T	C	72843946	6.467	1e-10	0.842182	T	C	0.0309022	0.00381238	5.24234e-16	T	C	0.027449	0.00654483	2.743e-05	T	C	0.016	0.003	8.799e-07
1	7	rs3101338	rs12131707	T	C	72844293	-6.37	1.89e-10	0.846585	T	C	-0.0281983	0.00371706	3.29473e-14	T	C	-0.0293816	0.00729795	5.678e-05	T	C	-0.014	0.003	3.546e-06
1	7	rs3101338	rs2999987	T	C	72844514	6.771	1.28e-11	0.939389	T	C	0.0308087	0.00376511	2.77622e-16	T	C	0.0305621	0.00749254	4.524e-05	T	C	0.015	0.003	1.449e-06
1	7	rs3101338	rs72945111	T	C	72845176	6.063	1.34e-09	0.853442	T	C	0.0288553	0.00385209	6.84514e-14	T	C	0.0275162	0.00759907	0.0002931	T	C	0.014	0.003	9.104e-06
1	7	rs3101338	rs72945113	T	C	72845264	6.197	5.77e-10	0.853442	T	C	0.029107	0.00385356	4.24483e-14	T	C	0.027739	0.0075914	0.0002579	T	C	0.014	0.003	1.154e-05
1	7	rs34305371	rs12724444	A	G	72904288	5.373	7.77e-08	0.786656	A	G	0.0360412	0.00502768	7.57946e-13	A	G	0.0350573	0.00900752	9.942e-05	A	G	0.031	0.005	8.045e-11
1	7	rs11209943	rs10789340	A	G	72940273	-3.936	8.27e-05	0.664375	A	G	-0.0156123	0.00301608	2.26281e-07	A	G	-0.0106082	0.00523087	0.04253	A	G	-0.01	0.003	0.0002124
1	8	rs7534501	rs6593680	A	G	96169760	-4.711	2.46e-06	0.658366	A	G	-0.018171	0.00299501	1.30252e-09	A	G	-0.0217334	0.00551188	8.047e-05	A	G	-0.009	0.002	0.0004084
1	8	rs7534501	rs34952653	C	G	96170727	-4.707	2.51e-06	0.652061	C	G	-0.0185649	0.00307105	1.49294e-09	C	G	-0.0242297	0.00608024	6.743e-05	C	G	-0.009	0.002	0.0002902
1	8	rs7534501	rs34496282	T	C	96171104	4.679	2.88e-06	0.655886	T	C	0.0185666	0.00307091	1.48514e-09	T	C	0.0243021	0.0060801	6.416e-05	T	C	0.009	0.002	0.0003272
1	8	rs7534501	rs1931262	T	C	96174912	5.831	5.52e-09	0.865195	T	C	0.0232418	0.00291908	1.69259e-15	T	C	0.0186529	0.00505363	0.0002232	T	C	0.012	0.002	2.043e-06
1	8	rs7534501	rs1931263	T	G	96175101	-5.904	3.55e-09	0.861217	T	G	-0.0253414	0.00299407	2.58683e-17	T	G	-0.0252737	0.00550986	4.503e-06	T	G	-0.012	0.002	2.413e-06
1	8	rs7534501	rs10874938	A	T	96175936	6.018	1.77e-09	0.87572	A	T	0.0257168	0.00299562	9.10086e-18	A	T	0.026239	0.00551008	1.918e-06	A	T	0.012	0.002	4.55e-07
1	8	rs7534501	rs6678734	A	G	96176563	5.978	2.26e-09	0.869698	A	G	0.0235475	0.00291875	7.16643e-16	A	G	0.0196934	0.00505347	9.748e-05	A	G	0.012	0.002	8.96e-07
1	8	rs7534501	rs12128772	A	G	96176709	-5.999	1.98e-09	0.876879	A	G	-0.0253855	0.00299356	2.25127e-17	A	G	-0.0258352	0.00550975	2.749e-06	A	G	-0.012	0.002	1.037e-06
1	8	rs7534501	rs12128864	C	G	96177014	-6.009	1.87e-09	0.876879	C	G	-0.0254925	0.00299355	1.65441e-17	C	G	-0.0261933	0.00550974	1.996e-06	C	G	-0.012	0.002	1.122e-06
1	8	rs7534501	rs34701878	A	G	96177073	6.011	1.85e-09	0.876879	A	G	0.0259001	0.00306956	3.2358e-17	A	G	0.0280573	0.00607827	3.908e-06	A	G	0.012	0.002	1.058e-06
1	8	rs7534501	rs1931245	A	G	96178537	5.959	2.54e-09	0.884155	A	G	0.0254946	0.00299439	1.67891e-17	A	G	0.0260507	0.00550988	2.267e-06	A	G	0.012	0.002	8.532e-07
1	8	rs7534501	rs11583189	A	T	96180192	-5.924	3.13e-09	0.87572	A	T	-0.02545	0.00299485	1.93021e-17	A	T	-0.0260629	0.00551012	2.245e-06	A	T	-0.012	0.002	1.139e-06
1	8	rs7534501	rs1931252	A	C	96182043	-5.935	2.94e-09	0.880731	A	C	-0.0252398	0.00299382	3.43775e-17	A	C	-0.0259076	0.0055099	2.579e-06	A	C	-0.012	0.002	9.341e-07
1	8	rs7534501	rs1931253	A	G	96182063	-5.883	4.02e-09	0.891938	A	G	-0.0234843	0.00291994	8.78477e-16	A	G	-0.0196239	0.00505381	0.000103	A	G	-0.012	0.002	1.224e-06
1	8	rs7534501	rs713456	A	C	96184729	-5.869	4.38e-09	0.87572	A	C	-0.022981	0.0029194	3.49464e-15	A	C	-0.0188154	0.00505382	0.000197	A	C	-0.012	0.002	9.553e-07
1	8	rs7534501	rs11165471	A	G	96184838	-5.877	4.17e-09	0.880731	A	G	-0.0230694	0.00291916	2.72801e-15	A	G	-0.0193255	0.00505373	0.000131	A	G	-0.012	0.002	9.723e-07
1	8	rs7534501	rs953401	A	G	96186671	-5.885	3.98e-09	0.883558	A	G	-0.0250776	0.00299516	5.62973e-17	A	G	-0.0254305	0.00551039	3.934e-06	A	G	-0.012	0.002	9.966e-07
1	8	rs7534501	rs59172799	A	G	96187116	-5.895	3.74e-09	0.8723	A	G	-0.0255476	0.00307017	8.70412e-17	A	G	-0.0281135	0.0060786	3.741e-06	A	G	-0.012	0.002	1.264e-06
1	8	rs7534501	rs11583841	A	C	96187876	5.957	2.56e-09	0.880731	A	C	0.0231386	0.00291902	2.24795e-15	A	C	0.019383	0.00505424	0.0001254	A	C	0.012	0.002	1.576e-06
1	8	rs7534501	rs2210636	A	G	96189879	NA	NA	0.883558	A	G	-0.0300119	0.00443556	1.3221e-11	A	G	-0.0284861	0.00607897	2.785e-06	A	G	-0.012	0.002	1.212e-06
1	8	rs7534501	rs12134520	A	G	96190605	5.856	4.74e-09	0.891938	A	G	0.0257831	0.00307106	4.63828e-17	A	G	0.0283155	0.00607889	3.2e-06	A	G	0.012	0.002	1.1e-06
1	8	rs7534501	rs12725094	C	G	96191837	5.975	2.3e-09	0.891019	C	G	0.0259409	0.00307224	3.07629e-17	C	G	0.0284979	0.00607889	2.759e-06	C	G	0.012	0.002	1.012e-06
1	8	rs7534501	rs6662729	A	G	96195563	-5.866	4.47e-09	0.8723	A	G	-0.0256259	0.00307024	7.02743e-17	A	G	-0.0281384	0.00607873	3.681e-06	A	G	-0.012	0.002	1.489e-06
1	8	rs7534501	rs6672864	C	G	96196096	5.9	3.65e-09	0.883558	C	G	0.025232	0.002995	3.61736e-17	C	G	0.0255681	0.00551036	3.485e-06	C	G	0.012	0.002	1.427e-06
1	8	rs7534501	rs11586170	T	C	96196776	5.885	3.97e-09	0.891019	T	C	0.0257971	0.00307118	4.4746e-17	T	C	0.0283343	0.00607902	3.142e-06	T	C	0.012	0.002	1.222e-06
1	8	rs7534501	rs1931243	C	G	96199038	-5.854	4.79e-09	0.891527	C	G	-0.0249772	0.00299412	7.29984e-17	C	G	-0.0251042	0.00551013	5.217e-06	C	G	-0.012	0.002	1.082e-06
1	8	rs7534501	rs6668048	T	C	96199657	-5.905	3.52e-09	0.899375	T	C	-0.0252356	0.00299483	3.56512e-17	T	C	-0.0256121	0.00551035	3.346e-06	T	C	-0.012	0.002	7.332e-07
1	8	rs7534501	rs6668127	T	C	96199696	-5.909	3.45e-09	0.888039	T	C	-0.0250845	0.00299385	5.35184e-17	T	C	-0.0255724	0.0055101	3.468e-06	T	C	-0.012	0.002	1.2e-06
1	8	rs7534501	rs11165472	A	T	96200401	5.852	4.86e-09	0.895961	A	T	0.0255091	0.00307052	9.7538e-17	A	T	0.0276707	0.0060788	5.314e-06	A	T	0.012	0.002	1.196e-06
1	8	rs7534501	rs12134151	C	G	96202443	-5.858	4.69e-09	0.844127	C	G	-0.026083	0.00306834	1.8848e-17	C	G	-0.0252972	0.00607814	3.153e-05	C	G	-0.013	0.002	1.038e-07
1	8	rs7534501	rs35305395	A	G	96207656	6.094	1.1e-09	0.954894	A	G	0.0258804	0.00307738	4.10464e-17	A	G	0.0283046	0.00608309	3.27e-06	A	G	0.012	0.002	1.011e-06
1	8	rs7534501	rs7534501	A	G	96221514	-6.12	9.35e-10	1	A	G	-0.0254368	0.00307714	1.38079e-16	A	G	-0.0275235	0.00608255	6.027e-06	A	G	-0.012	0.002	1.033e-06
1	8	rs7534501	rs6690195	T	C	96221653	-5.777	7.58e-09	0.939609	T	C	-0.0256018	0.00307088	7.62355e-17	T	C	-0.0271721	0.00607877	7.806e-06	T	C	-0.013	0.002	2.837e-07
1	9	rs516902	rs321586	T	C	96685666	-5.737	9.63e-09	0.660923	T	C	-0.0124202	0.0031674	8.8083e-05	T	C	-0.0111593	0.00566463	0.0489	T	C	-0.002	0.003	0.3894
1	9	rs516902	rs321588	A	G	96688818	-5.731	1e-08	0.651315	A	G	-0.0115956	0.00312639	0.000208118	A	G	-0.00840305	0.00546718	0.1244	A	G	-0.002	0.003	0.4012
1	9	rs516902	rs321589	T	C	96689536	NA	NA	0.657146	T	C	0.00769297	0.00480086	0.109064	T	C	0.0120099	0.00658076	0.06798	T	C	0.002	0.003	0.367
1	9	rs516902	rs4498848	A	G	96690250	-4.9	9.6e-07	0.796773	A	G	-0.0124383	0.00324159	0.000124489	A	G	-0.0185192	0.00647073	0.004204	A	G	0.001	0.003	0.6424
1	9	rs516902	rs613614	A	G	96693878	-5.8	6.62e-09	0.683658	A	G	-0.0124721	0.00313828	7.06206e-05	A	G	-0.0094741	0.0054827	0.08392	A	G	-0.003	0.003	0.3264
1	9	rs516902	rs516902	T	C	96700020	-6.078	1.22e-09	1	T	C	-0.0117596	0.00299697	8.71562e-05	T	C	-0.0084467	0.0052108	0.1051	T	C	-0.001	0.003	0.776
1	9	rs516902	rs615340	T	C	96700073	-5.507	3.65e-08	0.838552	T	C	-0.0132087	0.00321766	4.04219e-05	T	C	-0.0146155	0.0064019	0.02244	T	C	-0.001	0.003	0.7764
1	9	rs516902	rs601557	A	G	96700878	-5.951	2.67e-09	0.995655	A	G	-0.0132137	0.0031496	2.72434e-05	A	G	-0.0137108	0.00626638	0.02868	A	G	-0.001	0.003	0.8016
1	9	rs516902	rs574735	A	G	96701718	-5.949	2.7e-09	1	A	G	-0.0116994	0.00299475	9.35882e-05	A	G	-0.00846136	0.00520699	0.1042	A	G	-0.001	0.003	0.7688
1	9	rs516902	rs524830	A	G	96703726	5.893	3.8e-09	1	A	G	0.0133482	0.00314933	2.2511e-05	A	G	0.0141042	0.00626299	0.02431	A	G	0.001	0.003	0.7725
1	9	rs516902	rs652056	T	C	96704420	-5.926	3.11e-09	1	T	C	-0.0117483	0.00299475	8.74683e-05	T	C	-0.0085063	0.005209	0.1024	T	C	-0.001	0.003	0.7666
1	9	rs516902	rs651499	A	T	96704585	-5.844	5.09e-09	0.936652	A	T	-0.0129097	0.00314871	4.13167e-05	A	T	-0.0126034	0.00624548	0.04363	A	T	-0.001	0.003	0.8286
1	9	rs516902	rs11165566	T	C	96704827	-4.882	1.05e-06	0.844382	T	C	-0.0124818	0.00325292	0.000124489	T	C	-0.017411	0.0064918	0.007326	T	C	0.001	0.003	0.6957
1	9	rs516902	rs12032831	T	C	96705208	4.24	2.24e-05	0.689643	T	C	0.0112347	0.00333254	0.000748411	T	C	0.0149393	0.00635713	0.01875	T	C	-0.001	0.003	0.7968
1	9	rs516902	rs647867	A	G	96705330	5.934	2.97e-09	1	A	G	0.0133541	0.00314948	2.23423e-05	A	G	0.0140424	0.00626332	0.02493	A	G	0.001	0.003	0.7687
1	9	rs516902	rs9660411	C	G	96706863	NA	NA	0.844382	NA	NA	NA	NA	NA	NA	NA	NA	NA	NA	NA	NA	NA	NA	NA
1	9	rs516902	rs61789676	G	C	96707508	NA	NA	0.965762	NA	NA	NA	NA	NA	C	G	-0.0126314	0.00625009	0.0433	NA	NA	NA	NA	NA
1	9	rs516902	rs61789682	C	T	96708617	NA	NA	1	NA	NA	NA	NA	NA	T	C	-0.0140549	0.00626334	0.02486	NA	NA	NA	NA	NA
1	9	rs516902	rs75566514	C	T	96708810	NA	NA	1	T	C	-0.00856414	0.0045691	0.060881	T	C	-0.0140416	0.00626298	0.02498	T	C	-0.002	0.003	0.3703
1	9	rs516902	rs9659182	C	T	96709275	NA	NA	0.987007	NA	NA	NA	NA	NA	T	C	-0.014547	0.00625947	0.02015	NA	NA	NA	NA	NA
1	9	rs516902	rs9659200	C	T	96709475	NA	NA	0.995648	T	C	-0.00945449	0.0045644	0.0383258	T	C	-0.0139396	0.00625654	0.0259	T	C	-0.003	0.003	0.2809
1	9	rs516902	rs9659207	C	T	96709484	NA	NA	0.995648	T	C	-0.00757281	0.0045644	0.0970949	T	C	-0.0139396	0.00625653	0.02591	T	C	-0.001	0.003	0.7273
1	9	rs516902	rs9660527	T	C	96709522	NA	NA	1	T	C	0.00763173	0.00456938	0.0948817	T	C	0.0140612	0.00626336	0.02475	T	C	0.001	0.003	0.752
1	9	rs516902	rs9661283	G	T	96709627	NA	NA	1	NA	NA	NA	NA	NA	T	G	-0.0140729	0.00626018	0.0246	NA	NA	NA	NA	NA
1	9	rs516902	rs74658983	G	T	96710096	NA	NA	1	NA	NA	NA	NA	NA	T	G	-0.0140549	0.00626334	0.02484	NA	NA	NA	NA	NA
1	9	rs516902	rs77095828	T	C	96710203	NA	NA	0.987007	NA	NA	NA	NA	NA	T	C	0.0141637	0.00623951	0.0232	NA	NA	NA	NA	NA
1	9	rs516902	rs28865633	T	G	96710265	NA	NA	0.987007	NA	NA	NA	NA	NA	NA	NA	NA	NA	NA	NA	NA	NA	NA	NA
1	9	rs516902	rs200082022	T	C	96710811	NA	NA	0.839511	NA	NA	NA	NA	NA	T	C	0.0173645	0.00649139	0.007463	NA	NA	NA	NA	NA
1	9	rs516902	rs201281861	T	C	96711358	NA	NA	0.798192	NA	NA	NA	NA	NA	T	C	0.0179956	0.00652963	0.005859	NA	NA	NA	NA	NA
1	9	rs516902	rs199786982	T	C	96711365	NA	NA	0.798192	NA	NA	NA	NA	NA	T	C	0.0180022	0.00652962	0.005841	NA	NA	NA	NA	NA
1	9	rs516902	rs200942625	G	A	96711383	NA	NA	1	NA	NA	NA	NA	NA	A	G	-0.0142873	0.00625813	0.02245	NA	NA	NA	NA	NA
1	9	rs516902	rs146428892	T	C	96711484	NA	NA	1	T	C	0.00668687	0.00456937	0.143354	T	C	0.0140549	0.00626334	0.02485	T	C	0	0.003	0.8765
1	9	rs516902	rs74792543	C	A	96711877	NA	NA	1	A	C	-0.00762873	0.00456937	0.0950108	A	C	-0.0140549	0.00626334	0.02485	A	C	-0.001	0.003	0.8057
1	9	rs516902	rs474999	T	G	96712329	NA	NA	0.995679	T	G	0.006737	0.004569	0.140347	T	G	0.0141603	0.00626284	0.02378	T	G	0	0.003	0.856
1	9	rs516902	rs638380	G	A	96712340	NA	NA	0.995679	A	G	-0.006737	0.004569	0.140347	A	G	-0.0141603	0.00626284	0.02378	A	G	0	0.003	0.9215
1	9	rs516902	rs498154	A	G	96712521	NA	NA	1	A	G	0.00668687	0.00456937	0.143354	A	G	0.0140549	0.00626334	0.02485	A	G	0	0.003	0.92
1	9	rs516902	rs502505	A	G	96712930	-5.942	2.82e-09	1	A	G	-0.0132546	0.00314983	2.57613e-05	A	G	-0.0137823	0.00626466	0.02781	A	G	-0.001	0.003	0.7758
1	9	rs516902	rs608948	T	C	96713784	-5.979	2.24e-09	1	T	C	-0.0133806	0.00314947	2.15171e-05	T	C	-0.014055	0.00626336	0.02486	T	C	-0.001	0.003	0.773
1	9	rs516902	rs534693	A	G	96714198	5.939	2.86e-09	1	A	G	0.0132905	0.00314953	2.44475e-05	A	G	0.0139052	0.00626641	0.02646	A	G	0.001	0.003	0.7809
1	9	rs516902	rs324859	A	T	96714511	4.911	9.05e-07	0.844382	A	T	0.0102088	0.003093	0.000964739	A	T	0.00831667	0.00539693	0.1233	A	T	-0.001	0.003	0.6581
1	9	rs516902	rs2219909	A	G	96714602	5.97	2.37e-09	1	A	G	0.0133144	0.00314951	2.36369e-05	A	G	0.0140051	0.00626348	0.02533	A	G	0.001	0.003	0.7653
1	9	rs516902	rs324860	T	C	96714996	-4.892	9.96e-07	0.844382	T	C	-0.0101266	0.00309385	0.00106362	T	C	-0.00840877	0.00539716	0.1192	T	C	0.001	0.003	0.6295
1	9	rs516902	rs681950	T	C	96715123	-5.986	2.16e-09	1	T	C	-0.0132907	0.00314957	2.44475e-05	T	C	-0.0139012	0.0062646	0.0265	T	C	-0.001	0.003	0.7972
1	9	rs516902	rs610263	A	G	96715315	-5.981	2.22e-09	1	NA	NA	NA	NA	NA	A	G	-0.0140051	0.00626348	0.02533	NA	NA	NA	NA	NA
1	9	rs516902	rs668401	T	C	96715798	-5.982	2.2e-09	1	T	C	-0.0117434	0.00299482	8.80943e-05	T	C	-0.00873734	0.005207	0.09337	T	C	-0.001	0.003	0.8243
1	9	rs516902	rs668342	C	G	96715836	5.967	2.41e-09	1	C	G	0.0114352	0.00299482	0.000134357	C	G	0.00895208	0.00520773	0.08565	C	G	0	0.003	0.8624
1	9	rs516902	rs1386305	A	G	96717156	5.966	2.43e-09	1	A	G	0.0133253	0.00314959	2.32848e-05	A	G	0.0140565	0.00626406	0.02483	A	G	0.001	0.003	0.8142
1	9	rs516902	rs971157	C	G	96717849	5.943	2.79e-09	1	C	G	0.0133253	0.00314959	2.32848e-05	C	G	0.0140619	0.00626367	0.02474	C	G	0.001	0.003	0.8234
1	9	rs516902	rs971156	T	C	96717936	6.004	1.93e-09	1	T	C	0.0135213	0.00314941	1.76061e-05	T	C	0.0145627	0.00626351	0.02008	T	C	0.001	0.003	0.8084
1	9	rs516902	rs321591	A	G	96718961	-5.96	2.53e-09	1	A	G	-0.0118439	0.00299488	7.66196e-05	A	G	-0.00895111	0.00520716	0.08557	A	G	-0.001	0.003	0.8387
1	9	rs516902	rs321592	T	C	96719266	5.971	2.36e-09	1	T	C	0.0114303	0.00299488	0.000135295	T	C	0.00882164	0.00520758	0.0902	T	C	0	0.003	0.8552
1	9	rs516902	rs324864	A	G	96719892	-4.253	2.11e-05	0.689643	A	G	-0.0120969	0.00338172	0.00034735	A	G	-0.0194627	0.00673215	0.003838	A	G	0.001	0.003	0.77
1	9	rs516902	rs321593	T	C	96720302	5.96	2.53e-09	0.995648	T	C	0.0114556	0.00299478	0.000130664	T	C	0.00896633	0.00520693	0.08503	T	C	0	0.003	0.8465
1	9	rs516902	rs9662580	A	G	96724741	-5.96	2.52e-09	0.995648	A	G	-0.0118897	0.00299475	7.18143e-05	A	G	-0.00916993	0.00520723	0.07817	A	G	-0.001	0.003	0.7826
1	9	rs516902	rs161996	C	T	96727795	NA	NA	0.978252	T	C	-0.00710541	0.00457215	0.12017	T	C	-0.0149346	0.00626713	0.01719	T	C	0	0.003	0.8582
1	9	rs516902	rs161998	T	G	96728392	-5.913	3.36e-09	0.995648	T	G	-0.0117545	0.00299502	8.68466e-05	T	G	-0.00889492	0.0052078	0.08759	T	G	-0.001	0.003	0.7669
1	9	rs516902	rs504399	A	C	96732885	5.884	4.01e-09	0.995648	A	C	0.012789	0.00315024	4.91346e-05	A	C	0.0142472	0.00626528	0.02294	A	C	0	0.003	0.8883
1	9	rs516902	rs644590	A	T	96733579	5.951	2.66e-09	0.995648	A	T	0.0114238	0.00299519	0.000136714	A	T	0.00891767	0.00520588	0.08679	A	T	0	0.003	0.8638
1	9	rs516902	rs660290	A	G	96734737	5.891	3.83e-09	0.991294	A	G	0.0127815	0.00314511	4.82542e-05	A	G	0.0134217	0.00626013	0.03205	A	G	0	0.003	0.8447
1	9	rs516902	rs675043	T	C	96735736	5.862	4.59e-09	0.991294	T	C	0.0126613	0.00314954	5.8189e-05	T	C	0.0131418	0.00626397	0.03593	T	C	0	0.003	0.8801
1	9	rs516902	rs321547	A	G	96738338	-5.869	4.39e-09	0.991294	A	G	-0.0132634	0.00314939	2.53792e-05	A	G	-0.0139494	0.00626096	0.0259	A	G	-0.001	0.003	0.8281
1	9	rs516902	rs324853	T	C	96738789	-4.775	1.8e-06	0.83601	T	C	-0.0118736	0.00325081	0.000259697	T	C	-0.0176973	0.00648491	0.006348	T	C	0.002	0.003	0.5454
1	9	rs516902	rs324854	T	C	96738972	-4.769	1.85e-06	0.83601	T	C	-0.0118592	0.00325139	0.000264867	T	C	-0.0176154	0.00648579	0.006608	T	C	0.002	0.003	0.5461
1	9	rs516902	rs9660195	A	T	96744164	-5.861	4.59e-09	0.991294	A	T	-0.0131519	0.00314944	2.96743e-05	A	T	-0.0136695	0.00626181	0.02902	A	T	-0.001	0.003	0.8034
1	9	rs516902	rs161989	A	G	96749714	5.861	4.6e-09	0.987022	A	G	0.011158	0.00299429	0.000194204	A	G	0.00868571	0.00520726	0.09529	A	G	0	0.003	0.9064
1	9	rs516902	rs161992	A	G	96754566	-5.788	7.11e-09	0.987022	A	G	-0.011045	0.00299432	0.000225447	A	G	-0.00861075	0.00520601	0.09818	A	G	0	0.003	0.8562
1	9	rs516902	rs11165579	A	G	96759720	-3.889	0.0001005	0.702016	A	G	-0.0108651	0.00335126	0.00118659	A	G	-0.0178793	0.00666889	0.007341	A	G	0.001	0.003	0.6724
1	9	rs516902	rs676097	A	G	96763824	5.738	9.59e-09	0.987022	A	G	0.0112554	0.00299432	0.000170647	A	G	0.00866549	0.00520763	0.0961	A	G	0.001	0.003	0.7985
1	9	rs516902	rs161671	A	C	96766417	NA	NA	0.759871	NA	NA	NA	NA	NA	A	C	0.0114311	0.00615235	0.06314	NA	NA	NA	NA	NA
1	9	rs516902	rs161987	A	G	96766802	5.633	1.77e-08	0.987022	A	G	0.0120496	0.00314391	0.000126762	A	G	0.013063	0.00626223	0.037	A	G	0	0.003	0.8828
1	9	rs516902	rs161985	A	G	96770685	5.691	1.27e-08	0.987022	A	G	0.0125214	0.00314864	6.98593e-05	A	G	0.0134744	0.00626425	0.0315	A	G	0.001	0.003	0.8024
1	9	rs516902	rs184470	T	C	96772320	5.661	1.51e-08	0.987022	T	C	0.0111942	0.00299376	0.000184629	T	C	0.00886371	0.00521088	0.08897	T	C	0.001	0.003	0.7895
1	9	rs516902	rs326651	T	C	96777210	5.68	1.34e-08	0.987022	T	C	0.0110552	0.00299372	0.000221804	T	C	0.00835623	0.00520638	0.1086	T	C	0.001	0.003	0.7361
1	9	rs516902	rs326653	A	T	96778004	-5.758	8.51e-09	0.987022	A	T	-0.0119638	0.00314998	0.000145832	A	T	-0.0132543	0.00626385	0.03434	A	T	0	0.003	0.8537
1	9	rs516902	rs326655	A	T	96780031	5.493	3.94e-08	0.928098	A	T	0.0124963	0.00310515	5.71228e-05	A	T	0.0125413	0.0057371	0.02885	A	T	0.001	0.003	0.6755
1	9	rs516902	rs10874997	T	G	96782403	-5.652	1.59e-08	0.987022	T	G	-0.0120387	0.00307071	8.8367e-05	T	G	-0.0115775	0.00567802	0.04149	T	G	-0.001	0.003	0.7961
1	9	rs516902	rs326679	T	C	96785035	-5.657	1.55e-08	0.987022	T	C	-0.0124736	0.00314864	7.44578e-05	T	C	-0.0133551	0.00626413	0.03299	T	C	-0.001	0.003	0.8033
1	9	rs516902	rs326678	A	G	96786632	5.665	1.47e-08	0.987022	A	G	0.0124255	0.00314858	7.93416e-05	A	G	0.0132176	0.00626425	0.03489	A	G	0.001	0.003	0.8019
1	9	rs516902	rs326674	T	C	96790933	5.656	1.55e-08	0.987022	T	C	0.0124655	0.00314862	7.52515e-05	T	C	0.0132608	0.00626398	0.03423	T	C	0.001	0.003	0.777
1	9	rs516902	rs326672	A	G	96795795	5.679	1.35e-08	0.987022	A	G	0.0109597	0.00299433	0.000252058	A	G	0.00845419	0.00520899	0.1046	A	G	0.001	0.003	0.7656
1	9	rs516902	rs326671	T	C	96797807	-5.679	1.35e-08	0.982721	T	C	-0.0109542	0.00299422	0.000253755	T	C	-0.00842147	0.00520808	0.1059	T	C	-0.001	0.003	0.7466
1	9	rs516902	rs149371	T	C	96799629	-5.684	1.31e-08	0.982721	T	C	-0.0109725	0.00299432	0.000247869	T	C	-0.00844229	0.00520808	0.105	T	C	-0.001	0.003	0.7548
1	9	rs516902	rs161795	A	G	96802577	-5.656	1.55e-08	0.987022	A	G	-0.0122435	0.00314892	0.000101014	A	G	-0.0130428	0.00626454	0.03734	A	G	-0.001	0.003	0.7799
1	9	rs516902	rs161982	C	G	96805998	5.637	1.73e-08	0.987022	C	G	0.0108664	0.00299412	0.000284257	C	G	0.00837421	0.00520784	0.1079	C	G	0.001	0.003	0.7618
1	9	rs516902	rs325953	T	C	96818456	-5.591	2.26e-08	0.961326	T	C	-0.0109449	0.00300155	0.000265923	T	C	-0.00881319	0.00522418	0.09168	T	C	-0.001	0.003	0.8247
1	9	rs516902	rs170533	T	G	96819655	-5.554	2.8e-08	0.956943	T	G	-0.0104869	0.00300179	0.000476651	T	G	-0.00729684	0.00522322	0.1623	T	G	-0.001	0.003	0.8295
1	9	rs516902	rs325951	A	G	96819907	-5.538	3.06e-08	0.956943	A	G	-0.0120324	0.00315701	0.000138217	A	G	-0.0129332	0.00628437	0.03955	A	G	-0.001	0.003	0.8264
1	9	rs516902	rs325950	A	C	96823086	-5.523	3.34e-08	0.956943	A	C	-0.0107709	0.00300264	0.000334302	A	C	-0.00817759	0.0052253	0.1176	A	C	-0.001	0.003	0.7928
1	9	rs516902	rs325947	A	C	96829870	5.495	3.9e-08	0.952789	A	C	0.0121311	0.00315774	0.000122174	A	C	0.0129122	0.00628638	0.03995	A	C	0.001	0.003	0.8301
1	9	rs516902	rs192990	A	G	96830775	-5.498	3.84e-08	0.952789	A	G	-0.012149	0.00315753	0.000119266	A	G	-0.0128966	0.00628489	0.04019	A	G	-0.001	0.003	0.8044
1	9	rs516902	rs600169	C	G	96835538	5.489	4.04e-08	0.948667	C	G	0.0115077	0.00315759	0.000267963	C	G	0.0123401	0.00628636	0.04968	C	G	0	0.003	0.8461
1	9	rs516902	rs11165604	T	C	96836700	-5.695	1.23e-08	0.882294	T	C	-0.0116299	0.00313468	0.000207213	T	C	-0.0118968	0.00624175	0.05662	T	C	-0.001	0.003	0.697
1	9	rs516902	rs6593592	T	C	96837661	5.951	2.67e-09	0.877346	T	C	0.0119061	0.00308105	0.000111413	T	C	0.0117629	0.00569632	0.03897	T	C	0.001	0.003	0.7971
1	9	rs516902	rs326918	T	G	96845432	NA	NA	0.820318	T	G	0.0105273	0.00461713	0.0226053	T	G	0.0161256	0.00632873	0.01083	T	G	0.003	0.003	0.3723
1	9	rs516902	rs111498374	T	C	96846851	NA	NA	0.877346	NA	NA	NA	NA	NA	T	C	0.0140894	0.00628432	0.02498	NA	NA	NA	NA	NA
1	9	rs516902	rs326911	A	G	96852354	-5.94	2.86e-09	0.877346	A	G	-0.0108444	0.00300431	0.000306627	A	G	-0.00931299	0.00522614	0.07482	A	G	0	0.003	0.8843
1	9	rs516902	rs167849	C	G	96854756	5.878	4.16e-09	0.877346	C	G	0.0107303	0.0030034	0.000353307	C	G	0.00913028	0.00522626	0.08066	C	G	0	0.003	0.8772
1	9	rs516902	rs326915	T	C	96857105	-5.413	6.19e-08	0.840452	T	C	-0.0114113	0.00314792	0.000288918	T	C	-0.013532	0.0062677	0.03084	T	C	0	0.003	0.9777
1	9	rs516902	rs632586	A	G	96861011	-5.35	8.77e-08	0.836573	A	G	-0.0103908	0.00299328	0.000517819	A	G	-0.00941202	0.00521153	0.07095	A	G	0	0.003	0.9674
1	9	rs516902	rs633343	T	C	96861540	5.374	7.7e-08	0.83312	T	C	0.010283	0.00299333	0.000591905	T	C	0.00899823	0.00521032	0.0841	T	C	0	0.003	0.9251
1	9	rs516902	rs1222580	T	C	96861720	5.391	7e-08	0.841102	T	C	0.011319	0.00314811	0.000323771	T	C	0.0131091	0.0062663	0.03641	T	C	0	0.003	0.962
1	9	rs516902	rs662350	C	G	96863198	5.377	7.56e-08	0.844991	C	G	0.0102917	0.00299363	0.000586301	C	G	0.00917907	0.00521242	0.07817	C	G	0	0.003	0.9956
1	9	rs516902	rs567440	T	G	96870599	-5.149	2.61e-07	0.836984	T	G	-0.00980644	0.00299539	0.00106097	T	G	-0.00855324	0.00520586	0.1005	T	G	0	0.003	0.9872
1	10	rs407102	rs600806	A	G	109840629	-6.223	4.87e-10	0.812455	A	G	-0.0219968	0.00333223	4.07781e-11	A	G	-0.0242761	0.00615676	8.049e-05	A	G	-0.01	0.003	0.000543
1	10	rs407102	rs681242	T	C	109841659	6.157	7.4e-10	0.796137	T	C	0.0209949	0.00345809	1.26923e-09	T	C	0.0216745	0.00686555	0.001595	T	C	0.01	0.003	0.0007907
1	10	rs407102	rs585545	A	T	109841662	6.065	1.32e-09	0.81724	A	T	0.0210685	0.00343723	8.81665e-10	A	T	0.0215888	0.00684055	0.001598	A	T	0.01	0.003	0.0005778
1	10	rs407102	rs680767	A	G	109841760	6.159	7.33e-10	0.796137	A	G	0.0211496	0.00347054	1.10102e-09	A	G	0.0219896	0.00686532	0.001359	A	G	0.01	0.003	0.000822
1	10	rs407102	rs680434	T	C	109842271	-6.028	1.66e-09	0.893789	T	C	-0.0201709	0.00329524	9.28645e-10	T	C	-0.0235902	0.0060878	0.0001068	T	C	-0.009	0.003	0.001598
1	10	rs407102	rs652651	A	G	109844532	6.132	8.65e-10	0.925963	A	G	0.0197803	0.00330971	2.28064e-09	A	G	0.0234916	0.00610805	0.00012	A	G	0.009	0.003	0.001032
1	10	rs407102	rs638542	A	G	109845252	-6.113	9.76e-10	0.925371	A	G	-0.0198135	0.00330819	2.10855e-09	A	G	-0.023422	0.00610743	0.0001253	A	G	-0.009	0.003	0.0008446
1	10	rs407102	rs407102	T	C	109846278	-6.351	2.13e-10	1	T	C	-0.0208955	0.00328519	2.01077e-10	T	C	-0.0262626	0.0060485	1.415e-05	T	C	-0.009	0.003	0.001351
1	10	rs407102	rs592107	A	T	109848726	6.158	7.39e-10	0.934269	A	T	0.0197745	0.00331678	2.49223e-09	A	T	0.0230825	0.00610647	0.0001568	A	T	0.009	0.003	0.0006042
1	10	rs407102	rs417270	T	C	109849144	6.089	1.14e-09	0.929546	T	C	0.0195794	0.00338789	7.505e-09	T	C	0.021504	0.00673683	0.001414	T	C	0.01	0.003	0.0005024
1	10	rs407102	rs443345	A	G	109849254	6.081	1.2e-09	0.925371	A	G	0.0200946	0.00330409	1.18883e-09	A	G	0.0230988	0.00610755	0.0001556	A	G	0.01	0.003	0.0004998
1	10	rs407102	rs367586	A	C	109850122	-6.068	1.3e-09	0.9252	A	C	-0.0195681	0.00338793	7.65707e-09	A	C	-0.0214094	0.00673463	0.001477	A	C	-0.01	0.003	0.000468
1	10	rs10858096	rs413582	T	C	109851126	-4.789	1.68e-06	0.816929	T	C	-0.0183271	0.0029968	9.62234e-10	T	C	-0.0242105	0.00551744	1.145e-05	T	C	-0.008	0.003	0.002084
1	10	rs407102	rs444387	A	G	109851127	6.135	8.54e-10	0.929546	A	G	0.0196938	0.00330512	2.54473e-09	A	G	0.0230851	0.0060991	0.000154	A	G	0.009	0.003	0.0005915
1	10	rs407102	rs461200	A	G	109855404	-6.136	8.45e-10	0.934269	A	G	-0.0192975	0.00340108	1.39549e-08	A	G	-0.0218102	0.00673569	0.001204	A	G	-0.009	0.003	0.0006847
1	10	rs10858096	rs464218	A	G	109856306	-5.25	1.53e-07	0.996384	A	G	-0.0195125	0.00299751	7.53776e-11	A	G	-0.0242869	0.0055273	1.112e-05	A	G	-0.009	0.003	0.0003719
1	10	rs407102	rs370088	T	C	109858119	6.154	7.55e-10	0.934269	T	C	0.0198006	0.00331688	2.37794e-09	T	C	0.0231917	0.00610628	0.0001462	T	C	0.009	0.003	0.0005418
1	10	rs407102	rs3853498	T	C	109860144	6.106	1.02e-09	0.929546	T	C	0.0190699	0.00338817	1.81927e-08	T	C	0.0212923	0.00673805	0.001576	T	C	0.009	0.003	0.0006973
1	10	rs407102	rs3853500	T	C	109864269	6.149	7.81e-10	0.929546	T	C	0.0204816	0.00322171	2.05231e-10	T	C	0.0251221	0.00559761	7.18e-06	T	C	0.009	0.003	0.0006623
1	10	rs407102	rs3853501	A	G	109864374	-6.159	7.34e-10	0.929546	A	G	-0.0205616	0.00322167	1.7447e-10	A	G	-0.0252625	0.00560021	6.448e-06	A	G	-0.009	0.003	0.0006379
1	10	rs407102	rs3768497	T	C	109866230	6.208	5.36e-10	0.934269	T	C	0.0207882	0.00323411	1.29465e-10	T	C	0.0256363	0.00560479	4.785e-06	T	C	0.009	0.003	0.001174
1	10	rs407102	rs3768496	A	T	109866569	-6.21	5.3e-10	0.934269	A	T	-0.0207549	0.00323411	1.38537e-10	A	T	-0.025517	0.00560074	5.205e-06	A	T	-0.009	0.003	0.0005718
1	10	rs407102	rs12136140	A	G	109866844	-6.13	8.78e-10	0.929546	A	G	-0.0191608	0.00338807	1.55508e-08	A	G	-0.0214487	0.0067364	0.001453	A	G	-0.009	0.003	0.0009198
1	10	rs407102	rs12045346	A	G	109867892	6.176	6.58e-10	0.934269	A	G	0.0192065	0.00340122	1.63336e-08	A	G	0.021176	0.00673964	0.001679	A	G	0.009	0.003	0.001026
1	10	rs407102	rs11102969	A	G	109867929	-6.125	9.07e-10	0.929546	A	G	-0.0190015	0.00338772	2.03555e-08	A	G	-0.0210614	0.00673749	0.001775	A	G	-0.009	0.003	0.001006
1	10	rs407102	rs6695482	C	G	109870859	6.131	8.72e-10	0.929546	C	G	0.0205601	0.00322187	1.75451e-10	C	G	0.0252608	0.00559982	6.454e-06	C	G	0.009	0.003	0.0009611
1	10	rs407102	rs10745352	T	C	109871787	6.142	8.13e-10	0.929546	T	C	0.0205372	0.00322174	1.83499e-10	T	C	0.0251503	0.00559891	7.047e-06	T	C	0.009	0.003	0.000865
1	10	rs407102	rs11102971	T	C	109872370	-6.122	9.22e-10	0.929546	T	C	-0.0191307	0.00338831	1.64139e-08	T	C	-0.0213284	0.00673672	0.001547	T	C	-0.009	0.003	0.0008365
1	10	rs407102	rs10735238	A	T	109872882	6.173	6.68e-10	0.934269	A	T	0.0194482	0.00341039	1.17968e-08	A	T	0.0214789	0.00673954	0.00144	A	T	0.009	0.003	0.0008117
1	10	rs407102	rs61394658	A	G	109873290	4.812	1.49e-06	0.676028	A	G	0.0165613	0.0036855	7.0022e-06	A	G	0.0208701	0.00725411	0.004011	A	G	0.007	0.003	0.01785
1	10	rs407102	rs4970840	A	G	109873367	6.171	6.77e-10	0.934269	A	G	0.0192936	0.0034014	1.40932e-08	A	G	0.0215323	0.00673725	0.001395	A	G	0.009	0.003	0.0007829
1	10	rs407102	rs4970749	A	G	109873573	-6.128	8.92e-10	0.929546	A	G	-0.019105	0.00338831	1.71545e-08	A	G	-0.0212152	0.00673712	0.001641	A	G	-0.009	0.003	0.000823
1	10	rs407102	rs12046539	T	C	109875415	-6.179	6.43e-10	0.934269	T	C	-0.0193264	0.00340061	1.32178e-08	T	C	-0.0217888	0.0067374	0.001221	T	C	-0.009	0.003	0.0007542
1	10	rs407102	rs7550401	T	C	109876885	4.798	1.6e-06	0.676028	T	C	0.0165724	0.00368521	6.89197e-06	T	C	0.0208147	0.00725503	0.004124	T	C	0.007	0.003	0.01793
1	10	rs407102	rs10745353	A	G	109877506	6.156	7.47e-10	0.934269	A	G	0.0209171	0.0032429	1.11756e-10	A	G	0.0255479	0.0056026	5.126e-06	A	G	0.009	0.003	0.0008582
1	10	rs407102	rs4603158	T	C	109879549	-6.13	8.78e-10	0.929546	T	C	-0.0206074	0.00322191	1.59477e-10	T	C	-0.0253171	0.0055999	6.165e-06	T	C	-0.009	0.003	0.0008473
1	10	rs407102	rs4970841	C	G	109879892	-6.172	6.75e-10	0.929546	C	G	-0.0191822	0.00338933	1.51733e-08	C	G	-0.0213746	0.00673639	0.00151	C	G	-0.009	0.003	0.0007253
1	10	rs407102	rs4970842	A	G	109879949	6.123	9.16e-10	0.929546	A	G	0.019171	0.00338835	1.53232e-08	A	G	0.0213676	0.00673631	0.001515	A	G	0.009	0.003	0.001107
1	10	rs407102	rs11102972	T	C	109880721	-4.808	1.53e-06	0.676028	T	C	-0.0189346	0.00350412	6.53442e-08	T	C	-0.0270528	0.0060305	7.272e-06	T	C	-0.007	0.003	0.01965
1	10	rs407102	rs10858084	A	T	109882250	-6.122	9.26e-10	0.929546	A	T	-0.0206344	0.00322181	1.50754e-10	A	T	-0.0254507	0.00560095	5.513e-06	A	T	-0.009	0.003	0.0008283
1	10	rs407102	rs74584797	C	T	109883576	NA	NA	0.846517	NA	NA	NA	NA	NA	NA	NA	NA	NA	NA	NA	NA	NA	NA	NA
1	10	rs407102	rs2228604	T	G	109884775	6.153	7.6e-10	0.929546	T	G	0.0191283	0.00338838	1.64947e-08	T	G	0.0213134	0.00673621	0.001556	T	G	0.009	0.003	0.0007928
1	10	rs407102	rs11102973	T	G	109886310	6.194	5.87e-10	0.934269	T	G	0.0193818	0.00340126	1.20925e-08	T	G	0.0217451	0.00673849	0.001249	T	G	0.009	0.003	0.0008454
1	10	rs407102	rs11102974	A	G	109886371	-6.189	6.05e-10	0.934269	A	G	-0.0208301	0.00323415	1.18939e-10	A	G	-0.0256813	0.00559994	4.515e-06	A	G	-0.009	0.003	0.0008893
1	10	rs407102	rs7520048	T	C	109886395	-6.132	8.69e-10	0.929546	T	C	-0.0192096	0.0033881	1.4303e-08	T	C	-0.0215409	0.00673573	0.001382	T	C	-0.009	0.003	0.0008481
1	10	rs10858096	rs4970843	T	C	109887191	4.867	1.13e-06	0.816929	T	C	0.0188986	0.00292383	1.02212e-10	T	C	0.0224168	0.00506252	9.528e-06	T	C	0.007	0.002	0.002842
1	10	rs407102	rs10127790	T	C	109891133	-5.957	2.57e-09	0.890276	T	C	-0.0194039	0.00327991	3.29909e-09	T	C	-0.0217432	0.00606337	0.0003352	T	C	-0.009	0.003	0.001151
1	10	rs407102	rs3879447	T	C	109891403	-5.999	1.98e-09	0.890276	T	C	-0.0186064	0.00336383	3.17861e-08	T	C	-0.0189933	0.00668779	0.004518	T	C	-0.009	0.003	0.001281
1	10	rs407102	rs3879448	C	G	109891423	-6.022	1.72e-09	0.890276	C	G	-0.0200945	0.00319841	3.32835e-10	C	G	-0.023499	0.00555794	2.355e-05	C	G	-0.009	0.003	0.0012
1	10	rs407102	rs1278664	T	G	109893210	4.817	1.46e-06	0.664864	T	G	0.018978	0.00350548	6.1691e-08	T	G	0.0268293	0.00603176	8.678e-06	T	G	0.007	0.003	0.01751
1	10	rs407102	rs4970751	A	C	109896600	6.135	8.5e-10	0.9252	A	C	0.0206266	0.00322231	1.54186e-10	A	C	0.0252665	0.00560109	6.467e-06	A	C	0.009	0.003	0.000801
1	10	rs407102	rs11142	A	G	109897103	6.161	7.23e-10	0.929949	A	G	0.0210206	0.00324339	9.10892e-11	A	G	0.0256295	0.0056033	4.777e-06	A	G	0.009	0.003	0.0008157
1	10	rs407102	rs1030522	C	G	109900707	6.17	6.84e-10	0.924849	C	G	0.0207122	0.00321455	1.16936e-10	C	G	0.0248961	0.00559087	8.451e-06	C	G	0.009	0.003	0.0007205
1	10	rs407102	rs1963870	T	C	109901215	6.155	7.49e-10	0.934269	T	C	0.0194298	0.00340111	1.11155e-08	T	C	0.0221278	0.00674217	0.00103	T	C	0.009	0.003	0.0007257
1	10	rs407102	rs1963869	C	G	109901462	-6.217	5.07e-10	0.929546	C	G	-0.019193	0.00338821	1.47319e-08	C	G	-0.0215585	0.00673704	0.001373	C	G	-0.009	0.003	0.0005055
1	10	rs407102	rs3879449	A	T	109904971	6.138	8.34e-10	0.929546	A	T	0.0205648	0.00322174	1.73494e-10	A	T	0.0252753	0.00560427	6.47e-06	A	T	0.009	0.003	0.0008215
1	10	rs407102	rs3879450	T	C	109909149	-6.207	5.4e-10	0.929546	T	C	-0.0206874	0.00322101	1.33926e-10	T	C	-0.0253475	0.00560042	6.018e-06	T	C	-0.009	0.003	0.0007634
1	10	rs407102	rs3879451	T	C	109909269	-6.194	5.88e-10	0.929546	T	C	-0.0192801	0.00338743	1.25806e-08	T	C	-0.0215311	0.0067369	0.001395	T	C	-0.009	0.003	0.0007513
1	10	rs407102	rs10858085	A	G	109914983	6.202	5.56e-10	0.929949	A	G	0.0207803	0.00323418	1.31677e-10	A	G	0.0254775	0.00560191	5.427e-06	A	G	0.009	0.003	0.0007014
1	10	rs407102	rs10858086	A	C	109915075	-6.199	5.69e-10	0.929949	A	C	-0.0207557	0.00323466	1.39321e-10	A	C	-0.0254377	0.00560179	5.591e-06	A	C	-0.009	0.003	0.0007753
1	10	rs407102	rs10858087	A	T	109916890	-6.06	1.36e-09	0.896932	A	T	-0.0197131	0.00338828	5.95418e-09	A	T	-0.0219329	0.00672582	0.00111	A	T	-0.01	0.003	0.000311
1	10	rs407102	rs11102976	C	G	109917540	-6.192	5.94e-10	0.929949	C	G	-0.019342	0.00340133	1.29593e-08	C	G	-0.0218632	0.00673958	0.001179	C	G	-0.009	0.003	0.0007758
1	10	rs407102	rs12037677	T	C	109918766	NA	NA	0.929949	T	C	0.0195024	0.00491645	7.28535e-05	T	C	0.0218201	0.00673875	0.001205	T	C	0.009	0.003	0.001034
1	10	rs407102	rs10858088	T	C	109923586	-6.157	7.44e-10	0.9252	T	C	-0.0192334	0.00338877	1.3818e-08	T	C	-0.0215686	0.00673808	0.001371	T	C	-0.009	0.003	0.0007983
1	10	rs407102	rs10858089	T	C	109926828	6.155	7.51e-10	0.9252	T	C	0.0205435	0.00322231	1.82474e-10	T	C	0.025076	0.00560107	7.58e-06	T	C	0.009	0.003	0.000811
1	10	rs407102	rs3879452	A	G	109929237	-6.133	8.63e-10	0.9252	A	G	-0.019182	0.00338828	1.50247e-08	A	G	-0.0214887	0.00673839	0.001426	A	G	-0.009	0.003	0.0007787
1	10	rs407102	rs10858090	A	G	109930498	6.184	6.24e-10	0.929949	A	G	0.0195475	0.00341065	9.96439e-09	A	G	0.0217723	0.00674064	0.001239	A	G	0.009	0.003	0.0009275
1	10	rs407102	rs4970752	T	C	109930852	-6.131	8.75e-10	0.9252	T	C	-0.0205101	0.00322097	1.91908e-10	T	C	-0.025137	0.00560094	7.192e-06	T	C	-0.009	0.003	0.0006507
1	10	rs407102	rs10745354	T	C	109931908	-6.141	8.18e-10	0.9252	T	C	-0.0205182	0.00322181	1.90837e-10	T	C	-0.0251024	0.00560196	7.431e-06	T	C	-0.009	0.003	0.000779
1	10	rs407102	rs2115786	C	T	109933422	NA	NA	0.851902	NA	NA	NA	NA	NA	T	C	-0.0203946	0.00676215	0.002561	NA	NA	NA	NA	NA
1	10	rs407102	rs3768495	T	C	109935325	-6.161	7.25e-10	0.9252	T	C	-0.0191981	0.00338859	1.46596e-08	T	C	-0.0212624	0.00673929	0.001603	T	C	-0.009	0.003	0.0007354
1	10	rs407102	rs3768494	A	G	109935427	6.225	4.82e-10	0.929949	A	G	0.0207604	0.00323497	1.38537e-10	A	G	0.0253104	0.00560212	6.229e-06	A	G	0.009	0.003	0.0007373
1	10	rs407102	rs3768493	T	C	109935505	-6.161	7.22e-10	0.9252	T	C	-0.0205814	0.00322218	1.68693e-10	T	C	-0.0250832	0.00560143	7.544e-06	T	C	-0.009	0.003	0.0007
1	10	rs407102	rs10858091	T	C	109935578	6.161	7.22e-10	0.9252	T	C	0.0205842	0.00322218	1.67748e-10	T	C	0.0250999	0.0056014	7.439e-06	T	C	0.009	0.003	0.0006998
1	10	rs407102	rs2140924	A	C	109935775	6.225	4.8e-10	0.929949	A	C	0.019444	0.00340209	1.09512e-08	A	C	0.0218397	0.00673856	0.00119	A	C	0.009	0.003	0.0007036
1	10	rs407102	rs6537757	A	G	109936682	-6.223	4.87e-10	0.929949	A	G	-0.0194755	0.00340209	1.03689e-08	A	G	-0.021975	0.00673666	0.001106	A	G	-0.009	0.003	0.0007312
1	10	rs407102	rs1343465	T	C	109937426	6.159	7.32e-10	0.9252	T	C	0.0192557	0.00338866	1.32832e-08	T	C	0.0215408	0.00673782	0.00139	T	C	0.009	0.003	0.0007002
1	10	rs407102	rs12711447	T	C	109937916	-6.229	4.71e-10	0.929949	T	C	-0.0193956	0.00340267	1.19733e-08	T	C	-0.0213934	0.00673808	0.001498	T	C	-0.009	0.003	0.000585
1	10	rs407102	rs12711448	T	C	109937931	-6.181	6.37e-10	0.9252	T	C	-0.0192608	0.00339007	1.3349e-08	T	C	-0.0212532	0.00673421	0.001599	T	C	-0.009	0.003	0.0006412
1	10	rs407102	rs72646553	C	G	109940503	4.709	2.49e-06	0.664864	C	G	0.0165501	0.00368509	7.08597e-06	C	G	0.020209	0.00725636	0.005353	C	G	0.007	0.003	0.01577
1	10	rs407102	rs1880670	T	C	109941133	-6.163	7.16e-10	0.9252	T	C	-0.0205763	0.00322224	1.70597e-10	T	C	-0.0250903	0.00560175	7.483e-06	T	C	-0.009	0.003	0.0007273
1	10	rs407102	rs10858092	T	C	109943893	-6.162	7.17e-10	0.9252	T	C	-0.0204965	0.00322231	2.00693e-10	T	C	-0.0248752	0.00560127	8.955e-06	T	C	-0.009	0.003	0.0007062
1	10	rs407102	rs7518013	T	C	109944078	6.233	4.58e-10	0.929949	T	C	0.0205963	0.00326878	2.95898e-10	T	C	0.0251269	0.00579761	1.467e-05	T	C	0.009	0.003	0.0006991
1	10	rs407102	rs4970846	A	C	109946095	6.346	2.21e-10	0.920478	A	C	0.0190635	0.00332668	1.00141e-08	A	C	0.0219802	0.00673414	0.001097	A	C	0.009	0.003	0.0006764
1	10	rs407102	rs2152925	T	C	109946882	6.235	4.51e-10	0.929949	T	C	0.0194218	0.00340223	1.13946e-08	T	C	0.021834	0.0067389	0.001195	T	C	0.009	0.003	0.000736
1	10	rs407102	rs4120621	A	G	109949008	6.234	4.54e-10	0.929949	A	G	0.0207123	0.00323484	1.52461e-10	A	G	0.0253326	0.00560208	6.112e-06	A	G	0.009	0.003	0.0007144
1	10	rs407102	rs10858094	T	C	109950858	6.174	6.65e-10	0.9252	T	C	0.0205619	0.00322258	1.76438e-10	T	C	0.0250997	0.00560136	7.418e-06	T	C	0.009	0.003	0.0007063
1	10	rs407102	rs10745355	T	C	109951711	6.224	4.83e-10	0.929949	T	C	0.0194239	0.00340209	1.13382e-08	T	C	0.0219075	0.00673661	0.001146	T	C	0.009	0.003	0.0007035
1	10	rs407102	rs10776806	A	G	109952127	-6.279	3.41e-10	0.929949	A	G	-0.0193832	0.00340202	1.21525e-08	A	G	-0.0218342	0.00673894	0.001194	A	G	-0.009	0.003	0.0007216
1	10	rs407102	rs2303875	A	C	109955010	-6.224	4.84e-10	0.929949	A	C	-0.020943	0.00324346	1.068e-10	A	C	-0.0255214	0.0056091	5.372e-06	A	C	-0.009	0.003	0.0008215
1	10	rs407102	rs10776807	A	G	109956156	-6.347	2.19e-10	0.9252	A	G	-0.0205838	0.00322341	1.70597e-10	A	G	-0.0252298	0.00560164	6.654e-06	A	G	-0.009	0.003	0.0006784
1	10	rs407102	rs1465607	T	C	109958035	6.246	4.21e-10	0.929949	T	C	0.0207481	0.00323522	1.42498e-10	T	C	0.0253293	0.00560134	6.114e-06	T	C	0.009	0.003	0.0007257
1	10	rs407102	rs10745356	A	C	109960270	-6.247	4.18e-10	0.929949	A	C	-0.0195461	0.00340238	9.20089e-09	A	C	-0.0222456	0.00673906	0.0009649	A	C	-0.009	0.003	0.0007054
1	10	rs407102	rs7555732	A	G	109961935	4.875	1.09e-06	0.664864	A	G	0.0168655	0.00368674	4.77024e-06	A	G	0.0215566	0.00726545	0.00301	A	G	0.007	0.003	0.01667
1	10	rs407102	rs7551176	T	C	109961965	-6.236	4.48e-10	0.929949	T	C	-0.0208287	0.00323522	1.20975e-10	T	C	-0.0256282	0.00560914	4.892e-06	T	C	-0.009	0.003	0.0006418
1	10	rs407102	rs10858095	C	G	109962642	-6.199	5.69e-10	0.9252	C	G	-0.0207097	0.00322362	1.32423e-10	C	G	-0.0254957	0.005601	5.306e-06	C	G	-0.009	0.003	0.0007002
1	10	rs407102	rs12024582	A	G	109965256	-6.257	3.93e-10	0.929949	A	G	-0.0195115	0.00340234	9.76793e-09	A	G	-0.0222296	0.00673828	0.0009702	A	G	-0.009	0.003	0.0005613
1	10	rs407102	rs3768491	A	G	109965986	6.17	6.81e-10	0.9252	A	G	0.0193817	0.00338919	1.07359e-08	A	G	0.0220541	0.0067382	0.001065	A	G	0.009	0.003	0.0009138
1	10	rs407102	rs3931560	A	C	109966718	6.19	6.03e-10	0.9252	A	C	0.02072	0.00322264	1.28011e-10	A	C	0.0255589	0.00560134	5.044e-06	A	C	0.009	0.003	0.0007138
1	10	rs10858096	rs10858096	A	C	109967104	-5.453	4.96e-08	1	A	C	-0.0212039	0.00299613	1.47225e-12	A	C	-0.0233138	0.00552459	2.44e-05	A	C	-0.009	0.002	0.0004103
1	10	rs407102	rs11102981	G	C	109967323	NA	NA	0.9252	C	G	-0.0200001	0.00490325	4.52419e-05	C	G	-0.0229172	0.0067206	0.0006488	C	G	-0.009	0.003	0.001424
1	10	rs407102	rs10858097	C	A	109967324	NA	NA	0.929949	A	C	-0.0200549	0.00490415	4.32542e-05	A	C	-0.0230289	0.00672181	0.0006125	A	C	-0.009	0.003	0.0007697
1	10	rs10858096	rs3820667	A	C	109968410	5.417	6.05e-08	0.992769	A	C	0.0202315	0.00292069	4.30001e-12	A	C	0.0205274	0.00506474	5.057e-05	A	C	0.009	0.002	0.0003349
1	10	rs407102	rs4970754	A	G	109969721	6.117	9.53e-10	0.920478	A	G	0.0188513	0.00338231	2.49667e-08	A	G	0.0211262	0.00672166	0.001674	A	G	0.009	0.003	0.0005829
1	10	rs407102	rs1149168	A	G	109973387	4.849	1.24e-06	0.664864	A	G	0.0188522	0.00350615	7.57794e-08	A	G	0.0264726	0.00603295	1.143e-05	A	G	0.007	0.003	0.01939
1	10	rs407102	rs12073497	A	C	109974450	6.171	6.81e-10	0.9252	A	C	0.0206383	0.00323673	1.81453e-10	A	C	0.0250278	0.00558907	7.544e-06	A	C	0.009	0.003	0.0006468
1	10	rs407102	rs4970756	C	G	109976775	6.081	1.19e-09	0.897538	NA	NA	NA	NA	NA	NA	NA	NA	NA	NA	NA	NA	NA	NA	NA
1	10	rs407102	rs1291916	T	C	109978034	-6.023	1.71e-09	0.897538	T	C	-0.0190097	0.00338002	1.8643e-08	T	C	-0.0211554	0.00671388	0.001628	T	C	-0.009	0.003	0.0008715
1	10	rs407102	rs4970729	A	G	109979202	-6.074	1.25e-09	0.897538	A	G	-0.0203682	0.00321254	2.29469e-10	A	G	-0.0247928	0.00558018	8.857e-06	A	G	-0.009	0.003	0.0005499
1	10	rs407102	rs4970730	T	C	109979526	6.061	1.35e-09	0.902113	T	C	0.0192026	0.00339191	1.50247e-08	T	C	0.021459	0.00671433	0.001394	T	C	0.009	0.003	0.0004859
1	10	rs407102	rs4970758	A	G	109979617	6.067	1.3e-09	0.902113	A	G	0.0191815	0.00339174	1.55508e-08	A	G	0.0214529	0.00671031	0.00139	A	G	0.009	0.003	0.0004305
1	10	rs407102	rs4970759	A	C	109982213	-6.108	1.01e-09	0.897936	A	C	-0.0203065	0.00323435	3.42156e-10	A	C	-0.0239884	0.00559823	1.829e-05	A	C	-0.009	0.003	0.0007784
1	10	rs407102	rs4970760	A	G	109985439	6.085	1.17e-09	0.897936	A	G	0.0204445	0.00323466	2.6081e-10	A	G	0.0242338	0.00559931	1.502e-05	A	G	0.009	0.003	0.0007463
1	10	rs407102	rs6664236	A	C	109986672	-6.04	1.54e-09	0.893355	A	C	-0.0203019	0.00322218	2.96319e-10	A	C	-0.0241359	0.00559867	1.622e-05	A	C	-0.009	0.003	0.0008339
1	10	rs407102	rs2043059	A	C	109991009	-5.861	4.61e-09	0.786764	A	C	-0.0186262	0.00334661	2.61133e-08	A	C	-0.018895	0.00664382	0.004453	A	C	-0.01	0.003	0.000314
1	10	rs407102	rs2039694	A	G	109991700	5.861	4.59e-09	0.786764	A	G	0.0199817	0.00318271	3.42489e-10	A	G	0.0230778	0.00552497	2.952e-05	A	G	0.01	0.003	0.0002969
1	10	rs407102	rs4970761	T	C	109995398	-5.843	5.13e-09	0.777742	T	C	-0.0201071	0.00318222	2.63984e-10	T	C	-0.023482	0.00552777	2.152e-05	T	C	-0.01	0.003	0.0002387
1	10	rs407102	rs4970731	T	C	109995459	5.896	3.73e-09	0.790751	T	C	0.0189688	0.00335626	1.58805e-08	T	C	0.0198702	0.00664332	0.002778	T	C	0.01	0.003	0.0002627
1	10	rs407102	rs9787176	A	C	109996689	-5.826	5.66e-09	0.786764	A	C	-0.0187311	0.00334718	2.19273e-08	A	C	-0.0191544	0.0066462	0.003952	A	C	-0.01	0.003	0.0002286
1	10	rs407102	rs9787177	A	C	109996734	-5.86	4.63e-09	0.786764	A	C	-0.0187311	0.00334718	2.19273e-08	A	C	-0.0191569	0.00664708	0.003952	A	C	-0.01	0.003	0.0002681
1	10	rs407102	rs11102984	T	C	109997373	5.862	4.57e-09	0.786764	T	C	0.018813	0.00334718	1.90361e-08	T	C	0.0194974	0.00664761	0.003355	T	C	0.01	0.003	0.0003093
1	10	rs407102	rs12140694	T	C	109998386	-5.863	4.55e-09	0.786764	T	C	-0.0187337	0.00334715	2.18209e-08	T	C	-0.0191543	0.0066462	0.003955	T	C	-0.01	0.003	0.0002898
1	10	rs407102	rs1933182	A	C	109999838	5.86	4.62e-09	0.786764	A	C	0.0199657	0.00318277	3.54023e-10	A	C	0.0229928	0.00552446	3.151e-05	A	C	0.01	0.003	0.0002866
1	10	rs407102	rs10745357	C	G	110001876	-5.85	4.93e-09	0.786764	C	G	-0.0188144	0.00334744	1.90361e-08	C	G	-0.0197401	0.00664649	0.002982	C	G	-0.01	0.003	0.0002405
1	10	rs407102	rs891380	T	G	110003286	5.885	3.98e-09	0.790751	T	G	0.0188858	0.00335662	1.83958e-08	T	G	0.0197873	0.00664673	0.002912	T	G	0.01	0.003	0.0002409
1	10	rs407102	rs6693932	T	C	110003575	5.893	3.8e-09	0.786695	T	C	0.0202172	0.00319183	2.38831e-10	T	C	0.0236857	0.00552243	1.791e-05	T	C	0.01	0.003	0.000258
1	10	rs407102	rs891379	A	G	110003605	5.894	3.77e-09	0.786695	A	G	0.0188979	0.00335675	1.80393e-08	A	G	0.0197194	0.00664399	0.002999	A	G	0.01	0.003	0.0002483
1	10	rs407102	rs2115787	T	G	110003840	5.888	3.9e-09	0.790751	T	G	0.0188184	0.00335672	2.06826e-08	T	G	0.0195193	0.00664827	0.003328	T	G	0.01	0.003	0.0002469
1	10	rs10858096	rs4970762	C	G	110004543	-5.233	1.67e-07	0.881308	C	G	-0.0201513	0.00306885	5.15517e-11	C	G	-0.0177082	0.0060853	0.003613	C	G	-0.01	0.002	0.000117
1	10	rs407102	rs2140923	T	C	110004990	-5.86	4.63e-09	0.786764	T	C	-0.0188282	0.00334738	1.85766e-08	T	C	-0.0198943	0.00664693	0.002758	T	C	-0.01	0.003	0.0002556
1	10	rs407102	rs4970763	A	G	110006349	-5.96	2.52e-09	0.790751	A	G	-0.0189387	0.00335645	1.67613e-08	A	G	-0.0200001	0.00664677	0.002622	A	G	-0.01	0.003	0.0002415
1	10	rs407102	rs4246517	C	G	110007636	-5.874	4.25e-09	0.786764	C	G	-0.0202318	0.00318292	2.06584e-10	C	G	-0.0240131	0.00552407	1.379e-05	C	G	-0.01	0.003	0.0002516
1	10	rs407102	rs2884752	A	G	110008651	-5.934	2.96e-09	0.790751	A	G	-0.0190184	0.00335652	1.4607e-08	A	G	-0.0202356	0.00664552	0.002325	A	G	-0.01	0.003	0.0002586
1	10	rs407102	rs2359652	A	T	110008720	-5.835	5.39e-09	0.790751	A	T	-0.0190008	0.00335541	1.48974e-08	A	T	-0.0202081	0.00664522	0.002358	A	T	-0.01	0.003	0.0002821
1	10	rs407102	rs11101960	T	C	110008778	-5.895	3.75e-09	0.786764	T	C	-0.0189103	0.00334741	1.61162e-08	T	C	-0.0201182	0.00664625	0.002471	T	C	-0.01	0.003	0.0002698
1	10	rs407102	rs11101961	T	C	110008813	5.933	2.97e-09	0.790751	T	C	0.0190014	0.00335652	1.50447e-08	T	C	0.0201734	0.00664693	0.002407	T	C	0.01	0.003	0.0002617
1	10	rs10858096	rs4970764	C	G	110009106	4.645	3.4e-06	0.721679	C	G	0.0163163	0.00307986	1.17246e-07	C	G	0.0182187	0.00610136	0.002822	C	G	0.008	0.003	0.0008497
1	10	rs407102	rs4970765	T	C	110009171	-5.926	3.1e-09	0.790751	T	C	-0.0189956	0.00335649	1.51934e-08	T	C	-0.0201807	0.00664714	0.002394	T	C	-0.01	0.003	0.000258
1	10	rs407102	rs2787015	A	C	110009434	6.011	1.84e-09	0.790751	A	C	0.0190509	0.00336175	1.45352e-08	A	C	0.0205495	0.00664818	0.001996	A	C	0.01	0.003	0.0003549
1	10	rs407102	rs10857786	C	G	110010110	5.936	2.92e-09	0.790751	C	G	0.0190128	0.00335652	1.47515e-08	C	G	0.0201874	0.00664714	0.002391	C	G	0.01	0.003	0.0002301
1	10	rs407102	rs10857787	T	C	110010289	-5.963	2.48e-09	0.790751	T	C	-0.0203767	0.00318892	1.66039e-10	T	C	-0.0241793	0.00552039	1.184e-05	T	C	-0.01	0.003	0.0002058
1	10	rs407102	rs1525916	A	G	110010949	5.984	2.18e-09	0.790751	A	G	0.020393	0.00318889	1.60535e-10	A	G	0.024226	0.00551971	1.136e-05	A	G	0.01	0.003	0.0002304
1	10	rs407102	rs2152924	A	G	110011701	-5.925	3.12e-09	0.790751	A	G	-0.0205332	0.00318175	1.0936e-10	A	G	-0.0245544	0.00551909	8.647e-06	A	G	-0.01	0.003	0.0002082
1	10	rs407102	rs1368988	A	T	110012123	5.604	2.09e-08	0.790751	NA	NA	NA	NA	NA	A	T	0.019307	0.00663016	0.003593	NA	NA	NA	NA	NA
1	10	rs407102	rs10745305	A	G	110012148	5.974	2.31e-09	0.790751	A	G	0.0189925	0.00335395	1.48974e-08	A	G	0.019664	0.00663652	0.003042	A	G	0.01	0.003	0.0002099
1	10	rs407102	rs10857788	A	G	110012289	-5.946	2.75e-09	0.785795	A	G	-0.0191309	0.00335388	1.16961e-08	A	G	-0.0203105	0.00665265	0.002268	A	G	-0.01	0.003	0.0001149
1	10	rs407102	rs10857789	T	C	110012293	-5.924	3.15e-09	0.785795	T	C	-0.0190948	0.00334607	1.15235e-08	T	C	-0.0203065	0.00665134	0.002263	T	C	-0.01	0.003	9.164e-05
1	10	rs407102	rs12137189	A	G	110013215	5.913	3.36e-09	0.786764	A	G	0.0189212	0.00333837	1.44638e-08	A	G	0.0197846	0.00663914	0.002881	A	G	0.01	0.003	0.0001941
1	10	rs407102	rs10776698	T	C	110013630	-5.869	4.4e-09	0.786764	T	C	-0.0187163	0.003338	2.05821e-08	T	C	-0.0192956	0.0066399	0.003665	T	C	-0.01	0.003	0.0001957
1	10	rs407102	rs4970766	T	C	110013955	-5.909	3.44e-09	0.790751	T	C	-0.0203527	0.00318131	1.5785e-10	T	C	-0.0242205	0.00551972	1.144e-05	T	C	-0.01	0.003	0.0001834
1	10	rs407102	rs12136063	A	G	110014170	-5.866	4.46e-09	0.786764	A	G	-0.0201152	0.00317445	2.34873e-10	A	G	-0.0237969	0.00551492	1.593e-05	A	G	-0.01	0.003	0.0001791
1	10	rs407102	rs11101962	A	T	110014187	5.927	3.08e-09	0.790751	A	T	0.0188055	0.00335391	2.05821e-08	A	T	0.0194621	0.00663557	0.003356	A	T	0.01	0.003	0.0002003
1	10	rs407102	rs518697	A	G	110014778	-5.953	2.63e-09	0.790751	A	G	-0.0188782	0.00335375	1.81278e-08	A	G	-0.0194877	0.00663974	0.003337	A	G	-0.01	0.003	0.0002091
1	10	rs407102	rs529091	A	C	110014975	-5.957	2.57e-09	0.790751	A	C	-0.0188863	0.00335369	1.78636e-08	A	C	-0.0194879	0.00663982	0.003334	A	C	-0.01	0.003	0.0002277
1	10	rs407102	rs4970767	A	G	110015183	-5.957	2.56e-09	0.790751	A	G	-0.0202893	0.00318895	1.98656e-10	A	G	-0.0238064	0.00551968	1.61e-05	A	G	-0.01	0.003	0.0002281
1	10	rs407102	rs12753439	A	G	110015519	-5.903	3.58e-09	0.786764	A	G	-0.0187427	0.00333819	1.96981e-08	A	G	-0.0193065	0.0066391	0.003638	A	G	-0.01	0.003	0.0002152
1	10	rs407102	rs10494040	T	C	110015732	-5.96	2.52e-09	0.790751	T	C	-0.0203006	0.003189	1.94259e-10	T	C	-0.0238614	0.00551964	1.539e-05	T	C	-0.01	0.003	0.0002339
1	10	rs407102	rs2359653	A	G	110016378	6.033	1.61e-09	0.790751	A	G	0.0189003	0.00335365	1.74316e-08	A	G	0.0195144	0.0066398	0.00329	A	G	0.01	0.003	0.0001045
1	10	rs407102	rs9429519	A	G	110017105	-5.913	3.36e-09	0.786764	A	G	-0.0187126	0.00333784	2.06826e-08	A	G	-0.0194097	0.00663807	0.003451	A	G	-0.01	0.003	0.0002009
1	10	rs407102	rs491285	T	C	110019002	5.947	2.73e-09	0.786764	T	C	0.0202091	0.00318883	2.33568e-10	T	C	0.0237772	0.00551932	1.649e-05	T	C	0.01	0.003	0.0002308
1	10	rs407102	rs9661614	T	C	110021837	-6.007	1.89e-09	0.790751	T	C	-0.0202497	0.00317288	1.74642e-10	T	C	-0.0238547	0.00551299	1.51e-05	T	C	-0.01	0.003	0.0001428
1	10	rs407102	rs12145677	A	G	110023610	5.99	2.1e-09	0.790751	A	G	0.0202341	0.0031777	1.92097e-10	A	G	0.0238109	0.00551433	1.576e-05	A	G	0.01	0.003	0.0001281
1	10	rs2091329	rs2781552	A	G	110025881	-6.171	6.79e-10	0.783893	A	G	-0.0195445	0.00315704	5.98737e-10	A	G	-0.0236591	0.00547538	1.556e-05	A	G	-0.009	0.003	0.001035
1	10	rs2091329	rs573491	T	G	110026891	-6.179	6.45e-10	0.783893	T	G	-0.0184263	0.00332012	2.8588e-08	T	G	-0.0208283	0.00659539	0.001589	T	G	-0.009	0.003	0.0009223
1	10	rs2091329	rs2781553	T	G	110026989	6.187	6.14e-10	0.774057	T	G	0.0198577	0.00318818	4.70768e-10	T	G	0.0241647	0.00547828	1.029e-05	T	G	0.009	0.003	0.001141
1	10	rs2091329	rs1144594	T	C	110029475	6.152	7.65e-10	0.779317	T	C	0.0196163	0.00318277	7.12531e-10	T	C	0.0234663	0.00548151	1.857e-05	T	C	0.009	0.003	0.0009983
1	10	rs2091329	rs1144593	A	G	110030945	-6.194	5.86e-10	0.779317	A	G	-0.0200713	0.00318174	2.8217e-10	A	G	-0.0234516	0.00548192	1.886e-05	A	G	-0.01	0.003	0.0004121
1	10	rs2091329	rs1278847	A	C	110037483	6.044	1.5e-09	0.80296	A	C	0.0187076	0.00331784	1.71545e-08	A	C	0.0214855	0.00658661	0.001105	A	C	0.009	0.003	0.000572
1	10	rs2091329	rs749056	T	G	110037838	-6.094	1.1e-09	0.80296	T	G	-0.0195017	0.00315495	6.35695e-10	T	G	-0.0234411	0.00547434	1.85e-05	T	G	-0.009	0.003	0.0003527
1	10	rs2091329	rs6666119	A	G	110040310	-5.938	2.88e-09	0.801432	A	G	-0.0198942	0.00317051	3.50142e-10	A	G	-0.0234475	0.00547456	1.844e-05	A	G	-0.01	0.003	0.0001718
1	10	rs10858096	rs2297797	T	C	110040680	-4.373	1.22e-05	0.6106	T	C	-0.0162215	0.00300499	6.73123e-08	T	C	-0.0187085	0.00553179	0.0007203	T	C	-0.009	0.003	0.0003125
1	10	rs2091329	rs2091329	A	G	110042079	-5.597	2.18e-08	1	A	G	-0.0174784	0.0033544	1.88254e-07	A	G	-0.0180036	0.00667049	0.006948	A	G	-0.009	0.003	0.001411
1	10	rs2091329	rs579652	A	G	110044375	-5.267	1.39e-07	0.935787	A	G	-0.0164459	0.00333663	8.26918e-07	A	G	-0.0154632	0.00663087	0.01972	A	G	-0.008	0.003	0.00187
1	10	rs2091329	rs580522	A	G	110044458	-5.236	1.64e-07	0.926279	A	G	-0.0171105	0.00335776	3.47287e-07	A	G	-0.0164489	0.00664065	0.01326	A	G	-0.009	0.003	0.001451
1	10	rs2091329	rs527277	A	G	110046093	5.489	4.05e-08	0.948678	A	G	0.0180757	0.00340289	1.08512e-07	A	G	0.0197932	0.00669368	0.003103	A	G	0.009	0.003	0.001411
1	10	rs2091329	rs575113	A	G	110046373	5.514	3.5e-08	0.929337	A	G	0.0180994	0.0033837	8.84436e-08	A	G	0.0200199	0.00667774	0.002719	A	G	0.009	0.003	0.001029
1	10	rs2091329	rs14184	C	G	110047110	-5.295	1.19e-07	0.916841	C	G	-0.0177255	0.0032774	6.35829e-08	C	G	-0.0181672	0.00601961	0.002544	C	G	-0.009	0.003	0.001078
1	10	rs2091329	rs3738772	A	C	110048436	5.582	2.38e-08	0.953217	A	C	0.0188869	0.0032239	4.67356e-09	A	C	0.0212737	0.00556322	0.0001311	A	C	0.009	0.003	0.001185
1	10	rs2091329	rs3738773	A	G	110048527	5.577	2.44e-08	0.953217	A	G	0.0188407	0.00322452	5.12877e-09	A	G	0.020923	0.00556314	0.0001689	A	G	0.009	0.003	0.001463
1	11	rs112780312	rs10752613	A	T	153760104	-4.966	6.83e-07	0.736327	A	T	-0.01328	0.00329252	5.49795e-05	A	T	-0.00972574	0.006071	0.1093	A	T	-0.008	0.003	0.002946
1	11	rs112780312	rs11583896	A	G	153768982	-5.169	2.35e-07	0.825038	A	G	-0.0142346	0.00318511	7.85411e-06	A	G	-0.0126272	0.00550684	0.02183	A	G	-0.007	0.003	0.008533
1	11	rs112780312	rs4077168	A	T	153775017	5.212	1.87e-07	0.841138	A	T	0.0147131	0.00318337	3.80348e-06	A	T	0.0131167	0.00550657	0.01722	A	T	0.008	0.003	0.004821
1	11	rs112780312	rs113422987	T	C	153787279	-5.184	2.18e-07	0.849459	T	C	-0.0142455	0.00334763	2.08692e-05	T	C	-0.0105817	0.00662185	0.1101	T	C	-0.008	0.003	0.00467
1	11	rs112780312	rs72694220	T	C	153788211	5.148	2.63e-07	0.849459	T	C	0.0141542	0.00334811	2.36271e-05	T	C	0.0103464	0.00662382	0.1182	T	C	0.008	0.003	0.00464
1	11	rs112780312	rs4363451	T	C	153790501	-5.146	2.66e-07	0.849459	T	C	-0.0146633	0.00318325	4.09733e-06	T	C	-0.0132467	0.00550571	0.01615	T	C	-0.008	0.003	0.004803
1	11	rs112780312	rs10796956	T	C	153795569	5.439	5.37e-08	0.869502	T	C	0.0148164	0.0031732	3.02333e-06	T	C	0.0131998	0.00549304	0.01627	T	C	0.007	0.003	0.005077
1	11	rs112780312	rs112780312	A	G	153797015	-5.736	9.72e-09	1	A	G	-0.0161012	0.00344032	2.86667e-06	A	G	-0.0134894	0.00681281	0.04776	A	G	-0.007	0.003	0.006138
1	11	rs112780312	rs4391701	T	C	153798128	-5.17	2.34e-07	0.853193	T	C	-0.0142851	0.00335229	2.0325e-05	T	C	-0.010871	0.00663272	0.1011	T	C	-0.008	0.003	0.00354
1	11	rs112780312	rs7512766	T	C	153810564	-5.216	1.83e-07	0.853193	T	C	-0.0148599	0.0031879	3.14145e-06	T	C	-0.0136602	0.00551704	0.0133	T	C	-0.008	0.003	0.002742
1	11	rs112780312	rs72694231	T	C	153816752	5.221	1.78e-07	0.853193	T	C	0.0143805	0.00335343	1.80047e-05	T	C	0.0111054	0.00663406	0.09404	T	C	0.008	0.003	0.00256
1	11	rs112780312	rs4612664	T	C	153822673	5.49	4.01e-08	0.869502	T	C	0.0145409	0.00326008	8.18418e-06	T	C	0.0117667	0.00600344	0.05002	T	C	0.007	0.003	0.005035
1	11	rs112780312	rs72694234	T	G	153823918	5.494	3.94e-08	0.869502	T	G	0.0150533	0.00334318	6.71025e-06	T	G	0.011469	0.00662184	0.0833	T	G	0.008	0.003	0.004818
1	11	rs112780312	rs4845576	T	C	153825404	-5.223	1.76e-07	0.853193	T	C	-0.0148302	0.0031927	3.40027e-06	T	C	-0.0134987	0.00551642	0.0144	T	C	-0.008	0.003	0.003314
1	11	rs112780312	rs12038577	T	C	153826169	5.481	4.23e-08	0.869502	T	C	0.015454	0.00317833	1.16022e-06	T	C	0.0139313	0.00550208	0.01133	T	C	0.008	0.003	0.004718
1	11	rs112780312	rs9660089	T	C	153827619	5.469	4.52e-08	0.864757	T	C	0.0154255	0.00317752	1.2064e-06	T	C	0.0139312	0.00550206	0.01135	T	C	0.008	0.003	0.00488
1	11	rs112780312	rs4595397	T	C	153828080	5.215	1.84e-07	0.843669	T	C	0.0149042	0.0031746	2.66813e-06	T	C	0.0132982	0.0055042	0.0157	T	C	0.008	0.003	0.003123
1	11	rs112780312	rs4520447	T	C	153829389	5.24	1.61e-07	0.853193	T	C	0.014835	0.00318198	3.12837e-06	T	C	0.0135608	0.00551476	0.01393	T	C	0.008	0.003	0.003447
1	11	rs112780312	rs4845577	A	T	153829633	NA	NA	0.842334	NA	NA	NA	NA	NA	NA	NA	NA	NA	NA	NA	NA	NA	NA	NA
1	11	rs112780312	rs4845578	A	G	153829993	-5.197	2.02e-07	0.853193	A	G	-0.0148214	0.00318198	3.19432e-06	A	G	-0.0135235	0.00551529	0.01422	A	G	-0.008	0.003	0.003463
1	11	rs112780312	rs4508047	T	C	153831157	5.197	2.03e-07	0.848417	T	C	0.0144029	0.00335271	1.7399e-05	T	C	0.0112795	0.00663891	0.08927	T	C	0.008	0.003	0.003435
1	11	rs112780312	rs6700451	T	C	153831246	5.176	2.26e-07	0.853193	T	C	0.0148057	0.00318802	3.41444e-06	T	C	0.0135356	0.00551574	0.01411	T	C	0.008	0.003	0.003425
1	11	rs112780312	rs11585416	A	T	153833104	5.152	2.58e-07	0.848417	A	T	0.0147715	0.00318065	3.41444e-06	A	T	0.0134223	0.00551675	0.01498	A	T	0.008	0.003	0.003509
1	11	rs112780312	rs11583152	A	G	153833153	-5.175	2.28e-07	0.848417	A	G	-0.0143329	0.00334496	1.82803e-05	A	G	-0.0109523	0.00663374	0.09876	A	G	-0.008	0.003	0.003455
1	11	rs112780312	rs7552274	T	C	153833591	-5.164	2.42e-07	0.848417	T	C	-0.0144175	0.00321374	7.25007e-06	T	C	-0.012126	0.00570633	0.03358	T	C	-0.008	0.003	0.003444
1	11	rs112780312	rs6694061	C	G	153834868	-5.174	2.3e-07	0.853193	C	G	-0.0143503	0.00335297	1.87012e-05	C	G	-0.0109406	0.0066347	0.09918	C	G	-0.008	0.003	0.002755
1	11	rs112780312	rs59308681	A	G	153836163	-5.082	3.74e-07	0.853193	A	G	-0.0143463	0.00335271	1.87723e-05	A	G	-0.0109736	0.00663458	0.09803	A	G	-0.008	0.003	0.001987
1	11	rs112780312	rs11587151	T	C	153837181	-5.172	2.32e-07	0.853193	T	C	-0.0148001	0.00318799	3.44296e-06	T	C	-0.0135572	0.00551555	0.01398	T	C	-0.008	0.003	0.002561
1	11	rs112780312	rs34805562	T	C	153839045	-5.175	2.28e-07	0.853193	T	C	-0.01435	0.00334632	1.80047e-05	T	C	-0.0110522	0.00663397	0.09576	T	C	-0.008	0.003	0.002721
1	11	rs112780312	rs12567313	T	C	153840505	5.168	2.37e-07	0.853193	T	C	0.0143126	0.00335343	1.97196e-05	T	C	0.0109013	0.00663501	0.1004	T	C	0.008	0.003	0.002449
1	11	rs112780312	rs112874207	T	C	153841721	5.175	2.28e-07	0.853193	T	C	0.0143066	0.00335268	1.97943e-05	T	C	0.0109209	0.00663479	0.09984	T	C	0.008	0.003	0.002766
1	11	rs112780312	rs12042989	A	G	153842288	5.192	2.08e-07	0.848417	A	G	0.0147701	0.00318152	3.44296e-06	A	G	0.0134437	0.00551422	0.01476	A	G	0.008	0.003	0.002822
1	11	rs112780312	rs201743577	T	C	153842445	NA	NA	0.842334	NA	NA	NA	NA	NA	NA	NA	NA	NA	NA	NA	NA	NA	NA	NA
1	11	rs112780312	rs12041850	C	G	153843036	5.2	1.99e-07	0.848417	C	G	0.0143227	0.00334588	1.86304e-05	C	G	0.0109861	0.0066341	0.0978	C	G	0.008	0.003	0.002812
1	11	rs112780312	rs59678326	T	C	153843243	5.186	2.15e-07	0.848417	T	C	0.014333	0.00334499	1.82803e-05	T	C	0.0110213	0.00663532	0.09677	T	C	0.008	0.003	0.00275
1	11	rs112780312	rs11590099	T	C	153848208	-5.177	2.25e-07	0.853193	T	C	-0.0147147	0.00319323	4.06364e-06	T	C	-0.0132107	0.00551597	0.01661	T	C	-0.008	0.003	0.002414
1	11	rs112780312	rs12041920	T	C	153851106	5.194	2.06e-07	0.853193	T	C	0.0147256	0.00318195	3.69475e-06	T	C	0.0132856	0.00551498	0.01599	T	C	0.008	0.003	0.002583
1	11	rs112780312	rs60150125	A	G	153854070	-5.17	2.34e-07	0.843366	A	G	-0.0142643	0.0033441	1.99446e-05	A	G	-0.011328	0.00663229	0.08757	A	G	-0.008	0.003	0.002886
1	11	rs112780312	rs12043350	T	C	153854380	-5.124	3e-07	0.853193	T	C	-0.0137582	0.00330561	3.15359e-05	T	C	-0.00960452	0.00626518	0.1253	T	C	-0.008	0.003	0.00266
1	11	rs112780312	rs12042562	C	G	153856364	-5.115	3.14e-07	0.853193	C	G	-0.0146643	0.00319479	4.43107e-06	C	G	-0.0138315	0.00551936	0.01222	C	G	-0.008	0.003	0.002058
1	11	rs112780312	rs12409811	T	C	153856873	-5.059	4.21e-07	0.853193	T	C	-0.0142165	0.00335414	2.25017e-05	T	C	-0.0117213	0.00663722	0.07745	T	C	-0.008	0.003	0.001865
1	11	rs112780312	rs7537691	T	C	153858720	-5.117	3.11e-07	0.848417	T	C	-0.0146591	0.00318295	4.11428e-06	T	C	-0.0138962	0.00551874	0.01182	T	C	-0.008	0.003	0.002806
1	11	rs112780312	rs11586830	A	G	153860305	-5.154	2.55e-07	0.853193	A	G	-0.0143275	0.00334502	1.84196e-05	A	G	-0.0113643	0.00663027	0.08646	A	G	-0.008	0.003	0.002883
1	11	rs112780312	rs11589043	A	T	153860453	5.175	2.28e-07	0.848417	A	T	0.0143079	0.00334505	1.89151e-05	A	T	0.011222	0.00663239	0.0907	A	T	0.008	0.003	0.002826
1	11	rs112780312	rs113489222	T	G	153863426	-4.754	2e-06	0.76802	T	G	-0.0131768	0.00339458	0.000103724	T	G	-0.0107551	0.00672194	0.1096	T	G	-0.007	0.003	0.005723
1	11	rs112780312	rs11264532	A	G	153865536	-5.111	3.21e-07	0.848417	A	G	-0.0146809	0.00318173	3.94779e-06	A	G	-0.0140218	0.00551604	0.01102	A	G	-0.008	0.003	0.002448
1	11	rs112780312	rs6427329	A	G	153867805	5.1	3.41e-07	0.848417	A	G	0.0141467	0.00334632	2.36271e-05	A	G	0.0117658	0.00663609	0.07615	A	G	0.008	0.003	0.002463
1	11	rs112780312	rs6659220	A	T	153868650	-4.999	5.77e-07	0.848417	A	T	-0.0139045	0.00334718	3.2657e-05	A	T	-0.0109441	0.00664487	0.0996	A	T	-0.008	0.003	0.003085
1	11	rs112780312	rs11591134	A	G	153868966	-5.056	4.27e-07	0.853193	A	G	-0.0141197	0.00335401	2.55591e-05	A	G	-0.0116809	0.00663686	0.07846	A	G	-0.008	0.003	0.002599
1	11	rs112780312	rs12401565	A	G	153869946	-5.08	3.77e-07	0.848417	A	G	-0.014626	0.00318168	4.28749e-06	A	G	-0.013969	0.00551697	0.01134	A	G	-0.008	0.003	0.002454
1	11	rs112780312	rs12022158	A	G	153870649	5.076	3.86e-07	0.848417	A	G	0.0140453	0.00326317	1.67601e-05	A	G	0.0117164	0.00601459	0.0514	A	G	0.008	0.003	0.002324
1	11	rs112780312	rs11589857	A	G	153871592	-5.046	4.5e-07	0.853193	A	G	-0.0141055	0.0032707	1.61271e-05	A	G	-0.0119205	0.00601438	0.04746	A	G	-0.008	0.003	0.002372
1	11	rs112780312	rs12022730	A	C	153872615	-5.05	4.43e-07	0.853193	A	C	-0.0140526	0.0032707	1.73499e-05	A	C	-0.0117477	0.00601521	0.05081	A	C	-0.008	0.003	0.002356
1	11	rs112780312	rs11264559	T	C	153874688	-5.044	4.57e-07	0.853193	T	C	-0.0141753	0.00335375	2.37159e-05	T	C	-0.0117586	0.00663576	0.07645	T	C	-0.008	0.003	0.002976
1	11	rs112780312	rs11264567	A	G	153875689	4.986	6.16e-07	0.848417	A	G	0.0141762	0.0033533	2.36271e-05	A	G	0.0118131	0.00663656	0.07512	A	G	0.008	0.003	0.00421
1	11	rs112780312	rs11577942	A	G	153877724	-5.019	5.19e-07	0.853193	A	G	-0.0141952	0.00335378	2.31012e-05	A	G	-0.0118867	0.0066369	0.07331	A	G	-0.008	0.003	0.002086
1	11	rs112780312	rs6671132	T	C	153879744	-4.983	6.25e-07	0.853193	T	C	-0.0141165	0.00335391	2.56547e-05	T	C	-0.011779	0.00663604	0.07588	T	C	-0.008	0.003	0.002011
1	11	rs112780312	rs12028398	T	C	153883283	-4.999	5.76e-07	0.853193	T	C	-0.0146734	0.00318901	4.20003e-06	T	C	-0.0141394	0.00551891	0.0104	T	C	-0.008	0.003	0.002113
1	11	rs112780312	rs4845583	T	C	153883881	-4.989	6.08e-07	0.848417	T	C	-0.0146541	0.00318898	4.32296e-06	T	C	-0.0140718	0.00551618	0.01074	T	C	-0.008	0.003	0.001819
1	11	rs112780312	rs12032914	A	G	153886762	4.962	6.99e-07	0.853193	A	G	0.0141709	0.00335473	2.39841e-05	A	G	0.0118573	0.00664275	0.0742	A	G	0.008	0.003	0.002117
1	11	rs112780312	rs12033835	T	C	153886873	4.955	7.22e-07	0.848417	T	C	0.0150579	0.00318876	2.33338e-06	T	C	0.0141834	0.00551667	0.01015	T	C	0.009	0.003	0.00148
1	11	rs112780312	rs11581644	A	G	153890988	4.948	7.5e-07	0.848145	A	G	0.014673	0.00319251	4.30519e-06	A	G	0.0138374	0.00552393	0.01225	A	G	0.008	0.003	0.002724
1	11	rs112780312	rs4845357	A	G	153896212	4.936	7.96e-07	0.821855	A	G	0.0145746	0.00319439	5.05281e-06	A	G	0.0138762	0.00551956	0.01194	A	G	0.008	0.003	0.002077
1	11	rs112780312	rs4845585	T	C	153896370	4.947	7.53e-07	0.817242	T	C	0.0141225	0.00335333	2.53688e-05	T	C	0.0118123	0.00663613	0.07505	T	C	0.008	0.003	0.002368
1	11	rs112780312	rs4845358	T	C	153896425	-4.951	7.39e-07	0.821855	T	C	-0.0141614	0.00335382	2.41645e-05	T	C	-0.0119671	0.00663735	0.07147	T	C	-0.008	0.003	0.002041
1	11	rs112780312	rs10796968	A	C	153899330	4.935	8.02e-07	0.821855	A	C	0.0141003	0.00335411	2.62358e-05	A	C	0.0119113	0.00663953	0.07277	A	C	0.008	0.003	0.002937
1	11	rs112780312	rs12406003	A	C	153900490	-4.937	7.94e-07	0.821855	A	C	-0.0145522	0.00335404	1.43321e-05	A	C	-0.0119733	0.00664076	0.07133	A	C	-0.009	0.003	0.001516
1	11	rs112780312	rs3748849	A	G	153901149	4.971	6.66e-07	0.821855	A	G	0.0140436	0.00335408	2.82645e-05	A	G	0.0116005	0.00663642	0.08042	A	G	0.008	0.003	0.00224
1	11	rs112780312	rs3748848	A	G	153901302	4.958	7.12e-07	0.821855	A	G	0.0145654	0.00318936	4.95043e-06	A	G	0.0140464	0.00551703	0.01089	A	G	0.008	0.003	0.002039
1	11	rs112780312	rs1572788	T	C	153903883	4.984	6.22e-07	0.821855	T	C	0.0146177	0.00318941	4.57925e-06	T	C	0.0141	0.00551643	0.01058	T	C	0.008	0.003	0.00205
1	11	rs112780312	rs11586593	T	C	153904214	5.019	5.19e-07	0.817242	T	C	0.0140901	0.00335369	2.6531e-05	T	C	0.0116864	0.0066362	0.07828	T	C	0.008	0.003	0.003144
1	11	rs112780312	rs11264619	A	G	153904338	-4.979	6.39e-07	0.821855	A	G	-0.0140836	0.00335417	2.68294e-05	A	G	-0.0116341	0.00663671	0.07964	A	G	-0.008	0.003	0.002167
1	11	rs112780312	rs11264620	T	C	153904574	5.004	5.62e-07	0.817242	T	C	0.0141104	0.00334642	2.4806e-05	T	C	0.0117317	0.0066356	0.07702	T	C	0.008	0.003	0.002164
1	11	rs112780312	rs58095661	T	C	153907839	4.981	6.31e-07	0.821855	T	C	0.0140954	0.00335495	2.6531e-05	T	C	0.0116931	0.00663629	0.07804	T	C	0.008	0.003	0.002037
1	11	rs112780312	rs61219911	T	C	153907908	4.981	6.32e-07	0.817242	T	C	0.0140816	0.00335369	2.68294e-05	T	C	0.0116931	0.00663629	0.07806	T	C	0.008	0.003	0.001914
1	11	rs112780312	rs11586075	A	G	153908309	-5.002	5.67e-07	0.817242	A	G	-0.0141004	0.00334674	2.51799e-05	A	G	-0.0117452	0.00663569	0.07677	A	G	-0.008	0.003	0.001963
1	11	rs112780312	rs1043608	C	G	153909069	-4.958	7.14e-07	0.821855	C	G	-0.0140805	0.00335411	2.69296e-05	C	G	-0.0117787	0.00663591	0.07583	C	G	-0.008	0.003	0.002178
1	11	rs112780312	rs1110165	T	G	153913699	5.002	5.67e-07	0.817242	T	G	0.0146664	0.00318869	4.23479e-06	T	G	0.014221	0.0055163	0.009926	T	G	0.008	0.003	0.001899
1	11	rs112780312	rs6680140	T	C	153917369	-5.035	4.77e-07	0.821855	T	C	-0.014797	0.00318969	3.50068e-06	T	C	-0.0143829	0.00551703	0.009126	T	C	-0.008	0.003	0.001814
1	11	rs112780312	rs946682	T	G	153919756	5.077	3.83e-07	0.821855	T	G	0.0148525	0.00318924	3.20766e-06	T	G	0.0143995	0.00551707	0.009048	T	G	0.008	0.003	0.00184
1	11	rs112780312	rs8450	A	G	153920286	-5.03	4.9e-07	0.821855	A	G	-0.013396	0.00333146	5.79332e-05	A	G	-0.00863846	0.00645143	0.1804	A	G	-0.008	0.003	0.001922
1	11	rs112780312	rs10559	A	G	153920564	5.036	4.76e-07	0.816914	A	G	0.0134002	0.00333042	5.73183e-05	A	G	0.00872737	0.00644562	0.1756	A	G	0.008	0.003	0.001825
1	11	rs112780312	rs10127983	T	C	153923276	-5.024	5.05e-07	0.792875	T	C	-0.0146075	0.00318899	4.63603e-06	T	C	-0.0145165	0.00552169	0.008562	T	C	-0.008	0.003	0.002865
1	11	rs112780312	rs11264680	T	C	153926078	5.149	2.63e-07	0.821855	T	C	0.0150088	0.00318753	2.49444e-06	T	C	0.0142043	0.0055141	0.009992	T	C	0.008	0.003	0.001792
1	11	rs112780312	rs10908557	C	G	153927052	5.141	2.73e-07	0.808994	C	G	0.0149	0.00318359	2.86536e-06	C	G	0.0144126	0.0055242	0.009087	C	G	0.008	0.003	0.001864
1	11	rs112780312	rs10908558	T	C	153927270	5.135	2.81e-07	0.816914	T	C	0.0149696	0.0031897	2.69064e-06	T	C	0.0143929	0.00551662	0.009071	T	C	0.008	0.003	0.001662
1	11	rs112780312	rs6724	C	G	153932212	-4.825	1.4e-06	0.775893	C	G	-0.0132006	0.00338234	9.50815e-05	C	G	-0.0102252	0.00670946	0.1275	C	G	-0.007	0.003	0.007478
1	11	rs112780312	rs3791187	T	C	153934203	5.102	3.37e-07	0.816914	T	C	0.0142568	0.00335362	2.12664e-05	T	C	0.0117695	0.00663446	0.07608	T	C	0.008	0.003	0.001804
1	11	rs112780312	rs11264734	T	C	153937746	4.804	1.55e-06	0.775893	T	C	0.0130365	0.00339536	0.00012328	T	C	0.00950909	0.00671546	0.1567	T	C	0.007	0.003	0.007228
1	11	rs112780312	rs12027783	T	C	153937864	-4.791	1.66e-06	0.775893	T	C	-0.0129963	0.00339533	0.000129349	T	C	-0.00934645	0.00671923	0.1641	T	C	-0.007	0.003	0.006881
1	11	rs112780312	rs11264743	T	C	153941514	-4.663	3.12e-06	0.771252	T	C	-0.0130661	0.00322414	5.0653e-05	T	C	-0.0115574	0.00557789	0.0383	T	C	-0.007	0.003	0.007297
1	11	rs112780312	rs12023699	A	G	153942156	-4.67	3.01e-06	0.771252	A	G	-0.0125783	0.00338926	0.000206262	A	G	-0.00876404	0.0067106	0.1917	A	G	-0.007	0.003	0.007631
1	11	rs112780312	rs12403956	A	G	153943079	4.669	3.03e-06	0.766637	A	G	0.0131203	0.00321434	4.46896e-05	A	G	0.0118535	0.00557812	0.03362	A	G	0.007	0.003	0.008048
1	11	rs112780312	rs6666703	T	C	153943800	-4.629	3.68e-06	0.771252	T	C	-0.0124933	0.00339025	0.000228652	T	C	-0.0086137	0.00673472	0.2007	T	C	-0.007	0.003	0.0061
1	11	rs112780312	rs11264763	T	C	153948705	-4.575	4.75e-06	0.734374	T	C	-0.0120622	0.00338252	0.000362401	T	C	-0.00878898	0.00669892	0.1895	T	C	-0.007	0.003	0.008846
1	11	rs112780312	rs1547766	C	A	153952205	NA	NA	0.720057	A	C	0.0117264	0.00485258	0.0156694	A	C	0.00993103	0.00665173	0.1354	A	C	0.007	0.003	0.01558
1	11	rs112780312	rs1547767	C	T	153952220	NA	NA	0.720057	T	C	0.0117264	0.00485258	0.0156694	T	C	0.00993103	0.00665173	0.1354	T	C	0.007	0.003	0.01452
1	11	rs112780312	rs7524739	T	G	153952598	4.832	1.35e-06	0.715724	T	G	0.0123459	0.00336181	0.000240287	T	G	0.0100058	0.00665277	0.1325	T	G	0.007	0.003	0.01599
1	11	rs112780312	rs138767862	A	G	153953037	NA	NA	0.720057	A	G	-0.0117067	0.00485228	0.0158386	A	G	-0.0098905	0.00665131	0.137	A	G	-0.007	0.003	0.01169
1	11	rs112780312	rs12564669	C	G	153966081	-4.878	1.07e-06	0.702867	C	G	-0.0132574	0.00319022	3.24362e-05	C	G	-0.0129555	0.005513	0.01875	C	G	-0.007	0.003	0.01362
1	11	rs112780312	rs6701341	T	C	153974621	-4.831	1.36e-06	0.702867	T	C	-0.0127239	0.00326827	9.89475e-05	T	C	-0.0109772	0.00601161	0.0678	T	C	-0.007	0.003	0.01261
1	11	rs112780312	rs6703545	T	C	153980341	-4.758	1.96e-06	0.702867	T	C	-0.012265	0.00335191	0.000253083	T	C	-0.0105713	0.00663196	0.111	T	C	-0.006	0.003	0.01884
1	11	rs112780312	rs61542760	A	G	153981639	-4.75	2.04e-06	0.702867	A	G	-0.012285	0.00335427	0.00024977	A	G	-0.0105846	0.00663197	0.1105	A	G	-0.006	0.003	0.0197
1	11	rs112780312	rs12408260	T	C	153982925	-4.781	1.74e-06	0.702867	T	C	-0.0122808	0.00335004	0.000246497	T	C	-0.0107202	0.0066297	0.1058	T	C	-0.006	0.003	0.01982
1	11	rs112780312	rs6672856	T	C	153986119	-4.733	2.21e-06	0.696546	T	C	-0.0122556	0.00326707	0.000175963	T	C	-0.0109585	0.00601127	0.06827	T	C	-0.006	0.003	0.0298
1	11	rs112780312	rs11264865	C	G	153986637	4.736	2.18e-06	0.696546	C	G	0.0121989	0.00335162	0.000272948	C	G	0.010478	0.00663167	0.1142	C	G	0.006	0.003	0.02222
1	11	rs112780312	rs11264866	A	G	153987050	-4.75	2.04e-06	0.696546	A	G	-0.0122406	0.0033522	0.000260689	A	G	-0.0106614	0.00663437	0.108	A	G	-0.006	0.003	0.02738
1	11	rs112780312	rs10796986	A	G	153987412	-4.712	2.46e-06	0.696546	A	G	-0.0121908	0.00335171	0.000275644	A	G	-0.0105136	0.00663321	0.113	A	G	-0.006	0.003	0.02952
1	11	rs112780312	rs6679907	A	C	153988152	-4.714	2.42e-06	0.696546	A	C	-0.0121989	0.00335162	0.000272948	A	C	-0.0106331	0.00663327	0.109	A	C	-0.006	0.003	0.02715
1	11	rs112780312	rs113165037	A	G	153989736	4.756	1.98e-06	0.696546	A	G	0.0121021	0.00335065	0.000304014	A	G	0.0103354	0.00663802	0.1195	A	G	0.006	0.003	0.03422
1	11	rs112780312	rs11264871	A	C	153990890	4.658	3.2e-06	0.641854	A	C	0.0117105	0.00327076	0.000343116	A	C	0.0109222	0.00601111	0.06926	A	C	0.005	0.003	0.04277
1	11	rs112780312	rs11264873	T	C	153990946	-4.626	3.73e-06	0.667446	T	C	-0.0119113	0.00327647	0.000277528	T	C	-0.0112961	0.00601496	0.0604	T	C	-0.006	0.003	0.03604
1	11	rs112780312	rs12048137	T	G	153992734	4.173	3e-05	0.610262	T	G	0.011963	0.00323872	0.000220967	T	G	0.0134918	0.00560757	0.01611	T	G	0.006	0.003	0.02039
1	11	rs112780312	rs12049128	A	G	153994210	4.221	2.43e-05	0.610262	A	G	0.0112164	0.00340807	0.000997858	A	G	0.0104633	0.00674616	0.1209	A	G	0.006	0.003	0.02088
1	11	rs112780312	rs11264875	T	C	153994647	-4.262	2.02e-05	0.610262	T	C	-0.0122155	0.00324077	0.000163685	T	C	-0.0137745	0.00560851	0.01405	T	C	-0.006	0.003	0.02194
1	11	rs112780312	rs11264886	A	G	153997346	-4.226	2.38e-05	0.610262	A	G	-0.012114	0.00323892	0.000183924	A	G	-0.0134704	0.00561035	0.01637	A	G	-0.006	0.003	0.02249
1	11	rs112780312	rs7552737	A	G	153997804	4.25	2.14e-05	0.603822	A	G	0.0113598	0.00341053	0.000865972	A	G	0.0106712	0.00674967	0.1139	A	G	0.006	0.003	0.02427
1	11	rs112780312	rs113792102	A	G	153999035	4.141	3.46e-05	0.603822	A	G	0.0112094	0.00340595	0.000997858	A	G	0.010519	0.00674727	0.119	A	G	0.006	0.003	0.02443
1	11	rs112780312	rs11264895	A	G	153999301	4.163	3.15e-05	0.603822	A	G	0.0112064	0.00340591	0.00100086	A	G	0.0105384	0.00674671	0.1183	A	G	0.006	0.003	0.02346
1	11	rs112780312	rs12049557	T	C	154001689	-4.193	2.75e-05	0.603822	T	C	-0.0112752	0.0034102	0.000945293	T	C	-0.0105252	0.00674689	0.1187	T	C	-0.006	0.003	0.02051
1	11	rs112780312	rs56287424	A	G	154008445	-4.148	3.35e-05	0.603822	A	G	-0.0112951	0.00341098	0.000928349	A	G	-0.0106069	0.00674742	0.1161	A	G	-0.006	0.003	0.02872
1	11	rs112780312	rs7521303	T	C	154011605	4.233	2.3e-05	0.603822	T	C	0.0122432	0.00324293	0.000159787	T	C	0.0137715	0.00560958	0.0141	T	C	0.006	0.003	0.02164
1	11	rs112780312	rs10908627	T	C	154012001	-4.231	2.32e-05	0.603822	T	C	-0.0107959	0.00338689	0.00143477	T	C	-0.00846934	0.00656029	0.1967	T	C	-0.006	0.003	0.02118
1	11	rs112780312	rs7526558	T	C	154015428	-4.201	2.66e-05	0.603822	T	C	-0.0116393	0.00340664	0.000633944	T	C	-0.0102371	0.00673054	0.1283	T	C	-0.007	0.003	0.01095
1	11	rs112780312	rs6670019	T	G	154017992	-4.255	2.09e-05	0.603822	T	G	-0.0113069	0.00341629	0.000933966	T	G	-0.0105064	0.00674783	0.1194	T	G	-0.006	0.003	0.01995
1	11	rs112780312	rs7531051	A	G	154020017	-4.235	2.29e-05	0.603822	A	G	-0.0112852	0.00340972	0.000933966	A	G	-0.0105113	0.00674664	0.1192	A	G	-0.006	0.003	0.02154
1	11	rs112780312	rs58289586	T	C	154025666	4.224	2.4e-05	0.603822	T	C	0.0112665	0.00341017	0.000953872	T	C	0.0104245	0.00674726	0.1223	T	C	0.006	0.003	0.02261
1	11	rs112780312	rs11264964	C	G	154029450	-4.306	1.66e-05	0.603822	C	G	-0.01131	0.00340939	0.000908938	C	G	-0.0100154	0.00674435	0.1375	C	G	-0.006	0.003	0.02671
1	11	rs112780312	rs7547663	A	T	154030239	-4.271	1.95e-05	0.603822	A	T	-0.011003	0.00332579	0.000938296	A	T	-0.00936388	0.00611619	0.1258	A	T	-0.006	0.003	0.02508
1	12	rs7365380	rs7365380	T	C	173625710	5.475	4.39e-08	1	T	C	0.0078819	0.00292081	0.00696467	T	C	0.00448993	0.00505622	0.3747	T	C	0.005	0.003	0.03045
1	12	rs7365380	rs6660825	A	G	173724418	-5.475	4.39e-08	0.771685	A	G	-0.0093143	0.00307198	0.00242925	A	G	-0.00839449	0.00608296	0.1676	A	G	-0.006	0.003	0.02199
1	12	rs7365380	rs2208849	A	G	173831882	-5.387	7.17e-08	0.716916	A	G	-0.010594	0.0030679	0.000554018	A	G	-0.00998559	0.00608878	0.101	A	G	-0.006	0.003	0.01876
1	13	rs527825	rs2050701	A	G	183281919	3.531	0.0004133	0.622752	A	G	0.00797897	0.00324726	0.0140049	A	G	0.00945168	0.00596321	0.1129	A	G	0.002	0.003	0.5125
1	13	rs527825	rs2050700	T	C	183282196	-3.52	0.0004309	0.622752	T	C	-0.00821915	0.0033299	0.0135762	T	C	-0.0108972	0.00658043	0.09774	T	C	-0.002	0.003	0.5233
1	13	rs10911301	rs10911301	A	G	183282575	-5.509	3.62e-08	1	A	G	-0.0115451	0.00299965	0.000118692	A	G	-0.0166736	0.00552107	0.002531	A	G	-0.001	0.002	0.6753
1	13	rs527825	rs551452	T	C	183283098	-3.539	0.0004021	0.622752	T	C	-0.00803479	0.00324747	0.0133546	T	C	-0.00962233	0.00596179	0.1065	T	C	-0.002	0.003	0.4993
1	13	rs527825	rs636315	A	G	183283950	-3.543	0.0003962	0.622752	A	G	-0.00829346	0.00333153	0.0127964	A	G	-0.0112627	0.00657866	0.08681	A	G	-0.002	0.003	0.4952
1	13	rs10911301	rs10911302	A	G	183283969	5.452	4.98e-08	0.98863	A	G	0.0118463	0.00307624	0.000117688	A	G	0.019238	0.00608991	0.001583	A	G	0.001	0.002	0.6461
1	13	rs527825	rs2788066	G	T	183286579	NA	NA	0.631038	T	G	0.00727454	0.00480159	0.129766	T	G	0.0111298	0.00658179	0.09078	T	G	0.002	0.003	0.4782
1	13	rs10911301	rs10911304	T	G	183286581	5.214	1.85e-07	0.910935	T	G	0.0123917	0.00307012	5.43161e-05	T	G	0.0173941	0.00608612	0.004261	T	G	0.002	0.002	0.3732
1	13	rs10911301	rs10911305	A	G	183286777	5.26	1.44e-07	0.914569	A	G	0.0112115	0.00299379	0.00018046	A	G	0.0142823	0.00551442	0.00959	A	G	0.001	0.002	0.5576
1	13	rs10911301	rs10911306	T	C	183287679	5.311	1.09e-07	0.943255	T	C	0.0115051	0.00307527	0.000183165	T	C	0.0189007	0.00608914	0.001909	T	C	0.001	0.002	0.6196
1	13	rs527825	rs1411392	T	C	183290050	3.484	0.0004933	0.631038	T	C	0.00830487	0.00333498	0.0127661	T	C	0.0111339	0.0065881	0.09096	T	C	0.002	0.003	0.5361
1	13	rs10911301	rs1411393	A	G	183290145	5.188	2.12e-07	0.918588	A	G	0.0111348	0.00299372	0.000199722	A	G	0.014244	0.00551452	0.009793	A	G	0.001	0.002	0.5782
1	13	rs527825	rs1411394	T	G	183290194	-3.479	0.0005036	0.631038	T	G	-0.00804293	0.003253	0.0134184	T	G	-0.00975021	0.00597439	0.1027	T	G	-0.002	0.003	0.519
1	13	rs527825	rs2480768	A	G	183290647	-3.505	0.0004559	0.631038	A	G	-0.00782605	0.00333573	0.0189695	A	G	-0.0110114	0.00658973	0.09466	A	G	-0.001	0.003	0.6696
1	13	rs527825	rs1338371	T	C	183293267	-3.505	0.000457	0.631038	T	C	-0.00831455	0.00333322	0.0126153	T	C	-0.0112261	0.0065881	0.08831	T	C	-0.002	0.003	0.532
1	13	rs10911301	rs10911309	A	G	183293707	-5.243	1.58e-07	0.914569	A	G	-0.0115177	0.00306964	0.000175329	A	G	-0.0164433	0.00608335	0.006873	A	G	-0.001	0.002	0.568
1	13	rs527825	rs687392	T	C	183294416	-3.488	0.0004859	0.622115	T	C	-0.00816522	0.00333313	0.0142969	T	C	-0.0105495	0.00658111	0.1089	T	C	-0.002	0.003	0.5525
1	13	rs10911301	rs4651152	C	G	183294430	-5.238	1.62e-07	0.903894	C	G	-0.0114142	0.00306966	0.000200503	C	G	-0.0158792	0.00608397	0.009056	C	G	-0.001	0.002	0.5772
1	13	rs10911301	rs4549998	A	G	183295930	-5.24	1.61e-07	0.914569	A	G	-0.0110401	0.00299363	0.00022615	A	G	-0.0137256	0.00551449	0.01282	A	G	-0.001	0.002	0.5817
1	13	rs10911301	rs4630090	T	C	183296270	5.248	1.54e-07	0.914569	T	C	0.0114219	0.00306965	0.000198503	T	C	0.0159744	0.00608317	0.008628	T	C	0.001	0.002	0.5703
1	13	rs10911301	rs12033696	T	C	183297422	5.239	1.62e-07	0.914569	T	C	0.0111089	0.00299364	0.000206563	T	C	0.0139458	0.00551435	0.01144	T	C	0.001	0.002	0.5729
1	13	rs10911301	rs12750586	A	G	183297476	5.226	1.73e-07	0.914569	A	G	0.0114504	0.00306964	0.000191329	A	G	0.0161084	0.00608324	0.008106	A	G	0.001	0.002	0.5676
1	13	rs10911301	rs12122499	A	C	183297613	-5.224	1.75e-07	0.914569	A	C	-0.0114919	0.00306965	0.000181328	A	C	-0.0162308	0.0060835	0.007625	A	C	-0.001	0.002	0.5648
1	13	rs10911301	rs12122568	A	C	183297826	-5.228	1.72e-07	0.914569	A	C	-0.00992124	0.00291887	0.000676328	A	C	-0.00962968	0.0050576	0.05691	A	C	-0.001	0.002	0.5531
1	13	rs10911301	rs12130162	T	C	183297930	5.191	2.09e-07	0.914569	T	C	0.0113882	0.00306966	0.000207306	T	C	0.0158223	0.00608316	0.009304	T	C	0.001	0.002	0.6313
1	13	rs527825	rs543423	A	G	183297931	-3.419	0.0006292	0.631038	A	G	-0.00698413	0.00316943	0.0275531	A	G	-0.00735358	0.00547956	0.1794	A	G	-0.001	0.003	0.5943
1	13	rs10911301	rs12130199	T	C	183298008	5.226	1.74e-07	0.914569	T	C	0.00992375	0.00291887	0.000674207	T	C	0.00963977	0.00505759	0.05663	T	C	0.001	0.002	0.5636
1	13	rs10911301	rs12145095	A	G	183298049	5.225	1.74e-07	0.914569	A	G	0.00993378	0.00291887	0.000665786	A	G	0.00967053	0.00505781	0.05582	A	G	0.001	0.002	0.5597
1	13	rs527825	rs616545	A	G	183298150	3.473	0.0005154	0.631038	A	G	0.00741367	0.00316941	0.0193285	A	G	0.00743628	0.00547591	0.1745	A	G	0.002	0.003	0.5274
1	13	rs10911301	rs10911310	C	G	183298219	5.209	1.9e-07	0.914569	C	G	0.0114634	0.00306965	0.000188149	C	G	0.0160969	0.00608347	0.008141	C	G	0.001	0.002	0.5658
1	13	rs10911301	rs10911311	T	C	183298342	5.209	1.9e-07	0.914569	T	C	0.0099438	0.00291887	0.000657463	T	C	0.00969508	0.00505742	0.05522	T	C	0.001	0.002	0.5662
1	13	rs10911301	rs10797873	C	G	183298463	5.204	1.95e-07	0.914569	C	G	0.0114038	0.00306965	0.000203199	C	G	0.0158483	0.00608378	0.009191	C	G	0.001	0.002	0.5977
1	13	rs10911301	rs10797874	T	C	183298495	-5.207	1.92e-07	0.914569	T	C	-0.0114038	0.00306965	0.000203199	T	C	-0.0158508	0.00608478	0.009176	T	C	-0.001	0.002	0.5679
1	13	rs10911301	rs10797875	T	C	183298502	-5.199	2e-07	0.914569	T	C	-0.00986358	0.00291887	0.000726847	T	C	-0.00943953	0.0050587	0.0621	T	C	-0.001	0.002	0.5773
1	13	rs10911301	rs4651153	T	C	183298610	-5.212	1.87e-07	0.914569	T	C	-0.0115617	0.00306963	0.000165558	T	C	-0.0163768	0.0060835	0.007095	T	C	-0.001	0.002	0.5561
1	13	rs10911301	rs10911312	A	G	183299013	-5.246	1.56e-07	0.914569	A	G	-0.0114452	0.00306965	0.000192615	A	G	-0.0160243	0.00608364	0.008439	A	G	-0.001	0.002	0.5635
1	13	rs10911301	rs10911313	A	G	183299153	5.212	1.87e-07	0.914569	A	G	0.0114839	0.00306959	0.000183165	A	G	0.0161213	0.00608351	0.008055	A	G	0.001	0.002	0.5506
1	13	rs10911301	rs1330224	A	G	183299502	5.202	1.98e-07	0.914569	A	G	0.00994377	0.00291886	0.000657459	A	G	0.00969528	0.00505753	0.05524	A	G	0.001	0.002	0.5449
1	13	rs10911301	rs953273	A	G	183299611	-5.197	2.03e-07	0.914569	A	G	-0.0120841	0.00306966	8.26304e-05	A	G	-0.0161101	0.00608386	0.008096	A	G	-0.002	0.002	0.5346
1	13	rs527825	rs485677	T	C	183299623	-3.45	0.0005596	0.631038	T	C	-0.00813179	0.00333557	0.0147729	T	C	-0.0104656	0.00658215	0.1119	T	C	-0.002	0.003	0.5111
1	13	rs10911301	rs953274	T	C	183299881	-5.195	2.05e-07	0.914569	T	C	-0.0099413	0.00291887	0.000659535	T	C	-0.0096852	0.00505755	0.05549	T	C	-0.001	0.002	0.5587
1	13	rs10911301	rs952448	T	C	183300112	-5.197	2.02e-07	0.914569	NA	NA	NA	NA	NA	T	C	-0.00951352	0.0050577	0.05995	NA	NA	NA	NA	NA
1	13	rs10911301	rs952446	A	G	183300311	NA	NA	0.914569	A	G	-0.0090163	0.00443824	0.0422041	A	G	-0.0160665	0.0060835	0.008271	A	G	-0.001	0.002	0.5534
1	13	rs10911301	rs2020986	A	G	183300515	5.196	2.04e-07	0.914569	A	G	0.0114738	0.00306967	0.000185641	A	G	0.0160543	0.0060835	0.008324	A	G	0.001	0.002	0.5534
1	13	rs527825	rs548208	A	C	183303352	-2.997	0.00273	0.629836	A	C	-0.00798407	0.00381457	0.0363449	NA	NA	NA	NA	NA	A	C	-0.003	0.003	0.3602
1	13	rs527825	rs546435	A	C	183303537	3.424	0.0006169	0.631038	A	C	0.00748299	0.0031711	0.0182874	A	C	0.00751161	0.00547892	0.1704	A	C	0.002	0.003	0.5312
1	13	rs527825	rs584954	T	C	183303730	3.407	0.0006557	0.620134	T	C	0.00816679	0.00333492	0.0143304	T	C	0.0104664	0.00659093	0.1123	T	C	0.002	0.003	0.5214
1	13	rs527825	rs595617	T	C	183303776	-3.369	0.0007557	0.620134	T	C	-0.0081865	0.00333492	0.0140971	T	C	-0.0105529	0.00659145	0.1094	T	C	-0.002	0.003	0.5201
1	13	rs527825	rs595697	G	A	183303828	NA	NA	0.631038	A	G	0.00698625	0.00480792	0.146203	A	G	0.0105184	0.00659048	0.1105	A	G	0.002	0.003	0.3569
1	13	rs527825	rs543694	G	A	183303837	NA	NA	0.631038	A	G	0.00698322	0.00480799	0.146385	A	G	0.010512	0.00659057	0.1107	A	G	0.002	0.003	0.4604
1	13	rs527825	rs596670	T	C	183304016	3.425	0.0006148	0.631038	T	C	0.00748293	0.00317107	0.0182874	T	C	0.00747886	0.00547902	0.1722	T	C	0.002	0.003	0.5341
1	13	rs527825	rs597546	T	C	183304193	3.423	0.0006196	0.631038	T	C	0.00815835	0.00333492	0.0144315	T	C	0.0103997	0.00659045	0.1146	T	C	0.002	0.003	0.5371
1	13	rs527825	rs518900	C	G	183304250	3.426	0.0006131	0.631038	C	G	0.00745563	0.00317105	0.0187151	C	G	0.00734611	0.00547808	0.1799	C	G	0.002	0.003	0.5199
1	13	rs527825	rs516210	T	G	183304528	-3.425	0.0006153	0.631038	T	G	-0.00815842	0.00333495	0.0144315	T	G	-0.0103994	0.00659027	0.1146	T	G	-0.002	0.003	0.5418
1	13	rs527825	rs2811553	T	C	183305435	-3.417	0.0006337	0.631038	T	C	-0.00747469	0.00317105	0.0184148	T	C	-0.00751234	0.00547946	0.1704	T	C	-0.002	0.003	0.5277
1	13	rs527825	rs2788051	A	G	183305464	3.418	0.0006309	0.631038	A	G	0.00747197	0.00317105	0.0184574	A	G	0.00750138	0.00547946	0.171	A	G	0.002	0.003	0.5283
1	13	rs527825	rs644681	T	G	183306465	3.39	0.0006989	0.629026	T	G	0.0072686	0.00317143	0.0219114	T	G	0.00698766	0.00547622	0.2018	T	G	0.002	0.003	0.5311
1	13	rs527825	rs644711	A	C	183306485	3.395	0.0006875	0.627031	A	C	0.00793939	0.00333517	0.0172888	A	C	0.00985608	0.00658829	0.1348	A	C	0.002	0.003	0.5473
1	13	rs527825	rs530396	T	C	183306668	2.538	0.01114	0.631038	T	C	0.00809627	0.00333486	0.0151919	T	C	0.0103024	0.00659142	0.1181	T	C	0.002	0.003	0.521
1	13	rs527825	rs658205	T	C	183307147	-3.388	0.0007047	0.631038	T	C	-0.00806212	0.00333703	0.015694	T	C	-0.0101641	0.00659148	0.1232	T	C	-0.002	0.003	0.5057
1	13	rs527825	rs692998	T	A	183307343	NA	NA	0.631038	NA	NA	NA	NA	NA	A	T	0.01025	0.00660011	0.1203	NA	NA	NA	NA	NA
1	13	rs527825	rs4992781	A	G	183307518	NA	NA	0.631038	NA	NA	NA	NA	NA	A	G	-0.0102824	0.00659126	0.1187	NA	NA	NA	NA	NA
1	13	rs527825	rs2811554	A	C	183307874	-3.409	0.0006532	0.634156	A	C	-0.00814992	0.00333378	0.0144992	A	C	-0.0104003	0.00659082	0.1146	A	C	-0.002	0.003	0.4952
1	13	rs527825	rs2788053	A	G	183307942	-3.407	0.0006557	0.634156	A	G	-0.0073437	0.00317093	0.0205612	A	G	-0.00699741	0.00547957	0.2015	A	G	-0.002	0.003	0.4999
1	13	rs527825	rs2485928	A	G	183308479	3.386	0.0007079	0.634156	A	G	0.0082338	0.00333242	0.0134805	A	G	0.0106757	0.00659806	0.1057	A	G	0.002	0.003	0.3933
1	13	rs527825	rs2492290	A	T	183308513	-3.428	0.0006091	0.634156	A	T	-0.00821684	0.00333353	0.0137048	A	T	-0.0107088	0.00659816	0.1047	A	T	-0.002	0.003	0.4962
1	13	rs527825	rs2485929	A	G	183308548	3.395	0.0006865	0.634156	A	G	0.00817481	0.00333245	0.0141634	A	G	0.0104528	0.00659481	0.1131	A	G	0.002	0.003	0.5054
1	13	rs527825	rs2485930	A	G	183308787	-3.391	0.0006962	0.634156	A	G	-0.00815746	0.00333341	0.0143977	A	G	-0.0104164	0.00658851	0.1139	A	G	-0.002	0.003	0.4954
1	13	rs527825	rs1536985	T	C	183308942	3.38	0.0007253	0.634156	T	C	0.00739038	0.00316876	0.0196868	T	C	0.00727054	0.00547893	0.1846	T	C	0.002	0.003	0.5463
1	13	rs527825	rs2023245	A	C	183309023	3.379	0.0007276	0.634156	A	C	0.0081884	0.00333341	0.014031	A	C	0.0106744	0.00659321	0.1055	A	C	0.002	0.003	0.5106
1	13	rs527825	rs1536984	A	T	183309101	-3.398	0.0006786	0.634156	A	T	-0.007319	0.00316966	0.0209394	A	T	-0.00700091	0.00547802	0.2011	A	T	-0.002	0.003	0.5026
1	13	rs527825	rs1541170	T	C	183309818	-3.367	0.0007607	0.634156	T	C	-0.00730077	0.00316884	0.021227	T	C	-0.00697454	0.00547882	0.2031	T	C	-0.002	0.003	0.519
1	13	rs527825	rs567842	T	C	183310136	3.353	0.0007981	0.634156	T	C	0.00731132	0.0031687	0.0210348	T	C	0.00714293	0.0054777	0.1923	T	C	0.002	0.003	0.527
1	13	rs527825	rs595164	C	G	183310176	-3.361	0.0007772	0.634156	C	G	-0.00805904	0.00333227	0.0155852	C	G	-0.0101358	0.00658595	0.1238	C	G	-0.002	0.003	0.5077
1	13	rs527825	rs595684	T	C	183310300	3.342	0.0008317	0.634156	T	C	0.00709604	0.00316978	0.0251785	T	C	0.00647133	0.00546565	0.2363	T	C	0.002	0.003	0.5208
1	13	rs527825	rs595742	A	G	183310326	3.353	0.0008001	0.632137	A	G	0.00820924	0.00333273	0.0137695	A	G	0.0108164	0.00658335	0.1005	A	G	0.002	0.003	0.4872
1	13	rs527825	rs565959	A	C	183310334	3.328	0.0008741	0.632137	A	C	0.00814894	0.00333337	0.0144992	A	C	0.0108099	0.00658335	0.1005	A	C	0.002	0.003	0.4789
1	13	rs527825	rs68149405	G	A	183310823	NA	NA	0.625781	NA	NA	NA	NA	NA	A	G	0.0104307	0.00655197	0.1113	NA	NA	NA	NA	NA
1	13	rs527825	rs2811556	C	A	183310883	NA	NA	0.636192	NA	NA	NA	NA	NA	A	C	0.0103631	0.00658392	0.1156	NA	NA	NA	NA	NA
1	13	rs527825	rs537630	A	G	183310981	-3.341	0.0008362	0.634156	A	G	-0.00811893	0.0033326	0.014842	A	G	-0.0103585	0.00658941	0.1159	A	G	-0.002	0.003	0.5315
1	13	rs10911301	rs10911316	T	C	183313912	-5.025	5.03e-07	0.734178	T	C	-0.0109748	0.00306778	0.000346986	T	C	-0.0182955	0.00608432	0.002642	T	C	-0.001	0.002	0.6499
1	13	rs527825	rs811886	T	C	183314011	-3.366	0.000763	0.632137	T	C	-0.00768666	0.00333511	0.0211793	T	C	-0.0103762	0.00659223	0.1155	T	C	-0.001	0.003	0.5869
1	13	rs527825	rs813293	T	C	183314026	-3.364	0.0007672	0.632137	T	C	-0.00766154	0.0033352	0.0216087	T	C	-0.0104879	0.006592	0.1116	T	C	-0.001	0.003	0.5807
1	13	rs10911301	rs944190	T	G	183314293	2.66	0.007824	0.67864	T	G	0.00480096	0.0029583	0.104616	T	G	0.0025368	0.00513523	0.6212	T	G	0.002	0.003	0.3708
1	13	rs10911301	rs1360277	A	T	183314641	2.638	0.008343	0.670485	A	T	0.00585409	0.00311527	0.0602223	A	T	0.0049899	0.00618328	0.4199	A	T	0.002	0.003	0.4245
1	13	rs527825	rs509168	A	G	183315483	-3.368	0.0007577	0.65224	A	G	-0.00715579	0.00318161	0.0245055	A	G	-0.00677224	0.00549249	0.2177	A	G	-0.001	0.003	0.6559
1	13	rs10911301	rs10911317	A	G	183316328	5.238	1.62e-07	0.962164	A	G	0.0118674	0.00307431	0.000113305	A	G	0.0178726	0.0060874	0.003326	A	G	0.001	0.002	0.7536
1	13	rs10911301	rs3924298	T	G	183317819	-2.435	0.0149	0.69957	T	G	-0.00468671	0.00294904	0.112008	T	G	-0.00309169	0.00512718	0.5463	T	G	-0.002	0.002	0.4918
1	13	rs527825	rs649614	T	C	183320192	5.897	3.71e-09	0.892733	T	C	0.0131397	0.0031155	2.46986e-05	T	C	0.0201013	0.00617172	0.001124	T	C	0	0.003	0.9382
1	13	rs10911301	rs779152	A	G	183322317	-5.227	1.72e-07	0.9023	A	G	-0.0115039	0.00307217	0.00018072	A	G	-0.0167547	0.00608597	0.005903	A	G	-0.001	0.002	0.8353
1	13	rs527825	rs481157	T	C	183323001	-3.406	0.0006582	0.660741	T	C	-0.00710125	0.00317311	0.0252246	T	C	-0.00638187	0.00548742	0.2448	T	C	-0.001	0.003	0.5875
1	13	rs10911301	rs10911318	T	C	183323643	5.276	1.32e-07	0.939687	T	C	0.0100836	0.00292378	0.000563059	T	C	0.00990508	0.00506136	0.05034	T	C	0.001	0.002	0.7563
1	13	rs527825	rs564146	A	G	183323708	-5.897	3.71e-09	0.892733	A	G	-0.0131522	0.00311534	2.42406e-05	A	G	-0.0201337	0.00617218	0.001104	A	G	0	0.003	0.8855
1	13	rs10911301	rs12125953	A	G	183323804	5.28	1.3e-07	0.939687	A	G	0.0117969	0.00307487	0.000124778	A	G	0.0171439	0.00608802	0.004868	A	G	0.001	0.002	0.7511
1	13	rs527825	rs681054	T	C	183324354	-5.905	3.52e-09	0.892733	T	C	-0.0131255	0.0031165	2.53537e-05	T	C	-0.0200532	0.0061721	0.001159	T	C	0	0.003	0.8819
1	13	rs527825	rs664422	T	C	183325722	5.927	3.08e-09	0.892733	T	C	0.0116592	0.0029635	8.3452e-05	T	C	0.0130084	0.00513151	0.01125	T	C	0	0.003	0.8522
1	13	rs527825	rs502870	T	G	183325796	-5.867	4.44e-09	0.889123	T	G	-0.0120306	0.00296231	4.88151e-05	T	G	-0.013029	0.00513157	0.01111	T	G	-0.001	0.003	0.788
1	13	rs527825	rs548292	A	G	183326828	-5.913	3.36e-09	0.892733	A	G	-0.013189	0.00311657	2.31741e-05	A	G	-0.0202137	0.00617212	0.001058	A	G	0	0.003	0.8839
1	13	rs10911301	rs634375	T	C	183327866	5.275	1.33e-07	0.909562	T	C	0.00920547	0.00292142	0.00162698	T	C	0.00909268	0.00505992	0.07237	T	C	0	0.002	0.872
1	13	rs527825	rs2811557	T	C	183330255	-3.543	0.000395	0.657994	T	C	-0.00771853	0.00325131	0.0175975	T	C	-0.00825001	0.0059826	0.1679	T	C	-0.001	0.003	0.6605
1	13	rs10911301	rs2811558	T	G	183330413	5.32	1.04e-07	0.909562	T	G	0.00921281	0.00292137	0.00161274	T	G	0.00901712	0.00506011	0.07475	T	G	0	0.002	0.8906
1	13	rs527825	rs554395	C	G	183333554	-5.799	6.68e-09	0.924631	C	G	-0.0110809	0.0029471	0.000169959	C	G	-0.0135036	0.00511306	0.008275	C	G	0	0.003	0.9289
1	13	rs10911301	rs2485931	G	A	183333785	NA	NA	0.9023	NA	NA	NA	NA	NA	A	G	0.0164992	0.00608603	0.006707	NA	NA	NA	NA	NA
1	13	rs527825	rs2788059	A	T	183333805	NA	NA	0.924631	NA	NA	NA	NA	NA	A	T	-0.0220396	0.00615117	0.0003394	NA	NA	NA	NA	NA
1	13	rs527825	rs502849	T	C	183335467	-5.825	5.7e-09	0.924631	T	C	-0.0111685	0.00294819	0.000151698	T	C	-0.0134543	0.00511374	0.008526	T	C	0	0.003	0.9684
1	13	rs527825	rs502937	T	C	183335495	5.796	6.79e-09	0.924631	T	C	0.0111441	0.00294709	0.000155947	T	C	0.0136024	0.00511368	0.007814	T	C	0	0.003	0.9523
1	13	rs527825	rs542349	A	G	183337933	-3.502	0.0004622	0.662911	A	G	-0.00714278	0.0031734	0.0243964	A	G	-0.00616882	0.00548827	0.2611	A	G	-0.001	0.003	0.6315
1	13	rs10911301	rs673593	T	G	183338207	5.241	1.6e-07	0.909562	T	G	0.0110824	0.0029961	0.000216511	T	G	0.0135556	0.00551714	0.01399	T	G	0.001	0.002	0.7977
1	13	rs527825	rs2811559	A	G	183338826	5.874	4.25e-09	0.932675	A	G	0.0130359	0.0031002	2.61225e-05	A	G	0.0219898	0.00614928	0.0003483	A	G	0	0.002	0.9395
1	13	rs527825	rs525138	T	C	183339985	-3.618	0.0002972	0.687892	T	C	-0.00801792	0.00326498	0.0140597	T	C	-0.00762639	0.00600031	0.2036	T	C	-0.001	0.003	0.606
1	13	rs527825	rs526845	C	G	183340129	3.507	0.0004533	0.673385	C	G	0.00786198	0.00327066	0.0162263	C	G	0.00716383	0.00600489	0.233	C	G	0.001	0.003	0.5986
1	13	rs527825	rs527825	A	G	183340238	-6.006	1.9e-09	1	A	G	-0.0120204	0.00295094	4.63305e-05	A	G	-0.0143232	0.00511909	0.005147	A	G	0	0.003	0.9816
1	13	rs527825	rs2485932	A	G	183343362	-5.936	2.92e-09	0.983601	A	G	-0.0118906	0.00294954	5.54642e-05	A	G	-0.0141603	0.0051194	0.005682	A	G	0	0.003	0.9837
1	13	rs527825	rs2788058	A	G	183345203	-5.914	3.35e-09	0.983594	A	G	-0.0118186	0.00294803	6.09786e-05	A	G	-0.0142515	0.00511908	0.005372	A	G	0	0.003	0.9798
1	13	rs527825	rs2811562	T	G	183345452	-3.486	0.0004897	0.682842	T	G	-0.00750189	0.00318935	0.0186643	T	G	-0.00676869	0.00551196	0.2195	T	G	-0.001	0.003	0.615
1	13	rs527825	rs2788057	A	T	183345707	-5.935	2.95e-09	0.983594	A	T	-0.0123698	0.00302358	4.29304e-05	A	T	-0.0165882	0.00558148	0.002957	A	T	0	0.003	0.9803
1	13	rs527825	rs2811563	T	C	183346669	-5.917	3.28e-09	0.983594	T	C	-0.0118034	0.00294866	6.25496e-05	T	C	-0.0139852	0.00511902	0.006301	T	C	0	0.003	0.9892
1	13	rs527825	rs1933540	T	C	183347324	-5.904	3.55e-09	0.983594	T	C	-0.0134005	0.00310101	1.55077e-05	T	C	-0.0218278	0.00615736	0.0003922	T	C	0	0.003	0.9934
1	13	rs10911301	rs3122177	T	C	183348252	-5.203	1.97e-07	0.804839	T	C	-0.0103625	0.00303393	0.000636586	T	C	-0.0141498	0.00575429	0.01393	T	C	0	0.002	0.8983
1	13	rs527825	rs1338379	T	C	183349557	5.968	2.4e-09	0.99183	T	C	0.0118799	0.00294817	5.5871e-05	T	C	0.0139226	0.0051186	0.006533	T	C	0	0.003	0.9649
1	13	rs527825	rs1338378	A	T	183351256	-5.901	3.61e-09	0.983594	A	T	-0.0134319	0.00310099	1.48112e-05	A	T	-0.0219863	0.00615691	0.0003556	A	T	0	0.003	0.961
1	13	rs527825	rs2811565	A	T	183351784	3.451	0.0005582	0.682842	A	T	0.00837757	0.00334798	0.0123399	A	T	0.0101561	0.00662931	0.1255	A	T	0.001	0.003	0.6127
1	13	rs527825	rs2185081	T	C	183353730	3.444	0.0005723	0.682842	T	C	0.00826179	0.00334802	0.0135996	T	C	0.00958876	0.00663123	0.1482	T	C	0.001	0.003	0.6151
1	13	rs527825	rs2022013	T	C	183353853	5.945	2.76e-09	0.99183	T	C	0.0118927	0.0029482	5.48616e-05	T	C	0.0138875	0.00511887	0.00666	T	C	0	0.003	0.9585
1	13	rs527825	rs1819628	T	C	183358440	-3.385	0.000713	0.682842	T	C	-0.00726835	0.00318904	0.0226574	T	C	-0.00611407	0.00551314	0.2675	T	C	-0.001	0.003	0.6058
1	13	rs10911301	rs2811566	A	G	183362544	5.262	1.42e-07	0.827196	A	G	0.00913418	0.00292752	0.00180784	A	G	0.00968542	0.00506825	0.05601	A	G	0	0.002	0.8915
1	13	rs10911301	rs2788060	T	C	183362646	5.229	1.7e-07	0.827196	T	C	0.00904887	0.00292758	0.00199545	T	C	0.00943159	0.00506802	0.06272	T	C	0	0.002	0.8912
1	13	rs527825	rs7527227	T	C	183368916	NA	NA	0.678752	T	C	-0.0057646	0.00483804	0.233451	T	C	-0.0100206	0.00663178	0.1307	T	C	-0.001	0.003	0.6207
1	13	rs10911301	rs9425595	T	C	183369036	NA	NA	0.827196	T	C	0.00778413	0.00444717	0.0800567	T	C	0.0163609	0.00609572	0.007281	T	C	0	0.002	0.9792
1	13	rs10911301	rs12145853	A	G	183369250	NA	NA	0.827196	NA	NA	NA	NA	NA	NA	NA	NA	NA	NA	NA	NA	NA	NA	NA
1	13	rs527825	rs9727605	A	C	183369460	NA	NA	0.678752	NA	NA	NA	NA	NA	NA	NA	NA	NA	NA	NA	NA	NA	NA	NA
1	13	rs527825	rs6676089	T	C	183369779	NA	NA	0.678752	T	C	-0.00778502	0.00483455	0.107335	T	C	-0.0100797	0.006627	0.1282	T	C	-0.003	0.003	0.3058
1	13	rs527825	rs6663425	G	A	183369780	NA	NA	0.678752	NA	NA	NA	NA	NA	A	G	0.0100797	0.006627	0.1282	NA	NA	NA	NA	NA
1	13	rs10911301	rs6690052	A	T	183370057	-5.25	1.52e-07	0.827196	A	T	-0.0105768	0.003079	0.000592257	A	T	-0.0161905	0.00609583	0.00791	A	T	0	0.002	0.9462
1	13	rs527825	rs3120798	T	C	183373665	-3.36	0.0007793	0.675659	T	C	-0.00697718	0.00318242	0.0283496	T	C	-0.0060041	0.00551341	0.276	T	C	-0.001	0.003	0.7748
1	13	rs527825	rs3120799	A	G	183373841	-3.36	0.0007795	0.675659	A	G	-0.00801168	0.00334859	0.0167317	A	G	-0.00990209	0.00663235	0.1355	A	G	-0.001	0.003	0.7688
1	13	rs527825	rs2788061	A	G	183374040	-3.355	0.0007923	0.675659	A	G	-0.00706589	0.0031842	0.0264833	A	G	-0.00618596	0.00551334	0.2618	A	G	-0.001	0.003	0.7689
1	13	rs527825	rs10732975	T	C	183374722	3.313	0.0009244	0.635966	T	C	0.00695866	0.00316651	0.027979	T	C	0.00590544	0.00549855	0.2829	T	C	0.001	0.003	0.6746
1	13	rs527825	rs2788063	T	C	183375311	-3.342	0.0008316	0.675659	T	C	-0.00687864	0.00318994	0.0310558	T	C	-0.00576891	0.00551521	0.2956	T	C	-0.001	0.003	0.7427
1	13	rs527825	rs2702183	A	G	183375601	-3.36	0.0007804	0.675659	A	G	-0.0068761	0.00319003	0.0311229	A	G	-0.00575789	0.00551522	0.2967	A	G	-0.001	0.003	0.753
1	13	rs527825	rs2788065	T	C	183377675	-3.369	0.0007537	0.675659	T	C	-0.00709245	0.00318261	0.0258473	T	C	-0.00623755	0.00550049	0.2568	T	C	-0.001	0.003	0.717
1	13	rs527825	rs1361197	T	C	183380407	-5.752	8.82e-09	0.940549	T	C	-0.0115643	0.0029413	8.43482e-05	T	C	-0.0143265	0.00511111	0.005059	T	C	0	0.002	0.9932
1	13	rs10911301	rs1361198	T	G	183380611	-5.155	2.54e-07	0.855041	T	G	-0.00912352	0.00293056	0.00185047	T	G	-0.00999342	0.00507023	0.04878	T	G	0	0.002	0.94
1	13	rs527825	rs2485935	T	G	183380702	-3.344	0.0008252	0.675659	T	G	-0.00788721	0.00334734	0.0184601	T	G	-0.00963052	0.00663259	0.1465	T	G	-0.001	0.003	0.8111
1	13	rs527825	rs7539430	T	C	183381444	3.303	0.0009552	0.670825	T	C	0.00772942	0.00328273	0.0185441	T	C	0.0125905	0.00653034	0.05388	T	C	0.001	0.003	0.7113
1	13	rs527825	rs7539602	A	C	183381613	3.331	0.0008644	0.670825	A	C	0.00772659	0.0032827	0.0185863	A	C	0.0125758	0.0065295	0.05416	A	C	0.001	0.003	0.6738
1	13	rs527825	rs10911330	T	G	183382989	3.322	0.0008926	0.670825	T	G	0.00774063	0.00328278	0.0183763	T	G	0.0126226	0.00653005	0.05327	T	G	0.001	0.003	0.7049
1	13	rs527825	rs2788043	A	T	183383362	3.399	0.0006758	0.709387	A	T	0.00691841	0.00325126	0.033344	A	T	0.00896195	0.00618066	0.1471	A	T	0.001	0.003	0.808
1	13	rs10911301	rs4652800	T	C	183383643	-5.177	2.26e-07	0.855041	T	C	-0.00903813	0.00293062	0.00204213	T	C	-0.00968397	0.00507014	0.05615	T	C	0	0.002	0.9639
1	13	rs10911301	rs12745288	A	G	183384395	5.175	2.27e-07	0.855041	A	G	0.0104882	0.003082	0.000666349	A	G	0.0162416	0.006099	0.007734	A	G	0	0.002	0.9806
1	13	rs527825	rs2788045	A	G	183384796	3.303	0.0009551	0.709387	A	G	0.00681336	0.00313594	0.0298054	A	G	0.0082153	0.0054406	0.131	A	G	0.001	0.003	0.77
1	13	rs10911301	rs12035399	A	G	183386537	-5.308	1.11e-07	0.838336	A	G	-0.0106129	0.00308193	0.000574076	A	G	-0.0163792	0.00609799	0.007224	A	G	0	0.002	0.9664
1	13	rs527825	rs1815590	T	C	183386828	3.342	0.0008304	0.667564	T	C	0.00696464	0.00318417	0.0287225	T	C	0.00614153	0.00550317	0.2645	T	C	0.001	0.003	0.7384
1	13	rs10911301	rs12074508	T	C	183388259	-5.171	2.33e-07	0.832177	T	C	-0.0106036	0.0030815	0.000579475	T	C	-0.016514	0.00609821	0.006777	T	C	0	0.002	0.9324
1	13	rs527825	rs2702189	T	C	183389150	3.422	0.0006225	0.670448	T	C	0.00707227	0.0031883	0.0265417	T	C	0.00602338	0.00552604	0.2757	T	C	0.001	0.003	0.7948
1	13	rs527825	rs2788047	A	G	183389460	-3.467	0.0005272	0.670448	A	G	-0.00795006	0.00335479	0.0177995	A	G	-0.00901753	0.006655	0.1755	A	G	-0.001	0.003	0.8136
1	13	rs527825	rs2788048	A	G	183389877	-3.527	0.0004203	0.670448	A	G	-0.00736286	0.00318845	0.0209309	A	G	-0.0057795	0.00552534	0.2954	A	G	-0.001	0.003	0.8304
1	13	rs527825	rs2702191	A	T	183391524	3.539	0.0004009	0.670448	A	T	0.00792823	0.00334407	0.017748	A	T	0.0091204	0.0066282	0.1688	A	T	0	0.003	0.8863
1	13	rs10911301	rs12731807	T	G	183394037	5.319	1.04e-07	0.843199	T	G	0.0087804	0.0029309	0.00273721	T	G	0.00949672	0.00507033	0.061	T	G	-0.001	0.002	0.808
1	13	rs527825	rs2485937	T	G	183394535	-3.526	0.0004224	0.670448	T	G	-0.00829432	0.00335317	0.0133768	T	G	-0.00913817	0.00664594	0.1692	T	G	-0.001	0.003	0.8331
1	13	rs527825	rs2702196	T	C	183396348	NA	NA	0.668331	T	C	-0.00373529	0.00482943	0.43926	T	C	-0.00785137	0.00662004	0.2356	T	C	0	0.003	0.9665
1	13	rs527825	rs2464366	T	C	183396401	NA	NA	0.670448	T	C	-0.00516021	0.00484824	0.287171	T	C	-0.00874588	0.0066458	0.1882	T	C	-0.001	0.003	0.7006
1	13	rs527825	rs2264754	A	G	183396427	NA	NA	0.663305	A	G	-0.00632827	0.00484669	0.191659	A	G	-0.00910183	0.00664367	0.1707	A	G	-0.002	0.003	0.5513
1	13	rs527825	rs2485938	A	G	183396474	NA	NA	0.663305	NA	NA	NA	NA	NA	A	G	-0.00869569	0.00663793	0.1901	NA	NA	NA	NA	NA
1	13	rs527825	rs2485939	A	T	183396610	NA	NA	0.668331	A	T	-0.00517334	0.00484869	0.285992	A	T	-0.00877328	0.00664643	0.187	A	T	-0.001	0.003	0.8038
1	13	rs527825	rs2702197	A	C	183397041	NA	NA	0.668331	A	C	-0.00524743	0.00484703	0.278983	A	C	-0.00892972	0.00664414	0.179	A	C	-0.001	0.003	0.7619
1	13	rs527825	rs2702198	A	G	183397087	NA	NA	0.668331	A	G	-0.00516674	0.00484843	0.286581	A	G	-0.00875951	0.00664607	0.1875	A	G	-0.001	0.003	0.7259
1	13	rs527825	rs2811551	A	C	183397589	3.494	0.000476	0.668331	A	C	0.00728296	0.00318704	0.0223023	A	C	0.00543661	0.00552501	0.3251	A	C	0.001	0.003	0.8307
1	13	rs527825	rs2993476	C	G	183398233	3.5	0.0004651	0.668331	C	G	0.00730697	0.00318796	0.0219027	C	G	0.00581076	0.00552354	0.2926	C	G	0.001	0.003	0.8439
1	13	rs527825	rs4652801	T	G	183398527	3.364	0.0007671	0.661408	T	G	0.00686316	0.00318022	0.0309221	T	G	0.00542299	0.00551677	0.3256	T	G	0.001	0.003	0.8445
1	13	rs10911301	rs1338373	A	G	183399613	4.808	1.53e-06	0.800266	A	G	0.00999604	0.00309148	0.00122319	A	G	0.0163442	0.00611454	0.007523	A	G	0	0.002	0.9801
1	13	rs527825	rs2788056	T	C	183400890	-3.358	0.0007863	0.666387	T	C	-0.00712565	0.00317671	0.0248908	T	C	-0.00582029	0.00550122	0.29	T	C	-0.001	0.003	0.8453
1	13	rs10911301	rs10752912	A	G	183401215	4.74	2.14e-06	0.800266	A	G	0.00851551	0.00293961	0.00376971	A	G	0.00943443	0.0050832	0.06341	A	G	0	0.002	0.9905
1	13	rs10911301	rs2023600	T	C	183401670	-5.216	1.83e-07	0.80752	T	C	-0.00878985	0.00292066	0.00261638	T	C	-0.00826915	0.00506068	0.1022	T	C	0.001	0.002	0.7999
1	13	rs527825	rs2702199	T	C	183401880	-3.331	0.0008645	0.671393	T	C	-0.00702717	0.00317781	0.0270135	T	C	-0.00552004	0.00550353	0.3157	T	C	-0.001	0.003	0.8311
1	13	rs10911301	rs12074081	A	G	183402201	4.869	1.12e-06	0.800266	A	G	0.0101858	0.00309125	0.000984114	A	G	0.0163216	0.00611526	0.007605	A	G	0	0.002	0.9262
1	13	rs10911301	rs7531089	C	G	183403843	5.295	1.19e-07	0.608782	C	G	0.00898555	0.00300774	0.00281291	C	G	0.0109451	0.00554746	0.04851	C	G	-0.002	0.002	0.32
1	13	rs4652802	rs10911334	C	G	183405382	-5.923	3.16e-09	0.987608	C	G	-0.011787	0.00308546	0.00013335	C	G	-0.012754	0.00610529	0.03669	C	G	0.003	0.002	0.1729
1	13	rs4652802	rs6424896	T	C	183405648	5.562	2.67e-08	0.746302	T	C	0.0105872	0.00306862	0.000560239	T	C	0.0106987	0.00608228	0.07855	T	C	-0.002	0.002	0.3265
1	13	rs4652802	rs6684015	A	G	183405794	-5.55	2.86e-08	0.746302	A	G	-0.00909853	0.00291787	0.00181952	A	G	-0.00761538	0.00505669	0.132	A	G	0.003	0.002	0.3108
1	13	rs4652802	rs6659327	A	G	183405853	5.571	2.53e-08	0.743151	A	G	0.00964175	0.00291792	0.000952068	A	G	0.00741863	0.00505701	0.1425	A	G	-0.002	0.002	0.3234
1	13	rs4652802	rs3965889	A	G	183407953	5.928	3.06e-09	0.991698	A	G	0.0114775	0.00308528	0.000199151	A	G	0.0141857	0.00610663	0.02016	A	G	-0.004	0.002	0.1546
1	13	rs4652802	rs2333659	T	G	183409445	NA	NA	0.662346	NA	NA	NA	NA	NA	T	G	-0.0150348	0.00608942	0.01357	NA	NA	NA	NA	NA
1	13	rs4652802	rs12039578	A	G	183413886	-5.978	2.26e-09	0.995871	A	G	-0.0114458	0.00308515	0.000207289	A	G	-0.0139765	0.00610592	0.02205	A	G	0.004	0.002	0.1567
1	13	rs4652802	rs17558314	T	C	183415188	-5.961	2.51e-09	0.995871	T	C	-0.0114495	0.00308545	0.000206599	T	C	-0.0141908	0.00610618	0.02011	T	C	0.004	0.002	0.1449
1	13	rs4652802	rs4047801	A	G	183415318	5.539	3.04e-08	0.751269	A	G	0.00990985	0.00291788	0.000683165	A	G	0.00860579	0.00505628	0.08879	A	G	-0.002	0.002	0.3146
1	13	rs4652802	rs11808408	A	G	183415589	-5.98	2.23e-09	0.987552	A	G	-0.0114445	0.00308551	0.000207981	A	G	-0.014191	0.00610629	0.02013	A	G	0.004	0.002	0.1451
1	13	rs4652802	rs3856126	T	G	183416374	-5.978	2.26e-09	0.995871	T	G	-0.0114608	0.00308499	0.000203182	T	G	-0.0142399	0.00610628	0.0197	T	G	0.004	0.002	0.1138
1	13	rs4652802	rs11580188	C	G	183422622	3.602	0.0003152	0.673086	C	G	0.00655015	0.00329569	0.0468679	C	G	0.00472947	0.00648762	0.4658	C	G	-0.003	0.003	0.2223
1	13	rs4652802	rs7550777	T	C	183425047	-5.968	2.41e-09	1	T	C	-0.0113146	0.00308629	0.000246302	T	C	-0.0143186	0.00610863	0.0191	T	C	0.004	0.002	0.1523
1	13	rs4652802	rs4652802	A	G	183426758	5.981	2.22e-09	1	A	G	0.0109838	0.00293484	0.000182166	A	G	0.0103808	0.00507867	0.04096	A	G	-0.003	0.002	0.1581
1	13	rs4652802	rs3905118	T	C	183441977	-3.691	0.0002233	0.652151	T	C	-0.00690127	0.0032854	0.035677	T	C	-0.00483555	0.0064733	0.4553	T	C	0.003	0.003	0.2824
1	13	rs4652802	rs11583652	G	A	183446715	NA	NA	0.639695	A	G	-0.000925226	0.00472573	0.844779	A	G	0.00419771	0.00647795	0.5171	A	G	-0.003	0.003	0.2557
1	13	rs4652802	rs2226099	T	C	183449357	-3.667	0.0002458	0.653309	T	C	-0.00664917	0.00312373	0.0332876	T	C	-0.00435323	0.005381	0.4186	T	C	0.003	0.003	0.2923
1	13	rs4652802	rs4652806	T	C	183456476	-3.665	0.0002475	0.652151	T	C	-0.00692047	0.00328661	0.0352344	T	C	-0.00476137	0.00646926	0.4617	T	C	0.003	0.003	0.3347
1	13	rs4652802	rs11587738	T	C	183463271	-3.67	0.0002424	0.652151	T	C	-0.00690649	0.00328656	0.0356029	T	C	-0.00473046	0.00647122	0.4648	T	C	0.003	0.003	0.3256
1	13	rs4652802	rs2877978	A	G	183496658	3.623	0.0002914	0.647213	A	G	0.00678293	0.00312477	0.0299539	A	G	0.00476572	0.00537892	0.3755	A	G	-0.003	0.003	0.283
1	13	rs4652802	rs9425305	C	T	183512085	NA	NA	0.649016	NA	NA	NA	NA	NA	T	C	0.00419059	0.00647696	0.5175	NA	NA	NA	NA	NA
1	13	rs4652802	rs9425306	A	G	183529654	-3.452	0.0005574	0.664022	A	G	-0.00615373	0.00329452	0.0617802	A	G	-0.00411368	0.00648845	0.526	A	G	0.004	0.003	0.1417
1	14	rs1953522	rs10863262	T	C	216825980	-5.056	4.28e-07	0.77894	T	C	-0.0139671	0.00306342	5.13247e-06	T	C	-0.0121462	0.00533662	0.02283	T	C	-0.007	0.003	0.0074
1	14	rs1953522	rs1953522	A	C	216837241	-5.575	2.47e-08	1	A	C	-0.0144737	0.00314805	4.27256e-06	A	C	-0.0142715	0.00626218	0.02268	A	C	-0.006	0.003	0.01656
2	15	rs12713315	rs62167289	T	C	56413253	4.735	2.19e-06	0.654873	T	C	0.00949085	0.00367601	0.00982757	T	C	-0.00562127	0.00714266	0.4313	T	C	0	0.003	0.9754
2	15	rs12713315	rs62167290	T	C	56413281	4.784	1.72e-06	0.654873	T	C	0.0097735	0.00367612	0.0078456	T	C	-0.00576673	0.00714589	0.4199	T	C	0	0.003	0.9267
2	15	rs12713315	rs11694431	A	G	56416599	4.704	2.55e-06	0.658613	A	G	0.00861676	0.0036694	0.0188606	A	G	-0.00563087	0.00714578	0.4306	A	G	-0.001	0.003	0.8557
2	15	rs12713315	rs11694444	T	C	56416772	4.691	2.71e-06	0.658613	T	C	0.00921408	0.00366957	0.012041	T	C	-0.00533973	0.00713868	0.4547	T	C	0	0.003	0.944
2	15	rs12713315	rs11695826	C	G	56417211	4.725	2.3e-06	0.661954	C	G	0.00888983	0.00365723	0.0150672	C	G	-0.0076353	0.00711584	0.2833	C	G	0	0.003	0.8883
2	15	rs12713315	rs1030090	T	C	56439314	4.031	5.55e-05	0.703257	T	C	0.00591528	0.00326092	0.0696793	T	C	-0.00427005	0.00560373	0.4459	T	C	-0.001	0.003	0.6981
2	15	rs12713315	rs59813060	A	T	56443479	-4.731	2.24e-06	0.81464	A	T	-0.00961674	0.00355539	0.00683381	A	T	0.00441391	0.006962	0.5261	A	T	-0.001	0.003	0.8317
2	15	rs12713315	rs17047623	T	C	56443708	4.734	2.21e-06	0.81464	T	C	0.00842568	0.00338088	0.012697	T	C	-0.00406319	0.00578802	0.4826	T	C	0.001	0.003	0.8177
2	15	rs12713315	rs1549028	C	G	56451039	4.672	2.99e-06	0.819525	C	G	0.00811565	0.00336909	0.0160028	C	G	-0.00554877	0.00576795	0.3362	C	G	0.001	0.003	0.7886
2	15	rs12713315	rs6545560	A	G	56452097	-4.724	2.31e-06	0.818348	A	G	-0.00778978	0.00336582	0.0206469	A	G	0.00588816	0.00575578	0.3062	A	G	-0.001	0.003	0.8253
2	15	rs12713315	rs12713315	T	C	56458509	-5.524	3.31e-08	1	T	C	-0.00908394	0.00324289	0.00509156	T	C	0.00754941	0.00557564	0.1758	T	C	-0.002	0.003	0.5032
2	15	rs12713315	rs985792	T	G	56464559	-4.657	3.21e-06	0.823227	T	G	-0.00772977	0.00335711	0.0213065	T	G	0.00492564	0.00576099	0.3925	T	G	0	0.003	0.8671
2	15	rs12713315	rs17047680	A	G	56466964	4.858	1.19e-06	0.818348	A	G	0.00905035	0.00336806	0.00720732	A	G	-0.0026244	0.00578062	0.6497	A	G	0.001	0.003	0.7771
2	15	rs12713315	rs6759030	A	C	56467748	-4.735	2.19e-06	0.823227	A	C	-0.00961221	0.00353716	0.00657779	A	C	0.00349263	0.0069436	0.6149	A	C	-0.001	0.003	0.8579
2	15	rs12713315	rs2080606	C	G	56472393	4.767	1.87e-06	0.879195	C	G	0.00807464	0.00341848	0.0181739	C	G	-0.00777076	0.00624157	0.2132	C	G	0.001	0.003	0.7866
2	15	rs12713315	rs214046	T	C	56491604	4.758	1.96e-06	0.784934	T	C	0.0081863	0.0034019	0.016111	T	C	-0.0034053	0.00636505	0.5928	T	C	0.002	0.003	0.5597
2	15	rs12713315	rs214045	A	G	56496589	4.752	2.02e-06	0.741479	A	G	0.00691201	0.00322339	0.0320063	A	G	-0.00196353	0.00554669	0.7232	A	G	0.001	0.003	0.6064
2	16	rs889956	rs17298978	T	C	57203530	-3.951	7.79e-05	0.73964	T	C	-0.0130373	0.00324472	5.86976e-05	T	C	-0.0149541	0.0064098	0.01965	T	C	-0.009	0.003	0.0004878
2	16	rs889956	rs34178507	T	C	57203875	-3.953	7.7e-05	0.73964	T	C	-0.0130581	0.00324446	5.70387e-05	T	C	-0.0150565	0.00640975	0.01884	T	C	-0.009	0.003	0.0004691
2	16	rs889956	rs12612912	A	G	57210018	-3.611	0.0003051	0.610094	A	G	-0.0137152	0.00308573	8.80083e-06	A	G	-0.0116251	0.00610885	0.05708	A	G	-0.007	0.002	0.002848
2	16	rs889956	rs12619563	A	T	57213078	-4.211	2.54e-05	0.672494	A	T	-0.0141648	0.00328729	1.64037e-05	A	T	-0.0180338	0.00651744	0.005664	A	T	-0.01	0.003	0.000253
2	16	rs889956	rs7592397	A	G	57213587	4.022	5.77e-05	0.710767	A	G	0.0129556	0.0032278	5.97576e-05	A	G	0.0154617	0.00637859	0.01536	A	G	0.009	0.003	0.000485
2	16	rs889956	rs1366798	T	G	57218797	-3.386	0.0007093	0.61911	T	G	-0.0146368	0.00300463	1.108e-06	T	G	-0.0115703	0.00553071	0.03644	T	G	-0.009	0.002	0.0003421
2	16	rs889956	rs9789665	T	G	57219996	4.052	5.08e-05	0.670107	T	G	0.0124806	0.00318327	8.82933e-05	T	G	0.0139026	0.00630789	0.02752	T	G	0.01	0.003	6.97e-05
2	16	rs889956	rs9789567	A	G	57220127	NA	NA	0.651452	A	G	-0.016235	0.0046301	0.000454209	A	G	-0.0140641	0.0063466	0.02671	A	G	-0.01	0.003	0.0001141
2	16	rs889956	rs12994359	T	C	57221708	-3.439	0.0005832	0.627504	T	C	-0.0101754	0.00315637	0.00126515	T	C	-0.0114779	0.00626523	0.06696	T	C	-0.009	0.003	0.0002545
2	16	rs889956	rs2115606	A	G	57238715	-3.98	6.9e-05	0.698257	A	G	-0.0134396	0.00304911	1.04478e-05	A	G	-0.0154555	0.00527491	0.003394	A	G	-0.01	0.003	5.715e-05
2	16	rs889956	rs2902969	A	G	57243213	-3.991	6.57e-05	0.688173	A	G	-0.0118066	0.00317253	0.000198035	A	G	-0.0119193	0.0062965	0.05833	A	G	-0.01	0.003	9.945e-05
2	16	rs889956	rs11682352	A	G	57243669	NA	NA	0.714074	A	G	-0.0172046	0.00461072	0.000190389	A	G	-0.0141885	0.00632003	0.02479	A	G	-0.011	0.003	3.78e-05
2	16	rs889956	rs71416462	G	T	57245066	NA	NA	0.694204	NA	NA	NA	NA	NA	T	G	0.0144915	0.00631987	0.02186	NA	NA	NA	NA	NA
2	16	rs889956	rs201698334	C	T	57245069	NA	NA	0.640102	NA	NA	NA	NA	NA	T	C	0.0144815	0.0062474	0.02047	NA	NA	NA	NA	NA
2	16	rs889956	rs199970096	T	G	57245426	NA	NA	0.679178	NA	NA	NA	NA	NA	T	G	-0.0123893	0.00628901	0.04889	NA	NA	NA	NA	NA
2	16	rs889956	rs144902484	A	G	57246100	NA	NA	0.686805	A	G	-0.015109	0.00459436	0.00100692	A	G	-0.0118523	0.00629769	0.05981	A	G	-0.01	0.003	8.526e-05
2	16	rs889956	rs12614256	A	G	57246394	NA	NA	0.706822	A	G	-0.0181932	0.00460974	7.92377e-05	A	G	-0.0142739	0.00631868	0.0239	A	G	-0.012	0.003	1.121e-05
2	16	rs889956	rs35557355	A	T	57246794	3.727	0.000194	0.650019	A	T	0.0117397	0.00315047	0.000194276	A	T	0.0142503	0.00624193	0.0224	A	T	0.011	0.003	3.253e-05
2	16	rs889956	rs1864274	A	T	57247176	3.537	0.0004045	0.636809	A	T	0.0105886	0.00298438	0.000388154	A	T	0.012794	0.00517558	0.01344	A	T	0.01	0.003	8.412e-05
2	16	rs889956	rs12615090	A	G	57247331	-3.492	0.0004796	0.636809	A	G	-0.0105133	0.00298409	0.000426527	A	G	-0.0126567	0.00517657	0.01447	A	G	-0.01	0.003	8.442e-05
2	16	rs889956	rs6545619	T	C	57250334	-4.011	6.04e-05	0.696062	T	C	-0.0121039	0.00317115	0.000135148	T	C	-0.0121195	0.00629911	0.05437	T	C	-0.01	0.003	9.415e-05
2	16	rs889956	rs6725352	A	G	57251133	-4.009	6.09e-05	0.692386	A	G	-0.0123865	0.00301839	4.0665e-05	A	G	-0.0133537	0.00523674	0.01078	A	G	-0.01	0.003	0.0001461
2	16	rs889956	rs12713322	T	C	57251353	-4.034	5.48e-05	0.691466	T	C	-0.0120983	0.00317108	0.000136075	T	C	-0.012272	0.00629977	0.05141	T	C	-0.01	0.003	8.274e-05
2	16	rs889956	rs6729976	A	G	57252485	-4.046	5.22e-05	0.699753	A	G	-0.0121314	0.00317484	0.000132856	A	G	-0.0126274	0.0063011	0.04508	A	G	-0.01	0.003	9.051e-05
2	16	rs889956	rs1594144	A	G	57254381	4.049	5.14e-05	0.699753	A	G	0.0121006	0.00317449	0.000137948	A	G	0.0125795	0.00629921	0.04587	A	G	0.01	0.003	0.000102
2	16	rs889956	rs13033975	A	G	57255375	4.349	1.37e-05	0.730216	A	G	0.014121	0.00304032	3.40776e-06	A	G	0.015802	0.00525506	0.002641	A	G	0.011	0.003	2.718e-05
2	16	rs889956	rs1429316	T	C	57259615	-4.272	1.93e-05	0.71982	T	C	-0.0134123	0.00303347	9.80481e-06	T	C	-0.0151343	0.00525861	0.004005	T	C	-0.01	0.003	5.269e-05
2	16	rs889956	rs11886848	T	C	57266771	4.263	2.02e-05	0.720534	T	C	0.0134889	0.00318742	2.31715e-05	T	C	0.0140402	0.00631302	0.02617	T	C	0.011	0.003	3.544e-05
2	16	rs889956	rs11903925	A	G	57267524	-4.343	1.41e-05	0.720534	A	G	-0.0136688	0.00303153	6.51699e-06	A	G	-0.014527	0.00525011	0.005653	A	G	-0.011	0.003	3.173e-05
2	16	rs889956	rs2115603	A	G	57270600	4.348	1.37e-05	0.762211	A	G	0.0145313	0.00301654	1.45586e-06	A	G	0.016225	0.00522377	0.001895	A	G	0.011	0.003	1.63e-05
2	16	rs889956	rs11125686	A	G	57271705	-4.346	1.38e-05	0.734134	A	G	-0.0133204	0.00319782	3.10724e-05	A	G	-0.0152043	0.00631933	0.01611	A	G	-0.01	0.003	4.106e-05
2	16	rs889956	rs7592094	A	G	57273562	4.109	3.97e-05	0.69994	A	G	0.0136143	0.00319666	2.05419e-05	A	G	0.0154192	0.00633751	0.01498	A	G	0.011	0.003	4.218e-05
2	16	rs889956	rs12614157	A	G	57276155	-4.109	3.98e-05	0.713387	A	G	-0.0139399	0.00318152	1.17851e-05	A	G	-0.0173025	0.00617285	0.00507	A	G	-0.01	0.003	6.666e-05
2	16	rs889956	rs13014873	A	C	57277288	-4.269	1.96e-05	0.738061	A	C	-0.0136559	0.00318936	1.85465e-05	A	C	-0.014797	0.00631004	0.01901	A	C	-0.011	0.003	3.046e-05
2	16	rs889956	rs1429308	T	C	57278304	4.646	3.38e-06	0.780089	T	C	0.0152445	0.003062	6.40409e-07	T	C	0.0157671	0.00563112	0.005112	T	C	0.011	0.003	2.227e-05
2	16	rs889956	rs11125688	A	G	57284436	-4.121	3.77e-05	0.717397	A	G	-0.0136294	0.00320465	2.10916e-05	A	G	-0.0151462	0.00635062	0.01707	A	G	-0.011	0.003	3.728e-05
2	16	rs889956	rs12613892	T	C	57286110	-4.009	6.09e-05	0.720282	T	C	-0.0136067	0.00320567	2.19013e-05	T	C	-0.0148285	0.00634782	0.01948	T	C	-0.011	0.003	3.166e-05
2	16	rs889956	rs11890717	G	C	57288113	NA	NA	0.69994	C	G	0.0172719	0.00462148	0.000186001	C	G	0.0142786	0.00633477	0.0242	C	G	0.011	0.003	2.147e-05
2	16	rs889956	rs11681356	C	G	57288661	4.275	1.91e-05	0.768888	C	G	0.0139669	0.00317151	1.06341e-05	C	G	0.0143984	0.00628201	0.02193	C	G	0.012	0.003	6.1e-06
2	16	rs889956	rs13028110	A	G	57289907	4.271	1.95e-05	0.762211	A	G	0.0136222	0.00317086	1.73865e-05	A	G	0.0144426	0.00627941	0.02144	A	G	0.011	0.003	7.589e-06
2	16	rs889956	rs11125689	A	G	57291909	4.268	1.98e-05	0.762211	A	G	0.0144813	0.00301531	1.56618e-06	A	G	0.017039	0.0052203	0.001097	A	G	0.011	0.003	7.696e-06
2	16	rs889956	rs11125690	C	G	57292845	4.277	1.89e-05	0.731319	C	G	0.0133034	0.00319262	3.08742e-05	C	G	0.0144219	0.00631157	0.02231	C	G	0.011	0.003	1.662e-05
2	16	rs889956	rs56404507	A	G	57294291	NA	NA	0.614947	A	G	-0.0159467	0.00471993	0.000728608	A	G	-0.0130689	0.00646977	0.04337	A	G	-0.01	0.003	0.0001786
2	16	rs889956	rs10496062	T	C	57300389	-4.07	4.7e-05	0.737062	T	C	-0.0130942	0.00303402	1.59027e-05	T	C	-0.0153064	0.00525992	0.003611	T	C	-0.01	0.003	6.684e-05
2	16	rs889956	rs12995674	T	C	57301014	4.332	1.48e-05	0.735223	T	C	0.0132706	0.00319316	3.23941e-05	T	C	0.0145053	0.00631212	0.02158	T	C	0.011	0.003	1.861e-05
2	16	rs889956	rs12988904	A	G	57303414	4.406	1.05e-05	0.758406	A	G	0.014402	0.00302148	1.87426e-06	A	G	0.0167028	0.00522124	0.001377	A	G	0.011	0.003	6.563e-06
2	16	rs889956	rs1863047	A	G	57304613	-4.124	3.72e-05	0.765348	A	G	-0.0144021	0.00304676	2.27833e-06	A	G	-0.0169235	0.00526557	0.00131	A	G	-0.011	0.003	4.152e-05
2	16	rs889956	rs1863048	A	C	57304659	4.285	1.83e-05	0.780505	A	C	0.0143783	0.00302906	2.06684e-06	A	C	0.0172491	0.00523334	0.0009813	A	C	0.011	0.003	1.052e-05
2	16	rs889956	rs11691347	A	C	57305317	-4.244	2.2e-05	0.753929	A	C	-0.0139059	0.00304526	4.96115e-06	A	C	-0.0163495	0.00526216	0.001891	A	C	-0.011	0.003	2.359e-05
2	16	rs889956	rs718351	A	T	57305425	4.195	2.73e-05	0.753929	A	T	0.013786	0.00304419	5.93658e-06	A	T	0.016033	0.00526017	0.002304	A	T	0.011	0.003	2.129e-05
2	16	rs889956	rs62160043	C	G	57306388	4.154	3.27e-05	0.722581	C	G	0.0135076	0.00321557	2.66113e-05	C	G	0.0151641	0.00635545	0.01705	C	G	0.011	0.003	3.328e-05
2	16	rs889956	rs11679661	A	T	57308235	-4.239	2.24e-05	0.74136	A	T	-0.0134477	0.00320261	2.68104e-05	A	T	-0.0148853	0.00632879	0.01867	A	T	-0.011	0.003	2.808e-05
2	16	rs889956	rs1834183	T	C	57314264	4.2	2.67e-05	0.738061	T	C	0.0137347	0.00303573	6.05838e-06	T	C	0.0161254	0.00524234	0.0021	T	C	0.011	0.003	1.284e-05
2	16	rs889956	rs1424639	T	C	57314322	-4.128	3.66e-05	0.753929	T	C	-0.0132486	0.00320153	3.50004e-05	T	C	-0.0154957	0.00632994	0.01435	T	C	-0.011	0.003	2.194e-05
2	16	rs889956	rs12998956	A	G	57315202	-4.257	2.07e-05	0.735223	A	G	-0.0133059	0.00319322	3.08742e-05	A	G	-0.0149394	0.00631152	0.01792	A	G	-0.011	0.003	1.866e-05
2	16	rs889956	rs13014530	A	G	57317846	-4.07	4.69e-05	0.718564	A	G	-0.0138324	0.0030896	7.56664e-06	A	G	-0.0174772	0.00546676	0.00139	A	G	-0.01	0.003	6.517e-05
2	16	rs889956	rs34299282	A	G	57324679	-4.034	5.49e-05	0.726153	A	G	-0.0136182	0.00321285	2.24856e-05	A	G	-0.0154141	0.00637208	0.01556	A	G	-0.011	0.003	3.47e-05
2	16	rs889956	rs34722958	A	G	57324977	-4.201	2.65e-05	0.740704	A	G	-0.0138546	0.00322369	1.72546e-05	A	G	-0.0159617	0.00637449	0.01227	A	G	-0.011	0.003	3.934e-05
2	16	rs889956	rs35043826	T	C	57328928	4.381	1.18e-05	0.780505	T	C	0.0137963	0.00318821	1.5096e-05	T	C	0.0155286	0.00630218	0.01374	T	C	0.011	0.003	7.487e-06
2	16	rs889956	rs1579346	A	G	57329345	4.307	1.65e-05	0.780813	A	G	0.0146513	0.00303182	1.34823e-06	A	G	0.0166439	0.00523721	0.001484	A	G	0.012	0.003	5.903e-06
2	16	rs889956	rs1559556	A	G	57332617	4.459	8.23e-06	0.784409	A	G	0.015	0.00303125	7.4807e-07	A	G	0.0170591	0.00523768	0.001125	A	G	0.012	0.003	4.877e-06
2	16	rs889956	rs11125693	T	C	57334041	-4.328	1.5e-05	0.757936	T	C	-0.0137104	0.00320461	1.883e-05	T	C	-0.0158947	0.00633508	0.01211	T	C	-0.011	0.003	1.414e-05
2	16	rs889956	rs1345942	T	C	57335044	4.323	1.54e-05	0.761741	T	C	0.0141891	0.0030209	2.64055e-06	T	C	0.0162749	0.00523477	0.00188	T	C	0.011	0.003	7.263e-06
2	16	rs889956	rs6746111	C	G	57337419	4.23	2.33e-05	0.722291	C	G	0.0137716	0.00321828	1.87588e-05	C	G	0.0157193	0.00636151	0.01349	C	G	0.011	0.003	1.984e-05
2	16	rs889956	rs6746218	T	C	57337487	-4.102	4.09e-05	0.736432	T	C	-0.0146547	0.00309673	2.21984e-06	T	C	-0.0181382	0.00548149	0.0009371	T	C	-0.011	0.003	2.192e-05
2	16	rs889956	rs7557284	A	G	57341448	-4.421	9.81e-06	0.749938	A	G	-0.0146389	0.00304432	1.51982e-06	A	G	-0.0169467	0.00525969	0.001273	A	G	-0.011	0.003	1.032e-05
2	16	rs889956	rs34140847	T	C	57344193	-4.383	1.17e-05	0.764004	T	C	-0.0142024	0.00320638	9.44916e-06	T	C	-0.0159709	0.00633767	0.01174	T	C	-0.011	0.003	1.098e-05
2	16	rs889956	rs2859970	T	C	57344785	4.51	6.48e-06	0.784175	T	C	0.0145743	0.0031106	2.79462e-06	T	C	0.0160256	0.0057112	0.005014	T	C	0.012	0.003	5.063e-06
2	16	rs889956	rs1424646	T	G	57345571	4.551	5.34e-06	0.783798	T	G	0.0150403	0.00303309	7.09467e-07	T	G	0.0173243	0.00523869	0.0009422	T	G	0.012	0.003	4.712e-06
2	16	rs889956	rs13014038	A	C	57347944	4.476	7.61e-06	0.794424	A	C	0.0143757	0.00319096	6.63284e-06	A	C	0.0159975	0.00631064	0.01125	A	C	0.012	0.003	3.331e-06
2	16	rs889956	rs13019473	T	C	57348260	-4.466	7.98e-06	0.789923	T	C	-0.0151605	0.00303576	5.91514e-07	T	C	-0.018115	0.00524465	0.000552	T	C	-0.012	0.003	4.192e-06
2	16	rs889956	rs2059387	T	G	57352315	NA	NA	0.793066	T	G	-0.019127	0.0046015	3.22899e-05	T	G	-0.0162791	0.0063073	0.009848	T	G	-0.012	0.003	3.371e-06
2	16	rs889956	rs17188812	A	G	57354454	4.333	1.47e-05	0.793066	A	G	0.0151294	0.0030337	6.12925e-07	A	G	0.0181392	0.00524102	0.0005375	A	G	0.012	0.003	3.923e-06
2	16	rs889956	rs11688471	A	T	57354970	-4.381	1.18e-05	0.793066	A	T	-0.0144473	0.00318952	5.90902e-06	A	T	-0.0161744	0.00630334	0.01029	A	T	-0.012	0.003	3.934e-06
2	16	rs889956	rs1593235	A	G	57355662	4.358	1.31e-05	0.793066	A	G	0.0148749	0.00316906	2.68209e-06	A	G	0.0185115	0.00612558	0.002512	A	G	0.012	0.003	4.795e-06
2	16	rs889956	rs34139783	A	G	57356774	4.493	7.01e-06	0.793066	A	G	0.0145898	0.00318889	4.75775e-06	A	G	0.0165474	0.00630375	0.008677	A	G	0.012	0.003	2.976e-06
2	16	rs889956	rs13004185	A	G	57358730	-4.416	1.01e-05	0.793066	A	G	-0.0143693	0.00319193	6.7391e-06	A	G	-0.0161408	0.00630745	0.0105	A	G	-0.012	0.003	2.887e-06
2	16	rs889956	rs13010853	A	G	57359683	4.481	7.43e-06	0.797551	A	G	0.0144863	0.003191	5.63218e-06	A	G	0.0161382	0.00630644	0.01049	A	G	0.012	0.003	2.329e-06
2	16	rs889956	rs11888958	A	G	57359981	4.452	8.52e-06	0.797551	A	G	0.0143691	0.00319067	6.68577e-06	A	G	0.0161252	0.00630631	0.01055	A	G	0.012	0.003	2.422e-06
2	16	rs889956	rs55966827	A	G	57360853	-4.324	1.54e-05	0.782435	A	G	-0.0142523	0.00318264	7.52983e-06	A	G	-0.0158661	0.00630608	0.01187	A	G	-0.012	0.003	3.882e-06
2	16	rs889956	rs58641950	A	T	57361469	-4.683	2.83e-06	0.758406	A	T	-0.0145818	0.00318244	4.60665e-06	A	T	-0.0150228	0.00629887	0.01708	A	T	-0.012	0.003	4.138e-06
2	16	rs889956	rs13025563	A	C	57361983	-4.383	1.17e-05	0.797551	A	C	-0.0143146	0.00319174	7.29529e-06	A	C	-0.0163646	0.0063062	0.009448	A	C	-0.012	0.003	2.944e-06
2	16	rs889956	rs11125695	T	C	57362389	-4.431	9.38e-06	0.793919	T	C	-0.0148434	0.00303596	1.01251e-06	T	C	-0.0175027	0.00524346	0.0008435	T	C	-0.012	0.003	4.235e-06
2	16	rs889956	rs17796910	A	T	57362756	4.403	1.07e-05	0.797551	A	T	0.0143599	0.00319163	6.81986e-06	A	T	0.0164168	0.00630932	0.009273	A	T	0.012	0.003	3.454e-06
2	16	rs889956	rs17796928	A	G	57362978	-4.444	8.83e-06	0.797551	A	G	-0.0145564	0.00311244	2.91318e-06	A	G	-0.0167816	0.00571774	0.00333	A	G	-0.012	0.003	3.093e-06
2	16	rs889956	rs17189185	A	C	57364860	-4.384	1.16e-05	0.797551	A	C	-0.0148474	0.00303358	9.86344e-07	A	C	-0.0172923	0.0052401	0.0009683	A	C	-0.012	0.003	3.262e-06
2	16	rs889956	rs62158434	A	T	57365305	4.416	1e-05	0.797551	A	T	0.0143155	0.00319255	7.32422e-06	A	T	0.0162741	0.00631267	0.009933	A	T	0.012	0.003	2.773e-06
2	16	rs889956	rs66540826	A	T	57365416	4.366	1.27e-05	0.797551	A	T	0.0143088	0.00319224	7.38241e-06	A	T	0.0162367	0.00630553	0.01002	A	T	0.012	0.003	3.592e-06
2	16	rs889956	rs17189361	T	G	57366620	4.444	8.84e-06	0.797551	T	G	0.0149641	0.00303505	8.205e-07	T	G	0.0178873	0.00524247	0.0006449	T	G	0.012	0.003	3.776e-06
2	16	rs889956	rs11694571	C	G	57367438	4.48	7.47e-06	0.794424	C	G	0.0145793	0.00311168	2.79462e-06	C	G	0.0166324	0.00571362	0.003604	C	G	0.012	0.003	3.267e-06
2	16	rs889956	rs35068051	A	G	57367644	4.484	7.34e-06	0.794424	A	G	0.0144705	0.00318989	5.72305e-06	A	G	0.0165309	0.00629989	0.008696	A	G	0.012	0.003	3.329e-06
2	16	rs889956	rs35180076	T	G	57367798	4.505	6.64e-06	0.794424	T	G	0.0144035	0.00318995	6.3236e-06	T	G	0.016347	0.00630184	0.009479	T	G	0.012	0.003	3.1e-06
2	16	rs889956	rs1424647	T	G	57369920	-4.335	1.46e-05	0.749138	T	G	-0.0144515	0.00305611	2.25916e-06	T	G	-0.0173511	0.0052787	0.001014	T	G	-0.011	0.003	2.559e-05
2	16	rs889956	rs1424649	T	C	57370124	4.321	1.55e-05	0.753188	T	C	0.0144119	0.00305772	2.43757e-06	T	C	0.0172961	0.00527802	0.001048	T	C	0.011	0.003	2.033e-05
2	16	rs889956	rs1582644	T	C	57374265	-5.131	2.88e-07	0.866111	T	C	-0.016428	0.00306437	8.27689e-08	T	C	-0.0171472	0.00562204	0.00229	T	C	-0.011	0.003	1.755e-05
2	16	rs889956	rs1834186	A	T	57375039	5.203	1.96e-07	0.915881	A	T	0.0169594	0.00312707	5.84663e-08	A	T	0.0180763	0.0061757	0.00342	A	T	0.012	0.003	2.916e-06
2	16	rs889956	rs11125696	A	C	57375605	5.165	2.41e-07	0.907815	A	C	0.0170117	0.00312601	5.26864e-08	A	C	0.0179136	0.00617497	0.00372	A	C	0.012	0.003	4.22e-06
2	16	rs889956	rs6729063	A	G	57382953	-5.297	1.18e-07	0.915881	A	G	-0.0167238	0.00304852	4.1143e-08	A	G	-0.0162752	0.0055967	0.003637	A	G	-0.012	0.003	2.396e-06
2	16	rs889956	rs6729156	A	G	57383028	-5.298	1.17e-07	0.915881	A	G	-0.0167155	0.00304843	4.17419e-08	A	G	-0.016247	0.00559664	0.003701	A	G	-0.012	0.003	2.561e-06
2	16	rs889956	rs6732134	A	G	57383073	-5.294	1.2e-07	0.873992	A	G	-0.0163882	0.00306278	8.75823e-08	A	G	-0.0163934	0.00562188	0.003544	A	G	-0.011	0.003	1.667e-05
2	16	rs889956	rs3948495	T	G	57383133	-5.298	1.17e-07	0.915881	T	G	-0.0169987	0.00312556	5.36944e-08	T	G	-0.0172813	0.00617409	0.005121	T	G	-0.012	0.003	2.38e-06
2	16	rs889956	rs11680638	T	G	57384875	5.33	9.82e-08	0.923983	T	G	0.016716	0.00304852	4.17419e-08	T	G	0.0164245	0.00559797	0.003347	T	G	0.012	0.003	1.664e-06
2	16	rs889956	rs11690172	A	G	57387094	5.259	1.45e-07	0.923291	A	G	0.0167033	0.00305046	4.35897e-08	A	G	0.0166525	0.00560126	0.002944	A	G	0.012	0.003	1.442e-06
2	16	rs889956	rs966115	T	G	57387855	-5.321	1.03e-07	0.987175	T	G	-0.0172019	0.00299348	9.11374e-09	T	G	-0.0180257	0.00516939	0.0004877	T	G	-0.011	0.003	7.133e-06
2	16	rs889956	rs1540395	T	C	57389716	5.287	1.24e-07	0.983102	T	C	0.0170815	0.00299221	1.13869e-08	T	C	0.0177856	0.00516723	0.0005765	T	C	0.011	0.003	8.92e-06
2	16	rs889956	rs34674005	A	G	57390151	-5.295	1.19e-07	0.991483	A	G	-0.0171825	0.00314798	4.80818e-08	A	G	-0.0185859	0.00621811	0.002795	A	G	-0.011	0.003	8.726e-06
2	16	rs889956	rs6734341	T	C	57390456	5.262	1.43e-07	0.987257	T	C	0.0170277	0.00299223	1.26575e-08	T	C	0.017662	0.00516734	0.0006318	T	C	0.011	0.003	8.584e-06
2	16	rs889956	rs6734564	T	C	57390648	5.264	1.41e-07	0.987257	T	C	0.016795	0.00306896	4.43614e-08	T	C	0.0169146	0.00563443	0.00268	T	C	0.011	0.003	9.989e-06
2	16	rs889956	rs17798206	T	G	57391145	5.253	1.5e-07	0.982976	T	G	0.0170014	0.00299258	1.3377e-08	T	G	0.017558	0.00516717	0.000679	T	G	0.011	0.003	1.275e-05
2	16	rs889956	rs17190884	A	G	57395905	-5.267	1.38e-07	0.987282	A	G	-0.0167399	0.00307082	5.00152e-08	A	G	-0.0173681	0.00563717	0.002065	A	G	-0.011	0.003	1.086e-05
2	16	rs889956	rs17798624	A	T	57395966	5.24	1.61e-07	0.983073	A	T	0.016702	0.00306964	5.29713e-08	A	T	0.0171522	0.00563476	0.002333	A	T	0.011	0.003	1.026e-05
2	16	rs889956	rs11900101	T	C	57396482	5.19	2.1e-07	0.982963	T	C	0.0165496	0.00307143	7.1152e-08	T	C	0.0167511	0.0056382	0.002965	T	C	0.011	0.003	1.331e-05
2	16	rs889956	rs12994798	C	G	57397464	-5.234	1.66e-07	0.983118	C	G	-0.0165927	0.00307166	6.59522e-08	C	G	-0.0168169	0.00563757	0.00285	C	G	-0.011	0.003	9.278e-06
2	16	rs889956	rs727280	T	C	57397839	-5.281	1.29e-07	0.987282	T	C	-0.0170718	0.00314864	5.8946e-08	T	C	-0.0186444	0.00621894	0.002716	T	C	-0.011	0.003	1.362e-05
2	16	rs889956	rs1593228	A	G	57400136	5.25	1.52e-07	0.946259	A	G	0.0173572	0.003133	3.02245e-08	A	G	0.0203499	0.00618725	0.001004	A	G	0.011	0.003	1.263e-05
2	16	rs889956	rs35471249	A	C	57402025	5.401	6.64e-08	1	A	C	0.0175846	0.00314482	2.24966e-08	A	C	0.0202747	0.00621161	0.001097	A	C	0.011	0.003	6.913e-06
2	16	rs889956	rs984362	A	G	57402954	-5.407	6.41e-08	1	A	G	-0.0172138	0.00306721	1.99759e-08	A	G	-0.0186063	0.00563145	0.0009546	A	G	-0.011	0.003	6.757e-06
2	16	rs889956	rs984363	A	G	57403044	-5.394	6.88e-08	1	A	G	-0.0173074	0.00306714	1.67241e-08	A	G	-0.0189271	0.0056314	0.0007765	A	G	-0.011	0.003	8.052e-06
2	16	rs889956	rs889956	A	G	57404834	-5.452	4.97e-08	1	A	G	-0.0173758	0.00299112	6.27936e-09	A	G	-0.0190882	0.00516455	0.0002187	A	G	-0.011	0.003	7.076e-06
2	16	rs889956	rs1424636	A	G	57405979	-5.41	6.32e-08	0.995739	A	G	-0.017428	0.00299081	5.63725e-09	A	G	-0.0191346	0.00516454	0.0002118	A	G	-0.011	0.003	6.628e-06
[truncated: 20,379 more rows]
