# Supplementary material for: Study of 300,486 individuals identifies 148 independent genetic loci influencing general cognitive function
Source: Nat Commun. 2018 May 29;9:2098. doi: 10.1038/s41467-018-04362-x (PMC5974083; doi:10.1038/s41467-018-04362-x)
Supplement: Supplementary file 7 — Supplementary Data 4 [file 41467_2018_4362_MOESM7_ESM.xlsx]

## Sheet: Sheet1
Supplementary Data 4. Independent significant SNPs and SNPs tagged within each identified genomic locus for general cognitive function. Nearest gene was defined based on ANNOVAR annotations showing the most deleterious annotation for each of the tagged SNPs. The functional consequence of genetic variation in each SNP was also defined using ANNOVAR. CADD scores describe how deleterious this geneti…
Chromosome	Genomic Locus	Independent significant SNP	Tagged SNP	Effect Allele	Non-effect Allele	bp position tagged SNP	MAF tagged SNP	P tagged SNP	Z-score tagged SNP	LD between tagged SNP and independent significant SNP (r2)	Nearest Gene	Distance to nearest gene	Functional consequence of tagged SNP on closest gene	CADD score	RDB score	minChrState	eqtl (1=yes, 0=no)
1	1	rs79582714	rs11588952	T	C	20771987	0.09344	3.666e-08	-5.506	0.690118	LINC01141	14260	intergenic	1.22	5	5	1
1	1	rs79582714	rs112322975	T	C	20775499	0.09443	7.042e-10	6.165	0.846821	LINC01141	17772	intergenic	12.05	5	2	1
1	1	rs79582714	rs74335351	A	G	20777021	0.09642	8.032e-10	6.144	0.868709	LINC01141	19294	intergenic	7.002	7	5	1
1	1	rs79582714	rs371631131	C	T	20780762	0.09344	NA	NA	0.835956	LINC01141	23035	intergenic	2.214	6	1	0
1	1	rs79582714	rs374619151	C	G	20780763	0.09344	NA	NA	0.835956	LINC01141	23036	intergenic	0.418	6	1	0
1	1	rs79582714	rs111068868	T	C	20780766	0.08648	NA	NA	0.75642	LINC01141	23039	intergenic	4.132	6	1	0
1	1	rs79582714	rs112662287	T	C	20786824	0.09642	5.867e-10	-6.194	0.868709	CAMK2N1	22060	intergenic	17.59	7	5	1
1	1	rs79582714	rs77167727	T	C	20790806	0.09642	8.969e-10	6.127	0.868709	CAMK2N1	18078	intergenic	11.36	5	5	1
1	1	rs79582714	rs112660177	T	G	20796219	0.09642	8.063e-10	-6.144	0.868709	CAMK2N1	12665	intergenic	0.685	4	5	1
1	1	rs79582714	rs74335325	A	G	20800758	0.08847	3.144e-09	5.924	0.845533	CAMK2N1	8126	intergenic	1.598	5	5	1
1	1	rs79582714	rs75810319	T	G	20807073	0.1014	4.571e-10	6.233	0.882033	CAMK2N1	1811	intergenic	9.758	4	1	1
1	1	rs79582714	rs3767235	T	C	20811184	0.1113	3.617e-08	5.509	0.702768	CAMK2N1	0	intronic	19.11	4	1	1
1	1	rs10916805	rs56127503	T	C	20814444	0.165	1.287e-09	-6.069	1	CAMK2N1	1731	intergenic	5.916	5	5	1
1	1	rs10916805	rs56100950	A	G	20816766	0.165	1.392e-09	6.056	1	CAMK2N1	4053	intergenic	5.862	5	5	1
1	1	rs10916805	rs12085103	T	C	20817385	0.165	9.33e-10	6.12	1	CAMK2N1	4672	intergenic	0.634	7	5	1
1	1	rs10916805	rs10916805	C	G	20818659	0.165	8.01e-10	6.145	1	CAMK2N1	5946	intergenic	0.166	5	5	1
1	1	rs79582714	rs77645371	A	G	20818683	0.09145	9.961e-10	6.11	0.878017	CAMK2N1	5970	intergenic	3.413	6	5	1
1	1	rs79582714	rs77855246	A	C	20819606	0.1133	6.12e-08	5.415	0.688219	MUL1	6337	intergenic	5.865	6	5	1
1	1	rs10916805	rs76480145	A	C	20821180	0.16	2.719e-09	5.948	0.937635	MUL1	4763	intergenic	8.256	4	1	1
1	1	rs10916805	rs74720529	A	C	20821534	0.174	1.053e-09	-6.101	0.914883	MUL1	4409	intergenic	1.199	2b	2	1
1	1	rs10916805	rs12076947	A	G	20821965	0.175	1.039e-09	-6.103	0.921789	MUL1	3978	intergenic	3.946	5	2	1
1	1	rs10916805	rs6658554	A	G	20824366	0.16	2.223e-09	5.981	0.937635	MUL1	1577	intergenic	3.929	5	4	1
1	1	rs79582714	rs1044332	T	C	20826243	0.1163	1.042e-08	5.724	0.75619	MUL1	0	UTR3	5.285	NA	4	1
1	1	rs79582714	rs111270978	A	C	20829303	0.1163	2.65e-08	-5.563	0.75619	MUL1	0	intronic	2.658	6	4	1
1	1	rs79582714	rs17412284	A	G	20830127	0.1163	2.132e-08	5.601	0.75619	MUL1	0	intronic	2.639	7	4	1
1	1	rs10916805	rs80274432	T	C	20831301	0.173	1.591e-09	-6.035	0.921072	MUL1	0	intronic	2.128	7	1	1
1	1	rs79582714	rs76674902	A	G	20831675	0.1163	2.41e-08	5.58	0.75619	MUL1	0	intronic	1.177	6	4	1
1	1	rs10916805	rs12566937	T	G	20832674	0.173	1.639e-09	-6.03	0.921072	MUL1	0	intronic	7.025	5	1	1
1	1	rs10916805	rs6669244	T	C	20834789	0.173	2.172e-09	-5.984	0.921072	MUL1	0	upstream	6.652	4	1	1
1	1	rs10916805	rs79759487	A	C	20835407	0.173	1.837e-09	-6.012	0.921072	MUL1	0	upstream	0.339	5	1	1
1	1	rs10916805	rs17412396	T	C	20835492	0.173	2.028e-09	-5.996	0.921072	MUL1	0	upstream	0.25	7	1	1
1	1	rs79582714	rs111700084	A	G	20837080	0.1163	3.628e-08	5.508	0.75619	MUL1	2426	intergenic	0.132	6	5	1
1	1	rs10916805	rs12057500	C	G	20837289	0.173	1.907e-09	-6.006	0.921072	MUL1	2635	intergenic	3.699	7	5	1
1	1	rs10916805	rs17403898	A	C	20837541	0.173	2.308e-09	-5.975	0.921072	MUL1	2887	intergenic	0.821	6	5	1
1	1	rs79582714	rs111722163	T	C	20841953	0.1173	NA	NA	0.748737	MUL1	7299	intergenic	2.209	7	13	1
1	1	rs10916805	rs12094563	T	C	20844074	0.173	2.16e-09	-5.985	0.908015	RPS4XP4	8408	intergenic	0.444	6	5	1
1	1	rs79582714	rs112684754	C	G	20846625	0.1173	2.235e-08	5.593	0.767055	RPS4XP4	5857	intergenic	0.01	6	7	1
1	1	rs10916805	rs77280889	A	G	20850250	0.174	1.949e-09	-6.002	0.901883	RPS4XP4	2232	intergenic	0.276	6	5	1
1	1	rs10916805	rs7544348	T	C	20851834	0.1909	5.855e-09	-5.821	0.81113	RPS4XP4	0	upstream	0.816	7	5	1
1	1	rs10916805	rs7552144	A	G	20851931	0.174	1.913e-09	6.005	0.901883	RPS4XP4	0	upstream	1.977	5	5	1
1	1	rs10916805	rs7530736	T	C	20852207	0.174	1.883e-09	6.008	0.901883	RPS4XP4	0	upstream	1.555	7	5	1
1	1	rs79582714	rs77547636	A	G	20853036	0.1163	2.345e-08	5.584	0.774647	RPS4XP4	0	ncRNA_exonic	1.097	3a	5	1
1	1	rs10916805	rs10916807	A	G	20855188	0.1909	6.511e-09	-5.803	0.81113	RPS4XP4	1944	intergenic	11.77	7	5	1
1	1	rs10916805	rs10916808	T	C	20855542	0.1909	6.456e-09	-5.804	0.81113	RPS4XP4	2298	intergenic	1.955	7	5	1
1	1	rs10916805	rs10916809	T	C	20855879	0.1889	4.153e-09	5.878	0.831827	RPS4XP4	2635	intergenic	4.202	7	5	1
1	1	rs10916805	rs10916810	T	C	20856037	0.1909	7.439e-09	5.781	0.81113	RPS4XP4	2793	intergenic	12.31	7	5	1
1	1	rs10916805	rs11811983	T	C	20856845	0.1909	5.818e-09	-5.822	0.81113	RPS4XP4	3601	intergenic	2.087	4	5	1
1	1	rs10916805	rs6698887	A	G	20857064	0.175	1.398e-09	6.056	0.908753	RPS4XP4	3820	intergenic	3.751	4	7	1
1	1	rs10916805	rs6690792	A	T	20857361	0.175	1.278e-09	6.07	0.908753	RPS4XP4	4117	intergenic	5.442	4	7	1
1	1	rs10916805	rs77110732	A	G	20857643	0.175	9.519e-10	6.117	0.908753	RPS4XP4	4399	intergenic	5.179	3a	7	1
1	1	rs79582714	rs75492067	C	G	20860147	0.1143	1.437e-08	5.669	0.79019	RPS4XP4	6903	intergenic	0.388	3a	7	1
1	1	rs79582714	rs17404136	A	G	20861033	0.1143	1.774e-08	-5.633	0.79019	RPS4XP4	7789	intergenic	2.175	5	5	1
1	1	rs10916805	rs12070795	A	G	20863796	0.1918	3.299e-09	5.916	0.790598	RPS4XP4	10552	intergenic	0.04	6	5	1
1	1	rs79582714	rs112214119	G	A	20864743	0.1103	NA	NA	0.822798	RPS4XP4	11499	intergenic	0.097	5	5	1
1	1	rs79582714	rs113923880	G	A	20864746	0.1103	NA	NA	0.822798	RPS4XP4	11502	intergenic	4.503	4	5	1
1	1	rs12073420	rs12073420	T	G	20871181	0.1491	2.982e-10	6.3	1	FAM43B	7751	intergenic	8.878	7	5	1
1	1	rs79582714	rs111235962	T	C	20871750	0.09443	9.429e-10	6.119	0.977457	FAM43B	7182	intergenic	6.502	6	5	1
1	1	rs12073420	rs112456461	A	C	20873804	0.163	2.389e-09	5.969	0.901829	FAM43B	5128	intergenic	0.565	7	5	1
1	1	rs12073420	rs12074493	G	A	20875189	0.161	NA	NA	0.915029	FAM43B	3743	intergenic	2.076	NA	5	1
1	1	rs12073420	rs4610976	T	C	20875420	0.161	1.672e-09	-6.027	0.915029	FAM43B	3512	intergenic	10.22	6	5	1
1	1	rs79582714	rs4615814	T	C	20875459	0.09443	8.669e-10	-6.132	0.977457	FAM43B	3473	intergenic	3.216	7	5	1
1	1	rs79582714	rs74701752	T	G	20875676	0.09443	1.097e-09	6.095	0.977457	FAM43B	3256	intergenic	0.105	6	5	1
1	1	rs12073420	rs12075943	A	G	20876208	0.1799	1.447e-09	-6.05	0.808717	FAM43B	2724	intergenic	0.046	6	5	1
1	1	rs12073420	rs12069779	A	G	20877026	0.1869	2.09e-09	-5.991	0.765161	FAM43B	1906	intergenic	9.142	7	5	1
1	1	rs12073420	rs12072199	T	C	20877812	0.1879	1.77e-09	-6.018	0.760276	FAM43B	1120	intergenic	1.177	3a	2	1
1	1	rs12073420	rs10916812	A	C	20878201	0.1879	5.612e-10	-6.201	0.760276	FAM43B	0	upstream	1.906	5	1	1
1	1	rs12073420	rs6675648	A	G	20878692	0.1879	2.241e-09	-5.979	0.760276	FAM43B	0	upstream	0.108	4	1	1
1	1	rs12073420	rs111802442	A	G	20879156	0.1879	1.984e-09	-5.999	0.760276	FAM43B	0	UTR5	0.435	4	1	1
1	1	rs12073420	rs74058407	A	G	20880905	0.1879	2.266e-09	-5.977	0.760276	FAM43B	0	UTR3	3.477	4	1	1
1	1	rs12073420	rs3795509	A	T	20881309	0.1879	2.226e-09	5.98	0.760276	FAM43B	0	UTR3	6.08	5	2	1
1	1	rs12073420	rs10799637	T	C	20881754	0.1859	8.873e-10	-6.128	0.779996	FAM43B	0	downstream	0.497	5	5	1
1	1	rs79582714	rs6689263	A	G	20882523	0.1183	7.187e-10	-6.162	0.75958	FAM43B	1011	intergenic	5.592	4	2	1
1	1	rs79582714	rs6676960	T	C	20882712	0.1203	1.474e-09	6.047	0.730896	FAM43B	1200	intergenic	0.476	6	5	1
1	1	rs12073420	rs6691916	A	G	20882766	0.1869	1.746e-09	-6.02	0.762532	FAM43B	1254	intergenic	0.48	7	5	1
1	1	rs79582714	rs6702976	A	G	20882794	0.1203	1.383e-09	6.057	0.730896	FAM43B	1282	intergenic	0.53	5	5	1
1	1	rs79582714	rs60860959	T	C	20882864	0.1203	1.755e-09	6.019	0.730896	FAM43B	1352	intergenic	1.269	5	5	1
1	1	rs79582714	rs76440167	A	G	20883582	0.09642	2.979e-10	6.3	1	FAM43B	2070	intergenic	5.523	5	5	1
1	1	rs79582714	rs79582714	T	C	20883608	0.09642	2.61e-10	6.32	1	FAM43B	2096	intergenic	5.017	5	5	1
1	1	rs79582714	rs76992245	G	C	20914745	0.09245	NA	NA	0.825143	CDA	0	upstream	0.038	5	5	1
1	1	rs79582714	rs74056307	A	G	20956760	0.09344	2.55e-09	5.958	0.71508	PINK1	3188	intergenic	8.667	5	5	1
1	1	rs79582714	rs17414302	A	G	20976535	0.09046	4.301e-10	6.243	0.68108	PINK1-AS	0	ncRNA_exonic	2.755	3a	4	1
1	2	rs541507329	rs149515236	A	C	21458254	0.000994	NA	NA	1	EIF4G3	0	intronic	0.11	4	4	0
1	2	rs541507329	rs567942080	C	T	21486844	0.000994	NA	NA	1	EIF4G3	0	intronic	4.156	NA	4	0
1	2	rs541507329	rs183937814	G	C	21492033	0.000994	NA	NA	1	EIF4G3	0	intronic	13.33	6	4	0
1	2	rs541507329	rs571934003	T	C	22014125	0.000994	NA	NA	1	USP48	0	intronic	9.576	NA	3	0
1	2	rs541507329	rs150768594	A	G	22227282	0.000994	NA	NA	1	HSPG2	0	intronic	11.41	5	2	0
1	2	rs541507329	rs112059540	A	C	22288304	0.000994	NA	NA	1	CELA3B	15210	intergenic	6.369	3a	5	0
1	2	rs541507329	rs148478596	A	G	22288724	0.000994	NA	NA	1	CELA3B	14790	intergenic	2.878	5	2	0
1	2	rs541507329	rs532451110	A	G	22335505	0.000994	NA	NA	1	CELA3A	0	intronic	1.323	NA	5	0
1	2	rs541507329	rs555052093	C	T	22364924	0.000994	NA	NA	1	LINC00339	7208	intergenic	7.125	NA	2	0
1	2	rs541507329	rs541507329	A	G	22428398	0.000994	4.976e-08	5.452	1	ENSG00000271840	0	downstream	6.134	NA	4	0
1	2	rs541507329	rs534434838	A	G	22503006	0.000994	NA	NA	1	WNT4	32544	intergenic	3.375	NA	5	0
1	2	rs541507329	rs141887726	T	C	22595645	0.000994	NA	NA	1	MIR4418	2852	intergenic	0.585	3a	5	0
1	2	rs541507329	rs535958570	C	G	22764105	0.000994	NA	NA	1	ZBTB40	14239	intergenic	0.177	NA	5	0
1	2	rs541507329	rs555101454	T	C	23297870	0.000994	NA	NA	1	LACTBL1	6039	intergenic	12.1	NA	5	0
1	3	rs7518151	rs10914446	A	C	32054094	0.2932	2.608e-09	-5.955	0.978803	TINAGL1	0	downstream	1.206	5	1	1
1	3	rs7518151	rs10914447	A	G	32056510	0.2922	1.617e-09	-6.032	0.983968	TINAGL1	3222	intergenic	1.311	5	5	1
1	3	rs7518151	rs4949447	A	G	32057186	0.2992	3.818e-09	-5.892	0.948476	TINAGL1	3898	intergenic	12.8	2b	5	1
1	3	rs7518151	rs12065856	A	T	32059764	0.2922	1.246e-09	6.074	0.983968	TINAGL1	6476	intergenic	3.688	2b	5	1
1	3	rs7518151	rs12071060	G	T	32061031	0.4165	NA	NA	0.648789	TINAGL1	7743	intergenic	0.204	6	5	0
1	3	rs7518151	rs373355271	G	T	32061035	0.4145	NA	NA	0.653917	TINAGL1	7747	intergenic	0.217	6	5	0
1	3	rs7518151	rs146584509	G	T	32061039	0.4155	NA	NA	0.644383	TINAGL1	7751	intergenic	0.024	6	5	1
1	3	rs7518151	rs60500843	G	T	32061043	0.3976	NA	NA	0.689613	TINAGL1	7755	intergenic	0.272	6	5	1
1	3	rs7518151	rs201999313	G	T	32061051	0.3479	NA	NA	0.714085	TINAGL1	7763	intergenic	0.046	6	5	1
1	3	rs7518151	rs7518151	T	C	32061851	0.2913	1.026e-09	-6.105	1	TINAGL1	8563	intergenic	4.318	4	2	1
1	3	rs10914457	rs4949448	T	G	32062066	0.4801	2.314e-07	5.172	0.726727	TINAGL1	8778	intergenic	5.633	4	2	1
1	3	rs10798879	rs6682016	A	G	32064903	0.3539	5.172e-13	7.221	0.938494	TINAGL1	11615	intergenic	1.843	6	5	1
1	3	rs10914462	rs11581611	A	G	32065385	0.4364	8.516e-10	6.135	0.848489	TINAGL1	12097	intergenic	0.541	7	5	1
1	3	rs10914462	rs11579820	A	C	32065460	0.4364	5.498e-10	-6.204	0.848489	TINAGL1	12172	intergenic	0.582	7	5	1
1	3	rs10798879	rs12032260	T	A	32068570	0.4026	NA	NA	0.756668	HCRTR1	14731	intergenic	3.925	6	5	0
1	3	rs10798879	rs190639719	T	A	32068572	0.4026	NA	NA	0.756668	HCRTR1	14729	intergenic	1.916	6	5	0
1	3	rs10798879	rs7523616	T	C	32068677	0.3529	1.554e-13	-7.382	0.943262	HCRTR1	14624	intergenic	1.326	7	5	1
1	3	rs10914462	rs10914448	A	G	32068843	0.4354	2.111e-10	6.353	0.843864	HCRTR1	14458	intergenic	8.031	6	5	1
1	3	rs10914462	rs6681414	A	G	32070234	0.4354	2.592e-10	6.321	0.852438	HCRTR1	13067	intergenic	5.992	7	5	1
1	3	rs10914462	rs4949218	A	G	32070519	0.4354	2.35e-10	6.337	0.852438	HCRTR1	12782	intergenic	3.411	5	5	1
1	3	rs10798879	rs4949219	A	G	32070766	0.3519	2.052e-13	-7.345	0.947915	HCRTR1	12535	intergenic	0.404	7	5	1
1	3	rs10798879	rs6664789	C	G	32072406	0.3519	1.46e-13	-7.391	0.947915	HCRTR1	10895	intergenic	3.564	7	5	1
1	3	rs10798879	rs6680160	A	G	32072737	0.3519	1.859e-13	-7.359	0.947915	HCRTR1	10564	intergenic	0.073	6	5	1
1	3	rs10914462	rs7525618	T	C	32073766	0.4354	2.385e-10	6.334	0.852438	HCRTR1	9535	intergenic	0.783	7	5	1
1	3	rs10914462	rs10914451	A	G	32073908	0.4354	2.667e-10	6.317	0.852438	HCRTR1	9393	intergenic	4.865	7	5	1
1	3	rs10914462	rs10798876	C	G	32074514	0.4354	2.604e-10	-6.321	0.852438	HCRTR1	8787	intergenic	0.675	6	5	1
1	3	rs10914462	rs10914452	A	G	32074575	0.4354	2.461e-10	6.329	0.852438	HCRTR1	8726	intergenic	5.292	7	5	1
1	3	rs10798879	rs10798877	A	G	32074747	0.3529	1.847e-13	7.359	0.952658	HCRTR1	8554	intergenic	0.068	7	5	1
1	3	rs10798879	rs10914453	A	G	32075036	0.3519	1.29e-13	-7.407	0.957325	HCRTR1	8265	intergenic	2.553	5	5	1
1	3	rs10914462	rs2152110	C	G	32076144	0.4344	2.242e-10	-6.344	0.856403	HCRTR1	7157	intergenic	8.167	6	5	1
1	3	rs10798879	rs1464306	T	C	32076261	0.3519	1.526e-13	-7.385	0.957325	HCRTR1	7040	intergenic	1.977	7	5	1
1	3	rs10914462	rs10914454	A	G	32078940	0.4384	1.826e-10	6.375	0.850463	HCRTR1	4361	intergenic	5.343	5	5	1
1	3	rs10914462	rs3753614	A	G	32081785	0.4135	1.959e-09	6.001	0.751842	HCRTR1	1516	intergenic	5.581	NA	4	1
1	3	rs10914462	rs3753613	T	C	32082000	0.4384	5.452e-11	-6.558	0.850463	HCRTR1	1301	intergenic	1.656	NA	5	1
1	3	rs10914462	rs3753612	C	G	32082410	0.4394	4.88e-11	-6.575	0.854492	HCRTR1	0	upstream	1.708	5	5	1
1	3	rs10798879	rs3753611	T	C	32082486	0.3549	3.037e-14	7.597	0.953058	HCRTR1	0	upstream	4.737	NA	5	1
1	3	rs10914462	rs11589306	C	G	32082822	0.4354	4.316e-11	-6.593	0.861014	HCRTR1	0	upstream	6.431	4	2	1
1	3	rs10798879	rs11807225	C	G	32083193	0.3529	1.829e-14	7.662	0.962178	HCRTR1	0	upstream	4.246	2b	1	1
1	3	rs10914462	rs12740754	G	C	32083273	0.4354	NA	NA	0.861014	HCRTR1	0	upstream	22.2	4	1	1
1	3	rs10914462	rs1056526	T	C	32084904	0.4364	3.865e-11	6.609	0.865066	HCRTR1	0	exonic	16.63	5	5	1
1	3	rs10798879	rs11575883	A	G	32085485	0.3688	6.207e-13	7.196	0.894024	HCRTR1	0	intronic	0.539	5	5	1
1	3	rs10914462	rs968335	A	G	32085776	0.4354	2.676e-11	6.663	0.861014	HCRTR1	0	intronic	4.637	5	5	1
1	3	rs10798879	rs10753257	A	G	32086089	0.3678	5.901e-13	7.203	0.889386	HCRTR1	0	intronic	2.335	5	5	1
1	3	rs10798879	rs2280386	A	C	32086912	0.3529	2.605e-14	-7.617	0.962178	HCRTR1	0	intronic	2.573	5	5	1
1	3	rs10798879	rs10914456	T	C	32088171	0.3638	3.34e-13	-7.28	0.914906	HCRTR1	0	intronic	2.059	5	5	1
1	3	rs10798879	rs4949449	T	G	32088534	0.3638	2.308e-13	-7.33	0.905415	HCRTR1	0	intronic	9.405	7	5	1
1	3	rs10798879	rs4949450	A	T	32088675	0.3479	1.148e-14	7.722	0.98573	HCRTR1	0	intronic	4.766	6	5	1
1	3	rs10798879	rs4949451	A	G	32088913	0.3648	NA	NA	0.910576	HCRTR1	0	intronic	0.6	6	5	0
1	3	rs10914462	rs3134718	T	C	32089839	0.4364	2.531e-11	6.672	0.865066	HCRTR1	0	intronic	2.157	7	4	1
1	3	rs10798879	rs6663012	T	G	32091779	0.3628	1.626e-13	-7.376	0.919256	HCRTR1	0	intronic	7.38	5	1	1
1	3	rs10798879	rs2271933	A	G	32092525	0.3668	4.185e-13	-7.249	0.902526	HCRTR1	0	exonic	1.92	NA	2	1
1	3	rs10914462	rs2176807	T	G	32092735	0.4344	1.977e-11	-6.708	0.86498	HCRTR1	0	UTR3	2.092	NA	2	1
1	3	rs10798879	rs871634	C	G	32093167	0.3499	1.241e-14	7.712	0.976246	HCRTR1	0	intronic	12.12	4	2	1
1	3	rs10914462	rs6703093	T	C	32093561	0.4394	2.401e-11	6.679	0.854492	HCRTR1	0	intronic	5.918	4	2	1
1	3	rs10914457	rs10914457	A	C	32094261	0.4364	1.526e-08	5.659	1	HCRTR1	0	intronic	14	5	2	1
1	3	rs10914462	rs1061770	A	G	32096265	0.4324	1.629e-11	-6.736	0.889568	PEF1	0	exonic	7.63	NA	4	1
1	3	rs10798879	rs10914458	T	C	32096746	0.3648	1.643e-13	-7.375	0.929556	PEF1:HCRTR1	0	intronic:intronic	5.678	5	4	1
1	3	rs10798879	rs10798879	T	C	32096815	0.3489	6.363e-15	-7.797	1	HCRTR1:PEF1	0	intronic:intronic	9.101	5	3	1
1	3	rs10914462	rs10914459	T	C	32096918	0.4334	1.479e-11	-6.75	0.893625	PEF1:HCRTR1	0	intronic:intronic	14.11	7	3	1
1	3	rs10798879	rs10798880	T	G	32097088	0.3539	1.61e-14	7.678	0.976572	PEF1:HCRTR1	0	intronic:intronic	7.251	7	3	1
1	3	rs10914462	rs4949454	A	G	32099041	0.4334	1.564e-11	6.742	0.885564	PEF1	0	intronic	3.543	4	4	1
1	3	rs10798879	rs10798881	C	G	32101775	0.3499	6.614e-15	7.792	0.995251	PEF1	0	intronic	0.596	5	4	1
1	3	rs10914462	rs7529064	A	C	32105192	0.4374	2.986e-11	6.647	0.870279	PEF1	0	intronic	6.748	4	2	1
1	3	rs10798879	rs6425777	C	G	32105447	0.3648	2.847e-13	7.301	0.929556	PEF1	0	intronic	1.194	4	2	1
1	3	rs10798879	rs7546297	A	G	32106494	0.3489	6.513e-15	-7.794	1	PEF1	0	intronic	2.931	5	4	1
1	3	rs10798879	rs6699558	T	C	32107622	0.3648	1.765e-13	-7.365	0.929556	PEF1	0	intronic	9.22	7	4	1
1	3	rs10798879	rs10798882	C	G	32108547	0.3559	9.696e-14	-7.445	0.948673	PEF1	0	intronic	3.469	6	1	1
1	3	rs10798879	rs7524405	A	C	32108579	0.3559	6.583e-14	7.496	0.948673	PEF1	0	intronic	6.629	6	1	1
1	3	rs10914462	rs7549590	A	G	32109849	0.4344	1.068e-11	6.797	0.905014	ENSG00000235790	0	ncRNA_exonic	7.271	4	1	1
1	3	rs10914462	rs7542583	A	G	32110813	0.4334	2.085e-11	-6.7	0.900827	ENSG00000264078:ENSG00000235790	0	ncRNA_intronic:ncRNA_intronic	8.344	4	1	1
1	3	rs10914462	rs10914460	T	C	32113216	0.4384	NA	NA	0.889544	ENSG00000264078:ENSG00000235790	0	ncRNA_intronic:ncRNA_intronic	1.324	5	5	1
1	3	rs10914462	rs10914461	A	G	32113217	0.4394	1.962e-10	6.364	0.885615	ENSG00000235790:ENSG00000264078	0	ncRNA_intronic:ncRNA_intronic	0.738	5	5	1
1	3	rs10798879	rs4949455	A	G	32114793	0.3569	4.934e-14	7.534	0.934863	ENSG00000264078	0	ncRNA_exonic	6.912	7	5	1
1	3	rs10914462	rs2139539	T	C	32117779	0.4334	1.884e-11	6.715	0.900827	ENSG00000235790	0	ncRNA_exonic	5.731	5	4	1
1	3	rs10798879	rs1061392	C	A	32118160	0.3748	NA	NA	0.84511	ENSG00000235790	0	ncRNA_intronic	10.05	NA	4	1
1	3	rs10914462	rs3817398	T	C	32119431	0.4344	2.2e-11	-6.692	0.905014	ENSG00000235790	0	ncRNA_intronic	4.881	4	4	1
1	3	rs10798879	rs7545321	A	G	32122164	0.3598	5.856e-14	-7.511	0.893989	ENSG00000235790	0	ncRNA_intronic	4.389	5	4	1
1	3	rs10914462	rs56074668	T	C	32123801	0.4364	2.927e-10	-6.303	0.890278	ENSG00000235790	0	ncRNA_intronic	13.57	2b	2	1
1	3	rs10914462	rs10914462	A	G	32125943	0.4195	4.935e-11	6.573	1	COL16A1	0	intronic	8.253	5	4	1
1	3	rs10914462	rs2271927	T	C	32127911	0.4016	3.079e-12	-6.974	0.926221	COL16A1	0	intronic	5.174	5	4	1
1	3	rs10914462	rs2271928	A	G	32127953	0.4016	3.315e-12	-6.964	0.926221	COL16A1	0	exonic	8.853	5	4	1
1	3	rs10914462	rs1568396	G	C	32128283	0.4563	NA	NA	0.803343	COL16A1	0	intronic	0.635	5	4	1
1	3	rs10914462	rs12032291	A	G	32129041	0.4026	3.84e-12	6.943	0.921415	COL16A1	0	intronic	3.107	5	4	1
1	3	rs10914462	rs1356803	C	G	32131163	0.4423	8.915e-10	-6.128	0.875968	COL16A1	0	intronic	4.798	5	4	1
1	3	rs10798879	rs10914463	T	C	32132063	0.3946	3.661e-10	6.268	0.758784	COL16A1	0	intronic	7.274	2b	2	1
1	3	rs10798879	rs2292988	T	C	32133737	0.337	3.657e-14	-7.573	0.853605	COL16A1	0	intronic	6.418	5	3	1
1	3	rs10798879	rs7512805	T	C	32134763	0.3827	4.521e-12	6.92	0.825453	COL16A1	0	intronic	5.245	2c	4	1
1	3	rs10798879	rs6425778	A	T	32135022	0.3688	5.541e-13	7.211	0.805253	COL16A1	0	intronic	7.126	4	2	1
1	3	rs10798879	rs7537646	A	G	32135495	0.4026	1.55e-09	6.039	0.714719	COL16A1	0	intronic	8.576	4	2	1
1	3	rs10798879	rs2292989	A	G	32135773	0.336	3.057e-14	7.596	0.840684	COL16A1	0	intronic	13.51	4	1	1
1	3	rs10798879	rs1474182	A	G	32136398	0.4046	6.448e-10	6.179	0.732473	COL16A1	0	intronic	14.03	5	1	1
1	3	rs10798879	rs1474181	C	G	32136610	0.4145	9.881e-10	-6.111	0.680234	COL16A1	0	intronic	5.169	5	2	1
1	3	rs10798879	rs909002	T	C	32139635	0.4165	7.719e-10	6.151	0.682771	COL16A1	0	intronic	8.33	7	2	1
1	3	rs10798879	rs4949456	A	G	32140039	0.3489	2.221e-13	-7.335	0.795916	COL16A1	0	intronic	7.128	5	2	1
1	3	rs10798879	rs4949457	T	C	32140053	0.337	9.539e-15	-7.745	0.820072	COL16A1	0	intronic	6.797	5	2	1
1	3	rs10798879	rs10798883	T	C	32140305	0.4165	6.712e-10	6.173	0.682771	COL16A1	0	intronic	4.311	4	2	1
1	3	rs10798879	rs2292993	T	C	32140733	0.4155	8.065e-10	6.144	0.686047	COL16A1	0	intronic	11.36	5	2	1
1	3	rs4949460	rs4949458	T	G	32142332	0.4503	2.954e-07	-5.126	0.847977	COL16A1	0	intronic	18.06	5	4	1
1	3	rs4949460	rs4949459	T	G	32142354	0.4543	2.731e-07	5.141	0.865816	COL16A1	0	intronic	14.66	5	4	1
1	3	rs4949460	rs4949460	A	G	32143138	0.4215	6.525e-09	5.803	1	COL16A1	0	intronic	2.721	4	4	1
1	4	rs12025777	rs35080169	A	G	41454959	0.1103	1.976e-06	-4.756	0.629953	CTPS1	0	intronic	9.546	5	2	1
1	4	rs12025777	rs12743340	A	G	41456032	0.1103	2.488e-06	4.709	0.629953	CTPS1	0	intronic	3.815	5	2	1
1	4	rs12025777	rs34502739	A	G	41459146	0.1103	2e-06	4.753	0.629953	CTPS1	0	intronic	0.066	5	4	1
1	4	rs12025777	rs67450703	A	G	41460129	0.1103	2.054e-06	4.748	0.629953	CTPS1	0	intronic	5.356	6	4	1
1	4	rs12025777	rs13376450	A	G	41469043	0.1103	2.573e-06	4.702	0.629953	CTPS1	0	intronic	5.864	4	2	1
1	4	rs12025777	rs67460888	T	C	41469337	0.1103	1.617e-06	4.796	0.629953	CTPS1	0	intronic	2.632	4	2	1
1	4	rs12025777	rs12023079	A	G	41470111	0.1103	1.595e-06	-4.799	0.629953	CTPS1	0	intronic	5.183	2b	4	1
1	4	rs12025777	rs36084778	A	G	41479538	0.1113	1.427e-06	4.821	0.642406	CTPS1	1303	intergenic	2.085	4	4	1
1	4	rs12025777	rs11209363	T	C	41485077	0.1113	2.076e-06	4.746	0.642406	SLFNL1	0	intronic	2.435	2b	4	1
1	4	rs12025777	rs12031277	A	G	41491801	0.1083	8.344e-06	4.456	0.605305	SCMH1	1071	intergenic	0.876	4	4	1
1	4	rs12025777	rs16911	T	C	41498021	0.1113	1.703e-06	-4.786	0.642406	SCMH1	0	intronic	1.653	NA	4	1
1	4	rs12025777	rs2281509	C	T	41500009	0.1123	NA	NA	0.635548	SCMH1	0	intronic	0.323	NA	4	1
1	4	rs12025777	rs2300658	A	G	41505022	0.1123	1.81e-06	-4.774	0.635548	SCMH1	0	intronic	7.898	NA	4	1
1	4	rs12025777	rs2300655	A	G	41508141	0.1133	2.337e-06	-4.722	0.628804	SCMH1	0	intronic	12.53	NA	4	1
1	4	rs12025777	rs10489521	T	C	41508490	0.1123	1.701e-06	-4.786	0.635548	SCMH1	0	intronic	5.073	NA	4	1
1	4	rs12025777	rs12729448	A	G	41509834	0.1123	1.644e-06	-4.793	0.635548	SCMH1	0	intronic	5.824	4	2	1
1	4	rs12025777	rs2268678	A	G	41511053	0.1123	1.682e-06	-4.788	0.635548	SCMH1	0	intronic	7.813	NA	2	1
1	4	rs12025777	rs10489520	A	C	41511755	0.1123	1.684e-06	-4.788	0.635548	SCMH1	0	intronic	2.577	NA	2	1
1	4	rs12025777	rs12406620	A	T	41512664	0.1123	1.84e-06	4.77	0.635548	SCMH1	0	intronic	4.236	7	4	1
1	4	rs12025777	rs35444705	T	G	41515320	0.1123	1.749e-06	4.78	0.635548	SCMH1	0	intronic	9.551	6	4	1
1	4	rs12025777	rs35201793	A	G	41521922	0.09841	2.466e-05	-4.218	0.700527	SCMH1	0	intronic	1.118	7	4	1
1	4	rs12025777	rs12729586	A	C	41522377	0.1123	2.025e-06	-4.751	0.635548	SCMH1	0	intronic	0.392	5	4	1
1	4	rs12025777	rs34486565	T	C	41522510	0.1123	2.009e-06	-4.753	0.635548	SCMH1	0	intronic	3.316	5	4	1
1	4	rs12025777	rs12742379	A	G	41526381	0.1123	2.026e-06	4.751	0.635548	SCMH1	0	intronic	5.467	7	4	1
1	4	rs12025777	rs12722762	T	C	41526426	0.1123	2.102e-06	-4.743	0.635548	SCMH1	0	intronic	3.568	7	4	1
1	4	rs12025777	rs12044302	C	G	41528389	0.1123	2.147e-06	-4.739	0.635548	SCMH1	0	intronic	0.805	7	4	1
1	4	rs12025777	rs12045171	A	G	41528805	0.1123	2.35e-06	-4.721	0.635548	SCMH1	0	intronic	0.129	5	4	1
1	4	rs12025777	rs12046059	A	T	41533012	0.1123	1.977e-06	4.756	0.635548	SCMH1	0	intronic	1.846	6	4	1
1	4	rs12025777	rs16827876	T	G	41539536	0.1123	2.409e-06	4.716	0.635548	SCMH1	0	intronic	1.453	6	4	1
1	4	rs12025777	rs12023623	A	G	41540636	0.1133	1.964e-06	-4.757	0.634563	SCMH1	0	intronic	0.371	7	4	1
1	4	rs12025777	rs34979067	A	G	41543084	0.1123	2.058e-06	-4.748	0.635548	SCMH1	0	intronic	2.086	7	4	1
1	4	rs12025777	rs35190461	T	C	41543135	0.1123	2.152e-06	4.739	0.635548	SCMH1	0	intronic	10.5	6	4	1
1	4	rs12025777	rs35147684	T	C	41548385	0.1113	NA	NA	0.62314	SCMH1	0	intronic	0.61	6	5	1
1	4	rs12025777	rs35395205	G	A	41550741	0.1123	NA	NA	0.635548	SCMH1	0	intronic	0.802	6	5	1
1	4	rs12025777	rs34660906	T	C	41551968	0.1014	2.101e-05	-4.254	0.722765	SCMH1	0	intronic	8.268	5	5	1
1	4	rs12025777	rs12022978	A	G	41554088	0.1123	2.331e-06	4.722	0.635548	SCMH1	0	intronic	8.173	6	4	1
1	4	rs12025777	rs144485091	T	C	41558595	0.1123	1.938e-06	4.76	0.635548	SCMH1	0	intronic	1.925	5	5	1
1	4	rs12025777	rs12736881	A	G	41558996	0.1123	2.217e-06	-4.733	0.635548	SCMH1	0	intronic	1.832	6	5	1
1	4	rs12025777	rs34386859	T	C	41564024	0.1123	1.356e-06	-4.831	0.616442	SCMH1	0	intronic	1.954	7	5	1
1	4	rs12025777	rs2300649	T	C	41569203	0.1123	1.718e-06	4.784	0.635548	SCMH1	0	intronic	5.353	NA	5	1
1	4	rs12025777	rs11209531	T	C	41571021	0.1123	2.006e-06	-4.753	0.635548	SCMH1	0	intronic	0.896	7	4	1
1	4	rs12025777	rs3820090	A	G	41573652	0.1113	1.922e-06	4.761	0.661964	SCMH1	0	intronic	13.59	7	4	1
1	4	rs12025777	rs3904243	T	G	41574852	0.1133	1.838e-06	4.77	0.648041	SCMH1	0	intronic	1.93	NA	1	1
1	4	rs12025777	rs11209545	T	G	41576357	0.1133	1.76e-06	4.779	0.648041	SCMH1	0	intronic	10.83	6	2	1
1	4	rs12025777	rs11209576	T	C	41586029	0.1133	1.991e-06	4.754	0.648041	SCMH1	0	intronic	0.883	5	4	1
1	4	rs12025777	rs3766324	A	G	41588653	0.1133	1.726e-06	4.783	0.648041	SCMH1	0	intronic	6.243	2b	4	1
1	4	rs12025777	rs12041523	T	G	41598029	0.1133	3.108e-06	4.664	0.648041	SCMH1	0	intronic	13.01	7	4	1
1	4	rs12025777	rs12759023	T	C	41603978	0.1133	1.808e-06	4.774	0.648041	SCMH1	0	intronic	12.47	6	4	1
1	4	rs12025777	rs34286980	A	G	41608389	0.1133	1.976e-06	4.756	0.648041	SCMH1	0	intronic	5.783	7	4	1
1	4	rs12025777	rs35071528	C	G	41612657	0.1034	1.361e-05	4.35	0.722723	SCMH1	0	intronic	1.139	6	4	1
1	4	rs12025777	rs71648534	T	G	41613747	0.1133	1.95e-06	-4.758	0.648041	SCMH1	0	intronic	4.612	7	4	1
1	4	rs12025777	rs71648535	A	G	41613750	0.1133	1.881e-06	-4.766	0.648041	SCMH1	0	intronic	7.432	7	4	1
1	4	rs12025777	rs12048187	A	G	41616183	0.1133	1.808e-06	4.774	0.648041	SCMH1	0	intronic	3.212	6	4	1
1	4	rs12025777	rs12741932	A	C	41621182	0.1133	1.74e-06	4.781	0.648041	SCMH1	0	intronic	0.198	6	4	1
1	4	rs12025777	rs71648536	A	T	41632008	0.1133	1.902e-06	-4.764	0.648041	SCMH1	0	intronic	3.002	6	5	1
1	4	rs12025777	rs12744845	C	G	41642700	0.1133	1.591e-06	4.799	0.648041	SCMH1	0	intronic	7.854	6	5	1
1	4	rs12025777	rs12405355	G	T	41644485	0.1133	NA	NA	0.648041	SCMH1	0	intronic	10.05	6	5	1
1	4	rs12025777	rs12036051	G	A	41647664	0.1133	NA	NA	0.648041	SCMH1	0	intronic	7.81	7	5	1
1	4	rs12025777	rs12742803	A	G	41648131	0.1133	1.436e-06	-4.82	0.648041	SCMH1	0	intronic	1.848	5	4	1
1	4	rs12025777	rs12408956	A	G	41651952	0.1133	1.519e-06	-4.809	0.648041	SCMH1	0	intronic	1.002	6	4	1
1	4	rs12025777	rs35992757	T	C	41652862	0.1133	1.502e-06	-4.811	0.648041	SCMH1	0	intronic	0.674	6	5	1
1	4	rs12025777	rs12044539	A	C	41661732	0.1133	1.448e-06	4.818	0.648041	SCMH1	0	intronic	1.29	6	5	1
1	4	rs12025777	rs12759050	A	T	41664204	0.1133	1.464e-06	-4.816	0.648041	SCMH1	0	intronic	14.43	NA	5	1
1	4	rs12025777	rs71648538	C	G	41666087	0.1133	1.055e-06	-4.881	0.648041	SCMH1	0	intronic	1.057	6	5	1
1	4	rs12025777	rs35967406	T	C	41670853	0.1133	1.386e-06	4.827	0.648041	SCMH1	0	intronic	7.869	6	4	1
1	4	rs12025777	rs34216154	A	G	41670907	0.1133	1.277e-06	-4.843	0.648041	SCMH1	0	intronic	0.273	6	4	1
1	4	rs12025777	rs12045995	G	A	41673608	0.1133	NA	NA	0.648041	SCMH1	0	intronic	3.648	7	5	1
1	4	rs12025777	rs1032728	A	T	41679566	0.1143	8.948e-07	4.913	0.660622	SCMH1	0	intronic	2.606	6	5	0
1	4	rs12025777	rs12029321	C	G	41682530	0.1143	1.509e-06	-4.81	0.660622	SCMH1	0	intronic	11.56	5	4	1
1	4	rs12025777	rs35286837	T	G	41682998	0.1143	1.295e-06	4.84	0.660622	SCMH1	0	intronic	5.845	6	4	1
1	4	rs12025777	rs11209734	T	C	41698074	0.1143	1.847e-06	-4.769	0.660622	SCMH1	0	intronic	14.02	4	5	1
1	4	rs12025777	rs12037037	T	C	41698256	0.1143	1.732e-06	-4.782	0.660622	SCMH1	0	intronic	5.387	4	5	1
1	4	rs12025777	rs34813691	A	G	41700332	0.1143	1.409e-06	-4.824	0.660622	SCMH1	0	intronic	1.751	5	5	1
1	4	rs12025777	rs8179465	A	G	41701747	0.1143	1.578e-06	-4.801	0.660622	SCMH1	0	intronic	13.68	7	5	1
1	4	rs12025777	rs12754476	A	C	41707651	0.1143	NA	NA	0.660622	SCMH1	0	intronic	10.78	4	1	1
1	4	rs12025777	rs2363805	T	G	41719434	0.1143	2.308e-06	-4.724	0.660622	ENSG00000235358	0	ncRNA_intronic	1.534	6	9	1
1	4	rs12025777	rs71648540	A	G	41722295	0.1143	1.497e-06	-4.812	0.660622	ENSG00000235358	0	ncRNA_intronic	3.145	7	5	1
1	4	rs12025777	rs10524	T	C	41726473	0.1173	7.594e-07	4.946	0.640454	ENSG00000235358	0	ncRNA_exonic	1.213	7	5	1
1	4	rs12025777	rs111309254	A	G	41736000	0.1173	1.278e-06	4.843	0.640454	ENSG00000235358	0	ncRNA_intronic	2.399	7	5	1
1	4	rs12025777	rs4131949	T	C	41738637	0.1173	9.48e-07	-4.902	0.640454	ENSG00000235358	0	ncRNA_intronic	10.79	4	5	1
1	4	rs12025777	rs35813191	T	C	41742800	0.1173	8.436e-07	4.925	0.640454	ENSG00000235358	0	ncRNA_intronic	1.348	6	5	1
1	4	rs12025777	rs35883594	A	G	41744093	0.1173	6.688e-07	4.97	0.640454	ENSG00000235358	0	ncRNA_intronic	3.126	5	2	1
1	4	rs12025777	rs16828019	T	C	41745035	0.1173	6.077e-07	-4.989	0.640454	ENSG00000235358	0	ncRNA_intronic	3.175	6	5	1
1	4	rs12025777	rs12025777	T	G	41748897	0.07952	1.035e-08	-5.725	1	ENSG00000235358	0	ncRNA_intronic	2.94	5	5	1
1	4	rs1343775	rs12035012	A	C	41750648	0.2137	7.7e-17	-8.336	1	ENSG00000235358	0	downstream	5.084	7	5	1
1	4	rs1343775	rs34762587	T	C	41752465	0.3091	3.391e-07	5.1	0.60348	ENSG00000235358	1932	intergenic	10.69	4	5	1
1	4	rs1343775	rs12029950	A	G	41753165	0.2127	1.696e-16	-8.242	0.994375	ENSG00000235358	2632	intergenic	5.416	6	5	1
1	4	rs1343775	rs35318047	T	C	41755166	0.2137	1.455e-16	-8.26	1	ENSG00000235358	4633	intergenic	2.195	6	5	1
1	4	rs1343775	rs35493284	A	T	41755189	0.2137	1.363e-16	-8.268	1	ENSG00000235358	4656	intergenic	15.01	6	5	1
1	4	rs1343775	rs12027685	A	G	41756298	0.2127	1.672e-16	-8.244	0.994375	ENSG00000235358	5765	intergenic	8.462	5	5	1
1	4	rs1343775	rs12024413	A	G	41756416	0.2127	1.52e-16	8.255	0.994375	ENSG00000235358	5883	intergenic	3.498	5	5	1
1	4	rs1343775	rs34027267	T	C	41756677	0.2127	1.662e-16	8.244	0.994375	ENSG00000235358	6144	intergenic	4.5	3a	5	1
1	4	rs1343775	rs12025254	A	G	41756906	0.2137	1.546e-16	8.253	1	ENSG00000235358	6373	intergenic	4.303	5	5	1
1	4	rs1343775	rs12722758	A	G	41757015	0.2127	1.826e-16	-8.233	0.994375	ENSG00000235358	6482	intergenic	17.44	5	5	1
1	4	rs1343775	rs12723893	T	C	41757040	0.2127	1.681e-16	-8.243	0.994375	ENSG00000235358	6507	intergenic	15.64	5	5	1
1	4	rs1343775	rs12035913	T	C	41757057	0.2127	1.474e-16	-8.259	0.994375	ENSG00000235358	6524	intergenic	18.03	5	5	1
1	4	rs1343775	rs1343776	A	G	41757718	0.2127	1.754e-16	-8.238	0.994375	ENSG00000235358	7185	intergenic	19.15	NA	5	1
1	4	rs1343775	rs1343775	A	G	41757993	0.2137	7.497e-17	8.339	1	ENSG00000235358	7460	intergenic	2.143	NA	5	1
1	4	rs1343775	rs12749636	A	G	41758446	0.2137	1.625e-16	8.247	1	ENSG00000235358	7913	intergenic	0.073	6	5	1
1	4	rs1343775	rs60552457	A	C	41759499	0.2127	2.666e-16	-8.188	0.994375	ENSG00000235358	8966	intergenic	3.321	5	5	1
1	4	rs1343775	rs12739950	T	C	41759891	0.2127	1.832e-16	-8.233	0.994375	ENSG00000235358	9358	intergenic	4.671	5	5	1
1	4	rs1343775	rs12740093	T	C	41760001	0.2127	1.777e-16	-8.236	0.994375	ENSG00000235358	9468	intergenic	4.967	5	5	1
1	4	rs1343775	rs12038894	T	C	41760207	0.2127	1.814e-16	-8.234	0.994375	ENSG00000235358	9674	intergenic	2.629	5	5	1
1	4	rs1343775	rs12038924	T	C	41760317	0.2127	1.813e-16	-8.234	0.994375	ENSG00000235358	9784	intergenic	5.422	5	5	1
1	4	rs1343775	rs12032514	A	G	41760562	0.2127	1.84e-16	-8.232	0.994375	ENSG00000235358	10029	intergenic	2.01	6	5	1
1	4	rs1343775	rs12039767	T	C	41760860	0.2127	1.921e-16	-8.227	0.994375	ENSG00000235358	10327	intergenic	2.558	6	5	1
1	4	rs1343775	rs12030183	T	C	41761220	0.3101	2.957e-07	5.126	0.600728	ENSG00000235358	10687	intergenic	2.27	5	5	1
1	4	rs1343775	rs12731400	T	C	41761352	0.2137	1.201e-16	8.283	1	ENSG00000235358	10819	intergenic	1.713	6	5	1
1	4	rs1343775	rs12032756	A	G	41761429	0.2137	1.484e-16	-8.258	1	ENSG00000235358	10896	intergenic	0.412	7	5	1
1	4	rs1343775	rs55859000	T	C	41761441	0.2137	1.272e-16	8.276	1	ENSG00000235358	10908	intergenic	0.169	6	5	1
1	4	rs1343775	rs12031068	T	C	41761715	0.2137	1.307e-16	8.273	1	ENSG00000235358	11182	intergenic	0.313	6	5	1
1	4	rs1343775	rs12040690	C	G	41761737	0.2147	1.934e-16	8.226	0.994375	ENSG00000235358	11204	intergenic	0.877	7	5	1
1	4	rs1343775	rs12030372	A	G	41762029	0.2137	1.259e-16	8.277	1	ENSG00000235358	11496	intergenic	6.744	5	5	1
1	4	rs1343775	rs12030420	A	T	41762156	0.3091	3.75e-07	5.081	0.60348	ENSG00000235358	11623	intergenic	1.296	5	5	1
1	4	rs1343775	rs12032162	T	C	41762935	0.2137	1.734e-16	8.239	1	ENSG00000235358	12402	intergenic	0.19	7	5	1
1	4	rs1343775	rs12031417	A	G	41763028	0.2137	1.718e-16	8.24	1	ENSG00000235358	12495	intergenic	5.354	7	5	1
1	4	rs1343775	rs12037560	A	C	41763891	0.2137	1.99e-16	-8.223	1	ENSG00000235358	13358	intergenic	1.523	7	5	1
1	4	rs1343775	rs12037588	C	G	41763955	0.2137	1.978e-16	8.223	1	ENSG00000235358	13422	intergenic	2.939	7	5	1
1	4	rs1343775	rs12037657	T	C	41764175	0.2137	1.37e-16	-8.267	1	ENSG00000235358	13642	intergenic	0.718	7	5	1
1	4	rs1343775	rs36143444	T	C	41764310	0.2197	NA	NA	0.955837	ENSG00000235358	13777	intergenic	9.486	NA	5	0
1	4	rs1343775	rs12027990	T	C	41764437	0.2137	1.614e-16	8.248	1	ENSG00000235358	13904	intergenic	1.887	7	5	1
1	4	rs1343775	rs12028010	T	C	41764471	0.2207	4.931e-16	8.113	0.950827	ENSG00000235358	13938	intergenic	0.284	7	5	1
1	4	rs1343775	rs34190295	T	C	41765879	0.2127	2.265e-16	8.207	0.994375	ENSG00000235358	15346	intergenic	1.693	7	5	1
1	4	rs1343775	rs34961305	A	G	41765944	0.2127	2.187e-16	8.211	0.994375	ENSG00000235358	15411	intergenic	0.692	7	5	1
1	4	rs1343775	rs35812095	T	C	41766074	0.2127	2.101e-16	8.216	0.994375	ENSG00000235358	15541	intergenic	3.801	5	5	1
1	4	rs1343775	rs2364535	A	G	41766236	0.2137	2.662e-16	-8.188	0.988707	ENSG00000235358	15703	intergenic	16.6	6	5	1
1	4	rs1343775	rs12030762	T	C	41766761	0.2107	1.244e-16	8.279	0.983164	ENSG00000235358	16228	intergenic	15.21	6	5	1
1	4	rs1343775	rs35529558	A	G	41767022	0.2127	2.206e-16	8.21	0.994375	ENSG00000235358	16489	intergenic	0.407	6	5	1
1	4	rs1343775	rs12034357	A	G	41768229	0.2127	NA	NA	0.994375	ENSG00000235358	17696	intergenic	5.468	6	5	1
1	4	rs1343775	rs7553908	T	G	41768241	0.2127	NA	NA	0.994375	ENSG00000235358	17708	intergenic	0.681	7	5	0
1	4	rs1343775	rs12031169	G	A	41768251	0.2127	NA	NA	0.994375	ENSG00000235358	17718	intergenic	4.123	7	5	1
1	4	rs1343775	rs12041533	T	C	41768271	0.2127	1.309e-16	-8.273	0.994375	ENSG00000235358	17738	intergenic	0.565	6	5	1
1	4	rs1343775	rs35502198	T	G	41768541	0.2127	1.466e-16	8.259	0.994375	ENSG00000235358	18008	intergenic	5.556	7	5	1
1	4	rs1343775	rs34862272	A	C	41768653	0.2127	2.454e-16	8.197	0.994375	ENSG00000235358	18120	intergenic	0.075	6	5	1
1	4	rs1343775	rs34796305	A	G	41769045	0.2127	2.189e-16	8.211	0.994375	ENSG00000235358	18512	intergenic	0.786	7	5	1
1	4	rs1343775	rs55707527	T	G	41769113	0.2127	1.259e-16	-8.277	0.983137	ENSG00000235358	18580	intergenic	2.433	7	5	1
1	4	rs1343775	rs36060279	A	T	41769114	0.2127	1.264e-16	8.277	0.983137	ENSG00000235358	18581	intergenic	4.691	7	5	1
1	4	rs1343775	rs35972058	A	G	41769146	0.2137	4.213e-16	-8.132	0.988739	ENSG00000235358	18613	intergenic	0.024	7	5	1
1	4	rs1343775	rs12032906	T	C	41769158	0.2137	4.673e-16	8.12	0.988739	ENSG00000235358	18625	intergenic	2.072	7	5	1
1	4	rs1343775	rs34315814	T	C	41769172	0.2137	5.725e-16	8.095	0.988739	ENSG00000235358	18639	intergenic	2.12	7	5	1
1	4	rs1343775	rs12032191	A	G	41769218	0.2127	3.36e-16	8.16	0.994375	ENSG00000235358	18685	intergenic	1.826	6	5	1
1	4	rs1343775	rs12032215	A	G	41769334	0.2127	2.137e-16	8.214	0.994375	ENSG00000235358	18801	intergenic	3.025	7	5	1
1	4	rs1343775	rs12035353	A	G	41769337	0.2127	2.93e-16	-8.176	0.994375	ENSG00000235358	18804	intergenic	0.189	7	5	1
1	4	rs1343775	rs2364534	A	G	41770055	0.2127	2.407e-16	8.2	0.994375	ENSG00000235358	19522	intergenic	4.439	NA	5	1
1	4	rs1343775	rs2364533	C	G	41770083	0.2127	2.228e-16	8.209	0.994375	ENSG00000235358	19550	intergenic	0.357	7	5	1
1	4	rs1343775	rs68132196	A	C	41770620	0.2137	2.317e-16	-8.204	0.988739	ENSG00000235358	20087	intergenic	1.747	6	5	1
1	4	rs1343775	rs56381773	T	C	41770718	0.2127	2.198e-16	8.211	0.994375	ENSG00000235358	20185	intergenic	2.628	6	5	1
1	4	rs1343775	rs56096486	A	C	41771230	0.2127	2.268e-16	8.207	0.994375	ENSG00000235358	20697	intergenic	1.232	7	2	1
1	4	rs1343775	rs57529969	A	G	41771683	0.2127	2.281e-16	-8.206	0.994375	ENSG00000235358	21150	intergenic	4.056	5	2	1
1	4	rs1343775	rs60825180	A	G	41771744	0.2127	2.258e-16	8.208	0.994375	ENSG00000235358	21211	intergenic	0.841	5	2	1
1	4	rs1343775	rs61477144	A	G	41771793	0.2127	2.163e-16	8.213	0.994375	ENSG00000235358	21260	intergenic	4.237	5	2	1
1	4	rs1343775	rs7521544	A	G	41772126	0.2127	2.468e-16	-8.197	0.994375	ENSG00000235358	21593	intergenic	0.199	6	5	1
1	4	rs1343775	rs7513682	T	C	41772167	0.2127	2.267e-16	8.207	0.994375	ENSG00000235358	21634	intergenic	3.098	6	5	1
1	4	rs1343775	rs7556585	A	G	41772417	0.2127	2.865e-16	8.179	0.994375	ENSG00000235358	21884	intergenic	1.734	7	5	1
1	4	rs1343775	rs12038386	A	G	41772442	0.2127	2.562e-16	-8.192	0.994375	ENSG00000235358	21909	intergenic	1.867	6	5	1
1	4	rs1343775	rs56409354	A	G	41772971	0.2137	2.685e-16	-8.187	0.988739	ENSG00000235358	22438	intergenic	11.19	6	5	1
1	4	rs1343775	rs34008156	T	G	41773182	0.2127	2.342e-16	-8.203	0.994375	ENSG00000235358	22649	intergenic	7.199	6	5	1
1	4	rs1343775	rs12744310	T	C	41773502	0.2127	2.497e-16	-8.195	0.994375	ENSG00000235358	22969	intergenic	6.213	5	5	1
1	4	rs1343775	rs56077539	T	C	41773942	0.2127	2.271e-16	8.207	0.994375	ENSG00000235358	23409	intergenic	7.821	5	5	1
1	4	rs1343775	rs55892603	C	T	41773994	0.2127	NA	NA	0.994375	ENSG00000235358	23461	intergenic	5.611	5	5	1
1	4	rs1343775	rs532841715	T	G	41774019	0.2127	NA	NA	0.994375	ENSG00000235358	23486	intergenic	1.571	NA	5	0
1	4	rs1343775	rs552847408	T	C	41774020	0.2127	NA	NA	0.994375	ENSG00000235358	23487	intergenic	3.398	NA	5	0
1	4	rs1343775	rs566110206	C	T	41774025	0.2127	NA	NA	0.994375	ENSG00000235358	23492	intergenic	4.03	NA	5	0
1	4	rs1343775	rs55929643	A	G	41774212	0.2137	1.748e-16	8.238	0.988707	ENSG00000235358	23679	intergenic	14.95	5	5	1
1	4	rs1343775	rs34759578	A	G	41774350	0.2127	2.258e-16	-8.208	0.994375	ENSG00000235358	23817	intergenic	0.825	3a	5	1
1	4	rs1343775	rs72665690	C	G	41775236	0.2127	1.951e-16	8.225	0.994375	ENSG00000235358	24703	intergenic	0.422	6	5	1
1	4	rs1343775	rs72665691	A	T	41775245	0.2127	1.826e-16	-8.233	0.994375	ENSG00000235358	24712	intergenic	5.168	6	5	1
1	4	rs1343775	rs72665692	A	G	41775379	0.2137	2.152e-16	8.213	0.988707	ENSG00000235358	24846	intergenic	1.142	6	5	1
1	4	rs1343775	rs72665694	A	G	41775384	0.2137	2.174e-16	8.212	0.988707	ENSG00000235358	24851	intergenic	1.023	6	5	1
1	4	rs1343775	rs72665696	T	G	41775429	0.2137	1.664e-16	-8.244	0.988707	ENSG00000235358	24896	intergenic	1.794	7	5	1
1	4	rs1343775	rs72665698	T	G	41775589	0.2137	1.757e-16	8.238	0.988707	ENSG00000235358	25056	intergenic	0.735	6	5	1
1	4	rs1343775	rs12751511	A	T	41776403	0.2137	2.139e-16	8.214	0.988707	ENSG00000235358	25870	intergenic	0.775	6	5	1
1	4	rs1343775	rs34073585	T	C	41777199	0.2137	1.36e-16	8.268	0.988707	ENSG00000235358	26666	intergenic	8.655	7	5	1
1	4	rs1343775	rs12756822	G	A	41777327	0.2137	NA	NA	0.988707	ENSG00000235358	26794	intergenic	0.184	6	5	1
1	4	rs1343775	rs12036554	T	G	41777989	0.2137	2.364e-16	8.202	0.988707	ENSG00000235358	27456	intergenic	3.78	6	5	1
1	4	rs1343775	rs12036555	T	C	41777990	0.2137	2.23e-16	8.209	0.988707	ENSG00000235358	27457	intergenic	2.976	6	5	1
1	4	rs1343775	rs1892417	T	C	41779673	0.2217	4.797e-15	7.832	0.935176	ENSG00000235358	29140	intergenic	0.24	4	2	1
1	4	rs1343775	rs1892419	T	C	41781151	0.2237	3.363e-15	7.877	0.901814	ENSG00000235358	30618	intergenic	0.021	4	1	1
1	4	rs1343775	rs1892420	T	C	41781410	0.2227	9.441e-15	-7.747	0.906965	ENSG00000235358	30877	intergenic	15.16	4	5	1
1	4	rs1343775	rs28541673	A	G	41781994	0.2227	6.259e-15	7.799	0.906965	ENSG00000235358	31461	intergenic	8.639	5	5	1
1	4	rs1343775	rs12724625	C	G	41782270	0.2227	7.093e-15	-7.783	0.906965	ENSG00000235358	31737	intergenic	1.009	5	5	1
1	4	rs1343775	rs12041352	T	G	41782781	0.2227	6.844e-15	7.787	0.906965	ENSG00000235358	32248	intergenic	1.65	5	5	1
1	4	rs1343775	rs28566545	A	G	41783233	0.2227	6.83e-15	-7.788	0.906965	ENSG00000235358	32700	intergenic	7.343	5	5	1
1	4	rs1343775	rs16828067	A	G	41783552	0.2227	5.887e-15	7.806	0.906965	ENSG00000235358	33019	intergenic	3.814	5	5	1
1	4	rs1343775	rs16828071	A	G	41783603	0.2227	6.334e-15	-7.797	0.906965	ENSG00000235358	33070	intergenic	6.054	5	5	1
1	4	rs1343775	rs2363810	A	G	41783873	0.2227	4.433e-15	-7.842	0.906965	ENSG00000235358	33340	intergenic	4.343	5	5	1
1	4	rs1343775	rs67483852	T	C	41784465	0.2227	5.957e-15	-7.805	0.906965	ENSG00000235358	33932	intergenic	4.209	6	5	1
1	4	rs1343775	rs36015391	T	G	41784805	0.2227	7.485e-15	7.776	0.906965	ENSG00000235358	34272	intergenic	5.628	6	5	1
1	4	rs1343775	rs28399806	T	C	41784971	0.2227	8.097e-15	-7.766	0.906965	ENSG00000235358	34438	intergenic	4.504	5	5	1
1	4	rs1343775	rs12047875	T	C	41785176	0.2227	NA	NA	0.906965	ENSG00000235358	34643	intergenic	2.322	5	5	1
1	4	rs1343775	rs35932978	A	C	41785445	0.2227	5.876e-15	7.807	0.906965	ENSG00000235358	34912	intergenic	1.788	5	2	1
1	4	rs1343775	rs12042464	A	G	41786854	0.2227	9.655e-15	-7.744	0.906965	ENSG00000235358	36321	intergenic	0.925	5	5	1
1	4	rs1343775	rs35021924	A	G	41786907	0.2227	9.508e-15	7.746	0.906965	ENSG00000235358	36374	intergenic	0.381	5	5	1
1	4	rs1343775	rs12043581	A	G	41788265	0.2227	8.787e-15	-7.756	0.906965	ENSG00000235358	37732	intergenic	3.079	5	5	1
1	4	rs1343775	rs35592291	A	G	41791271	0.2227	1.061e-14	-7.732	0.906965	FOXO6	36323	intergenic	3.546	7	5	1
1	4	rs1343775	rs2363811	A	G	41791865	0.2227	9.065e-15	7.752	0.906965	FOXO6	35729	intergenic	1.793	4	5	1
1	4	rs1343775	rs12026778	T	C	41792274	0.2227	6.334e-15	-7.797	0.906965	FOXO6	35320	intergenic	9.665	5	5	1
1	4	rs1343775	rs4453028	A	G	41792523	0.2227	8.729e-15	-7.757	0.906965	FOXO6	35071	intergenic	2.564	7	5	1
1	4	rs1343775	rs4406620	A	G	41792765	0.2227	1.012e-14	7.738	0.906965	FOXO6	34829	intergenic	0.557	5	5	1
1	4	rs1343775	rs35436312	A	G	41793358	0.2227	9.447e-15	-7.746	0.906965	FOXO6	34236	intergenic	14.88	5	5	1
1	4	rs1343775	rs1316274	A	G	41793658	0.2227	7.312e-15	-7.779	0.906965	FOXO6	33936	intergenic	21.4	NA	5	1
1	4	rs1343775	rs12037129	T	C	41794301	0.2227	8.918e-15	7.754	0.906965	FOXO6	33293	intergenic	6.323	5	5	1
1	4	rs1343775	rs17362424	T	G	41794403	0.2207	1.407e-14	-7.696	0.895814	FOXO6	33191	intergenic	2.908	5	5	1
1	4	rs1343775	rs72667608	A	G	41794773	0.2227	7.354e-15	7.778	0.906965	FOXO6	32821	intergenic	0.667	5	5	1
1	4	rs1343775	rs72667610	A	G	41794810	0.2227	7.691e-15	-7.773	0.906965	FOXO6	32784	intergenic	4.609	5	5	1
1	4	rs1343775	rs35410722	T	C	41796264	0.2227	8.468e-15	-7.76	0.906965	FOXO6	31330	intergenic	2.671	4	5	1
1	4	rs1343775	rs34539673	A	G	41796817	0.2227	8.694e-15	-7.757	0.906965	FOXO6	30777	intergenic	5.255	4	2	1
1	4	rs1343775	rs12040046	A	G	41797583	0.2227	7.495e-15	7.776	0.906965	FOXO6	30011	intergenic	4.097	6	5	1
1	4	rs1343775	rs35690915	T	C	41797999	0.2227	7.996e-15	7.768	0.906965	FOXO6	29595	intergenic	1.175	7	5	1
1	4	rs1343775	rs12728217	T	C	41798269	0.2227	8.01e-15	-7.767	0.906965	FOXO6	29325	intergenic	0.069	5	5	1
1	4	rs1343775	rs12752553	T	C	41798517	0.2227	8.302e-15	7.763	0.906965	FOXO6	29077	intergenic	2.896	7	5	1
1	4	rs1343775	rs12732820	T	C	41798773	0.2227	8.114e-15	-7.766	0.906965	FOXO6	28821	intergenic	3.524	4	5	1
1	4	rs1343775	rs12045184	A	G	41799611	0.2227	9.725e-15	-7.743	0.906965	FOXO6	27983	intergenic	1.318	6	5	1
1	4	rs1343775	rs12724690	T	C	41800257	0.2227	8.421e-15	7.761	0.906965	FOXO6	27337	intergenic	0.417	7	5	1
1	4	rs1343775	rs35464028	T	G	41800474	0.2227	8.593e-15	7.759	0.906965	FOXO6	27120	intergenic	4.864	7	5	1
1	4	rs1343775	rs34152153	T	C	41801408	0.2227	1.033e-14	7.735	0.906965	FOXO6	26186	intergenic	1.05	6	5	1
1	4	rs1343775	rs36040148	T	C	41801448	0.2227	1.215e-14	7.714	0.906965	FOXO6	26146	intergenic	3.107	7	5	1
1	4	rs1343775	rs35807669	T	C	41801652	0.2227	1.152e-14	-7.721	0.906965	FOXO6	25942	intergenic	2.177	6	5	1
1	4	rs1343775	rs12026404	A	C	41801912	0.2227	1.127e-14	-7.724	0.906965	FOXO6	25682	intergenic	2.779	5	5	1
1	4	rs1343775	rs12047272	A	G	41801943	0.2227	1.14e-14	-7.723	0.906965	FOXO6	25651	intergenic	0.943	5	5	1
1	4	rs1343775	rs12047161	T	G	41807528	0.2217	1.359e-14	-7.7	0.901373	FOXO6	20066	intergenic	4.402	4	2	1
1	4	rs1343775	rs12757611	A	G	41808972	0.2217	1.227e-14	-7.713	0.901373	FOXO6	18622	intergenic	2.06	5	5	1
1	4	rs1343775	rs12028244	T	C	41809162	0.2227	1.407e-14	-7.696	0.896217	FOXO6	18432	intergenic	1.695	6	5	1
1	4	rs1343775	rs12046670	T	G	41809312	0.2217	1.361e-14	7.7	0.901373	FOXO6	18282	intergenic	5.799	7	5	1
1	4	rs1343775	rs12045979	A	G	41809477	0.2217	1.392e-14	7.697	0.901373	FOXO6	18117	intergenic	5.587	5	5	1
1	4	rs1343775	rs12047439	A	T	41809640	0.2207	7.002e-15	-7.784	0.88455	FOXO6	17954	intergenic	7.309	5	5	1
1	4	rs1343775	rs12048805	A	G	41814276	0.2237	3.546e-14	-7.577	0.880448	FOXO6	13318	intergenic	4.169	7	5	1
1	4	rs1343775	rs12048808	C	G	41814308	0.2217	6.575e-14	-7.496	0.869408	FOXO6	13286	intergenic	0.374	7	5	1
1	4	rs1343775	rs12022655	T	G	41816319	0.2237	3.888e-14	-7.565	0.880448	FOXO6	11275	intergenic	1.431	7	5	1
1	4	rs1343775	rs35030637	T	C	41816686	0.2237	3.734e-14	-7.57	0.880448	FOXO6	10908	intergenic	5.745	6	5	1
1	4	rs1343775	rs12032040	T	C	41818307	0.2237	3.993e-14	-7.561	0.880448	FOXO6	9287	intergenic	3.137	5	5	1
1	4	rs1343775	rs6660265	T	C	41818676	0.2237	4.563e-14	7.544	0.880448	FOXO6	8918	intergenic	1.484	6	5	1
1	4	rs1343775	rs12024263	A	G	41820949	0.2247	2.434e-14	7.625	0.865591	FOXO6	6645	intergenic	0.966	4	5	1
1	4	rs1343775	rs56044892	T	C	41830086	0.2038	1.054e-10	-6.459	0.720076	FOXO6	0	intronic	13.07	5	2	1
1	4	rs10218712	rs10218712	T	G	41832297	0.3449	8.793e-09	5.753	1	FOXO6	0	intronic	6.289	4	1	1
1	4	rs10218712	rs61774743	T	C	41832861	0.3569	1.047e-08	-5.723	0.923888	FOXO6	0	intronic	6.117	4	1	1
1	4	rs1892423	rs2364543	T	G	41833089	0.4324	3.203e-09	5.921	0.839214	FOXO6	0	intronic	4.232	4	2	1
1	4	rs1892423	rs2364544	A	G	41833162	0.4324	2.913e-09	-5.936	0.839214	FOXO6	0	intronic	2.425	4	2	1
1	4	rs1892423	rs11578963	A	G	41834183	0.4334	1.73e-09	6.021	0.835328	FOXO6	0	intronic	13.57	5	2	1
1	4	rs1892423	rs61774744	A	G	41834444	0.4324	3.191e-09	-5.921	0.839214	FOXO6	0	intronic	1.934	5	2	1
1	4	rs1892423	rs11581271	C	G	41835061	0.4334	1.987e-09	-5.999	0.842345	FOXO6	0	intronic	0.364	5	5	1
1	4	rs1892423	rs4636447	A	G	41835633	0.4334	2.839e-09	5.941	0.842345	FOXO6	0	intronic	0.627	NA	5	1
1	4	rs1892423	rs7522116	C	T	41835685	0.4592	NA	NA	0.742243	FOXO6	0	intronic	2.598	6	5	1
1	4	rs1892423	rs10889949	T	G	41836026	0.4344	3.485e-09	5.907	0.837781	FOXO6	0	intronic	7.131	5	5	1
1	4	rs10218712	rs6683382	A	T	41836787	0.3569	1.546e-08	5.656	0.915483	FOXO6	0	intronic	0.662	5	5	1
1	4	rs1892423	rs4660192	T	C	41842350	0.494	1.198e-08	5.7	0.879174	FOXO6	0	intronic	6.565	3a	4	1
1	4	rs1892423	rs60144015	A	C	41845246	0.492	1.16e-08	5.705	0.885465	FOXO6	0	intronic	18.65	5	4	1
1	4	rs1892423	rs61774752	T	C	41847024	0.493	7.429e-09	-5.781	0.881726	FOXO6	0	intronic	4.305	2b	1	1
1	4	rs1892423	rs4359027	A	G	41848296	0.4911	1.665e-08	5.644	0.889218	FOXO6	0	exonic	13.18	2b	1	1
1	4	rs1892423	rs1892423	A	C	41849340	0.4642	1.581e-09	-6.036	1	FOXO6	0	downstream	4.717	NA	1	1
1	4	rs1892423	rs10889959	T	C	41849735	0.4642	2.217e-09	-5.981	1	FOXO6	0	downstream	1.35	4	2	1
1	4	rs1892423	rs10749805	A	G	41850182	0.4672	1.63e-09	6.031	0.987525	FOXO6	0	downstream	8.203	5	5	1
1	4	rs1892423	rs11209976	T	C	41851415	0.498	5.614e-09	5.828	0.872796	FOXO6	2153	intergenic	10.26	5	2	1
1	5	rs2782653	rs2992038	T	C	43949718	0.3867	1.622e-07	5.238	0.600769	HYI-AS1	27052	intergenic	1.704	NA	14	1
1	5	rs2782653	rs2992037	A	G	43949810	0.339	1.285e-07	5.281	0.725392	HYI-AS1	27144	intergenic	0.403	NA	14	1
1	5	rs2782653	rs2782653	C	G	43950265	0.2942	3.17e-08	5.532	1	HYI-AS1	27599	intergenic	11.87	5	5	1
1	5	rs2819336	rs34898652	A	G	43974091	0.3628	7.49e-09	5.78	0.793577	HYI-AS1	51425	intergenic	4.765	5	5	1
1	5	rs2819336	rs11210860	A	G	43982527	0.3579	1.382e-08	5.676	0.804758	PTPRF	14020	intergenic	3.275	6	5	1
1	5	rs2819336	rs2152113	T	C	43983569	0.3588	1.162e-08	5.705	0.808945	PTPRF	12978	intergenic	0.727	6	5	1
1	5	rs2819336	rs11577403	A	G	43989773	0.3569	2.674e-08	5.562	0.817169	PTPRF	6774	intergenic	0.177	7	5	1
1	5	rs2819336	rs2842189	T	C	44007648	0.3559	2.342e-10	6.337	0.925556	PTPRF	0	intronic	2.121	NA	2	1
1	5	rs2819336	rs2782640	T	C	44009033	0.3618	3.841e-10	-6.26	0.901948	PTPRF	0	intronic	5.981	5	2	1
1	5	rs58859557	rs58859557	T	C	44010456	0.06759	3.737e-08	5.503	1	PTPRF	0	intronic	4.049	5	2	0
1	5	rs58859557	rs6695915	A	G	44010571	0.09046	4.741e-07	-5.037	0.672477	PTPRF	0	intronic	9.786	5	2	0
1	5	rs2819336	rs951740	A	G	44011737	0.3658	3.54e-10	-6.273	0.912441	PTPRF	0	intronic	14.11	NA	1	1
1	5	rs2819336	rs2782641	A	G	44013355	0.3708	3.049e-09	-5.929	0.893689	PTPRF	0	intronic	17.53	5	3	1
1	5	rs2819336	rs2842188	T	C	44014280	0.3489	3.902e-11	6.608	0.972945	PTPRF	0	intronic	0.066	NA	2	1
1	5	rs2819336	rs2819333	A	T	44014573	0.3549	3.801e-11	6.612	0.956245	PTPRF	0	intronic	0.548	5	2	1
1	5	rs2819336	rs2819334	T	C	44014735	0.3588	4.61e-11	-6.583	0.940338	PTPRF	0	intronic	3.512	5	2	1
1	5	rs2819336	rs2819335	A	G	44014825	0.3509	3.747e-11	6.614	0.973447	PTPRF	0	intronic	2.401	5	2	1
1	5	rs2819336	rs2842187	T	C	44014949	0.3499	3.16e-11	6.639	0.977672	PTPRF	0	intronic	2.415	NA	2	1
1	5	rs2819336	rs2819336	T	C	44015809	0.3449	1.476e-12	7.077	1	PTPRF	0	intronic	3.271	4	1	1
1	5	rs2819336	rs11580258	A	G	44016015	0.3499	3.326e-11	6.631	0.977672	PTPRF	0	intronic	1.811	4	1	1
1	5	rs11210871	rs2819339	T	G	44018604	0.2555	1.547e-05	-4.322	0.670877	PTPRF	0	intronic	15.55	4	4	1
1	5	rs2819336	rs2842185	T	C	44019731	0.3499	4.347e-11	-6.592	0.977672	PTPRF	0	intronic	4	NA	4	1
1	5	rs11210871	rs2842183	T	C	44020394	0.2565	1.196e-05	4.378	0.673718	PTPRF	0	intronic	0.768	NA	4	1
1	5	rs11210871	rs2842181	T	C	44020528	0.2565	NA	NA	0.673718	PTPRF	0	intronic	0.168	NA	4	0
1	5	rs11210871	rs10890253	C	G	44021456	0.2565	1.167e-05	-4.384	0.673718	PTPRF	0	intronic	18.12	6	4	1
1	5	rs2819336	rs2842178	A	G	44022027	0.3499	8.8e-11	6.486	0.977672	PTPRF	0	intronic	1.645	NA	4	1
1	5	rs11210871	rs2494995	A	C	44022303	0.2565	8.595e-06	4.45	0.673718	PTPRF	0	intronic	9.361	NA	4	1
1	5	rs11210871	rs2842176	T	C	44022534	0.2565	1.285e-05	-4.363	0.673718	PTPRF	0	intronic	2.951	NA	3	1
1	5	rs11210871	rs2842175	A	G	44023615	0.2555	9.587e-06	-4.426	0.670877	PTPRF	0	intronic	5.924	NA	2	1
1	5	rs11210871	rs11580074	A	G	44024484	0.2555	1.033e-05	-4.41	0.670877	PTPRF	0	intronic	1.367	3a	1	1
1	5	rs2819336	rs11210869	A	G	44026040	0.3499	2.691e-11	-6.663	0.977672	PTPRF	0	intronic	0.488	5	1	1
1	5	rs11210871	rs10789435	T	G	44026053	0.2594	8.348e-06	-4.456	0.684839	PTPRF	0	intronic	0.789	5	1	1
1	5	rs11210871	rs3000761	T	C	44026089	0.2594	8.552e-06	-4.451	0.684839	PTPRF	0	intronic	3.167	5	1	1
1	5	rs11210871	rs68191270	A	C	44026180	0.2594	8.767e-06	-4.446	0.684839	PTPRF	0	intronic	1.38	5	1	1
1	5	rs11210871	rs12076635	C	G	44026656	0.2604	7.213e-06	4.487	0.687721	PTPRF	0	intronic	2.095	5	4	1
1	5	rs2819336	rs61769611	A	G	44028913	0.3499	2.681e-11	6.663	0.977672	PTPRF	0	intronic	1.999	5	4	1
1	5	rs11210871	rs2842194	A	G	44028962	0.2575	1.282e-05	-4.363	0.711028	PTPRF	0	intronic	9.865	NA	4	1
1	5	rs11210871	rs11210871	C	G	44029353	0.331	3.867e-09	-5.89	1	PTPRF	0	intronic	0.139	5	5	1
1	5	rs11210871	rs10890255	A	G	44031493	0.2565	8.018e-06	-4.465	0.707414	PTPRF	0	intronic	3.884	4	1	1
1	5	rs11210871	rs2478978	T	C	44031657	0.2575	1.629e-05	-4.31	0.711028	PTPRF	0	intronic	7.758	2b	1	1
1	5	rs2819336	rs11586016	C	G	44031793	0.3549	1.273e-10	6.43	0.956245	PTPRF	0	intronic	5.506	4	1	1
1	5	rs11210871	rs12089622	A	C	44033768	0.2584	7.781e-05	3.951	0.713953	PTPRF	0	intronic	3.833	5	4	1
1	5	rs2819336	rs4660736	A	C	44034901	0.3668	NA	NA	0.907263	PTPRF	0	intronic	1.668	2b	4	1
1	5	rs11210871	rs2842186	A	G	44035093	0.2545	1.283e-05	4.363	0.677882	PTPRF	0	intronic	2.34	NA	4	1
1	5	rs2819336	rs943513	A	G	44035472	0.3579	1.438e-10	6.412	0.93586	PTPRF	0	intronic	6.533	NA	4	1
1	5	rs2819336	rs1887402	A	G	44036085	0.3539	9.553e-11	6.474	0.95247	PTPRF	0	intronic	15.46	NA	4	1
1	5	rs11210871	rs3001723	A	G	44037685	0.326	1.309e-08	-5.685	0.906438	PTPRF	0	intronic	2.669	5	4	1
1	5	rs11210871	rs2819340	T	C	44039710	0.2465	1.658e-05	-4.307	0.654235	PTPRF	0	intronic	1.663	5	4	1
1	5	rs2819336	rs2842171	A	G	44039850	0.3569	1.1e-10	-6.452	0.939632	PTPRF	0	intronic	4.918	5	4	1
1	5	rs11210871	rs10789436	T	G	44040966	0.2475	1.696e-05	-4.302	0.657828	PTPRF	0	intronic	3.04	2b	4	1
1	5	rs58859557	rs45605334	T	C	44041744	0.07256	1.671e-06	4.79	0.815616	PTPRF	0	intronic	13.94	5	4	0
1	5	rs11210871	rs650729	C	G	44042539	0.2475	1.956e-05	-4.27	0.657828	PTPRF	0	intronic	6.392	5	4	1
1	5	rs11210871	rs663618	T	C	44043105	0.2475	1.257e-05	-4.367	0.657828	PTPRF	0	intronic	3.148	5	4	1
1	5	rs2819336	rs552638	A	G	44043392	0.3539	1.07e-10	6.457	0.9433	PTPRF	0	intronic	4.218	5	4	1
1	5	rs11210871	rs2004899	A	G	44045465	0.2485	1.476e-05	-4.332	0.660511	PTPRF	0	intronic	4.636	7	4	1
1	5	rs2819336	rs1808730	A	G	44045528	0.3579	1.851e-10	6.373	0.935393	PTPRF	0	intronic	3.608	6	4	1
1	5	rs2819336	rs3791134	A	G	44049156	0.3579	1.647e-10	6.391	0.935393	PTPRF	0	intronic	5.008	5	4	1
1	5	rs2819336	rs3791136	T	C	44049947	0.3549	1.22e-10	6.437	0.947768	PTPRF	0	intronic	0.132	5	4	1
1	5	rs11210871	rs3791137	A	G	44050004	0.2485	1.644e-05	4.308	0.660511	PTPRF	0	intronic	0.046	2b	4	1
1	5	rs11210871	rs3791138	A	C	44050027	0.2485	2.782e-05	-4.191	0.660511	PTPRF	0	intronic	0.003	4	4	1
1	5	rs11210871	rs3828150	T	C	44050856	0.2475	1.688e-05	-4.303	0.657828	PTPRF	0	intronic	0.074	5	4	1
1	5	rs2819336	rs6698389	A	G	44051574	0.3529	1.255e-10	-6.433	0.947618	PTPRF	0	intronic	5.433	5	4	1
1	5	rs2819336	rs61769642	A	G	44051630	0.3569	1.354e-10	6.421	0.930926	PTPRF	0	intronic	1.176	5	4	1
1	5	rs2819336	rs3791139	T	C	44051771	0.3579	1.521e-10	-6.403	0.935393	PTPRF	0	intronic	4.733	5	4	1
1	5	rs2819336	rs3791140	A	G	44051778	0.3529	1.308e-10	6.426	0.947618	PTPRF	0	intronic	1.958	5	4	1
1	5	rs2819336	rs501299	A	C	44051834	0.3529	1.278e-10	-6.43	0.947618	PTPRF	0	intronic	0.26	5	4	1
1	5	rs2819336	rs61769643	A	G	44052198	0.2803	7.833e-05	3.949	0.658942	PTPRF	0	intronic	14.14	5	4	1
1	5	rs11210871	rs10890261	T	G	44052377	0.2485	1.489e-05	-4.33	0.660511	PTPRF	0	intronic	5.969	5	4	1
1	5	rs2819336	rs58097944	A	G	44054994	0.4334	6.138e-06	4.522	0.675009	PTPRF	0	intronic	1.91	5	4	1
1	5	rs11210871	rs573350	T	C	44057950	0.2495	1.939e-05	-4.272	0.663214	PTPRF	0	intronic	1.482	4	4	1
1	5	rs2819336	rs605709	T	C	44058467	0.3549	1.637e-10	6.392	0.939002	PTPRF	0	intronic	8.228	5	4	1
1	5	rs2819336	rs72673082	A	G	44059242	0.3539	1.697e-10	6.387	0.9433	PTPRF	0	intronic	5	5	4	1
1	5	rs2819336	rs583040	A	G	44060483	0.3539	1.752e-10	6.382	0.9433	PTPRF	0	intronic	0.315	5	4	1
1	5	rs11210871	rs674725	T	C	44061795	0.2475	3.331e-05	4.15	0.657828	PTPRF	0	intronic	2.913	5	4	1
1	5	rs2819336	rs673253	T	C	44062154	0.4105	1.271e-10	6.431	0.742704	PTPRF	0	intronic	5.138	NA	4	1
1	5	rs2819336	rs673242	T	C	44062159	0.3539	1.975e-10	6.363	0.9433	PTPRF	0	intronic	3.586	NA	4	1
1	5	rs2819336	rs56175694	T	C	44065148	0.3539	2.303e-10	6.34	0.9433	PTPRF	0	intronic	6.505	5	1	1
1	5	rs2819336	rs596522	A	C	44066424	0.3539	2.377e-10	6.335	0.9433	PTPRF	0	intronic	0.964	5	4	1
1	5	rs2819336	rs492929	A	G	44068275	0.2813	8.139e-05	3.94	0.653963	PTPRF	0	intronic	13.82	5	3	1
1	5	rs2819336	rs17371903	A	G	44070691	0.3519	3.658e-10	-6.268	0.934026	PTPRF	0	intronic	8.464	5	4	1
1	5	rs11210871	rs631248	A	G	44071221	0.2624	7.223e-05	3.969	0.639894	PTPRF	0	exonic	10.84	5	4	1
1	5	rs11210871	rs539096	A	G	44072420	0.2575	2.111e-05	-4.253	0.609761	PTPRF	0	intronic	7.185	3a	4	1
1	5	rs11210871	rs519669	C	G	44075505	0.2575	2.489e-05	4.216	0.617381	PTPRF	0	intronic	1.967	5	4	1
1	5	rs11210871	rs11210887	A	G	44076019	0.336	4.709e-09	5.857	0.856926	PTPRF	0	intronic	17.11	6	4	1
1	5	rs11210871	rs549845	A	G	44076469	0.336	4.267e-09	5.874	0.856926	PTPRF	0	intronic	1.944	7	4	1
1	5	rs11210871	rs499257	T	C	44078384	0.3628	1.305e-07	-5.278	0.759658	PTPRF	0	intronic	7.578	5	4	1
1	5	rs2819336	rs3791151	A	C	44078602	0.326	8.419e-10	6.137	0.758351	PTPRF	0	intronic	8.28	5	4	1
1	5	rs11210871	rs603542	T	C	44079411	0.3618	1.193e-07	-5.295	0.75557	PTPRF	0	intronic	2.085	4	4	1
1	5	rs2819336	rs55684236	A	G	44080009	0.326	7.545e-10	6.154	0.758351	PTPRF	0	intronic	4.948	4	4	1
1	5	rs11210871	rs653953	A	G	44083015	0.3559	2.03e-07	5.197	0.728003	PTPRF	0	intronic	6.796	2b	4	1
1	5	rs11210871	rs1143702	T	C	44086831	0.3559	4.295e-07	5.055	0.728003	PTPRF	0	exonic	11.47	NA	4	1
1	5	rs2819336	rs12405972	T	G	44097438	0.3241	1.06e-09	6.1	0.751333	PTPRF	8095	intergenic	0.081	7	5	1
1	5	rs11210871	rs2970610	T	C	44097530	0.3618	2.171e-07	-5.184	0.75557	PTPRF	8187	intergenic	1.036	6	5	1
1	5	rs2819336	rs61769649	A	G	44098506	0.3241	1.063e-09	6.1	0.751333	PTPRF	9163	intergenic	0.368	7	5	1
1	5	rs11210871	rs11210892	A	G	44100084	0.3618	3.042e-07	5.121	0.75557	PTPRF	10741	intergenic	7.636	5	5	1
1	5	rs2819336	rs35393217	A	G	44101648	0.3241	1.765e-09	6.018	0.751333	PTPRF	12305	intergenic	0.13	4	5	1
1	5	rs2819336	rs35290231	A	G	44103033	0.3241	1.406e-09	6.055	0.751333	KDM4A	12796	intergenic	3.168	6	5	1
1	5	rs11210871	rs2367724	T	C	44107428	0.3588	1.227e-06	4.851	0.718255	KDM4A	8401	intergenic	1.518	6	5	1
1	5	rs11210871	rs607296	A	G	44109749	0.3598	6.873e-07	-4.965	0.715904	KDM4A	6080	intergenic	7.108	NA	5	1
1	5	rs2819336	rs55666439	T	G	44111212	0.3241	8.514e-10	-6.135	0.751333	KDM4A	4617	intergenic	6.641	5	5	1
1	5	rs2819336	rs61768370	A	T	44111963	0.3241	9.71e-10	-6.114	0.751333	KDM4A	3866	intergenic	0.486	7	5	1
1	5	rs2819336	rs517191	A	G	44116466	0.3241	1.84e-09	6.011	0.751333	KDM4A	0	intronic	4.066	4	1	1
1	5	rs2819336	rs660899	T	G	44117006	0.326	1.428e-09	6.052	0.742447	KDM4A	0	intronic	3.75	5	1	1
1	5	rs2819336	rs61768371	A	G	44118406	0.3241	1.701e-09	6.024	0.751333	KDM4A	0	intronic	0.988	7	1	1
1	5	rs58859557	rs112476957	T	C	44118644	0.07555	1.066e-06	4.879	0.704114	KDM4A	0	intronic	0.187	7	1	0
1	5	rs2819336	rs2274465	C	G	44121557	0.3241	1.438e-09	-6.051	0.751333	KDM4A	0	intronic	3.223	1f	4	1
1	5	rs2819336	rs11589584	T	G	44122473	0.3241	1.452e-09	-6.05	0.751333	KDM4A	0	intronic	0.023	7	4	1
1	5	rs2819336	rs61768372	T	C	44123988	0.3241	1.397e-09	6.056	0.751333	KDM4A	0	intronic	5.891	7	4	1
1	5	rs58859557	rs56072551	T	G	44124514	0.07654	1.381e-06	4.828	0.718655	KDM4A	0	intronic	0.357	6	4	0
1	5	rs2819336	rs11590619	C	G	44126709	0.3241	1.002e-09	6.109	0.751333	KDM4A	0	intronic	0.039	5	4	1
1	5	rs2819336	rs489319	T	C	44131794	0.3141	5.454e-11	6.558	0.759869	KDM4A	0	intronic	5.777	NA	4	1
1	5	rs2819336	rs618678	T	C	44133299	0.3161	5.85e-11	6.548	0.749588	KDM4A	0	intronic	6.135	NA	4	1
1	5	rs2819336	rs3791033	T	C	44134077	0.3121	3.347e-11	-6.63	0.767521	KDM4A	0	intronic	6.236	6	4	1
1	5	rs2819336	rs10789442	A	C	44140075	0.3161	3.559e-11	-6.621	0.756832	KDM4A	0	intronic	9.076	6	4	1
1	5	rs2819336	rs9787076	A	C	44141149	0.3121	3.816e-11	-6.611	0.767521	KDM4A	0	intronic	2.015	5	4	1
1	5	rs2819336	rs3791034	A	G	44145130	0.3141	6.731e-11	-6.527	0.758942	KDM4A	0	intronic	9.653	5	4	1
1	5	rs2819336	rs4660257	T	C	44148168	0.2942	1.701e-11	-6.73	0.694682	KDM4A	0	intronic	1.101	7	4	1
1	5	rs2819336	rs61768374	T	G	44151633	0.2942	1.548e-11	-6.743	0.694682	KDM4A	0	intronic	4.723	5	4	1
1	5	rs2819336	rs1971342	A	G	44152189	0.2942	1.269e-11	6.772	0.694682	KDM4A	0	intronic	3.591	7	4	1
1	5	rs2819336	rs11805774	A	G	44152715	0.2942	1.295e-11	6.769	0.694682	KDM4A	0	intronic	6.758	6	4	1
1	5	rs2819336	rs17401357	C	G	44153619	0.2942	1.135e-11	6.788	0.694682	KDM4A	0	intronic	5.047	5	4	1
1	5	rs2819336	rs3791035	C	G	44154479	0.2942	1.371e-11	6.761	0.694682	KDM4A	0	intronic	0.231	4	3	1
1	5	rs2819336	rs2270972	C	G	44158129	0.2942	1.333e-11	-6.765	0.694682	KDM4A	0	intronic	2.282	5	4	1
1	5	rs2819336	rs112984125	A	G	44173423	0.2913	1.27e-11	6.772	0.669735	KDM4A-AS1	0	ncRNA_intronic	10.02	2b	1	1
1	5	rs2906455	rs304300	T	G	44174793	0.1203	2.481e-06	-4.71	0.801872	ST3GAL3	0	intronic	11.62	5	1	1
1	5	rs2819336	rs17531412	A	G	44182244	0.2913	1.426e-11	-6.755	0.676489	RP11-184I16.4	0	ncRNA_intronic	0.537	4	1	1
1	5	rs2819336	rs112361411	T	C	44183923	0.2913	1.382e-11	6.76	0.676489	RP11-184I16.4	0	ncRNA_intronic	2.128	6	5	1
1	5	rs2819336	rs11810109	A	T	44186812	0.2913	9.999e-12	-6.807	0.676489	RP11-184I16.4	0	ncRNA_intronic	1.641	7	5	1
1	5	rs2819336	rs12410155	A	C	44188465	0.2913	1.865e-11	-6.716	0.676489	RP11-184I16.4	0	ncRNA_intronic	1.459	5	5	1
1	5	rs2819336	rs12410444	A	G	44188719	0.2913	1.368e-11	-6.761	0.676489	RP11-184I16.4	0	ncRNA_intronic	8.037	5	5	1
1	5	rs11577684	rs6429637	A	G	44198531	0.2992	5.491e-12	-6.892	0.676863	ST3GAL3	0	intronic	8.385	6	5	1
1	5	rs11577684	rs6673970	A	C	44199469	0.2992	7.526e-12	-6.847	0.676863	ST3GAL3	0	intronic	0.14	7	5	1
1	5	rs11577684	rs3791040	A	G	44202733	0.3042	1.329e-11	-6.765	0.662058	ST3GAL3	0	intronic	2.046	7	4	1
1	5	rs11577684	rs1013793	T	C	44207553	0.3032	1.571e-11	6.741	0.666777	ST3GAL3	0	intronic	16.51	NA	4	1
1	5	rs11577684	rs1029632	A	C	44207899	0.3032	1.454e-11	6.752	0.666777	ST3GAL3	0	intronic	5.069	NA	4	1
1	5	rs11577684	rs1472661	T	C	44209075	0.3032	1.429e-11	6.755	0.666777	ST3GAL3	0	intronic	1.503	NA	4	1
1	5	rs11577684	rs59305903	T	C	44210191	0.3032	9.246e-12	6.818	0.666777	ST3GAL3	0	intronic	0.312	6	4	1
1	5	rs11577684	rs6696529	A	T	44210387	0.3062	1.633e-11	6.736	0.652695	ST3GAL3	0	intronic	8.679	6	4	1
1	5	rs11577684	rs112646031	C	G	44213051	0.2972	8.47e-12	-6.83	0.685466	ST3GAL3	0	intronic	0.783	6	4	1
1	5	rs11577684	rs7551551	A	C	44213482	0.2972	8.535e-12	6.829	0.685466	ST3GAL3	0	intronic	5.858	3a	4	1
1	5	rs11577684	rs7511800	A	T	44214269	0.2952	5.358e-12	-6.896	0.693254	ST3GAL3	0	intronic	0.246	6	4	0
1	5	rs11577684	rs56338811	A	G	44214888	0.3032	1.612e-11	-6.737	0.666777	ST3GAL3	0	intronic	3.449	7	4	1
1	5	rs11577684	rs56367078	T	G	44215015	0.3032	1.424e-11	6.755	0.666777	ST3GAL3	0	intronic	0.889	6	4	1
1	5	rs11577684	rs56701980	T	C	44215412	0.3032	1.632e-11	-6.736	0.666777	ST3GAL3	0	intronic	6.94	5	4	1
1	5	rs11577684	rs12062824	A	G	44215859	0.3032	1.546e-11	-6.743	0.666777	ST3GAL3	0	intronic	2.239	4	4	1
1	5	rs11577684	rs6668616	T	C	44216376	0.3032	1.567e-11	-6.742	0.666777	ST3GAL3	0	intronic	4.332	5	5	1
1	5	rs11577684	rs11584382	T	C	44216634	0.2992	1.051e-11	6.799	0.676863	ST3GAL3	0	intronic	1.65	7	5	1
1	5	rs11577684	rs6700256	A	G	44216887	0.3032	1.568e-11	6.742	0.666777	ST3GAL3	0	intronic	1.403	7	5	1
1	5	rs11577684	rs6429639	A	G	44217753	0.3032	1.418e-11	6.756	0.666777	ST3GAL3	0	intronic	2.97	7	4	1
1	5	rs11577684	rs3791043	T	G	44219546	0.3032	1.419e-11	6.756	0.666777	ST3GAL3	0	intronic	1.312	7	4	1
1	5	rs11577684	rs3791044	A	G	44219933	0.2972	7.566e-12	6.847	0.685466	ST3GAL3	0	intronic	0.088	7	4	1
1	5	rs11577684	rs6678767	A	G	44220670	0.3032	1.536e-11	6.745	0.666777	ST3GAL3	0	intronic	2.638	7	5	1
1	5	rs11577684	rs11210912	T	G	44220737	0.3032	1.464e-11	-6.751	0.666777	ST3GAL3	0	intronic	6.948	6	5	1
1	5	rs11577684	rs11581514	A	G	44222204	0.3032	1.385e-11	-6.759	0.666777	ST3GAL3	0	intronic	3.16	6	5	1
1	5	rs11577684	rs11587515	T	C	44222570	0.2992	9.038e-12	6.821	0.676863	ST3GAL3	0	intronic	4.389	7	5	1
1	5	rs11577684	rs11210914	T	C	44223456	0.3032	1.314e-11	-6.767	0.666777	ST3GAL3	0	intronic	0.032	4	2	1
1	5	rs11577684	rs112518613	T	C	44224985	0.3032	1.63e-11	-6.736	0.666777	ST3GAL3	0	intronic	1.243	6	5	1
1	5	rs11577684	rs6664485	T	C	44225532	0.3032	1.512e-11	-6.747	0.666777	ST3GAL3	0	intronic	0.259	7	5	1
1	5	rs11577684	rs7520053	A	G	44226657	0.3002	8.765e-12	-6.825	0.673229	ST3GAL3	0	intronic	8.619	2b	5	1
1	5	rs11577684	rs7551644	A	T	44228016	0.3042	1.222e-11	-6.778	0.663294	ST3GAL3	0	intronic	0.646	7	5	1
1	5	rs11577684	rs56352978	A	G	44231480	0.2962	NA	NA	0.681307	ST3GAL3	0	intronic	2.241	5	2	1
1	5	rs11577684	rs56009633	C	T	44231481	0.3012	NA	NA	0.683038	ST3GAL3	0	intronic	2.946	5	2	1
1	5	rs11577684	rs3791046	A	C	44231807	0.2992	1.905e-11	6.713	0.676863	ST3GAL3	0	intronic	5.045	4	2	1
1	5	rs11577684	rs11210916	A	G	44232926	0.2992	2.074e-11	6.701	0.676863	ST3GAL3	0	intronic	2.418	2b	2	1
1	5	rs11577684	rs6656457	C	G	44233662	0.3032	1.834e-11	6.719	0.666777	ST3GAL3	0	intronic	0.116	7	5	1
1	5	rs11577684	rs4660745	T	C	44234076	0.3032	2.642e-11	6.665	0.666777	ST3GAL3	0	intronic	3.89	7	5	1
1	5	rs11577684	rs11210917	A	T	44234520	0.3032	2.602e-11	6.667	0.666777	ST3GAL3	0	intronic	8.371	5	5	1
1	5	rs11577684	rs3791047	A	G	44236114	0.3012	2.106e-11	-6.698	0.675126	ST3GAL3	0	intronic	2.461	6	5	1
1	5	rs11577684	rs7531165	T	C	44237247	0.3012	2.254e-11	6.689	0.675126	ST3GAL3	0	intronic	3.461	7	5	1
1	5	rs11577684	rs7516647	T	C	44237465	0.2972	1.657e-11	6.733	0.685466	ST3GAL3	0	intronic	3.708	7	5	1
1	5	rs11577684	rs10890280	A	G	44238218	0.3012	2.768e-11	-6.658	0.675126	ST3GAL3	0	intronic	0.929	7	4	1
1	5	rs11577684	rs7529895	T	C	44241870	0.2962	2.145e-11	6.696	0.690378	ST3GAL3	0	intronic	1.764	3a	4	1
1	5	rs11577684	rs61768432	A	T	44243561	0.3002	2.639e-11	-6.665	0.679939	ST3GAL3	0	intronic	1.389	7	5	1
1	5	rs11577684	rs55695044	T	C	44243658	0.3002	2.614e-11	6.667	0.679939	ST3GAL3	0	intronic	0.449	7	4	1
1	5	rs11577684	rs11590279	T	C	44244183	0.2962	2.139e-11	6.696	0.690378	ST3GAL3	0	intronic	4.225	5	4	1
1	5	rs11577684	rs2158954	A	G	44244667	0.3002	2.598e-11	6.668	0.679939	ST3GAL3	0	intronic	4.357	NA	4	1
1	5	rs11577684	rs12083110	T	C	44245049	0.3002	2.546e-11	-6.671	0.679939	ST3GAL3	0	intronic	0.519	2b	2	1
1	5	rs11577684	rs10890281	A	C	44245939	0.3002	3.182e-11	6.638	0.679939	ST3GAL3	0	intronic	9.53	5	4	1
1	5	rs2906455	rs6680338	A	G	44246356	0.1103	2.127e-07	5.188	0.907792	ST3GAL3	0	intronic	0.737	5	5	1
1	5	rs11577684	rs12354267	T	C	44248272	0.3012	8.251e-11	-6.496	0.68417	ST3GAL3	0	intronic	3.139	5	5	1
1	5	rs11577684	rs12760274	A	G	44249344	0.3181	7.464e-06	-4.48	0.781471	ST3GAL3	0	intronic	9.349	3a	2	1
1	5	rs2906455	rs917293	A	G	44249916	0.1143	2.778e-08	5.555	0.910336	ST3GAL3	0	intronic	1.081	NA	5	1
1	5	rs2906455	rs4660749	T	G	44250301	0.1123	2.587e-08	-5.567	0.929226	ST3GAL3	0	intronic	4.46	5	5	1
1	5	rs2906455	rs4660750	T	C	44250381	0.1123	2.519e-08	-5.572	0.929226	ST3GAL3	0	intronic	4.65	5	5	1
1	5	rs11577684	rs35025013	T	G	44250787	0.2863	NA	NA	0.726567	ST3GAL3	0	intronic	8.159	5	5	0
1	5	rs246776	rs3828139	T	C	44253015	0.4881	3.893e-08	5.496	0.967122	ST3GAL3	0	intronic	11.57	4	2	1
1	5	rs11577684	rs11577684	C	G	44254280	0.3479	7.753e-09	-5.774	1	ST3GAL3	0	intronic	1.674	5	5	1
1	5	rs2906455	rs6691988	A	G	44254402	0.1173	3.589e-08	5.51	0.884732	ST3GAL3	0	intronic	0.367	5	5	1
1	5	rs11577684	rs9787240	A	G	44256468	0.341	1.078e-08	-5.718	0.968113	ST3GAL3	0	intronic	8.75	6	5	1
1	5	rs2906455	rs1354261	A	C	44256682	0.1173	7.293e-08	-5.384	0.884732	ST3GAL3	0	intronic	9.046	NA	5	1
1	5	rs2906455	rs1502907	A	G	44258040	0.1123	5.565e-08	-5.432	0.929226	ST3GAL3	0	intronic	5.194	NA	4	1
1	5	rs11577684	rs34224911	A	T	44258341	0.3459	1.126e-08	-5.711	0.9908	ST3GAL3	0	intronic	8.932	4	4	1
1	5	rs246776	rs6688144	A	G	44258931	0.3996	0.02206	-2.289	0.611067	ST3GAL3	0	intronic	4.263	5	4	1
1	5	rs11577684	rs12401813	A	C	44263415	0.3459	1.048e-08	-5.723	0.9908	ST3GAL3	0	intronic	9.619	7	2	1
1	5	rs2906455	rs3791055	T	C	44265655	0.1123	5.41e-08	-5.437	0.929226	ST3GAL3	0	intronic	5.04	5	2	1
1	5	rs2906455	rs9726489	G	C	44267668	0.1123	NA	NA	0.929226	ST3GAL3	0	intronic	0.879	6	4	0
1	5	rs246776	rs3791057	T	C	44268012	0.3996	0.02445	2.25	0.611067	ST3GAL3	0	intronic	12.75	5	4	1
1	5	rs2906455	rs11210928	T	C	44268219	0.1153	5.65e-08	5.43	0.90249	ST3GAL3	0	intronic	1.841	5	4	1
1	5	rs246776	rs6672795	T	C	44268699	0.3996	0.02715	2.209	0.611067	ST3GAL3	0	intronic	2.041	6	4	1
1	5	rs246776	rs12024345	A	T	44269187	0.4831	3.674e-08	5.506	0.987597	ST3GAL3	0	intronic	6.376	7	4	1
1	5	rs2906455	rs6670344	A	G	44269208	0.1123	5.786e-08	-5.425	0.929226	ST3GAL3	0	intronic	2.544	6	4	1
1	5	rs246776	rs3791058	T	C	44270310	0.3996	0.02752	2.204	0.611067	ST3GAL3	0	intronic	4.928	5	4	1
1	5	rs246776	rs11580676	A	G	44272529	0.3986	0.0325	-2.138	0.600332	ST3GAL3	0	intronic	0.797	7	4	1
1	5	rs2906455	rs246778	T	C	44272761	0.1123	3.447e-08	-5.517	0.909411	ST3GAL3	0	intronic	0.251	NA	4	1
1	5	rs246776	rs12126352	A	G	44273197	0.3986	0.03206	-2.144	0.600332	ST3GAL3	0	intronic	0.265	5	4	1
1	5	rs2906455	rs246777	C	G	44274434	0.1163	3.81e-08	5.499	0.912776	ST3GAL3	0	intronic	5.364	1f	4	1
1	5	rs246776	rs246776	T	C	44274699	0.4801	2.73e-08	5.558	1	ST3GAL3	0	intronic	1.914	NA	4	1
1	5	rs246776	rs12122867	A	G	44275441	0.3986	0.02826	-2.194	0.600332	ST3GAL3	0	intronic	1.708	6	4	1
1	5	rs2906455	rs246775	T	C	44275595	0.1163	1.342e-07	-5.273	0.912776	ST3GAL3	0	intronic	0.932	NA	4	1
1	5	rs246776	rs3791059	T	C	44276062	0.3986	0.0354	-2.104	0.600332	ST3GAL3	0	intronic	0.547	7	4	1
1	5	rs246776	rs1012125	T	C	44277099	0.3986	0.03269	2.136	0.600332	ST3GAL3	0	intronic	2.905	NA	4	1
1	5	rs11577684	rs37471	T	C	44277548	0.3449	2.994e-08	5.542	0.967769	ST3GAL3	0	intronic	1.829	NA	4	1
1	5	rs246776	rs12125838	A	G	44277600	0.3986	0.03777	-2.077	0.600332	ST3GAL3	0	intronic	1.039	7	4	1
1	5	rs246776	rs12133508	T	C	44277746	0.3986	0.03455	-2.114	0.600332	ST3GAL3	0	intronic	3.238	6	4	1
1	5	rs11577684	rs37470	C	G	44277948	0.3449	2.366e-08	5.583	0.967769	ST3GAL3	0	intronic	0.871	5	4	1
1	5	rs246776	rs37469	A	G	44278722	0.4831	6.456e-08	5.406	0.987428	ST3GAL3	0	intronic	7.2	NA	5	1
1	5	rs246776	rs3791062	C	G	44279223	0.3986	0.03945	-2.059	0.600332	ST3GAL3	0	intronic	0.407	4	5	1
1	5	rs246776	rs3791063	T	C	44279711	0.3986	0.03517	2.106	0.600332	ST3GAL3	0	intronic	16.37	7	5	1
1	5	rs2906455	rs37468	A	T	44280381	0.1133	2.122e-08	-5.602	0.939574	ST3GAL3	0	intronic	8.768	1f	4	1
1	5	rs246776	rs3791064	T	G	44280425	0.3986	0.03624	2.094	0.600332	ST3GAL3	0	intronic	6.117	5	4	1
1	5	rs246776	rs972444	A	G	44282204	0.3986	0.03731	-2.082	0.600332	ST3GAL3	0	intronic	5.482	NA	4	1
1	5	rs246776	rs972443	T	C	44282355	0.3986	0.0346	2.113	0.600332	ST3GAL3	0	intronic	4.178	NA	4	1
1	5	rs2906455	rs37466	T	C	44283071	0.1143	NA	NA	0.93005	ST3GAL3	0	intronic	0.422	NA	4	0
1	5	rs246776	rs37465	C	T	44283272	0.4771	NA	NA	0.92013	ST3GAL3	0	intronic	1.994	5	4	0
1	5	rs2906455	rs541487	A	G	44283909	0.1143	1.647e-08	5.646	0.93005	ST3GAL3	0	intronic	5.397	NA	4	1
1	5	rs2906455	rs37464	A	G	44284161	0.1143	1.793e-08	-5.631	0.93005	ST3GAL3	0	intronic	2.769	NA	4	1
1	5	rs246776	rs37463	A	G	44284348	0.4871	5.475e-08	5.435	0.962651	ST3GAL3	0	intronic	2.619	NA	4	1
1	5	rs2906455	rs37462	T	C	44284778	0.1133	1.715e-08	5.639	0.939574	ST3GAL3	0	intronic	0.257	NA	4	1
1	5	rs2906455	rs39722	C	G	44285663	0.1133	1.472e-08	5.665	0.939574	ST3GAL3	0	intronic	0.941	6	4	1
1	5	rs246776	rs3791067	C	G	44286932	0.4881	6.291e-08	5.41	0.958693	ST3GAL3	0	intronic	0.131	6	4	1
1	5	rs2906455	rs641356	T	C	44287186	0.1133	1.188e-08	5.701	0.939574	ST3GAL3	0	intronic	1.558	NA	4	1
1	5	rs2906455	rs556667	T	G	44287414	0.1133	1.315e-08	5.684	0.939574	ST3GAL3	0	intronic	4.999	1f	4	1
1	5	rs246776	rs12741189	A	C	44287943	0.3986	0.04207	2.033	0.600332	ST3GAL3	0	intronic	1.78	3a	2	1
1	5	rs246776	rs37460	C	G	44288364	0.4881	5.671e-08	-5.429	0.958693	ST3GAL3	0	intronic	7.349	NA	2	1
1	5	rs246776	rs12131981	A	G	44289080	0.3986	0.03943	-2.06	0.600332	ST3GAL3	0	intronic	5.796	7	4	1
1	5	rs11577684	rs37459	A	G	44289397	0.3449	2.797e-08	-5.554	0.967769	ST3GAL3	0	intronic	1.366	7	5	1
1	5	rs11577684	rs37458	A	G	44290530	0.3459	2.11e-08	-5.603	0.963202	ST3GAL3	0	exonic	0.001	NA	4	1
1	5	rs2906455	rs37457	A	G	44291191	0.1133	1.155e-08	5.706	0.939574	ST3GAL3	0	intronic	7.985	NA	4	1
1	5	rs11577684	rs37456	T	C	44292989	0.3449	2.355e-08	5.584	0.967769	ST3GAL3	0	intronic	1.719	NA	4	1
1	5	rs11577684	rs37455	A	G	44294228	0.3459	2.232e-08	-5.593	0.963202	ST3GAL3	0	intronic	15.79	NA	4	1
1	5	rs11577684	rs37454	A	C	44294411	0.3459	2.268e-08	5.59	0.96312	ST3GAL3	0	intronic	1.669	NA	4	1
1	5	rs246776	rs11580407	A	T	44294920	0.3986	0.04006	-2.053	0.600332	ST3GAL3	0	intronic	4.023	6	5	1
1	5	rs11577684	rs37453	A	G	44295047	0.3449	2.113e-08	-5.602	0.967769	ST3GAL3	0	intronic	3.152	7	5	1
1	5	rs2906455	rs42962	A	C	44298564	0.1103	3.347e-08	-5.522	0.948741	ST3GAL3	0	intronic	0.737	NA	2	1
1	5	rs2906455	rs246774	T	C	44299695	0.1093	6.722e-09	5.798	0.958744	ST3GAL3	0	intronic	1.809	NA	2	1
1	5	rs2906455	rs246773	A	G	44300249	0.1103	4.797e-09	-5.854	0.969095	ST3GAL3	0	intronic	2.162	NA	1	1
1	5	rs2906455	rs3011218	A	T	44303329	0.1113	2.017e-09	5.996	0.959093	ST3GAL3	0	intronic	5.092	5	5	1
1	5	rs2906455	rs2906470	T	C	44306559	0.1093	4.549e-09	-5.863	0.979263	ST3GAL3	0	intronic	1.357	NA	4	1
1	5	rs2906455	rs3011221	A	G	44312109	0.1103	4.933e-09	-5.849	0.969095	ST3GAL3	0	intronic	0.323	7	5	1
1	5	rs2906455	rs2906467	A	C	44320476	0.1083	3.835e-09	5.891	0.989603	ST3GAL3	0	intronic	5.864	NA	4	1
1	5	rs2906455	rs3124746	C	G	44320934	0.1083	3.984e-09	5.885	0.989603	ST3GAL3	0	intronic	0.08	6	4	1
1	5	rs2906455	rs12760568	C	T	44323254	0.1282	NA	NA	0.804823	ST3GAL3	0	intronic	0.211	3b	4	0
1	5	rs2906455	rs7417507	C	T	44323258	0.1282	NA	NA	0.804823	ST3GAL3	0	intronic	1.434	3b	4	1
1	5	rs2906455	rs2906465	T	C	44323736	0.1083	3.568e-09	-5.903	0.989603	ST3GAL3	0	intronic	3.037	NA	4	1
1	5	rs2906455	rs3011226	A	G	44324060	0.1083	3.566e-09	5.903	0.989603	ST3GAL3	0	intronic	5.082	4	2	1
1	5	rs2906455	rs3011227	A	G	44325409	0.1093	3.185e-09	5.922	0.979263	ST3GAL3	0	intronic	4.612	5	4	1
1	5	rs2906455	rs3011229	A	G	44328017	0.1093	3.934e-09	-5.887	0.979263	ST3GAL3	0	intronic	2.557	5	4	1
1	5	rs2906455	rs2906464	T	C	44329803	0.1083	3.842e-09	5.891	0.989603	ST3GAL3	0	intronic	0.605	NA	4	1
1	5	rs2906455	rs2906463	A	G	44330048	0.1093	3.787e-09	-5.893	0.979263	ST3GAL3	0	intronic	0.626	NA	5	1
1	5	rs2906455	rs2906462	A	G	44332084	0.1093	4.154e-09	5.878	0.979263	ST3GAL3	0	intronic	4.399	NA	5	1
1	5	rs2906455	rs2906461	C	G	44334228	0.1083	4.327e-09	5.871	0.989603	ST3GAL3	0	intronic	0.773	5	2	1
1	5	rs2906455	rs2906460	A	G	44335323	0.1093	4.238e-09	-5.875	0.979263	ST3GAL3	0	intronic	0.62	NA	4	1
1	5	rs2906455	rs2906459	A	C	44335657	0.1093	4.205e-09	-5.876	0.979263	ST3GAL3	0	intronic	2.612	NA	4	1
1	5	rs2906455	rs3011230	T	G	44340655	0.1093	4.653e-09	5.859	1	ST3GAL3	0	intronic	0.575	1f	5	1
1	5	rs2906455	rs2906456	T	C	44340920	0.1093	3.061e-09	-5.928	1	ST3GAL3	0	intronic	2.137	NA	5	1
1	5	rs2906455	rs2906455	T	C	44341895	0.1093	7.597e-10	-6.153	1	ST3GAL3	0	intronic	2.283	NA	4	1
1	5	rs2906455	rs3011231	A	G	44342235	0.1093	4.538e-09	-5.863	1	ST3GAL3	0	intronic	0.908	5	4	1
1	5	rs2906455	rs3791097	C	G	44349381	0.1093	5.223e-09	-5.84	1	ST3GAL3	0	intronic	8.475	2b	4	1
1	5	rs2906455	rs17474535	A	G	44353084	0.1093	4.435e-09	5.867	1	ST3GAL3	0	intronic	0.505	5	5	1
1	5	rs2906455	rs61770286	A	G	44356609	0.1093	5.053e-09	5.845	1	ST3GAL3	0	intronic	0.443	4	5	1
1	5	rs2906455	rs61770287	T	C	44359205	0.1093	5.385e-09	-5.835	1	ST3GAL3	0	intronic	10.23	5	4	1
1	5	rs2906455	rs17533707	T	C	44361533	0.1093	4.025e-09	-5.883	1	ST3GAL3	0	intronic	1.282	7	4	1
1	5	rs2906455	rs61770289	T	C	44363710	0.1093	3.886e-09	5.889	1	ST3GAL3	0	intronic	3.936	NA	4	1
1	5	rs2906455	rs783304	A	G	44365457	0.1501	0.001398	3.195	0.697407	ST3GAL3	0	intronic	4.099	4	4	1
1	5	rs11577684	rs3791101	A	G	44366250	0.2982	3.383e-05	4.146	0.631565	ST3GAL3	0	intronic	17.1	5	4	1
1	5	rs2906455	rs783301	T	C	44369009	0.1103	6.132e-09	-5.813	0.989664	ST3GAL3	0	intronic	6.234	NA	4	1
1	5	rs2906455	rs2485995	A	G	44369600	0.1103	6.095e-09	-5.814	0.989664	ST3GAL3	0	intronic	2.44	NA	4	1
1	5	rs2906455	rs148773406	A	G	44371107	0.1093	NA	NA	0.958744	ST3GAL3	0	intronic	1.708	3a	5	1
1	5	rs2906455	rs147671612	T	C	44371437	0.1044	NA	NA	0.886928	ST3GAL3	0	intronic	3.523	5	5	1
1	5	rs2906455	rs142328051	C	T	44371441	0.1044	NA	NA	0.886928	ST3GAL3	0	intronic	1.915	5	5	1
1	5	rs2906455	rs2906598	G	C	44372290	0.1103	NA	NA	0.969095	ST3GAL3	0	intronic	1.232	3a	4	1
1	5	rs2906455	rs2993621	C	T	44372291	0.1103	NA	NA	0.969095	ST3GAL3	0	intronic	0.228	3a	4	1
1	5	rs2906455	rs2486012	A	G	44373409	0.1103	4.999e-09	5.847	0.969095	ST3GAL3	0	intronic	0.249	NA	4	1
1	5	rs2906455	rs2428963	T	C	44373439	0.1103	3.339e-09	-5.914	0.969095	ST3GAL3	0	intronic	1.682	NA	4	1
1	5	rs2906455	rs2248305	T	C	44379493	0.1103	5.011e-09	-5.847	0.969095	ST3GAL3	0	intronic	3.282	5	2	1
1	5	rs2906455	rs1859725	A	G	44379577	0.1103	4.647e-09	5.859	0.969095	ST3GAL3	0	intronic	2.466	5	2	1
1	5	rs2906455	rs1766964	T	C	44381847	0.1113	5.194e-09	5.841	0.959093	ST3GAL3	0	intronic	0.952	NA	2	1
1	5	rs2906455	rs1766966	A	G	44382515	0.1123	4.291e-09	5.873	0.949254	ST3GAL3	0	intronic	0.485	NA	1	1
1	5	rs2906455	rs61770291	G	A	44383123	0.1103	NA	NA	0.948256	ST3GAL3	0	intronic	5.167	6	5	1
1	5	rs11577684	rs4660756	T	C	44383914	0.2972	1.502e-05	4.328	0.603762	ST3GAL3	0	intronic	0.112	7	5	1
1	5	rs2906455	rs1636877	A	G	44387625	0.1103	1.698e-09	-6.024	0.948256	ST3GAL3	0	intronic	3.73	4	4	1
1	5	rs2906455	rs2245439	T	C	44389959	0.1103	2.825e-09	-5.941	0.948256	ST3GAL3	0	intronic	2.298	1f	4	1
1	5	rs2906455	rs2485991	T	C	44391722	0.1123	2.553e-09	5.958	0.928433	ST3GAL3	0	intronic	0.346	NA	4	1
1	5	rs2906455	rs2428961	T	C	44392921	0.1113	3.123e-09	-5.925	0.938262	ST3GAL3	0	intronic	0.188	NA	4	1
1	5	rs2906455	rs2428960	A	G	44393146	0.1113	3.242e-09	5.919	0.938262	ST3GAL3	0	intronic	4.456	NA	4	1
1	5	rs2906455	rs2428959	T	C	44395224	0.1113	3.609e-09	-5.901	0.938262	ST3GAL3	0	intronic	3.637	NA	4	1
1	5	rs2906455	rs1859726	T	C	44396215	0.1123	2.731e-09	5.947	0.928433	ST3GAL3	0	UTR3	14.11	1f	4	1
1	5	rs2906455	rs2485990	A	G	44396790	0.1123	2.625e-09	-5.953	0.928433	ST3GAL3	0	UTR3	0.978	NA	2	1
1	5	rs2906455	rs1548634	T	C	44399608	0.1123	1.844e-09	6.011	0.928433	ARTN	0	intronic	13.16	4	1	1
1	5	rs2906455	rs1766968	T	C	44403042	0.1103	2.439e-09	5.965	0.907792	ARTN	0	downstream	3.775	NA	2	1
1	5	rs2906455	rs3120804	T	G	44405214	0.1103	3.4e-09	5.911	0.907792	ARTN	2301	intergenic	8.845	2b	5	1
1	5	rs2906455	rs3120805	T	C	44406113	0.1103	3.255e-09	-5.918	0.907792	ARTN	3200	intergenic	8.058	6	5	1
1	5	rs2906455	rs2906597	A	G	44406725	0.1103	3.074e-09	5.928	0.907792	ENSG00000237950	3317	intergenic	3.888	NA	5	1
1	5	rs2906455	rs2485989	T	C	44408454	0.1083	3.045e-09	5.929	0.907371	ENSG00000237950	1588	intergenic	3.533	NA	4	1
1	5	rs2906455	rs2428957	A	G	44409048	0.1093	1.898e-09	6.006	0.897548	ENSG00000237950	0	downstream	0.742	NA	4	1
1	5	rs2906455	rs2486014	T	C	44419546	0.1093	6.411e-09	5.806	0.877701	IPO13	0	intronic	5.048	NA	2	1
1	5	rs2906455	rs1008137	T	C	44420754	0.1093	9.254e-09	-5.744	0.877701	IPO13	0	intronic	5.082	1f	4	1
1	5	rs2906455	rs1636879	C	G	44428680	0.1093	7.611e-09	-5.777	0.877701	IPO13	0	intronic	3.836	4	4	1
1	5	rs2906455	rs2486007	A	G	44434613	0.1083	8.225e-09	5.764	0.867563	IPO13	0	downstream	2.795	5	4	1
1	5	rs2906455	rs783308	A	C	44438396	0.1531	0.0005139	3.473	0.602928	DPH2	0	UTR3	2.486	5	3	1
1	5	rs2906455	rs4221	A	G	44438961	0.1531	0.0005018	3.48	0.602928	DPH2	0	UTR3	8.569	NA	1	1
1	5	rs2906455	rs2428954	A	G	44442930	0.1183	2.356e-08	5.584	0.79766	ATP6V0B	0	exonic	7.1	NA	3	1
1	5	rs2906455	rs2428953	A	G	44443459	0.1173	7.483e-09	-5.78	0.787607	ATP6V0B	0	UTR3	0.297	NA	3	1
1	5	rs2906455	rs2231283	G	C	44450737	0.1093	NA	NA	0.877701	B4GALT2	0	intronic	0.537	5	3	1
1	5	rs2906455	rs2993619	T	C	44455203	0.1193	7.166e-08	-5.387	0.735808	B4GALT2	0	intronic	0.182	2b	5	1
1	5	rs2906455	rs803619	T	C	44465419	0.1223	1.015e-05	-4.414	0.641163	SLC6A9	0	intronic	1.422	5	4	1
1	6	rs2420551	rs861252	A	C	69237163	0.1054	5.348e-07	-5.013	0.600315	RP4-694A7.4	232853	intergenic	3.914	NA	9	0
1	6	rs2420551	rs854270	T	C	69245272	0.1054	5.25e-07	-5.017	0.600315	RP4-694A7.4	240962	intergenic	3.415	NA	5	0
1	6	rs2420551	rs11579356	A	G	69292081	0.0994	6.437e-07	4.978	0.640794	RP11-424D14.1	229500	intergenic	9.623	7	5	0
1	6	rs2420551	rs955842	T	C	69295023	0.1014	1.449e-06	-4.818	0.642557	RP11-424D14.1	226558	intergenic	4.553	NA	9	0
1	6	rs2420551	rs955841	A	G	69295070	0.09841	5.781e-07	-4.998	0.631329	RP11-424D14.1	226511	intergenic	2.376	NA	9	0
1	6	rs2420551	rs6671981	A	G	69298988	0.1014	1.736e-06	4.782	0.642557	RP11-424D14.1	222593	intergenic	15.61	6	9	0
1	6	rs2420551	rs6672072	A	G	69299046	0.1014	1.912e-06	4.763	0.642557	RP11-424D14.1	222535	intergenic	3.521	6	9	0
1	6	rs2420551	rs34599182	T	C	69301219	0.0994	7.88e-07	4.938	0.640794	RP11-424D14.1	220362	intergenic	0.822	7	9	0
1	6	rs2420551	rs11589397	T	C	69302144	0.09841	6.568e-07	4.974	0.631329	RP11-424D14.1	219437	intergenic	1.206	6	9	0
1	6	rs2420551	rs17488264	T	C	69302771	0.09841	5.344e-07	-5.014	0.631329	RP11-424D14.1	218810	intergenic	2.632	5	9	0
1	6	rs2420551	rs2131125	T	C	69303617	0.0994	5.795e-06	-4.534	0.672807	RP11-424D14.1	217964	intergenic	0.661	6	9	0
1	6	rs2420551	rs11209356	C	G	69304252	0.09742	2.376e-06	-4.718	0.67145	RP11-424D14.1	217329	intergenic	2.653	7	9	0
1	6	rs2420551	rs11209357	A	G	69306780	0.1044	1.45e-07	5.259	0.72181	RP11-424D14.1	214801	intergenic	0.508	6	9	0
1	6	rs2420551	rs57887245	T	C	69309391	0.1044	1.522e-07	-5.25	0.72181	RP11-424D14.1	212190	intergenic	0.1	6	9	0
1	6	rs2420551	rs1388650	C	G	69310422	0.1034	1.143e-07	5.302	0.711909	RP11-424D14.1	211159	intergenic	1.93	7	9	0
1	6	rs2420551	rs72680446	A	C	69310692	0.1034	1.192e-07	-5.295	0.711909	RP11-424D14.1	210889	intergenic	0.519	6	9	0
1	6	rs2420551	rs4145632	A	T	69312383	0.1064	3.465e-07	-5.096	0.72349	RP11-424D14.1	209198	intergenic	11.3	6	9	0
1	6	rs2420551	rs9988609	A	G	69315228	0.1064	3.62e-07	5.088	0.72349	RP11-424D14.1	206353	intergenic	0.4	6	5	0
1	6	rs2420551	rs115699118	A	G	69316628	0.1024	1.876e-07	5.211	0.720293	RP11-424D14.1	204953	intergenic	5.71	6	9	0
1	6	rs2420551	rs1844945	T	C	69318202	0.1054	3.675e-07	-5.085	0.731763	RP11-424D14.1	203379	intergenic	0.266	7	9	0
1	6	rs2420551	rs1826357	T	G	69318536	0.1054	4.026e-07	-5.068	0.731763	RP11-424D14.1	203045	intergenic	8.763	6	9	0
1	6	rs2420551	rs12081058	T	G	69318871	0.1044	2.77e-07	5.138	0.740181	RP11-424D14.1	202710	intergenic	0.063	7	9	0
1	6	rs2420551	rs12092194	A	G	69318950	0.1044	2.118e-07	-5.189	0.740181	RP11-424D14.1	202631	intergenic	2.566	7	9	0
1	6	rs2420551	rs1586834	A	G	69319269	0.1044	3.032e-07	5.121	0.72181	RP11-424D14.1	202312	intergenic	3.162	7	9	0
1	6	rs2420551	rs7414744	T	C	69323222	0.1024	2.6e-07	5.15	0.720293	RP11-424D14.1	198359	intergenic	3.268	6	5	0
1	6	rs2420551	rs11589723	T	C	69328993	0.1054	1.53e-07	-5.249	0.905015	RP11-424D14.1	192588	intergenic	1.638	7	9	0
1	6	rs2420551	rs56197584	T	C	69329184	0.1054	1.722e-07	5.227	0.905015	RP11-424D14.1	192397	intergenic	2.121	7	9	0
1	6	rs2420551	rs55695883	T	C	69329661	0.1054	2.165e-07	5.185	0.905015	RP11-424D14.1	191920	intergenic	2.423	6	9	0
1	6	rs2420551	rs139380747	T	C	69331103	0.1064	2.461e-07	5.161	0.915627	RP11-424D14.1	190478	intergenic	0.276	7	9	0
1	6	rs2420551	rs7552964	A	T	69331299	0.1054	2.2e-07	5.182	0.905015	RP11-424D14.1	190282	intergenic	3.778	7	9	0
1	6	rs2420551	rs7518408	A	C	69331338	0.1054	2.315e-07	-5.172	0.905015	RP11-424D14.1	190243	intergenic	4.756	7	9	0
1	6	rs2420551	rs7541414	T	C	69331574	0.1064	NA	NA	0.915627	RP11-424D14.1	190007	intergenic	1.301	7	9	0
1	6	rs2420551	rs72680454	T	G	69332219	0.1074	1.305e-07	-5.278	0.905699	RP11-424D14.1	189362	intergenic	2.094	6	9	0
1	6	rs2420551	rs72680455	T	C	69332220	0.1074	1.4e-07	-5.265	0.905699	RP11-424D14.1	189361	intergenic	0.035	6	9	0
1	6	rs2420551	rs12240114	C	G	69332409	0.1083	2.44e-07	5.162	0.916361	RP11-424D14.1	189172	intergenic	0.195	7	9	0
1	6	rs2420551	rs9436416	A	T	69332567	0.1083	3.311e-07	-5.105	0.916361	RP11-424D14.1	189014	intergenic	1.93	6	9	0
1	6	rs2420551	rs72680457	A	G	69332670	0.1064	2.032e-07	-5.196	0.915627	RP11-424D14.1	188911	intergenic	1.038	7	9	0
1	6	rs2420551	rs72680458	A	G	69332742	0.1074	2.254e-07	-5.177	0.906753	RP11-424D14.1	188839	intergenic	0.291	7	9	0
1	6	rs2420551	rs11582472	T	C	69333268	0.1064	2.395e-07	5.166	0.915627	RP11-424D14.1	188313	intergenic	1.808	7	9	0
1	6	rs2420551	rs11577312	T	C	69334154	0.1054	2.462e-07	-5.161	0.905015	RP11-424D14.1	187427	intergenic	0.128	6	9	0
1	6	rs2420551	rs6674177	A	G	69334834	0.1083	2.409e-07	5.165	0.916361	RP11-424D14.1	186747	intergenic	2.551	6	9	0
1	6	rs2420551	rs150821249	A	G	69335912	0.1064	1.963e-07	-5.203	0.915627	RP11-424D14.1	185669	intergenic	9.631	7	9	0
1	6	rs2420551	rs28450101	T	C	69336098	0.1074	3.689e-07	5.084	0.905699	RP11-424D14.1	185483	intergenic	1.576	6	9	0
1	6	rs2420551	rs28759443	T	C	69336277	0.1064	1.658e-07	5.234	0.915627	RP11-424D14.1	185304	intergenic	0.052	6	9	0
1	6	rs2420551	rs201068429	C	A	69336861	0.1064	NA	NA	0.915627	RP11-424D14.1	184720	intergenic	0.9	6	9	0
1	6	rs2420551	rs13376205	T	C	69337156	0.07753	6.074e-05	-4.01	0.662649	RP11-424D14.1	184425	intergenic	2.945	6	9	0
1	6	rs2420551	rs72680459	A	G	69337596	0.1083	3.176e-07	5.113	0.895941	RP11-424D14.1	183985	intergenic	1.36	6	9	0
1	6	rs2420551	rs13374447	T	C	69338706	0.1064	2.824e-07	5.135	0.915627	RP11-424D14.1	182875	intergenic	1.747	7	9	0
1	6	rs2420551	rs55790538	A	C	69339818	0.1074	3.96e-07	5.071	0.927139	RP11-424D14.1	181763	intergenic	1.709	7	9	0
1	6	rs2420551	rs11588339	A	G	69340693	0.1074	4.107e-07	5.064	0.927139	RP11-424D14.1	180888	intergenic	2.282	7	9	0
1	6	rs2420551	rs55873617	T	C	69341380	0.1074	4.064e-07	5.066	0.927139	RP11-424D14.1	180201	intergenic	1.666	7	9	0
1	6	rs2420551	rs55950045	T	C	69341421	0.1064	3.776e-07	5.08	0.916525	RP11-424D14.1	180160	intergenic	0.769	7	9	0
1	6	rs2420551	rs56066545	A	T	69341591	0.1044	NA	NA	0.895453	RP11-424D14.1	179990	intergenic	2.409	7	9	0
1	6	rs2420551	rs10789275	A	C	69341592	0.1064	9.7e-07	-4.898	0.896195	RP11-424D14.1	179989	intergenic	1.17	7	9	0
1	6	rs2420551	rs147259794	T	C	69341634	0.1074	NA	NA	0.927139	RP11-424D14.1	179947	intergenic	0.9	6	15	0
1	6	rs2420551	rs111342054	G	T	69341714	0.1074	NA	NA	0.927139	RP11-424D14.1	179867	intergenic	2.003	7	15	0
1	6	rs2420551	rs576707628	A	G	69342035	0.1074	NA	NA	0.927139	RP11-424D14.1	179546	intergenic	0.485	NA	15	0
1	6	rs2420551	rs575162614	A	G	69342279	0.1074	NA	NA	0.927139	RP11-424D14.1	179302	intergenic	0.71	NA	15	0
1	6	rs2420551	rs150873690	C	T	69343084	0.1074	NA	NA	0.927139	RP11-424D14.1	178497	intergenic	3.009	6	15	0
1	6	rs2420551	rs189052754	T	G	69343679	0.07555	NA	NA	0.647981	RP11-424D14.1	177902	intergenic	0.757	7	15	0
1	6	rs2420551	rs202181252	T	G	69343690	0.07455	NA	NA	0.638733	RP11-424D14.1	177891	intergenic	1.044	7	15	0
1	6	rs2420551	rs201429269	G	T	69344308	0.1521	NA	NA	0.606158	RP11-424D14.1	177273	intergenic	4.913	6	15	0
1	6	rs2420551	rs547251514	G	T	69344429	0.1074	NA	NA	0.927139	RP11-424D14.1	177152	intergenic	4.732	NA	15	0
1	6	rs2420551	rs368120584	G	A	69344640	0.1044	NA	NA	0.875236	RP11-424D14.1	176941	intergenic	3.752	7	15	0
1	6	rs2420551	rs369323688	C	G	69345312	0.1052	NA	NA	0.892474	RP11-424D14.1	176269	intergenic	0.668	NA	15	0
1	6	rs2420551	rs555275437	A	G	69345313	0.1034	NA	NA	0.884994	RP11-424D14.1	176268	intergenic	2.995	NA	15	0
1	6	rs2420551	rs377682615	C	T	69345832	0.1074	NA	NA	0.927139	RP11-424D14.1	175749	intergenic	0.568	7	15	0
1	6	rs2420551	rs560185552	G	C	69346061	0.1074	NA	NA	0.927139	RP11-424D14.1	175520	intergenic	0.631	NA	15	0
1	6	rs2420551	rs115367869	G	T	69346457	0.1074	NA	NA	0.927139	RP11-424D14.1	175124	intergenic	1.405	7	9	0
1	6	rs2420551	rs76609612	G	C	69346685	0.1064	NA	NA	0.89509	RP11-424D14.1	174896	intergenic	0.424	7	9	0
1	6	rs2420551	rs11802709	G	A	69346713	0.1064	NA	NA	0.89509	RP11-424D14.1	174868	intergenic	1.053	7	9	0
1	6	rs2420551	rs11801221	G	T	69346723	0.1064	NA	NA	0.89509	RP11-424D14.1	174858	intergenic	1.267	7	9	0
1	6	rs2420551	rs541600070	A	G	69346752	0.1064	NA	NA	0.915627	RP11-424D14.1	174829	intergenic	1.152	NA	9	0
1	6	rs2420551	rs574540746	A	G	69346776	0.1074	NA	NA	0.905699	RP11-424D14.1	174805	intergenic	0.515	NA	9	0
1	6	rs2420551	rs545811614	G	A	69346806	0.1074	NA	NA	0.905699	RP11-424D14.1	174775	intergenic	0.821	NA	7	0
1	6	rs2420551	rs375948504	G	C	69346831	0.1064	NA	NA	0.915627	RP11-424D14.1	174750	intergenic	0.637	6	7	0
1	6	rs2420551	rs370590483	A	C	69346851	0.1054	NA	NA	0.905015	RP11-424D14.1	174730	intergenic	3.611	7	7	0
1	6	rs2420551	rs151188803	T	C	69347126	0.1064	NA	NA	0.916525	RP11-424D14.1	174455	intergenic	4.958	5	1	0
1	6	rs2420551	rs111882121	C	T	69347234	0.1074	NA	NA	0.927139	RP11-424D14.1	174347	intergenic	0.553	5	1	0
1	6	rs2420551	rs150365963	G	A	69347260	0.1074	NA	NA	0.927139	RP11-424D14.1	174321	intergenic	1.614	5	1	0
1	6	rs2420551	rs11581649	A	C	69347290	0.1074	NA	NA	0.927139	RP11-424D14.1	174291	intergenic	1.675	5	1	0
1	6	rs2420551	rs11209362	A	C	69347850	0.1083	5.443e-07	-5.01	0.917364	RP11-424D14.1	173731	intergenic	1.134	7	1	0
1	6	rs2420551	rs11576549	T	G	69348545	0.1074	4.885e-07	-5.031	0.927139	RP11-424D14.1	173036	intergenic	3.986	7	1	0
1	6	rs2420551	rs55815583	T	C	69348956	0.1074	4.407e-07	5.05	0.927139	RP11-424D14.1	172625	intergenic	11.9	7	1	0
1	6	rs2420551	rs72680464	A	G	69350330	0.1093	9.208e-07	-4.908	0.907751	RP11-424D14.1	171251	intergenic	2.558	7	9	0
1	6	rs2420551	rs72680465	A	C	69350425	0.1083	7.86e-07	4.939	0.917364	RP11-424D14.1	171156	intergenic	3.183	7	9	0
1	6	rs2420551	rs72680466	A	C	69350576	0.1083	9.312e-07	-4.906	0.917364	RP11-424D14.1	171005	intergenic	1.894	7	9	0
1	6	rs2420551	rs72680467	A	G	69350993	0.1083	8.08e-07	-4.933	0.917364	RP11-424D14.1	170588	intergenic	2.269	6	9	0
1	6	rs2420551	rs4326670	T	C	69351205	0.1083	9.581e-07	-4.9	0.917364	RP11-424D14.1	170376	intergenic	1.811	NA	9	0
1	6	rs2420551	rs57003411	C	G	69351540	0.1083	8.108e-07	4.933	0.917364	RP11-424D14.1	170041	intergenic	0.499	7	9	0
1	6	rs2420551	rs61649525	T	C	69351782	0.1083	8.264e-07	4.929	0.917364	RP11-424D14.1	169799	intergenic	0.903	6	9	0
1	6	rs2420551	rs4344368	T	C	69352300	0.1064	5.436e-07	-5.01	0.916525	RP11-424D14.1	169281	intergenic	16.84	NA	9	0
1	6	rs2420551	rs72680472	C	G	69352545	0.1083	8.106e-07	4.933	0.917364	RP11-424D14.1	169036	intergenic	0.385	7	9	0
1	6	rs2420551	rs9436854	T	C	69354053	0.1083	6.534e-07	-4.975	0.917364	RP11-424D14.1	167528	intergenic	5.749	6	9	0
1	6	rs2420551	rs9436855	T	C	69354204	0.1083	7.149e-07	-4.957	0.917364	RP11-424D14.1	167377	intergenic	3.189	7	9	0
1	6	rs2420551	rs9436417	T	C	69354742	0.1083	5.716e-07	-5.001	0.917364	RP11-424D14.1	166839	intergenic	4.361	6	7	0
1	6	rs2420551	rs28599531	T	C	69355011	0.1083	7.172e-07	-4.957	0.917364	RP11-424D14.1	166570	intergenic	14.86	6	7	0
1	6	rs2420551	rs72680475	A	G	69355291	0.1083	7.242e-07	4.955	0.917364	RP11-424D14.1	166290	intergenic	5.16	2b	7	0
1	6	rs2420551	rs58102432	T	C	69355305	0.1083	7.561e-07	4.946	0.917364	RP11-424D14.1	166276	intergenic	2.091	4	7	0
1	6	rs2420551	rs6588341	A	G	69356272	0.1093	6.732e-07	-4.969	0.928027	RP11-424D14.1	165309	intergenic	4.499	5	9	0
1	6	rs2420551	rs11801354	T	C	69357436	0.1083	6.956e-07	-4.963	0.917364	RP11-424D14.1	164145	intergenic	0.678	7	5	0
1	6	rs2420551	rs11801756	T	C	69358156	0.1083	6.361e-07	-4.98	0.917364	RP11-424D14.1	163425	intergenic	0.299	7	7	0
1	6	rs2420551	rs11803723	A	T	69359009	0.1083	6.584e-07	-4.973	0.917364	RP11-424D14.1	162572	intergenic	2.386	7	9	0
1	6	rs2420551	rs60344420	A	T	69359401	0.1083	6.45e-07	4.977	0.917364	RP11-424D14.1	162180	intergenic	10.95	6	14	0
1	6	rs2420551	rs7415447	A	G	69359499	0.1083	NA	NA	0.917364	RP11-424D14.1	162082	intergenic	3.48	7	14	0
1	6	rs2420551	rs147399966	C	A	69359690	0.1074	NA	NA	0.927139	RP11-424D14.1	161891	intergenic	0.03	6	14	0
1	6	rs2420551	rs10889791	T	C	69359943	0.1093	1.558e-06	-4.804	0.928027	RP11-424D14.1	161638	intergenic	3.637	7	14	0
1	6	rs2420551	rs115874825	T	C	69360472	0.1074	3.889e-07	-5.074	0.906753	RP11-424D14.1	161109	intergenic	1.176	7	15	0
1	6	rs2420551	rs75630536	A	T	69360987	0.1083	4.049e-07	5.067	0.917364	RP11-424D14.1	160594	intergenic	3.05	7	15	0
1	6	rs2420551	rs145319697	A	G	69361185	0.1093	NA	NA	0.907751	RP11-424D14.1	160396	intergenic	0.8	6	15	0
1	6	rs2420551	rs143372870	A	G	69361377	0.1074	3.763e-07	5.081	0.906753	RP11-424D14.1	160204	intergenic	0.411	7	15	0
1	6	rs2420551	rs145755345	A	G	69361508	0.1064	3.813e-07	5.078	0.916525	RP11-424D14.1	160073	intergenic	0.808	7	15	0
1	6	rs2420551	rs58913091	A	G	69361670	0.1074	NA	NA	0.927139	RP11-424D14.1	159911	intergenic	1.944	6	15	0
1	6	rs2420551	rs72680478	A	T	69362524	0.1064	3.488e-07	5.095	0.916525	RP11-424D14.1	159057	intergenic	4.298	6	15	0
1	6	rs2420551	rs4617455	A	G	69363282	0.1083	5.074e-07	5.023	0.917364	RP11-424D14.1	158299	intergenic	1.945	NA	9	0
1	6	rs2420551	rs11802913	A	G	69364823	0.1083	5.815e-07	4.997	0.917364	RP11-424D14.1	156758	intergenic	0.443	6	9	0
1	6	rs2420551	rs9436418	T	C	69364885	0.1093	6.955e-07	4.963	0.928027	RP11-424D14.1	156696	intergenic	1.803	7	9	0
1	6	rs2420551	rs11806894	A	T	69366071	0.1083	5.196e-07	-5.019	0.917364	RP11-424D14.1	155510	intergenic	0.429	6	7	0
1	6	rs2420551	rs72680481	A	G	69366902	0.1064	3.219e-07	5.11	0.916525	RP11-424D14.1	154679	intergenic	8.838	7	5	0
1	6	rs2420551	rs11582908	A	G	69367409	0.1083	5.189e-07	-5.019	0.917364	RP11-424D14.1	154172	intergenic	1.77	6	5	0
1	6	rs2420551	rs72680485	T	G	69369267	0.1064	3.121e-07	5.116	0.916525	RP11-424D14.1	152314	intergenic	0.305	6	7	0
1	6	rs2420551	rs11809118	T	C	69369473	0.1083	5.785e-07	4.998	0.917364	RP11-424D14.1	152108	intergenic	0.988	7	7	0
1	6	rs2420551	rs7551318	T	G	69369837	0.1093	8.559e-07	-4.922	0.928027	RP11-424D14.1	151744	intergenic	0.488	7	7	0
1	6	rs2420551	rs72680486	A	G	69371516	0.1074	3.689e-07	-5.084	0.927139	RP11-424D14.1	150065	intergenic	1.211	6	9	0
1	6	rs2420551	rs72680487	A	T	69371555	0.1064	3.297e-07	-5.106	0.916525	RP11-424D14.1	150026	intergenic	0.743	7	9	0
1	6	rs2420551	rs6658623	T	C	69377135	0.1064	5.798e-08	5.425	0.957868	RP11-424D14.1	144446	intergenic	0.191	5	5	0
1	6	rs2420551	rs58815715	A	G	69378002	0.1054	1.087e-07	5.311	0.947197	RP11-424D14.1	143579	intergenic	1.773	7	5	0
1	6	rs2420551	rs72680492	C	G	69378459	0.1044	8.683e-08	-5.352	0.936579	RP11-424D14.1	143122	intergenic	2.563	6	5	0
1	6	rs2420551	rs6662460	A	C	69378487	0.1044	1.023e-07	5.323	0.936579	RP11-424D14.1	143094	intergenic	6.618	7	5	0
1	6	rs2420551	rs6662550	T	C	69378554	0.1054	1.06e-07	5.316	0.947197	RP11-424D14.1	143027	intergenic	2.167	7	5	0
1	6	rs2420551	rs72680493	C	G	69379658	0.1044	1.047e-07	5.318	0.936579	RP11-424D14.1	141923	intergenic	0.982	6	5	0
1	6	rs2420551	rs9804111	A	G	69379892	0.1044	7.266e-08	5.384	0.936579	RP11-424D14.1	141689	intergenic	2.555	7	5	0
1	6	rs2420551	rs4328112	A	G	69380983	0.1044	7.902e-08	-5.369	0.936579	RP11-424D14.1	140598	intergenic	6.137	NA	5	0
1	6	rs2420551	rs4539178	C	G	69381135	0.1054	1.021e-07	5.323	0.947197	RP11-424D14.1	140446	intergenic	0.682	5	5	0
1	6	rs2420551	rs56026859	A	G	69382976	0.1054	9.062e-08	5.345	0.947197	RP11-424D14.1	138605	intergenic	4.209	7	5	0
1	6	rs2420551	rs72680496	T	C	69383918	0.1054	1.032e-07	-5.321	0.947197	RP11-424D14.1	137663	intergenic	1.763	7	5	0
1	6	rs2420551	rs4420133	C	G	69384518	0.1054	1.188e-07	5.295	0.947197	RP11-424D14.1	137063	intergenic	0.428	5	5	0
1	6	rs2420551	rs10127680	T	C	69386730	0.1044	8.383e-08	5.359	0.957489	RP11-424D14.1	134851	intergenic	1.413	6	9	0
1	6	rs2420551	rs9629020	A	T	69387823	0.1044	7.403e-08	-5.381	0.957489	RP11-424D14.1	133758	intergenic	3.248	6	9	0
1	6	rs2420551	rs9629013	A	G	69388905	0.1044	9.601e-08	-5.334	0.957489	RP11-424D14.1	132676	intergenic	2.042	6	9	0
1	6	rs2420551	rs6682095	C	G	69389242	0.1034	6.179e-08	5.414	0.946871	RP11-424D14.1	132339	intergenic	0.874	7	1	0
1	6	rs2420551	rs6682255	C	G	69389574	0.1044	1.217e-07	-5.291	0.957489	RP11-424D14.1	132007	intergenic	2.274	5	1	0
1	6	rs2420551	rs561165501	C	G	69391778	0.1173	NA	NA	0.838583	RP11-424D14.1	129803	intergenic	0.565	NA	15	0
1	6	rs2420551	rs74883477	G	C	69392237	0.1054	NA	NA	0.947197	RP11-424D14.1	129344	intergenic	2.982	6	15	0
1	6	rs2420551	rs138359697	T	A	69392476	0.1044	NA	NA	0.957489	RP11-424D14.1	129105	intergenic	1.786	7	15	0
1	6	rs2420551	rs200715280	C	T	69392898	0.1034	NA	NA	0.946871	RP11-424D14.1	128683	intergenic	2.776	7	15	0
1	6	rs2420551	rs572166228	C	A	69394642	0.1034	NA	NA	0.946871	RP11-424D14.1	126939	intergenic	1.114	NA	14	0
1	6	rs2420551	rs72680499	T	C	69395485	0.1044	9.823e-08	-5.33	0.957489	RP11-424D14.1	126096	intergenic	2.42	6	7	0
1	6	rs2420551	rs6662842	T	G	69399775	0.1024	9.255e-08	-5.341	0.978618	RP11-424D14.1	121806	intergenic	9.995	7	7	0
1	6	rs2420551	rs9803974	T	G	69400432	0.1014	8.661e-08	5.353	0.968006	RP11-424D14.1	121149	intergenic	1.109	5	5	0
1	6	rs2420551	rs72682206	A	C	69400780	0.1014	6.243e-08	-5.412	0.968006	RP11-424D14.1	120801	intergenic	1.733	6	7	0
1	6	rs2420551	rs6690346	T	C	69402457	0.1024	1.054e-07	5.317	0.978618	RP11-424D14.1	119124	intergenic	0.437	7	9	0
1	6	rs2420551	rs11801267	A	G	69403245	0.1024	9.993e-08	-5.327	0.978618	RP11-424D14.1	118336	intergenic	0.734	7	7	0
1	6	rs2420551	rs72682209	A	G	69403582	0.1014	6.196e-08	-5.413	0.968006	RP11-424D14.1	117999	intergenic	0.018	5	7	0
1	6	rs2420551	rs72682210	A	T	69403584	0.1014	5.722e-08	-5.427	0.968006	RP11-424D14.1	117997	intergenic	0.04	5	7	0
1	6	rs2420551	rs11578193	T	G	69406043	0.1024	1.034e-07	-5.321	0.978618	RP11-424D14.1	115538	intergenic	1.974	6	9	0
1	6	rs2420551	rs72682214	T	C	69406872	0.1024	1.012e-07	-5.325	0.978618	RP11-424D14.1	114709	intergenic	2.573	5	9	0
1	6	rs2420551	rs4317857	T	C	69408578	0.1014	6.376e-08	5.408	0.968006	RP11-424D14.1	113003	intergenic	0.585	NA	9	0
1	6	rs2420551	rs72682215	T	C	69409730	0.1024	8.737e-08	-5.351	0.978618	RP11-424D14.1	111851	intergenic	0.033	6	9	0
1	6	rs2420551	rs10047248	T	G	69410530	0.1024	8.665e-08	5.353	0.978618	RP11-424D14.1	111051	intergenic	0.885	7	9	0
1	6	rs2420551	rs11209370	A	G	69411095	0.1024	9.596e-08	5.334	0.978618	RP11-424D14.1	110486	intergenic	2.678	7	5	0
1	6	rs2420551	rs72682218	A	C	69411330	0.1014	6.863e-08	5.395	0.968006	RP11-424D14.1	110251	intergenic	4.879	7	5	0
1	6	rs2420551	rs4390220	A	C	69412517	0.1024	8.851e-08	5.349	0.978618	RP11-424D14.1	109064	intergenic	3.345	NA	5	0
1	6	rs2420551	rs6658033	T	C	69412689	0.1024	8.1e-08	5.365	0.978618	RP11-424D14.1	108892	intergenic	2.503	6	5	0
1	6	rs2420551	rs6658121	T	C	69412716	0.1024	8.854e-08	5.349	0.978618	RP11-424D14.1	108865	intergenic	3.983	7	5	0
1	6	rs2420551	rs10047054	T	C	69412732	0.1014	6.368e-08	5.408	0.968006	RP11-424D14.1	108849	intergenic	1.888	7	5	0
1	6	rs2420551	rs6673849	T	C	69413111	0.1024	8.712e-08	-5.352	0.978618	RP11-424D14.1	108470	intergenic	1.827	7	5	0
1	6	rs2420551	rs11804299	A	G	69415213	0.1024	9.613e-08	-5.334	0.978618	RP11-424D14.1	106368	intergenic	2.398	7	5	0
1	6	rs2420551	rs4484966	A	G	69415465	0.1024	8.088e-08	5.365	0.978618	RP11-424D14.1	106116	intergenic	1.699	NA	5	0
1	6	rs2420551	rs72682221	T	C	69415479	0.06859	0.0002522	-3.66	0.620092	RP11-424D14.1	106102	intergenic	2.105	7	5	0
1	6	rs2420551	rs9436863	A	C	69416180	0.1034	6.078e-08	-5.416	0.989283	RP11-424D14.1	105401	intergenic	4.537	7	5	0
1	6	rs2420551	rs11802814	A	G	69417310	0.1024	9.663e-08	-5.333	0.978618	RP11-424D14.1	104271	intergenic	0.634	6	5	0
1	6	rs2420551	rs72682222	A	G	69418123	0.1024	1.54e-07	-5.248	0.978618	RP11-424D14.1	103458	intergenic	2.367	7	5	0
1	6	rs2420551	rs13375505	T	C	69419136	0.1024	8.794e-08	5.35	0.978618	RP11-424D14.1	102445	intergenic	7.282	5	5	0
1	6	rs2420551	rs4301671	A	T	69420375	0.1034	1.249e-07	-5.286	0.989283	RP11-424D14.1	101206	intergenic	5.88	5	5	0
1	6	rs2420551	rs1396022	A	G	69421826	0.1034	1.173e-07	-5.298	0.989283	RP11-424D14.1	99755	intergenic	16.91	NA	5	0
1	6	rs2420551	rs1507858	T	C	69422680	0.1034	1.818e-07	5.217	0.989283	RP11-424D14.1	98901	intergenic	3.311	NA	5	0
1	6	rs2420551	rs12087596	T	C	69423415	0.1034	9.306e-08	-5.34	0.989283	RP11-424D14.1	98166	intergenic	7.28	7	5	0
1	6	rs2420551	rs4649904	A	G	69423725	0.1034	9.589e-08	-5.334	0.989283	RP11-424D14.1	97856	intergenic	0.894	NA	5	0
1	6	rs2420551	rs1507855	A	G	69424337	0.1034	8.439e-08	-5.357	0.989283	RP11-424D14.1	97244	intergenic	0.547	NA	5	0
1	6	rs2420551	rs72682227	C	G	69424711	0.1024	4.323e-08	5.477	0.978618	RP11-424D14.1	96870	intergenic	0.932	7	2	0
1	6	rs2420551	rs72682228	T	G	69424724	0.1024	5.163e-08	5.446	0.978618	RP11-424D14.1	96857	intergenic	0.199	7	2	0
1	6	rs2420551	rs9436866	A	C	69427576	0.1014	3.144e-08	-5.533	0.968006	RP11-424D14.1	94005	intergenic	2.318	7	5	0
1	6	rs2420551	rs7547769	A	G	69428547	0.1024	2.965e-08	5.544	0.978618	RP11-424D14.1	93034	intergenic	3.869	6	5	0
1	6	rs2420551	rs9436422	T	C	69430200	0.08449	2.04e-06	4.749	0.772465	RP11-424D14.1	91381	intergenic	5.778	6	5	0
1	6	rs2420551	rs994176	T	C	69430915	0.0835	3.399e-06	-4.645	0.762654	RP11-424D14.1	90666	intergenic	12.17	NA	5	0
1	6	rs2420551	rs9436423	C	G	69431150	0.0835	3.613e-06	-4.633	0.762654	RP11-424D14.1	90431	intergenic	1.733	7	5	0
1	6	rs2420551	rs13375469	A	G	69431362	0.08449	3.743e-06	-4.625	0.772465	RP11-424D14.1	90219	intergenic	0.701	7	5	0
1	6	rs2420551	rs1022013	A	G	69432044	0.1034	5.709e-08	-5.428	0.989283	RP11-424D14.1	89537	intergenic	1.014	NA	5	0
1	6	rs2420551	rs116109100	A	G	69432704	0.08449	3.337e-06	4.649	0.772465	RP11-424D14.1	88877	intergenic	6.536	5	5	0
1	6	rs2420551	rs193089622	T	C	69432745	0.08449	NA	NA	0.772465	RP11-424D14.1	88836	intergenic	2.12	5	5	0
1	6	rs2420551	rs184377319	C	A	69432747	0.08449	NA	NA	0.772465	RP11-424D14.1	88834	intergenic	1.26	5	5	0
1	6	rs2420551	rs114927020	A	G	69432836	0.08449	3.099e-06	4.664	0.772465	RP11-424D14.1	88745	intergenic	0.298	5	5	0
1	6	rs2420551	rs6669357	A	G	69433435	0.1034	8.33e-08	5.36	0.989283	RP11-424D14.1	88146	intergenic	2.285	7	5	0
1	6	rs2420551	rs4484967	A	G	69437856	0.1034	2.754e-08	5.556	0.989283	RP11-424D14.1	83725	intergenic	3.319	NA	5	0
1	6	rs2420551	rs4313445	T	C	69438130	0.0835	4.475e-06	4.588	0.762654	RP11-424D14.1	83451	intergenic	5.467	NA	5	0
1	6	rs2420551	rs2420551	A	T	69438777	0.1044	2.151e-08	-5.599	1	RP11-424D14.1	82804	intergenic	4.865	7	5	0
1	7	rs67474621	rs11209896	A	G	72512988	0.4433	3.015e-08	5.541	0.684241	NEGR1	0	intronic	4.408	7	2	1
1	7	rs67474621	rs12564163	T	G	72513121	0.4433	2.71e-08	-5.559	0.684241	NEGR1	0	intronic	4.248	6	7	1
1	7	rs34305371	rs6699175	T	C	72514896	0.0994	6.695e-07	4.97	0.726125	NEGR1	0	intronic	6.172	7	5	1
1	7	rs34305371	rs4348675	T	C	72515717	0.1233	4.319e-08	-5.477	0.604649	NEGR1	0	intronic	0.828	6	5	1
1	7	rs67474621	rs975480	A	G	72517928	0.4433	2.816e-08	5.552	0.684241	NEGR1	0	intronic	10.43	NA	5	1
1	7	rs67474621	rs1486084	T	C	72520941	0.4433	2.947e-08	-5.545	0.684241	NEGR1	0	intronic	5.941	NA	15	1
1	7	rs67474621	rs11209899	A	G	72522971	0.4433	2.999e-08	5.541	0.684241	NEGR1	0	intronic	1.802	7	15	1
1	7	rs67474621	rs12036443	T	G	72524862	0.4433	3.361e-08	-5.521	0.684241	NEGR1	0	intronic	2.234	5	7	1
1	7	rs67474621	rs2821272	T	C	72525098	0.4433	3.35e-08	-5.522	0.684241	NEGR1	0	intronic	3.803	NA	5	1
1	7	rs67474621	rs11209900	T	C	72529337	0.4433	3.305e-08	5.524	0.684241	NEGR1	0	intronic	4.65	4	1	1
1	7	rs67474621	rs12131816	T	C	72529866	0.4433	3.292e-08	-5.525	0.684241	NEGR1	0	intronic	17.8	7	1	1
1	7	rs67474621	rs12408173	A	G	72531083	0.4443	3.182e-08	-5.531	0.680234	NEGR1	0	intronic	3.514	7	5	1
1	7	rs67474621	rs12132044	A	G	72533676	0.4423	2.641e-08	5.564	0.687283	NEGR1	0	intronic	2.313	7	5	1
1	7	rs67474621	rs2630381	T	C	72533775	0.4433	3.51e-08	-5.514	0.684241	NEGR1	0	intronic	2.16	NA	5	1
1	7	rs67474621	rs2220252	A	G	72534543	0.4433	3.301e-08	5.525	0.684241	NEGR1	0	intronic	0.236	NA	5	1
1	7	rs67474621	rs2821266	T	C	72535285	0.4433	3.58e-08	5.51	0.684241	NEGR1	0	intronic	0.998	NA	14	1
1	7	rs67474621	rs2200484	A	T	72536341	0.4433	3.263e-08	5.527	0.684241	NEGR1	0	intronic	2.763	7	9	1
1	7	rs67474621	rs12409966	T	C	72539545	0.4433	3.618e-08	5.509	0.684241	NEGR1	0	intronic	2.512	7	14	1
1	7	rs67474621	rs2422135	T	C	72540398	0.4433	3.624e-08	-5.508	0.684241	NEGR1	0	intronic	1.781	7	15	1
1	7	rs67474621	rs11209905	T	C	72540875	0.4433	2.063e-08	-5.607	0.684241	NEGR1	0	intronic	10.9	6	15	1
1	7	rs67474621	rs12049085	T	C	72542738	0.4433	3.635e-08	5.508	0.684241	NEGR1	0	intronic	0.27	7	9	1
1	7	rs1620977	rs7542974	A	G	72544704	0.2644	3.206e-09	5.921	0.632498	NEGR1	0	intronic	2.286	7	15	1
1	7	rs67474621	rs11209906	T	C	72545694	0.4433	2.071e-08	5.606	0.684241	NEGR1	0	intronic	3.562	6	15	1
1	7	rs67474621	rs12130387	C	G	72547396	0.4433	1.708e-08	5.639	0.684241	NEGR1	0	intronic	0.503	6	15	1
1	7	rs67474621	rs2821260	T	C	72554093	0.4433	1.644e-08	-5.646	0.684241	NEGR1	0	intronic	0.711	NA	15	1
1	7	rs67474621	rs973526	T	C	72556393	0.497	2.093e-09	-5.99	0.758836	NEGR1	0	intronic	2.224	6	15	1
1	7	rs67474621	rs12140090	T	C	72558138	0.4722	1.139e-10	-6.447	0.934537	NEGR1	0	intronic	6.123	6	15	1
1	7	rs67474621	rs727726	T	C	72559740	0.494	4.881e-11	-6.575	0.848177	NEGR1	0	intronic	4.63	6	15	1
1	7	rs77944304	rs77801296	T	C	72562125	0.2724	5.078e-10	6.217	0.811682	NEGR1	0	intronic	3.623	6	15	0
1	7	rs77944304	rs2016698	A	G	72562478	0.2734	1.386e-09	-6.057	0.807395	NEGR1	0	intronic	5.487	6	15	0
1	7	rs77944304	rs1817624	T	G	72562479	0.2724	1.059e-09	-6.1	0.811682	NEGR1	0	intronic	2.552	6	15	0
1	7	rs67474621	rs2220253	T	C	72565460	0.4911	5.906e-11	-6.546	0.858505	NEGR1	0	intronic	1.641	6	5	1
1	7	rs77944304	rs17588282	A	G	72567065	0.2724	4.941e-10	-6.221	0.811682	NEGR1	0	intronic	3.779	6	7	0
1	7	rs77944304	rs10493493	T	G	72569309	0.2724	5.103e-10	-6.216	0.811682	NEGR1	0	intronic	0.102	7	15	0
1	7	rs67474621	rs2630392	A	T	72569613	0.4911	6.574e-11	-6.53	0.858505	NEGR1	0	intronic	1.777	7	15	1
1	7	rs77944304	rs11589787	A	G	72570425	0.2734	3.738e-10	-6.265	0.81858	NEGR1	0	intronic	0.036	7	15	0
1	7	rs67474621	rs1486091	T	C	72571364	0.4911	5.735e-11	-6.55	0.858505	NEGR1	0	intronic	4.311	6	7	1
1	7	rs67474621	rs1352082	A	C	72571656	0.4722	1.164e-10	6.444	0.934537	NEGR1	0	intronic	16.93	7	5	1
1	7	rs77944304	rs78851102	A	C	72572054	0.2386	4.82e-10	-6.225	0.99432	NEGR1	0	intronic	7.171	5	5	0
1	7	rs67474621	rs1486093	T	C	72573363	0.4722	1.199e-10	-6.439	0.934537	NEGR1	0	intronic	10.14	6	5	1
1	7	rs67474621	rs1486094	A	T	72573432	0.4911	1.022e-10	-6.464	0.858505	NEGR1	0	intronic	3.349	6	5	1
1	7	rs67474621	rs1564970	T	C	72573798	0.4722	1.25e-10	-6.433	0.934537	NEGR1	0	intronic	2.323	6	5	1
1	7	rs77944304	rs56062633	T	C	72574617	0.2734	3.876e-10	-6.259	0.81858	NEGR1	0	intronic	1.796	7	5	0
1	7	rs77944304	rs56248439	T	C	72574649	0.2386	3.871e-10	-6.259	0.99432	NEGR1	0	intronic	10.82	7	5	0
1	7	rs67474621	rs28485041	C	T	72576770	0.4404	NA	NA	0.719596	NEGR1	0	intronic	0.443	6	5	0
1	7	rs67474621	rs2630395	A	G	72577177	0.4911	1.17e-10	-6.443	0.858505	NEGR1	0	intronic	2.206	6	5	1
1	7	rs67474621	rs2821246	A	T	72577179	0.4901	9.603e-11	-6.473	0.855103	NEGR1	0	intronic	5.745	6	5	1
1	7	rs67474621	rs67474621	A	T	72577950	0.4841	6.371e-13	-7.192	1	NEGR1	0	intronic	1.2	6	5	0
1	7	rs67474621	rs12402629	T	C	72578709	0.4742	1.291e-10	-6.428	0.93437	NEGR1	0	intronic	1.398	7	5	1
1	7	rs77944304	rs12124902	A	G	72579373	0.2724	4.054e-10	6.252	0.822873	NEGR1	0	intronic	5.751	5	5	0
1	7	rs77944304	rs77944304	T	C	72582779	0.2376	2.988e-10	-6.299	1	NEGR1	0	intronic	5.043	7	5	0
1	7	rs67474621	rs1385912	A	T	72583375	0.495	1.248e-09	-6.074	0.852444	NEGR1	0	intronic	8.167	5	5	1
1	7	rs67474621	rs2630400	A	G	72583763	0.496	5.88e-11	-6.547	0.862892	NEGR1	0	intronic	4.983	7	5	1
1	7	rs67474621	rs1486096	A	G	72584184	0.4761	1.99e-10	6.362	0.941402	NEGR1	0	intronic	4.295	5	5	1
1	7	rs77944304	rs1486097	A	G	72584796	0.2724	4.342e-10	-6.241	0.822873	NEGR1	0	intronic	0.728	7	5	0
1	7	rs77944304	rs7549778	C	G	72585353	0.2734	4.363e-10	-6.24	0.81994	NEGR1	0	intronic	0.148	5	5	0
1	7	rs67474621	rs11209915	T	C	72586208	0.4761	1.455e-10	6.41	0.941402	NEGR1	0	intronic	6.548	6	5	1
1	7	rs67474621	rs11209916	A	G	72586209	0.4761	1.082e-10	-6.455	0.941402	NEGR1	0	intronic	5.45	6	5	1
1	7	rs67474621	rs7556006	C	G	72587186	0.4761	1.282e-10	6.429	0.941402	NEGR1	0	intronic	0.483	7	5	1
1	7	rs1620977	rs12128707	A	G	72588119	0.2853	1.557e-10	-6.4	0.773631	NEGR1	0	intronic	7.743	5	1	1
1	7	rs114030538	rs114030538	T	C	72588658	0.05169	1.298e-08	5.686	1	NEGR1	0	intronic	0.834	6	2	0
1	7	rs77944304	rs7517387	T	G	72589319	0.2724	3.947e-10	-6.256	0.822873	NEGR1	0	intronic	1.012	7	5	0
1	7	rs67474621	rs2821239	A	G	72590193	0.496	4.854e-11	-6.575	0.862892	NEGR1	0	intronic	1.58	NA	5	1
1	7	rs67474621	rs2630406	A	G	72590865	0.496	5.564e-11	-6.555	0.862892	NEGR1	0	intronic	1.632	6	5	1
1	7	rs67474621	rs1385914	G	A	72591774	0.4761	NA	NA	0.941402	NEGR1	0	intronic	0.539	4	7	0
1	7	rs67474621	rs4649954	T	G	72593174	0.4533	3.238e-11	6.635	0.869862	NEGR1	0	intronic	1.305	6	5	1
1	7	rs67474621	rs12141628	T	C	72593767	0.4761	1.215e-10	6.437	0.941402	NEGR1	0	intronic	8.847	6	5	1
1	7	rs67474621	rs12132602	A	G	72597051	0.4761	1.925e-10	-6.367	0.941402	NEGR1	0	intronic	1.346	5	15	1
1	7	rs67474621	rs12750634	A	T	72597654	0.4761	2.428e-10	6.331	0.941402	NEGR1	0	intronic	2.584	7	9	1
1	7	rs77944304	rs7413319	A	T	72599191	0.2714	6.054e-10	-6.189	0.827192	NEGR1	0	intronic	3.103	7	9	0
1	7	rs77944304	rs4650129	A	G	72600038	0.2724	7.146e-10	-6.163	0.822873	NEGR1	0	intronic	2.099	7	9	0
1	7	rs77944304	rs11583451	A	G	72602756	0.2724	6.337e-10	-6.182	0.822873	NEGR1	0	intronic	0.225	6	8	0
1	7	rs77944304	rs112877838	A	C	72603378	0.2724	6.675e-10	-6.174	0.822873	NEGR1	0	intronic	5.507	7	8	0
1	7	rs67474621	rs2630390	C	G	72603400	0.496	1.026e-10	6.463	0.862892	NEGR1	0	intronic	2.697	5	8	1
1	7	rs77944304	rs1385921	T	C	72606298	0.2734	6.179e-10	6.186	0.81858	NEGR1	0	intronic	1.006	NA	5	0
1	7	rs77944304	rs1385920	A	T	72606383	0.2724	6.869e-10	-6.169	0.822873	NEGR1	0	intronic	6.302	5	5	0
1	7	rs77944304	rs12137663	A	G	72607638	0.2724	6e-10	6.19	0.822873	NEGR1	0	intronic	16.94	7	5	0
1	7	rs77944304	rs12139652	A	G	72609333	0.2724	5.958e-10	6.192	0.822873	NEGR1	0	intronic	3.242	6	5	0
1	7	rs77944304	rs76865614	A	G	72609647	0.2724	6.597e-10	-6.175	0.822873	NEGR1	0	intronic	3.39	7	5	0
1	7	rs67474621	rs57316908	C	G	72609955	0.4761	1.993e-10	6.362	0.941402	NEGR1	0	intronic	0.284	6	5	1
1	7	rs67474621	rs11209920	A	T	72610802	0.4761	1.573e-10	-6.398	0.941402	NEGR1	0	intronic	1.288	6	5	1
1	7	rs67474621	rs12133604	T	G	72610879	0.4761	2.332e-10	6.338	0.941402	NEGR1	0	intronic	3.253	6	5	1
1	7	rs77944304	rs74924535	A	G	72611772	0.2724	7.718e-10	-6.151	0.822873	NEGR1	0	intronic	0.925	7	5	0
1	7	rs77944304	rs75014666	A	G	72612001	0.2724	6.301e-10	-6.183	0.822873	NEGR1	0	intronic	2.507	7	5	0
1	7	rs77944304	rs11587829	T	C	72612227	0.2724	6.977e-10	6.167	0.822873	NEGR1	0	intronic	0.816	7	5	0
1	7	rs67474621	rs11209921	T	C	72612371	0.4761	1.685e-10	6.388	0.941402	NEGR1	0	intronic	2.685	6	5	1
1	7	rs77944304	rs11587895	T	C	72612615	0.2724	4.45e-10	6.237	0.822873	NEGR1	0	intronic	1.032	5	5	0
1	7	rs77944304	rs55777234	T	C	72613020	0.2724	6.703e-10	6.173	0.822873	NEGR1	0	intronic	3.047	7	5	0
1	7	rs67474621	rs7515320	T	G	72613608	0.4761	1.559e-10	6.4	0.941402	NEGR1	0	intronic	0.162	6	4	1
1	7	rs77944304	rs12136617	C	G	72613706	0.2724	7.139e-10	-6.163	0.822873	NEGR1	0	intronic	0.218	7	4	0
1	7	rs67474621	rs7541218	T	C	72613917	0.4761	1.354e-10	6.421	0.941402	NEGR1	0	intronic	3.016	7	4	1
1	7	rs67474621	rs7517923	T	G	72614077	0.4712	1.206e-10	6.439	0.923583	NEGR1	0	intronic	0.434	7	4	1
1	7	rs1620977	rs11587434	A	G	72615118	0.2833	1.56e-10	6.399	0.772002	NEGR1	0	intronic	0.394	7	5	1
1	7	rs77944304	rs11209923	A	G	72615198	0.2624	6.458e-09	5.804	0.847185	NEGR1	0	intronic	1.61	6	5	1
1	7	rs17589603	rs79103491	C	G	72615624	0.09443	8.419e-11	-6.493	0.976487	NEGR1	0	intronic	0.298	6	5	1
1	7	rs67474621	rs2422136	A	C	72618544	0.4742	5.581e-10	6.202	0.77702	NEGR1	0	intronic	2.143	6	5	1
1	7	rs77944304	rs17589316	T	C	72619339	0.2624	6.998e-09	5.791	0.847185	NEGR1	0	intronic	0.921	7	5	1
1	7	rs67474621	rs2422137	A	C	72619961	0.4712	6.035e-11	6.543	0.902032	NEGR1	0	intronic	2.846	7	5	1
1	7	rs34305371	rs12124523	T	C	72621463	0.09543	7.367e-08	5.382	0.805693	NEGR1	0	intronic	3.223	6	5	1
1	7	rs67474621	rs12568918	T	C	72622654	0.4573	NA	NA	0.734534	NEGR1	0	intronic	1.172	6	5	0
1	7	rs67474621	rs11209928	A	G	72627031	0.4742	4.898e-10	6.222	0.771012	NEGR1	0	intronic	6.452	5	5	1
1	7	rs67474621	rs2821296	T	C	72629795	0.4751	6.675e-10	-6.174	0.774169	NEGR1	0	intronic	0.928	NA	7	1
1	7	rs17589603	rs17589603	A	G	72632885	0.09443	4.498e-11	6.587	1	NEGR1	0	intronic	1.878	7	7	1
1	7	rs67474621	rs2630431	T	C	72634986	0.4751	9.672e-10	-6.115	0.774169	NEGR1	0	intronic	2.942	7	5	1
1	7	rs34305371	rs12134600	A	C	72635996	0.1223	4.92e-08	5.454	0.628723	NEGR1	0	intronic	6.065	5	5	1
1	7	rs77944304	rs1486111	A	T	72637468	0.2614	5.157e-09	-5.842	0.841741	NEGR1	0	intronic	3.274	6	7	1
1	7	rs77944304	rs12126162	A	C	72638618	0.2614	7.388e-09	-5.782	0.841741	NEGR1	0	intronic	5.699	7	9	1
1	7	rs67474621	rs2821295	A	G	72639856	0.4751	8.265e-10	6.14	0.774169	NEGR1	0	intronic	0.737	NA	15	1
1	7	rs77944304	rs12117225	T	C	72640353	0.2614	3.967e-09	5.886	0.841741	NEGR1	0	intronic	12.95	6	15	1
1	7	rs67474621	rs2821293	A	G	72642650	0.4751	8.762e-10	6.13	0.774169	NEGR1	0	intronic	1.415	NA	15	1
1	7	rs67474621	rs11209932	A	G	72642877	0.4751	1.205e-09	-6.08	0.774169	NEGR1	0	intronic	7.031	7	7	1
1	7	rs67474621	rs12036585	T	C	72644116	0.4761	1.008e-09	6.108	0.770701	NEGR1	0	intronic	7.639	5	2	1
1	7	rs67474621	rs6699731	A	G	72645734	0.4761	1.066e-09	6.099	0.770701	NEGR1	0	intronic	1.376	6	5	1
1	7	rs77944304	rs79164782	A	G	72645779	0.2614	5.557e-09	5.83	0.841741	NEGR1	0	intronic	0.525	6	5	1
1	7	rs67474621	rs6699841	G	A	72645850	0.4751	NA	NA	0.761668	NEGR1	0	intronic	13.69	7	5	1
1	7	rs67474621	rs11209933	A	G	72647443	0.4751	8.755e-10	-6.131	0.774169	NEGR1	0	intronic	1.62	7	5	1
1	7	rs77944304	rs112312657	T	C	72647974	0.2614	4.893e-09	-5.851	0.841741	NEGR1	0	intronic	2.363	6	5	1
1	7	rs77944304	rs11209935	A	G	72650254	0.2813	2.087e-08	-5.605	0.759003	NEGR1	0	intronic	1.458	5	1	0
1	7	rs77944304	rs74824226	T	C	72650546	0.2614	4.476e-09	-5.866	0.841741	NEGR1	0	intronic	2.944	6	2	1
1	7	rs67474621	rs6668604	T	G	72650925	0.4761	8.332e-10	6.138	0.770701	NEGR1	0	intronic	0.496	7	5	1
1	7	rs77944304	rs17524209	A	G	72653038	0.2614	4.502e-09	-5.865	0.841741	NEGR1	0	intronic	1.96	6	5	1
1	7	rs77944304	rs2298152	A	G	72654730	0.2614	4.062e-09	5.882	0.841741	NEGR1	0	intronic	7.342	NA	5	1
1	7	rs77944304	rs2298151	T	C	72655369	0.2614	4.125e-09	5.879	0.841741	NEGR1	0	intronic	0.989	NA	5	1
1	7	rs77944304	rs2153929	T	C	72658214	0.2624	3.932e-09	5.887	0.837222	NEGR1	0	intronic	13.59	6	5	1
1	7	rs67474621	rs2821288	T	C	72661104	0.4761	6.464e-10	-6.179	0.770701	NEGR1	0	intronic	0.877	NA	5	1
1	7	rs77944304	rs6656980	A	G	72661288	0.2614	3.769e-09	5.894	0.841741	NEGR1	0	intronic	0.855	6	5	1
1	7	rs67474621	rs61765618	T	A	72662344	0.4533	NA	NA	0.69154	NEGR1	0	intronic	0.489	7	5	1
1	7	rs67474621	rs61765619	T	A	72662345	0.4533	NA	NA	0.69154	NEGR1	0	intronic	0.392	7	5	0
1	7	rs67474621	rs61765620	G	T	72662347	0.4533	NA	NA	0.69154	NEGR1	0	intronic	3.241	7	5	0
1	7	rs77944304	rs7518919	A	G	72663249	0.2614	3.952e-09	5.886	0.841741	NEGR1	0	intronic	0.785	6	2	1
1	7	rs77944304	rs7529364	C	G	72663405	0.2435	5.646e-10	-6.2	0.913735	NEGR1	0	intronic	5.954	7	1	0
1	7	rs77944304	rs12141242	T	C	72663576	0.2614	3.887e-09	-5.889	0.841741	NEGR1	0	intronic	0.797	4	1	1
1	7	rs77944304	rs1342874	T	C	72664938	0.2614	3.621e-09	-5.901	0.841741	NEGR1	0	intronic	0.05	7	5	0
1	7	rs67474621	rs2821285	T	C	72667196	0.4761	6.004e-10	-6.19	0.776656	NEGR1	0	intronic	2.668	NA	5	1
1	7	rs77944304	rs1342863	A	C	72669563	0.2614	4.079e-09	-5.881	0.841741	NEGR1	0	intronic	1.503	7	5	1
1	7	rs77944304	rs7349073	T	C	72670841	0.2604	2.526e-09	-5.96	0.836333	NEGR1	0	intronic	3.934	7	5	1
1	7	rs77944304	rs10493494	C	G	72670904	0.2614	4.323e-09	5.871	0.841741	NEGR1	0	intronic	0.672	6	5	1
1	7	rs67474621	rs2797540	A	G	72673194	0.4771	5.593e-10	-6.201	0.785883	NEGR1	0	intronic	1.305	6	1	1
1	7	rs67474621	rs1858600	T	C	72674489	0.4761	4.79e-10	-6.226	0.776656	NEGR1	0	intronic	10.22	4	7	1
1	7	rs77944304	rs74653947	A	C	72676153	0.2614	3.469e-09	5.908	0.841741	NEGR1	0	intronic	1.071	6	15	1
1	7	rs67474621	rs1194259	A	G	72681358	0.4761	4.809e-10	6.225	0.776656	NEGR1	0	intronic	2.178	7	9	1
1	7	rs67474621	rs1675356	T	C	72683226	0.4771	4.971e-10	-6.22	0.785883	NEGR1	0	intronic	2.908	6	5	1
1	7	rs77944304	rs6698979	T	C	72683471	0.2614	4.368e-09	5.87	0.841741	NEGR1	0	intronic	0.606	6	5	1
1	7	rs77944304	rs6659016	C	G	72683616	0.2614	3.767e-09	-5.894	0.841741	NEGR1	0	intronic	0.236	6	5	1
1	7	rs67474621	rs1194286	A	G	72688503	0.4751	9.229e-10	-6.122	0.773488	NEGR1	0	intronic	3.381	NA	5	1
1	7	rs77944304	rs12125336	T	C	72692630	0.2604	3.2e-09	-5.921	0.835066	NEGR1	0	intronic	6.119	7	5	1
1	7	rs67474621	rs1205484	T	G	72695547	0.4751	7.719e-10	-6.151	0.773488	NEGR1	0	intronic	15.63	NA	5	1
1	7	rs77944304	rs78152876	A	G	72696649	0.2624	2.756e-09	5.946	0.828654	NEGR1	0	intronic	1.512	4	5	1
1	7	rs67474621	rs1194273	T	C	72696927	0.4761	7.356e-10	-6.158	0.782704	NEGR1	0	intronic	4.669	NA	5	1
1	7	rs77944304	rs11209938	T	C	72697178	0.2604	3.412e-09	5.91	0.835066	NEGR1	0	intronic	1.032	6	5	1
1	7	rs77944304	rs985227	T	G	72697459	0.2624	2.921e-09	5.936	0.828654	NEGR1	0	intronic	3.608	NA	5	1
1	7	rs67474621	rs2797543	A	G	72701100	0.4761	6.049e-10	-6.189	0.782704	NEGR1	0	intronic	6.741	5	5	1
1	7	rs67474621	rs1194271	A	G	72701965	0.4761	9.95e-10	6.11	0.769997	NEGR1	0	intronic	0.218	NA	5	1
1	7	rs67474621	rs1209251	C	G	72701991	0.4761	9.478e-10	6.118	0.769997	NEGR1	0	intronic	1.165	7	5	1
1	7	rs67474621	rs1194270	T	C	72702313	0.4761	5.658e-10	6.2	0.769997	NEGR1	0	intronic	0.66	NA	5	1
1	7	rs67474621	rs1194269	A	G	72703860	0.4751	6.514e-10	-6.177	0.773488	NEGR1	0	intronic	2.096	NA	5	1
1	7	rs67474621	rs1194267	A	G	72704526	0.4761	8.576e-10	6.134	0.769997	NEGR1	0	intronic	3.439	NA	5	1
1	7	rs67474621	rs1194265	A	G	72707226	0.4761	9.003e-10	6.126	0.769997	NEGR1	0	intronic	1.995	NA	7	1
1	7	rs67474621	rs1194263	C	G	72708154	0.4751	8.656e-10	-6.132	0.773488	NEGR1	0	intronic	0.077	6	15	1
1	7	rs67474621	rs1026567	A	G	72708584	0.4761	8.96e-10	6.127	0.769997	NEGR1	0	intronic	0.346	NA	15	1
1	7	rs67474621	rs1026566	A	G	72709042	0.4751	8.357e-10	-6.138	0.773488	NEGR1	0	intronic	0.987	NA	14	1
1	7	rs77944304	rs17525406	A	G	72712003	0.2406	1.977e-09	6	0.917501	NEGR1	0	intronic	4.337	6	5	0
1	7	rs77944304	rs2066416	T	C	72712404	0.2624	3.573e-09	-5.903	0.828654	NEGR1	0	intronic	2.25	NA	5	1
1	7	rs67474621	rs1194284	A	C	72712529	0.4761	7.925e-10	6.146	0.769997	NEGR1	0	intronic	0.627	NA	5	1
1	7	rs67474621	rs2126077	A	T	72712607	0.4563	2.92e-10	6.303	0.70838	NEGR1	0	intronic	0.787	6	5	1
1	7	rs67474621	rs1194283	T	C	72713037	0.4761	8.048e-10	-6.144	0.769997	NEGR1	0	intronic	2.682	NA	5	1
1	7	rs67474621	rs1194282	T	C	72713559	0.4771	5.696e-10	6.199	0.779173	NEGR1	0	intronic	0.238	NA	4	1
1	7	rs67474621	rs1194281	T	C	72714003	0.4761	8.005e-10	6.145	0.769997	NEGR1	0	intronic	0.072	NA	5	1
1	7	rs67474621	rs1194278	T	C	72714220	0.4761	4.076e-10	-6.251	0.769997	NEGR1	0	intronic	0.251	NA	5	1
1	7	rs67474621	rs1194277	C	G	72714331	0.4771	4.94e-10	6.221	0.779173	NEGR1	0	intronic	0.665	6	5	1
1	7	rs1620977	rs1620977	A	G	72729142	0.2903	2.715e-11	6.661	1	NEGR1	0	intronic	2.976	6	5	1
1	7	rs34305371	rs34305371	A	G	72733610	0.08748	1.297e-08	5.686	1	NEGR1	0	intronic	0.862	6	5	1
1	7	rs34305371	rs12127789	T	G	72740073	0.1113	2.229e-08	5.593	0.759781	NEGR1	0	intronic	1.487	5	5	1
1	7	rs11209943	rs3101339	A	C	72748669	0.3598	8.629e-11	-6.489	0.995413	NEGR1	0	upstream	9.281	NA	1	1
1	7	rs3101338	rs76659454	A	G	72749726	0.162	2.348e-10	-6.337	0.85771	NEGR1	1309	intergenic	9.674	4	1	1
1	7	rs3101338	rs3128341	T	C	72749848	0.1839	1.495e-11	-6.748	1	NEGR1	1431	intergenic	4.798	4	1	1
1	7	rs3101338	rs3101338	A	C	72750353	0.1839	1.076e-11	6.796	1	NEGR1	1936	intergenic	8.741	NA	1	1
1	7	rs11209943	rs11209943	A	G	72750500	0.3588	5.916e-11	-6.546	1	NEGR1	2083	intergenic	17.11	4	1	1
1	7	rs11209943	rs3101337	T	C	72751134	0.3588	1.617e-10	6.394	0.990758	NEGR1	2717	intergenic	8.458	NA	1	1
1	7	rs11209943	rs3101336	T	C	72751185	0.3588	1.079e-10	-6.455	0.990758	NEGR1	2768	intergenic	7.807	NA	1	1
1	7	rs11209943	rs2815765	T	C	72752230	0.3588	1.809e-10	-6.377	0.990758	NEGR1	3813	intergenic	8.062	NA	5	1
1	7	rs11209943	rs2568952	C	G	72755105	0.3588	1.683e-10	-6.388	0.990758	NEGR1	6688	intergenic	1.724	5	5	1
1	7	rs3101338	rs9424979	A	G	72755277	0.2495	NA	NA	0.662197	NEGR1	6860	intergenic	1.118	6	2	1
1	7	rs3101338	rs17526367	T	C	72756049	0.2425	7.607e-09	-5.777	0.637922	NEGR1	7632	intergenic	0.027	5	7	1
1	7	rs3101338	rs12135603	T	G	72758237	0.2425	1.443e-08	-5.668	0.637922	RPL31P12	8918	intergenic	1.213	6	14	1
1	7	rs3101338	rs72942968	T	C	72758366	0.2425	6.962e-09	-5.792	0.637922	RPL31P12	8789	intergenic	0.558	5	14	1
1	7	rs11209943	rs2613492	C	T	72758984	0.2435	NA	NA	0.639593	RPL31P12	8171	intergenic	8.198	NA	9	1
1	7	rs3101338	rs9424980	A	G	72759437	0.2425	7.055e-09	5.79	0.637922	RPL31P12	7718	intergenic	1.941	7	9	1
1	7	rs11209943	rs2815759	A	G	72760537	0.2445	1.8e-08	5.63	0.643202	RPL31P12	6618	intergenic	1.221	NA	9	1
1	7	rs11209943	rs2568955	T	C	72762169	0.2445	4.964e-09	-5.848	0.643202	RPL31P12	4986	intergenic	0.922	5	7	1
1	7	rs11209943	rs9425087	A	G	72763457	0.2435	1.26e-08	5.691	0.641277	RPL31P12	3698	intergenic	1.644	6	7	1
1	7	rs11209943	rs2568956	T	C	72764376	0.3588	1.336e-10	-6.423	0.990758	RPL31P12	2779	intergenic	2.759	7	14	1
1	7	rs3101338	rs9425089	A	C	72765082	0.1839	1.276e-11	6.771	1	RPL31P12	2073	intergenic	0.753	7	14	1
1	7	rs11209943	rs2568958	A	G	72765116	0.3579	1.821e-10	6.376	0.986178	RPL31P12	2039	intergenic	1.589	7	14	1
1	7	rs3101338	rs9425090	A	G	72765300	0.1839	1.448e-11	-6.753	1	RPL31P12	1855	intergenic	0.662	7	14	1
1	7	rs3101338	rs9424981	T	C	72766085	0.1839	1.359e-11	6.762	1	RPL31P12	1070	intergenic	1.741	6	14	1
1	7	rs11209943	rs11209948	T	G	72811904	0.3588	2.066e-10	6.356	0.990758	RPL31P12	44392	intergenic	0.862	6	5	1
1	7	rs3101338	rs78095791	A	G	72811957	0.1839	1.283e-11	6.771	1	RPL31P12	44445	intergenic	1.601	5	5	1
1	7	rs11209943	rs2568960	A	G	72812249	0.3588	2.241e-10	-6.344	0.990758	RPL31P12	44737	intergenic	1.327	4	5	1
1	7	rs11209943	rs2815753	A	G	72812324	0.3588	8.352e-11	6.494	0.990758	RPL31P12	44812	intergenic	3.414	NA	5	1
1	7	rs11209943	rs2815752	A	G	72812440	0.3588	9.851e-11	6.469	0.990758	RPL31P12	44928	intergenic	9.442	NA	5	1
1	7	rs11209943	rs2613494	A	G	72812657	0.3588	1.305e-10	-6.427	0.990758	RPL31P12	45145	intergenic	1.708	NA	5	1
1	7	rs11209943	rs2568961	T	C	72812747	0.3588	1.471e-10	6.408	0.990758	RPL31P12	45235	intergenic	1.201	7	5	1
1	7	rs3101338	rs6682389	T	C	72813057	0.1839	1.115e-11	-6.791	1	RPL31P12	45545	intergenic	0.306	7	5	1
1	7	rs11209943	rs1460943	T	C	72813129	0.3588	1.314e-10	6.426	0.990758	RPL31P12	45617	intergenic	0.218	NA	5	1
1	7	rs11209943	rs1432639	A	C	72813218	0.3588	1.093e-10	6.454	0.990758	RPL31P12	45706	intergenic	1.467	7	5	1
1	7	rs11209943	rs1460942	A	T	72813256	0.3588	1.223e-10	-6.437	0.990758	RPL31P12	45744	intergenic	0.947	7	5	1
1	7	rs3101338	rs6690399	A	T	72817099	0.167	8.124e-11	6.498	0.849017	RPL31P12	49587	intergenic	0.837	6	15	1
1	7	rs3101338	rs17526561	A	C	72818226	0.167	7.675e-11	-6.507	0.849017	RPL31P12	50714	intergenic	4.652	7	15	1
1	7	rs3101338	rs6697541	A	G	72819360	0.1839	1.907e-11	6.713	0.95936	RPL31P12	51848	intergenic	1.278	6	14	1
1	7	rs11209943	rs2012697	T	C	72819612	0.3648	1.077e-10	-6.456	0.936434	RPL31P12	52100	intergenic	1.092	6	14	1
1	7	rs3101338	rs74967575	A	T	72819888	0.164	2.959e-10	-6.301	0.830074	RPL31P12	52376	intergenic	5.978	6	14	1
1	7	rs3101338	rs12137749	A	G	72820709	0.1839	1.515e-11	-6.746	0.95936	RPL31P12	53197	intergenic	2.063	6	15	1
1	7	rs3101338	rs12143571	A	T	72822096	0.167	7.702e-11	-6.506	0.849017	RPL31P12	54584	intergenic	4.741	6	15	1
1	7	rs3101338	rs12117438	A	G	72822479	0.167	7.774e-11	6.505	0.849017	RPL31P12	54967	intergenic	14.87	7	15	1
1	7	rs11209943	rs990871	T	C	72823713	0.3648	1.37e-10	6.419	0.936434	RPL31P12	56201	intergenic	0.419	6	7	1
1	7	rs11209943	rs6661921	A	G	72824855	0.3648	1.561e-10	6.399	0.936434	RPL31P12	57343	intergenic	1.13	7	15	1
1	7	rs11209943	rs6687024	T	C	72824860	0.3648	1.395e-10	6.416	0.936434	RPL31P12	57348	intergenic	0.713	7	15	1
1	7	rs11209943	rs6699744	A	T	72825144	0.3549	NA	NA	0.933642	RPL31P12	57632	intergenic	4.488	6	15	1
1	7	rs3101338	rs12143898	A	G	72826172	0.1839	1.344e-11	-6.764	0.95936	RPL31P12	58660	intergenic	1.384	7	15	1
1	7	rs3101338	rs6660464	T	C	72826949	0.1839	1.389e-11	6.759	0.95936	RPL31P12	59437	intergenic	1.29	7	9	1
1	7	rs3101338	rs12139531	A	G	72827776	0.1829	1.534e-11	-6.745	0.952644	RPL31P12	60264	intergenic	1.087	6	9	1
1	7	rs3101338	rs12144335	T	C	72828183	0.167	7.775e-11	6.505	0.849017	RPL31P12	60671	intergenic	1.672	6	15	1
1	7	rs11209943	rs10889947	T	C	72828221	0.3698	1.037e-10	-6.461	0.916555	RPL31P12	60709	intergenic	4.984	6	15	1
1	7	rs114030538	rs115720372	T	G	72829015	0.0497	3.795e-06	4.622	0.625849	RPL31P12	61503	intergenic	10.53	7	15	0
1	7	rs3101338	rs11581382	T	C	72829347	0.167	7.137e-11	-6.518	0.849017	RPL31P12	61835	intergenic	0.387	7	15	1
1	7	rs3101338	rs11581403	T	C	72829530	0.167	8.238e-11	-6.496	0.849017	RPL31P12	62018	intergenic	4.779	7	15	1
1	7	rs3101338	rs11588959	T	G	72829623	0.167	7.885e-11	-6.503	0.849017	RPL31P12	62111	intergenic	0.202	6	15	1
1	7	rs11209943	rs11209950	A	T	72829680	0.3648	1.134e-10	-6.448	0.936434	RPL31P12	62168	intergenic	3.219	6	15	1
1	7	rs3101338	rs11581447	A	C	72829683	0.1849	1.198e-11	-6.78	0.952705	RPL31P12	62171	intergenic	4.177	6	15	1
1	7	rs3101338	rs72943001	T	C	72831388	0.167	9.498e-11	-6.475	0.849017	RPL31P12	63876	intergenic	3.077	5	7	1
1	7	rs3101338	rs12123328	A	G	72833201	0.1839	1.435e-11	6.754	0.95936	RPL31P12	65689	intergenic	1.927	6	5	1
1	7	rs3101338	rs60012417	T	C	72834023	0.1849	1.526e-11	-6.745	0.95299	RPL31P12	66511	intergenic	2.889	6	5	1
1	7	rs3101338	rs12117250	T	G	72834799	0.1839	1.51e-11	-6.747	0.95936	RPL31P12	67287	intergenic	1.651	6	5	1
1	7	rs11209943	rs1841499	A	T	72836456	0.3648	1.087e-10	-6.454	0.936434	RPL31P12	68944	intergenic	1.454	6	5	1
1	7	rs11209943	rs7531118	T	C	72837239	0.4463	1.772e-10	-6.38	0.680847	RPL31P12	69727	intergenic	11.07	4	5	1
1	7	rs11209943	rs11209951	T	C	72837490	0.3648	1.086e-10	6.454	0.936434	RPL31P12	69978	intergenic	4.675	4	5	1
1	7	rs11209943	rs11209952	T	C	72837500	0.3638	1.05e-10	6.46	0.931921	RPL31P12	69988	intergenic	5.828	4	5	1
1	7	rs3101338	rs72945107	T	G	72838186	0.1839	1.537e-11	-6.744	0.95936	RPL31P12	70674	intergenic	0.285	7	5	1
1	7	rs3101338	rs112657490	A	G	72838345	0.1839	1.653e-11	-6.734	0.95936	RPL31P12	70833	intergenic	0.821	6	5	1
1	7	rs11209943	rs10789336	A	G	72838406	0.3648	9.274e-11	6.478	0.936434	RPL31P12	70894	intergenic	1.653	7	5	1
1	7	rs3101338	rs4322186	T	G	72838561	0.1839	3.035e-11	-6.645	0.95936	RPL31P12	71049	intergenic	0.489	7	5	1
1	7	rs3101338	rs1903376	T	C	72839905	0.1839	2.721e-11	-6.661	0.95936	RPL31P12	72393	intergenic	2.053	NA	5	1
1	7	rs3101338	rs1903374	A	G	72840051	0.1839	1.427e-11	-6.755	0.95936	RPL31P12	72539	intergenic	0.799	NA	5	1
1	7	rs3101338	rs79547900	A	G	72841201	0.1839	1.386e-11	-6.759	0.95936	RPL31P12	73689	intergenic	19.85	6	7	1
1	7	rs3101338	rs12120564	T	C	72843946	0.168	1.002e-10	6.467	0.842182	RPL31P12	76434	intergenic	2.834	6	15	1
1	7	rs3101338	rs12131707	T	C	72844293	0.2008	1.891e-10	-6.37	0.846585	RPL31P12	76781	intergenic	0.132	7	15	1
1	7	rs3101338	rs2999987	T	C	72844514	0.1849	1.278e-11	6.771	0.939389	RPL31P12	77002	intergenic	1.636	7	9	1
1	7	rs3101338	rs72945111	T	C	72845176	0.1759	1.338e-09	6.063	0.853442	RPL31P12	77664	intergenic	1.143	6	9	1
1	7	rs3101338	rs72945113	T	C	72845264	0.1759	5.773e-10	6.197	0.853442	RPL31P12	77752	intergenic	8.376	5	9	1
1	7	rs34305371	rs12724444	A	G	72904288	0.09344	7.765e-08	5.373	0.786656	RPL31P12	136776	intergenic	9.486	4	2	1
1	7	rs11209943	rs10789340	A	G	72940273	0.335	8.269e-05	-3.936	0.664375	RPL31P12	172761	intergenic	0.395	6	7	1
1	8	rs7534501	rs6593680	A	G	96169760	0.4612	2.461e-06	-4.711	0.658366	RP11-286B14.1	0	ncRNA_intronic	2.999	7	9	0
1	8	rs7534501	rs34952653	C	G	96170727	0.4632	2.509e-06	-4.707	0.652061	RP11-286B14.1	0	ncRNA_intronic	4.614	6	9	0
1	8	rs7534501	rs34496282	T	C	96171104	0.4622	2.882e-06	4.679	0.655886	RP11-286B14.1	0	ncRNA_intronic	1.065	7	9	0
1	8	rs7534501	rs1931262	T	C	96174912	0.4771	5.516e-09	5.831	0.865195	RP11-286B14.1	0	ncRNA_intronic	1.963	6	9	0
1	8	rs7534501	rs1931263	T	G	96175101	0.4761	3.55e-09	-5.904	0.861217	RP11-286B14.1	0	ncRNA_intronic	0.655	7	9	0
1	8	rs7534501	rs10874938	A	T	96175936	0.4722	1.77e-09	6.018	0.87572	RP11-286B14.1	0	ncRNA_intronic	1.626	5	9	0
1	8	rs7534501	rs6678734	A	G	96176563	0.4781	2.258e-09	5.978	0.869698	RP11-286B14.1	0	ncRNA_intronic	1.577	6	7	0
1	8	rs7534501	rs12128772	A	G	96176709	0.4761	1.981e-09	-5.999	0.876879	RP11-286B14.1	0	ncRNA_intronic	2.388	6	7	0
1	8	rs7534501	rs12128864	C	G	96177014	0.4761	1.866e-09	-6.009	0.876879	RP11-286B14.1	0	ncRNA_intronic	0.631	7	5	0
1	8	rs7534501	rs34701878	A	G	96177073	0.4761	1.848e-09	6.011	0.876879	RP11-286B14.1	0	ncRNA_intronic	5.783	7	5	0
1	8	rs7534501	rs1931245	A	G	96178537	0.4742	2.535e-09	5.959	0.884155	RP11-286B14.1	0	ncRNA_intronic	3.917	6	15	0
1	8	rs7534501	rs11583189	A	T	96180192	0.4722	3.133e-09	-5.924	0.87572	RP11-286B14.1	0	ncRNA_intronic	4.613	7	15	0
1	8	rs7534501	rs1931252	A	C	96182043	0.4751	2.936e-09	-5.935	0.880731	RP11-286B14.1	0	ncRNA_intronic	8.243	4	7	0
1	8	rs7534501	rs1931253	A	G	96182063	0.4722	4.023e-09	-5.883	0.891938	RP11-286B14.1	0	ncRNA_intronic	6.494	2c	7	0
1	8	rs7534501	rs713456	A	C	96184729	0.4722	4.381e-09	-5.869	0.87572	RP11-286B14.1	0	ncRNA_intronic	0.855	NA	5	0
1	8	rs7534501	rs11165471	A	G	96184838	0.4751	4.165e-09	-5.877	0.880731	RP11-286B14.1	0	ncRNA_intronic	2.711	7	5	0
1	8	rs7534501	rs953401	A	G	96186671	0.4702	3.977e-09	-5.885	0.883558	RP11-286B14.1	0	ncRNA_intronic	1.714	NA	5	0
1	8	rs7534501	rs59172799	A	G	96187116	0.4732	3.742e-09	-5.895	0.8723	RP11-286B14.1	0	ncRNA_intronic	3.207	6	5	0
1	8	rs7534501	rs11583841	A	C	96187876	0.4751	2.564e-09	5.957	0.880731	RP11-286B14.1	0	ncRNA_intronic	0.463	7	5	0
1	8	rs7534501	rs2210636	A	G	96189879	0.4702	NA	NA	0.883558	RP11-286B14.1	0	ncRNA_intronic	1.354	7	5	0
1	8	rs7534501	rs12134520	A	G	96190605	0.4722	4.735e-09	5.856	0.891938	RP11-286B14.1	0	ncRNA_intronic	0.167	7	5	0
1	8	rs7534501	rs12725094	C	G	96191837	0.4682	2.296e-09	5.975	0.891019	RP11-286B14.1	0	ncRNA_intronic	1.013	6	5	0
1	8	rs7534501	rs6662729	A	G	96195563	0.4732	4.469e-09	-5.866	0.8723	RP11-286B14.1	0	ncRNA_intronic	1.35	6	5	0
1	8	rs7534501	rs6672864	C	G	96196096	0.4702	3.646e-09	5.9	0.883558	RP11-286B14.1	0	ncRNA_intronic	3.897	7	5	0
1	8	rs7534501	rs11586170	T	C	96196776	0.4682	3.972e-09	5.885	0.891019	RP11-286B14.1	0	ncRNA_intronic	0.592	4	5	0
1	8	rs7534501	rs1931243	C	G	96199038	0.4722	4.793e-09	-5.854	0.891527	RP11-286B14.1	0	ncRNA_intronic	0.727	7	5	0
1	8	rs7534501	rs6668048	T	C	96199657	0.4702	3.519e-09	-5.905	0.899375	RP11-286B14.1	0	ncRNA_intronic	4.821	6	7	0
1	8	rs7534501	rs6668127	T	C	96199696	0.4732	3.452e-09	-5.909	0.888039	RP11-286B14.1	0	ncRNA_intronic	3.043	7	7	0
1	8	rs7534501	rs11165472	A	T	96200401	0.4732	4.857e-09	5.852	0.895961	RP11-286B14.1	0	ncRNA_intronic	3.006	5	9	0
1	8	rs7534501	rs12134151	C	G	96202443	0.4831	4.693e-09	-5.858	0.844127	RP11-286B14.1	0	ncRNA_intronic	0.428	6	9	0
1	8	rs7534501	rs35305395	A	G	96207656	0.4543	1.1e-09	6.094	0.954894	RP11-286B14.1	0	ncRNA_intronic	1.845	6	5	0
1	8	rs7534501	rs7534501	A	G	96221514	0.4573	9.351e-10	-6.12	1	ENSG00000271252:RP11-286B14.1	0	ncRNA_intronic:ncRNA_intronic	1.394	6	5	0
1	8	rs7534501	rs6690195	T	C	96221653	0.4722	7.584e-09	-5.777	0.939609	ENSG00000271252:RP11-286B14.1	0	ncRNA_intronic:ncRNA_intronic	7.832	7	9	0
1	9	rs516902	rs321586	T	C	96685666	0.2803	9.632e-09	-5.737	0.660923	RNU1-130P	5791	intergenic	6.135	NA	5	0
1	9	rs516902	rs321588	A	G	96688818	0.2823	9.999e-09	-5.731	0.651315	RNU1-130P	2639	intergenic	6.096	NA	9	0
1	9	rs516902	rs321589	T	C	96689536	0.2813	NA	NA	0.657146	RNU1-130P	1921	intergenic	1.223	NA	9	0
1	9	rs516902	rs4498848	A	G	96690250	0.3191	9.603e-07	-4.9	0.796773	RNU1-130P	1207	intergenic	1.539	7	9	0
1	9	rs516902	rs613614	A	G	96693878	0.2753	6.617e-09	-5.8	0.683658	RNU1-130P	2262	intergenic	0.159	NA	14	0
1	9	rs516902	rs516902	T	C	96700020	0.3459	1.218e-09	-6.078	1	RNU1-130P	8404	intergenic	8.976	2b	5	0
1	9	rs516902	rs615340	T	C	96700073	0.3101	3.65e-08	-5.507	0.838552	RNU1-130P	8457	intergenic	1.898	NA	5	0
1	9	rs516902	rs601557	A	G	96700878	0.3449	2.67e-09	-5.951	0.995655	RNU1-130P	9262	intergenic	1.165	NA	5	0
1	9	rs516902	rs574735	A	G	96701718	0.3459	2.704e-09	-5.949	1	RNU1-130P	10102	intergenic	6.95	5	5	0
1	9	rs516902	rs524830	A	G	96703726	0.3459	3.799e-09	5.893	1	RNU1-130P	12110	intergenic	7.439	6	5	0
1	9	rs516902	rs652056	T	C	96704420	0.3459	3.107e-09	-5.926	1	RNU1-130P	12804	intergenic	0.798	NA	5	0
1	9	rs516902	rs651499	A	T	96704585	0.3588	5.093e-09	-5.844	0.936652	RNU1-130P	12969	intergenic	2.834	5	5	0
1	9	rs516902	rs11165566	T	C	96704827	0.3072	1.048e-06	-4.882	0.844382	RNU1-130P	13211	intergenic	1.369	7	5	0
1	9	rs516902	rs12032831	T	C	96705208	0.2704	2.236e-05	4.24	0.689643	RNU1-130P	13592	intergenic	9.696	7	5	0
1	9	rs516902	rs647867	A	G	96705330	0.3459	2.965e-09	5.934	1	RNU1-130P	13714	intergenic	0.631	NA	5	0
1	9	rs516902	rs9660411	C	G	96706863	0.3072	NA	NA	0.844382	RP5-898J17.1	12762	intergenic	3.71	6	5	0
1	9	rs516902	rs61789676	G	C	96707508	0.3539	NA	NA	0.965762	RP5-898J17.1	12117	intergenic	8.436	7	5	0
1	9	rs516902	rs61789682	C	T	96708617	0.3459	NA	NA	1	RP5-898J17.1	11008	intergenic	1.01	7	14	0
1	9	rs516902	rs75566514	C	T	96708810	0.3459	NA	NA	1	RP5-898J17.1	10815	intergenic	0.452	7	14	0
1	9	rs516902	rs9659182	C	T	96709275	0.3489	NA	NA	0.987007	RP5-898J17.1	10350	intergenic	4.355	7	14	0
1	9	rs516902	rs9659200	C	T	96709475	0.3469	NA	NA	0.995648	RP5-898J17.1	10150	intergenic	3.126	6	14	0
1	9	rs516902	rs9659207	C	T	96709484	0.3469	NA	NA	0.995648	RP5-898J17.1	10141	intergenic	3.434	6	14	0
1	9	rs516902	rs9660527	T	C	96709522	0.3459	NA	NA	1	RP5-898J17.1	10103	intergenic	4.072	6	14	0
1	9	rs516902	rs9661283	G	T	96709627	0.3459	NA	NA	1	RP5-898J17.1	9998	intergenic	0.145	7	14	0
1	9	rs516902	rs74658983	G	T	96710096	0.3459	NA	NA	1	RP5-898J17.1	9529	intergenic	0.261	7	14	0
1	9	rs516902	rs77095828	T	C	96710203	0.3489	NA	NA	0.987007	RP5-898J17.1	9422	intergenic	0.845	6	14	0
1	9	rs516902	rs28865633	T	G	96710265	0.3489	NA	NA	0.987007	RP5-898J17.1	9360	intergenic	1.344	6	14	0
1	9	rs516902	rs200082022	T	C	96710811	0.3082	NA	NA	0.839511	RP5-898J17.1	8814	intergenic	0.753	7	14	0
1	9	rs516902	rs201281861	T	C	96711358	0.2962	NA	NA	0.798192	RP5-898J17.1	8267	intergenic	0.724	6	14	0
1	9	rs516902	rs199786982	T	C	96711365	0.2962	NA	NA	0.798192	RP5-898J17.1	8260	intergenic	1.056	6	14	0
1	9	rs516902	rs200942625	G	A	96711383	0.3459	NA	NA	1	RP5-898J17.1	8242	intergenic	0.39	6	14	0
1	9	rs516902	rs146428892	T	C	96711484	0.3459	NA	NA	1	RP5-898J17.1	8141	intergenic	0.808	7	14	0
1	9	rs516902	rs74792543	C	A	96711877	0.3459	NA	NA	1	RP5-898J17.1	7748	intergenic	1.359	7	9	0
1	9	rs516902	rs474999	T	G	96712329	0.3469	NA	NA	0.995679	RP5-898J17.1	7296	intergenic	1.778	7	9	0
1	9	rs516902	rs638380	G	A	96712340	0.3469	NA	NA	0.995679	RP5-898J17.1	7285	intergenic	0.776	6	9	0
1	9	rs516902	rs498154	A	G	96712521	0.3459	NA	NA	1	RP5-898J17.1	7104	intergenic	0.587	7	9	0
1	9	rs516902	rs502505	A	G	96712930	0.3459	2.82e-09	-5.942	1	RP5-898J17.1	6695	intergenic	0.958	7	7	0
1	9	rs516902	rs608948	T	C	96713784	0.3459	2.242e-09	-5.979	1	RP5-898J17.1	5841	intergenic	1.789	NA	5	0
1	9	rs516902	rs534693	A	G	96714198	0.3459	2.863e-09	5.939	1	RP5-898J17.1	5427	intergenic	7.85	NA	5	0
1	9	rs516902	rs324859	A	T	96714511	0.3072	9.045e-07	4.911	0.844382	RP5-898J17.1	5114	intergenic	11.27	6	5	0
1	9	rs516902	rs2219909	A	G	96714602	0.3459	2.372e-09	5.97	1	RP5-898J17.1	5023	intergenic	14.16	NA	5	0
1	9	rs516902	rs324860	T	C	96714996	0.3072	9.957e-07	-4.892	0.844382	RP5-898J17.1	4629	intergenic	14.39	NA	5	0
1	9	rs516902	rs681950	T	C	96715123	0.3459	2.157e-09	-5.986	1	RP5-898J17.1	4502	intergenic	0.023	NA	5	0
1	9	rs516902	rs610263	A	G	96715315	0.3459	2.219e-09	-5.981	1	RP5-898J17.1	4310	intergenic	3.475	NA	5	0
1	9	rs516902	rs668401	T	C	96715798	0.3459	2.204e-09	-5.982	1	RP5-898J17.1	3827	intergenic	1.384	NA	5	0
1	9	rs516902	rs668342	C	G	96715836	0.3459	2.409e-09	5.967	1	RP5-898J17.1	3789	intergenic	2.764	6	5	0
1	9	rs516902	rs1386305	A	G	96717156	0.3459	2.431e-09	5.966	1	RP5-898J17.1	2469	intergenic	1.909	NA	5	0
1	9	rs516902	rs971157	C	G	96717849	0.3459	2.791e-09	5.943	1	RP5-898J17.1	1776	intergenic	5.419	5	7	0
1	9	rs516902	rs971156	T	C	96717936	0.3459	1.926e-09	6.004	1	RP5-898J17.1	1689	intergenic	4.309	NA	7	0
1	9	rs516902	rs321591	A	G	96718961	0.3459	2.527e-09	-5.96	1	RP5-898J17.1	0	downstream	5.493	3a	2	0
1	9	rs516902	rs321592	T	C	96719266	0.3459	2.363e-09	5.971	1	RP5-898J17.1	0	downstream	2.183	NA	1	0
1	9	rs516902	rs324864	A	G	96719892	0.2704	2.107e-05	-4.253	0.689643	RP5-898J17.1	0	ncRNA_exonic	5.974	NA	2	0
1	9	rs516902	rs321593	T	C	96720302	0.3469	2.526e-09	5.96	0.995648	RP5-898J17.1	0	ncRNA_exonic	1.337	7	2	0
1	9	rs516902	rs9662580	A	G	96724741	0.3469	2.517e-09	-5.96	0.995648	RP5-898J17.1	0	ncRNA_intronic	12.29	5	7	0
1	9	rs516902	rs161996	C	T	96727795	0.3449	NA	NA	0.978252	RP5-898J17.1	0	ncRNA_intronic	1.09	7	14	0
1	9	rs516902	rs161998	T	G	96728392	0.3469	3.362e-09	-5.913	0.995648	RP5-898J17.1	0	ncRNA_intronic	7.802	7	14	0
1	9	rs516902	rs504399	A	C	96732885	0.3469	4.007e-09	5.884	0.995648	RP5-898J17.1	0	ncRNA_intronic	11	6	15	0
1	9	rs516902	rs644590	A	T	96733579	0.3469	2.659e-09	5.951	0.995648	RP5-898J17.1	0	ncRNA_intronic	1.777	7	15	0
1	9	rs516902	rs660290	A	G	96734737	0.3459	3.83e-09	5.891	0.991294	RP5-898J17.1	0	ncRNA_intronic	2.569	7	15	0
1	9	rs516902	rs675043	T	C	96735736	0.3459	4.585e-09	5.862	0.991294	RP5-898J17.1	0	ncRNA_intronic	5.875	7	15	0
1	9	rs516902	rs321547	A	G	96738338	0.3459	4.394e-09	-5.869	0.991294	RP5-898J17.1	0	ncRNA_intronic	5.89	7	5	0
1	9	rs516902	rs324853	T	C	96738789	0.3072	1.8e-06	-4.775	0.83601	RP5-898J17.1	0	ncRNA_intronic	1.474	7	5	0
1	9	rs516902	rs324854	T	C	96738972	0.3072	1.85e-06	-4.769	0.83601	RP5-898J17.1	0	ncRNA_intronic	11.24	7	5	0
1	9	rs516902	rs9660195	A	T	96744164	0.3459	4.589e-09	-5.861	0.991294	RP5-898J17.1	0	ncRNA_intronic	6.637	6	9	0
1	9	rs516902	rs161989	A	G	96749714	0.3469	4.6e-09	5.861	0.987022	RP5-898J17.1	0	ncRNA_intronic	0.136	7	9	0
1	9	rs516902	rs161992	A	G	96754566	0.3469	7.107e-09	-5.788	0.987022	RP5-898J17.1	0	ncRNA_intronic	4.976	7	5	0
1	9	rs516902	rs11165579	A	G	96759720	0.2773	0.0001005	-3.889	0.702016	RP5-898J17.1	0	ncRNA_intronic	5.743	7	5	0
1	9	rs516902	rs676097	A	G	96763824	0.3469	9.594e-09	5.738	0.987022	RP5-898J17.1	0	ncRNA_intronic	7.947	NA	5	0
1	9	rs516902	rs161671	A	C	96766417	0.3887	NA	NA	0.759871	RP5-898J17.1	0	ncRNA_intronic	0.82	NA	5	0
1	9	rs516902	rs161987	A	G	96766802	0.3469	1.769e-08	5.633	0.987022	RP5-898J17.1	0	ncRNA_intronic	1.354	NA	5	0
1	9	rs516902	rs161985	A	G	96770685	0.3469	1.265e-08	5.691	0.987022	RP5-898J17.1	0	ncRNA_intronic	0.401	NA	5	0
1	9	rs516902	rs184470	T	C	96772320	0.3469	1.507e-08	5.661	0.987022	RP5-898J17.1	0	ncRNA_intronic	0.802	5	2	0
1	9	rs516902	rs326651	T	C	96777210	0.3469	1.344e-08	5.68	0.987022	RP5-898J17.1	0	ncRNA_intronic	1.445	6	5	0
1	9	rs516902	rs326653	A	T	96778004	0.3469	8.514e-09	-5.758	0.987022	RP5-898J17.1	0	ncRNA_intronic	6.479	6	5	0
1	9	rs516902	rs326655	A	T	96780031	0.331	3.943e-08	5.493	0.928098	RP5-898J17.1	0	ncRNA_intronic	0.103	6	5	0
1	9	rs516902	rs10874997	T	G	96782403	0.3469	1.585e-08	-5.652	0.987022	RP5-898J17.1	0	ncRNA_intronic	0.653	7	5	0
1	9	rs516902	rs326679	T	C	96785035	0.3469	1.545e-08	-5.657	0.987022	RP5-898J17.1	0	ncRNA_intronic	0.007	7	5	0
1	9	rs516902	rs326678	A	G	96786632	0.3469	1.472e-08	5.665	0.987022	RP5-898J17.1	0	ncRNA_intronic	1.889	NA	5	0
1	9	rs516902	rs326674	T	C	96790933	0.3469	1.551e-08	5.656	0.987022	RP5-898J17.1	0	ncRNA_intronic	8.969	7	15	0
1	9	rs516902	rs326672	A	G	96795795	0.3469	1.352e-08	5.679	0.987022	RP5-898J17.1	0	ncRNA_intronic	5.044	6	5	0
1	9	rs516902	rs326671	T	C	96797807	0.3459	1.354e-08	-5.679	0.982721	RP5-898J17.1	0	ncRNA_intronic	4.239	NA	5	0
1	9	rs516902	rs149371	T	C	96799629	0.3459	1.314e-08	-5.684	0.982721	RP5-898J17.1	0	ncRNA_intronic	0.451	NA	7	0
1	9	rs516902	rs161795	A	G	96802577	0.3469	1.549e-08	-5.656	0.987022	RP5-898J17.1	0	ncRNA_intronic	0.411	NA	14	0
1	9	rs516902	rs161982	C	G	96805998	0.3469	1.729e-08	5.637	0.987022	RP5-898J17.1	0	ncRNA_intronic	1.199	6	14	0
1	9	rs516902	rs325953	T	C	96818456	0.341	2.258e-08	-5.591	0.961326	RP5-898J17.1	0	ncRNA_intronic	5.202	5	14	0
1	9	rs516902	rs170533	T	G	96819655	0.3419	2.8e-08	-5.554	0.956943	RP5-898J17.1	0	ncRNA_intronic	1.026	NA	14	0
1	9	rs516902	rs325951	A	G	96819907	0.3419	3.063e-08	-5.538	0.956943	RP5-898J17.1	0	ncRNA_intronic	3.314	NA	14	0
1	9	rs516902	rs325950	A	C	96823086	0.3419	3.337e-08	-5.523	0.956943	RP5-898J17.1	0	ncRNA_intronic	5.435	2b	5	0
1	9	rs516902	rs325947	A	C	96829870	0.341	3.896e-08	5.495	0.952789	RP5-898J17.1	0	ncRNA_intronic	2.141	NA	5	0
1	9	rs516902	rs192990	A	G	96830775	0.341	3.838e-08	-5.498	0.952789	RP5-898J17.1	0	ncRNA_intronic	3.701	NA	5	0
1	9	rs516902	rs600169	C	G	96835538	0.34	4.04e-08	5.489	0.948667	RP5-898J17.1	0	ncRNA_intronic	4.312	6	5	0
1	9	rs516902	rs11165604	T	C	96836700	0.3519	1.231e-08	-5.695	0.882294	RP5-898J17.1	0	ncRNA_intronic	3.813	4	5	0
1	9	rs516902	rs6593592	T	C	96837661	0.3429	2.668e-09	5.951	0.877346	RP5-898J17.1	0	ncRNA_intronic	3.223	7	5	0
1	9	rs516902	rs326918	T	G	96845432	0.327	NA	NA	0.820318	RP5-898J17.1	5751	intergenic	0.262	NA	5	0
1	9	rs516902	rs111498374	T	C	96846851	0.3429	NA	NA	0.877346	RP5-898J17.1	7170	intergenic	3.312	7	5	0
1	9	rs516902	rs326911	A	G	96852354	0.3429	2.858e-09	-5.94	0.877346	ENSG00000225923	3854	intergenic	2.65	7	5	0
1	9	rs516902	rs167849	C	G	96854756	0.3429	4.162e-09	5.878	0.877346	ENSG00000225923	1452	intergenic	4.922	2b	5	0
1	9	rs516902	rs326915	T	C	96857105	0.3459	6.186e-08	-5.413	0.840452	ENSG00000225923	0	downstream	2.977	7	5	0
1	9	rs516902	rs632586	A	G	96861011	0.3449	8.772e-08	-5.35	0.836573	ENSG00000225923	4062	intergenic	3.023	7	5	0
1	9	rs516902	rs633343	T	C	96861540	0.3459	7.701e-08	5.374	0.83312	ENSG00000225923	4591	intergenic	0.045	6	7	0
1	9	rs516902	rs1222580	T	C	96861720	0.3459	6.997e-08	5.391	0.841102	ENSG00000225923	4771	intergenic	0.133	6	9	0
1	9	rs516902	rs662350	C	G	96863198	0.3469	7.561e-08	5.377	0.844991	ENSG00000225923	6249	intergenic	13.38	6	9	0
1	9	rs516902	rs567440	T	G	96870599	0.3469	2.613e-07	-5.149	0.836984	UBE2WP1	13551	intergenic	0.931	7	5	0
1	10	rs407102	rs600806	A	G	109840629	0.2714	4.872e-10	-6.223	0.812455	MYBPHL	0	intronic	4.6	NA	5	1
1	10	rs407102	rs681242	T	C	109841659	0.2624	7.396e-10	6.157	0.796137	MYBPHL	0	intronic	0.621	NA	2	1
1	10	rs407102	rs585545	A	T	109841662	0.2704	1.321e-09	6.065	0.81724	MYBPHL	0	intronic	3.345	2b	2	1
1	10	rs407102	rs680767	A	G	109841760	0.2624	7.329e-10	6.159	0.796137	MYBPHL	0	intronic	1.06	2b	2	1
1	10	rs407102	rs680434	T	C	109842271	0.2893	1.662e-09	-6.028	0.893789	MYBPHL	0	intronic	7.451	NA	2	1
1	10	rs407102	rs652651	A	G	109844532	0.2843	8.654e-10	6.132	0.925963	MYBPHL	0	intronic	2.968	NA	5	1
1	10	rs407102	rs638542	A	G	109845252	0.2863	9.758e-10	-6.113	0.925371	MYBPHL	0	intronic	1.905	NA	5	1
1	10	rs407102	rs407102	T	C	109846278	0.3012	2.134e-10	-6.351	1	MYBPHL	0	intronic	3.384	NA	5	1
1	10	rs407102	rs592107	A	T	109848726	0.2863	7.385e-10	6.158	0.934269	MYBPHL	0	intronic	2.41	4	1	1
1	10	rs407102	rs417270	T	C	109849144	0.2873	1.139e-09	6.089	0.929546	MYBPHL	0	intronic	3.898	NA	1	1
1	10	rs407102	rs443345	A	G	109849254	0.2863	1.197e-09	6.081	0.925371	MYBPHL	0	intronic	4.931	NA	1	1
1	10	rs407102	rs367586	A	C	109850122	0.2863	1.296e-09	-6.068	0.9252	MYBPHL	0	upstream	8.064	2b	2	1
1	10	rs10858096	rs413582	T	C	109851126	0.4861	1.677e-06	-4.789	0.816929	SORT1	1066	intergenic	4.733	6	4	1
1	10	rs407102	rs444387	A	G	109851127	0.2873	8.537e-10	6.135	0.929546	SORT1	1065	intergenic	0.61	6	4	1
1	10	rs407102	rs461200	A	G	109855404	0.2863	8.454e-10	-6.136	0.934269	SORT1	0	UTR3	8.394	7	4	1
1	10	rs10858096	rs464218	A	G	109856306	0.4612	1.525e-07	-5.25	0.996384	SORT1	0	UTR3	3.609	NA	4	1
1	10	rs407102	rs370088	T	C	109858119	0.2863	7.546e-10	6.154	0.934269	SORT1	0	intronic	9.787	3a	4	1
1	10	rs407102	rs3853498	T	C	109860144	0.2873	1.024e-09	6.106	0.929546	SORT1	0	intronic	3.85	7	4	1
1	10	rs407102	rs3853500	T	C	109864269	0.2873	7.808e-10	6.149	0.929546	SORT1	0	intronic	2.812	NA	4	1
1	10	rs407102	rs3853501	A	G	109864374	0.2873	7.343e-10	-6.159	0.929546	SORT1	0	intronic	3.085	3a	4	1
1	10	rs407102	rs3768497	T	C	109866230	0.2863	5.359e-10	6.208	0.934269	SORT1	0	intronic	10.74	NA	4	1
1	10	rs407102	rs3768496	A	T	109866569	0.2863	5.299e-10	-6.21	0.934269	SORT1	0	intronic	8.361	5	4	1
1	10	rs407102	rs12136140	A	G	109866844	0.2873	8.778e-10	-6.13	0.929546	SORT1	0	intronic	1.956	6	4	1
1	10	rs407102	rs12045346	A	G	109867892	0.2863	6.581e-10	6.176	0.934269	SORT1	0	intronic	0.307	7	4	1
1	10	rs407102	rs11102969	A	G	109867929	0.2873	9.071e-10	-6.125	0.929546	SORT1	0	intronic	0.375	7	4	1
1	10	rs407102	rs6695482	C	G	109870859	0.2873	8.724e-10	6.131	0.929546	SORT1	0	intronic	5.349	7	4	1
1	10	rs407102	rs10745352	T	C	109871787	0.2873	8.125e-10	6.142	0.929546	SORT1	0	intronic	3.026	7	4	1
1	10	rs407102	rs11102971	T	C	109872370	0.2873	9.217e-10	-6.122	0.929546	SORT1	0	intronic	0.739	7	4	1
1	10	rs407102	rs10735238	A	T	109872882	0.2863	6.681e-10	6.173	0.934269	SORT1	0	intronic	1.57	7	4	1
1	10	rs407102	rs61394658	A	G	109873290	0.2306	1.494e-06	4.812	0.676028	SORT1	0	intronic	5.468	6	4	1
1	10	rs407102	rs4970840	A	G	109873367	0.2863	6.771e-10	6.171	0.934269	SORT1	0	intronic	2.058	5	4	1
1	10	rs407102	rs4970749	A	G	109873573	0.2873	8.919e-10	-6.128	0.929546	SORT1	0	intronic	4.782	5	4	1
1	10	rs407102	rs12046539	T	C	109875415	0.2863	6.433e-10	-6.179	0.934269	SORT1	0	intronic	1.345	6	4	1
1	10	rs407102	rs7550401	T	C	109876885	0.2306	1.601e-06	4.798	0.676028	SORT1	0	intronic	3.475	5	4	1
1	10	rs407102	rs10745353	A	G	109877506	0.2863	7.47e-10	6.156	0.934269	SORT1	0	intronic	2.162	6	4	1
1	10	rs407102	rs4603158	T	C	109879549	0.2873	8.782e-10	-6.13	0.929546	SORT1	0	intronic	2.489	6	4	1
1	10	rs407102	rs4970841	C	G	109879892	0.2873	6.745e-10	-6.172	0.929546	SORT1	0	intronic	0.349	6	4	1
1	10	rs407102	rs4970842	A	G	109879949	0.2873	9.16e-10	6.123	0.929546	SORT1	0	intronic	1.295	7	4	1
1	10	rs407102	rs11102972	T	C	109880721	0.2306	1.526e-06	-4.808	0.676028	SORT1	0	intronic	2.676	5	4	1
1	10	rs407102	rs10858084	A	T	109882250	0.2873	9.256e-10	-6.122	0.929546	SORT1	0	intronic	4.486	6	4	1
1	10	rs407102	rs74584797	C	T	109883576	0.2992	NA	NA	0.846517	SORT1	0	intronic	3.742	7	4	0
1	10	rs407102	rs2228604	T	G	109884775	0.2873	7.598e-10	6.153	0.929546	SORT1	0	exonic	9.804	5	4	1
1	10	rs407102	rs11102973	T	G	109886310	0.2863	5.872e-10	6.194	0.934269	SORT1	0	intronic	4.804	7	4	1
1	10	rs407102	rs11102974	A	G	109886371	0.2863	6.05e-10	-6.189	0.934269	SORT1	0	intronic	1.218	7	4	1
1	10	rs407102	rs7520048	T	C	109886395	0.2873	8.687e-10	-6.132	0.929546	SORT1	0	intronic	1.732	6	4	1
1	10	rs10858096	rs4970843	T	C	109887191	0.4861	1.133e-06	4.867	0.816929	SORT1	0	intronic	2.121	6	4	1
1	10	rs407102	rs10127790	T	C	109891133	0.2962	2.57e-09	-5.957	0.890276	SORT1	0	intronic	0.248	6	4	1
1	10	rs407102	rs3879447	T	C	109891403	0.2962	1.983e-09	-5.999	0.890276	SORT1	0	intronic	1.221	6	4	1
1	10	rs407102	rs3879448	C	G	109891423	0.2962	1.722e-09	-6.022	0.890276	SORT1	0	intronic	1.137	6	4	1
1	10	rs407102	rs1278664	T	G	109893210	0.2296	1.457e-06	4.817	0.664864	SORT1	0	intronic	6.391	7	4	1
1	10	rs407102	rs4970751	A	C	109896600	0.2863	8.495e-10	6.135	0.9252	SORT1	0	intronic	2.483	6	4	1
1	10	rs407102	rs11142	A	G	109897103	0.2853	7.233e-10	6.161	0.929949	SORT1	0	exonic	12.14	NA	4	1
1	10	rs407102	rs1030522	C	G	109900707	0.2883	6.836e-10	6.17	0.924849	SORT1	0	intronic	16.07	5	4	1
1	10	rs407102	rs1963870	T	C	109901215	0.2863	7.491e-10	6.155	0.934269	SORT1	0	intronic	0.498	NA	4	1
1	10	rs407102	rs1963869	C	G	109901462	0.2873	5.074e-10	-6.217	0.929546	SORT1	0	intronic	0.04	7	4	1
1	10	rs407102	rs3879449	A	T	109904971	0.2873	8.339e-10	6.138	0.929546	SORT1	0	intronic	1.582	6	4	1
1	10	rs407102	rs3879450	T	C	109909149	0.2873	5.396e-10	-6.207	0.929546	SORT1	0	intronic	5.003	5	4	1
1	10	rs407102	rs3879451	T	C	109909269	0.2873	5.88e-10	-6.194	0.929546	SORT1	0	intronic	0.099	5	4	1
1	10	rs407102	rs10858085	A	G	109914983	0.2853	5.557e-10	6.202	0.929949	SORT1	0	intronic	5.253	5	2	1
1	10	rs407102	rs10858086	A	C	109915075	0.2853	5.694e-10	-6.199	0.929949	SORT1	0	intronic	4.261	5	2	1
1	10	rs407102	rs10858087	A	T	109916890	0.2942	1.358e-09	-6.06	0.896932	SORT1	0	intronic	12.82	6	5	1
1	10	rs407102	rs11102976	C	G	109917540	0.2853	5.941e-10	-6.192	0.929949	SORT1	0	intronic	0.776	7	5	1
1	10	rs407102	rs12037677	T	C	109918766	0.2853	NA	NA	0.929949	SORT1	0	intronic	1.228	7	1	1
1	10	rs407102	rs10858088	T	C	109923586	0.2863	7.436e-10	-6.157	0.9252	SORT1	0	intronic	3.421	6	4	1
1	10	rs407102	rs10858089	T	C	109926828	0.2863	7.51e-10	6.155	0.9252	SORT1	0	intronic	0.274	4	2	1
1	10	rs407102	rs3879452	A	G	109929237	0.2863	8.63e-10	-6.133	0.9252	SORT1	0	intronic	2.158	2b	5	1
1	10	rs407102	rs10858090	A	G	109930498	0.2853	6.239e-10	6.184	0.929949	SORT1	0	intronic	0.818	7	5	1
1	10	rs407102	rs4970752	T	C	109930852	0.2863	8.746e-10	-6.131	0.9252	SORT1	0	intronic	3.359	5	2	1
1	10	rs407102	rs10745354	T	C	109931908	0.2863	8.176e-10	-6.141	0.9252	SORT1	0	intronic	2.268	5	2	1
1	10	rs407102	rs2115786	C	T	109933422	0.2833	NA	NA	0.851902	SORT1	0	intronic	5.847	2b	1	1
1	10	rs407102	rs3768495	T	C	109935325	0.2863	7.249e-10	-6.161	0.9252	SORT1	0	intronic	1.691	NA	1	1
1	10	rs407102	rs3768494	A	G	109935427	0.2853	4.817e-10	6.225	0.929949	SORT1	0	intronic	5.976	NA	1	1
1	10	rs407102	rs3768493	T	C	109935505	0.2863	7.22e-10	-6.161	0.9252	SORT1	0	intronic	9.557	NA	1	1
1	10	rs407102	rs10858091	T	C	109935578	0.2863	7.217e-10	6.161	0.9252	SORT1	0	intronic	2.029	4	1	1
1	10	rs407102	rs2140924	A	C	109935775	0.2853	4.801e-10	6.225	0.929949	SORT1	0	UTR5	4.646	2b	1	1
1	10	rs407102	rs6537757	A	G	109936682	0.2853	4.872e-10	-6.223	0.929949	SORT1	0	intronic	5.115	4	1	1
1	10	rs407102	rs1343465	T	C	109937426	0.2863	7.319e-10	6.159	0.9252	SORT1	0	intronic	4.533	NA	1	1
1	10	rs407102	rs12711447	T	C	109937916	0.2853	4.707e-10	-6.229	0.929949	SORT1	0	intronic	5.703	5	1	1
1	10	rs407102	rs12711448	T	C	109937931	0.2863	6.371e-10	-6.181	0.9252	SORT1	0	intronic	7.984	3a	1	1
1	10	rs407102	rs72646553	C	G	109940503	0.2296	2.485e-06	4.709	0.664864	SORT1	0	exonic	8.272	4	1	1
1	10	rs407102	rs1880670	T	C	109941133	0.2863	7.16e-10	-6.163	0.9252	PSMA5:SORT1	0	downstream:upstream	11.43	4	1	1
1	10	rs407102	rs10858092	T	C	109943893	0.2863	7.171e-10	-6.162	0.9252	PSMA5	0	UTR3	3.912	6	4	1
1	10	rs407102	rs7518013	T	C	109944078	0.2853	4.577e-10	6.233	0.929949	PSMA5	0	UTR3	0.84	7	4	1
1	10	rs407102	rs4970846	A	C	109946095	0.2873	2.21e-10	6.346	0.920478	PSMA5	0	intronic	0.63	6	4	1
1	10	rs407102	rs2152925	T	C	109946882	0.2853	4.511e-10	6.235	0.929949	PSMA5	0	intronic	0.129	NA	4	1
1	10	rs407102	rs4120621	A	G	109949008	0.2853	4.542e-10	6.234	0.929949	PSMA5	0	intronic	1.412	NA	4	1
1	10	rs407102	rs10858094	T	C	109950858	0.2863	6.646e-10	6.174	0.9252	PSMA5	0	intronic	1.159	6	4	1
1	10	rs407102	rs10745355	T	C	109951711	0.2853	4.834e-10	6.224	0.929949	PSMA5	0	intronic	0.539	7	4	1
1	10	rs407102	rs10776806	A	G	109952127	0.2853	3.412e-10	-6.279	0.929949	PSMA5	0	intronic	6.52	5	4	1
1	10	rs407102	rs2303875	A	C	109955010	0.2853	4.84e-10	-6.224	0.929949	PSMA5	0	intronic	0.803	NA	4	1
1	10	rs407102	rs10776807	A	G	109956156	0.2863	2.19e-10	-6.347	0.9252	PSMA5	0	intronic	3.526	7	4	1
1	10	rs407102	rs1465607	T	C	109958035	0.2853	4.209e-10	6.246	0.929949	PSMA5	0	intronic	9.688	NA	4	1
1	10	rs407102	rs10745356	A	C	109960270	0.2853	4.175e-10	-6.247	0.929949	PSMA5	0	intronic	4.289	6	4	1
1	10	rs407102	rs7555732	A	G	109961935	0.2296	1.09e-06	4.875	0.664864	PSMA5	0	intronic	2.376	7	4	1
1	10	rs407102	rs7551176	T	C	109961965	0.2853	4.482e-10	-6.236	0.929949	PSMA5	0	intronic	3.467	6	4	1
1	10	rs407102	rs10858095	C	G	109962642	0.2863	5.687e-10	-6.199	0.9252	PSMA5	0	intronic	9.296	7	4	1
1	10	rs407102	rs12024582	A	G	109965256	0.2853	3.933e-10	-6.257	0.929949	PSMA5	0	intronic	2.268	7	4	1
1	10	rs407102	rs3768491	A	G	109965986	0.2863	6.81e-10	6.17	0.9252	PSMA5	0	intronic	2.5	NA	1	1
1	10	rs407102	rs3931560	A	C	109966718	0.2863	6.026e-10	6.19	0.9252	PSMA5	0	intronic	3.472	NA	1	1
1	10	rs10858096	rs10858096	A	C	109967104	0.4602	4.963e-08	-5.453	1	PSMA5	0	intronic	10.94	5	2	1
1	10	rs407102	rs11102981	G	C	109967323	0.2863	NA	NA	0.9252	PSMA5	0	intronic	0.365	4	1	1
1	10	rs407102	rs10858097	C	A	109967324	0.2853	NA	NA	0.929949	PSMA5	0	intronic	2.152	4	1	1
1	10	rs10858096	rs3820667	A	C	109968410	0.4622	6.045e-08	5.417	0.992769	PSMA5	0	intronic	3.139	NA	1	1
1	10	rs407102	rs4970754	A	G	109969721	0.2873	9.529e-10	6.117	0.920478	PSMA5	0	upstream	7.202	3a	1	1
1	10	rs407102	rs1149168	A	G	109973387	0.2296	1.24e-06	4.849	0.664864	PSMA5	4325	intergenic	4.312	7	5	1
1	10	rs407102	rs12073497	A	C	109974450	0.2863	6.807e-10	6.171	0.9252	PSMA5	5388	intergenic	2.554	7	5	1
1	10	rs407102	rs4970756	C	G	109976775	0.2922	1.194e-09	6.081	0.897538	PSMA5	7713	intergenic	3.998	7	5	1
1	10	rs407102	rs1291916	T	C	109978034	0.2922	1.714e-09	-6.023	0.897538	PSMA5	8972	intergenic	0.138	5	5	1
1	10	rs407102	rs4970729	A	G	109979202	0.2922	1.248e-09	-6.074	0.897538	PSMA5	10140	intergenic	9.716	6	5	1
1	10	rs407102	rs4970730	T	C	109979526	0.2913	1.354e-09	6.061	0.902113	PSMA5	10464	intergenic	2.249	6	5	1
1	10	rs407102	rs4970758	A	G	109979617	0.2913	1.304e-09	6.067	0.902113	PSMA5	10555	intergenic	1.31	6	5	1
1	10	rs407102	rs4970759	A	C	109982213	0.2903	1.007e-09	-6.108	0.897936	PSMA5	13151	intergenic	20.3	7	2	1
1	10	rs407102	rs4970760	A	G	109985439	0.2903	1.168e-09	6.085	0.897936	PSMA5	16377	intergenic	6.211	7	5	1
1	10	rs407102	rs6664236	A	C	109986672	0.2913	1.54e-09	-6.04	0.893355	PSMA5	17610	intergenic	13.28	6	7	1
1	10	rs407102	rs2043059	A	C	109991009	0.3111	4.606e-09	-5.861	0.786764	SYPL2	18171	intergenic	5.539	6	13	1
1	10	rs407102	rs2039694	A	G	109991700	0.3111	4.589e-09	5.861	0.786764	SYPL2	17480	intergenic	20.5	7	13	1
1	10	rs407102	rs4970761	T	C	109995398	0.3091	5.132e-09	-5.843	0.777742	SYPL2	13782	intergenic	1.633	5	2	1
1	10	rs407102	rs4970731	T	C	109995459	0.3101	3.728e-09	5.896	0.790751	SYPL2	13721	intergenic	2.64	7	2	1
1	10	rs407102	rs9787176	A	C	109996689	0.3111	5.661e-09	-5.826	0.786764	SYPL2	12491	intergenic	2.077	6	9	1
1	10	rs407102	rs9787177	A	C	109996734	0.3111	4.633e-09	-5.86	0.786764	SYPL2	12446	intergenic	10.73	6	9	1
1	10	rs407102	rs11102984	T	C	109997373	0.3111	4.571e-09	5.862	0.786764	SYPL2	11807	intergenic	5.791	3a	9	1
1	10	rs407102	rs12140694	T	C	109998386	0.3111	4.554e-09	-5.863	0.786764	SYPL2	10794	intergenic	0.642	7	9	1
1	10	rs407102	rs1933182	A	C	109999838	0.3111	4.619e-09	5.86	0.786764	SYPL2	9342	intergenic	1.921	NA	9	1
1	10	rs407102	rs10745357	C	G	110001876	0.3111	4.927e-09	-5.85	0.786764	SYPL2	7304	intergenic	1.886	7	13	1
1	10	rs407102	rs891380	T	G	110003286	0.3101	3.98e-09	5.885	0.790751	SYPL2	5894	intergenic	1.437	NA	9	1
1	10	rs407102	rs6693932	T	C	110003575	0.3091	3.795e-09	5.893	0.786695	SYPL2	5605	intergenic	0.02	6	9	1
1	10	rs407102	rs891379	A	G	110003605	0.3091	3.766e-09	5.894	0.786695	SYPL2	5575	intergenic	0.023	NA	9	1
1	10	rs407102	rs2115787	T	G	110003840	0.3101	3.899e-09	5.888	0.790751	SYPL2	5340	intergenic	2.632	NA	9	1
1	10	rs10858096	rs4970762	C	G	110004543	0.4851	1.665e-07	-5.233	0.881308	SYPL2	4637	intergenic	1.298	7	13	1
1	10	rs407102	rs2140923	T	C	110004990	0.3111	4.631e-09	-5.86	0.786764	SYPL2	4190	intergenic	3.68	NA	13	1
1	10	rs407102	rs4970763	A	G	110006349	0.3101	2.516e-09	-5.96	0.790751	SYPL2	2831	intergenic	0.233	7	13	1
1	10	rs407102	rs4246517	C	G	110007636	0.3111	4.245e-09	-5.874	0.786764	SYPL2	1544	intergenic	0.364	2b	7	1
1	10	rs407102	rs2884752	A	G	110008651	0.3101	2.956e-09	-5.934	0.790751	SYPL2	0	upstream	3.853	5	1	1
1	10	rs407102	rs2359652	A	T	110008720	0.3101	5.389e-09	-5.835	0.790751	SYPL2	0	upstream	5.746	3a	1	1
1	10	rs407102	rs11101960	T	C	110008778	0.3111	3.753e-09	-5.895	0.786764	SYPL2	0	upstream	7.184	4	1	1
1	10	rs407102	rs11101961	T	C	110008813	0.3101	2.965e-09	5.933	0.790751	SYPL2	0	upstream	8.556	2b	1	1
1	10	rs10858096	rs4970764	C	G	110009106	0.4632	3.402e-06	4.645	0.721679	SYPL2	0	upstream	9.729	4	1	1
1	10	rs407102	rs4970765	T	C	110009171	0.3101	3.097e-09	-5.926	0.790751	SYPL2	0	upstream	14.19	2a	1	1
1	10	rs407102	rs2787015	A	C	110009434	0.3101	1.844e-09	6.011	0.790751	SYPL2	0	UTR5	10.34	NA	1	1
1	10	rs407102	rs10857786	C	G	110010110	0.3101	2.916e-09	5.936	0.790751	SYPL2	0	intronic	9.212	5	1	1
1	10	rs407102	rs10857787	T	C	110010289	0.3101	2.477e-09	-5.963	0.790751	SYPL2	0	intronic	8.215	1b	1	1
1	10	rs407102	rs1525916	A	G	110010949	0.3101	2.176e-09	5.984	0.790751	SYPL2	0	intronic	6.812	5	1	1
1	10	rs407102	rs2152924	A	G	110011701	0.3101	3.117e-09	-5.925	0.790751	SYPL2	0	intronic	1.546	2b	1	1
1	10	rs407102	rs1368988	A	T	110012123	0.3101	2.089e-08	5.604	0.790751	SYPL2	0	intronic	2.073	6	5	1
1	10	rs407102	rs10745305	A	G	110012148	0.3101	2.312e-09	5.974	0.790751	SYPL2	0	intronic	0.134	6	5	1
1	10	rs407102	rs10857788	A	G	110012289	0.3091	2.75e-09	-5.946	0.785795	SYPL2	0	intronic	1.92	7	5	1
1	10	rs407102	rs10857789	T	C	110012293	0.3091	3.145e-09	-5.924	0.785795	SYPL2	0	intronic	1.634	7	5	1
1	10	rs407102	rs12137189	A	G	110013215	0.3111	3.362e-09	5.913	0.786764	SYPL2	0	intronic	4.988	5	2	1
1	10	rs407102	rs10776698	T	C	110013630	0.3111	4.397e-09	-5.869	0.786764	SYPL2	0	intronic	12.9	5	2	1
1	10	rs407102	rs4970766	T	C	110013955	0.3101	3.444e-09	-5.909	0.790751	SYPL2	0	intronic	1.486	7	5	1
1	10	rs407102	rs12136063	A	G	110014170	0.3111	4.461e-09	-5.866	0.786764	SYPL2	0	intronic	5.452	6	5	1
1	10	rs407102	rs11101962	A	T	110014187	0.3101	3.078e-09	5.927	0.790751	SYPL2	0	intronic	3.359	7	5	1
1	10	rs407102	rs518697	A	G	110014778	0.3101	2.633e-09	-5.953	0.790751	SYPL2	0	intronic	5.068	NA	5	1
1	10	rs407102	rs529091	A	C	110014975	0.3101	2.57e-09	-5.957	0.790751	SYPL2	0	intronic	5.517	NA	5	1
1	10	rs407102	rs4970767	A	G	110015183	0.3101	2.562e-09	-5.957	0.790751	SYPL2	0	intronic	0.901	6	5	1
1	10	rs407102	rs12753439	A	G	110015519	0.3111	3.575e-09	-5.903	0.786764	SYPL2	0	intronic	11.82	7	5	1
1	10	rs407102	rs10494040	T	C	110015732	0.3101	2.521e-09	-5.96	0.790751	SYPL2	0	intronic	2.723	5	2	1
1	10	rs407102	rs2359653	A	G	110016378	0.3101	1.61e-09	6.033	0.790751	SYPL2	0	intronic	0.217	6	5	1
1	10	rs407102	rs9429519	A	G	110017105	0.3111	3.362e-09	-5.913	0.786764	SYPL2	0	intronic	0.332	6	5	1
1	10	rs407102	rs491285	T	C	110019002	0.3111	2.732e-09	5.947	0.786764	SYPL2	0	intronic	4.71	NA	4	1
1	10	rs407102	rs9661614	T	C	110021837	0.3101	1.892e-09	-6.007	0.790751	SYPL2	0	intronic	1.253	4	4	1
1	10	rs407102	rs12145677	A	G	110023610	0.3101	2.097e-09	5.99	0.790751	SYPL2	0	UTR3	6.117	5	4	1
1	10	rs2091329	rs2781552	A	G	110025881	0.3161	6.79e-10	-6.171	0.783893	ATXN7L2	0	upstream	7.304	2b	1	1
1	10	rs2091329	rs573491	T	G	110026891	0.3161	6.454e-10	-6.179	0.783893	ATXN7L2	0	intronic	2.553	NA	1	1
1	10	rs2091329	rs2781553	T	G	110026989	0.3141	6.142e-10	6.187	0.774057	ATXN7L2	0	intronic	0.035	4	1	1
1	10	rs2091329	rs1144594	T	C	110029475	0.3121	7.651e-10	6.152	0.779317	ATXN7L2	0	intronic	9.716	NA	4	1
1	10	rs2091329	rs1144593	A	G	110030945	0.3121	5.855e-10	-6.194	0.779317	ATXN7L2	0	intronic	3.194	4	4	1
1	10	rs2091329	rs1278847	A	C	110037483	0.3121	1.503e-09	6.044	0.80296	CYB561D1	0	intronic	3.421	NA	1	1
1	10	rs2091329	rs749056	T	G	110037838	0.3121	1.098e-09	-6.094	0.80296	CYB561D1	0	intronic	3.716	5	1	1
1	10	rs2091329	rs6666119	A	G	110040310	0.3101	2.883e-09	-5.938	0.801432	CYB561D1	0	UTR3	3.853	5	3	1
1	10	rs10858096	rs2297797	T	C	110040680	0.4672	1.223e-05	-4.373	0.6106	CYB561D1	0	UTR3	1.769	5	2	1
1	10	rs2091329	rs2091329	A	G	110042079	0.2883	2.181e-08	-5.597	1	CYB561D1	0	UTR3	0.668	NA	4	1
1	10	rs2091329	rs579652	A	G	110044375	0.2922	1.388e-07	-5.267	0.935787	CYB561D1	0	intronic	15.49	5	2	1
1	10	rs2091329	rs580522	A	G	110044458	0.2903	1.644e-07	-5.236	0.926279	CYB561D1	0	intronic	3.795	NA	2	1
1	10	rs2091329	rs527277	A	G	110046093	0.2793	4.046e-08	5.489	0.948678	AMIGO1:CYB561D1	0	downstream:downstream	1.477	NA	1	1
1	10	rs2091329	rs575113	A	G	110046373	0.2873	3.498e-08	5.514	0.929337	AMIGO1:CYB561D1	0	downstream:downstream	3.681	NA	1	1
1	10	rs2091329	rs14184	C	G	110047110	0.2883	1.192e-07	-5.295	0.916841	AMIGO1	0	UTR3	20.1	5	1	1
1	10	rs2091329	rs3738772	A	C	110048436	0.2803	2.376e-08	5.582	0.953217	AMIGO1	0	UTR3	8.349	5	3	1
1	10	rs2091329	rs3738773	A	G	110048527	0.2803	2.441e-08	5.577	0.953217	AMIGO1	0	UTR3	1.161	3a	3	1
1	11	rs112780312	rs10752613	A	T	153760104	0.2744	6.831e-07	-4.966	0.736327	ENSG00000207039	1807	intergenic	5.929	6	5	1
1	11	rs112780312	rs11583896	A	G	153768982	0.2883	2.354e-07	-5.169	0.825038	RP11-216N14.5	0	ncRNA_exonic	5.359	1f	3	1
1	11	rs112780312	rs4077168	A	T	153775017	0.2913	1.867e-07	5.212	0.841138	RP11-216N14.5	0	downstream	2.641	1f	3	1
1	11	rs112780312	rs113422987	T	C	153787279	0.2893	2.177e-07	-5.184	0.849459	GATAD2B	0	intronic	1.978	7	4	1
1	11	rs112780312	rs72694220	T	C	153788211	0.2893	2.63e-07	5.148	0.849459	GATAD2B	0	intronic	0.203	4	4	1
1	11	rs112780312	rs4363451	T	C	153790501	0.2893	2.661e-07	-5.146	0.849459	GATAD2B	0	intronic	13.37	7	4	1
1	11	rs112780312	rs10796956	T	C	153795569	0.2913	5.372e-08	5.439	0.869502	GATAD2B	0	intronic	1.062	6	4	1
1	11	rs112780312	rs112780312	A	G	153797015	0.2773	9.721e-09	-5.736	1	GATAD2B	0	intronic	1.748	7	4	1
1	11	rs112780312	rs4391701	T	C	153798128	0.2883	2.344e-07	-5.17	0.853193	GATAD2B	0	intronic	6.805	6	2	1
1	11	rs112780312	rs7512766	T	C	153810564	0.2883	1.831e-07	-5.216	0.853193	GATAD2B	0	intronic	8.553	1f	4	1
1	11	rs112780312	rs72694231	T	C	153816752	0.2883	1.784e-07	5.221	0.853193	GATAD2B	0	intronic	9.843	5	4	1
1	11	rs112780312	rs4612664	T	C	153822673	0.2913	4.01e-08	5.49	0.869502	GATAD2B	0	intronic	4.014	6	4	1
1	11	rs112780312	rs72694234	T	G	153823918	0.2913	3.938e-08	5.494	0.869502	GATAD2B	0	intronic	3.161	3a	4	1
1	11	rs112780312	rs4845576	T	C	153825404	0.2883	1.756e-07	-5.223	0.853193	ENSG00000223599	0	ncRNA_exonic	5.729	5	4	1
1	11	rs112780312	rs12038577	T	C	153826169	0.2913	4.227e-08	5.481	0.869502	GATAD2B	0	intronic	11.82	6	3	1
1	11	rs112780312	rs9660089	T	C	153827619	0.2922	4.518e-08	5.469	0.864757	GATAD2B	0	intronic	2.129	1f	4	1
1	11	rs112780312	rs4595397	T	C	153828080	0.2903	1.839e-07	5.215	0.843669	GATAD2B	0	intronic	0.801	5	4	1
1	11	rs112780312	rs4520447	T	C	153829389	0.2883	1.607e-07	5.24	0.853193	GATAD2B	0	intronic	12.66	1f	4	1
1	11	rs112780312	rs4845577	A	T	153829633	0.2883	NA	NA	0.842334	GATAD2B	0	intronic	0.024	6	4	0
1	11	rs112780312	rs4845578	A	G	153829993	0.2883	2.02e-07	-5.197	0.853193	GATAD2B	0	intronic	4.507	6	4	1
1	11	rs112780312	rs4508047	T	C	153831157	0.2893	2.025e-07	5.197	0.848417	GATAD2B	0	intronic	0.547	7	4	1
1	11	rs112780312	rs6700451	T	C	153831246	0.2883	2.262e-07	5.176	0.853193	GATAD2B	0	intronic	0.851	6	4	1
1	11	rs112780312	rs11585416	A	T	153833104	0.2893	2.576e-07	5.152	0.848417	GATAD2B	0	intronic	1.661	6	4	1
1	11	rs112780312	rs11583152	A	G	153833153	0.2893	2.279e-07	-5.175	0.848417	GATAD2B	0	intronic	0.99	7	4	1
1	11	rs112780312	rs7552274	T	C	153833591	0.2893	2.419e-07	-5.164	0.848417	GATAD2B	0	intronic	1.412	5	4	1
1	11	rs112780312	rs6694061	C	G	153834868	0.2883	2.295e-07	-5.174	0.853193	GATAD2B	0	intronic	0.531	7	5	1
1	11	rs112780312	rs59308681	A	G	153836163	0.2883	3.74e-07	-5.082	0.853193	GATAD2B	0	intronic	0.058	7	4	1
1	11	rs112780312	rs11587151	T	C	153837181	0.2883	2.321e-07	-5.172	0.853193	GATAD2B	0	intronic	0.635	6	4	1
1	11	rs112780312	rs34805562	T	C	153839045	0.2883	2.277e-07	-5.175	0.853193	GATAD2B	0	intronic	0.857	4	2	1
1	11	rs112780312	rs12567313	T	C	153840505	0.2883	2.367e-07	5.168	0.853193	GATAD2B	0	intronic	2.18	7	5	1
1	11	rs112780312	rs112874207	T	C	153841721	0.2883	2.277e-07	5.175	0.853193	GATAD2B	0	intronic	1.312	7	4	1
1	11	rs112780312	rs12042989	A	G	153842288	0.2893	2.084e-07	5.192	0.848417	GATAD2B	0	intronic	0.188	1d	4	1
1	11	rs112780312	rs201743577	T	C	153842445	0.2883	NA	NA	0.842334	GATAD2B	0	intronic	0.346	5	4	0
1	11	rs112780312	rs12041850	C	G	153843036	0.2893	1.989e-07	5.2	0.848417	GATAD2B	0	intronic	0.986	6	5	1
1	11	rs112780312	rs59678326	T	C	153843243	0.2893	2.15e-07	5.186	0.848417	GATAD2B	0	intronic	0.102	6	4	1
1	11	rs112780312	rs11590099	T	C	153848208	0.2883	2.253e-07	-5.177	0.853193	GATAD2B	0	intronic	7.97	5	4	1
1	11	rs112780312	rs12041920	T	C	153851106	0.2883	2.062e-07	5.194	0.853193	GATAD2B	0	intronic	1.628	6	5	1
1	11	rs112780312	rs60150125	A	G	153854070	0.2883	2.338e-07	-5.17	0.843366	GATAD2B	0	intronic	0.019	5	1	1
1	11	rs112780312	rs12043350	T	C	153854380	0.2883	2.999e-07	-5.124	0.853193	GATAD2B	0	intronic	5.144	2b	1	1
1	11	rs112780312	rs12042562	C	G	153856364	0.2883	3.142e-07	-5.115	0.853193	GATAD2B	0	intronic	10.84	7	4	1
1	11	rs112780312	rs12409811	T	C	153856873	0.2883	4.209e-07	-5.059	0.853193	GATAD2B	0	intronic	1.545	6	4	1
1	11	rs112780312	rs7537691	T	C	153858720	0.2893	3.107e-07	-5.117	0.848417	GATAD2B	0	intronic	2.571	6	4	1
1	11	rs112780312	rs11586830	A	G	153860305	0.2883	2.547e-07	-5.154	0.853193	GATAD2B	0	intronic	0.274	5	4	1
1	11	rs112780312	rs11589043	A	T	153860453	0.2893	2.275e-07	5.175	0.848417	GATAD2B	0	intronic	0.121	6	4	1
1	11	rs112780312	rs113489222	T	G	153863426	0.2714	1.995e-06	-4.754	0.76802	GATAD2B	0	intronic	0.157	6	4	1
1	11	rs112780312	rs11264532	A	G	153865536	0.2893	3.206e-07	-5.111	0.848417	GATAD2B	0	intronic	3.173	1f	4	1
1	11	rs112780312	rs6427329	A	G	153867805	0.2893	3.405e-07	5.1	0.848417	GATAD2B	0	intronic	0.368	5	4	1
1	11	rs112780312	rs6659220	A	T	153868650	0.2893	5.767e-07	-4.999	0.848417	GATAD2B	0	intronic	0.098	3a	4	1
1	11	rs112780312	rs11591134	A	G	153868966	0.2883	4.272e-07	-5.056	0.853193	GATAD2B	0	intronic	1.794	7	4	1
1	11	rs112780312	rs12401565	A	G	153869946	0.2893	3.765e-07	-5.08	0.848417	GATAD2B	0	intronic	1.805	6	4	1
1	11	rs112780312	rs12022158	A	G	153870649	0.2893	3.855e-07	5.076	0.848417	GATAD2B	0	intronic	2.623	6	4	1
1	11	rs112780312	rs11589857	A	G	153871592	0.2883	4.502e-07	-5.046	0.853193	GATAD2B	0	intronic	0.124	6	4	1
1	11	rs112780312	rs12022730	A	C	153872615	0.2883	4.428e-07	-5.05	0.853193	GATAD2B	0	intronic	2.168	7	4	1
1	11	rs112780312	rs11264559	T	C	153874688	0.2883	4.568e-07	-5.044	0.853193	GATAD2B	0	intronic	0.58	7	4	1
1	11	rs112780312	rs11264567	A	G	153875689	0.2893	6.164e-07	4.986	0.848417	GATAD2B	0	intronic	4.999	6	4	1
1	11	rs112780312	rs11577942	A	G	153877724	0.2883	5.186e-07	-5.019	0.853193	GATAD2B	0	intronic	2.658	5	4	1
1	11	rs112780312	rs6671132	T	C	153879744	0.2883	6.246e-07	-4.983	0.853193	GATAD2B	0	intronic	0.264	6	4	1
1	11	rs112780312	rs12028398	T	C	153883283	0.2883	5.757e-07	-4.999	0.853193	GATAD2B	0	intronic	2.241	6	4	1
1	11	rs112780312	rs4845583	T	C	153883881	0.2893	6.08e-07	-4.989	0.848417	GATAD2B	0	intronic	12.93	6	5	1
1	11	rs112780312	rs12032914	A	G	153886762	0.2883	6.986e-07	4.962	0.853193	GATAD2B	0	intronic	1.643	5	4	1
1	11	rs112780312	rs12033835	T	C	153886873	0.2893	7.223e-07	4.955	0.848417	GATAD2B	0	intronic	0.495	1f	4	1
1	11	rs112780312	rs11581644	A	G	153890988	0.2873	7.502e-07	4.948	0.848145	GATAD2B	0	intronic	18.91	1f	3	1
1	11	rs112780312	rs4845357	A	G	153896212	0.2913	7.96e-07	4.936	0.821855	GATAD2B	0	upstream	8.971	2b	1	1
1	11	rs112780312	rs4845585	T	C	153896370	0.2922	7.533e-07	4.947	0.817242	GATAD2B	0	upstream	2.195	4	1	1
1	11	rs112780312	rs4845358	T	C	153896425	0.2913	7.391e-07	-4.951	0.821855	GATAD2B	0	upstream	8.083	4	1	1
1	11	rs112780312	rs10796968	A	C	153899330	0.2913	8.018e-07	4.935	0.821855	DENND4B	2647	intergenic	0.572	7	5	1
1	11	rs112780312	rs12406003	A	C	153900490	0.2913	7.944e-07	-4.937	0.821855	DENND4B	1487	intergenic	1.46	6	5	1
1	11	rs112780312	rs3748849	A	G	153901149	0.2913	6.662e-07	4.971	0.821855	DENND4B	0	downstream	2.894	NA	2	1
1	11	rs112780312	rs3748848	A	G	153901302	0.2913	7.123e-07	4.958	0.821855	DENND4B	0	downstream	7.338	NA	4	1
1	11	rs112780312	rs1572788	T	C	153903883	0.2913	6.222e-07	4.984	0.821855	DENND4B	0	intronic	4.444	1f	4	1
1	11	rs112780312	rs11586593	T	C	153904214	0.2922	5.185e-07	5.019	0.817242	DENND4B	0	intronic	0.171	6	4	1
1	11	rs112780312	rs11264619	A	G	153904338	0.2913	6.387e-07	-4.979	0.821855	DENND4B	0	intronic	6.104	7	4	1
1	11	rs112780312	rs11264620	T	C	153904574	0.2922	5.619e-07	5.004	0.817242	DENND4B	0	intronic	0.422	7	4	1
1	11	rs112780312	rs58095661	T	C	153907839	0.2913	6.314e-07	4.981	0.821855	DENND4B	0	intronic	0.617	6	4	1
1	11	rs112780312	rs61219911	T	C	153907908	0.2922	6.318e-07	4.981	0.817242	DENND4B	0	intronic	0.014	7	4	1
1	11	rs112780312	rs11586075	A	G	153908309	0.2922	5.673e-07	-5.002	0.817242	DENND4B	0	intronic	4.298	5	4	1
1	11	rs112780312	rs1043608	C	G	153909069	0.2913	7.137e-07	-4.958	0.821855	DENND4B	0	exonic	7.512	2b	4	1
1	11	rs112780312	rs1110165	T	G	153913699	0.2922	5.672e-07	5.002	0.817242	DENND4B	0	intronic	2.838	1f	3	1
1	11	rs112780312	rs6680140	T	C	153917369	0.2913	4.768e-07	-5.035	0.821855	DENND4B	0	intronic	6.61	1b	1	1
1	11	rs112780312	rs946682	T	G	153919756	0.2913	3.833e-07	5.077	0.821855	CRTC2:DENND4B	0	downstream:upstream	7.302	1d	2	1
1	11	rs112780312	rs8450	A	G	153920286	0.2913	4.904e-07	-5.03	0.821855	CRTC2	0	UTR3	13.18	NA	3	1
1	11	rs112780312	rs10559	A	G	153920564	0.2903	4.755e-07	5.036	0.816914	CRTC2	0	UTR3	12.61	4	3	1
1	11	rs112780312	rs10127983	T	C	153923276	0.2873	5.054e-07	-5.024	0.792875	CRTC2	0	intronic	5.607	6	4	1
1	11	rs112780312	rs11264680	T	C	153926078	0.2913	2.625e-07	5.149	0.821855	CRTC2	0	exonic	7.983	1f	2	1
1	11	rs112780312	rs10908557	C	G	153927052	0.2922	2.728e-07	5.141	0.808994	CRTC2	0	intronic	1.884	6	2	1
1	11	rs112780312	rs10908558	T	C	153927270	0.2903	2.814e-07	5.135	0.816914	CRTC2	0	intronic	7.44	1f	2	1
1	11	rs112780312	rs6724	C	G	153932212	0.2843	1.4e-06	-4.825	0.775893	SLC39A1	0	UTR3	0.017	3a	3	1
1	11	rs112780312	rs3791187	T	C	153934203	0.2903	3.366e-07	5.102	0.816914	SLC39A1	0	intronic	11.07	NA	1	1
1	11	rs112780312	rs11264734	T	C	153937746	0.2843	1.552e-06	4.804	0.775893	SLC39A1	0	intronic	2.684	6	1	1
1	11	rs112780312	rs12027783	T	C	153937864	0.2843	1.663e-06	-4.791	0.775893	SLC39A1	0	intronic	3.01	6	1	1
1	11	rs112780312	rs11264743	T	C	153941514	0.2853	3.12e-06	-4.663	0.771252	CREB3L4	0	exonic	24.4	4	1	1
1	11	rs112780312	rs12023699	A	G	153942156	0.2853	3.007e-06	-4.67	0.771252	CREB3L4	0	intronic	2.59	7	1	1
1	11	rs112780312	rs12403956	A	G	153943079	0.2863	3.031e-06	4.669	0.766637	CREB3L4	0	intronic	2.549	6	2	1
1	11	rs112780312	rs6666703	T	C	153943800	0.2853	3.683e-06	-4.629	0.771252	CREB3L4	0	intronic	0.77	6	5	1
1	11	rs112780312	rs11264763	T	C	153948705	0.2873	4.751e-06	-4.575	0.734374	JTB	0	intronic	0.913	5	1	1
1	11	rs112780312	rs1547766	C	A	153952205	0.2932	NA	NA	0.720057	ENSG00000272654	0	downstream	0.704	6	4	1
1	11	rs112780312	rs1547767	C	T	153952220	0.2932	NA	NA	0.720057	ENSG00000272654	0	downstream	0.49	6	4	1
1	11	rs112780312	rs7524739	T	G	153952598	0.2942	1.353e-06	4.832	0.715724	ENSG00000272654	0	downstream	6.889	7	4	1
1	11	rs112780312	rs138767862	A	G	153953037	0.2932	NA	NA	0.720057	RAB13	1090	intergenic	6.008	7	4	1
1	11	rs112780312	rs12564669	C	G	153966081	0.2972	1.072e-06	-4.878	0.702867	NUP210L	0	intronic	0.383	4	3	1
1	11	rs112780312	rs6701341	T	C	153974621	0.2972	1.355e-06	-4.831	0.702867	NUP210L	0	intronic	4.589	1f	5	1
1	11	rs112780312	rs6703545	T	C	153980341	0.2972	1.959e-06	-4.758	0.702867	NUP210L	0	intronic	1.506	6	5	1
1	11	rs112780312	rs61542760	A	G	153981639	0.2972	2.036e-06	-4.75	0.702867	NUP210L	0	intronic	0.642	6	5	1
1	11	rs112780312	rs12408260	T	C	153982925	0.2972	1.741e-06	-4.781	0.702867	NUP210L	0	intronic	1.027	6	5	1
1	11	rs112780312	rs6672856	T	C	153986119	0.2962	2.213e-06	-4.733	0.696546	NUP210L	0	intronic	2.17	6	5	1
1	11	rs112780312	rs11264865	C	G	153986637	0.2962	2.175e-06	4.736	0.696546	NUP210L	0	intronic	6.236	6	5	1
1	11	rs112780312	rs11264866	A	G	153987050	0.2962	2.038e-06	-4.75	0.696546	NUP210L	0	intronic	3.127	2b	5	1
1	11	rs112780312	rs10796986	A	G	153987412	0.2962	2.456e-06	-4.712	0.696546	NUP210L	0	intronic	0.517	7	5	1
1	11	rs112780312	rs6679907	A	C	153988152	0.2962	2.424e-06	-4.714	0.696546	NUP210L	0	intronic	1.03	7	5	1
1	11	rs112780312	rs113165037	A	G	153989736	0.2962	1.976e-06	4.756	0.696546	NUP210L	0	intronic	1.075	5	5	1
1	11	rs112780312	rs11264871	A	C	153990890	0.2922	3.198e-06	4.658	0.641854	NUP210L	0	intronic	1.493	7	5	1
1	11	rs112780312	rs11264873	T	C	153990946	0.2952	3.728e-06	-4.626	0.667446	NUP210L	0	intronic	8.855	7	5	1
1	11	rs112780312	rs12048137	T	G	153992734	0.2793	3.002e-05	4.173	0.610262	NUP210L	0	intronic	4.761	1f	5	1
1	11	rs112780312	rs12049128	A	G	153994210	0.2793	2.427e-05	4.221	0.610262	NUP210L	0	intronic	4.615	5	5	1
1	11	rs112780312	rs11264875	T	C	153994647	0.2793	2.024e-05	-4.262	0.610262	NUP210L	0	exonic	28.6	6	5	1
1	11	rs112780312	rs11264886	A	G	153997346	0.2793	2.38e-05	-4.226	0.610262	NUP210L	0	intronic	2.865	4	5	1
1	11	rs112780312	rs7552737	A	G	153997804	0.2813	2.137e-05	4.25	0.603822	NUP210L	0	intronic	12.41	7	5	1
1	11	rs112780312	rs113792102	A	G	153999035	0.2813	3.464e-05	4.141	0.603822	NUP210L	0	intronic	1.613	7	14	1
1	11	rs112780312	rs11264895	A	G	153999301	0.2813	3.145e-05	4.163	0.603822	NUP210L	0	intronic	2.982	6	14	1
1	11	rs112780312	rs12049557	T	C	154001689	0.2813	2.751e-05	-4.193	0.603822	NUP210L	0	intronic	3.883	6	14	1
1	11	rs112780312	rs56287424	A	G	154008445	0.2813	3.349e-05	-4.148	0.603822	NUP210L	0	intronic	0.758	6	9	1
1	11	rs112780312	rs7521303	T	C	154011605	0.2813	2.304e-05	4.233	0.603822	NUP210L	0	intronic	1.313	6	14	1
1	11	rs112780312	rs10908627	T	C	154012001	0.2813	2.322e-05	-4.231	0.603822	NUP210L	0	intronic	0.217	6	14	1
1	11	rs112780312	rs7526558	T	C	154015428	0.2813	2.656e-05	-4.201	0.603822	NUP210L	0	intronic	2.598	7	14	1
1	11	rs112780312	rs6670019	T	G	154017992	0.2813	2.089e-05	-4.255	0.603822	NUP210L	0	intronic	1.233	5	9	1
1	11	rs112780312	rs7531051	A	G	154020017	0.2813	2.287e-05	-4.235	0.603822	NUP210L	0	intronic	0.176	6	9	1
1	11	rs112780312	rs58289586	T	C	154025666	0.2813	2.402e-05	4.224	0.603822	NUP210L	0	intronic	7.583	5	9	1
1	11	rs112780312	rs11264964	C	G	154029450	0.2813	1.663e-05	-4.306	0.603822	NUP210L	0	intronic	6.961	6	13	1
1	11	rs112780312	rs7547663	A	T	154030239	0.2813	1.945e-05	-4.271	0.603822	NUP210L	0	intronic	2.147	7	13	1
1	12	rs7365380	rs7365380	T	C	173625710	0.4861	4.386e-08	5.475	1	ANKRD45	0	intronic	6.339	7	4	1
1	12	rs7365380	rs6660825	A	G	173724418	0.4841	4.387e-08	-5.475	0.771685	KLHL20	0	intronic	1.115	7	4	1
1	12	rs7365380	rs2208849	A	G	173831882	0.493	7.167e-08	-5.387	0.716916	GAS5-AS1	0	upstream	2.986	NA	3	1
1	13	rs527825	rs2050701	A	G	183281919	0.3002	0.0004133	3.531	0.622752	NMNAT2	0	intronic	2.645	NA	5	1
1	13	rs527825	rs2050700	T	C	183282196	0.3002	0.0004309	-3.52	0.622752	NMNAT2	0	intronic	3.327	NA	5	1
1	13	rs10911301	rs10911301	A	G	183282575	0.497	3.619e-08	-5.509	1	NMNAT2	0	intronic	2.43	1b	5	1
1	13	rs527825	rs551452	T	C	183283098	0.3002	0.0004021	-3.539	0.622752	NMNAT2	0	intronic	1.292	1f	5	1
1	13	rs527825	rs636315	A	G	183283950	0.3002	0.0003962	-3.543	0.622752	NMNAT2	0	intronic	1.377	NA	5	1
1	13	rs10911301	rs10911302	A	G	183283969	0.494	4.984e-08	5.452	0.98863	NMNAT2	0	intronic	2.711	6	5	1
1	13	rs527825	rs2788066	G	T	183286579	0.2952	NA	NA	0.631038	NMNAT2	0	intronic	0.592	NA	5	1
1	13	rs10911301	rs10911304	T	G	183286581	0.4891	1.853e-07	5.214	0.910935	NMNAT2	0	intronic	0.005	6	5	1
1	13	rs10911301	rs10911305	A	G	183286777	0.4901	1.439e-07	5.26	0.914569	NMNAT2	0	intronic	13.53	6	5	1
1	13	rs10911301	rs10911306	T	C	183287679	0.498	1.091e-07	5.311	0.943255	NMNAT2	0	intronic	6.053	4	2	1
1	13	rs527825	rs1411392	T	C	183290050	0.2952	0.0004933	3.484	0.631038	NMNAT2	0	intronic	8.994	5	2	1
1	13	rs10911301	rs1411393	A	G	183290145	0.4891	2.121e-07	5.188	0.918588	NMNAT2	0	intronic	4.157	6	2	1
1	13	rs527825	rs1411394	T	G	183290194	0.2952	0.0005036	-3.479	0.631038	NMNAT2	0	intronic	2.153	7	2	1
1	13	rs527825	rs2480768	A	G	183290647	0.2952	0.0004559	-3.505	0.631038	NMNAT2	0	intronic	0.037	5	5	1
1	13	rs527825	rs1338371	T	C	183293267	0.2952	0.000457	-3.505	0.631038	NMNAT2	0	intronic	3.352	NA	2	0
1	13	rs10911301	rs10911309	A	G	183293707	0.4901	1.582e-07	-5.243	0.914569	NMNAT2	0	intronic	1.405	7	5	1
1	13	rs527825	rs687392	T	C	183294416	0.2942	0.0004859	-3.488	0.622115	NMNAT2	0	intronic	1.172	NA	5	0
1	13	rs10911301	rs4651152	C	G	183294430	0.4891	1.621e-07	-5.238	0.903894	NMNAT2	0	intronic	9.02	6	5	1
1	13	rs10911301	rs4549998	A	G	183295930	0.4901	1.61e-07	-5.24	0.914569	NMNAT2	0	intronic	3.076	1f	5	1
1	13	rs10911301	rs4630090	T	C	183296270	0.4901	1.537e-07	5.248	0.914569	NMNAT2	0	intronic	2.159	7	5	1
1	13	rs10911301	rs12033696	T	C	183297422	0.4901	1.619e-07	5.239	0.914569	NMNAT2	0	intronic	2.634	4	2	1
1	13	rs10911301	rs12750586	A	G	183297476	0.4901	1.734e-07	5.226	0.914569	NMNAT2	0	intronic	2.939	4	2	1
1	13	rs10911301	rs12122499	A	C	183297613	0.4901	1.754e-07	-5.224	0.914569	NMNAT2	0	intronic	1.672	4	5	1
1	13	rs10911301	rs12122568	A	C	183297826	0.4901	1.716e-07	-5.228	0.914569	NMNAT2	0	intronic	3.473	4	5	1
1	13	rs10911301	rs12130162	T	C	183297930	0.4901	2.086e-07	5.191	0.914569	NMNAT2	0	intronic	1.403	5	5	1
1	13	rs527825	rs543423	A	G	183297931	0.2952	0.0006292	-3.419	0.631038	NMNAT2	0	intronic	2.152	5	5	0
1	13	rs10911301	rs12130199	T	C	183298008	0.4901	1.735e-07	5.226	0.914569	NMNAT2	0	intronic	3.793	5	5	1
1	13	rs10911301	rs12145095	A	G	183298049	0.4901	1.742e-07	5.225	0.914569	NMNAT2	0	intronic	7.496	5	5	1
1	13	rs527825	rs616545	A	G	183298150	0.2952	0.0005154	3.473	0.631038	NMNAT2	0	intronic	14.2	1f	5	0
1	13	rs10911301	rs10911310	C	G	183298219	0.4901	1.903e-07	5.209	0.914569	NMNAT2	0	intronic	0.167	5	5	1
1	13	rs10911301	rs10911311	T	C	183298342	0.4901	1.899e-07	5.209	0.914569	NMNAT2	0	intronic	3.614	7	5	1
1	13	rs10911301	rs10797873	C	G	183298463	0.4901	1.946e-07	5.204	0.914569	NMNAT2	0	intronic	0.05	5	5	1
1	13	rs10911301	rs10797874	T	C	183298495	0.4901	1.917e-07	-5.207	0.914569	NMNAT2	0	intronic	1.395	5	5	1
1	13	rs10911301	rs10797875	T	C	183298502	0.4901	2.002e-07	-5.199	0.914569	NMNAT2	0	intronic	2.899	5	5	1
1	13	rs10911301	rs4651153	T	C	183298610	0.4901	1.87e-07	-5.212	0.914569	NMNAT2	0	intronic	1.281	4	5	1
1	13	rs10911301	rs10911312	A	G	183299013	0.4901	1.556e-07	-5.246	0.914569	NMNAT2	0	intronic	0.685	7	5	1
1	13	rs10911301	rs10911313	A	G	183299153	0.4901	1.866e-07	5.212	0.914569	NMNAT2	0	intronic	4.095	5	5	1
1	13	rs10911301	rs1330224	A	G	183299502	0.4901	1.976e-07	5.202	0.914569	NMNAT2	0	intronic	1.806	NA	5	1
1	13	rs10911301	rs953273	A	G	183299611	0.4901	2.025e-07	-5.197	0.914569	NMNAT2	0	intronic	0.696	4	5	1
1	13	rs527825	rs485677	T	C	183299623	0.2952	0.0005596	-3.45	0.631038	NMNAT2	0	intronic	0.17	NA	5	1
1	13	rs10911301	rs953274	T	C	183299881	0.4901	2.05e-07	-5.195	0.914569	NMNAT2	0	intronic	3.201	4	2	1
1	13	rs10911301	rs952448	T	C	183300112	0.4901	2.022e-07	-5.197	0.914569	NMNAT2	0	intronic	6.696	NA	2	1
1	13	rs10911301	rs952446	A	G	183300311	0.4901	NA	NA	0.914569	NMNAT2	0	intronic	0.51	NA	2	1
1	13	rs10911301	rs2020986	A	G	183300515	0.4901	2.035e-07	5.196	0.914569	NMNAT2	0	intronic	2.822	3a	2	1
1	13	rs527825	rs548208	A	C	183303352	0.2964	0.00273	-2.997	0.629836	NMNAT2	0	intronic	0.077	7	5	0
1	13	rs527825	rs546435	A	C	183303537	0.2952	0.0006169	3.424	0.631038	NMNAT2	0	intronic	1.156	6	5	0
1	13	rs527825	rs584954	T	C	183303730	0.2932	0.0006557	3.407	0.620134	NMNAT2	0	intronic	0.128	7	5	0
1	13	rs527825	rs595617	T	C	183303776	0.2932	0.0007557	-3.369	0.620134	NMNAT2	0	intronic	1.364	6	5	0
1	13	rs527825	rs595697	G	A	183303828	0.2952	NA	NA	0.631038	NMNAT2	0	intronic	1.407	7	5	1
1	13	rs527825	rs543694	G	A	183303837	0.2952	NA	NA	0.631038	NMNAT2	0	intronic	0.392	NA	5	0
1	13	rs527825	rs596670	T	C	183304016	0.2952	0.0006148	3.425	0.631038	NMNAT2	0	intronic	3.711	5	5	0
1	13	rs527825	rs597546	T	C	183304193	0.2952	0.0006196	3.423	0.631038	NMNAT2	0	intronic	3.547	6	5	0
1	13	rs527825	rs518900	C	G	183304250	0.2952	0.0006131	3.426	0.631038	NMNAT2	0	intronic	1.377	6	5	0
1	13	rs527825	rs516210	T	G	183304528	0.2952	0.0006153	-3.425	0.631038	NMNAT2	0	intronic	3.176	5	5	0
1	13	rs527825	rs2811553	T	C	183305435	0.2952	0.0006337	-3.417	0.631038	NMNAT2	0	intronic	0.426	6	5	0
1	13	rs527825	rs2788051	A	G	183305464	0.2952	0.0006309	3.418	0.631038	NMNAT2	0	intronic	4.069	6	5	0
1	13	rs527825	rs644681	T	G	183306465	0.2942	0.0006989	3.39	0.629026	NMNAT2	0	intronic	0.038	6	5	0
1	13	rs527825	rs644711	A	C	183306485	0.2932	0.0006875	3.395	0.627031	NMNAT2	0	intronic	2.327	7	5	0
1	13	rs527825	rs530396	T	C	183306668	0.2952	0.01114	2.538	0.631038	NMNAT2	0	intronic	4.882	7	5	0
1	13	rs527825	rs658205	T	C	183307147	0.2952	0.0007047	-3.388	0.631038	NMNAT2	0	intronic	9.547	5	5	1
1	13	rs527825	rs692998	T	A	183307343	0.2952	NA	NA	0.631038	NMNAT2	0	intronic	8.363	7	5	0
1	13	rs527825	rs4992781	A	G	183307518	0.2952	NA	NA	0.631038	NMNAT2	0	intronic	6.513	7	5	0
1	13	rs527825	rs2811554	A	C	183307874	0.2962	0.0006532	-3.409	0.634156	NMNAT2	0	intronic	0.716	5	5	0
1	13	rs527825	rs2788053	A	G	183307942	0.2962	0.0006557	-3.407	0.634156	NMNAT2	0	intronic	3.973	5	5	0
1	13	rs527825	rs2485928	A	G	183308479	0.2962	0.0007079	3.386	0.634156	NMNAT2	0	intronic	1.111	7	5	1
1	13	rs527825	rs2492290	A	T	183308513	0.2962	0.0006091	-3.428	0.634156	NMNAT2	0	intronic	0.269	7	5	1
1	13	rs527825	rs2485929	A	G	183308548	0.2962	0.0006865	3.395	0.634156	NMNAT2	0	intronic	3.229	7	5	1
1	13	rs527825	rs2485930	A	G	183308787	0.2962	0.0006962	-3.391	0.634156	NMNAT2	0	intronic	2.15	5	5	1
1	13	rs527825	rs1536985	T	C	183308942	0.2962	0.0007253	3.38	0.634156	NMNAT2	0	intronic	4.576	NA	5	1
1	13	rs527825	rs2023245	A	C	183309023	0.2962	0.0007276	3.379	0.634156	NMNAT2	0	intronic	7.042	NA	5	1
1	13	rs527825	rs1536984	A	T	183309101	0.2962	0.0006786	-3.398	0.634156	NMNAT2	0	intronic	0.134	5	5	1
1	13	rs527825	rs1541170	T	C	183309818	0.2962	0.0007607	-3.367	0.634156	NMNAT2	0	intronic	1.603	6	5	1
1	13	rs527825	rs567842	T	C	183310136	0.2962	0.0007981	3.353	0.634156	NMNAT2	0	intronic	3.315	NA	5	1
1	13	rs527825	rs595164	C	G	183310176	0.2962	0.0007772	-3.361	0.634156	NMNAT2	0	intronic	3.665	7	5	1
1	13	rs527825	rs595684	T	C	183310300	0.2962	0.0008317	3.342	0.634156	NMNAT2	0	intronic	1.617	6	5	1
1	13	rs527825	rs595742	A	G	183310326	0.2952	0.0008001	3.353	0.632137	NMNAT2	0	intronic	1.834	7	5	1
1	13	rs527825	rs565959	A	C	183310334	0.2952	0.0008741	3.328	0.632137	NMNAT2	0	intronic	1.069	NA	5	1
1	13	rs527825	rs68149405	G	A	183310823	0.3082	NA	NA	0.625781	NMNAT2	0	intronic	0.676	6	5	0
1	13	rs527825	rs2811556	C	A	183310883	0.2972	NA	NA	0.636192	NMNAT2	0	intronic	0.082	6	5	0
1	13	rs527825	rs537630	A	G	183310981	0.2962	0.0008362	-3.341	0.634156	NMNAT2	0	intronic	3.437	NA	5	1
1	13	rs10911301	rs10911316	T	C	183313912	0.4404	5.025e-07	-5.025	0.734178	NMNAT2	0	intronic	3.3	7	5	1
1	13	rs527825	rs811886	T	C	183314011	0.2952	0.000763	-3.366	0.632137	NMNAT2	0	intronic	0.488	NA	5	0
1	13	rs527825	rs813293	T	C	183314026	0.2952	0.0007672	-3.364	0.632137	NMNAT2	0	intronic	0.863	NA	5	0
1	13	rs10911301	rs944190	T	G	183314293	0.4105	0.007824	2.66	0.67864	NMNAT2	0	intronic	6.211	NA	5	1
1	13	rs10911301	rs1360277	A	T	183314641	0.4095	0.008343	2.638	0.670485	NMNAT2	0	intronic	2.549	5	5	1
1	13	rs527825	rs509168	A	G	183315483	0.2982	0.0007577	-3.368	0.65224	NMNAT2	0	intronic	2.364	NA	5	1
1	13	rs10911301	rs10911317	A	G	183316328	0.493	1.623e-07	5.238	0.962164	NMNAT2	0	intronic	0.068	7	5	1
1	13	rs10911301	rs3924298	T	G	183317819	0.4205	0.0149	-2.435	0.69957	NMNAT2	0	intronic	3.115	6	2	1
1	13	rs527825	rs649614	T	C	183320192	0.3837	3.712e-09	5.897	0.892733	NMNAT2	0	intronic	3.66	NA	5	1
1	13	rs10911301	rs779152	A	G	183322317	0.499	1.723e-07	-5.227	0.9023	NMNAT2	0	intronic	1.213	NA	5	1
1	13	rs527825	rs481157	T	C	183323001	0.3022	0.0006582	-3.406	0.660741	NMNAT2	0	intronic	2.575	NA	5	1
1	13	rs10911301	rs10911318	T	C	183323643	0.4891	1.32e-07	5.276	0.939687	NMNAT2	0	intronic	1.902	6	5	1
1	13	rs527825	rs564146	A	G	183323708	0.3837	3.705e-09	-5.897	0.892733	NMNAT2	0	intronic	0.404	NA	5	1
1	13	rs10911301	rs12125953	A	G	183323804	0.4891	1.295e-07	5.28	0.939687	NMNAT2	0	intronic	0.654	7	5	1
1	13	rs527825	rs681054	T	C	183324354	0.3837	3.524e-09	-5.905	0.892733	NMNAT2	0	intronic	1.195	NA	5	1
1	13	rs527825	rs664422	T	C	183325722	0.3837	3.082e-09	5.927	0.892733	NMNAT2	0	intronic	1.991	5	5	1
1	13	rs527825	rs502870	T	G	183325796	0.3827	4.437e-09	-5.867	0.889123	NMNAT2	0	intronic	3.444	NA	5	1
1	13	rs527825	rs548292	A	G	183326828	0.3837	3.361e-09	-5.913	0.892733	NMNAT2	0	intronic	0.233	NA	5	1
1	13	rs10911301	rs634375	T	C	183327866	0.499	1.33e-07	5.275	0.909562	NMNAT2	0	intronic	5.273	NA	5	1
1	13	rs527825	rs2811557	T	C	183330255	0.3042	0.000395	-3.543	0.657994	NMNAT2	0	intronic	2.921	6	5	1
1	13	rs10911301	rs2811558	T	G	183330413	0.499	1.035e-07	5.32	0.909562	NMNAT2	0	intronic	1.527	5	5	1
1	13	rs527825	rs554395	C	G	183333554	0.3936	6.68e-09	-5.799	0.924631	NMNAT2	0	intronic	11.61	5	2	1
1	13	rs10911301	rs2485931	G	A	183333785	0.499	NA	NA	0.9023	NMNAT2	0	intronic	1.813	7	5	1
1	13	rs527825	rs2788059	A	T	183333805	0.3936	NA	NA	0.924631	NMNAT2	0	intronic	0.123	6	5	0
1	13	rs527825	rs502849	T	C	183335467	0.3936	5.699e-09	-5.825	0.924631	NMNAT2	0	intronic	0.367	5	5	1
1	13	rs527825	rs502937	T	C	183335495	0.3936	6.787e-09	5.796	0.924631	NMNAT2	0	intronic	1.547	5	5	1
1	13	rs527825	rs542349	A	G	183337933	0.3032	0.0004622	-3.502	0.662911	NMNAT2	0	intronic	3.58	NA	2	1
1	13	rs10911301	rs673593	T	G	183338207	0.499	1.595e-07	5.241	0.909562	NMNAT2	0	intronic	1.232	NA	1	1
1	13	rs527825	rs2811559	A	G	183338826	0.3956	4.25e-09	5.874	0.932675	NMNAT2	0	intronic	0.598	5	5	1
1	13	rs527825	rs525138	T	C	183339985	0.2982	0.0002972	-3.618	0.687892	NMNAT2	0	intronic	2.65	NA	5	1
1	13	rs527825	rs526845	C	G	183340129	0.2952	0.0004533	3.507	0.673385	NMNAT2	0	intronic	1.314	4	5	1
1	13	rs527825	rs527825	A	G	183340238	0.3926	1.903e-09	-6.006	1	NMNAT2	0	intronic	0.063	1f	5	1
1	13	rs527825	rs2485932	A	G	183343362	0.3907	2.92e-09	-5.936	0.983601	NMNAT2	0	intronic	0.33	6	5	1
1	13	rs527825	rs2788058	A	G	183345203	0.3926	3.346e-09	-5.914	0.983594	NMNAT2	0	intronic	3.751	NA	5	1
1	13	rs527825	rs2811562	T	G	183345452	0.2992	0.0004897	-3.486	0.682842	NMNAT2	0	intronic	2.238	1f	5	1
1	13	rs527825	rs2788057	A	T	183345707	0.3926	2.945e-09	-5.935	0.983594	NMNAT2	0	intronic	4.852	6	5	1
1	13	rs527825	rs2811563	T	C	183346669	0.3926	3.283e-09	-5.917	0.983594	NMNAT2	0	intronic	4.403	6	5	1
1	13	rs527825	rs1933540	T	C	183347324	0.3926	3.551e-09	-5.904	0.983594	NMNAT2	0	intronic	0.057	NA	5	1
1	13	rs10911301	rs3122177	T	C	183348252	0.4761	1.965e-07	-5.203	0.804839	NMNAT2	0	intronic	0.863	7	5	1
1	13	rs527825	rs1338379	T	C	183349557	0.3946	2.404e-09	5.968	0.99183	NMNAT2	0	intronic	7.586	NA	5	1
1	13	rs527825	rs1338378	A	T	183351256	0.3926	3.613e-09	-5.901	0.983594	NMNAT2	0	intronic	1.645	6	5	1
1	13	rs527825	rs2811565	A	T	183351784	0.2992	0.0005582	3.451	0.682842	NMNAT2	0	intronic	3.607	7	5	1
1	13	rs527825	rs2185081	T	C	183353730	0.2992	0.0005723	3.444	0.682842	NMNAT2	0	intronic	1.924	NA	5	1
1	13	rs527825	rs2022013	T	C	183353853	0.3946	2.759e-09	5.945	0.99183	NMNAT2	0	intronic	0.835	NA	5	1
1	13	rs527825	rs1819628	T	C	183358440	0.2992	0.000713	-3.385	0.682842	NMNAT2	0	intronic	1.183	NA	5	1
1	13	rs10911301	rs2811566	A	G	183362544	0.4781	1.422e-07	5.262	0.827196	NMNAT2	0	intronic	1.578	7	5	1
1	13	rs10911301	rs2788060	T	C	183362646	0.4781	1.702e-07	5.229	0.827196	NMNAT2	0	intronic	1.136	6	5	1
1	13	rs527825	rs7527227	T	C	183368916	0.3002	NA	NA	0.678752	NMNAT2	0	intronic	0.93	7	5	1
1	13	rs10911301	rs9425595	T	C	183369036	0.4781	NA	NA	0.827196	NMNAT2	0	intronic	0.087	7	5	1
1	13	rs10911301	rs12145853	A	G	183369250	0.4781	NA	NA	0.827196	NMNAT2	0	intronic	4.199	6	5	1
1	13	rs527825	rs9727605	A	C	183369460	0.3002	NA	NA	0.678752	NMNAT2	0	intronic	6.898	7	5	1
1	13	rs527825	rs6676089	T	C	183369779	0.3002	NA	NA	0.678752	NMNAT2	0	intronic	3.179	6	5	1
1	13	rs527825	rs6663425	G	A	183369780	0.3002	NA	NA	0.678752	NMNAT2	0	intronic	4.176	6	5	1
1	13	rs10911301	rs6690052	A	T	183370057	0.4781	1.519e-07	-5.25	0.827196	NMNAT2	0	intronic	0.499	6	5	1
1	13	rs527825	rs3120798	T	C	183373665	0.2992	0.0007793	-3.36	0.675659	NMNAT2	0	intronic	3.77	1f	5	1
1	13	rs527825	rs3120799	A	G	183373841	0.2992	0.0007795	-3.36	0.675659	NMNAT2	0	intronic	2.388	5	5	1
1	13	rs527825	rs2788061	A	G	183374040	0.2992	0.0007923	-3.355	0.675659	NMNAT2	0	intronic	0.519	5	5	1
1	13	rs527825	rs10732975	T	C	183374722	0.3091	0.0009244	3.313	0.635966	NMNAT2	0	intronic	1.147	5	5	1
1	13	rs527825	rs2788063	T	C	183375311	0.2992	0.0008316	-3.342	0.675659	NMNAT2	0	intronic	2.019	1f	5	1
1	13	rs527825	rs2702183	A	G	183375601	0.2992	0.0007804	-3.36	0.675659	NMNAT2	0	intronic	2.841	NA	5	1
1	13	rs527825	rs2788065	T	C	183377675	0.2992	0.0007537	-3.369	0.675659	NMNAT2	0	intronic	3.585	5	5	1
1	13	rs527825	rs1361197	T	C	183380407	0.4056	8.819e-09	-5.752	0.940549	NMNAT2	0	intronic	0.336	5	5	1
1	13	rs10911301	rs1361198	T	G	183380611	0.4692	2.542e-07	-5.155	0.855041	NMNAT2	0	intronic	2.128	6	5	1
1	13	rs527825	rs2485935	T	G	183380702	0.2992	0.0008252	-3.344	0.675659	NMNAT2	0	intronic	2.236	7	5	1
1	13	rs527825	rs7539430	T	C	183381444	0.3221	0.0009552	3.303	0.670825	NMNAT2	0	intronic	0.132	7	5	1
1	13	rs527825	rs7539602	A	C	183381613	0.3221	0.0008644	3.331	0.670825	NMNAT2	0	intronic	1.046	6	5	1
1	13	rs527825	rs10911330	T	G	183382989	0.3221	0.0008926	3.322	0.670825	NMNAT2	0	intronic	0.259	6	5	1
1	13	rs527825	rs2788043	A	T	183383362	0.3121	0.0006758	3.399	0.709387	NMNAT2	0	intronic	0.11	6	5	1
1	13	rs10911301	rs4652800	T	C	183383643	0.4692	2.258e-07	-5.177	0.855041	NMNAT2	0	intronic	0.199	4	5	1
1	13	rs10911301	rs12745288	A	G	183384395	0.4692	2.274e-07	5.175	0.855041	NMNAT2	0	intronic	3.412	7	5	1
1	13	rs527825	rs2788045	A	G	183384796	0.3121	0.0009551	3.303	0.709387	NMNAT2	0	intronic	3.866	7	5	1
1	13	rs10911301	rs12035399	A	G	183386537	0.4732	1.106e-07	-5.308	0.838336	NMNAT2	0	intronic	8.618	4	1	1
1	13	rs527825	rs1815590	T	C	183386828	0.2992	0.0008304	3.342	0.667564	NMNAT2	0	intronic	8.643	4	1	1
1	13	rs10911301	rs12074508	T	C	183388259	0.4712	2.327e-07	-5.171	0.832177	NMNAT2	0	upstream	1.252	7	5	1
1	13	rs527825	rs2702189	T	C	183389150	0.2972	0.0006225	3.422	0.670448	NMNAT2	1413	intergenic	7.638	7	5	1
1	13	rs527825	rs2788047	A	G	183389460	0.2972	0.0005272	-3.467	0.670448	NMNAT2	1723	intergenic	2.594	7	5	1
1	13	rs527825	rs2788048	A	G	183389877	0.2972	0.0004203	-3.527	0.670448	NMNAT2	2140	intergenic	1.099	6	5	1
1	13	rs527825	rs2702191	A	T	183391524	0.2972	0.0004009	3.539	0.670448	NMNAT2	3787	intergenic	7.308	7	5	1
1	13	rs10911301	rs12731807	T	G	183394037	0.4702	1.044e-07	5.319	0.843199	NMNAT2	6300	intergenic	4.782	5	13	1
1	13	rs527825	rs2485937	T	G	183394535	0.2972	0.0004224	-3.526	0.670448	NMNAT2	6798	intergenic	1.669	7	13	1
1	13	rs527825	rs2702196	T	C	183396348	0.2962	NA	NA	0.668331	NMNAT2	8611	intergenic	1.133	7	5	1
1	13	rs527825	rs2464366	T	C	183396401	0.2972	NA	NA	0.670448	NMNAT2	8664	intergenic	0.045	7	5	1
1	13	rs527825	rs2264754	A	G	183396427	0.2972	NA	NA	0.663305	NMNAT2	8690	intergenic	1.105	7	5	0
1	13	rs527825	rs2485938	A	G	183396474	0.2972	NA	NA	0.663305	NMNAT2	8737	intergenic	0.103	6	5	0
1	13	rs527825	rs2485939	A	T	183396610	0.2962	NA	NA	0.668331	NMNAT2	8873	intergenic	1.606	7	5	1
1	13	rs527825	rs2702197	A	C	183397041	0.2962	NA	NA	0.668331	NMNAT2	9304	intergenic	0.729	5	5	1
1	13	rs527825	rs2702198	A	G	183397087	0.2962	NA	NA	0.668331	NMNAT2	9350	intergenic	0.749	6	5	1
1	13	rs527825	rs2811551	A	C	183397589	0.2962	0.000476	3.494	0.668331	NMNAT2	9852	intergenic	1.299	6	5	1
1	13	rs527825	rs2993476	C	G	183398233	0.2962	0.0004651	3.5	0.668331	NMNAT2	10496	intergenic	0.015	6	5	1
1	13	rs527825	rs4652801	T	G	183398527	0.2992	0.0007671	3.364	0.661408	NMNAT2	10790	intergenic	8.252	5	5	1
1	13	rs10911301	rs1338373	A	G	183399613	0.4563	1.528e-06	4.808	0.800266	NMNAT2	11876	intergenic	14.02	NA	5	1
1	13	rs527825	rs2788056	T	C	183400890	0.2982	0.0007863	-3.358	0.666387	NMNAT2	13153	intergenic	1.443	NA	5	1
1	13	rs10911301	rs10752912	A	G	183401215	0.4563	2.138e-06	4.74	0.800266	NMNAT2	13478	intergenic	1.521	4	5	1
1	13	rs10911301	rs2023600	T	C	183401670	0.4871	1.828e-07	-5.216	0.80752	NMNAT2	13933	intergenic	1.435	NA	5	1
1	13	rs527825	rs2702199	T	C	183401880	0.2972	0.0008645	-3.331	0.671393	NMNAT2	14143	intergenic	3.218	4	5	1
1	13	rs10911301	rs12074081	A	G	183402201	0.4563	1.123e-06	4.869	0.800266	NMNAT2	14464	intergenic	0.106	6	5	1
1	13	rs10911301	rs7531089	C	G	183403843	0.4592	1.189e-07	5.295	0.608782	NMNAT2	16106	intergenic	9.504	6	1	1
1	13	rs4652802	rs10911334	C	G	183405382	0.4284	3.158e-09	-5.923	0.987608	NMNAT2	17645	intergenic	0.029	6	5	1
1	13	rs4652802	rs6424896	T	C	183405648	0.4901	2.671e-08	5.562	0.746302	NMNAT2	17911	intergenic	0.774	7	5	1
1	13	rs4652802	rs6684015	A	G	183405794	0.4901	2.863e-08	-5.55	0.746302	NMNAT2	18057	intergenic	2.479	1f	5	1
1	13	rs4652802	rs6659327	A	G	183405853	0.4911	2.529e-08	5.571	0.743151	NMNAT2	18116	intergenic	3.759	6	5	1
1	13	rs4652802	rs3965889	A	G	183407953	0.4274	3.059e-09	5.928	0.991698	NMNAT2	20216	intergenic	3.887	7	5	1
1	13	rs4652802	rs2333659	T	G	183409445	0.4632	NA	NA	0.662346	SMG7-AS1	20564	intergenic	0.049	6	5	0
1	13	rs4652802	rs12039578	A	G	183413886	0.4284	2.258e-09	-5.978	0.995871	SMG7-AS1	16123	intergenic	4.782	5	5	1
1	13	rs4652802	rs17558314	T	C	183415188	0.4284	2.514e-09	-5.961	0.995871	SMG7-AS1	14821	intergenic	8.976	6	5	1
1	13	rs4652802	rs4047801	A	G	183415318	0.4911	3.036e-08	5.539	0.751269	SMG7-AS1	14691	intergenic	3.028	6	5	1
1	13	rs4652802	rs11808408	A	G	183415589	0.4284	2.231e-09	-5.98	0.987552	SMG7-AS1	14420	intergenic	0.73	7	5	1
1	13	rs4652802	rs3856126	T	G	183416374	0.4284	2.255e-09	-5.978	0.995871	SMG7-AS1	13635	intergenic	1.564	6	5	1
1	13	rs4652802	rs11580188	C	G	183422622	0.329	0.0003152	3.602	0.673086	SMG7-AS1	7387	intergenic	1.495	5	5	1
1	13	rs4652802	rs7550777	T	C	183425047	0.4274	2.407e-09	-5.968	1	SMG7-AS1	4962	intergenic	0.519	5	5	1
1	13	rs4652802	rs4652802	A	G	183426758	0.4274	2.219e-09	5.981	1	SMG7-AS1	3251	intergenic	12	6	5	1
1	13	rs4652802	rs3905118	T	C	183441977	0.335	0.0002233	-3.691	0.652151	SMG7	0	intronic	7.005	NA	1	1
1	13	rs4652802	rs11583652	G	A	183446715	0.331	NA	NA	0.639695	SMG7	0	intronic	0.584	6	2	1
1	13	rs4652802	rs2226099	T	C	183449357	0.335	0.0002458	-3.667	0.653309	SMG7	0	intronic	0.796	7	2	1
1	13	rs4652802	rs4652806	T	C	183456476	0.335	0.0002475	-3.665	0.652151	SMG7	0	intronic	11.86	6	4	1
1	13	rs4652802	rs11587738	T	C	183463271	0.335	0.0002424	-3.67	0.652151	SMG7	0	intronic	0.165	5	4	1
1	13	rs4652802	rs2877978	A	G	183496658	0.336	0.0002914	3.623	0.647213	SMG7	0	intronic	0.035	6	4	1
1	13	rs4652802	rs9425305	C	T	183512085	0.334	NA	NA	0.649016	SMG7	0	intronic	1.014	7	4	0
1	13	rs4652802	rs9425306	A	G	183529654	0.331	0.0005574	-3.452	0.664022	NCF2	0	intronic	5.489	6	4	1
1	14	rs1953522	rs10863262	T	C	216825980	0.3211	4.276e-07	-5.056	0.77894	ESRRG	0	intronic	4.585	NA	5	0
1	14	rs1953522	rs1953522	A	C	216837241	0.3797	2.472e-08	-5.575	1	ESRRG	0	intronic	4.088	NA	5	0
2	15	rs12713315	rs62167289	T	C	56413253	0.2127	2.19e-06	4.735	0.654873	ENSG00000271894	0	ncRNA_intronic	7.026	4	1	0
2	15	rs12713315	rs62167290	T	C	56413281	0.2127	1.72e-06	4.784	0.654873	ENSG00000271894	0	ncRNA_intronic	12.69	2b	1	0
2	15	rs12713315	rs11694431	A	G	56416599	0.2117	2.55e-06	4.704	0.658613	ENSG00000271894	0	ncRNA_intronic	1.595	6	5	0
2	15	rs12713315	rs11694444	T	C	56416772	0.2117	2.714e-06	4.691	0.658613	ENSG00000271894	0	ncRNA_intronic	0.058	7	5	0
2	15	rs12713315	rs11695826	C	G	56417211	0.2127	2.298e-06	4.725	0.661954	ENSG00000271894	0	ncRNA_intronic	1.419	5	4	0
2	15	rs12713315	rs1030090	T	C	56439314	0.2525	5.554e-05	4.031	0.703257	ENSG00000271894	0	ncRNA_intronic	3.558	NA	5	1
2	15	rs12713315	rs59813060	A	T	56443479	0.2237	2.236e-06	-4.731	0.81464	ENSG00000271894	0	ncRNA_intronic	2.47	7	5	0
2	15	rs12713315	rs17047623	T	C	56443708	0.2237	2.205e-06	4.734	0.81464	ENSG00000271894	0	ncRNA_intronic	1.67	6	5	0
2	15	rs12713315	rs1549028	C	G	56451039	0.2227	2.986e-06	4.672	0.819525	ENSG00000271894	0	ncRNA_intronic	1.291	6	5	0
2	15	rs12713315	rs6545560	A	G	56452097	0.2247	2.31e-06	-4.724	0.818348	ENSG00000271894	0	ncRNA_intronic	0.107	6	5	0
2	15	rs12713315	rs12713315	T	C	56458509	0.2594	3.313e-08	-5.524	1	ENSG00000271894	0	ncRNA_intronic	0.063	7	2	0
2	15	rs12713315	rs985792	T	G	56464559	0.2237	3.214e-06	-4.657	0.823227	ENSG00000271894	0	ncRNA_intronic	6.46	NA	5	0
2	15	rs12713315	rs17047680	A	G	56466964	0.2247	1.187e-06	4.858	0.818348	ENSG00000271894	0	ncRNA_intronic	3.357	5	5	0
2	15	rs12713315	rs6759030	A	C	56467748	0.2237	2.187e-06	-4.735	0.823227	ENSG00000271894	0	ncRNA_intronic	0.364	7	5	0
2	15	rs12713315	rs2080606	C	G	56472393	0.2356	1.872e-06	4.767	0.879195	ENSG00000271894	0	ncRNA_intronic	7.06	5	5	0
2	15	rs12713315	rs214046	T	C	56491604	0.2515	1.959e-06	4.758	0.784934	ENSG00000271894	0	ncRNA_intronic	0.882	NA	5	0
2	15	rs12713315	rs214045	A	G	56496589	0.2624	2.017e-06	4.752	0.741479	ENSG00000271894	0	ncRNA_intronic	2.204	NA	5	0
2	16	rs889956	rs17298978	T	C	57203530	0.3688	7.788e-05	-3.951	0.73964	ENSG00000238690	39666	intergenic	0.194	7	9	0
2	16	rs889956	rs34178507	T	C	57203875	0.3688	7.702e-05	-3.953	0.73964	ENSG00000238690	39321	intergenic	0.083	7	9	0
2	16	rs889956	rs12612912	A	G	57210018	0.4622	0.0003051	-3.611	0.610094	ENSG00000238690	33178	intergenic	1.201	6	9	1
2	16	rs889956	rs12619563	A	T	57213078	0.3648	2.544e-05	-4.211	0.672494	ENSG00000238690	30118	intergenic	0.019	5	9	0
2	16	rs889956	rs7592397	A	G	57213587	0.3767	5.773e-05	4.022	0.710767	ENSG00000238690	29609	intergenic	2.442	7	9	0
2	16	rs889956	rs1366798	T	G	57218797	0.4652	0.0007093	-3.386	0.61911	ENSG00000238690	24399	intergenic	8.245	6	9	1
2	16	rs889956	rs9789665	T	G	57219996	0.4056	5.077e-05	4.052	0.670107	ENSG00000238690	23200	intergenic	0.172	7	9	0
2	16	rs889956	rs9789567	A	G	57220127	0.3946	NA	NA	0.651452	ENSG00000238690	23069	intergenic	3.711	7	9	0
2	16	rs889956	rs12994359	T	C	57221708	0.4066	0.0005832	-3.439	0.627504	ENSG00000238690	21488	intergenic	1.315	6	9	0
2	16	rs889956	rs2115606	A	G	57238715	0.3807	6.902e-05	-3.98	0.698257	ENSG00000238690	4481	intergenic	0.13	NA	9	0
2	16	rs889956	rs2902969	A	G	57243213	0.4006	6.568e-05	-3.991	0.688173	ENSG00000238690	0	ncRNA_exonic	0.132	6	9	0
2	16	rs889956	rs11682352	A	G	57243669	0.3867	NA	NA	0.714074	ENSG00000238690	0	upstream	13.08	7	15	0
2	16	rs889956	rs71416462	G	T	57245066	0.3946	NA	NA	0.694204	ENSG00000238690	1767	intergenic	1.772	7	15	0
2	16	rs889956	rs201698334	C	T	57245069	0.4125	NA	NA	0.640102	ENSG00000238690	1770	intergenic	0.55	7	15	0
2	16	rs889956	rs199970096	T	G	57245426	0.4046	NA	NA	0.679178	ENSG00000238690	2127	intergenic	0.198	7	15	0
2	16	rs889956	rs144902484	A	G	57246100	0.4006	NA	NA	0.686805	ENSG00000238690	2801	intergenic	3.545	7	15	0
2	16	rs889956	rs12614256	A	G	57246394	0.3917	NA	NA	0.706822	ENSG00000238690	3095	intergenic	5.946	7	15	0
2	16	rs889956	rs35557355	A	T	57246794	0.4105	0.000194	3.727	0.650019	ENSG00000238690	3495	intergenic	9.71	6	15	0
2	16	rs889956	rs1864274	A	T	57247176	0.4185	0.0004045	3.537	0.636809	ENSG00000238690	3877	intergenic	2.181	7	9	0
2	16	rs889956	rs12615090	A	G	57247331	0.4185	0.0004796	-3.492	0.636809	ENSG00000238690	4032	intergenic	0.099	7	9	0
2	16	rs889956	rs6545619	T	C	57250334	0.3996	6.035e-05	-4.011	0.696062	ENSG00000238690	7035	intergenic	0.972	6	9	0
2	16	rs889956	rs6725352	A	G	57251133	0.4006	6.088e-05	-4.009	0.692386	ENSG00000238690	7834	intergenic	0.537	6	9	0
2	16	rs889956	rs12713322	T	C	57251353	0.3986	5.484e-05	-4.034	0.691466	ENSG00000238690	8054	intergenic	1.037	5	9	0
2	16	rs889956	rs6729976	A	G	57252485	0.3986	5.219e-05	-4.046	0.699753	ENSG00000238690	9186	intergenic	0.823	7	9	0
2	16	rs889956	rs1594144	A	G	57254381	0.3986	5.139e-05	4.049	0.699753	ENSG00000238690	11082	intergenic	3.551	NA	9	0
2	16	rs889956	rs13033975	A	G	57255375	0.3857	1.367e-05	4.349	0.730216	ENSG00000238690	12076	intergenic	4.583	7	9	0
2	16	rs889956	rs1429316	T	C	57259615	0.3917	1.934e-05	-4.272	0.71982	ENSG00000271115	15870	intergenic	2.158	NA	9	0
2	16	rs889956	rs11886848	T	C	57266771	0.3936	2.018e-05	4.263	0.720534	ENSG00000271115	8714	intergenic	3.801	6	7	0
2	16	rs889956	rs11903925	A	G	57267524	0.3936	1.407e-05	-4.343	0.720534	ENSG00000271115	7961	intergenic	2.781	6	9	0
2	16	rs889956	rs2115603	A	G	57270600	0.3996	1.373e-05	4.348	0.762211	ENSG00000271115	4885	intergenic	5.321	6	9	0
2	16	rs889956	rs11125686	A	G	57271705	0.3887	1.384e-05	-4.346	0.734134	ENSG00000271115	3780	intergenic	0.085	5	9	0
2	16	rs889956	rs7592094	A	G	57273562	0.3827	3.97e-05	4.109	0.69994	ENSG00000271115	1923	intergenic	4.145	5	9	0
2	16	rs889956	rs12614157	A	G	57276155	0.3787	3.98e-05	-4.109	0.713387	ENSG00000271115	0	ncRNA_exonic	9.631	7	9	0
2	16	rs889956	rs13014873	A	C	57277288	0.3877	1.963e-05	-4.269	0.738061	ENSG00000271115	0	upstream	3.346	7	9	0
2	16	rs889956	rs1429308	T	C	57278304	0.3996	3.377e-06	4.646	0.780089	ENSG00000271115	1833	intergenic	0.541	NA	9	0
2	16	rs889956	rs11125688	A	G	57284436	0.3777	3.769e-05	-4.121	0.717397	ENSG00000271115	7965	intergenic	3.294	7	9	0
2	16	rs889956	rs12613892	T	C	57286110	0.3767	6.085e-05	-4.009	0.720282	ENSG00000271115	9639	intergenic	5.454	7	15	0
2	16	rs889956	rs11890717	G	C	57288113	0.3827	NA	NA	0.69994	ENSG00000271115	11642	intergenic	12.18	5	9	0
2	16	rs889956	rs11681356	C	G	57288661	0.3976	1.908e-05	4.275	0.768888	ENSG00000271115	12190	intergenic	0.231	7	9	0
2	16	rs889956	rs13028110	A	G	57289907	0.3996	1.945e-05	4.271	0.762211	ENSG00000271115	13436	intergenic	3.113	6	9	0
2	16	rs889956	rs11125689	A	G	57291909	0.3996	1.975e-05	4.268	0.762211	ENSG00000271115	15438	intergenic	4.385	6	9	0
2	16	rs889956	rs11125690	C	G	57292845	0.3897	1.894e-05	4.277	0.731319	ENSG00000271115	16374	intergenic	0.2	7	9	0
2	16	rs889956	rs56404507	A	G	57294291	0.3509	NA	NA	0.614947	ENSG00000271115	17820	intergenic	1.703	7	14	0
2	16	rs889956	rs10496062	T	C	57300389	0.3897	4.703e-05	-4.07	0.737062	ENSG00000271115	23918	intergenic	0.309	6	9	0
2	16	rs889956	rs12995674	T	C	57301014	0.3887	1.479e-05	4.332	0.735223	ENSG00000271115	24543	intergenic	3.641	5	9	0
2	16	rs889956	rs12988904	A	G	57303414	0.4006	1.052e-05	4.406	0.758406	ENSG00000271115	26943	intergenic	4.433	5	7	0
2	16	rs889956	rs1863047	A	G	57304613	0.3827	3.724e-05	-4.124	0.765348	ENSG00000271115	28142	intergenic	5.472	7	5	0
2	16	rs889956	rs1863048	A	C	57304659	0.3946	1.829e-05	4.285	0.780505	ENSG00000271115	28188	intergenic	1.999	6	5	0
2	16	rs889956	rs11691347	A	C	57305317	0.3837	2.196e-05	-4.244	0.753929	ENSG00000271115	28846	intergenic	2.759	6	5	0
2	16	rs889956	rs718351	A	T	57305425	0.3837	2.727e-05	4.195	0.753929	ENSG00000271115	28954	intergenic	0.887	7	5	0
2	16	rs889956	rs62160043	C	G	57306388	0.3767	3.273e-05	4.154	0.722581	ENSG00000271115	29917	intergenic	2.454	7	5	0
2	16	rs889956	rs11679661	A	T	57308235	0.3877	2.244e-05	-4.239	0.74136	ENSG00000271115	31764	intergenic	4.429	5	9	0
2	16	rs889956	rs1834183	T	C	57314264	0.3877	2.669e-05	4.2	0.738061	ENSG00000271115	37793	intergenic	5.707	NA	9	0
2	16	rs889956	rs1424639	T	C	57314322	0.3837	3.656e-05	-4.128	0.753929	ENSG00000271115	37851	intergenic	7.752	NA	9	0
2	16	rs889956	rs12998956	A	G	57315202	0.3887	2.074e-05	-4.257	0.735223	ENSG00000271115	38731	intergenic	0.138	5	9	0
2	16	rs889956	rs13014530	A	G	57317846	0.3777	4.692e-05	-4.07	0.718564	ENSG00000271115	41375	intergenic	1.971	6	9	0
2	16	rs889956	rs34299282	A	G	57324679	0.3767	5.494e-05	-4.034	0.726153	ENSG00000271115	48208	intergenic	1.655	6	9	0
2	16	rs889956	rs34722958	A	G	57324977	0.3718	2.652e-05	-4.201	0.740704	ENSG00000271115	48506	intergenic	1.908	6	9	0
2	16	rs889956	rs35043826	T	C	57328928	0.3946	1.181e-05	4.381	0.780505	ENSG00000271115	52457	intergenic	7.73	7	9	0
2	16	rs889956	rs1579346	A	G	57329345	0.3926	1.652e-05	4.307	0.780813	ENSG00000271115	52874	intergenic	10.94	NA	9	0
2	16	rs889956	rs1559556	A	G	57332617	0.3936	8.23e-06	4.459	0.784409	ENSG00000271115	56146	intergenic	7.963	5	7	0
2	16	rs889956	rs11125693	T	C	57334041	0.3827	1.504e-05	-4.328	0.757936	ENSG00000271115	57570	intergenic	2.356	7	5	0
2	16	rs889956	rs1345942	T	C	57335044	0.3986	1.537e-05	4.323	0.761741	ENSG00000271115	58573	intergenic	1.139	6	7	0
2	16	rs889956	rs6746111	C	G	57337419	0.3748	2.334e-05	4.23	0.722291	ENSG00000271115	60948	intergenic	6.018	7	9	0
2	16	rs889956	rs6746218	T	C	57337487	0.3708	4.091e-05	-4.102	0.736432	ENSG00000271115	61016	intergenic	5.67	6	9	0
2	16	rs889956	rs7557284	A	G	57341448	0.3847	9.807e-06	-4.421	0.749938	ENSG00000271115	64977	intergenic	1.658	7	9	0
2	16	rs889956	rs34140847	T	C	57344193	0.3807	1.171e-05	-4.383	0.764004	ENSG00000271115	67722	intergenic	0.962	5	7	0
2	16	rs889956	rs2859970	T	C	57344785	0.3897	6.476e-06	4.51	0.784175	ENSG00000271115	68314	intergenic	1.564	NA	9	0
2	16	rs889956	rs1424646	T	G	57345571	0.3917	5.34e-06	4.551	0.783798	ENSG00000271115	69100	intergenic	0.589	7	9	0
2	16	rs889956	rs13014038	A	C	57347944	0.3907	7.611e-06	4.476	0.794424	ENSG00000271115	71473	intergenic	0.138	6	9	0
2	16	rs889956	rs13019473	T	C	57348260	0.3897	7.983e-06	-4.466	0.789923	ENSG00000271115	71789	intergenic	1.546	6	9	0
2	16	rs889956	rs2059387	T	G	57352315	0.3887	NA	NA	0.793066	ENSG00000271115	75844	intergenic	0.067	6	9	0
2	16	rs889956	rs17188812	A	G	57354454	0.3887	1.472e-05	4.333	0.793066	ENSG00000271115	77983	intergenic	7.686	7	9	0
2	16	rs889956	rs11688471	A	T	57354970	0.3887	1.184e-05	-4.381	0.793066	ENSG00000271115	78499	intergenic	3.156	6	9	0
2	16	rs889956	rs1593235	A	G	57355662	0.3887	1.312e-05	4.358	0.793066	ENSG00000271115	79191	intergenic	0.995	6	9	0
2	16	rs889956	rs34139783	A	G	57356774	0.3887	7.013e-06	4.493	0.793066	ENSG00000271115	80303	intergenic	2.82	6	9	0
2	16	rs889956	rs13004185	A	G	57358730	0.3887	1.007e-05	-4.416	0.793066	ENSG00000271115	82259	intergenic	4.02	6	9	0
2	16	rs889956	rs13010853	A	G	57359683	0.3897	7.429e-06	4.481	0.797551	ENSG00000271115	83212	intergenic	0.517	7	9	0
2	16	rs889956	rs11888958	A	G	57359981	0.3897	8.516e-06	4.452	0.797551	ENSG00000271115	83510	intergenic	14.53	7	9	0
2	16	rs889956	rs55966827	A	G	57360853	0.3946	1.535e-05	-4.324	0.782435	ENSG00000271115	84382	intergenic	0.8	7	9	0
2	16	rs889956	rs58641950	A	T	57361469	0.4006	2.825e-06	-4.683	0.758406	ENSG00000271115	84998	intergenic	5.61	6	9	0
2	16	rs889956	rs13025563	A	C	57361983	0.3897	1.17e-05	-4.383	0.797551	ENSG00000271115	85512	intergenic	3.939	7	9	0
2	16	rs889956	rs11125695	T	C	57362389	0.3887	9.383e-06	-4.431	0.793919	ENSG00000271115	85918	intergenic	0.862	6	9	0
2	16	rs889956	rs17796910	A	T	57362756	0.3897	1.069e-05	4.403	0.797551	ENSG00000271115	86285	intergenic	0.378	7	9	0
2	16	rs889956	rs17796928	A	G	57362978	0.3897	8.834e-06	-4.444	0.797551	ENSG00000271115	86507	intergenic	2.679	7	9	0
2	16	rs889956	rs17189185	A	C	57364860	0.3897	1.164e-05	-4.384	0.797551	ENSG00000271115	88389	intergenic	2.315	6	9	0
2	16	rs889956	rs62158434	A	T	57365305	0.3897	1.004e-05	4.416	0.797551	ENSG00000271115	88834	intergenic	0.504	6	9	0
2	16	rs889956	rs66540826	A	T	57365416	0.3897	1.267e-05	4.366	0.797551	ENSG00000271115	88945	intergenic	0.073	6	9	0
2	16	rs889956	rs17189361	T	G	57366620	0.3897	8.838e-06	4.444	0.797551	ENSG00000271115	90149	intergenic	2.015	4	9	0
2	16	rs889956	rs11694571	C	G	57367438	0.3907	7.47e-06	4.48	0.794424	ENSG00000271115	90967	intergenic	0.756	6	9	0
2	16	rs889956	rs35068051	A	G	57367644	0.3907	7.341e-06	4.484	0.794424	ENSG00000271115	91173	intergenic	6.721	5	9	0
2	16	rs889956	rs35180076	T	G	57367798	0.3907	6.644e-06	4.505	0.794424	ENSG00000271115	91327	intergenic	2.844	3a	9	0
2	16	rs889956	rs1424647	T	G	57369920	0.3807	1.457e-05	-4.335	0.749138	ENSG00000271115	93449	intergenic	0.599	6	7	0
2	16	rs889956	rs1424649	T	C	57370124	0.3797	1.553e-05	4.321	0.753188	ENSG00000271115	93653	intergenic	4.561	6	7	0
2	16	rs889956	rs1582644	T	C	57374265	0.3926	2.879e-07	-5.131	0.866111	ENSG00000271115	97794	intergenic	0.229	5	9	0
2	16	rs889956	rs1834186	A	T	57375039	0.4026	1.959e-07	5.203	0.915881	ENSG00000271115	98568	intergenic	4.667	7	9	0
2	16	rs889956	rs11125696	A	C	57375605	0.4026	2.406e-07	5.165	0.907815	ENSG00000271115	99134	intergenic	0.077	6	9	0
2	16	rs889956	rs6729063	A	G	57382953	0.4026	1.179e-07	-5.297	0.915881	ENSG00000271115	106482	intergenic	0.906	7	9	0
2	16	rs889956	rs6729156	A	G	57383028	0.4026	1.17e-07	-5.298	0.915881	ENSG00000271115	106557	intergenic	2.536	7	7	0
2	16	rs889956	rs6732134	A	G	57383073	0.3926	1.198e-07	-5.294	0.873992	ENSG00000271115	106602	intergenic	2.179	7	7	0
2	16	rs889956	rs3948495	T	G	57383133	0.4026	1.168e-07	-5.298	0.915881	ENSG00000271115	106662	intergenic	0.054	7	7	0
2	16	rs889956	rs11680638	T	G	57384875	0.4026	9.819e-08	5.33	0.923983	ENSG00000271115	108404	intergenic	2.556	7	5	0
2	16	rs889956	rs11690172	A	G	57387094	0.4006	1.446e-07	5.259	0.923291	ENSG00000271115	110623	intergenic	4.566	7	9	0
2	16	rs889956	rs966115	T	G	57387855	0.3847	1.03e-07	-5.321	0.987175	ENSG00000271115	111384	intergenic	6.758	7	7	0
2	16	rs889956	rs1540395	T	C	57389716	0.3857	1.243e-07	5.287	0.983102	ENSG00000271115	113245	intergenic	0.965	7	5	0
2	16	rs889956	rs34674005	A	G	57390151	0.3837	1.189e-07	-5.295	0.991483	ENSG00000271115	113680	intergenic	2.816	6	5	0
2	16	rs889956	rs6734341	T	C	57390456	0.3847	1.429e-07	5.262	0.987257	ENSG00000271115	113985	intergenic	2.701	7	7	0
2	16	rs889956	rs6734564	T	C	57390648	0.3847	1.406e-07	5.264	0.987257	ENSG00000271115	114177	intergenic	5.409	6	7	0
2	16	rs889956	rs17798206	T	G	57391145	0.3857	1.495e-07	5.253	0.982976	ENSG00000271115	114674	intergenic	3.73	5	7	0
2	16	rs889956	rs17190884	A	G	57395905	0.3827	1.384e-07	-5.267	0.987282	ENSG00000271115	119434	intergenic	0.839	6	7	0
2	16	rs889956	rs17798624	A	T	57395966	0.3837	1.605e-07	5.24	0.983073	ENSG00000271115	119495	intergenic	1.38	7	7	0
2	16	rs889956	rs11900101	T	C	57396482	0.3837	2.104e-07	5.19	0.982963	ENSG00000271115	120011	intergenic	6.653	6	9	0
2	16	rs889956	rs12994798	C	G	57397464	0.3817	1.662e-07	-5.234	0.983118	ENSG00000271115	120993	intergenic	0.321	6	9	0
2	16	rs889956	rs727280	T	C	57397839	0.3827	1.285e-07	-5.281	0.987282	ENSG00000271115	121368	intergenic	5.175	7	9	0
2	16	rs889956	rs1593228	A	G	57400136	0.3946	1.519e-07	5.25	0.946259	ENSG00000271115	123665	intergenic	0.431	6	5	0
2	16	rs889956	rs35471249	A	C	57402025	0.3857	6.642e-08	5.401	1	ENSG00000271115	125554	intergenic	16	5	14	0
2	16	rs889956	rs984362	A	G	57402954	0.3857	6.406e-08	-5.407	1	ENSG00000271115	126483	intergenic	1.422	6	7	0
2	16	rs889956	rs984363	A	G	57403044	0.3857	6.884e-08	-5.394	1	ENSG00000271115	126573	intergenic	1.465	6	9	0
2	16	rs889956	rs889956	A	G	57404834	0.3857	4.969e-08	-5.452	1	ENSG00000271115	128363	intergenic	6.644	7	9	0
2	16	rs889956	rs1424636	A	G	57405979	0.3867	6.318e-08	-5.41	0.995739	ENSG00000271115	129508	intergenic	0.976	7	5	0
[truncated: 20,379 more rows]
