# Supplementary material for: Study of 300,486 individuals identifies 148 independent genetic loci influencing general cognitive function
Source: Nat Commun. 2018 May 29;9:2098. doi: 10.1038/s41467-018-04362-x (PMC5974083; doi:10.1038/s41467-018-04362-x)
Supplement: Supplementary file 8 — Supplementary Data 5 [file 41467_2018_4362_MOESM8_ESM.xlsx]

## Sheet: Sheet1
Supplementary Data 5. Independent significant SNPs and tagged SNPs for general cognitive function that have previously been identified at P < 9 × 10-6 in GWAS of diseases and traits listed in the GWAS catalog 2017-08-22 (www.ebi.ac.uk/gwas/).
Genomic Locus	Independent significant SNP	chr	bp	SNP reported in GWAS catalog	Date added to catalog	PMID	First Author	Date	Journal	Link	Study	Trait	InitialN	ReplicationN	Region	ReportedGene	MappedGene	Entrez Gene ID for nearest upstream gene to rs number, if not within gene	Entrez Gene ID for nearest downstream gene to rs number, if not within gene	Entrez Gene ID, if rs number within gene; multiple genes denotes overlapping transcripts	Distance in kb for nearest upstream gene to rs number, if not within gene	Distance in kb for nearest downstream gene to rs number, if not within gene	SNP(s) most strongly associated with trait and risk allele	SNP functional class	intergenic (0=no, 1=yes)	Reported risk/effect allele frequency associated with strongest SNP in controls	Reported p-value for strongest SNP risk allele	Comments about p-value	Or or Beta	95CI	Platform	CNV
4	rs1343775	1	41773502	rs12744310	2017-07-18	28530673	Sniekers S	2017-05-22	Nat Genet	www.ncbi.nlm.nih.gov/pubmed/28530673	Genome-wide association meta-analysis of 78,308 individuals identifies new loci and genes influencing human intelligence.	Intelligence	up to 58,799 European ancestry adults, up to 19,509 European ancestry children	NA	1p34.2	SCMH1, FOXO6	RPL36AP9 - FOXO6	100271139	100132074		42951	54101	rs12744310-T	regulatory_region_variant	1	0.2227	1e-08	(Adults)	5.724	z score decrease	Affymetrix, Illumina [12104294] (imputed)	N
4	rs1343775	1	41773502	rs12744310	2017-07-18	28530673	Sniekers S	2017-05-22	Nat Genet	www.ncbi.nlm.nih.gov/pubmed/28530673	Genome-wide association meta-analysis of 78,308 individuals identifies new loci and genes influencing human intelligence.	Intelligence	up to 58,799 European ancestry adults, up to 19,509 European ancestry children	NA	1p34.2	SCMH1, FOXO6	RPL36AP9 - FOXO6	100271139	100132074		42951	54101	rs12744310-T	regulatory_region_variant	1	0.2227	4e-09		5.876	z score decrease	Affymetrix, Illumina [12104294] (imputed)	N
4	rs1343775	1	41830086	rs56044892	2017-02-24	27225129	Okbay A	2016-05-26	Nature	www.ncbi.nlm.nih.gov/pubmed/27225129	Genome-wide association study identifies 74 loci associated with educational attainment.	Educational attainment (years of education)	405,072 European ancestry individuals	NA	1p34.2	NR	FOXO6			100132074			rs56044892-T	intron_variant	0	0.2021	5e-09		0.0162449	NR unit decrease	Affymetrix, Illumina, Perlegen [~ 9300000] (imputed)	N
4	rs10218712	1	41832297	rs10218712	2016-07-23	26198764	Goes FS	2015-07-21	Am J Med Genet B Neuropsychiatr Genet	www.ncbi.nlm.nih.gov/pubmed/26198764	Genome-wide association study of schizophrenia in Ashkenazi Jews.	Schizophrenia	592 Ashkenazi Jewish ancestry cases, 505 Ashkenazi Jewish ancestry controls, 36,989 cases, 113,075 controls	NA	1p34.2	NR	FOXO6			100132074			rs10218712-T	intron_variant	0	NR	4e-06		1.06	[NR]	Illumina [7158791] (imputed)	N
5	rs11210871	1	44026656	rs12076635	2017-02-24	27225129	Okbay A	2016-05-26	Nature	www.ncbi.nlm.nih.gov/pubmed/27225129	Genome-wide association study identifies 74 loci associated with educational attainment.	Educational attainment (years of education)	405,072 European ancestry individuals	NA	1p34.2	NR	PTPRF			5792			rs12076635-C	intron_variant	0	0.7871	3e-11		0.0180239	NR unit increase	Affymetrix, Illumina, Perlegen [~ 9300000] (imputed)	N
5	rs11210871	1	44037685	rs3001723	2016-07-23	26198764	Goes FS	2015-07-21	Am J Med Genet B Neuropsychiatr Genet	www.ncbi.nlm.nih.gov/pubmed/26198764	Genome-wide association study of schizophrenia in Ashkenazi Jews.	Schizophrenia	592 Ashkenazi Jewish ancestry cases, 505 Ashkenazi Jewish ancestry controls, 36,989 cases, 113,075 controls	NA	1p34.2	NR	PTPRF			5792			rs3001723-A	intron_variant	0	NR	3e-09		1.07	[NR]	Illumina [7158791] (imputed)	N
5	rs11210871	1	44076019	rs11210887	2016-12-21	27046643	Davies G	2016-04-05	Mol Psychiatry	www.ncbi.nlm.nih.gov/pubmed/27046643	Genome-wide association study of cognitive functions and educational attainment in UK Biobank (N=112â€‰151).	Educational attainment	111,114 European ancestry individuals	NA	1p34.2	PTPRF	PTPRF			5792			rs11210887-?	intron_variant	0	NR	1e-08		0.0261903	[NR] unit increase	Affymetrix [~ 17300000] (imputed)	N
5	rs11210871	1	44100084	rs11210892	2015-04-16	25056061	Ripke S	2014-07-22	Nature	www.ncbi.nlm.nih.gov/pubmed/25056061	Biological insights from 108 schizophrenia-associated genetic loci.	Schizophrenia	32,405 European ancestry cases, 42,221 European ancestry controls, 1,235 European ancestry cases and 1,235 European ancestry controls from 1235 parent-offspring trios, 1,836 East Asian ancestry cases, 3,383 East Asian ancestry controls	1,513 European ancestry cases, 66,236 European ancestry controls	1p34.2	KDM4A, PTPRF	PTPRF - KDM4A	5792	9682		10741	15705	rs11210892-A	intergenic_variant	1	0.323	3e-10		1.07066	[1.05-1.09]	Affymetrix, Illumina [9005918] (imputed)	N
5	rs2819336	1	44117006	rs660899	2012-03-03	22322875	Kim SJ	2012-02-09	Circ J	www.ncbi.nlm.nih.gov/pubmed/22322875	Genetic association of short sleep duration with hypertension incidence--a 6-year follow-up in the Korean genome and epidemiology study.	Hypertension risk in short sleep duration	4,965 Korean ancestry individuals	NA	1p34.2	JMJD2A	KDM4A			9682			rs660899-?	intron_variant	0	NR	4e-06	SNP+sleep	7.22	[3.12-16.70]	Affymetrix [334750]	N
5	rs2819336	1	44121557	rs2274465	2015-04-23	25231870	Perry JR	2014-07-23	Nature	www.ncbi.nlm.nih.gov/pubmed/25231870	Parent-of-origin-specific allelic associations among 106 genomic loci for age at menarche.	Menarche (age at onset)	Up to 182,413 European ancestry females	NA	1p34.2	KDM4A, PTPRP	KDM4A			9682			rs2274465-C	intron_variant	0	0.66	2e-09		0.03	[0.02-0.04] unit increase	Affymetrix, Illumina [2441815] (imputed)	N
5	rs2819336	1	44188719	rs12410444	2017-02-24	27225129	Okbay A	2016-05-26	Nature	www.ncbi.nlm.nih.gov/pubmed/27225129	Genome-wide association study identifies 74 loci associated with educational attainment.	Educational attainment (years of education)	405,072 European ancestry individuals	NA	1p34.1	NR	LOC101929592, ST3GAL3			101929592, 6487			rs12410444-A	intron_variant	0	0.7	6e-13		0.0174559	NR unit decrease	Affymetrix, Illumina, Perlegen [~ 9300000] (imputed)	N
5	rs2906455	1	44371441	rs142328051	2017-02-24	27225129	Okbay A	2016-05-26	Nature	www.ncbi.nlm.nih.gov/pubmed/27225129	Genome-wide association study identifies 74 loci associated with educational attainment.	Educational attainment (years of education)	405,072 European ancestry individuals	NA	1p34.1	NR	ST3GAL3			6487			rs142328051-T	intron_variant	0	0.9082	4e-08		0.0216351	NR unit increase	Affymetrix, Illumina, Perlegen [~ 9300000] (imputed)	N
6	rs2420551	1	69369837	rs7551318	2016-01-27	25673413	Locke AE	2015-02-12	Nature	www.ncbi.nlm.nih.gov/pubmed/25673413	Genetic studies of body mass index yield new insights for obesity biology.	Body mass index	up to 104,666 European ancestry male individuals, up to 132,115 European ancestry female individuals, 370 African American male individuals, 517 African American female individuals, 512 Hispanic male individuals, 764 Hispanic female individuals	up to 48,274 European ancestry male individuals, up to 39,864 European ancestry female individuals, 2,441 African American or Afro-Caribbean male individuals, 6,314 African American or Afro-Caribbean female individuals, 919 Filipino male individuals, 828 Filipino female individuals, 205 Seychelles male individuals, 287 Seychelles female individuals, 2,964 South Asian ancestry male individuals, 65…	1p31.2	DEPDC1	LOC105378783			105378783			rs7551318-T	intergenic_variant	0	0.933	7e-07	(EA, men)	0.062	[0.038-0.087] kg/m2 increase	Affymetrix, Illumina [2550021]	N
7	rs34305371	1	72635996	rs12134600	2015-05-08	25201988	Rietveld CA	2014-09-08	Proc Natl Acad Sci U S A	www.ncbi.nlm.nih.gov/pubmed/25201988	Common genetic variants associated with cognitive performance identified using the proxy-phenotype method.	Educational attainment	106,736 European ancestry individuals	NA	1p31.1	intergenic	NEGR1			257194			rs12134600-A	intron_variant	0	0.116	6e-08		0.038	[NR] unit increase	Affymetrix, Illumina [NR] (imputed)	N
7	rs34305371	1	72733610	rs34305371	2017-02-24	27225129	Okbay A	2016-05-26	Nature	www.ncbi.nlm.nih.gov/pubmed/27225129	Genome-wide association study identifies 74 loci associated with educational attainment.	Educational attainment (years of education)	405,072 European ancestry individuals	NA	1p31.1	NR	NEGR1			257194			rs34305371-A	intron_variant	0	0.096	2e-20		0.03623	NR unit increase	Affymetrix, Illumina, Perlegen [~ 9300000] (imputed)	N
7	rs34305371	1	72733610	rs34305371	2017-02-25	27225129	Okbay A	2016-05-26	Nature	www.ncbi.nlm.nih.gov/pubmed/27225129	Genome-wide association study identifies 74 loci associated with educational attainment.	Educational attainment (college completion)	280,007 European ancestry individuals	NA	1p31.1	NR	NEGR1			257194			rs34305371-A	intron_variant	0	0.0945	4e-12		1.07589	[NR]	Affymetrix, Illumina, Perlegen [~ 9300000] (imputed)	N
7	rs11209943	1	72751185	rs3101336	2013-09-12	23563607	Berndt SI	2013-04-07	Nat Genet	www.ncbi.nlm.nih.gov/pubmed/23563607	Genome-wide meta-analysis identifies 11 new loci for anthropometric traits and provides insights into genetic architecture.	Obesity	93,015 European ancestry overweight individuals, 32,858 European ancestry class I obese individuals, 9,889 European ancestry class II obese individuals, 2,896 European ancestry class III obese individuals, up to 65,840 European ancestry controls	65,332 European ancestry overweight individuals, 22,373 European ancestry class I obese individuals, 5,476 European ancestry class II obese individuals, 1,162 European ancestry class III obese individuals, up to 39,294 European ancestry controls	1p31.1	NEGR1	LOC105378797			105378797			rs3101336-C	upstream_gene_variant	0	0.61	1e-13	(Obesity class II)	1.12	[NR]	Affymetrix, Illumina [~ 2800000] (imputed)	N
7	rs11209943	1	72751185	rs3101336	2013-10-24	23563609	Wheeler E	2013-04-07	Nat Genet	www.ncbi.nlm.nih.gov/pubmed/23563609	Genome-wide SNP and CNV analysis identifies common and low-frequency variants associated with severe early-onset obesity.	Obesity (early onset extreme)	1,509 European ancestry cases, 5,380 European ancestry controls	971 European ancestry cases, 1,990 European ancestry controls	1p31.1	NEGR1	LOC105378797			105378797			rs3101336-C	upstream_gene_variant	0	0.6	2e-08		1.21	[1.13-1.29]	Affymetrix [~ 2000000] (imputed)	N
7	rs11209943	1	72751185	rs3101336	2015-04-23	25231870	Perry JR	2014-07-23	Nature	www.ncbi.nlm.nih.gov/pubmed/25231870	Parent-of-origin-specific allelic associations among 106 genomic loci for age at menarche.	Menarche (age at onset)	Up to 182,413 European ancestry females	NA	1p31.1	NEGR1	LOC105378797			105378797			rs3101336-T	upstream_gene_variant	0	0.4	5e-13		0.04	[0.03-0.05] unit increase	Affymetrix, Illumina [2441815] (imputed)	N
7	rs11209943	1	72751185	rs3101336	2016-01-27	25673413	Locke AE	2015-02-12	Nature	www.ncbi.nlm.nih.gov/pubmed/25673413	Genetic studies of body mass index yield new insights for obesity biology.	Body mass index	up to 104,666 European ancestry male individuals, up to 132,115 European ancestry female individuals, 370 African American male individuals, 517 African American female individuals, 512 Hispanic male individuals, 764 Hispanic female individuals	up to 48,274 European ancestry male individuals, up to 39,864 European ancestry female individuals, 2,441 African American or Afro-Caribbean male individuals, 6,314 African American or Afro-Caribbean female individuals, 919 Filipino male individuals, 828 Filipino female individuals, 205 Seychelles male individuals, 287 Seychelles female individuals, 2,964 South Asian ancestry male individuals, 65…	1p31.1	NEGR1	LOC105378797			105378797			rs3101336-C	upstream_gene_variant	0	0.611	6e-26		0.032	[0.026-0.038] kg/m2 increase	Affymetrix, Illumina [2550021]	N
7	rs11209943	1	72751185	rs3101336	2016-01-27	25673413	Locke AE	2015-02-12	Nature	www.ncbi.nlm.nih.gov/pubmed/25673413	Genetic studies of body mass index yield new insights for obesity biology.	Body mass index	up to 104,666 European ancestry male individuals, up to 132,115 European ancestry female individuals, 370 African American male individuals, 517 African American female individuals, 512 Hispanic male individuals, 764 Hispanic female individuals	up to 48,274 European ancestry male individuals, up to 39,864 European ancestry female individuals, 2,441 African American or Afro-Caribbean male individuals, 6,314 African American or Afro-Caribbean female individuals, 919 Filipino male individuals, 828 Filipino female individuals, 205 Seychelles male individuals, 287 Seychelles female individuals, 2,964 South Asian ancestry male individuals, 65…	1p31.1	NEGR1	LOC105378797			105378797			rs3101336-C	upstream_gene_variant	0	0.611	9e-17	(EA, women)	0.033	[0.026-0.041] kg/m2 increase	Affymetrix, Illumina [2550021]	N
7	rs11209943	1	72751185	rs3101336	2016-01-27	25673413	Locke AE	2015-02-12	Nature	www.ncbi.nlm.nih.gov/pubmed/25673413	Genetic studies of body mass index yield new insights for obesity biology.	Body mass index	up to 104,666 European ancestry male individuals, up to 132,115 European ancestry female individuals, 370 African American male individuals, 517 African American female individuals, 512 Hispanic male individuals, 764 Hispanic female individuals	up to 48,274 European ancestry male individuals, up to 39,864 European ancestry female individuals, 2,441 African American or Afro-Caribbean male individuals, 6,314 African American or Afro-Caribbean female individuals, 919 Filipino male individuals, 828 Filipino female individuals, 205 Seychelles male individuals, 287 Seychelles female individuals, 2,964 South Asian ancestry male individuals, 65…	1p31.1	NEGR1	LOC105378797			105378797			rs3101336-C	upstream_gene_variant	0	0.613	3e-26	(EA)	0.033	[0.027-0.039] kg/m2 increase	Affymetrix, Illumina [2550021]	N
7	rs11209943	1	72751185	rs3101336	2016-01-27	25673413	Locke AE	2015-02-12	Nature	www.ncbi.nlm.nih.gov/pubmed/25673413	Genetic studies of body mass index yield new insights for obesity biology.	Body mass index	up to 104,666 European ancestry male individuals, up to 132,115 European ancestry female individuals, 370 African American male individuals, 517 African American female individuals, 512 Hispanic male individuals, 764 Hispanic female individuals	up to 48,274 European ancestry male individuals, up to 39,864 European ancestry female individuals, 2,441 African American or Afro-Caribbean male individuals, 6,314 African American or Afro-Caribbean female individuals, 919 Filipino male individuals, 828 Filipino female individuals, 205 Seychelles male individuals, 287 Seychelles female individuals, 2,964 South Asian ancestry male individuals, 65…	1p31.1	NEGR1	LOC105378797			105378797			rs3101336-C	upstream_gene_variant	0	0.614	2e-16	(EA, men)	0.035	[0.026-0.043] kg/m2 increase	Affymetrix, Illumina [2550021]	N
7	rs11209943	1	72751185	rs3101336	2016-09-28	26604143	Felix JF	2015-11-24	Hum Mol Genet	www.ncbi.nlm.nih.gov/pubmed/26604143	Genome-wide association analysis identifies three new susceptibility loci for childhood body mass index.	Childhood body mass index	34,744 European ancestry children	11,313 European ancestry children	1p31.1	NR	LOC105378797			105378797			rs3101336-C	upstream_gene_variant	0	NR	4e-08				Affymetrix, Illumina [2499691] (imputed)	N
7	rs11209943	1	72751185	rs3101336	2017-08-10	28443625	Justice AE	2017-04-26	Nat Commun	www.ncbi.nlm.nih.gov/pubmed/28443625	Genome-wide meta-analysis of 241,258 adults accounting for smoking behaviour identifies novel loci for obesity traits.	BMI (adjusted for smoking behaviour)	98,173 European ancestry women, 64,373 European ancestry men, 5,829 European ancestry individuals, 10,500 African American/Afro-Caribbean ancestry women, 2,706 African American/Afro-Caribbean ancestry men, 1,030 Indian Asian ancestry women, 7,648 Indian Asian ancestry men, 1,793 Filipino ancestry women, 2,944 Hispanic/Latino ancestry women, 1,764 Hispanic/Latino ancestry men	21,496 European ancestry women, 24,385 European ancestry men, 118,364 European ancestry individuals, 2,326 African American/Afro-Caribbean ancestry women, 855 African American/Afro-Caribbean ancestry men	1p31.1	NEGR1	LOC105378797			105378797			rs3101336-T	upstream_gene_variant	0	0.3916	1e-15		0.0274	[0.021-0.034] kg/m2 decrease	Affymetrix, Illumina, Perlegen [up to 2800000] (imputed)	N
7	rs11209943	1	72751185	rs3101336	2017-08-10	28443625	Justice AE	2017-04-26	Nat Commun	www.ncbi.nlm.nih.gov/pubmed/28443625	Genome-wide meta-analysis of 241,258 adults accounting for smoking behaviour identifies novel loci for obesity traits.	BMI (adjusted for smoking behaviour)	98,173 European ancestry women, 64,373 European ancestry men, 5,829 European ancestry individuals, 10,500 African American/Afro-Caribbean ancestry women, 2,706 African American/Afro-Caribbean ancestry men, 1,030 Indian Asian ancestry women, 7,648 Indian Asian ancestry men, 1,793 Filipino ancestry women, 2,944 Hispanic/Latino ancestry women, 1,764 Hispanic/Latino ancestry men	21,496 European ancestry women, 24,385 European ancestry men, 118,364 European ancestry individuals, 2,326 African American/Afro-Caribbean ancestry women, 855 African American/Afro-Caribbean ancestry men	1p31.1	NEGR1	LOC105378797			105378797			rs3101336-T	upstream_gene_variant	0	0.3916	2e-12	(men)	0.0332	[0.024-0.042] kg/m2 decrease	Affymetrix, Illumina, Perlegen [up to 2800000] (imputed)	N
7	rs11209943	1	72751185	rs3101336	2017-08-10	28443625	Justice AE	2017-04-26	Nat Commun	www.ncbi.nlm.nih.gov/pubmed/28443625	Genome-wide meta-analysis of 241,258 adults accounting for smoking behaviour identifies novel loci for obesity traits.	BMI (adjusted for smoking behaviour)	98,173 European ancestry women, 64,373 European ancestry men, 5,829 European ancestry individuals, 10,500 African American/Afro-Caribbean ancestry women, 2,706 African American/Afro-Caribbean ancestry men, 1,030 Indian Asian ancestry women, 7,648 Indian Asian ancestry men, 1,793 Filipino ancestry women, 2,944 Hispanic/Latino ancestry women, 1,764 Hispanic/Latino ancestry men	21,496 European ancestry women, 24,385 European ancestry men, 118,364 European ancestry individuals, 2,326 African American/Afro-Caribbean ancestry women, 855 African American/Afro-Caribbean ancestry men	1p31.1	NEGR1	LOC105378797			105378797			rs3101336-T	upstream_gene_variant	0	0.3916	5e-07	(women)	0.023	[0.014-0.032] kg/m2 decrease	Affymetrix, Illumina, Perlegen [up to 2800000] (imputed)	N
7	rs11209943	1	72751185	rs3101336	2017-08-10	28443625	Justice AE	2017-04-26	Nat Commun	www.ncbi.nlm.nih.gov/pubmed/28443625	Genome-wide meta-analysis of 241,258 adults accounting for smoking behaviour identifies novel loci for obesity traits.	BMI in non-smokers	77,279 European ancestry women, 47,280 European ancestry men, 4,856 European ancestry individuals, 8,799 African American/Afro-Caribbean ancestry women, 1,803 African American/Afro-Caribbean ancestry men, 1,020 Indian Asian ancestry women, 6,691 Indian Asian ancestry men, 1,526 Filipino ancestry women, 2,469 Hispanic/Latino ancestry women, 1,318 Hispanic/Latino ancestry men	16,011 European ancestry women, 17,912 European ancestry men, 105,218 European ancestry individuals, 2,073 African American/Afro-Caribbean ancestry women, 647 African American/Afro-Caribbean ancestry men	1p31.1	NEGR1	LOC105378797			105378797			rs3101336-T	upstream_gene_variant	0	0.3916	2e-10		0.0251	[0.017-0.033] kg/m2 decrease	Affymetrix, Illumina, Perlegen [up to 2800000] (imputed)	N
7	rs11209943	1	72751185	rs3101336	2017-08-10	28443625	Justice AE	2017-04-26	Nat Commun	www.ncbi.nlm.nih.gov/pubmed/28443625	Genome-wide meta-analysis of 241,258 adults accounting for smoking behaviour identifies novel loci for obesity traits.	BMI in non-smokers	77,279 European ancestry women, 47,280 European ancestry men, 4,856 European ancestry individuals, 8,799 African American/Afro-Caribbean ancestry women, 1,803 African American/Afro-Caribbean ancestry men, 1,020 Indian Asian ancestry women, 6,691 Indian Asian ancestry men, 1,526 Filipino ancestry women, 2,469 Hispanic/Latino ancestry women, 1,318 Hispanic/Latino ancestry men	16,011 European ancestry women, 17,912 European ancestry men, 105,218 European ancestry individuals, 2,073 African American/Afro-Caribbean ancestry women, 647 African American/Afro-Caribbean ancestry men	1p31.1	NEGR1	LOC105378797			105378797			rs3101336-T	upstream_gene_variant	0	0.3916	8e-09	(men)	0.0315	[0.021-0.042] kg/m2 decrease	Affymetrix, Illumina, Perlegen [up to 2800000] (imputed)	N
7	rs11209943	1	72751185	rs3101336	2017-08-10	28443625	Justice AE	2017-04-26	Nat Commun	www.ncbi.nlm.nih.gov/pubmed/28443625	Genome-wide meta-analysis of 241,258 adults accounting for smoking behaviour identifies novel loci for obesity traits.	BMI in smokers	19,883 European ancestry women, up to 16,928 European ancestry men, up to 973 European ancestry individuals, 1,701 African American/Afro-Caribbean ancestry women, 903 African American/Afro-Caribbean ancestry men, 10 Indian Asian ancestry women, 957 Indian Asian ancestry men, 267 Filipino ancestry women, 475 Hispanic/Latino ancestry women, 446 Hispanic/Latino ancestry men	5,485 European ancestry women, 6,471 European ancestry men, 13,416 European ancestry individuals, 253 African American/Afro-Caribbean ancestry women, 208 African American/Afro-Caribbean ancestry men	1p31.1	NEGR1	LOC105378797			105378797			rs3101336-T	upstream_gene_variant	0	0.3916	4e-08		0.0389	[0.025-0.053] kg/m2 decrease	Affymetrix, Illumina, Perlegen [up to 2800000] (imputed)	N
7	rs11209943	1	72751185	rs3101336	2017-08-10	28443625	Justice AE	2017-04-26	Nat Commun	www.ncbi.nlm.nih.gov/pubmed/28443625	Genome-wide meta-analysis of 241,258 adults accounting for smoking behaviour identifies novel loci for obesity traits.	Body mass index (joint analysis main effects and smoking interaction)	98,173 European ancestry women, 64,373 European ancestry men, 5,829 European ancestry individuals, 10,500 African American/Afro-Caribbean ancestry women, 2,706 African American/Afro-Caribbean ancestry men, 1,030 Indian Asian ancestry women, 7,648 Indian Asian ancestry men, 1,793 Filipino ancestry women, 2,944 Hispanic/Latino ancestry women, 1,764 Hispanic/Latino ancestry men	21,496 European ancestry women, 24,385 European ancestry men, 118,364 European ancestry individuals, 2,326 African American/Afro-Caribbean ancestry women, 855 African American/Afro-Caribbean ancestry men	1p31.1	NEGR1	LOC105378797			105378797			rs3101336-T	upstream_gene_variant	0	0.3916	3e-16				Affymetrix, Illumina, Perlegen [up to 2800000] (imputed)	N
7	rs11209943	1	72751185	rs3101336	2017-08-10	28443625	Justice AE	2017-04-26	Nat Commun	www.ncbi.nlm.nih.gov/pubmed/28443625	Genome-wide meta-analysis of 241,258 adults accounting for smoking behaviour identifies novel loci for obesity traits.	Body mass index (joint analysis main effects and smoking interaction)	98,173 European ancestry women, 64,373 European ancestry men, 5,829 European ancestry individuals, 10,500 African American/Afro-Caribbean ancestry women, 2,706 African American/Afro-Caribbean ancestry men, 1,030 Indian Asian ancestry women, 7,648 Indian Asian ancestry men, 1,793 Filipino ancestry women, 2,944 Hispanic/Latino ancestry women, 1,764 Hispanic/Latino ancestry men	21,496 European ancestry women, 24,385 European ancestry men, 118,364 European ancestry individuals, 2,326 African American/Afro-Caribbean ancestry women, 855 African American/Afro-Caribbean ancestry men	1p31.1	NEGR1	LOC105378797			105378797			rs3101336-T	upstream_gene_variant	0	0.3916	4e-07	(women)			Affymetrix, Illumina, Perlegen [up to 2800000] (imputed)	N
7	rs11209943	1	72751185	rs3101336	2017-08-10	28443625	Justice AE	2017-04-26	Nat Commun	www.ncbi.nlm.nih.gov/pubmed/28443625	Genome-wide meta-analysis of 241,258 adults accounting for smoking behaviour identifies novel loci for obesity traits.	Body mass index (joint analysis main effects and smoking interaction)	98,173 European ancestry women, 64,373 European ancestry men, 5,829 European ancestry individuals, 10,500 African American/Afro-Caribbean ancestry women, 2,706 African American/Afro-Caribbean ancestry men, 1,030 Indian Asian ancestry women, 7,648 Indian Asian ancestry men, 1,793 Filipino ancestry women, 2,944 Hispanic/Latino ancestry women, 1,764 Hispanic/Latino ancestry men	21,496 European ancestry women, 24,385 European ancestry men, 118,364 European ancestry individuals, 2,326 African American/Afro-Caribbean ancestry women, 855 African American/Afro-Caribbean ancestry men	1p31.1	NEGR1	LOC105378797			105378797			rs3101336-T	upstream_gene_variant	0	0.3916	8e-12	(men)			Affymetrix, Illumina, Perlegen [up to 2800000] (imputed)	N
7	rs11209943	1	72762169	rs2568955	2017-02-24	27225129	Okbay A	2016-05-26	Nature	www.ncbi.nlm.nih.gov/pubmed/27225129	Genome-wide association study identifies 74 loci associated with educational attainment.	Educational attainment (years of education)	405,072 European ancestry individuals	NA	1p31.1	NR	LOC105378797			105378797			rs2568955-T	upstream_gene_variant	0	0.2488	6e-10		0.0159594	NR unit decrease	Affymetrix, Illumina, Perlegen [~ 9300000] (imputed)	N
7	rs11209943	1	72765116	rs2568958	2009-01-15	19079260	Thorleifsson G	2008-12-14	Nat Genet	www.ncbi.nlm.nih.gov/pubmed/19079260	Genome-wide association yields new sequence variants at seven loci that associate with measures of obesity.	Body mass index	72,598 European ancestry individuals, 1,160 African American individuals	Up to 11,036 European ancestry individuals, 32,615 individuals	1p31.1	NEGR1	LOC105378797			105378797			rs2568958-A	upstream_gene_variant	0	0.58	1e-11		3.77	[2.67-4.87] % SD increase	Illumina [305846]	N
7	rs11209943	1	72765116	rs2568958	2009-01-15	19079260	Thorleifsson G	2008-12-14	Nat Genet	www.ncbi.nlm.nih.gov/pubmed/19079260	Genome-wide association yields new sequence variants at seven loci that associate with measures of obesity.	Weight	72,598 European ancestry individuals, 1,160 African American individuals	Up to 11,036 European ancestry individuals, 32,615 individuals	1p31.1	NEGR1	LOC105378797			105378797			rs2568958-A	upstream_gene_variant	0	0.58	2e-08		3.37	[2.19-4.55] percentage SD increase	Illumina [305846]	N
7	rs11209943	1	72765116	rs2568958	2013-09-12	23563607	Berndt SI	2013-04-07	Nat Genet	www.ncbi.nlm.nih.gov/pubmed/23563607	Genome-wide meta-analysis identifies 11 new loci for anthropometric traits and provides insights into genetic architecture.	Body mass index	7,962 European ancestry high body mass index individuals, 8,106 European ancestry low body mass index individuals	4,900 European ancestry high body mass index individuals, 4,891 European ancestry low body mass index individuals	1p31.1	NEGR1	LOC105378797			105378797			rs2568958-A	upstream_gene_variant	0	0.6	2e-14		1.16	[NR]	Affymetrix, Illumina [~ 2800000] (imputed)	N
7	rs11209943	1	72765116	rs2568958	2013-09-12	23563607	Berndt SI	2013-04-07	Nat Genet	www.ncbi.nlm.nih.gov/pubmed/23563607	Genome-wide meta-analysis identifies 11 new loci for anthropometric traits and provides insights into genetic architecture.	Obesity	93,015 European ancestry overweight individuals, 32,858 European ancestry class I obese individuals, 9,889 European ancestry class II obese individuals, 2,896 European ancestry class III obese individuals, up to 65,840 European ancestry controls	65,332 European ancestry overweight individuals, 22,373 European ancestry class I obese individuals, 5,476 European ancestry class II obese individuals, 1,162 European ancestry class III obese individuals, up to 39,294 European ancestry controls	1p31.1	NEGR1	LOC105378797			105378797			rs2568958-A	upstream_gene_variant	0	0.61	4e-16	(Overweight)	1.06	[NR]	Affymetrix, Illumina [~ 2800000] (imputed)	N
7	rs11209943	1	72812440	rs2815752	2009-01-12	19079261	Willer CJ	2008-12-14	Nat Genet	www.ncbi.nlm.nih.gov/pubmed/19079261	Six new loci associated with body mass index highlight a neuronal influence on body weight regulation.	Body mass index	32,387 European ancestry individuals	59,082 European ancestry individuals	1p31.1	NEGR1	LOC105378797			105378797			rs2815752-A	intergenic_variant	0	0.62	6e-08		0.1	[0.04-0.16] kg/m2 increase	Affymetrix, Illumina [2399588] (imputed)	N
7	rs11209943	1	72812440	rs2815752	2010-11-17	20935630	Speliotes EK	2010-10-10	Nat Genet	www.ncbi.nlm.nih.gov/pubmed/20935630	Association analyses of 249,796 individuals reveal 18 new loci associated with body mass index.	Body mass index	Up to 123,865 European ancestry individuals	Up to 125,931 European ancestry individuals	1p31.1	NEGR1	LOC105378797			105378797			rs2815752-A	intergenic_variant	0	0.61	2e-22		0.13	[0.09-0.17] kg/m2 increase	Affymetrix, Illumina, Perlegen [~ 2800000] (imputed)	N
7	rs11209943	1	72823713	rs990871	2012-08-17	22589738	Fox CS	2012-05-10	PLoS Genet	www.ncbi.nlm.nih.gov/pubmed/22589738	Genome-wide association for abdominal subcutaneous and visceral adipose reveals a novel locus for visceral fat in women.	Subcutaneous adipose tissue	5,560 European ancestry female individuals, 4,997 European ancestry male individuals	NA	1p31.1	NEGR1	LOC105378797			105378797			rs990871-T	intergenic_variant	0	0.61	4e-06	(men)			Affymetrix, Illumina [2500000] (imputed)	N
7	rs3101338	1	72828183	rs12144335	2017-02-25	27225129	Okbay A	2016-05-26	Nature	www.ncbi.nlm.nih.gov/pubmed/27225129	Genome-wide association study identifies 74 loci associated with educational attainment.	Educational attainment (college completion)	280,007 European ancestry individuals	NA	1p31.1	NR	LOC105378797			105378797			rs12144335-T	intergenic_variant	0	0.8166	4e-08		1.0427	[NR]	Affymetrix, Illumina, Perlegen [~ 9300000] (imputed)	N
7	rs11209943	1	72837239	rs7531118	2013-09-12	23563607	Berndt SI	2013-04-07	Nat Genet	www.ncbi.nlm.nih.gov/pubmed/23563607	Genome-wide meta-analysis identifies 11 new loci for anthropometric traits and provides insights into genetic architecture.	Obesity	93,015 European ancestry overweight individuals, 32,858 European ancestry class I obese individuals, 9,889 European ancestry class II obese individuals, 2,896 European ancestry class III obese individuals, up to 65,840 European ancestry controls	65,332 European ancestry overweight individuals, 22,373 European ancestry class I obese individuals, 5,476 European ancestry class II obese individuals, 1,162 European ancestry class III obese individuals, up to 39,294 European ancestry controls	1p31.1	NEGR1	LOC105378797			105378797			rs7531118-C	intergenic_variant	0	0.56	2e-17	(Obesity class I)	1.08	[NR]	Affymetrix, Illumina [~ 2800000] (imputed)	N
7	rs11209943	1	72837239	rs7531118	2017-05-23	25673412	Shungin D	2015-02-12	Nature	www.ncbi.nlm.nih.gov/pubmed/25673412	New genetic loci link adipose and insulin biology to body fat distribution.	Hip circumference	up to 56,910 European ancestry men, up to 86,570 European ancestry women	up to 36,570 European ancestry men, 30,172 European ancestry women, 915 Filipino ancestry men, 735 Filipino ancestry women, 2,351 African American/Afro-Caribbean ancestry men, 6,258 African American/Afro-Caribbean ancestry women, 2,285 South Asian ancestry men, 506 South Asian ancestry women, 195 Seychellois ancestry men, 266 Seychellois ancestry women	1p31.1	NEGR1	LOC105378797			105378797			rs7531118-T	intergenic_variant	0	0.4418	4e-11	(EA)	0.0241	[0.017-0.031] unit decrease	Affymetrix, Illumina, Perlegen [up to 2542447] (imputed)	N
7	rs11209943	1	72837239	rs7531118	2017-05-23	25673412	Shungin D	2015-02-12	Nature	www.ncbi.nlm.nih.gov/pubmed/25673412	New genetic loci link adipose and insulin biology to body fat distribution.	Hip circumference	up to 56,910 European ancestry men, up to 86,570 European ancestry women	up to 36,570 European ancestry men, 30,172 European ancestry women, 915 Filipino ancestry men, 735 Filipino ancestry women, 2,351 African American/Afro-Caribbean ancestry men, 6,258 African American/Afro-Caribbean ancestry women, 2,285 South Asian ancestry men, 506 South Asian ancestry women, 195 Seychellois ancestry men, 266 Seychellois ancestry women	1p31.1	NEGR1	LOC105378797			105378797			rs7531118-T	intergenic_variant	0	0.4418	6e-10	(EA,women)	0.0295	[0.02-0.039] unit decrease	Affymetrix, Illumina, Perlegen [up to 2542447] (imputed)	N
7	rs11209943	1	72837239	rs7531118	2017-05-23	25673412	Shungin D	2015-02-12	Nature	www.ncbi.nlm.nih.gov/pubmed/25673412	New genetic loci link adipose and insulin biology to body fat distribution.	Waist circumference	up to 56,910 European ancestry men, up to 86,570 European ancestry women	up to 36,570 European ancestry men, 30,172 European ancestry women, 915 Filipino ancestry men, 735 Filipino ancestry women, 2,351 African American/Afro-Caribbean ancestry men, 6,258 African American/Afro-Caribbean ancestry women, 2,285 South Asian ancestry men, 506 South Asian ancestry women, 195 Seychellois ancestry men, 266 Seychellois ancestry women	1p31.1	NEGR1	LOC105378797			105378797			rs7531118-T	intergenic_variant	0	0.4436	1e-14	(EA)	0.0268	[0.02-0.034] unit decrease	Affymetrix, Illumina, Perlegen [up to 2542447] (imputed)	N
7	rs11209943	1	72837239	rs7531118	2017-05-23	25673412	Shungin D	2015-02-12	Nature	www.ncbi.nlm.nih.gov/pubmed/25673412	New genetic loci link adipose and insulin biology to body fat distribution.	Waist circumference	up to 56,910 European ancestry men, up to 86,570 European ancestry women	up to 36,570 European ancestry men, 30,172 European ancestry women, 915 Filipino ancestry men, 735 Filipino ancestry women, 2,351 African American/Afro-Caribbean ancestry men, 6,258 African American/Afro-Caribbean ancestry women, 2,285 South Asian ancestry men, 506 South Asian ancestry women, 195 Seychellois ancestry men, 266 Seychellois ancestry women	1p31.1	NEGR1	LOC105378797			105378797			rs7531118-T	intergenic_variant	0	0.4436	1e-07	(EA, men)	0.0256	[0.016-0.035] unit decrease	Affymetrix, Illumina, Perlegen [up to 2542447] (imputed)	N
7	rs11209943	1	72837239	rs7531118	2017-05-23	25673412	Shungin D	2015-02-12	Nature	www.ncbi.nlm.nih.gov/pubmed/25673412	New genetic loci link adipose and insulin biology to body fat distribution.	Waist circumference	up to 56,910 European ancestry men, up to 86,570 European ancestry women	up to 36,570 European ancestry men, 30,172 European ancestry women, 915 Filipino ancestry men, 735 Filipino ancestry women, 2,351 African American/Afro-Caribbean ancestry men, 6,258 African American/Afro-Caribbean ancestry women, 2,285 South Asian ancestry men, 506 South Asian ancestry women, 195 Seychellois ancestry men, 266 Seychellois ancestry women	1p31.1	NEGR1	LOC105378797			105378797			rs7531118-T	intergenic_variant	0	0.4436	2e-10	(EA, women)	0.0287	[0.02-0.038] unit decrease	Affymetrix, Illumina, Perlegen [up to 2542447] (imputed)	N
7	rs11209943	1	72838406	rs10789336	2013-11-03	23669352	Graff M	2013-05-12	Hum Mol Genet	www.ncbi.nlm.nih.gov/pubmed/23669352	Genome-wide analysis of BMI in adolescents and young adults reveals additional insight into the effects of genetic loci over the life course.	Body mass index	Up to 13,627 European ancestry individuals	Up to 16,253 European ancestry individuals	1p31.1	NEGR1	LOC105378797			105378797			rs10789336-A	intergenic_variant	0	0.62	1e-06		0.042	[0.024-0.060] unit increase	Affymetrix, Illumina [557887] (imputed)	N
8	rs7534501	1	96202443	rs12134151	2017-02-24	27225129	Okbay A	2016-05-26	Nature	www.ncbi.nlm.nih.gov/pubmed/27225129	Genome-wide association study identifies 74 loci associated with educational attainment.	Educational attainment (years of education)	405,072 European ancestry individuals	NA	1p21.3	NR	LOC101928219			101928219			rs12134151-C	intron_variant	0	0.4982	1e-08		0.0126919	NR unit decrease	Affymetrix, Illumina, Perlegen [~ 9300000] (imputed)	N
9	rs516902	1	96712521	rs498154	2016-07-23	26198764	Goes FS	2015-07-21	Am J Med Genet B Neuropsychiatr Genet	www.ncbi.nlm.nih.gov/pubmed/26198764	Genome-wide association study of schizophrenia in Ashkenazi Jews.	Schizophrenia	592 Ashkenazi Jewish ancestry cases, 505 Ashkenazi Jewish ancestry controls, 36,989 cases, 113,075 controls	NA	1p21.3	NR	RNU1-130P - LOC101928241	106480192	101928241		20905	7104	rs498154-G	regulatory_region_variant	1	NR	9e-06		1.05263	[NR]	Illumina [7158791] (imputed)	N
10	rs407102	1	109891133	rs10127790	2017-07-06	28452372	Gorski M	2017-04-28	Sci Rep	www.ncbi.nlm.nih.gov/pubmed/28452372	1000 Genomes-based meta-analysis identifies 10 novel loci for kidney function.	Glomerular filtration rate (creatinine)	110,517 European ancestry individuals		1p13.3	SYPL2	SORT1			6272			rs10127790-T	intron_variant	0	NR	8e-09		0.0061	[0.0041-0.0081] unit increase	Affymetrix, Illumina [up to 10971307] (imputed)	N
10	rs407102	1	109999838	rs1933182	2010-05-05	20383146	Kottgen A	2010-04-11	Nat Genet	www.ncbi.nlm.nih.gov/pubmed/20383146	New loci associated with kidney function and chronic kidney disease.	Chronic kidney disease	Up to 67,093 European ancestry individuals	Up to 22,982 European ancestry individuals	1p13.3	AMIGO1, SORT1, ATXN7L2, SYPL2, CYB561D1, PSMA5	PSMA5 - SYPL2	5686	284612		30730	9262	rs1933182-A	intergenic_variant	1	0.3	1e-07	(eGFRcrea)	0.01	[0.006-0.010] unit decrease	Affymetrix, Illumina [~ 2500000] (imputed)	N
10	rs407102	1	110014170	rs12136063	2016-11-25	26831199	Pattaro C	2016-01-21	Nat Commun	www.ncbi.nlm.nih.gov/pubmed/26831199	Genetic associations at 53 loci highlight cell types and biological pathways relevant for kidney function.	Glomerular filtration rate (creatinine)	133,413 European ancestry individuals	42,166 European ancestry individuals, up to 16,471 African ancestry individuals, up to 42,296 Asian ancestry individuals	1p13.3	SYPL2	SYPL2			284612			rs12136063-A	intron_variant	0	0.7	5e-08	(EA)	0.0045	[0.0029-0.0061] unit increase	Affymetrix, Illumina [~ 2500000] (imputed)	N
10	rs10858096	1	110040680	rs2297797	2017-05-24	28093568	Trampush JW	2017-01-17	Mol Psychiatry	www.ncbi.nlm.nih.gov/pubmed/28093568	GWAS meta-analysis reveals novel loci and genetic correlates for general cognitive function: a report from the COGENT consortium.	Cognitive function	up to 35,298 European ancestry individuals	NA	1p13.3	CYB561D1	CYB561D1			284613			rs2297797-?	3_prime_UTR_variant	0	NR	8e-07		0.039	[0.023-0.055] unit decrease	Affymetrix, Illumina [8037763] (imputed)	N
11	rs112780312	1	153927052	rs10908557	2017-03-22	27798627	Barban N	2016-10-31	Nat Genet	www.ncbi.nlm.nih.gov/pubmed/27798627	Genome-wide analysis identifies 12 loci influencing human reproductive behavior.	Age at first birth	189,656 European ancestry women, 48,408 European ancestry men		1q21.3	CRTC2, CREB3L4, GATAD2B, SLC39A1, DENND4B	CRTC2			200186			rs10908557-C	intron_variant	0	0.695	3e-07	(men)	0.185	NR unit increase	Illumina [2400000] (imputed)	N
11	rs112780312	1	153927052	rs10908557	2017-03-22	27798627	Barban N	2016-10-31	Nat Genet	www.ncbi.nlm.nih.gov/pubmed/27798627	Genome-wide analysis identifies 12 loci influencing human reproductive behavior.	Age at first birth	189,656 European ancestry women, 48,408 European ancestry men		1q21.3	CRTC2, CREB3L4, GATAD2B, SLC39A1, DENND4B	CRTC2			200186			rs10908557-C	intron_variant	0	0.695	5e-06	(women)	0.076	NR unit increase	Illumina [2400000] (imputed)	N
11	rs112780312	1	153927052	rs10908557	2017-03-22	27798627	Barban N	2016-10-31	Nat Genet	www.ncbi.nlm.nih.gov/pubmed/27798627	Genome-wide analysis identifies 12 loci influencing human reproductive behavior.	Age at first birth	189,656 European ancestry women, 48,408 European ancestry men		1q21.3	CRTC2, CREB3L4, GATAD2B, SLC39A1, DENND4B	CRTC2			200186			rs10908557-C	intron_variant	0	0.695	6e-10		0.091	NR unit increase	Illumina [2400000] (imputed)	N
16	rs889956	2	57404834	rs889956	2015-05-08	25201988	Rietveld CA	2014-09-08	Proc Natl Acad Sci U S A	www.ncbi.nlm.nih.gov/pubmed/25201988	Common genetic variants associated with cognitive performance identified using the proxy-phenotype method.	Educational attainment	106,736 European ancestry individuals	NA	2p16.1	intergenic	EIF2S2P7 - LOC105377632	647016	105377632		128234	110318	rs889956-A	intergenic_variant	1	0.397	2e-07		0.023	[NR] unit decrease	Affymetrix, Illumina [NR] (imputed)	N
17	rs7599488	2	60718347	rs7599488	2016-07-23	26198764	Goes FS	2015-07-21	Am J Med Genet B Neuropsychiatr Genet	www.ncbi.nlm.nih.gov/pubmed/26198764	Genome-wide association study of schizophrenia in Ashkenazi Jews.	Schizophrenia	592 Ashkenazi Jewish ancestry cases, 505 Ashkenazi Jewish ancestry controls, 36,989 cases, 113,075 controls	NA	2p16.1	NR	BCL11A			53335			rs7599488-C	intron_variant	0	NR	6e-07		1.05263	[NR]	Illumina [7158791] (imputed)	N
18	rs59663815	2	68495002	rs2120335	2015-09-24	25282103	Wood AR	2014-10-05	Nat Genet	www.ncbi.nlm.nih.gov/pubmed/25282103	Defining the role of common variation in the genomic and biological architecture of adult human height.	Height	253,288 European ancestry individuals	80,067 European ancestry individuals	2p14	PPP3R1	LOC107985892			107985892			rs2120335-A	intergenic_variant	0	0.406	8e-10		0.019	[0.013-0.025] unit decrease	Affymetrix, Illumina, Perlegen [2550858] (imputed)	N
19	rs4852252	2	71572917	rs6746731	2017-07-18	28530673	Sniekers S	2017-05-22	Nat Genet	www.ncbi.nlm.nih.gov/pubmed/28530673	Genome-wide association meta-analysis of 78,308 individuals identifies new loci and genes influencing human intelligence.	Intelligence	up to 58,799 European ancestry adults, up to 19,509 European ancestry children	NA	2p13.2	ZNF638	ZNF638			27332			rs6746731-T	intron_variant	0	0.4287	4e-06	(Adults)	4.591	z score decrease	Affymetrix, Illumina [12104294] (imputed)	N
19	rs4852252	2	71572917	rs6746731	2017-07-18	28530673	Sniekers S	2017-05-22	Nat Genet	www.ncbi.nlm.nih.gov/pubmed/28530673	Genome-wide association meta-analysis of 78,308 individuals identifies new loci and genes influencing human intelligence.	Intelligence	up to 58,799 European ancestry adults, up to 19,509 European ancestry children	NA	2p13.2	ZNF638	ZNF638			27332			rs6746731-T	intron_variant	0	0.4287	5e-08		5.456	z score decrease	Affymetrix, Illumina [12104294] (imputed)	N
19	rs4852252	2	71584485	rs7568069	2015-09-24	25282103	Wood AR	2014-10-05	Nat Genet	www.ncbi.nlm.nih.gov/pubmed/25282103	Defining the role of common variation in the genomic and biological architecture of adult human height.	Height	253,288 European ancestry individuals	80,067 European ancestry individuals	2p13.2	ZNF638	ZNF638			27332			rs7568069-A	intron_variant	0	0.578	3e-13		0.022	[0.016-0.028] unit decrease	Affymetrix, Illumina, Perlegen [2550858] (imputed)	N
20	rs11126396	2	73623439	rs56145559	2016-07-23	26198764	Goes FS	2015-07-21	Am J Med Genet B Neuropsychiatr Genet	www.ncbi.nlm.nih.gov/pubmed/26198764	Genome-wide association study of schizophrenia in Ashkenazi Jews.	Schizophrenia	592 Ashkenazi Jewish ancestry cases, 505 Ashkenazi Jewish ancestry controls, 36,989 cases, 113,075 controls	NA	2p13.1	NR	ALMS1			7840			rs56145559-T	intron_variant	0	NR	1e-07		1.07	[NR]	Illumina [7158791] (imputed)	N
20	rs11126396	2	73679280	rs6546838	2016-11-25	26831199	Pattaro C	2016-01-21	Nat Commun	www.ncbi.nlm.nih.gov/pubmed/26831199	Genetic associations at 53 loci highlight cell types and biological pathways relevant for kidney function.	Glomerular filtration rate (creatinine)	133,413 European ancestry individuals	42,166 European ancestry individuals, up to 16,471 African ancestry individuals, up to 42,296 Asian ancestry individuals	2p13.1	ALMS1	ALMS1			7840			rs6546838-A	missense_variant	0	0.76	8e-20	(EA)	0.0093	[0.0073-0.0113] unit decrease	Affymetrix, Illumina [~ 2500000] (imputed)	N
20	rs11126396	2	73743982	rs9309473	2012-02-10	21931564	Nicholson G	2011-09-08	PLoS Genet	www.ncbi.nlm.nih.gov/pubmed/21931564	A genome-wide metabolic QTL analysis in Europeans implicates two loci shaped by recent positive selection.	Metabolite levels	142 European ancestry female twins	202 European ancestry individuals	2p13.1	NAT8, TPRKB, DUSP11, ALMS1	ALMS1			7840			rs9309473-G	intron_variant	0	NR	1e-11	(N-ACu)	1.1	[0.85-1.35] unit increase	Illumina [2541644] (imputed)	N
20	rs11126396	2	73767897	rs4500972	2017-07-06	28452372	Gorski M	2017-04-28	Sci Rep	www.ncbi.nlm.nih.gov/pubmed/28452372	1000 Genomes-based meta-analysis identifies 10 novel loci for kidney function.	Glomerular filtration rate (creatinine)	110,517 European ancestry individuals		2p13.1	NAT8	ALMS1			7840			rs4500972-A	intron_variant	0	NR	3e-18		0.0108	[0.0084-0.0132] unit increase	Affymetrix, Illumina [up to 10971307] (imputed)	N
20	rs11126396	2	73785358	rs6546847	2014-10-28	24586186	Rueedi R	2014-02-20	PLoS Genet	www.ncbi.nlm.nih.gov/pubmed/24586186	Genome-wide association study of metabolic traits reveals novel gene-metabolite-disease links.	Urinary metabolites (H-NMR features)	835 European ancestry individuals	601 Brazilian individuals	2p13.1	ALMS1	ALMS1			7840			rs6546847-A	intron_variant	0	0.22	1e-17	(2.7875, N-Acetylated compunds)	0.34	[NR] unit increase	Illumina [713870] (imputed)	N
20	rs11126396	2	73785358	rs6546847	2014-10-28	24586186	Rueedi R	2014-02-20	PLoS Genet	www.ncbi.nlm.nih.gov/pubmed/24586186	Genome-wide association study of metabolic traits reveals novel gene-metabolite-disease links.	Urinary metabolites (H-NMR features)	835 European ancestry individuals	601 Brazilian individuals	2p13.1	ALMS1	ALMS1			7840			rs6546847-A	intron_variant	0	0.22	5e-161	(2.0375, N-Acetylated compunds)	0.91	[NR] unit increase	Illumina [713870] (imputed)	N
21	rs2685200	2	82094566	rs6715448	2017-06-29	28360221	BÃ¶ger CA	2017-03-30	J Am Soc Nephrol	www.ncbi.nlm.nih.gov/pubmed/28360221	NFAT5 and SLC4A10 Loci Associate with Plasma Osmolality.	Blood osmolality (transformed sodium)	45,889 European ancestry individuals, up to 8,765 Asian Indian ancestry individuals, up to 7,215 African ancestry individuals	17,637 European ancestry individuals	2p12	NR	LOC102724542 - LOC105374829	102724542	105374829		16799	1325	rs6715448-T	intergenic_variant	1	0.29	3e-06	(AA)	0.1	[0.061-0.139] unit decrease	Affymetrix, Illumina, Perlegen [~ 2500000] (imputed)	N
22	rs2309812	2	100807725	rs2309757	2017-02-25	27225129	Okbay A	2016-05-26	Nature	www.ncbi.nlm.nih.gov/pubmed/27225129	Genome-wide association study identifies 74 loci associated with educational attainment.	Educational attainment (college completion)	280,007 European ancestry individuals	NA	2q11.2	NR	AFF3 - LINC01104	3899	150577		48680	16991	rs2309757-?	intergenic_variant	1	0.3869	4e-19		1.05561	[NR]	Affymetrix, Illumina, Perlegen [~ 9300000] (imputed)	N
22	rs2309812	2	100818479	rs4851266	2013-11-29	23722424	Rietveld CA	2013-05-30	Science	www.ncbi.nlm.nih.gov/pubmed/23722424	GWAS of 126,559 individuals identifies genetic variants associated with educational attainment.	Educational attainment	up to 101,069 European ancestry individuals	25,490 European ancestry individuals	2q11.2	LOC150577	AFF3 - LINC01104	3899	150577		59434	6237	rs4851266-T	intergenic_variant	1	0.396	5e-11	(College)	1.05	[NR]	Affymetrix, Illumina, Perlegen [up to 2309290] (imputed)	N
22	rs2309812	2	100821548	rs12987662	2017-02-24	27225129	Okbay A	2016-05-26	Nature	www.ncbi.nlm.nih.gov/pubmed/27225129	Genome-wide association study identifies 74 loci associated with educational attainment.	Educational attainment (years of education)	405,072 European ancestry individuals	NA	2q11.2	NR	AFF3 - LINC01104	3899	150577		62503	3168	rs12987662-A	upstream_gene_variant	1	0.3934	9e-28		0.0249144	NR unit increase	Affymetrix, Illumina, Perlegen [~ 9300000] (imputed)	N
22	rs2309812	2	100852734	rs13010010	2017-07-18	28530673	Sniekers S	2017-05-22	Nat Genet	www.ncbi.nlm.nih.gov/pubmed/28530673	Genome-wide association meta-analysis of 78,308 individuals identifies new loci and genes influencing human intelligence.	Intelligence	up to 58,799 European ancestry adults, up to 19,509 European ancestry children	NA	2q11.2	LINC01104, AFF3	LINC01104			150577			rs13010010-T	intron_variant	0	0.3782	8e-07	(Adults)	4.948	z score increase	Affymetrix, Illumina [12104294] (imputed)	N
22	rs2309812	2	100852734	rs13010010	2017-07-18	28530673	Sniekers S	2017-05-22	Nat Genet	www.ncbi.nlm.nih.gov/pubmed/28530673	Genome-wide association meta-analysis of 78,308 individuals identifies new loci and genes influencing human intelligence.	Intelligence	up to 58,799 European ancestry adults, up to 19,509 European ancestry children	NA	2q11.2	LINC01104, AFF	LINC01104			150577			rs13010010-T	intron_variant	0	0.3782	2e-08		5.654	z score increase	Affymetrix, Illumina [12104294] (imputed)	N
22	rs71413877	2	100924822	rs71413877	2017-02-24	27225129	Okbay A	2016-05-26	Nature	www.ncbi.nlm.nih.gov/pubmed/27225129	Genome-wide association study identifies 74 loci associated with educational attainment.	Educational attainment (years of education)	405,072 European ancestry individuals	NA	2q11.2	NR	LONRF2			164832			rs71413877-A	intron_variant	0	0.0438	2e-09		0.0347082	NR unit increase	Affymetrix, Illumina, Perlegen [~ 9300000] (imputed)	N
24	rs13428598	2	144152539	rs17824247	2017-02-24	27225129	Okbay A	2016-05-26	Nature	www.ncbi.nlm.nih.gov/pubmed/27225129	Genome-wide association study identifies 74 loci associated with educational attainment.	Educational attainment (years of education)	405,072 European ancestry individuals	NA	2q22.2	NR	ARHGAP15			55843			rs17824247-T	intron_variant	0	0.5924	2e-12		0.0158471	NR unit decrease	Affymetrix, Illumina, Perlegen [~ 9300000] (imputed)	N
24	rs13428598	2	144261657	rs35125029	2016-12-08	26835600	Hu Y	2016-02-02	Nat Commun	www.ncbi.nlm.nih.gov/pubmed/26835600	GWAS of 89,283 individuals identifies genetic variants associated with self-reporting of being a morning person.	Morning vs. evening chronotype	38,937 European ancestry morning chronotype individuals, 50,346 European ancestry evening chronotype individuals	NA	2q22.3	NR	ARHGAP15			55843			rs35125029-?	intron_variant	0	NR	3e-07				Illumina [7427422] (imputed)	N
24	rs13428598	2	144263280	rs10191758	2017-07-18	28530673	Sniekers S	2017-05-22	Nat Genet	www.ncbi.nlm.nih.gov/pubmed/28530673	Genome-wide association meta-analysis of 78,308 individuals identifies new loci and genes influencing human intelligence.	Intelligence	up to 58,799 European ancestry adults, up to 19,509 European ancestry children	NA	2q22.3	ARHGAP15	ARHGAP15			55843			rs10191758-A	intron_variant	0	0.6065	3e-09		5.929	z score decrease	Affymetrix, Illumina [12104294] (imputed)	N
24	rs13428598	2	144263280	rs10191758	2017-07-18	28530673	Sniekers S	2017-05-22	Nat Genet	www.ncbi.nlm.nih.gov/pubmed/28530673	Genome-wide association meta-analysis of 78,308 individuals identifies new loci and genes influencing human intelligence.	Intelligence	up to 58,799 European ancestry adults, up to 19,509 European ancestry children	NA	2q22.3	ARHGAP15	ARHGAP15			55843			rs10191758-A	intron_variant	0	0.6065	3e-09	(Adults)	5.929	z score decrease	Affymetrix, Illumina [12104294] (imputed)	N
27	rs62194185	2	161920884	rs16845580	2017-02-24	27225129	Okbay A	2016-05-26	Nature	www.ncbi.nlm.nih.gov/pubmed/27225129	Genome-wide association study identifies 74 loci associated with educational attainment.	Educational attainment (years of education)	405,072 European ancestry individuals	NA	2q24.2	NR	LOC100131736 - LOC105373719	100131736	105373719		13831	3400	rs16845580-T	intergenic_variant	1	0.6283	4e-12		0.015939	NR unit increase	Affymetrix, Illumina, Perlegen [~ 9300000] (imputed)	N
27	rs11884495	2	162092640	rs7309	2013-12-01	23722424	Rietveld CA	2013-05-30	Science	www.ncbi.nlm.nih.gov/pubmed/23722424	GWAS of 126,559 individuals identifies genetic variants associated with educational attainment.	Educational attainment	up to 126,559 European ancestry individuals	NA	2q24.2	TANK	LOC101929512, TANK			101929512, 10010			rs7309-A	3_prime_UTR_variant	0	0.476	4e-08	(Edu Years)	0.088	[NR] unit decrease	Affymetrix, Illumina, Perlegen [up to 23218963] (imputed)	N
27	rs11884495	2	162092640	rs7309	2015-05-08	25201988	Rietveld CA	2014-09-08	Proc Natl Acad Sci U S A	www.ncbi.nlm.nih.gov/pubmed/25201988	Common genetic variants associated with cognitive performance identified using the proxy-phenotype method.	Educational attainment	106,736 European ancestry individuals	NA	2q24.2	TANK, PSMD14, TBR1	LOC101929512, TANK			101929512, 10010			rs7309-A	3_prime_UTR_variant	0	0.491	2e-07		0.022	[NR] unit decrease	Affymetrix, Illumina [NR] (imputed)	N
28	rs4500960	2	162818621	rs4500960	2017-02-24	27225129	Okbay A	2016-05-26	Nature	www.ncbi.nlm.nih.gov/pubmed/27225129	Genome-wide association study identifies 74 loci associated with educational attainment.	Educational attainment (years of education)	405,072 European ancestry individuals	NA	2q24.2	NR	SLC4A10			57282			rs4500960-T	intron_variant	0	0.463	3e-10		0.0140885	NR unit decrease	Affymetrix, Illumina, Perlegen [~ 9300000] (imputed)	N
28	rs4500960	2	162831756	rs4295021	2015-12-18	25742292	Aschebrook-Kilfoy B	2015-03-05	PLoS One	www.ncbi.nlm.nih.gov/pubmed/25742292	Genome-wide association study of parity in bangladeshi women.	Number of children	1,686 Bangladeshi women	NA	2q24.2	NR	SLC4A10			57282			rs4295021-?	intron_variant	0		7e-06		0.28	unit increase	Illumina [1211988] (imputed)	N
28	rs4500960	2	162831756	rs4295021	2015-12-18	25742292	Aschebrook-Kilfoy B	2015-03-05	PLoS One	www.ncbi.nlm.nih.gov/pubmed/25742292	Genome-wide association study of parity in bangladeshi women.	Number of pregnancies	1,686 Bangladeshi women	NA	2q24.2	NR	SLC4A10			57282			rs4295021-?	intron_variant	0		3e-06		0.27	unit increase	Illumina [1211988] (imputed)	N
28	rs4500960	2	162845855	rs2909457	2015-04-16	25056061	Ripke S	2014-07-22	Nature	www.ncbi.nlm.nih.gov/pubmed/25056061	Biological insights from 108 schizophrenia-associated genetic loci.	Schizophrenia	32,405 European ancestry cases, 42,221 European ancestry controls, 1,235 European ancestry cases and 1,235 European ancestry controls from 1235 parent-offspring trios, 1,836 East Asian ancestry cases, 3,383 East Asian ancestry controls	1,513 European ancestry cases, 66,236 European ancestry controls	2q24.2	DPP4, SLC4A10	SLC4A10 - DPP4	57282	1803		4069	2896	rs2909457-G	downstream_gene_variant	1	0.407	5e-08		1.05932	[1.04-1.08]	Affymetrix, Illumina [9005918] (imputed)	N
28	rs4500960	2	162845855	rs2909457	2016-07-23	26198764	Goes FS	2015-07-21	Am J Med Genet B Neuropsychiatr Genet	www.ncbi.nlm.nih.gov/pubmed/26198764	Genome-wide association study of schizophrenia in Ashkenazi Jews.	Schizophrenia	592 Ashkenazi Jewish ancestry cases, 505 Ashkenazi Jewish ancestry controls, 36,989 cases, 113,075 controls	NA	2q24.2	NR	SLC4A10 - DPP4	57282	1803		4069	2896	rs2909457-G	downstream_gene_variant	1	NR	6e-08		1.06383	[NR]	Illumina [7158791] (imputed)	N
28	rs2284871	2	162851147	rs12617656	2014-11-14	24782177	Jiang L	2014-05-01	Arthritis Rheumatol	www.ncbi.nlm.nih.gov/pubmed/24782177	Novel risk loci for rheumatoid arthritis in Han Chinese and congruence with risk variants in Europeans.	Rheumatoid arthritis	433 Han Chinese ancestry ACPA positive cases, 519 Han Chinese ancestry ACPA negative cases, 943 Han Chinese ancestry controls	1,032 Han Chinese ancestry ACPA positive cases, 1,100 Han Chinese ancestry ACPA negative cases, 2,553 Han Chinese ancestry controls	2q24.2	DPP4	DPP4			1803			rs12617656-T	intron_variant	0	0.338	1e-08	(all cases vs. all controls)	1.243	[NR]	Affymetrix [3441843] (imputed)	N
28	rs2284871	2	162851147	rs12617656	2014-11-14	24782177	Jiang L	2014-05-01	Arthritis Rheumatol	www.ncbi.nlm.nih.gov/pubmed/24782177	Novel risk loci for rheumatoid arthritis in Han Chinese and congruence with risk variants in Europeans.	Rheumatoid arthritis	433 Han Chinese ancestry ACPA positive cases, 519 Han Chinese ancestry ACPA negative cases, 943 Han Chinese ancestry controls	1,032 Han Chinese ancestry ACPA positive cases, 1,100 Han Chinese ancestry ACPA negative cases, 2,553 Han Chinese ancestry controls	2q24.2	DPP4	DPP4			1803			rs12617656-T	intron_variant	0	0.338	2e-21	(ACPA+ cases vs. all controls)	1.557	[NR]	Affymetrix [3441843] (imputed)	N
28	rs2284871	2	162867613	rs10166311	2015-05-08	25201988	Rietveld CA	2014-09-08	Proc Natl Acad Sci U S A	www.ncbi.nlm.nih.gov/pubmed/25201988	Common genetic variants associated with cognitive performance identified using the proxy-phenotype method.	Educational attainment	106,736 European ancestry individuals	NA	2q24.2	intergenic	DPP4			1803			rs10166311-A	intron_variant	0	0.326	1e-06		0.023	[NR] unit increase	Affymetrix, Illumina [NR] (imputed)	N
28	rs6741949	2	162910223	rs6741949	2012-06-02	22504421	Bis JC	2012-04-15	Nat Genet	www.ncbi.nlm.nih.gov/pubmed/22504421	Common variants at 12q14 and 12q24 are associated with hippocampal volume.	Hippocampal volume	9,232 European ancestry individuals	2,318 European ancestry individuals	2q24.2	DPP4	DPP4			1803			rs6741949-G	intron_variant	0	0.53	3e-07		52.8	[32.61-72.99] mm3 decrease	Affymetrix, Illumina [~ 2500000] (imputed)	N
30	rs954734	3	24079291	rs7646501	2017-07-18	28530673	Sniekers S	2017-05-22	Nat Genet	www.ncbi.nlm.nih.gov/pubmed/28530673	Genome-wide association meta-analysis of 78,308 individuals identifies new loci and genes influencing human intelligence.	Intelligence	up to 58,799 European ancestry adults, up to 19,509 European ancestry children	NA	3p24.2	NR1D2, LINC00691	NR1D2 - NPM1P23	9975	100422256		57182	58817	rs7646501-A	intergenic_variant	1	0.7411	2e-08	(Adults)	5.634	z score increase	Affymetrix, Illumina [12104294] (imputed)	N
30	rs954734	3	24079291	rs7646501	2017-07-18	28530673	Sniekers S	2017-05-22	Nat Genet	www.ncbi.nlm.nih.gov/pubmed/28530673	Genome-wide association meta-analysis of 78,308 individuals identifies new loci and genes influencing human intelligence.	Intelligence	up to 58,799 European ancestry adults, up to 19,509 European ancestry children	NA	3p24.2	NR1D2, LINC00691	NR1D2 - NPM1P23	9975	100422256		57182	58817	rs7646501-A	intergenic_variant	1	0.7411	2e-09		6.016	z score increase	Affymetrix, Illumina [12104294] (imputed)	N
32	rs28657585	3	48661985	rs13063312	2017-07-18	28240269	Suhre K	2017-02-27	Nat Commun	www.ncbi.nlm.nih.gov/pubmed/28240269	Connecting genetic risk to disease end points through the human blood plasma proteome.	Blood protein levels	997 European ancestry individuals	338 Arab, South Asian and Filipino ancestry individuals	3p21.31	IP6K2, SLC26A6, NCKIPSD, CELSR3, TMEM89, MIR6824, MIR4793, CELSR3-AS1, RP11-572O6.1, AC141002.1	TMEM89 - SLC26A6	440955	65010		2796	1171	rs13063312-A	upstream_gene_variant	1	0.104814	4e-30	(EA, Hepatocyte growth factor-like protein)	0.7897	[0.66-0.92] unit decrease	Affymetrix [509946]	N
32	rs28657585	3	48681053	rs9868809	2016-07-24	26192919	Liu JZ	2015-07-20	Nat Genet	www.ncbi.nlm.nih.gov/pubmed/26192919	Association analyses identify 38 susceptibility loci for inflammatory bowel disease and highlight shared genetic risk across populations.	Crohn's disease	5,956 European ancestry cases, 14,927 European ancestry controls	14,594 European ancestry cases, 26,715 European ancestry controls, 151 Iranian ancestry cases, 342 Iranian ancestry controls, 184 Indian ancestry cases, 990 Indian ancestry controls, 1,690 East Asian ancestry cases, 3,719 East Asian ancestry controls	3p21.31	NR	CELSR3			1951			rs9868809-A	synonymous_variant	0	0.1036	1e-09	(EA)	1.12409	[1.09-1.16]	Affymetrix, Illumina [~ 9000000] (imputed)	N
32	rs28657585	3	48681053	rs9868809	2016-07-24	26192919	Liu JZ	2015-07-20	Nat Genet	www.ncbi.nlm.nih.gov/pubmed/26192919	Association analyses identify 38 susceptibility loci for inflammatory bowel disease and highlight shared genetic risk across populations.	Inflammatory bowel disease	12,882 European ancestry cases, 21,770 European ancestry controls	25,273 European ancestry cases, 26,715 European ancestry controls, 548 Iranian ancestry cases, 342 Iranian ancestry control, 1,423 Indian ancestry cases, 990 Indian ancestry controls, 2,824 East Asian ancestry cases, 3,719 East Asian ancestry controls	3p21.31	NR	CELSR3			1951			rs9868809-A	synonymous_variant	0	0.1036	8e-18	(EA)	1.14707	[1.12-1.18]	Affymetrix, Illumina [~ 9000000] (imputed)	N
32	rs28657585	3	48681053	rs9868809	2016-07-24	26192919	Liu JZ	2015-07-20	Nat Genet	www.ncbi.nlm.nih.gov/pubmed/26192919	Association analyses identify 38 susceptibility loci for inflammatory bowel disease and highlight shared genetic risk across populations.	Ulcerative colitis	6,968 European ancestry cases, 20,464 European ancestry controls	10,679 European ancestry cases, 26,715 European ancestry controls, 397 Iranian ancestry cases, 342 Iranian ancestry controls, 1,239 Indian ancestry cases, 990 Indian ancestry controls, 1,134 East Asian ancestry cases, 3,719 East Asian ancestry controls	3p21.31	NR	CELSR3			1951			rs9868809-A	synonymous_variant	0	0.1036	3e-13	(EA)	1.15702	[1.12-1.2]	Affymetrix, Illumina [~ 9000000] (imputed)	N
32	rs28657585	3	48682658	rs34638686	2017-02-24	27225129	Okbay A	2016-05-26	Nature	www.ncbi.nlm.nih.gov/pubmed/27225129	Genome-wide association study identifies 74 loci associated with educational attainment.	Educational attainment (years of education)	405,072 European ancestry individuals	NA	3p21.31	NR	CELSR3			1951			rs34638686-T	intron_variant	0	0.1009	2e-09		0.0229113	NR unit increase	Affymetrix, Illumina, Perlegen [~ 9300000] (imputed)	N
32	rs111599092	3	48731487	rs3172494	2017-02-24	27225129	Okbay A	2016-05-26	Nature	www.ncbi.nlm.nih.gov/pubmed/27225129	Genome-wide association study identifies 74 loci associated with educational attainment.	Educational attainment (years of education)	405,072 European ancestry individuals	NA	3p21.31	NR	IP6K2			51447			rs3172494-T	3_prime_UTR_variant	0	0.1168	9e-11		0.0231412	NR unit increase	Affymetrix, Illumina, Perlegen [~ 9300000] (imputed)	N
32	rs28657585	3	48735706	rs11719291	2015-11-08	25644384	Davies G	2015-02-03	Mol Psychiatry	www.ncbi.nlm.nih.gov/pubmed/25644384	Genetic contributions to variation in general cognitive function: a meta-analysis of genome-wide association studies in the CHARGE consortium (N=53â€‰949).	Cognitive function	51,719 European ancestry individuals 1,473 Erasmus Rupchen (founder/genetic isolate) individuals, 327 Korculan (founder/genetic isolate) individuals, 430 Orcadian (founder/genetic isolate) individuals	NA	3p21.31	IP6K2	IP6K2			51447			rs11719291-?	intron_variant	0	NR	3e-06		0.04	[0.023-0.057] unit decrease	Affymetrix, Illumina [2478500] (imputed)	N
32	rs28657585	3	48770732	rs11715835	2017-07-18	28240269	Suhre K	2017-02-27	Nat Commun	www.ncbi.nlm.nih.gov/pubmed/28240269	Connecting genetic risk to disease end points through the human blood plasma proteome.	Blood protein levels	997 European ancestry individuals	338 Arab, South Asian and Filipino ancestry individuals	3p21.31	IP6K2, CELSR3, NCKIPSD, ARIH2, WDR6, KLHDC8B, CCDC36, USP19, PRKAR2A, P4HTM, DALRD3, IMPDH2, QARS, CCDC71, QRICH1, AC141002.1, PRKAR2A-AS1, SLC25A20, ARIH2OS, RP13-131K19.1, RP13-131K19.2, RP13-131K19.6, NDUFAF3, RN7SL182P, MIR6890, LAMB2, RP11-694I15.7, C3orf84	IP6K2 - PRKAR2A	51447	5576		16021	11302	rs11715835-T	intron_variant	1	0.0968876	2e-40	(Thioredoxin domain-containing protein 12)	0.9432	[0.81-1.08] unit increase	Affymetrix [509946]	N
32	rs7646366	3	49385417	rs13086611	2016-12-21	27046643	Davies G	2016-04-05	Mol Psychiatry	www.ncbi.nlm.nih.gov/pubmed/27046643	Genome-wide association study of cognitive functions and educational attainment in UK Biobank (N=112â€‰151).	Educational attainment	111,114 European ancestry individuals	NA	3p21.31	Intergenic	USP4 - GPX1	7375	2876		7881	9192	rs13086611-?	intergenic_variant	1	NR	2e-14		0.0354476	[NR] unit increase	Affymetrix [~ 17300000] (imputed)	N
32	rs7646366	3	49391082	rs13090388	2017-02-24	27225129	Okbay A	2016-05-26	Nature	www.ncbi.nlm.nih.gov/pubmed/27225129	Genome-wide association study identifies 74 loci associated with educational attainment.	Educational attainment (years of education)	405,072 European ancestry individuals	NA	3p21.31	NR	USP4 - GPX1	7375	2876		13546	3527	rs13090388-T	downstream_gene_variant	1	0.3104	3e-26		0.0255528	NR unit increase	Affymetrix, Illumina, Perlegen [~ 9300000] (imputed)	N
32	rs7646366	3	49406708	rs148734725	2017-02-25	27225129	Okbay A	2016-05-26	Nature	www.ncbi.nlm.nih.gov/pubmed/27225129	Genome-wide association study identifies 74 loci associated with educational attainment.	Educational attainment (college completion)	280,007 European ancestry individuals	NA	3p21.31	NR	RHOA			387			rs148734725-A	intron_variant	0	0.3236	5e-12		1.04501	[NR]	Affymetrix, Illumina, Perlegen [~ 9300000] (imputed)	N
32	rs7646366	3	49453834	rs6997	2015-11-08	25644384	Davies G	2015-02-03	Mol Psychiatry	www.ncbi.nlm.nih.gov/pubmed/25644384	Genetic contributions to variation in general cognitive function: a meta-analysis of genome-wide association studies in the CHARGE consortium (N=53â€‰949).	Cognitive function	51,719 European ancestry individuals 1,473 Erasmus Rupchen (founder/genetic isolate) individuals, 327 Korculan (founder/genetic isolate) individuals, 430 Orcadian (founder/genetic isolate) individuals	NA	3p21.31	TCTA, AMT, RHOA, NICN1	TCTA			6988			rs6997-?	3_prime_UTR_variant	0	NR	8e-06		0.0267	[0.015-0.038] unit increase	Affymetrix, Illumina [2478500] (imputed)	N
32	rs7646366	3	49455330	rs11715915	2017-03-31	27694959	Bonder MJ	2016-10-03	Nat Genet	www.ncbi.nlm.nih.gov/pubmed/27694959	The effect of host genetics on the gut microbiome.	Gut microbiota (functional units)	984 European ancestry individuals	530 European ancestry individuals	3p21.31	AMT, RHOA, DAG1, BSN	AMT			275			rs11715915-T	synonymous_variant	0	NR	4e-06	(GO:0009253|BP|07|peptidoglycan catabolic process)	4.63358	Z-score decrease	Illumina [8100000] (imputed)	N
32	rs7646366	3	49572140	rs4625	2016-08-31	26301688	Li YR	2015-08-24	Nat Med	www.ncbi.nlm.nih.gov/pubmed/26301688	Meta-analysis of shared genetic architecture across ten pediatric autoimmune diseases.	Pediatric autoimmune diseases	97 European ancestry thyroiditis cases, 107 European ancestry ankylosing spondylitis cases, 100 European ancestry psoriasis cases, 173 European ancestry celiac disease cases, 254 European ancestry systemic lupus erythematosus cases, 308 European ancestry common variable inmunodeficiency cases, 865 European ancestry ulcerative colitis cases, 1,086 European ancestry Type 1 diabetes cases, 1,123 Eur…	NA	3p21.31	DAG1	DAG1			1605			rs4625-G	3_prime_UTR_variant	0	0.31	8e-11				Illumina [7347414] (imputed)	N
32	rs7646366	3	49678651	rs4283605	2015-11-08	25644384	Davies G	2015-02-03	Mol Psychiatry	www.ncbi.nlm.nih.gov/pubmed/25644384	Genetic contributions to variation in general cognitive function: a meta-analysis of genome-wide association studies in the CHARGE consortium (N=53â€‰949).	Cognitive function	51,719 European ancestry individuals 1,473 Erasmus Rupchen (founder/genetic isolate) individuals, 327 Korculan (founder/genetic isolate) individuals, 430 Orcadian (founder/genetic isolate) individuals	NA	3p21.31	BSN	BSN			8927			rs4283605-?	intron_variant	0	NR	5e-06		0.0296	[0.017-0.042] unit decrease	Affymetrix, Illumina [2478500] (imputed)	N
32	rs7646366	3	49697459	rs9836291	2016-07-24	26192919	Liu JZ	2015-07-20	Nat Genet	www.ncbi.nlm.nih.gov/pubmed/26192919	Association analyses identify 38 susceptibility loci for inflammatory bowel disease and highlight shared genetic risk across populations.	Inflammatory bowel disease	12,882 European ancestry cases, 21,770 European ancestry controls	25,273 European ancestry cases, 26,715 European ancestry controls, 548 Iranian ancestry cases, 342 Iranian ancestry control, 1,423 Indian ancestry cases, 990 Indian ancestry controls, 2,824 East Asian ancestry cases, 3,719 East Asian ancestry controls	3p21.31	NR	BSN			8927			rs9836291-?	intron_variant	0	NR	1e-52	(EA)			Affymetrix, Illumina [~ 9000000] (imputed)	N
32	rs7646366	3	49701983	rs9858542	2008-06-16	17554261	Parkes M	2007-06-06	Nat Genet	www.ncbi.nlm.nih.gov/pubmed/17554261	Sequence variants in the autophagy gene IRGM and multiple other replicating loci contribute to Crohn's disease susceptibility.	Crohn's disease	1,748 cases, 2,938 controls	1,182 European ancestry cases, 2,024 European ancestry controls	3p21.31	MST1	BSN			8927			rs9858542-?	synonymous_variant	0	0.29	5e-08		1.17	[1.14-1.31]	Affymetrix [see WTCCC]	N
32	rs7646366	3	49701983	rs9858542	2008-06-16	17554300	WTCCC	2007-06-07	Nature	www.ncbi.nlm.nih.gov/pubmed/17554300	Genome-wide association study of 14,000 cases of seven common diseases and 3,000 shared controls.	Crohn's disease	1,748 European ancestry cases, 2,938 European ancestry controls	(see Parkes 2007)	3p21.31	MST1, BSN	BSN			8927			rs9858542-A	synonymous_variant	0	0.28	4e-08		1.09	[0.96-1.24]	Affymetrix [469557]	N
32	rs7646366	3	49701983	rs9858542	2009-12-11	19915572	Barrett JC	2009-11-15	Nat Genet	www.ncbi.nlm.nih.gov/pubmed/19915572	Genome-wide association study of ulcerative colitis identifies three new susceptibility loci, including the HNF4A region.	Ulcerative colitis	2,361 European ancestry cases, 5,417 European ancestry controls	2,321 European ancestry cases, 4,818 European ancestry controls	3p21.31	MST1	BSN			8927			rs9858542-?	synonymous_variant	0	NR	7e-09				Affymetrix [NR]	N
32	rs7646366	3	49701983	rs9858542	2017-07-18	28240269	Suhre K	2017-02-27	Nat Commun	www.ncbi.nlm.nih.gov/pubmed/28240269	Connecting genetic risk to disease end points through the human blood plasma proteome.	Blood protein levels	997 European ancestry individuals	338 Arab, South Asian and Filipino ancestry individuals	3p21.31	MST1, AMT, APEH, BSN, GPX1, NICN1, DAG1, RNF123, RHOA, RHOA-IT1, TCTA, RNA5SP130, BSN-AS2, BSN-AS1, AC099668.1, AC099668.5	BSN			8927			rs9858542-A	synonymous_variant	0	0.278169	1e-242	(Hepatocyte growth factor-like protein)	1.299	[1.24-1.36] unit decrease	Affymetrix [509946]	N
32	rs7646366	3	49719729	rs9822268	2011-03-29	21297633	Anderson CA	2011-02-06	Nat Genet	www.ncbi.nlm.nih.gov/pubmed/21297633	Meta-analysis identifies 29 additional ulcerative colitis risk loci, increasing the number of confirmed associations to 47.	Ulcerative colitis	6,687 European ancestry cases, 19,718 European ancestry controls	9,628 European ancestry cases, 12,917 European ancestry controls	3p21.31	UBA7, MST1, APEH, AMIGO3, GMPPB, BSN	APEH			327			rs9822268-A	intron_variant	0	0.3	2e-17		1.21	[1.16-1.26]	Affymetrix, Illumina [~ 1100000] (imputed)	N
32	rs7646366	3	49721532	rs3197999	2008-07-11	18587394	Barrett JC	2008-06-29	Nat Genet	www.ncbi.nlm.nih.gov/pubmed/18587394	Genome-wide association defines more than 30 distinct susceptibility loci for Crohn's disease.	Crohn's disease	3,230 European ancestry cases, 4,829 European ancestry controls	1,339 European ancestry trios, 2,325 European ancestry cases, 1,809 European ancestry controls	3p21.31	MST1	MST1			4485			rs3197999-A	missense_variant	0	0.27	1e-12		1.2	[NR]	Affymetrix, Illumina [635547] (imputed)	N
32	rs7646366	3	49721532	rs3197999	2010-04-02	20228799	McGovern DP	2010-03-14	Nat Genet	www.ncbi.nlm.nih.gov/pubmed/20228799	Genome-wide association identifies multiple ulcerative colitis susceptibility loci.	Ulcerative colitis	2,693 European ancestry cases, 6,791 European ancestry controls	2,009 European ancestry cases, 1,580 European ancestry controls	3p21.31	MST1	MST1			4485			rs3197999-T	missense_variant	0	NR	4e-09		1.21	[NR]	Illumina [266047]	N
32	rs7646366	3	49721532	rs3197999	2011-01-15	21151127	Melum E	2010-12-12	Nat Genet	www.ncbi.nlm.nih.gov/pubmed/21151127	Genome-wide association analysis in primary sclerosing cholangitis identifies two non-HLA susceptibility loci.	Primary sclerosing cholangitis	715 European ancestry cases, 2,962 European ancestry controls	1,025 European ancestry cases, 2,174 European ancestry controls	3p21.31	MST1	MST1			4485			rs3197999-?	missense_variant	0	0.28	1e-16		1.39	[1.24-1.56]	Affymetrix [2466182] (imputed)	N
32	rs7646366	3	49721532	rs3197999	2012-10-19	21102463	Franke A	2010-11-21	Nat Genet	www.ncbi.nlm.nih.gov/pubmed/21102463	Genome-wide meta-analysis increases to 71 the number of confirmed Crohn's disease susceptibility loci.	Crohn's disease	6,333 European ancestry cases, 15,056 European ancestry controls	15,694 European ancestry cases, 14,026 European ancestry controls, 414 European ancestry trios	3p21.31	MST1, GPX1, BSN	MST1			4485			rs3197999-A	missense_variant	0	0.297	6e-17		1.22	[1.16-1.27]	Affymetrix, Illumina [953241] (imputed)	N
32	rs7646366	3	49721532	rs3197999	2013-02-12	23128233	Jostins L	2012-11-01	Nature	www.ncbi.nlm.nih.gov/pubmed/23128233	Host-microbe interactions have shaped the genetic architecture of inflammatory bowel disease.	Inflammatory bowel disease	12,924 European ancestry cases, 21,442 European ancestry controls	25,683 European ancestry cases, 17,015 European ancestry controls	3p21.31	PFKFB4, MST1R, UCN2, IP6K2, MST1, IP6K1, GPX1, USP4, BSN	MST1			4485			rs3197999-A	missense_variant	0	0.296	1e-47		1.18	[1.144-1.216]	Affymetrix, Illumina [1230000] (imputed)	N
32	rs7646366	3	49721532	rs3197999	2015-04-16	25082827	JuliÃ A	2014-07-31	Hum Mol Genet	www.ncbi.nlm.nih.gov/pubmed/25082827	A genome-wide association study identifies a novel locus at 6q22.1 associated with ulcerative colitis.	Ulcerative colitis	up to 7,483 European ancestry cases, up to 21,211 European ancestry controls	1,073 European ancestry cases, 1,279 European ancestry controls	3p21.31	PFKFB4, MST1R, UCN2, GPX1, IP6K2, BSN, IP6K1, USP4, MST1	MST1			4485			rs3197999-?	missense_variant	0	NR	8e-07	(Southern European)	1.38	[1.21-1.56]	Illumina [546271]	N
32	rs7646366	3	49721532	rs3197999	2016-07-24	26192919	Liu JZ	2015-07-20	Nat Genet	www.ncbi.nlm.nih.gov/pubmed/26192919	Association analyses identify 38 susceptibility loci for inflammatory bowel disease and highlight shared genetic risk across populations.	Crohn's disease	5,956 European ancestry cases, 14,927 European ancestry controls	14,594 European ancestry cases, 26,715 European ancestry controls, 151 Iranian ancestry cases, 342 Iranian ancestry controls, 184 Indian ancestry cases, 990 Indian ancestry controls, 1,690 East Asian ancestry cases, 3,719 East Asian ancestry controls	3p21.31	NR	MST1			4485			rs3197999-A	missense_variant	0	0.2812	2e-33	(EA)	1.16779	[1.14-1.19]	Affymetrix, Illumina [~ 9000000] (imputed)	N
32	rs7646366	3	49721532	rs3197999	2016-07-24	26192919	Liu JZ	2015-07-20	Nat Genet	www.ncbi.nlm.nih.gov/pubmed/26192919	Association analyses identify 38 susceptibility loci for inflammatory bowel disease and highlight shared genetic risk across populations.	Ulcerative colitis	6,968 European ancestry cases, 20,464 European ancestry controls	10,679 European ancestry cases, 26,715 European ancestry controls, 397 Iranian ancestry cases, 342 Iranian ancestry controls, 1,239 Indian ancestry cases, 990 Indian ancestry controls, 1,134 East Asian ancestry cases, 3,719 East Asian ancestry controls	3p21.31	NR	MST1			4485			rs3197999-A	missense_variant	0	0.2812	2e-37	(EA)	1.18658	[1.16-1.21]	Affymetrix, Illumina [~ 9000000] (imputed)	N
32	rs7646366	3	49721532	rs3197999	2017-05-12	27992413	Ji SG	2016-12-19	Nat Genet	www.ncbi.nlm.nih.gov/pubmed/27992413	Genome-wide association study of primary sclerosing cholangitis identifies new risk loci and quantifies the genetic relationship with inflammatory bowel disease.	Primary sclerosing cholangitis	2,871 European ancestry cases, 12,019 European ancestry controls	1,925 European ancestry cases, 7,936 European ancestry controls	3p21.31	MST1	MST1			4485			rs3197999-A	missense_variant	0	0.3	5e-26		1.33	[1.26-1.40]	Affymetrix, Illumina [7891602] (imputed)	N
32	rs7646366	3	49721532	rs3197999	2017-06-02	28067908	de Lange KM	2017-01-09	Nat Genet	www.ncbi.nlm.nih.gov/pubmed/28067908	Genome-wide association study implicates immune activation of multiple integrin genes in inflammatory bowel disease.	Crohn's disease	12,194 European and unknown ancestry cases, 28,072 European and unknown ancestry controls	NA	3p21.31	TMA7, TREX1, UCN2, TMEM89, SLC26A6, WDR6, NDUFAF3, IMPDH2, KLHDC8B, RP11-3B7.1, C3orf62, GPX1, TCTA, AMT, APEH, PLXNB1, CCDC51, SHISA5, PFKFB4, UQCRC1, CELSR3, NCKIPSD, PRKAR2A, SLC25A20, ARIH2OS, P4HTM, DALRD3, QRICH1, QARS, LAMB2, CCDC71, C3orf84, USP4, NICN1, MST1, RNF123, ATRIP, COL7A1, IP6K2, ARIH2, USP19, RHOA, DAG1, BSN, CCDC36	MST1			4485			rs3197999-?	missense_variant	0		3e-23				Illumina [9560910] (imputed)	N
32	rs7646366	3	49721532	rs3197999	2017-06-02	28067908	de Lange KM	2017-01-09	Nat Genet	www.ncbi.nlm.nih.gov/pubmed/28067908	Genome-wide association study implicates immune activation of multiple integrin genes in inflammatory bowel disease.	Inflammatory bowel disease	25,042 European and unknown ancestry cases, 34,915 European and unknown ancestry controls	NA	3p21.31	TMA7, TREX1, UCN2, TMEM89, SLC26A6, WDR6, NDUFAF3, IMPDH2, KLHDC8B, RP11-3B7.1, C3orf62, GPX1, TCTA, AMT, APEH, PLXNB1, CCDC51, SHISA5, PFKFB4, UQCRC1, CELSR3, NCKIPSD, PRKAR2A, SLC25A20, ARIH2OS, P4HTM, DALRD3, QRICH1, QARS, LAMB2, CCDC71, C3orf84, USP4, NICN1, MST1, RNF123, ATRIP, COL7A1, IP6K2, ARIH2, USP19, RHOA, DAG1, BSN, CCDC36	MST1			4485			rs3197999-?	missense_variant	0		1e-33				Illumina [9725440] (imputed)	N
32	rs7646366	3	49721532	rs3197999	2017-06-02	28067908	de Lange KM	2017-01-09	Nat Genet	www.ncbi.nlm.nih.gov/pubmed/28067908	Genome-wide association study implicates immune activation of multiple integrin genes in inflammatory bowel disease.	Ulcerative colitis	12,366 European and unknown ancestry cases, 33,609 European and unknown ancestry controls	NA	3p21.31	TMA7, TREX1, UCN2, TMEM89, SLC26A6, WDR6, NDUFAF3, IMPDH2, KLHDC8B, RP11-3B7.1, C3orf62, GPX1, TCTA, AMT, APEH, PLXNB1, CCDC51, SHISA5, PFKFB4, UQCRC1, CELSR3, NCKIPSD, PRKAR2A, SLC25A20, ARIH2OS, P4HTM, DALRD3, QRICH1, QARS, LAMB2, CCDC71, C3orf84, USP4, NICN1, MST1, RNF123, ATRIP, COL7A1, IP6K2, ARIH2, USP19, RHOA, DAG1, BSN, CCDC36	MST1			4485			rs3197999-?	missense_variant	0		8e-20				Illumina [9578670] (imputed)	N
32	rs7646366	3	49731861	rs9858213	2015-05-08	25201988	Rietveld CA	2014-09-08	Proc Natl Acad Sci U S A	www.ncbi.nlm.nih.gov/pubmed/25201988	Common genetic variants associated with cognitive performance identified using the proxy-phenotype method.	Educational attainment	106,736 European ancestry individuals	NA	3p21.31	intergenic	RNF123			63891			rs9858213-T	intron_variant	0	0.288	5e-09		0.028	[NR] unit increase	Affymetrix, Illumina [NR] (imputed)	N
32	rs71324996	3	49770032	rs3749237	2017-03-27	27798624	Eppinga RN	2016-10-31	Nat Genet	www.ncbi.nlm.nih.gov/pubmed/27798624	Identification of genomic loci associated with resting heart rate and shared genetic predictors with all-cause mortality.	Resting heart rate	127,919 European ancestry individuals, 2,478 Asian ancestry individuals, 1,734 Black individuals, 684 Mixed ancestry individuals, 1,436 individuals	130,795 European ancestry individuals	3p21.31	IP6K1, GMPPB, FAM212A, DAG1, KLHDC8B, LAMB2, PRKAR2A, QRICH1	IP6K1			9807			rs3749237-A	intron_variant	0	0.32	3e-13		0.2583	[0.19-0.33] unit increase	Affymetrix [19941912] (imputed)	N
32	rs11130226	3	49898000	rs2777888	2017-03-22	27798627	Barban N	2016-10-31	Nat Genet	www.ncbi.nlm.nih.gov/pubmed/27798627	Genome-wide analysis identifies 12 loci influencing human reproductive behavior.	Age at first birth	189,656 European ancestry women, 48,408 European ancestry men		3p21.31	CAMKV, HYAL3, RBM6, RNF123, RBM5, MON1A, U73166.2, MST1R	CAMKV			79012			rs2777888-A	intron_variant	0	0.507	2e-06	(men)	0.155	NR unit increase	Illumina [2400000] (imputed)	N
32	rs11130226	3	49898000	rs2777888	2017-03-22	27798627	Barban N	2016-10-31	Nat Genet	www.ncbi.nlm.nih.gov/pubmed/27798627	Genome-wide analysis identifies 12 loci influencing human reproductive behavior.	Age at first birth	189,656 European ancestry women, 48,408 European ancestry men		3p21.31	CAMKV, HYAL3, RBM6, RNF123, RBM5, MON1A, U73166.2, MST1R	CAMKV			79012			rs2777888-A	intron_variant	0	0.507	5e-15		0.106	NR unit increase	Illumina [2400000] (imputed)	N
32	rs11130226	3	49898000	rs2777888	2017-03-22	27798627	Barban N	2016-10-31	Nat Genet	www.ncbi.nlm.nih.gov/pubmed/27798627	Genome-wide analysis identifies 12 loci influencing human reproductive behavior.	Age at first birth	189,656 European ancestry women, 48,408 European ancestry men		3p21.31	CAMKV, HYAL3, RBM6, RNF123, RBM5, MON1A, U73166.2, MST1R	CAMKV			79012			rs2777888-A	intron_variant	0	0.507	6e-10	(women)	0.095	NR unit increase	Illumina [2400000] (imputed)	N
32	rs7613360	3	49901060	rs11130222	2016-12-21	27046643	Davies G	2016-04-05	Mol Psychiatry	www.ncbi.nlm.nih.gov/pubmed/27046643	Genome-wide association study of cognitive functions and educational attainment in UK Biobank (N=112â€‰151).	Educational attainment	111,114 European ancestry individuals	NA	3p21.31	CAMKV	CAMKV, RN7SL217P			79012, 106479301			rs11130222-?	non_coding_transcript_exon_variant	0	NR	4e-14		0.0324711	[NR] unit decrease	Affymetrix [~ 17300000] (imputed)	N
32	rs7613360	3	49901060	rs11130222	2017-02-24	27225129	Okbay A	2016-05-26	Nature	www.ncbi.nlm.nih.gov/pubmed/27225129	Genome-wide association study identifies 74 loci associated with educational attainment.	Educational attainment (years of education)	405,072 European ancestry individuals	NA	3p21.31	NR	CAMKV, RN7SL217P			79012, 106479301			rs11130222-A	non_coding_transcript_exon_variant	0	0.5853	4e-28		0.0248127	NR unit increase	Affymetrix, Illumina, Perlegen [~ 9300000] (imputed)	N
32	rs7613360	3	49914397	rs11712056	2017-02-25	27225129	Okbay A	2016-05-26	Nature	www.ncbi.nlm.nih.gov/pubmed/27225129	Genome-wide association study identifies 74 loci associated with educational attainment.	Educational attainment (college completion)	280,007 European ancestry individuals	NA	3p21.31	NR	ACTBP13			389120			rs11712056-T	non_coding_transcript_exon_variant	0	0.5717	2e-16		1.05001	[NR]	Affymetrix, Illumina, Perlegen [~ 9300000] (imputed)	N
32	rs11130226	3	49971514	rs7613875	2016-01-27	25673413	Locke AE	2015-02-12	Nature	www.ncbi.nlm.nih.gov/pubmed/25673413	Genetic studies of body mass index yield new insights for obesity biology.	Body mass index	up to 104,666 European ancestry male individuals, up to 132,115 European ancestry female individuals, 370 African American male individuals, 517 African American female individuals, 512 Hispanic male individuals, 764 Hispanic female individuals	up to 48,274 European ancestry male individuals, up to 39,864 European ancestry female individuals, 2,441 African American or Afro-Caribbean male individuals, 6,314 African American or Afro-Caribbean female individuals, 919 Filipino male individuals, 828 Filipino female individuals, 205 Seychelles male individuals, 287 Seychelles female individuals, 2,964 South Asian ancestry male individuals, 65…	3p21.31	MON1A	MON1A - RBM6	84315	10180		4069	5957	rs7613875-A	upstream_gene_variant	1	0.531	5e-07		0.016	[0.0095-0.0217] kg/m2 increase	Affymetrix, Illumina [2550021]	N
32	rs11130226	3	49971514	rs7613875	2016-01-27	25673413	Locke AE	2015-02-12	Nature	www.ncbi.nlm.nih.gov/pubmed/25673413	Genetic studies of body mass index yield new insights for obesity biology.	Body mass index	up to 104,666 European ancestry male individuals, up to 132,115 European ancestry female individuals, 370 African American male individuals, 517 African American female individuals, 512 Hispanic male individuals, 764 Hispanic female individuals	up to 48,274 European ancestry male individuals, up to 39,864 European ancestry female individuals, 2,441 African American or Afro-Caribbean male individuals, 6,314 African American or Afro-Caribbean female individuals, 919 Filipino male individuals, 828 Filipino female individuals, 205 Seychelles male individuals, 287 Seychelles female individuals, 2,964 South Asian ancestry male individuals, 65…	3p21.31	MON1A	MON1A - RBM6	84315	10180		4069	5957	rs7613875-A	upstream_gene_variant	1	0.53	1e-06	(EA, men)	0.021	[0.012-0.029] kg/m2 increase	Affymetrix, Illumina [2550021]	N
32	rs11130226	3	49971514	rs7613875	2016-01-27	25673413	Locke AE	2015-02-12	Nature	www.ncbi.nlm.nih.gov/pubmed/25673413	Genetic studies of body mass index yield new insights for obesity biology.	Body mass index	up to 104,666 European ancestry male individuals, up to 132,115 European ancestry female individuals, 370 African American male individuals, 517 African American female individuals, 512 Hispanic male individuals, 764 Hispanic female individuals	up to 48,274 European ancestry male individuals, up to 39,864 European ancestry female individuals, 2,441 African American or Afro-Caribbean male individuals, 6,314 African American or Afro-Caribbean female individuals, 919 Filipino male individuals, 828 Filipino female individuals, 205 Seychelles male individuals, 287 Seychelles female individuals, 2,964 South Asian ancestry male individuals, 65…	3p21.31	MON1A	MON1A - RBM6	84315	10180		4069	5957	rs7613875-A	upstream_gene_variant	1	0.53	7e-07	(EA)	0.016	[0.0095-0.0221] kg/m2 increase	Affymetrix, Illumina [2550021]	N
32	rs11716820	3	50008118	rs4688759	2017-07-18	28240269	Suhre K	2017-02-27	Nat Commun	www.ncbi.nlm.nih.gov/pubmed/28240269	Connecting genetic risk to disease end points through the human blood plasma proteome.	Blood protein levels	997 European ancestry individuals	338 Arab, South Asian and Filipino ancestry individuals	3p21.31	RBM6, RNF123, BSN, AMIGO3, GMPPB, IP6K1, RP13-1056D16.2, TRAIP, RN7SL217P, CAMKV, AC139451.2, ACTBP13, RBM5	RBM6			10180			rs4688759-C	intron_variant	0	0.102307	2e-42	(Thioredoxin domain-containing protein 12)	0.9591	[0.83-1.09] unit increase	Affymetrix [509946]	N
32	rs11716820	3	50056265	rs2624818	2017-02-24	27225129	Okbay A	2016-05-26	Nature	www.ncbi.nlm.nih.gov/pubmed/27225129	Genome-wide association study identifies 74 loci associated with educational attainment.	Educational attainment (years of education)	405,072 European ancestry individuals	NA	3p21.31	NR	RBM6			10180			rs2624818-A	intron_variant	0	0.105	9e-09		0.0213833	NR unit increase	Affymetrix, Illumina, Perlegen [~ 9300000] (imputed)	N
32	rs7613360	3	50093209	rs6762477	2014-07-01	21102462	Elks CE	2010-11-21	Nat Genet	www.ncbi.nlm.nih.gov/pubmed/21102462	Thirty new loci for age at menarche identified by a meta-analysis of genome-wide association studies.	Menarche (age at onset)	86,142 European ancestry female individuals, 557 Old Order Amish (founder/genetic isolate) female individuals, 1,103 Erasmus Rucphen (founder/genetic isolate) female individuals	Up to 12,813 European ancestry female individuals, 910 Val Borbera (founder/genetic isolate) female individuals, 348 Orcadian (founder/genetic isolate) female individuals, 338 Friuli Venezia Giulia (founder/genetic isolate) female individuals, 322 Carlantino (founder/genetic/isolate) female individuals	3p21.31	RBM6	RBM6			10180			rs6762477-G	intron_variant	0	0.44	2e-08		2.5	[1.72-3.28] week increase	Affymetrix, Illumina [~ 2500000] (imputed)	N
32	rs7613360	3	50093209	rs6762477	2015-04-23	25231870	Perry JR	2014-07-23	Nature	www.ncbi.nlm.nih.gov/pubmed/25231870	Parent-of-origin-specific allelic associations among 106 genomic loci for age at menarche.	Menarche (age at onset)	Up to 182,413 European ancestry females	NA	3p21.31	WDR6, UBA7	RBM6			10180			rs6762477-G	intron_variant	0	0.44	8e-12		0.04	[0.028-0.052] unit increase	Affymetrix, Illumina [2441815] (imputed)	N
32	rs11130226	3	50129399	rs2013208	2014-05-12	24097068	Willer CJ	2013-10-06	Nat Genet	www.ncbi.nlm.nih.gov/pubmed/24097068	Discovery and refinement of loci associated with lipid levels.	HDL cholesterol	94,595 European ancestry individuals	93,982 European ancestry individuals	3p21.31	RBM5	RBM5			10181			rs2013208-T	intron_variant	0	0.5	9e-12		0.025	[NR] unit increase	NR [NR] (imputed)	N
32	rs11130226	3	50129399	rs2013208	2017-06-26	28334899	Spracklen CN	2017-02-21	Hum Mol Genet	www.ncbi.nlm.nih.gov/pubmed/28334899	Association analyses of East Asian individuals and trans-ancestry analyses with European individuals reveal new loci associated with cholesterol and triglyceride levels.	HDL cholesterol levels	34,930 East Asian ancestry individuals, 187,167 European ancestry individuals	8,741 Chinese ancestry individuals	3p21.31	RBM5	RBM5			10181			rs2013208-T	intron_variant	0	0.505	1e-12	(Trans-ethnic initial)	0.0254	[0.018-0.032] unit increase (EA Beta values)	Affymetrix, Illumina [~ 1900000] (imputed)	N
33	rs12489732	3	52279594	rs7618915	2012-01-27	22182935	Chen DT	2011-12-20	Mol Psychiatry	www.ncbi.nlm.nih.gov/pubmed/22182935	Genome-wide association study meta-analysis of European and Asian-ancestry samples identifies three novel loci associated with bipolar disorder.	Bipolar disorder	5,568 European ancestry cases, 7,187 European ancestry controls, 1,000 Taiwanese ancestry cases, 1,000 Taiwanese ancestry controls	1,115 European ancestry cases, 2,728 European ancestry controls	3p21.2	intergenic	LOC101929054 - PPM1M	101929054	132160		4481	147	rs7618915-G	upstream_gene_variant	1	NR	3e-10				Affymetrix, Illumina [748555]	N
33	rs11717383	3	52287468	rs11717383	2016-07-23	26198764	Goes FS	2015-07-21	Am J Med Genet B Neuropsychiatr Genet	www.ncbi.nlm.nih.gov/pubmed/26198764	Genome-wide association study of schizophrenia in Ashkenazi Jews.	Schizophrenia	592 Ashkenazi Jewish ancestry cases, 505 Ashkenazi Jewish ancestry controls, 36,989 cases, 113,075 controls	NA	3p21.2	NR	PPM1M - WDR82	132160	80335		2853	970	rs11717383-G	downstream_gene_variant	1	NR	3e-09		1.06383	[NR]	Illumina [7158791] (imputed)	N
33	rs11717383	3	52338852	rs9311474	2015-09-14	25387704	Malone SM	2014-12-01	Psychophysiology	www.ncbi.nlm.nih.gov/pubmed/25387704	Heritability and molecular-genetic basis of resting EEG activity: A genome-wide association study.	Electroencephalogram traits	2,383 European ancestry adolescents and 1,643 European ancestry adults from 1,613 families	NA	3p21.1	DNAH1	GLYCTK - DNAH1	132158	25981		9580	8174	rs9311474-?	intergenic_variant	1	NR	9e-06	(Alpha power, Cz)	0.094	[0.053-0.135] unit increase	Illumina [527829]	N
33	rs6778735	3	52566065	rs4282054	2015-11-08	25644384	Davies G	2015-02-03	Mol Psychiatry	www.ncbi.nlm.nih.gov/pubmed/25644384	Genetic contributions to variation in general cognitive function: a meta-analysis of genome-wide association studies in the CHARGE consortium (N=53â€‰949).	Cognitive function	51,719 European ancestry individuals 1,473 Erasmus Rupchen (founder/genetic isolate) individuals, 327 Korculan (founder/genetic isolate) individuals, 430 Orcadian (founder/genetic isolate) individuals	NA	3p21.1	NT5DC2, STAB1	NT5DC2			64943			rs4282054-?	intron_variant	0	NR	5e-06		0.0255	[0.015-0.036] unit decrease	Affymetrix, Illumina [2478500] (imputed)	N
33	rs6778735	3	52567014	rs12489828	2016-02-04	25673412	Shungin D	2015-02-12	Nature	www.ncbi.nlm.nih.gov/pubmed/25673412	New genetic loci link adipose and insulin biology to body fat distribution.	Waist-to-hip ratio adjusted for body mass index	up to 56,910 European ancestry men, up to 86,570 European ancestry women	up to 36,570 European ancestry men, 30,172 European ancestry women, 915 Filipino ancestry men, 735 Filipino ancestry women, 2,351 African American/Afro-Caribbean ancestry men, 6,258 African American/Afro-Caribbean ancestry women, 2,285 South Asian ancestry men, 506 South Asian ancestry women, 195 Seychellois ancestry men, 266 Seychellois ancestry women	3p21.1	NT5DC2	NT5DC2			64943			rs12489828-T	intron_variant	0	0.5409	3e-10		0.0215	[0.015-0.028] unit decrease	Affymetrix, Illumina, Perlegen [up to 2542447] (imputed)	N
33	rs6778735	3	52567014	rs12489828	2016-02-04	25673412	Shungin D	2015-02-12	Nature	www.ncbi.nlm.nih.gov/pubmed/25673412	New genetic loci link adipose and insulin biology to body fat distribution.	Waist-to-hip ratio adjusted for body mass index	up to 56,910 European ancestry men, up to 86,570 European ancestry women	up to 36,570 European ancestry men, 30,172 European ancestry women, 915 Filipino ancestry men, 735 Filipino ancestry women, 2,351 African American/Afro-Caribbean ancestry men, 6,258 African American/Afro-Caribbean ancestry women, 2,285 South Asian ancestry men, 506 South Asian ancestry women, 195 Seychellois ancestry men, 266 Seychellois ancestry women	3p21.1	NT5DC2	NT5DC2			64943			rs12489828-T	intron_variant	0	0.5425	1e-09	(women)	0.0277	[0.019-0.037] unit decrease	Affymetrix, Illumina, Perlegen [up to 2542447] (imputed)	N
33	rs6778735	3	52567014	rs12489828	2016-02-04	25673412	Shungin D	2015-02-12	Nature	www.ncbi.nlm.nih.gov/pubmed/25673412	New genetic loci link adipose and insulin biology to body fat distribution.	Waist-to-hip ratio adjusted for body mass index	up to 56,910 European ancestry men, up to 86,570 European ancestry women	up to 36,570 European ancestry men, 30,172 European ancestry women, 915 Filipino ancestry men, 735 Filipino ancestry women, 2,351 African American/Afro-Caribbean ancestry men, 6,258 African American/Afro-Caribbean ancestry women, 2,285 South Asian ancestry men, 506 South Asian ancestry women, 195 Seychellois ancestry men, 266 Seychellois ancestry women	3p21.1	NT5DC2	NT5DC2			64943			rs12489828-T	intron_variant	0	0.5486	3e-10	(EA, women)	0.0294	[0.02-0.038] unit decrease	Affymetrix, Illumina, Perlegen [up to 2542447] (imputed)	N
33	rs6778735	3	52567014	rs12489828	2016-02-04	25673412	Shungin D	2015-02-12	Nature	www.ncbi.nlm.nih.gov/pubmed/25673412	New genetic loci link adipose and insulin biology to body fat distribution.	Waist-to-hip ratio adjusted for body mass index	up to 56,910 European ancestry men, up to 86,570 European ancestry women	up to 36,570 European ancestry men, 30,172 European ancestry women, 915 Filipino ancestry men, 735 Filipino ancestry women, 2,351 African American/Afro-Caribbean ancestry men, 6,258 African American/Afro-Caribbean ancestry women, 2,285 South Asian ancestry men, 506 South Asian ancestry women, 195 Seychellois ancestry men, 266 Seychellois ancestry women	3p21.1	NT5DC2	NT5DC2			64943			rs12489828-T	intron_variant	0	0.5488	7e-11	(EA)	0.0227	[0.016-0.03] unit decrease	Affymetrix, Illumina, Perlegen [up to 2542447] (imputed)	N
33	rs6778735	3	52567014	rs12489828	2017-05-23	25673412	Shungin D	2015-02-12	Nature	www.ncbi.nlm.nih.gov/pubmed/25673412	New genetic loci link adipose and insulin biology to body fat distribution.	Waist circumference adjusted for body mass index	up to 56,910 European ancestry men, up to 86,570 European ancestry women	up to 36,570 European ancestry men, 30,172 European ancestry women, 915 Filipino ancestry men, 735 Filipino ancestry women, 2,351 African American/Afro-Caribbean ancestry men, 6,258 African American/Afro-Caribbean ancestry women, 2,285 South Asian ancestry men, 506 South Asian ancestry women, 195 Seychellois ancestry men, 266 Seychellois ancestry women	3p21.1	NT5DC2	NT5DC2			64943			rs12489828-T	intron_variant	0	0.5485	1e-08	(EA)	0.0197	[0.013-0.026] unit decrease	Affymetrix, Illumina, Perlegen [up to 2542447] (imputed)	N
33	rs6778735	3	52567014	rs12489828	2017-05-23	25673412	Shungin D	2015-02-12	Nature	www.ncbi.nlm.nih.gov/pubmed/25673412	New genetic loci link adipose and insulin biology to body fat distribution.	Waist circumference adjusted for body mass index	up to 56,910 European ancestry men, up to 86,570 European ancestry women	up to 36,570 European ancestry men, 30,172 European ancestry women, 915 Filipino ancestry men, 735 Filipino ancestry women, 2,351 African American/Afro-Caribbean ancestry men, 6,258 African American/Afro-Caribbean ancestry women, 2,285 South Asian ancestry men, 506 South Asian ancestry women, 195 Seychellois ancestry men, 266 Seychellois ancestry women	3p21.1	NT5DC2	NT5DC2			64943			rs12489828-T	intron_variant	0	0.5485	6e-10	(EA,women)	0.0273	[0.019-0.036] unit decrease	Affymetrix, Illumina, Perlegen [up to 2542447] (imputed)	N
33	rs6778735	3	52567014	rs12489828	2017-08-10	28443625	Justice AE	2017-04-26	Nat Commun	www.ncbi.nlm.nih.gov/pubmed/28443625	Genome-wide meta-analysis of 241,258 adults accounting for smoking behaviour identifies novel loci for obesity traits.	Waist circumference adjusted for BMI (adjusted for smoking behaviour)	97,400 European ancestry women, 63,892 European ancestry men, 5,829 European ancestry individuals, 10,500 African American/Afro-Caribbean ancestry women, 2,706 African American/Afro-Caribbean ancestry men, 1,030 Indian Asian ancestry women, 7,648 Indian Asian ancestry men, 1,793 Filipino ancestry women, 2,944 Hispanic/Latino ancestry women, 1,764 Hispanic/Latino ancestry men	21,496 European ancestry women, 24,385 European ancestry men, 118,364 European ancestry individuals, 2,326 African American/Afro-Caribbean ancestry women, 855 African American/Afro-Caribbean ancestry men	3p21.1	NT5DC2	NT5DC2			64943			rs12489828-T	intron_variant	0	0.5401	4e-07	(women)	0.0229	[0.014-0.032] unit decrease	Affymetrix, Illumina, Perlegen [up to 2800000] (imputed)	N
33	rs6778735	3	52567014	rs12489828	2017-08-10	28443625	Justice AE	2017-04-26	Nat Commun	www.ncbi.nlm.nih.gov/pubmed/28443625	Genome-wide meta-analysis of 241,258 adults accounting for smoking behaviour identifies novel loci for obesity traits.	Waist circumference adjusted for BMI (adjusted for smoking behaviour)	97,400 European ancestry women, 63,892 European ancestry men, 5,829 European ancestry individuals, 10,500 African American/Afro-Caribbean ancestry women, 2,706 African American/Afro-Caribbean ancestry men, 1,030 Indian Asian ancestry women, 7,648 Indian Asian ancestry men, 1,793 Filipino ancestry women, 2,944 Hispanic/Latino ancestry women, 1,764 Hispanic/Latino ancestry men	21,496 European ancestry women, 24,385 European ancestry men, 118,364 European ancestry individuals, 2,326 African American/Afro-Caribbean ancestry women, 855 African American/Afro-Caribbean ancestry men	3p21.1	NT5DC2	NT5DC2			64943			rs12489828-T	intron_variant	0	0.5401	7e-07		0.0179	[0.011-0.025] unit decrease	Affymetrix, Illumina, Perlegen [up to 2800000] (imputed)	N
33	rs6778735	3	52567014	rs12489828	2017-08-10	28443625	Justice AE	2017-04-26	Nat Commun	www.ncbi.nlm.nih.gov/pubmed/28443625	Genome-wide meta-analysis of 241,258 adults accounting for smoking behaviour identifies novel loci for obesity traits.	Waist circumference adjusted for BMI (joint analysis main effects and smoking interaction)	97,400 European ancestry women, 63,892 European ancestry men, 5,829 European ancestry individuals, 10,500 African American/Afro-Caribbean ancestry women, 2,706 African American/Afro-Caribbean ancestry men, 1,030 Indian Asian ancestry women, 7,648 Indian Asian ancestry men, 1,793 Filipino ancestry women, 2,944 Hispanic/Latino ancestry women, 1,764 Hispanic/Latino ancestry men	21,496 European ancestry women, 24,385 European ancestry men, 118,364 European ancestry individuals, 2,326 African American/Afro-Caribbean ancestry women, 855 African American/Afro-Caribbean ancestry men	3p21.1	NT5DC2	NT5DC2			64943			rs12489828-T	intron_variant	0	0.5401	1e-06	(women)			Affymetrix, Illumina, Perlegen [up to 2800000] (imputed)	N
33	rs6778735	3	52567014	rs12489828	2017-08-10	28443625	Justice AE	2017-04-26	Nat Commun	www.ncbi.nlm.nih.gov/pubmed/28443625	Genome-wide meta-analysis of 241,258 adults accounting for smoking behaviour identifies novel loci for obesity traits.	Waist circumference adjusted for BMI (joint analysis main effects and smoking interaction)	97,400 European ancestry women, 63,892 European ancestry men, 5,829 European ancestry individuals, 10,500 African American/Afro-Caribbean ancestry women, 2,706 African American/Afro-Caribbean ancestry men, 1,030 Indian Asian ancestry women, 7,648 Indian Asian ancestry men, 1,793 Filipino ancestry women, 2,944 Hispanic/Latino ancestry women, 1,764 Hispanic/Latino ancestry men	21,496 European ancestry women, 24,385 European ancestry men, 118,364 European ancestry individuals, 2,326 African American/Afro-Caribbean ancestry women, 855 African American/Afro-Caribbean ancestry men	3p21.1	NT5DC2	NT5DC2			64943			rs12489828-T	intron_variant	0	0.5401	3e-07				Affymetrix, Illumina, Perlegen [up to 2800000] (imputed)	N
33	rs6778735	3	52567014	rs12489828	2017-08-10	28443625	Justice AE	2017-04-26	Nat Commun	www.ncbi.nlm.nih.gov/pubmed/28443625	Genome-wide meta-analysis of 241,258 adults accounting for smoking behaviour identifies novel loci for obesity traits.	Waist-to-hip ratio adjusted for BMI (adjusted for smoking behaviour)	95,362 European ancestry women, 62,085 European ancestry men, 5,829 European ancestry individuals, 10,500 African American/Afro-Caribbean ancestry women, 2,706 African American/Afro-Caribbean ancestry men, 1,030 Indian Asian ancestry women, 7,648 Indian Asian ancestry men, 1,793 Filipino ancestry women, 2,944 Hispanic/Latino ancestry women, 1,764 Hispanic/Latino ancestry men	21,496 European ancestry women, 24,385 European ancestry men, 118,364 European ancestry individuals, 2,326 African American/Afro-Caribbean ancestry women, 855 African American/Afro-Caribbean ancestry men	3p21.1	NT5DC2	NT5DC2			64943			rs12489828-T	intron_variant	0	0.54	2e-06		0.0173	[0.01-0.024] unit decrease	Affymetrix, Illumina, Perlegen [up to 2800000] (imputed)	N
33	rs12489732	3	52584787	rs2251219	2010-02-08	20081856	McMahon FJ	2010-01-17	Nat Genet	www.ncbi.nlm.nih.gov/pubmed/20081856	Meta-analysis of genome-wide association data identifies a risk locus for major mood disorders on 3p21.1.	Major mood disorders	6,686 European ancestry cases, 9,068 European ancestry controls	1,930 European ancestry cases, 2,747 European ancestry controls	3p21.1	PBRM1	PBRM1			55193			rs2251219-?	synonymous_variant	0	0.59	2e-09		1.14	[1.09-1.18]	Affymetrix, Illumina, Perlegen [~ 2100000] (imputed)	N
33	rs6778735	3	52622086	rs2590838	2012-05-10	22479202	Dastani Z	2012-03-29	PLoS Genet	www.ncbi.nlm.nih.gov/pubmed/22479202	Novel loci for adiponectin levels and their influence on type 2 diabetes and metabolic traits: a multi-ethnic meta-analysis of 45,891 individuals.	Adiponectin levels	29,347 European ancestry individuals, 4,232 African American individuals, 1,776 Filipino ancestry individuals	NA	3p21.1	GNL3	PBRM1			55193			rs2590838-G	intron_variant	0	0.51	2e-13		0.03	[0.022-0.038] unit decrease	Affymetrix, Illumina [NR] (imputed)	N
33	rs9879090	3	52637486	rs2276824	2016-02-04	25673412	Shungin D	2015-02-12	Nature	www.ncbi.nlm.nih.gov/pubmed/25673412	New genetic loci link adipose and insulin biology to body fat distribution.	Waist-to-hip ratio adjusted for body mass index	up to 56,910 European ancestry men, up to 86,570 European ancestry women	up to 36,570 European ancestry men, 30,172 European ancestry women, 915 Filipino ancestry men, 735 Filipino ancestry women, 2,351 African American/Afro-Caribbean ancestry men, 6,258 African American/Afro-Caribbean ancestry women, 2,285 South Asian ancestry men, 506 South Asian ancestry women, 195 Seychellois ancestry men, 266 Seychellois ancestry women	3p21.1	PBRM1	PBRM1			55193			rs2276824-C	intron_variant	0	0.4283	1e-08	(women)	0.0265	[0.017-0.036] unit increase	Affymetrix, Illumina, Perlegen [up to 2542447] (imputed)	N
33	rs9879090	3	52637486	rs2276824	2016-02-04	25673412	Shungin D	2015-02-12	Nature	www.ncbi.nlm.nih.gov/pubmed/25673412	New genetic loci link adipose and insulin biology to body fat distribution.	Waist-to-hip ratio adjusted for body mass index	up to 56,910 European ancestry men, up to 86,570 European ancestry women	up to 36,570 European ancestry men, 30,172 European ancestry women, 915 Filipino ancestry men, 735 Filipino ancestry women, 2,351 African American/Afro-Caribbean ancestry men, 6,258 African American/Afro-Caribbean ancestry women, 2,285 South Asian ancestry men, 506 South Asian ancestry women, 195 Seychellois ancestry men, 266 Seychellois ancestry women	3p21.1	PBRM1	PBRM1			55193			rs2276824-C	intron_variant	0	0.4322	4e-09	(EA, women)	0.028	[0.019-0.037] unit increase	Affymetrix, Illumina, Perlegen [up to 2542447] (imputed)	N
33	rs9879090	3	52637486	rs2276824	2016-02-04	25673412	Shungin D	2015-02-12	Nature	www.ncbi.nlm.nih.gov/pubmed/25673412	New genetic loci link adipose and insulin biology to body fat distribution.	Waist-to-hip ratio adjusted for body mass index	up to 56,910 European ancestry men, up to 86,570 European ancestry women	up to 36,570 European ancestry men, 30,172 European ancestry women, 915 Filipino ancestry men, 735 Filipino ancestry women, 2,351 African American/Afro-Caribbean ancestry men, 6,258 African American/Afro-Caribbean ancestry women, 2,285 South Asian ancestry men, 506 South Asian ancestry women, 195 Seychellois ancestry men, 266 Seychellois ancestry women	3p21.1	PBRM1	PBRM1			55193			rs2276824-C	intron_variant	0	0.4332	7e-11		0.0224	[0.016-0.029] unit increase	Affymetrix, Illumina, Perlegen [up to 2542447] (imputed)	N
33	rs9879090	3	52637486	rs2276824	2016-02-04	25673412	Shungin D	2015-02-12	Nature	www.ncbi.nlm.nih.gov/pubmed/25673412	New genetic loci link adipose and insulin biology to body fat distribution.	Waist-to-hip ratio adjusted for body mass index	up to 56,910 European ancestry men, up to 86,570 European ancestry women	up to 36,570 European ancestry men, 30,172 European ancestry women, 915 Filipino ancestry men, 735 Filipino ancestry women, 2,351 African American/Afro-Caribbean ancestry men, 6,258 African American/Afro-Caribbean ancestry women, 2,285 South Asian ancestry men, 506 South Asian ancestry women, 195 Seychellois ancestry men, 266 Seychellois ancestry women	3p21.1	PBRM1	PBRM1			55193			rs2276824-C	intron_variant	0	0.4342	3e-11	(EA)	0.0236	[0.017-0.031] unit increase	Affymetrix, Illumina, Perlegen [up to 2542447] (imputed)	N
33	rs9879090	3	52637486	rs2276824	2017-08-10	28443625	Justice AE	2017-04-26	Nat Commun	www.ncbi.nlm.nih.gov/pubmed/28443625	Genome-wide meta-analysis of 241,258 adults accounting for smoking behaviour identifies novel loci for obesity traits.	Waist-to-hip ratio adjusted for BMI (adjusted for smoking behaviour)	95,362 European ancestry women, 62,085 European ancestry men, 5,829 European ancestry individuals, 10,500 African American/Afro-Caribbean ancestry women, 2,706 African American/Afro-Caribbean ancestry men, 1,030 Indian Asian ancestry women, 7,648 Indian Asian ancestry men, 1,793 Filipino ancestry women, 2,944 Hispanic/Latino ancestry women, 1,764 Hispanic/Latino ancestry men	21,496 European ancestry women, 24,385 European ancestry men, 118,364 European ancestry individuals, 2,326 African American/Afro-Caribbean ancestry women, 855 African American/Afro-Caribbean ancestry men	3p21.1	PBRM1	PBRM1			55193			rs2276824-C	intron_variant	0	0.4352	2e-07		0.0193	[0.012-0.027] unit increase	Affymetrix, Illumina, Perlegen [up to 2800000] (imputed)	N
33	rs9879090	3	52637486	rs2276824	2017-08-10	28443625	Justice AE	2017-04-26	Nat Commun	www.ncbi.nlm.nih.gov/pubmed/28443625	Genome-wide meta-analysis of 241,258 adults accounting for smoking behaviour identifies novel loci for obesity traits.	Waist-to-hip ratio adjusted for BMI (adjusted for smoking behaviour)	95,362 European ancestry women, 62,085 European ancestry men, 5,829 European ancestry individuals, 10,500 African American/Afro-Caribbean ancestry women, 2,706 African American/Afro-Caribbean ancestry men, 1,030 Indian Asian ancestry women, 7,648 Indian Asian ancestry men, 1,793 Filipino ancestry women, 2,944 Hispanic/Latino ancestry women, 1,764 Hispanic/Latino ancestry men	21,496 European ancestry women, 24,385 European ancestry men, 118,364 European ancestry individuals, 2,326 African American/Afro-Caribbean ancestry women, 855 African American/Afro-Caribbean ancestry men	3p21.1	PBRM1	PBRM1			55193			rs2276824-C	intron_variant	0	0.4352	9e-06	(women)	0.0215	[0.012-0.031] unit increase	Affymetrix, Illumina, Perlegen [up to 2800000] (imputed)	N
33	rs9879090	3	52649748	rs13083798	2016-02-04	25673412	Shungin D	2015-02-12	Nature	www.ncbi.nlm.nih.gov/pubmed/25673412	New genetic loci link adipose and insulin biology to body fat distribution.	Waist-to-hip ratio adjusted for body mass index	up to 56,910 European ancestry men, up to 86,570 European ancestry women	up to 36,570 European ancestry men, 30,172 European ancestry women, 915 Filipino ancestry men, 735 Filipino ancestry women, 2,351 African American/Afro-Caribbean ancestry men, 6,258 African American/Afro-Caribbean ancestry women, 2,285 South Asian ancestry men, 506 South Asian ancestry women, 195 Seychellois ancestry men, 266 Seychellois ancestry women	3p21.1	PRBM1	PBRM1			55193			rs13083798-A	intron_variant	0	0.4894	5e-10	(EA, women)	0.0283	[0.019-0.037] unit increase	Affymetrix, Illumina, Perlegen [up to 2542447] (imputed)	N
33	rs9879090	3	52649748	rs13083798	2016-02-04	25673412	Shungin D	2015-02-12	Nature	www.ncbi.nlm.nih.gov/pubmed/25673412	New genetic loci link adipose and insulin biology to body fat distribution.	Waist-to-hip ratio adjusted for body mass index	up to 56,910 European ancestry men, up to 86,570 European ancestry women	up to 36,570 European ancestry men, 30,172 European ancestry women, 915 Filipino ancestry men, 735 Filipino ancestry women, 2,351 African American/Afro-Caribbean ancestry men, 6,258 African American/Afro-Caribbean ancestry women, 2,285 South Asian ancestry men, 506 South Asian ancestry women, 195 Seychellois ancestry men, 266 Seychellois ancestry women	3p21.1	PRBM1	PBRM1			55193			rs13083798-A	intron_variant	0	0.4899	2e-09	(women)	0.0268	[0.018-0.036] unit increase	Affymetrix, Illumina, Perlegen [up to 2542447] (imputed)	N
33	rs9879090	3	52649748	rs13083798	2016-02-04	25673412	Shungin D	2015-02-12	Nature	www.ncbi.nlm.nih.gov/pubmed/25673412	New genetic loci link adipose and insulin biology to body fat distribution.	Waist-to-hip ratio adjusted for body mass index	up to 56,910 European ancestry men, up to 86,570 European ancestry women	up to 36,570 European ancestry men, 30,172 European ancestry women, 915 Filipino ancestry men, 735 Filipino ancestry women, 2,351 African American/Afro-Caribbean ancestry men, 6,258 African American/Afro-Caribbean ancestry women, 2,285 South Asian ancestry men, 506 South Asian ancestry women, 195 Seychellois ancestry men, 266 Seychellois ancestry women	3p21.1	PRBM1	PBRM1			55193			rs13083798-A	intron_variant	0	0.4903	4e-11	(EA)	0.0227	[0.016-0.029] unit increase	Affymetrix, Illumina, Perlegen [up to 2542447] (imputed)	N
33	rs9879090	3	52649748	rs13083798	2016-02-04	25673412	Shungin D	2015-02-12	Nature	www.ncbi.nlm.nih.gov/pubmed/25673412	New genetic loci link adipose and insulin biology to body fat distribution.	Waist-to-hip ratio adjusted for body mass index	up to 56,910 European ancestry men, up to 86,570 European ancestry women	up to 36,570 European ancestry men, 30,172 European ancestry women, 915 Filipino ancestry men, 735 Filipino ancestry women, 2,351 African American/Afro-Caribbean ancestry men, 6,258 African American/Afro-Caribbean ancestry women, 2,285 South Asian ancestry men, 506 South Asian ancestry women, 195 Seychellois ancestry men, 266 Seychellois ancestry women	3p21.1	PRBM1	PBRM1			55193			rs13083798-A	intron_variant	0	0.4929	7e-11		0.0218	[0.015-0.028] unit increase	Affymetrix, Illumina, Perlegen [up to 2542447] (imputed)	N
33	rs9879090	3	52649748	rs13083798	2017-08-10	28443625	Justice AE	2017-04-26	Nat Commun	www.ncbi.nlm.nih.gov/pubmed/28443625	Genome-wide meta-analysis of 241,258 adults accounting for smoking behaviour identifies novel loci for obesity traits.	Waist-to-hip ratio adjusted for BMI (adjusted for smoking behaviour)	95,362 European ancestry women, 62,085 European ancestry men, 5,829 European ancestry individuals, 10,500 African American/Afro-Caribbean ancestry women, 2,706 African American/Afro-Caribbean ancestry men, 1,030 Indian Asian ancestry women, 7,648 Indian Asian ancestry men, 1,793 Filipino ancestry women, 2,944 Hispanic/Latino ancestry women, 1,764 Hispanic/Latino ancestry men	21,496 European ancestry women, 24,385 European ancestry men, 118,364 European ancestry individuals, 2,326 African American/Afro-Caribbean ancestry women, 855 African American/Afro-Caribbean ancestry men	3p21.1	PRBM1	PBRM1			55193			rs13083798-A	intron_variant	0	0.4986	1e-08		0.0198	[0.013-0.027] unit increase	Affymetrix, Illumina, Perlegen [up to 2800000] (imputed)	N
33	rs9879090	3	52649748	rs13083798	2017-08-10	28443625	Justice AE	2017-04-26	Nat Commun	www.ncbi.nlm.nih.gov/pubmed/28443625	Genome-wide meta-analysis of 241,258 adults accounting for smoking behaviour identifies novel loci for obesity traits.	Waist-to-hip ratio adjusted for BMI (adjusted for smoking behaviour)	95,362 European ancestry women, 62,085 European ancestry men, 5,829 European ancestry individuals, 10,500 African American/Afro-Caribbean ancestry women, 2,706 African American/Afro-Caribbean ancestry men, 1,030 Indian Asian ancestry women, 7,648 Indian Asian ancestry men, 1,793 Filipino ancestry women, 2,944 Hispanic/Latino ancestry women, 1,764 Hispanic/Latino ancestry men	21,496 European ancestry women, 24,385 European ancestry men, 118,364 European ancestry individuals, 2,326 African American/Afro-Caribbean ancestry women, 855 African American/Afro-Caribbean ancestry men	3p21.1	PRBM1	PBRM1			55193			rs13083798-A	intron_variant	0	0.4986	7e-06	(women)	0.0204	[0.012-0.029] unit increase	Affymetrix, Illumina, Perlegen [up to 2800000] (imputed)	N
33	rs12489732	3	52718280	rs10865974	2015-04-28	23092984	Goes FS	2012-10-23	Transl Psychiatry	www.ncbi.nlm.nih.gov/pubmed/23092984	Genome-wide association of mood-incongruent psychotic bipolar disorder.	Bipolar disorder with mood-incongruent psychosis	2,196 European and other ancestry cases, 8,148 European and other ancestry controls	NA	3p21.1	GNL3, PBRM1	PBRM1			55193			rs10865974-?	intron_variant	0	NR	2e-06		1.19	[NR]	Affymetrix, Illumina [~ 2500000] (imputed)	N
33	rs6778735	3	52720080	rs1108842	2012-05-10	22479202	Dastani Z	2012-03-29	PLoS Genet	www.ncbi.nlm.nih.gov/pubmed/22479202	Novel loci for adiponectin levels and their influence on type 2 diabetes and metabolic traits: a multi-ethnic meta-analysis of 45,891 individuals.	Adiponectin levels	29,347 European ancestry individuals	10,536 European ancestry individuals	3p21.1	GNL3	GNL3			26354			rs1108842-C	5_prime_UTR_variant	0	0.5	1e-13		0.03	[0.022-0.038] unit increase	Affymetrix, Illumina [NR] (imputed)	N
33	rs12489732	3	52721305	rs11177	2012-09-12	22763110	Loughlin	2012-07-03	Lancet	www.ncbi.nlm.nih.gov/pubmed/22763110	Identification of new susceptibility loci for osteoarthritis (arcOGEN): a genome-wide association study.	Osteoarthritis	7,410 European ancestry cases, 11,009 European ancestry controls	7,473 European ancestry cases, 42,938 European ancestry controls	3p21.1	GNL3, GLT8D1	GNL3			26354			rs11177-A	missense_variant	0	0.38	5e-09		1.09	[1.06-1.12]	Illumina [485491]	N
33	rs6778735	3	52814256	rs2302417	2017-05-11	28072414	Charney AW	2017-01-10	Transl Psychiatry	www.ncbi.nlm.nih.gov/pubmed/28072414	Evidence for genetic heterogeneity between clinical subtypes of bipolar disorder.	Bipolar disorder	13,903 European ancestry cases, 19,279 European ancestry controls.	NA	3p21.1	NR	ITIH1			3697			rs2302417-?	non_coding_transcript_exon_variant	0	NR	3e-09		1.11		Affymetrix, Illumina [8837380] (imputed)	N
33	rs6778735	3	52815905	rs2710323	2014-05-03	24166486	Sleiman P	2013-10-29	Sci Rep	www.ncbi.nlm.nih.gov/pubmed/24166486	GWAS meta analysis identifies TSNARE1 as a novel Schizophrenia / Bipolar susceptibility locus.	Schizophrenia, schizoaffective disorder or bipolar disorder	11,985 European, African American, Asian, other and unknown ancestry schizophrenia cases, 377 European, African American, Asian, other and unknown ancestry schizoaffective disorder cases, 1,032 bipolar disorder cases, 34,676 European, African American, Asian, other and unknown ancestry controls	2652 individuals	3p21.1	ITIH1	ITIH1			3697			rs2710323-?	intron_variant	0	0.466	3e-08				Affymetrix, Illumina [NR] (imputed)	N
33	rs6778735	3	52815905	rs2710323	2015-04-30	25173105	Gharahkhani P	2014-08-31	Nat Genet	www.ncbi.nlm.nih.gov/pubmed/25173105	Common variants near ABCA1, AFAP1 and GMDS confer risk of primary open-angle glaucoma.	Glaucoma (primary open-angle)	1,155 European ancestry cases, 1,922 European ancestry controls	3,548 European ancestry cases, 9,496 European ancestry controls	3p21.1	ITIH1	ITIH1			3697			rs2710323-T	intron_variant	0	0.42	5e-06		1.14	[NR]	Illumina [7594768] (imputed)	N
33	rs6778735	3	52815905	rs2710323	2016-01-27	25673413	Locke AE	2015-02-12	Nature	www.ncbi.nlm.nih.gov/pubmed/25673413	Genetic studies of body mass index yield new insights for obesity biology.	Body mass index	up to 104,666 European ancestry male individuals, up to 132,115 European ancestry female individuals, 370 African American male individuals, 517 African American female individuals, 512 Hispanic male individuals, 764 Hispanic female individuals	up to 48,274 European ancestry male individuals, up to 39,864 European ancestry female individuals, 2,441 African American or Afro-Caribbean male individuals, 6,314 African American or Afro-Caribbean female individuals, 919 Filipino male individuals, 828 Filipino female individuals, 205 Seychelles male individuals, 287 Seychelles female individuals, 2,964 South Asian ancestry male individuals, 65…	3p21.1	ITIH1	ITIH1			3697			rs2710323-C	intron_variant	0	0.491	9e-06		0.013	[0.0073-0.0187] kg/m2 increase	Affymetrix, Illumina [2550021]	N
33	rs12489732	3	52821011	rs1042779	2009-05-14	19416921	Scott LJ	2009-05-05	Proc Natl Acad Sci U S A	www.ncbi.nlm.nih.gov/pubmed/19416921	Genome-wide association and meta-analysis of bipolar disorder in individuals of European ancestry.	Bipolar disorder	3,683 European ancestry cases, 14,507 European ancestry controls	NA	3p21.1	ITIH1, NEK4	ITIH1			3697			rs1042779-A	missense_variant	0	0.63	2e-07		1.19	[1.11-1.27]	Affymetrix, Illumina [2366197] (imputed)	N
33	rs12489732	3	52831701	rs2240919	2015-09-24	25282103	Wood AR	2014-10-05	Nat Genet	www.ncbi.nlm.nih.gov/pubmed/25282103	Defining the role of common variation in the genomic and biological architecture of adult human height.	Height	253,288 European ancestry individuals	80,067 European ancestry individuals	3p21.1	ITIH3	ITIH3			3699			rs2240919-C	intron_variant	0	0.658	5e-17		0.027	[0.021-0.033] unit increase	Affymetrix, Illumina, Perlegen [2550858] (imputed)	N
33	rs12489732	3	52833219	rs2535629	2013-06-06	23453885	Smoller JW	2013-02-27	Lancet	www.ncbi.nlm.nih.gov/pubmed/23453885	Identification of risk loci with shared effects on five major psychiatric disorders: a genome-wide analysis.	Autism spectrum disorder, attention deficit-hyperactivity disorder, bipolar disorder, major depressive disorder, and schizophrenia (combined)	6,990 European ancestry Bipolar disorder cases, 9,227 European ancestry Major depressive disorder cases, 9,379 European ancestry Schizophrenia cases, 161 European ancestry Autism spectrum disorder cases, 4,788 European ancestry Autism spectrum disorder trio cases, 840 European ancestry Attention deficit-hyperactivity disorder cases, 1,947 European ancestry Attention defcit-hyperactivity disorder …	NA	3p21.1	ITIH3	ITIH3			3699			rs2535629-?	intron_variant	0	0.651	3e-12		1.1	[1.07-1.12]	NR [1252901] (imputed)	N
33	rs12489732	3	52835354	rs736408	2011-10-19	21926972	Sklar P	2011-09-18	Nat Genet	www.ncbi.nlm.nih.gov/pubmed/21926972	Large-scale genome-wide association analysis of bipolar disorder identifies a new susceptibility locus near ODZ4.	Bipolar disorder	7,481 European ancestry cases, 9,250 European ancestry controls	4,496 European ancestry cases, 42,422 European ancestry controls	3p21.1	PHF7, NT5DC2, MUSTN1, LOC440957, GNL3, GLYCTK, GLT8D1, DNAH1, BAP1, ALAS1, ITIH3, ITIH4, PRKCD, ITIH1, NEK4, PBRM1, WDR82, TWF2, TNNC1, TMEM110, TLR9, SPCS1, SNORD69, NISCH, STAB1, SNORD19, SNORD19B, SFMBT1, SEMA3G, RFT1, PPM1M	ITIH3			3699			rs736408-C	intron_variant	0	NR	2e-06		1.1	[NR]	Affymetrix, Illumina [2415422] (imputed)	N
33	rs12489732	3	52838402	rs4687552	2014-03-18	23974872	Ripke S	2013-08-25	Nat Genet	www.ncbi.nlm.nih.gov/pubmed/23974872	Genome-wide association analysis identifies 13 new risk loci for schizophrenia.	Schizophrenia	5,001 European ancestry cases, 6,243 European ancestry controls, 8,832 cases, 12,067 controls	4,801 European ancestry cases, 4,741 European ancestry controls, 2,612 European and unknown ancestry cases, 15,021 European and unknown ancestry controls, 581 trios	3p21.1	PHF7, NT5DC2, MUSTN1, GNL3, GLYCTK, GLT8D1, DNAH1, BAP1, ALAS1, ITIH3, ITIH4, ALDOAP1, C3orf78, ITIH1, MIR135A1, MIRLET7G, NEK4, PBRM1, WDR82, TWF2, TNNC1, TMEM110, TLR9, SPCS1, NISCH, STAB1, SFMBT1, SEMA3G, RFT1, PPM1M	ITIH3			3699			rs4687552-T	non_coding_transcript_exon_variant	0	0.641	1e-08		1.086	[1.06-1.11]	Affymetrix, Illumina [9871789]	N
33	rs6778735	3	52845105	rs2535627	2015-04-16	25056061	Ripke S	2014-07-22	Nature	www.ncbi.nlm.nih.gov/pubmed/25056061	Biological insights from 108 schizophrenia-associated genetic loci.	Schizophrenia	32,405 European ancestry cases, 42,221 European ancestry controls, 1,235 European ancestry cases and 1,235 European ancestry controls from 1235 parent-offspring trios, 1,836 East Asian ancestry cases, 3,383 East Asian ancestry controls	1,513 European ancestry cases, 66,236 European ancestry controls	3p21.1	GLT8D1, GNL3, ITIH1, ITIH3, ITIH4, MUSTN1, NEK4, NISCH, NT5DC2, PBRM1, SMIM4, SPCS1, STAB1, TMEM110, TMEM110-MUSTN1	ITIH3 - ITIH4	3699	3700		2080	1901	rs2535627-T	downstream_gene_variant	1	0.529	4e-11		1.071	[1.049-1.092]	Affymetrix, Illumina [9005918] (imputed)	N
33	rs6778735	3	52845105	rs2535627	2016-07-23	26198764	Goes FS	2015-07-21	Am J Med Genet B Neuropsychiatr Genet	www.ncbi.nlm.nih.gov/pubmed/26198764	Genome-wide association study of schizophrenia in Ashkenazi Jews.	Schizophrenia	592 Ashkenazi Jewish ancestry cases, 505 Ashkenazi Jewish ancestry controls, 36,989 cases, 113,075 controls	NA	3p21.1	NR	ITIH3 - ITIH4	3699	3700		2080	1901	rs2535627-T	downstream_gene_variant	1	NR	2e-11		1.07	[NR]	Illumina [7158791] (imputed)	N
33	rs7638524	3	52855229	rs2239547	2011-10-17	21926974	Ripke S	2011-09-18	Nat Genet	www.ncbi.nlm.nih.gov/pubmed/21926974	Genome-wide association study identifies five new schizophrenia loci.	Schizophrenia	9,394 European ancestry cases, 12,462 European ancestry controls	8,442 European ancestry cases, 21,397 European ancestry controls	3p21.1	ITIH3, ITIH4	ITIH4			3700			rs2239547-?	intron_variant	0	NR	6e-08		1.1	[1.06-1.14]	Affymetrix, Illumina [1252901] (imputed)	N
33	rs2336670	3	52859630	rs2535633	2014-11-27	24861553	Wen W	2014-05-26	Hum Mol Genet	www.ncbi.nlm.nih.gov/pubmed/24861553	Meta-analysis of genome-wide association studies in East Asian-ancestry populations identifies four new loci for body mass index.	Body mass index	82,438 East Asian ancestry individuals, 4,301 South East Asian ancestry individuals	Up to 47,352 East Asian ancestry individuals	3p21.1	ITIH4	ITIH4			3700			rs2535633-G	intron_variant	0	0.42	2e-10		0.0288	[0.02-0.038] unit increase	Affymetrix, Illumina [~ 2500000] (imputed)	N
33	rs36051354	3	53036206	rs2581794	2016-07-23	26198764	Goes FS	2015-07-21	Am J Med Genet B Neuropsychiatr Genet	www.ncbi.nlm.nih.gov/pubmed/26198764	Genome-wide association study of schizophrenia in Ashkenazi Jews.	Schizophrenia	592 Ashkenazi Jewish ancestry cases, 505 Ashkenazi Jewish ancestry controls, 36,989 cases, 113,075 controls	NA	3p21.1	NR	LOC105377135, SFMBT1			105377135, 51460			rs2581794-A	intron_variant	0	NR	3e-07		1.06	[NR]	Illumina [7158791] (imputed)	N
33	rs36051354	3	53062661	rs9847710	2013-02-12	23128233	Jostins L	2012-11-01	Nature	www.ncbi.nlm.nih.gov/pubmed/23128233	Host-microbe interactions have shaped the genetic architecture of inflammatory bowel disease.	Ulcerative colitis	Up to 12,924 European ancestry cases, up to 21,442 European ancestry controls	Up to 25,683 European ancestry cases, up to 17,015 European ancestry controls	3p21.1	PRKCD, ITIH4	SFMBT1, LOC105377135			51460, 105377135			rs9847710-C	intron_variant	0	0.416	1e-08		1.064	[1.027-1.102]	Affymetrix, Illumina [1230000] (imputed)	N
33	rs36051354	3	53062661	rs9847710	2016-07-24	26192919	Liu JZ	2015-07-20	Nat Genet	www.ncbi.nlm.nih.gov/pubmed/26192919	Association analyses identify 38 susceptibility loci for inflammatory bowel disease and highlight shared genetic risk across populations.	Ulcerative colitis	6,968 European ancestry cases, 20,464 European ancestry controls	10,679 European ancestry cases, 26,715 European ancestry controls, 397 Iranian ancestry cases, 342 Iranian ancestry controls, 1,239 Indian ancestry cases, 990 Indian ancestry controls, 1,134 East Asian ancestry cases, 3,719 East Asian ancestry controls	3p21.1	NR	SFMBT1, LOC105377135			51460, 105377135			rs9847710-G	intron_variant	0	0.4118	3e-07	(EA)	1.06757	[1.04-1.09]	Affymetrix, Illumina [~ 9000000] (imputed)	N
33	rs36051354	3	53100214	rs6770152	2013-03-15	23263486	Kottgen A	2012-12-23	Nat Genet	www.ncbi.nlm.nih.gov/pubmed/23263486	Genome-wide association analyses identify 18 new loci associated with serum urate concentrations.	Urate levels	49,825 European ancestry males, 60,522 European ancestry females	Up to 32,813 European ancestry individuals	3p21.1	MUSTN1, SFMBT1	SERBP1P3 - RFT1	553148	91869		1081	4953	rs6770152-T	intron_variant	1	0.58	3e-16		0.044	[0.034-0.054] mg/dl decrease	Affymetrix, Illumina, Perlegen [2450547] (imputed)	N
36	rs11720523	3	71483084	rs62246017	2016-11-17	26829030	Asgari MM	2016-01-29	J Invest Dermatol	www.ncbi.nlm.nih.gov/pubmed/26829030	Identification of Susceptibility Loci for Cutaneous Squamous Cell Carcinoma.	Squamous cell carcinoma	6,891 European ancestry cases, 54,566 European ancestry controls	810 European ancestry cases, 5,600 European ancestry controls	3p13	FOXP1	FOXP1			27086			rs62246017-A	intron_variant	0	0.33	1e-08		1.11	[1.07-1.16]	Affymetrix [9610468] (imputed)	N
36	rs56151722	3	71528943	rs12487658	2016-12-08	26835600	Hu Y	2016-02-02	Nat Commun	www.ncbi.nlm.nih.gov/pubmed/26835600	GWAS of 89,283 individuals identifies genetic variants associated with self-reporting of being a morning person.	Morning vs. evening chronotype	38,937 European ancestry morning chronotype individuals, 50,346 European ancestry evening chronotype individuals	NA	3p13	NR	FOXP1			27086			rs12487658-?	intron_variant	0	NR	7e-06				Illumina [7427422] (imputed)	N
36	rs11720523	3	71579022	rs7610856	2017-02-24	27225129	Okbay A	2016-05-26	Nature	www.ncbi.nlm.nih.gov/pubmed/27225129	Genome-wide association study identifies 74 loci associated with educational attainment.	Educational attainment (years of education)	405,072 European ancestry individuals	NA	3p13	NR	FOXP1			27086			rs7610856-A	intron_variant	0	0.4267	3e-08		0.0124793	NR unit increase	Affymetrix, Illumina, Perlegen [~ 9300000] (imputed)	N
39	rs11720236	3	127143885	rs9755467	2017-02-24	27225129	Okbay A	2016-05-26	Nature	www.ncbi.nlm.nih.gov/pubmed/27225129	Genome-wide association study identifies 74 loci associated with educational attainment.	Educational attainment (years of education)	405,072 European ancestry individuals	NA	3q21.3	NR	LOC101927123 - LINC01471	101927123	101927149		34372	72559	rs9755467-T	intergenic_variant	1	0.1565	5e-10		0.0190077	NR unit increase	Affymetrix, Illumina, Perlegen [~ 9300000] (imputed)	N
39	rs11720236	3	127144993	rs9289301	2015-05-08	25201988	Rietveld CA	2014-09-08	Proc Natl Acad Sci U S A	www.ncbi.nlm.nih.gov/pubmed/25201988	Common genetic variants associated with cognitive performance identified using the proxy-phenotype method.	Educational attainment	106,736 European ancestry individuals	NA	3q21.3	intergenic	LOC101927123 - LINC01471	101927123	101927149		35480	71451	rs9289301-C	intergenic_variant	1	0.155	8e-07		0.031	[NR] unit increase	Affymetrix, Illumina [NR] (imputed)	N
46	rs34592089	4	102865304	rs13126505	2013-02-12	23128233	Jostins L	2012-11-01	Nature	www.ncbi.nlm.nih.gov/pubmed/23128233	Host-microbe interactions have shaped the genetic architecture of inflammatory bowel disease.	Crohn's disease	Up to 12,924 European ancestry cases, up to 21,442 European ancestry controls	Up to 25,683 European ancestry cases, up to 17,015 European ancestry controls	4q24	intergenic	BANK1			55024			rs13126505-A	intron_variant	0	0.096	2e-12		1.172	[1.10-1.248]	Affymetrix, Illumina [1230000] (imputed)	N
46	rs34592089	4	102865304	rs13126505	2016-07-24	26192919	Liu JZ	2015-07-20	Nat Genet	www.ncbi.nlm.nih.gov/pubmed/26192919	Association analyses identify 38 susceptibility loci for inflammatory bowel disease and highlight shared genetic risk across populations.	Inflammatory bowel disease	12,882 European ancestry cases, 21,770 European ancestry controls	25,273 European ancestry cases, 26,715 European ancestry controls, 548 Iranian ancestry cases, 342 Iranian ancestry control, 1,423 Indian ancestry cases, 990 Indian ancestry controls, 2,824 East Asian ancestry cases, 3,719 East Asian ancestry controls	4q24	NR	BANK1			55024			rs13126505-A	intron_variant	0	0.06306	1e-10	(EA)	1.13715	[1.1-1.18]	Affymetrix, Illumina [~ 9000000] (imputed)	N
46	rs34592089	4	102865304	rs13126505	2017-06-02	28067908	de Lange KM	2017-01-09	Nat Genet	www.ncbi.nlm.nih.gov/pubmed/28067908	Genome-wide association study implicates immune activation of multiple integrin genes in inflammatory bowel disease.	Crohn's disease	12,194 European and unknown ancestry cases, 28,072 European and unknown ancestry controls	NA	4q24	NFKB1, SLC39A8, BANK1	BANK1			55024			rs13126505-?	intron_variant	0		4e-08				Illumina [9560910] (imputed)	N
46	rs34592089	4	102865304	rs13126505	2017-06-02	28067908	de Lange KM	2017-01-09	Nat Genet	www.ncbi.nlm.nih.gov/pubmed/28067908	Genome-wide association study implicates immune activation of multiple integrin genes in inflammatory bowel disease.	Inflammatory bowel disease	25,042 European and unknown ancestry cases, 34,915 European and unknown ancestry controls	NA	4q24	NFKB1, SLC39A8, BANK1	BANK1			55024			rs13126505-?	intron_variant	0		4e-06				Illumina [9725440] (imputed)	N
46	rs34592089	4	102926923	rs34592089	2016-07-24	26192919	Liu JZ	2015-07-20	Nat Genet	www.ncbi.nlm.nih.gov/pubmed/26192919	Association analyses identify 38 susceptibility loci for inflammatory bowel disease and highlight shared genetic risk across populations.	Crohn's disease	5,956 European ancestry cases, 14,927 European ancestry controls	14,594 European ancestry cases, 26,715 European ancestry controls, 151 Iranian ancestry cases, 342 Iranian ancestry controls, 184 Indian ancestry cases, 990 Indian ancestry controls, 1,690 East Asian ancestry cases, 3,719 East Asian ancestry controls	4q24	NR	BANK1			55024			rs34592089-?	intron_variant	0	NR	1e-15	(EA)			Affymetrix, Illumina [~ 9000000] (imputed)	N
46	rs13107325	4	103146890	rs35518360	2015-04-16	25056061	Ripke S	2014-07-22	Nature	www.ncbi.nlm.nih.gov/pubmed/25056061	Biological insights from 108 schizophrenia-associated genetic loci.	Schizophrenia	32,405 European ancestry cases, 42,221 European ancestry controls, 1,235 European ancestry cases and 1,235 European ancestry controls from 1235 parent-offspring trios, 1,836 East Asian ancestry cases, 3,383 East Asian ancestry controls	1,513 European ancestry cases, 66,236 European ancestry controls	4q24	SLC39A8	BANK1 - SLC39A8	55024	64116		150921	25308	rs35518360-T	intergenic_variant	1	0.078	8e-15		1.16686	[1.12-1.21]	Affymetrix, Illumina [9005918] (imputed)	N
46	rs13107325	4	103188709	rs13107325	2010-11-17	20935630	Speliotes EK	2010-10-10	Nat Genet	www.ncbi.nlm.nih.gov/pubmed/20935630	Association analyses of 249,796 individuals reveal 18 new loci associated with body mass index.	Body mass index	Up to 123,865 European ancestry individuals	Up to 125,931 European ancestry individuals	4q24	SLC39A8	SLC39A8			64116			rs13107325-T	missense_variant	0	0.07	2e-13		0.19	[0.11-0.27] kg/m2 increase	Affymetrix, Illumina, Perlegen [~ 2800000] (imputed)	N
46	rs13107325	4	103188709	rs13107325	2011-10-11	21909110	Wain LV	2011-09-11	Nat Genet	www.ncbi.nlm.nih.gov/pubmed/21909110	Genome-wide association study identifies six new loci influencing pulse pressure and mean arterial pressure.	Blood pressure	74,064 European ancestry individuals	48,607 European ancestry individuals	4q24	SLC39A8	SLC39A8			64116			rs13107325-T	missense_variant	0	0.12	1e-10	(Mean Arterial Pressure)	0.633	[0.44-0.82] mmHg decrease	Affymetrix, Illumina, Perlegen [NR] (imputed)	N
46	rs13107325	4	103188709	rs13107325	2011-10-21	21909115	Ehret GB	2011-09-11	Nature	www.ncbi.nlm.nih.gov/pubmed/21909115	Genetic variants in novel pathways influence blood pressure and cardiovascular disease risk.	Diastolic blood pressure	69,395 European ancestry individuals	Up to 133,361 European ancestry individuals	4q24	SLC39A8	SLC39A8			64116			rs13107325-T	missense_variant	0	0.05	2e-17		0.684	[NR] mmHg decrease	Affymetrix, Illumina [~ 2500000] (imputed)	N
46	rs13107325	4	103188709	rs13107325	2011-10-21	21909115	Ehret GB	2011-09-11	Nature	www.ncbi.nlm.nih.gov/pubmed/21909115	Genetic variants in novel pathways influence blood pressure and cardiovascular disease risk.	Hypertension	69,395 European ancestry individuals	Up to 133,361 European ancestry individuals	4q24	SLC39A8	SLC39A8			64116			rs13107325-T	missense_variant	0	0.05	5e-07		0.105	[NR] unit decrease	Affymetrix, Illumina [~ 2500000] (imputed)	N
46	rs13107325	4	103188709	rs13107325	2011-10-21	21909115	Ehret GB	2011-09-11	Nature	www.ncbi.nlm.nih.gov/pubmed/21909115	Genetic variants in novel pathways influence blood pressure and cardiovascular disease risk.	Systolic blood pressure	69,395 European ancestry individuals	Up to 133,361 European ancestry individuals	4q24	SLC39A8	SLC39A8			64116			rs13107325-T	missense_variant	0	0.05	3e-14		0.981	[NR] mmHg decrease	Affymetrix, Illumina [~ 2500000] (imputed)	N
46	rs13107325	4	103188709	rs13107325	2012-01-25	20686565	Teslovich TM	2010-08-05	Nature	www.ncbi.nlm.nih.gov/pubmed/20686565	Biological, clinical and population relevance of 95 loci for blood lipids.	HDL cholesterol	99,900 European ancestry individuals	NA	4q24	SLC39A8	SLC39A8			64116			rs13107325-T	missense_variant	0	0.07	7e-11		0.84	[0.53-1.15] mg/dL decrease	Affymetrix, Illumina, Perlegen [~ 2600000] (imputed)	N
46	rs13107325	4	103188709	rs13107325	2014-05-12	24097068	Willer CJ	2013-10-06	Nat Genet	www.ncbi.nlm.nih.gov/pubmed/24097068	Discovery and refinement of loci associated with lipid levels.	HDL cholesterol	94,595 European ancestry individuals	93,982 European ancestry individuals	4q24	SLC39A8	SLC39A8			64116			rs13107325-T	missense_variant	0	0.08	1e-15		0.071	[NR] unit decrease	NR [NR] (imputed)	N
46	rs13107325	4	103188709	rs13107325	2016-01-27	25673413	Locke AE	2015-02-12	Nature	www.ncbi.nlm.nih.gov/pubmed/25673413	Genetic studies of body mass index yield new insights for obesity biology.	Body mass index	up to 104,666 European ancestry male individuals, up to 132,115 European ancestry female individuals, 370 African American male individuals, 517 African American female individuals, 512 Hispanic male individuals, 764 Hispanic female individuals	up to 48,274 European ancestry male individuals, up to 39,864 European ancestry female individuals, 2,441 African American or Afro-Caribbean male individuals, 6,314 African American or Afro-Caribbean female individuals, 919 Filipino male individuals, 828 Filipino female individuals, 205 Seychelles male individuals, 287 Seychelles female individuals, 2,964 South Asian ancestry male individuals, 65…	4q24	SLC39A8	SLC39A8			64116			rs13107325-T	missense_variant	0	0.071	3e-07	(EA, women)	0.045	[0.028-0.062] kg/m2 increase	Affymetrix, Illumina [2550021]	N
46	rs13107325	4	103188709	rs13107325	2016-01-27	25673413	Locke AE	2015-02-12	Nature	www.ncbi.nlm.nih.gov/pubmed/25673413	Genetic studies of body mass index yield new insights for obesity biology.	Body mass index	up to 104,666 European ancestry male individuals, up to 132,115 European ancestry female individuals, 370 African American male individuals, 517 African American female individuals, 512 Hispanic male individuals, 764 Hispanic female individuals	up to 48,274 European ancestry male individuals, up to 39,864 European ancestry female individuals, 2,441 African American or Afro-Caribbean male individuals, 6,314 African American or Afro-Caribbean female individuals, 919 Filipino male individuals, 828 Filipino female individuals, 205 Seychelles male individuals, 287 Seychelles female individuals, 2,964 South Asian ancestry male individuals, 65…	4q24	SLC39A8	SLC39A8			64116			rs13107325-T	missense_variant	0	0.072	1e-12		0.047	[0.034-0.06] kg/m2 increase	Affymetrix, Illumina [2550021]	N
46	rs13107325	4	103188709	rs13107325	2016-01-27	25673413	Locke AE	2015-02-12	Nature	www.ncbi.nlm.nih.gov/pubmed/25673413	Genetic studies of body mass index yield new insights for obesity biology.	Body mass index	up to 104,666 European ancestry male individuals, up to 132,115 European ancestry female individuals, 370 African American male individuals, 517 African American female individuals, 512 Hispanic male individuals, 764 Hispanic female individuals	up to 48,274 European ancestry male individuals, up to 39,864 European ancestry female individuals, 2,441 African American or Afro-Caribbean male individuals, 6,314 African American or Afro-Caribbean female individuals, 919 Filipino male individuals, 828 Filipino female individuals, 205 Seychelles male individuals, 287 Seychelles female individuals, 2,964 South Asian ancestry male individuals, 65…	4q24	SLC39A8	SLC39A8			64116			rs13107325-T	missense_variant	0	0.072	2e-12	(EA)	0.048	[0.034-0.061] kg/m2 increase	Affymetrix, Illumina [2550021]	N
46	rs13107325	4	103188709	rs13107325	2016-01-27	25673413	Locke AE	2015-02-12	Nature	www.ncbi.nlm.nih.gov/pubmed/25673413	Genetic studies of body mass index yield new insights for obesity biology.	Body mass index	up to 104,666 European ancestry male individuals, up to 132,115 European ancestry female individuals, 370 African American male individuals, 517 African American female individuals, 512 Hispanic male individuals, 764 Hispanic female individuals	up to 48,274 European ancestry male individuals, up to 39,864 European ancestry female individuals, 2,441 African American or Afro-Caribbean male individuals, 6,314 African American or Afro-Caribbean female individuals, 919 Filipino male individuals, 828 Filipino female individuals, 205 Seychelles male individuals, 287 Seychelles female individuals, 2,964 South Asian ancestry male individuals, 65…	4q24	SLC39A8	SLC39A8			64116			rs13107325-T	missense_variant	0	0.074	3e-09	(EA, men)	0.053	[0.035-0.07] kg/m2 increase	Affymetrix, Illumina [2550021]	N
46	rs13107325	4	103188709	rs13107325	2016-07-23	26198764	Goes FS	2015-07-21	Am J Med Genet B Neuropsychiatr Genet	www.ncbi.nlm.nih.gov/pubmed/26198764	Genome-wide association study of schizophrenia in Ashkenazi Jews.	Schizophrenia	592 Ashkenazi Jewish ancestry cases, 505 Ashkenazi Jewish ancestry controls, 36,989 cases, 113,075 controls	NA	4q24	NR	SLC39A8			64116			rs13107325-T	missense_variant	0	NR	2e-12		1.16	[NR]	Illumina [7158791] (imputed)	N
46	rs13107325	4	103188709	rs13107325	2016-09-28	26604143	Felix JF	2015-11-24	Hum Mol Genet	www.ncbi.nlm.nih.gov/pubmed/26604143	Genome-wide association analysis identifies three new susceptibility loci for childhood body mass index.	Childhood body mass index	34,744 European ancestry children	11,313 European ancestry children	4q24	NR	SLC39A8			64116			rs13107325-T	missense_variant	0	NR	1e-08				Affymetrix, Illumina [2499691] (imputed)	N
46	rs13107325	4	103188709	rs13107325	2016-09-28	26604143	Felix JF	2015-11-24	Hum Mol Genet	www.ncbi.nlm.nih.gov/pubmed/26604143	Genome-wide association analysis identifies three new susceptibility loci for childhood body mass index.	Childhood body mass index	34,744 European ancestry children	11,313 European ancestry children	4q24	SLC39A8	SLC39A8			64116			rs13107325-T	missense_variant	0	0.07	4e-07		0.081	[0.05-0.112] unit increase	Affymetrix, Illumina [2499691] (imputed)	N
46	rs13107325	4	103188709	rs13107325	2016-11-09	26908625	Johansson Ã…	2016-01-21	Hum Mol Genet	www.ncbi.nlm.nih.gov/pubmed/26908625	Genome-wide association and Mendelian randomization study of NT-proBNP in patients with acute coronary syndrome.	NT-proBNP levels in acute coronary syndrome	at least 3,691 European ancestry individuals, up to 29 Asian ancestry individuals, 20 African ancestry individuals	at least 5,404 European ancestry individuals, up to 54 Asian ancestry individuals, 33 African ancestry individuals	4q24	SLC39A8	SLC39A8			64116			rs13107325-T	missense_variant	0	0.078	6e-10		0.216	[0.15-0.28] ng/L increase	Illumina [10962468] (imputed)	N
46	rs13107325	4	103188709	rs13107325	2017-08-10	28443625	Justice AE	2017-04-26	Nat Commun	www.ncbi.nlm.nih.gov/pubmed/28443625	Genome-wide meta-analysis of 241,258 adults accounting for smoking behaviour identifies novel loci for obesity traits.	BMI (adjusted for smoking behaviour)	98,173 European ancestry women, 64,373 European ancestry men, 5,829 European ancestry individuals, 10,500 African American/Afro-Caribbean ancestry women, 2,706 African American/Afro-Caribbean ancestry men, 1,030 Indian Asian ancestry women, 7,648 Indian Asian ancestry men, 1,793 Filipino ancestry women, 2,944 Hispanic/Latino ancestry women, 1,764 Hispanic/Latino ancestry men	21,496 European ancestry women, 24,385 European ancestry men, 118,364 European ancestry individuals, 2,326 African American/Afro-Caribbean ancestry women, 855 African American/Afro-Caribbean ancestry men	4q24	SLC39A8	SLC39A8			64116			rs13107325-T	missense_variant	0	0.0737	3e-10		0.0469	[0.032-0.062] kg/m2 increase	Affymetrix, Illumina, Perlegen [up to 2800000] (imputed)	N
46	rs13107325	4	103188709	rs13107325	2017-08-10	28443625	Justice AE	2017-04-26	Nat Commun	www.ncbi.nlm.nih.gov/pubmed/28443625	Genome-wide meta-analysis of 241,258 adults accounting for smoking behaviour identifies novel loci for obesity traits.	BMI (adjusted for smoking behaviour)	98,173 European ancestry women, 64,373 European ancestry men, 5,829 European ancestry individuals, 10,500 African American/Afro-Caribbean ancestry women, 2,706 African American/Afro-Caribbean ancestry men, 1,030 Indian Asian ancestry women, 7,648 Indian Asian ancestry men, 1,793 Filipino ancestry women, 2,944 Hispanic/Latino ancestry women, 1,764 Hispanic/Latino ancestry men	21,496 European ancestry women, 24,385 European ancestry men, 118,364 European ancestry individuals, 2,326 African American/Afro-Caribbean ancestry women, 855 African American/Afro-Caribbean ancestry men	4q24	SLC39A8	SLC39A8			64116			rs13107325-T	missense_variant	0	0.0737	4e-09	(men)	0.0607	[0.041-0.081] kg/m2 increase	Affymetrix, Illumina, Perlegen [up to 2800000] (imputed)	N
46	rs13107325	4	103188709	rs13107325	2017-08-10	28443625	Justice AE	2017-04-26	Nat Commun	www.ncbi.nlm.nih.gov/pubmed/28443625	Genome-wide meta-analysis of 241,258 adults accounting for smoking behaviour identifies novel loci for obesity traits.	BMI in non-smokers	77,279 European ancestry women, 47,280 European ancestry men, 4,856 European ancestry individuals, 8,799 African American/Afro-Caribbean ancestry women, 1,803 African American/Afro-Caribbean ancestry men, 1,020 Indian Asian ancestry women, 6,691 Indian Asian ancestry men, 1,526 Filipino ancestry women, 2,469 Hispanic/Latino ancestry women, 1,318 Hispanic/Latino ancestry men	16,011 European ancestry women, 17,912 European ancestry men, 105,218 European ancestry individuals, 2,073 African American/Afro-Caribbean ancestry women, 647 African American/Afro-Caribbean ancestry men	4q24	SLC39A8	SLC39A8			64116			rs13107325-T	missense_variant	0	0.0737	1e-07		0.0449	[0.028-0.062] kg/m2 increase	Affymetrix, Illumina, Perlegen [up to 2800000] (imputed)	N
46	rs13107325	4	103188709	rs13107325	2017-08-10	28443625	Justice AE	2017-04-26	Nat Commun	www.ncbi.nlm.nih.gov/pubmed/28443625	Genome-wide meta-analysis of 241,258 adults accounting for smoking behaviour identifies novel loci for obesity traits.	BMI in non-smokers	77,279 European ancestry women, 47,280 European ancestry men, 4,856 European ancestry individuals, 8,799 African American/Afro-Caribbean ancestry women, 1,803 African American/Afro-Caribbean ancestry men, 1,020 Indian Asian ancestry women, 6,691 Indian Asian ancestry men, 1,526 Filipino ancestry women, 2,469 Hispanic/Latino ancestry women, 1,318 Hispanic/Latino ancestry men	16,011 European ancestry women, 17,912 European ancestry men, 105,218 European ancestry individuals, 2,073 African American/Afro-Caribbean ancestry women, 647 African American/Afro-Caribbean ancestry men	4q24	SLC39A8	SLC39A8			64116			rs13107325-T	missense_variant	0	0.0737	7e-07	(men)	0.0574	[0.035-0.08] kg/m2 increase	Affymetrix, Illumina, Perlegen [up to 2800000] (imputed)	N
46	rs13107325	4	103188709	rs13107325	2017-08-10	28443625	Justice AE	2017-04-26	Nat Commun	www.ncbi.nlm.nih.gov/pubmed/28443625	Genome-wide meta-analysis of 241,258 adults accounting for smoking behaviour identifies novel loci for obesity traits.	Body mass index (joint analysis main effects and smoking interaction)	98,173 European ancestry women, 64,373 European ancestry men, 5,829 European ancestry individuals, 10,500 African American/Afro-Caribbean ancestry women, 2,706 African American/Afro-Caribbean ancestry men, 1,030 Indian Asian ancestry women, 7,648 Indian Asian ancestry men, 1,793 Filipino ancestry women, 2,944 Hispanic/Latino ancestry women, 1,764 Hispanic/Latino ancestry men	21,496 European ancestry women, 24,385 European ancestry men, 118,364 European ancestry individuals, 2,326 African American/Afro-Caribbean ancestry women, 855 African American/Afro-Caribbean ancestry men	4q24	SLC39A8	SLC39A8			64116			rs13107325-T	missense_variant	0	0.0737	1e-08	(men)			Affymetrix, Illumina, Perlegen [up to 2800000] (imputed)	N
46	rs13107325	4	103188709	rs13107325	2017-08-10	28443625	Justice AE	2017-04-26	Nat Commun	www.ncbi.nlm.nih.gov/pubmed/28443625	Genome-wide meta-analysis of 241,258 adults accounting for smoking behaviour identifies novel loci for obesity traits.	Body mass index (joint analysis main effects and smoking interaction)	98,173 European ancestry women, 64,373 European ancestry men, 5,829 European ancestry individuals, 10,500 African American/Afro-Caribbean ancestry women, 2,706 African American/Afro-Caribbean ancestry men, 1,030 Indian Asian ancestry women, 7,648 Indian Asian ancestry men, 1,793 Filipino ancestry women, 2,944 Hispanic/Latino ancestry women, 1,764 Hispanic/Latino ancestry men	21,496 European ancestry women, 24,385 European ancestry men, 118,364 European ancestry individuals, 2,326 African American/Afro-Caribbean ancestry women, 855 African American/Afro-Caribbean ancestry men	4q24	SLC39A8	SLC39A8			64116			rs13107325-T	missense_variant	0	0.0737	2e-10				Affymetrix, Illumina, Perlegen [up to 2800000] (imputed)	N
46	rs13107325	4	103198082	rs13135092	2016-07-08	25961943	Surakka I	2015-05-11	Nat Genet	www.ncbi.nlm.nih.gov/pubmed/25961943	The impact of low-frequency and rare variants on lipid levels.	HDL cholesterol	up to 62,166 European ancestry individuals	NA	4q24	SLC39A8	SLC39A8			64116			rs13135092-A	intron_variant	0	0.97	3e-13		0.129	[0.094-0.164] s.d. increase	Affymetrix, Illumina, Perlegen [up to 9657952] (imputed)	N
46	rs13105581	4	103284865	rs13114738	2017-05-15	27790247	He L	2016-11-03	Front Genet	www.ncbi.nlm.nih.gov/pubmed/27790247	Pleiotropic Meta-Analyses of Longitudinal Studies Discover Novel Genetic Variants Associated with Age-Related Diseases.	Age-related disease endophenotypes	9,618 European ancestry individuals	19,796 European ancestry individuals	4q24	NR	RN7SL728P - LOC105377621	106481857	105377621		15017	54894	rs13114738-?	intron_variant	1	NR	1e-10				Affymetrix [NR]	N
46	rs13105581	4	103284865	rs13114738	2017-05-15	27790247	He L	2016-11-03	Front Genet	www.ncbi.nlm.nih.gov/pubmed/27790247	Pleiotropic Meta-Analyses of Longitudinal Studies Discover Novel Genetic Variants Associated with Age-Related Diseases.	Age-related diseases, mortality and associated endophenotypes	9,618 European ancestry individuals	19,796 European ancestry individuals	4q24	NR	RN7SL728P - LOC105377621	106481857	105377621		15017	54894	rs13114738-?	intron_variant	1	NR	8e-08				Affymetrix [NR]	N
47	rs2726513	4	106048360	rs1541374	2011-10-18	21946350	Soler Artigas M	2011-09-25	Nat Genet	www.ncbi.nlm.nih.gov/pubmed/21946350	Genome-wide association and large-scale follow up identifies 16 new loci influencing lung function.	Pulmonary function	48,201 European ancestry individuals	46,411 European ancestry individuals	4q24	TET2	LOC100288146 - TET2	100288146	54790		23209	18672	rs1541374-T	intergenic_variant	1	NR	6e-07	(FEV1)	0.026	[0.016-0.036] unit decrease	Affymetrix, Illumina [~ 2500000] (imputed)	N
47	rs1391438	4	106061534	rs7679673	2009-12-29	19767753	Eeles RA	2009-09-20	Nat Genet	www.ncbi.nlm.nih.gov/pubmed/19767753	Identification of seven new prostate cancer susceptibility loci through a genome-wide association study.	Prostate cancer	1,854 European ancestry cases, 1,894 European ancestry controls	19,879 cases and 18,761 controls of European, East Asian, African American, Latino, and Hawaiian ancestry	4q24	TET2	LOC100288146 - TET2	100288146	54790		36383	5498	rs7679673-?	intron_variant	1	0.55	3e-14		1.1	[1.06-1.14]	Illumina [541129]	N
47	rs1391438	4	106061534	rs7679673	2016-02-12	25939597	Berndt SI	2015-05-05	Nat Commun	www.ncbi.nlm.nih.gov/pubmed/25939597	Two susceptibility loci identified for prostate cancer aggressiveness.	Prostate cancer	4,600 European ancestry cases, 2,941 European ancestry controls	7,779 European ancestry cases, 7,623 European ancestry controls	4q24	TET2	LOC100288146 - TET2	100288146	54790		36383	5498	rs7679673-C	intron_variant	1	0.58	4e-09		1.12	[1.08-1.16]	Illumina [1531807] (imputed)	N
47	rs1391438	4	106061534	rs7679673	2016-07-15	26034056	Hoffmann TJ	2015-06-01	Cancer Discov	www.ncbi.nlm.nih.gov/pubmed/26034056	A large multi-ethnic genome-wide association study of prostate cancer identifies novel risk variants and substantial ethnic differences.	Prostate cancer	6,406 European ancestry cases, 601 African American cases, 288 East Asian ancestry cases, 488 Latino cases30,866 European ancestry controls, 1,650 African American controls, 2,938 East Asian ancestry controls, 3,141 Latino controls	4,599 European ancestry cases, 2,265 African American cases, 2,940 European ancestry controls, 2,414 African American controls	4q24	NR	LOC100288146 - TET2	100288146	54790		36383	5498	rs7679673-C	intron_variant	1	0.59	5e-08		1.12	[1.07-1.16]	Affymetrix [up to 19977088] (imputed)	N
47	rs1391438	4	106061534	rs7679673	2017-02-03	27197191	Fehringer G	2016-04-20	Cancer Res	www.ncbi.nlm.nih.gov/pubmed/27197191	Cross-cancer genome-wide analysis of lung, ovary, breast, prostate and colorectal cancer reveals novel pleiotropic associations.	Cancer (pleiotropy)	5,020 European ancestry lung cancer cases, 3,718 European ancestry lung adenocarcinoma cases, 3,422 European ancestry lung squamous cell carcinoma cases, 15,414 European ancestry colorectal cancer cases, 10,809 European ancestry breast cancer cases, 4,939 European ancestry estrogen receptor negative breast cancer cases, 1,098 European ancestry ovarian cancer cases, 2,556 European ancestry serous …	NA	4q24	Intergenic	LOC100288146 - TET2	100288146	54790		36383	5498	rs7679673-A	intron_variant	1	NR	1e-10	(subset analysis)			Affymetrix, Illumina [9916564] (imputed)	N
47	rs2726513	4	106075498	rs2189234	2016-07-24	26192919	Liu JZ	2015-07-20	Nat Genet	www.ncbi.nlm.nih.gov/pubmed/26192919	Association analyses identify 38 susceptibility loci for inflammatory bowel disease and highlight shared genetic risk across populations.	Inflammatory bowel disease	12,882 European ancestry cases, 21,770 European ancestry controls	25,273 European ancestry cases, 26,715 European ancestry controls, 548 Iranian ancestry cases, 342 Iranian ancestry control, 1,423 Indian ancestry cases, 990 Indian ancestry controls, 2,824 East Asian ancestry cases, 3,719 East Asian ancestry controls	4q24	NR	TET2			54790			rs2189234-A	intron_variant	0	0.3692	4e-07	(EA)	1.0532	[1.03-1.07]	Affymetrix, Illumina [~ 9000000] (imputed)	N
47	rs2726513	4	106075498	rs2189234	2016-07-24	26192919	Liu JZ	2015-07-20	Nat Genet	www.ncbi.nlm.nih.gov/pubmed/26192919	Association analyses identify 38 susceptibility loci for inflammatory bowel disease and highlight shared genetic risk across populations.	Ulcerative colitis	6,968 European ancestry cases, 20,464 European ancestry controls	10,679 European ancestry cases, 26,715 European ancestry controls, 397 Iranian ancestry cases, 342 Iranian ancestry controls, 1,239 Indian ancestry cases, 990 Indian ancestry controls, 1,134 East Asian ancestry cases, 3,719 East Asian ancestry controls	4q24	intergenic	TET2			54790			rs2189234-A	intron_variant	0	0.3692	2e-10	(EA)	1.08471	[1.06-1.11]	Affymetrix, Illumina [~ 9000000] (imputed)	N
47	rs2647249	4	106084778	rs9790517	2013-09-12	23535729	Michailidou K	2013-04-01	Nat Genet	www.ncbi.nlm.nih.gov/pubmed/23535729	Large-scale genotyping identifies 41 new loci associated with breast cancer risk.	Breast cancer	10,052 European ancestry cases, 12,575 European ancestry controls	45,290 European ancestry cases, 41,880 European ancestry controls	4q24	TET2	TET2			54790			rs9790517-T	intron_variant	0	0.23	4e-08		1.05	[1.03-1.08]	Affymetrix, Illumina [~ 2600000] (imputed)	N
47	rs2903385	4	106106353	rs10010325	2012-10-24	20881960	Lango Allen H	2010-09-29	Nature	www.ncbi.nlm.nih.gov/pubmed/20881960	Hundreds of variants clustered in genomic loci and biological pathways affect human height.	Height	133,653 European ancestry individuals	50,074 European ancestry individuals	4q24	TET2	TET2, TET2-AS1			54790, 104384744			rs10010325-A	intron_variant	0	0.49	4e-11		0.024	[NR] unit increase	Affymetrix, Illumina [2834208] (imputed)	N
47	rs2903385	4	106106353	rs10010325	2016-07-24	26192919	Liu JZ	2015-07-20	Nat Genet	www.ncbi.nlm.nih.gov/pubmed/26192919	Association analyses identify 38 susceptibility loci for inflammatory bowel disease and highlight shared genetic risk across populations.	Ulcerative colitis	6,968 European ancestry cases, 20,464 European ancestry controls	10,679 European ancestry cases, 26,715 European ancestry controls, 397 Iranian ancestry cases, 342 Iranian ancestry controls, 1,239 Indian ancestry cases, 990 Indian ancestry controls, 1,134 East Asian ancestry cases, 3,719 East Asian ancestry controls	4q24	NR	TET2, TET2-AS1			54790, 104384744			rs10010325-?	intron_variant	0	NR	2e-11	(EA)			Affymetrix, Illumina [~ 9000000] (imputed)	N
47	rs2726513	4	106134316	rs6855629	2013-09-12	23563607	Berndt SI	2013-04-07	Nat Genet	www.ncbi.nlm.nih.gov/pubmed/23563607	Genome-wide meta-analysis identifies 11 new loci for anthropometric traits and provides insights into genetic architecture.	Height	8,097 European ancestry tall individuals, 8,099 European ancestry short individuals	4,872 European ancestry tall individuals, 4,831 European ancestry short individuals	4q24	KIAA1546	TET2-AS1, TET2			104384744, 54790			rs6855629-G	intron_variant	0	0.63	2e-08		1.14	[NR]	Affymetrix, Illumina [~ 2800000] (imputed)	N
47	rs1391438	4	106137033	rs2047409	2017-06-08	28166215	Hobbs BD	2017-02-06	Nat Genet	www.ncbi.nlm.nih.gov/pubmed/28166215	Genetic loci associated with chronic obstructive pulmonary disease overlap with loci for lung function and pulmonary fibrosis.	Chronic obstructive pulmonary disease	11,157 European ancestry cases, 36,699 European ancestry controls, 1,142 African American cases, 2,380 African American controls, 199 Korean ancestry cases, 6,741 Korean ancestry controls, 52 Hispanic cases, 548 Hispanic controls.	12,051 European ancestry cases, 11,111 European ancestry controls, 153 Korean ancestry cases, 205 Korean ancestry controls.	4q24	TET2	TET2-AS1, TET2			104384744, 54790			rs2047409-A	intron_variant	0	0.62	2e-13		1.12	[1.08-1.15]	Affymetrix, Illumina [NR] (imputed)	N
47	rs1391438	4	106144735	rs6839705	2017-02-24	27225129	Okbay A	2016-05-26	Nature	www.ncbi.nlm.nih.gov/pubmed/27225129	Genome-wide association study identifies 74 loci associated with educational attainment.	Educational attainment (years of education)	405,072 European ancestry individuals	NA	4q24	NR	TET2-AS1, TET2			104384744, 54790			rs6839705-A	intron_variant	0	0.3565	1e-10		0.0149383	NR unit increase	Affymetrix, Illumina, Perlegen [~ 9300000] (imputed)	N
47	rs1391438	4	106151642	rs1391439	2017-05-11	27182965	Pickrell JK	2016-05-16	Nat Genet	www.ncbi.nlm.nih.gov/pubmed/27182965	Detection and interpretation of shared genetic influences on 42 human traits.	Tonsillectomy	60,098 European ancestry cases, 113,323 European ancestry controls	NA	4q24	TET2	TET2, TET2-AS1			54790, 104384744			rs1391439-?	intron_variant	0	NR	3e-12		1.06	[1.043-1.077]	Illumina [13757430] (imputed)	N
47	rs2726513	4	106196951	rs2454206	2015-07-15	25429064	He M	2014-11-26	Hum Mol Genet	www.ncbi.nlm.nih.gov/pubmed/25429064	Meta-analysis of genome-wide association studies of adult height in East Asians identifies 17 novel loci.	Height	36,227 East Asian ancestry individuals	57,699 East Asian ancestry individuals	4q24	TET2	TET2, TET2-AS1			54790, 104384744			rs2454206-A	missense_variant	0	0.79	6e-09		0.027	[0.013-0.041] unit increase	Affymetrix, Illumina [2704730] (imputed)	N
51	rs34627	5	60499131	rs171748	2014-03-18	23974872	Ripke S	2013-08-25	Nat Genet	www.ncbi.nlm.nih.gov/pubmed/23974872	Genome-wide association analysis identifies 13 new risk loci for schizophrenia.	Schizophrenia	5,001 European ancestry cases, 6,243 European ancestry controls, 8,832 cases, 12,067 controls	4,801 European ancestry cases, 4,741 European ancestry controls, 2,612 European and unknown ancestry cases, 15,021 European and unknown ancestry controls, 581 trios	5q12.1	ZSWIM6, C5orf43	LOC105378992, CTC-436P18.1			105378992, 101928630			rs171748-A	intron_variant	0	0.471	4e-08		1.078	[1.05-1.11]	Affymetrix, Illumina [9871789]	N
51	rs6890684	5	60598543	rs4391122	2015-04-16	25056061	Ripke S	2014-07-22	Nature	www.ncbi.nlm.nih.gov/pubmed/25056061	Biological insights from 108 schizophrenia-associated genetic loci.	Schizophrenia	32,405 European ancestry cases, 42,221 European ancestry controls, 1,235 European ancestry cases and 1,235 European ancestry controls from 1235 parent-offspring trios, 1,836 East Asian ancestry cases, 3,383 East Asian ancestry controls	1,513 European ancestry cases, 66,236 European ancestry controls	5q12.1	ZSWIM6	LOC105378992			105378992			rs4391122-G	regulatory_region_variant	0	0.468	1e-14		1.0846	[1.06-1.11]	Affymetrix, Illumina [9005918] (imputed)	N
51	rs6890684	5	60598543	rs4391122	2016-07-23	26198764	Goes FS	2015-07-21	Am J Med Genet B Neuropsychiatr Genet	www.ncbi.nlm.nih.gov/pubmed/26198764	Genome-wide association study of schizophrenia in Ashkenazi Jews.	Schizophrenia	592 Ashkenazi Jewish ancestry cases, 505 Ashkenazi Jewish ancestry controls, 36,989 cases, 113,075 controls	NA	5q12.1	NR	LOC105378992			105378992			rs4391122-G	regulatory_region_variant	0	NR	2e-13		1.08696	[NR]	Illumina [7158791] (imputed)	N
51	rs6890684	5	60620980	rs7701440	2016-12-21	27046643	Davies G	2016-04-05	Mol Psychiatry	www.ncbi.nlm.nih.gov/pubmed/27046643	Genome-wide association study of cognitive functions and educational attainment in UK Biobank (N=112â€‰151).	Educational attainment	111,114 European ancestry individuals	NA	5q12.1	Intergenic	LOC105378994			105378994			rs7701440-?	intergenic_variant	0	NR	4e-08		0.0233502	[NR] unit decrease	Affymetrix [~ 17300000] (imputed)	N
51	rs6890684	5	60731458	rs7709645	2012-08-14	22688191	Bergen SE	2012-06-12	Mol Psychiatry	www.ncbi.nlm.nih.gov/pubmed/22688191	Genome-wide association study in a Swedish population yields support for greater CNV and MHC involvement in schizophrenia compared with bipolar disorder.	Schizophrenia	2,111 European ancestry cases, 2,535 European ancestry controls	11,271 European ancestry cases, 14,601 European ancestry controls	5q12.1	intergenic	ZSWIM6			57688			rs7709645-?	intron_variant	0	NR	4e-08		1.11	[NR]	Affymetrix [745006]	N
51	rs6890611	5	60800336	rs10223052	2017-02-24	27225129	Okbay A	2016-05-26	Nature	www.ncbi.nlm.nih.gov/pubmed/27225129	Genome-wide association study identifies 74 loci associated with educational attainment.	Educational attainment (years of education)	405,072 European ancestry individuals	NA	5q12.1	NR	ZSWIM6			57688			rs10223052-A	intron_variant	0	0.3599	4e-12		0.0161235	NR unit increase	Affymetrix, Illumina, Perlegen [~ 9300000] (imputed)	N
51	rs6890611	5	60800336	rs10223052	2017-02-25	27225129	Okbay A	2016-05-26	Nature	www.ncbi.nlm.nih.gov/pubmed/27225129	Genome-wide association study identifies 74 loci associated with educational attainment.	Educational attainment (college completion)	280,007 European ancestry individuals	NA	5q12.1	NR	ZSWIM6			57688			rs10223052-A	intron_variant	0	0.3627	1e-08		1.03527	[NR]	Affymetrix, Illumina, Perlegen [~ 9300000] (imputed)	N
54	rs10514301	5	87965021	rs6893807	2014-11-27	24861553	Wen W	2014-05-26	Hum Mol Genet	www.ncbi.nlm.nih.gov/pubmed/24861553	Meta-analysis of genome-wide association studies in East Asian-ancestry populations identifies four new loci for body mass index.	Body mass index	82,438 East Asian ancestry individuals, 4,301 South East Asian ancestry individuals	Up to 47,352 East Asian ancestry individuals	5q14.3	LINC00461	LINC00461			645323			rs6893807-G	intron_variant	0	0.46	1e-06		0.024	[0.014-0.034] unit increase	Affymetrix, Illumina [~ 2500000] (imputed)	N
54	rs6882046	5	87968864	rs6882046	2015-05-08	25201988	Rietveld CA	2014-09-08	Proc Natl Acad Sci U S A	www.ncbi.nlm.nih.gov/pubmed/25201988	Common genetic variants associated with cognitive performance identified using the proxy-phenotype method.	Educational attainment	106,736 European ancestry individuals	NA	5q14.3	intergenic	LINC00461			645323			rs6882046-A	non_coding_transcript_exon_variant	0	0.727	9e-07		0.024	[NR] unit decrease	Affymetrix, Illumina [NR] (imputed)	N
54	rs6882046	5	87968864	rs6882046	2017-02-24	27225129	Okbay A	2016-05-26	Nature	www.ncbi.nlm.nih.gov/pubmed/27225129	Genome-wide association study identifies 74 loci associated with educational attainment.	Educational attainment (years of education)	405,072 European ancestry individuals	NA	5q14.3	NR	LINC00461			645323			rs6882046-A	non_coding_transcript_exon_variant	0	0.7381	8e-14		0.0188897	NR unit decrease	Affymetrix, Illumina, Perlegen [~ 9300000] (imputed)	N
54	rs6882046	5	87968864	rs6882046	2017-02-25	27225129	Okbay A	2016-05-26	Nature	www.ncbi.nlm.nih.gov/pubmed/27225129	Genome-wide association study identifies 74 loci associated with educational attainment.	Educational attainment (college completion)	280,007 European ancestry individuals	NA	5q14.3	NR	LINC00461			645323			rs6882046-?	non_coding_transcript_exon_variant	0	0.2594	2e-10		1.04386	[NR]	Affymetrix, Illumina, Perlegen [~ 9300000] (imputed)	N
54	rs6882046	5	87968864	rs6882046	2017-03-17	27089181	Okbay A	2016-04-18	Nat Genet	www.ncbi.nlm.nih.gov/pubmed/27089181	Genetic variants associated with subjective well-being, depressive symptoms, and neuroticism identified through genome-wide analyses.	Neuroticism	170,911 European ancestry individuals	NA	5q14.3	NR	LINC00461			645323			rs6882046-A	non_coding_transcript_exon_variant	0	0.708	2e-07		0.0197481	[0.012-0.027] unit decrease	Affymetrix [up to 6544775] (imputed)	N
54	rs10514301	5	87968953	rs3814424	2017-05-12	27918536	Lo MT	2016-12-05	Nat Genet	www.ncbi.nlm.nih.gov/pubmed/27918536	Genome-wide analyses for personality traits identify six genomic loci and show correlations with psychiatric disorders.	Conscientiousness	76,551 European ancestry individuals	46,581 European ancestry individuals	5q14.3	LINC00461	LINC00461			645323			rs3814424-T	non_coding_transcript_exon_variant	0	0.17	6e-07		0.289	[0.19-0.39] unit decrease (23andMe Discovery cohort)	Affymetrix, Illumina [2166809] (imputed)	N
57	rs2074613	5	139707439	rs11168036	2016-02-03	25778476	Jun G	2015-03-17	Mol Psychiatry	www.ncbi.nlm.nih.gov/pubmed/25778476	A novel Alzheimer disease locus located near the gene encoding tau protein.	Alzheimer's disease in APOE e4- carriers	7,184 cases, 26,968 controls	718 European ancestry cases, 1,699 European ancestry controls	5q31.3	PFDN1, HBEGF	PFDN1 - HBEGF	5201	1839		24713	4989	rs11168036-T	downstream_gene_variant	1	0.5	3e-07		1.12	[1.07-1.17]	NR [NR]	N
57	rs2074613	5	139707439	rs11168036	2017-06-27	28183528	Jun GR	2017-02-06	Alzheimers Dement	www.ncbi.nlm.nih.gov/pubmed/28183528	Transethnic genome-wide scan identifies novel Alzheimer's disease loci.	Alzheimer's disease	13,100 European ancestry cases, 13,220 European ancestry controls, 1,472 African American cases, 3,511 African American controls, 951 Japanese ancestry cases, 894 Japanese ancestry controls, 51 Israeli-Arab ancestry cases, 64 Israeli-Arab ancestry controls	5,813 European ancestry cases, 20,474 European ancestry controls	5q31.3	HBEGF, PFDN1	PFDN1 - HBEGF	5201	1839		24713	4989	rs11168036-T	downstream_gene_variant	1	0.5	7e-09		1.08	[1.06-1.10]	NR [NR]	N
57	rs2074613	5	139707439	rs11168036	2017-06-27	28183528	Jun GR	2017-02-06	Alzheimers Dement	www.ncbi.nlm.nih.gov/pubmed/28183528	Transethnic genome-wide scan identifies novel Alzheimer's disease loci.	Alzheimer's disease	13,100 European ancestry cases, 13,220 European ancestry controls, 1,472 African American cases, 3,511 African American controls, 951 Japanese ancestry cases, 894 Japanese ancestry controls, 51 Israeli-Arab ancestry cases, 64 Israeli-Arab ancestry controls	5,813 European ancestry cases, 20,474 European ancestry controls	5q31.3	NR	PFDN1 - HBEGF	5201	1839		24713	4989	rs11168036-T	downstream_gene_variant	1	NR	7e-09		1.08	[1.06-1.10]	NR [NR]	N
57	rs2074613	5	139707439	rs11168036	2017-06-27	28183528	Jun GR	2017-02-06	Alzheimers Dement	www.ncbi.nlm.nih.gov/pubmed/28183528	Transethnic genome-wide scan identifies novel Alzheimer's disease loci.	Alzheimer's disease in APOE e4- carriers	4,829 European ancestry cases, 9,740 European ancestry controls, 607 African American cases, 2,270 African American controls, 416 Japanese ancestry cases, 743 Japanese ancestry controls, 51 Israeli-Arab ancestry cases, 64 Israeli-Arab ancestry controls	2,751 European ancestry cases, 11,497 European ancestry controls	5q31.3	NR	PFDN1 - HBEGF	5201	1839		24713	4989	rs11168036-T	downstream_gene_variant	1	NR	1e-06		1.11	[1.06-1.15]	NR [NR]	N
61	rs9477970	6	19076417	rs9350100	2017-05-11	27182965	Pickrell JK	2016-05-16	Nat Genet	www.ncbi.nlm.nih.gov/pubmed/27182965	Detection and interpretation of shared genetic influences on 42 human traits.	Age at voice drop	55,871 European ancestry individuals	NA	6p22.3	RNF144B, ID4	LOC105374958, LOC101928519			105374958, 101928519			rs9350100-?	intergenic_variant	0	NR	1e-07		0.036	[Â­0.049-0.023] unit decrease	Illumina [12039491]	N
61	rs9477970	6	19078274	rs2842385	2015-11-08	25644384	Davies G	2015-02-03	Mol Psychiatry	www.ncbi.nlm.nih.gov/pubmed/25644384	Genetic contributions to variation in general cognitive function: a meta-analysis of genome-wide association studies in the CHARGE consortium (N=53â€‰949).	Cognitive function	51,719 European ancestry individuals 1,473 Erasmus Rupchen (founder/genetic isolate) individuals, 327 Korculan (founder/genetic isolate) individuals, 430 Orcadian (founder/genetic isolate) individuals	NA	6p22.3	LOC101928519	LOC101928519, LOC105374958			101928519, 105374958			rs2842385-?	intergenic_variant	0	NR	8e-06		0.0311	[0.017-0.045] unit decrease	Affymetrix, Illumina [2478500] (imputed)	N
65	rs79738691	6	25120787	rs302972	2016-10-07	26718567	Williams SR	2015-12-30	Neurology	www.ncbi.nlm.nih.gov/pubmed/26718567	Shared genetic susceptibility of vascular-related biomarkers with ischemic and recurrent stroke.	Creatinine levels in ischemic stroke	1,725 European ancestry cases, 258 African ancestry cases, 117 cases	NA	6p22.3	NR	CMAHP			8418			rs302972-?	intron_variant	0	NR	3e-06				Illumina [7500450] (imputed)	N
65	rs77482156	6	25371369	rs62392365	2016-07-23	26198764	Goes FS	2015-07-21	Am J Med Genet B Neuropsychiatr Genet	www.ncbi.nlm.nih.gov/pubmed/26198764	Genome-wide association study of schizophrenia in Ashkenazi Jews.	Schizophrenia	592 Ashkenazi Jewish ancestry cases, 505 Ashkenazi Jewish ancestry controls, 36,989 cases, 113,075 controls	NA	6p22.2	NR	LRRC16A			55604			rs62392365-A	intron_variant	0	NR	4e-15		1.22	[NR]	Illumina [7158791] (imputed)	N
65	rs13201341	6	25874423	rs13198474	2016-07-23	26198764	Goes FS	2015-07-21	Am J Med Genet B Neuropsychiatr Genet	www.ncbi.nlm.nih.gov/pubmed/26198764	Genome-wide association study of schizophrenia in Ashkenazi Jews.	Schizophrenia	592 Ashkenazi Jewish ancestry cases, 505 Ashkenazi Jewish ancestry controls, 36,989 cases, 113,075 controls	NA	6p22.2	NR	SLC17A3			10786			rs13198474-G	5_prime_UTR_variant	0	NR	3e-20		1.21951	[NR]	Illumina [7158791] (imputed)	N
65	rs36162392	6	26409890	rs41266839	2016-07-23	26198764	Goes FS	2015-07-21	Am J Med Genet B Neuropsychiatr Genet	www.ncbi.nlm.nih.gov/pubmed/26198764	Genome-wide association study of schizophrenia in Ashkenazi Jews.	Schizophrenia	592 Ashkenazi Jewish ancestry cases, 505 Ashkenazi Jewish ancestry controls, 36,989 cases, 113,075 controls	NA	6p22.2	NR	BTN3A2, BTN3A1			11118, 11119			rs41266839-G	missense_variant	0	NR	7e-27		1.25	[NR]	Illumina [7158791] (imputed)	N
65	rs36162392	6	26509382	rs35555795	2017-07-18	28240269	Suhre K	2017-02-27	Nat Commun	www.ncbi.nlm.nih.gov/pubmed/28240269	Connecting genetic risk to disease end points through the human blood plasma proteome.	Blood protein levels	997 European ancestry individuals	338 Arab, South Asian and Filipino ancestry individuals	6p22.2	BTN3A3, BTN1A1, HCG11, HMGN4, ABT1, BTN2A1, CTA-14H9.5, RP11-457M11.7, RP11-457M11.6, ZNF322, GUSBP2, POM121L6P, LINC00240	BTN1A1, LOC107986583			696, 107986583			rs35555795-T	missense_variant	0	0.081571	1e-13	(EA, MHC class I polypeptide-related sequence B)	0.596	[0.44-0.75] unit decrease	Affymetrix [509946]	N
65	rs9467777	6	26510564	rs1056667	2013-12-01	23722424	Rietveld CA	2013-05-30	Science	www.ncbi.nlm.nih.gov/pubmed/23722424	GWAS of 126,559 individuals identifies genetic variants associated with educational attainment.	Educational attainment	up to 126,559 European ancestry individuals	NA	6p22.2	BTN1A1	LOC107986583, BTN1A1			107986583, 696			rs1056667-T	3_prime_UTR_variant	0	0.538	2e-08	(Edu Years)	0.093	[NR] unit increase	Affymetrix, Illumina, Perlegen [up to 23218963] (imputed)	N
65	rs9467777	6	26510564	rs1056667	2015-05-08	25201988	Rietveld CA	2014-09-08	Proc Natl Acad Sci U S A	www.ncbi.nlm.nih.gov/pubmed/25201988	Common genetic variants associated with cognitive performance identified using the proxy-phenotype method.	Educational attainment	106,736 European ancestry individuals	NA	6p22.2	intergenic	LOC107986583, BTN1A1			107986583, 696			rs1056667-T	3_prime_UTR_variant	0	0.628	5e-07		0.023	[NR] unit increase	Affymetrix, Illumina [NR] (imputed)	N
65	rs2451729	6	26915000	rs62402013	2016-07-23	26198764	Goes FS	2015-07-21	Am J Med Genet B Neuropsychiatr Genet	www.ncbi.nlm.nih.gov/pubmed/26198764	Genome-wide association study of schizophrenia in Ashkenazi Jews.	Schizophrenia	592 Ashkenazi Jewish ancestry cases, 505 Ashkenazi Jewish ancestry controls, 36,989 cases, 113,075 controls	NA	6p22.2	NR	GUSBP2			387036			rs62402013-G	intron_variant	0	NR	4e-11		1.07527	[NR]	Illumina [7158791] (imputed)	N
65	rs926300	6	27047256	rs6904071	2017-03-17	27089181	Okbay A	2016-04-18	Nat Genet	www.ncbi.nlm.nih.gov/pubmed/27089181	Genetic variants associated with subjective well-being, depressive symptoms, and neuroticism identified through genome-wide analyses.	Neuroticism	170,911 European ancestry individuals	NA	6p22.2	NR	VN1R13P - VN1R11P	387322	387317		18210	3815	rs6904071-A	upstream_gene_variant	1	0.145	8e-07		0.0241967	[0.015-0.034] unit decrease	Affymetrix [up to 6544775] (imputed)	N
65	rs926300	6	27057079	rs2393911	2016-07-06	25993607	de Moor MH	2015-05-20	JAMA Psychiatry	www.ncbi.nlm.nih.gov/pubmed/25993607	Meta-analysis of Genome-wide Association Studies for Neuroticism, and the Polygenic Association With Major Depressive Disorder.	Neuroticism	Up to 627 Cilento (founder/genetic isolate) individuals, up to 2,296 Erasmus Rupchen (founder/genetic isolate) individuals, up to 1,650 Orcadian (founder/genetic isolate) individuals, up to 909 Vis (founder/genetic isolate) individuals, up to 58,179 European ancestry individuals	Up to 9,786 European ancestry individuals	6p22.2	NR	VN1R11P - TRP-CGG2-1	387317	100189172		5084	2442	rs2393911-T	intergenic_variant	1	NR	5e-07		0.039	[0.023-0.055] unit decrease	Affymetrix, Illumina, Perlegen [6949614] (imputed)	N
65	rs36162392	6	27072542	rs55834529	2016-07-23	26198764	Goes FS	2015-07-21	Am J Med Genet B Neuropsychiatr Genet	www.ncbi.nlm.nih.gov/pubmed/26198764	Genome-wide association study of schizophrenia in Ashkenazi Jews.	Schizophrenia	592 Ashkenazi Jewish ancestry cases, 505 Ashkenazi Jewish ancestry controls, 36,989 cases, 113,075 controls	NA	6p22.1	NR	TRS-GCT1-1 - RNU2-62P	100189157	106480224		7376	5027	rs55834529-A	intergenic_variant	1	NR	9e-27		1.24	[NR]	Illumina [7158791] (imputed)	N
65	rs926300	6	27143883	rs13194053	2009-07-10	19571809	Shi J	2009-07-01	Nature	www.ncbi.nlm.nih.gov/pubmed/19571809	Common variants on chromosome 6p22.1 are associated with schizophrenia.	Schizophrenia	2,681 European ancestry cases, 2,653 European ancestry controls, 1,286 African American cases, 973 African American controls	5,327 European ancestry cases, 16,424 European ancestry controls	6p22.1	HIST1H2BJ, SLC17A1, BTN3A2, BTN2A2, BTN3A1, HIST1H2AG, POM121L2, ZNF184, PRSS16, SLC17A3	TRT-AGT6-1 - TRI-AAT5-4	100189143	100189336		13760	1111	rs13194053-T	regulatory_region_variant	1	0.82	1e-08	(EA)	1.28	[NR]	Affymetrix [up to 843798]	N
65	rs926300	6	27143883	rs13194053	2009-07-13	19571811	Purcell SM	2009-07-01	Nature	www.ncbi.nlm.nih.gov/pubmed/19571811	Common polygenic variation contributes to risk of schizophrenia and bipolar disorder.	Schizophrenia	3,322 European ancestry cases, 3,587 European ancestry controls	4,692 European ancestry cases, 15,493 European ancestry controls	6p22.1	MHC	TRT-AGT6-1 - TRI-AAT5-4	100189143	100189336		13760	1111	rs13194053-T	regulatory_region_variant	1	0.86	1e-08		1.22		Affymetrix [739995]	N
65	rs3823427	6	27248931	rs6932590	2009-07-10	19571808	Stefansson H	2009-07-01	Nature	www.ncbi.nlm.nih.gov/pubmed/19571808	Common variants conferring risk of schizophrenia.	Schizophrenia	2,663 European ancestry cases, 13,498 European ancestry controls	10,282 European ancestry cases, 21,093 European ancestry controls	6p22.1	MHC, PRSS16	TRV-CAC2-1 - TRI-AAT10-1	100189363	100189462		810	2933	rs6932590-T	downstream_gene_variant	1	0.78	1e-12		1.16	[NR]	Illumina [314868]	N
65	rs7746199	6	27261324	rs7746199	2017-05-31	28077804	Ben-Avraham D	2017-01-10	Aging (Albany NY)	www.ncbi.nlm.nih.gov/pubmed/28077804	The complex genetics of gait speed: genome-wide meta-analysis approach.	Gait speed in old age	31,478 European ancestry older adults	2,588 European ancestry older adults	6p22.1	POM121L2	TRV-TAC4-1 - TRS-ACT1-1	100189408	100189526		2847	347	rs7746199-C	intron_variant	1	NR	7e-07		0.0109	[0.0066-0.0152] m/sec increase	Affymetrix, Illumina [~ 2500000] (imputed)	N
65	rs7746199	6	27278020	rs16897515	2013-05-08	23894747	Aberg KA	2013-02-01	JAMA Psychiatry	www.ncbi.nlm.nih.gov/pubmed/23894747	A comprehensive family-based replication study of schizophrenia genes.	Schizophrenia	11,185 European ancestry cases, 10,768 European ancestry controls	1,262 African American ancestry individuals, 2,740 European ancestry individuals, 2,296 Asian ancestry individuals	6p22.1	POM121L2	POM121L2			94026			rs16897515-C	missense_variant	0	0.16	4e-07	(EA)	1.3	[NR]	NR [1085772] (imputed)	N
65	rs66886492	6	27413924	rs13195040	2017-04-01	27659466	van der Harst P	2016-09-27	J Am Coll Cardiol	www.ncbi.nlm.nih.gov/pubmed/27659466	52 Genetic Loci Influencing MyocardialÂ Mass.	QRS complex (Cornell)	up to 58,172 European ancestry individuals, up to 690 Orcadian (founder/genetic isolate) individuals	13,263 European ancestry individuals, 3,603 African American individuals, 4,619 Indian ancestry individuals	6p22.1	NR	MCFD2P1 - ZNF184	645927	7738		36454	4597	rs13195040-?	downstream_gene_variant	1	NR	3e-08	(EA)			Affymetrix, Illumina, Perlegen [2766983] (imputed)	N
65	rs66886492	6	27459923	rs34864796	2017-06-16	28166213	Wain LV	2017-02-06	Nat Genet	www.ncbi.nlm.nih.gov/pubmed/28166213	Genome-wide association analyses for lung function and chronic obstructive pulmonary disease identify new loci and potential druggable targets.	Lung function (FEV1)	48,943 European ancestry individuals.	57,176 European ancestry individuals, 38,199 individuals.	6p22.1	ZKSCAN3	TRD-GTC2-10 - TRS-AGA2-4	100189158	23437		12399	3670	rs34864796-A	intergenic_variant	1	0.13	6e-14		0.075	[0.055-0.095] unit decrease	Affymetrix [up to 27624732] (imputed)	N
65	rs66886492	6	27459923	rs34864796	2017-06-16	28166213	Wain LV	2017-02-06	Nat Genet	www.ncbi.nlm.nih.gov/pubmed/28166213	Genome-wide association analyses for lung function and chronic obstructive pulmonary disease identify new loci and potential druggable targets.	Lung function (FEV1/FVC)	48,943 European ancestry individuals	57,176 European ancestry individuals, 38,199 individuals.	6p22.1	ZKSCAN3	TRD-GTC2-10 - TRS-AGA2-4	100189158	23437		12399	3670	rs34864796-A	intergenic_variant	1	0.1274	4e-10		0.062	[0.042-0.082] unit decrease	Affymetrix [27624732] (imputed)	N
65	rs66886492	6	27459923	rs34864796	2017-06-16	28166213	Wain LV	2017-02-06	Nat Genet	www.ncbi.nlm.nih.gov/pubmed/28166213	Genome-wide association analyses for lung function and chronic obstructive pulmonary disease identify new loci and potential druggable targets.	Lung function (FVC)	48,943 European ancestry individuals.	57,176 European ancestry individuals, 38,199 individuals.	6p22.1	ZKSCAN3	TRD-GTC2-10 - TRS-AGA2-4	100189158	23437		12399	3670	rs34864796-A	intergenic_variant	1	0.1274	5e-10		0.062	[0.042-0.082] unit decrease	Affymetrix [27624732] (imputed)	N
65	rs66886492	6	27710165	rs17693963	2012-08-14	22688191	Bergen SE	2012-06-12	Mol Psychiatry	www.ncbi.nlm.nih.gov/pubmed/22688191	Genome-wide association study in a Swedish population yields support for greater CNV and MHC involvement in schizophrenia compared with bipolar disorder.	Schizophrenia	2,111 European ancestry cases, 2,535 European ancestry controls	11,271 European ancestry cases, 14,601 European ancestry controls	6p22.1	MHC	GPR89P - TRV-AAC1-5	394254	791230		3872	11014	rs17693963-?	upstream_gene_variant	1	NR	3e-11		1.24	[NR]	Affymetrix [745006]	N
65	rs66886492	6	27710165	rs17693963	2014-05-03	24166486	Sleiman P	2013-10-29	Sci Rep	www.ncbi.nlm.nih.gov/pubmed/24166486	GWAS meta analysis identifies TSNARE1 as a novel Schizophrenia / Bipolar susceptibility locus.	Schizophrenia, schizoaffective disorder or bipolar disorder	11,985 European, African American, Asian, other and unknown ancestry schizophrenia cases, 377 European, African American, Asian, other and unknown ancestry schizoaffective disorder cases, 1,032 bipolar disorder cases, 34,676 European, African American, Asian, other and unknown ancestry controls	2652 individuals	6p22.1	MHC	GPR89P - TRV-AAC1-5	394254	791230		3872	11014	rs17693963-?	upstream_gene_variant	1	0.904	2e-09				Affymetrix, Illumina [NR] (imputed)	N
65	rs66886492	6	27710165	rs17693963	2015-05-19	24280982	Ruderfer DM	2013-11-26	Mol Psychiatry	www.ncbi.nlm.nih.gov/pubmed/24280982	Polygenic dissection of diagnosis and clinical dimensions of bipolar disorder and schizophrenia.	Schizophrenia or bipolar disorder	Up to 4,528 European ancestry schizophrenia cases, up to 4,841 schizophrenia cases, up to 7,362 European ancestry bipolar disorder cases, up to 3,048 bipolar disorder cases, up to 11,637 European ancestry controls, up to 7,786 controls	NA	6p22.1	MHC	GPR89P - TRV-AAC1-5	394254	791230		3872	11014	rs17693963-?	upstream_gene_variant	1		3e-11	(SCZ or BP vs. controls)			Affymetrix, Illumina [~ 1100000] (imputed)	N
65	rs66886492	6	27710165	rs17693963	2015-05-19	24280982	Ruderfer DM	2013-11-26	Mol Psychiatry	www.ncbi.nlm.nih.gov/pubmed/24280982	Polygenic dissection of diagnosis and clinical dimensions of bipolar disorder and schizophrenia.	Schizophrenia or bipolar disorder	Up to 4,528 European ancestry schizophrenia cases, up to 4,841 schizophrenia cases, up to 7,362 European ancestry bipolar disorder cases, up to 3,048 bipolar disorder cases, up to 11,637 European ancestry controls, up to 7,786 controls	NA	6p22.1	MHC	GPR89P - TRV-AAC1-5	394254	791230		3872	11014	rs17693963-?	upstream_gene_variant	1	NR	3e-09	(SCZ vs. controls)			Affymetrix, Illumina [~ 1100000] (imputed)	N
65	rs66886492	6	27805255	rs34706883	2016-07-23	26198764	Goes FS	2015-07-21	Am J Med Genet B Neuropsychiatr Genet	www.ncbi.nlm.nih.gov/pubmed/26198764	Genome-wide association study of schizophrenia in Ashkenazi Jews.	Schizophrenia	592 Ashkenazi Jewish ancestry cases, 505 Ashkenazi Jewish ancestry controls, 36,989 cases, 113,075 controls	NA	6p22.1	NR	HIST1H4K - HIST1H2AK	8362	8330		5950	403	rs34706883-A	upstream_gene_variant	1	NR	5e-27		1.24	[NR]	Illumina [7158791] (imputed)	N
65	rs66886492	6	28268824	rs33932084	2017-07-18	28240269	Suhre K	2017-02-27	Nat Commun	www.ncbi.nlm.nih.gov/pubmed/28240269	Connecting genetic risk to disease end points through the human blood plasma proteome.	Blood protein levels	997 European ancestry individuals	338 Arab, South Asian and Filipino ancestry individuals	6p22.1	HIST1H4J, ZKSCAN3, OR2B2, HIST1H2BL, HIST1H2AI, HIST1H4K, HIST1H2BPS2, HIST1H1B, HIST1H3I, HIST1H4L, OR2B8P, OR2B7P, ZSCAN12P1, ZNF165, RP1-265C24.5, ZNF192P1, AL022393.7, ZSCAN26, ZSCAN31, ZSCAN23, GPX6, PGBD1, ZSCAN12, HIST1H4PS1, AL009179.1, HIST1H3H, AL049822.1, HIST1H2AJ, HIST1H2BM, Z98744.1, HIST1H2BN, HIST1H2AK, HIST1H2AL, Z98744.2, HIST1H2BO, HIST1H2AM, RNU7-26P, OR2W6P, RPLP2P1, OR2W4P, …	PGBD1			84547			rs33932084-G	missense_variant	0	0.0750252	4e-16	(EA, MHC class I polypeptide-related sequence B)	0.6718	[0.51-0.83] unit decrease	Affymetrix [509946]	N
65	rs66886492	6	28306671	rs13217619	2016-07-23	26198764	Goes FS	2015-07-21	Am J Med Genet B Neuropsychiatr Genet	www.ncbi.nlm.nih.gov/pubmed/26198764	Genome-wide association study of schizophrenia in Ashkenazi Jews.	Schizophrenia	592 Ashkenazi Jewish ancestry cases, 505 Ashkenazi Jewish ancestry controls, 36,989 cases, 113,075 controls	NA	6p22.1	NR	ZSCAN31			64288			rs13217619-T	intron_variant	0	NR	2e-29		1.25	[NR]	Illumina [7158791] (imputed)	N
65	rs1233578	6	28712247	rs115329265	2015-04-16	25056061	Ripke S	2014-07-22	Nature	www.ncbi.nlm.nih.gov/pubmed/25056061	Biological insights from 108 schizophrenia-associated genetic loci.	Schizophrenia	32,405 European ancestry cases, 42,221 European ancestry controls, 1,235 European ancestry cases and 1,235 European ancestry controls from 1235 parent-offspring trios, 1,836 East Asian ancestry cases, 3,383 East Asian ancestry controls	1,513 European ancestry cases, 66,236 European ancestry controls	6p22.1	intergenic	TRR-CCG1-2 - TRK-TTT7-1	100189365	100189332		1446	3274	rs115329265-A	intergenic_variant	1	0.85	3e-31		1.205	[1.168-1.244]	Affymetrix, Illumina [9005918] (imputed)	N
65	rs66886492	6	28776117	rs4324798	2009-11-09	19836008	Landi MT	2009-10-15	Am J Hum Genet	www.ncbi.nlm.nih.gov/pubmed/19836008	A genome-wide association study of lung cancer identifies a region of chromosome 5p15 associated with risk for adenocarcinoma.	Lung adenocarcinoma	5,739 European ancestry cases, 5,848 European ancestry controls	7,561 European ancestry cases, 13,818 European ancestry controls	6p22.1	TRNAA-UGC	TRF-GAA3-1 - TRA-AGC6-1	100189170	100189042		435	3732	rs4324798-A	regulatory_region_variant	1	0.09	2e-08		1.16	[1.09-1.24]	Illumina [515922]	N
65	rs66886492	6	29044701	rs3131085	2017-07-18	28240269	Suhre K	2017-02-27	Nat Commun	www.ncbi.nlm.nih.gov/pubmed/28240269	Connecting genetic risk to disease end points through the human blood plasma proteome.	Blood protein levels	997 European ancestry individuals	338 Arab, South Asian and Filipino ancestry individuals	6p22.1	GABBR1, OR12D3, XXbac-BPG308K3.5, TRIM27, AL662791.1, OR2AD1P, OR2P1P, OR2B3, XXbac-BCX196D17.5, OR2N1P, OR2H4P, OR2B4P, XXbac-BPG308K3.6, RPL13P, ZNF90P2, HCG14, RNU6-930P, LINC01556, KRT18P1, RN7SL471P, HCG15, HCG16, ZNF311, XXbac-BPG258E24.10, OR2W1, SAR1P1, OR2J3, OR2J4P, OR2J2, AL645937.1, XXbac-BPG308J9.3, OR2U2P, OR14J1, OR5V1, OR10C1, OR11A1, XXbac-BPG13B8.11, OR2H1, UBDP1, MAS1LP1, MAS1L…	SAR1AP1			646260			rs3131085-A	non_coding_transcript_exon_variant	0	0.0758032	1e-09	(EA, MHC class I polypeptide-related sequence A)	0.5111	[0.35-0.67] unit increase	Affymetrix [509946]	N
65	rs429479	6	29244219	rs144447022	2016-07-23	26198764	Goes FS	2015-07-21	Am J Med Genet B Neuropsychiatr Genet	www.ncbi.nlm.nih.gov/pubmed/26198764	Genome-wide association study of schizophrenia in Ashkenazi Jews.	Schizophrenia	592 Ashkenazi Jewish ancestry cases, 505 Ashkenazi Jewish ancestry controls, 36,989 cases, 113,075 controls	NA	6p22.1	NR	LOC101929006			101929006			rs144447022-G	intron_variant	0	NR	2e-28		1.25	[NR]	Illumina [7158791] (imputed)	N
65	rs429479	6	29283672	rs3129682	2017-07-18	28240269	Suhre K	2017-02-27	Nat Commun	www.ncbi.nlm.nih.gov/pubmed/28240269	Connecting genetic risk to disease end points through the human blood plasma proteome.	Blood protein levels	997 European ancestry individuals	338 Arab, South Asian and Filipino ancestry individuals	6p22.1	GABBR1, OR12D3, XXbac-BPG308K3.5, TRIM27, AL662791.1, OR2AD1P, OR2P1P, OR2B3, XXbac-BCX196D17.5, OR2N1P, OR2H4P, OR2B4P, XXbac-BPG308K3.6, RPL13P, ZNF90P2, HCG14, RNU6-930P, LINC01556, KRT18P1, RN7SL471P, HCG15, HCG16, ZNF311, XXbac-BPG258E24.10, OR2W1, SAR1P1, OR2J3, OR2J4P, OR2J2, AL645937.1, XXbac-BPG308J9.3, OR2U2P, OR14J1, OR5V1, OR10C1, OR11A1, XXbac-BPG13B8.11, OR2H1, UBDP1, MAS1LP1, MAS1L…	LOC105375005			105375005			rs3129682-T	intergenic_variant	0	0.0774292	1e-19	(EA, MHC class I polypeptide-related sequence B)	0.7369	[0.58-0.89] unit decrease	Affymetrix [509946]	N
65	rs429479	6	29356331	rs9257809	2012-11-30	22961001	Su Z	2012-09-09	Nat Genet	www.ncbi.nlm.nih.gov/pubmed/22961001	Common variants at the MHC locus and at chromosome 16q24.1 predispose to Barrett's esophagus.	Barrett's esophagus	Up to 1,852 European ancestry cases, 5,172 European ancestry controls	5,986 European ancestry cases, 12,825 European ancestry controls	6p22.1	OR2D12, OR2D13, MHC	OR5V1			81696			rs9257809-A	intron_variant	0	0.87	4e-09		1.21	[1.13-1.28]	Illumina [521744]	N
65	rs429479	6	29356331	rs9257809	2017-03-13	27527254	Gharahkhani P	2016-08-12	Lancet Oncol	www.ncbi.nlm.nih.gov/pubmed/27527254	Genome-wide association studies in oesophageal adenocarcinoma and Barrett's oesophagus: a large-scale meta-analysis.	Barrett's esophagus	6,167 European ancestry cases, 17,159 European ancestry controls	NA	6p22.1	MHC	OR5V1			81696			rs9257809-A	intron_variant	0		6e-09		1.2634	[1.18-1.34]	Illumina [11942825] (imputed)	N
65	rs429479	6	29356331	rs9257809	2017-03-13	27527254	Gharahkhani P	2016-08-12	Lancet Oncol	www.ncbi.nlm.nih.gov/pubmed/27527254	Genome-wide association studies in oesophageal adenocarcinoma and Barrett's oesophagus: a large-scale meta-analysis.	Barrett's esophagus or Esophageal adenocarcinoma	6,167 European ancestry Barrett's oesophagus cases, 4,112 European ancestry esophageal adenocarcinoma cases, 17,159 European ancestry controls	NA	6p22.1	MHC	OR5V1			81696			rs9257809-A	intron_variant	0		6e-09		1.23	[1.14-1.31]	Illumina [11951684] (imputed)	N
65	rs429479	6	29461730	rs1233491	2016-01-30	25827949	Kunz M	2015-05-04	Exp Dermatol	www.ncbi.nlm.nih.gov/pubmed/25827949	Genome-wide association study identifies new susceptibility loci for cutaneous lupus erythematosus.	Cutaneous lupus erythematosus	151 European ancestry cases, 1,288 European ancestry controls	219 European ancestry cases, 262 European ancestry controls	6p22.1	MAS1L	LOC105375008 - LOC105375009	105375008	105375009		3798	3547	rs1233491-C	upstream_gene_variant	1	0.088	8e-10		2.2	[1.58-3.08]	Affymetrix [906600]	N
65	rs429479	6	29752808	rs147680653	2017-02-03	27197191	Fehringer G	2016-04-20	Cancer Res	www.ncbi.nlm.nih.gov/pubmed/27197191	Cross-cancer genome-wide analysis of lung, ovary, breast, prostate and colorectal cancer reveals novel pleiotropic associations.	Cancer (pleiotropy)	5,020 European ancestry lung cancer cases, 3,718 European ancestry lung adenocarcinoma cases, 3,422 European ancestry lung squamous cell carcinoma cases, 15,414 European ancestry colorectal cancer cases, 10,809 European ancestry breast cancer cases, 4,939 European ancestry estrogen receptor negative breast cancer cases, 1,098 European ancestry ovarian cancer cases, 2,556 European ancestry serous …	NA	6p22.1	Intergenic	3.8-1.5 - HCG4	353010	54435		18735	6000	rs147680653-G	regulatory_region_variant	1	NR	1e-06	(subset analysis)			Affymetrix, Illumina [9916564] (imputed)	N
65	rs6914699	6	29923838	rs2571391	2011-12-16	22075330	Granada M	2011-11-08	J Allergy Clin Immunol	www.ncbi.nlm.nih.gov/pubmed/22075330	A genome-wide association study of plasma total IgE concentrations in the Framingham Heart Study.	IgE levels	6,819 European ancestry individuals	7,809 European ancestry indivduals	6p22.1	HLA-A	HLA-W			352966			rs2571391-C	intron_variant	0	NR	1e-15		0.06	[NR] unit increase	Affymetrix [2540223] (imputed)	N
65	rs3893463	6	29935250	rs3893464	2011-09-30	21900946	Nakabayashi K	2011-09-08	J Hum Genet	www.ncbi.nlm.nih.gov/pubmed/21900946	Identification of independent risk loci for Graves' disease within the MHC in the Japanese population.	Graves' disease	1,119 Japanese ancestry cases, 2,718 Japanese ancestry controls	432 Japanese ancestry cases, 1,157 Japanese ancestry controls	6p22.1	MHC	HLA-W - MICD	352966	4279		8415	2899	rs3893464-G	intron_variant	1	0.36	2e-20		1.53	[1.39-1.67]	Perlegen [268068]	N
65	rs1150735	6	30008003	rs115265742	2017-08-04	27989323	Ahola-Olli AV	2016-12-13	Am J Hum Genet	www.ncbi.nlm.nih.gov/pubmed/27989323	Genome-wide Association Study Identifies 27 Loci Influencing Concentrations of Circulating Cytokines and Growth Factors.	Interleukin-2 receptor antagonist levels	3,677 Finnish ancestry individuals	NA	6p22.1	NR	ZNRD1-AS1			80862			rs115265742-G	intron_variant	0		8e-06		0.1053	[0.059-0.151] SD units decrease	NR [10700000] (imputed)	N
65	rs2523933	6	30025503	rs259919	2010-01-19	20041166	Fellay J	2009-12-24	PLoS Genet	www.ncbi.nlm.nih.gov/pubmed/20041166	Common genetic variation and the control of HIV-1 in humans.	HIV-1 control	2,362 European ancestry cases	NA	6p22.1	ZNRD1, C6orf12	ZNRD1-AS1			80862			rs259919-?	intron_variant	0	NR	3e-07	(setpoint)			Illumina [NR]	N
65	rs429479	6	30032522	rs8321	2009-01-16	19115949	Limou S	2009-01-01	J Infect Dis	www.ncbi.nlm.nih.gov/pubmed/19115949	Genomewide association study of an AIDS-nonprogression cohort emphasizes the role played by HLA genes (ANRS Genomewide Association Study 02).	AIDS progression	275 European ancestry seropositive non-progressors, 86 European ancestry seropositive rapid progressors, 1,352 European ancestry seronegative controls	(see Fellay 2007)	6p22.1	ZNRD1, RNF39	ZNRD1			30834			rs8321-G	3_prime_UTR_variant	0	NR	5e-07				Illumina [291119]	N
65	rs429479	6	30032522	rs8321	2013-06-06	23453885	Smoller JW	2013-02-27	Lancet	www.ncbi.nlm.nih.gov/pubmed/23453885	Identification of risk loci with shared effects on five major psychiatric disorders: a genome-wide analysis.	Autism spectrum disorder, attention deficit-hyperactivity disorder, bipolar disorder, major depressive disorder, and schizophrenia (combined)	6,990 European ancestry Bipolar disorder cases, 9,227 European ancestry Major depressive disorder cases, 9,379 European ancestry Schizophrenia cases, 161 European ancestry Autism spectrum disorder cases, 4,788 European ancestry Autism spectrum disorder trio cases, 840 European ancestry Attention deficit-hyperactivity disorder cases, 1,947 European ancestry Attention defcit-hyperactivity disorder …	NA	6p22.1	MHC region	ZNRD1			30834			rs8321-?	3_prime_UTR_variant	0	NR	8e-09	(5 degree of freedom test)	1.081	[1.04-1.12]	NR [1252901] (imputed)	N
65	rs2844790	6	30078275	rs2523989	2016-02-04	25936594	Tomer Y	2015-04-27	J Autoimmun	www.ncbi.nlm.nih.gov/pubmed/25936594	Genome wide identification of new genes and pathways in patients with both autoimmune thyroiditis and type 1 diabetes.	Type 1 diabetes and autoimmune thyroid diseases	346 European ancestry cases, 727 European ancestry controls	185 European ancestry cases, 340 European ancestry controls	6p22.1	TRIM31	TRIM31-AS1, TRIM31			104533120, 11074			rs2523989-A	missense_variant	0	NR	2e-08		1.7499		Illumina [514008]	N
65	rs2844790	6	30079993	rs2523987	2017-07-18	28240269	Suhre K	2017-02-27	Nat Commun	www.ncbi.nlm.nih.gov/pubmed/28240269	Connecting genetic risk to disease end points through the human blood plasma proteome.	Blood protein levels	997 European ancestry individuals	338 Arab, South Asian and Filipino ancestry individuals	6p22.1	TRIM31, TRIM31-AS1, TRIM40, SNORA48	TRIM31, TRIM31-AS1			11074, 104533120			rs2523987-C	intron_variant	0	0.11496	2e-13	(EA, MHC class I polypeptide-related sequence A)	0.4957	[0.36-0.63] unit increase	Affymetrix [509946]	N
65	rs2189373	6	30165273	rs2523722	2012-09-29	22883433	Irish Schizophrenia Genomics Consortium & the Wellcome Trust Case Control Consortium 2	2012-08-07	Biol Psychiatry	www.ncbi.nlm.nih.gov/pubmed/22883433	Genome-wide association study implicates HLA-C*01:02 as a risk factor at the major histocompatibility complex locus in schizophrenia.	Schizophrenia	1,606 European ancestry cases, 1,794 European ancestry controls	13,195 European ancestry cases, 31,021 European ancestry controls	6p22.1	MHC, TRIM26	TRIM26			7726			rs2523722-G	intron_variant	0	0.737	1e-16		1.25	[1.12-1.39]	Affymetrix [6212339]	N
65	rs2189373	6	30174131	rs2021722	2011-10-17	21926974	Ripke S	2011-09-18	Nat Genet	www.ncbi.nlm.nih.gov/pubmed/21926974	Genome-wide association study identifies five new schizophrenia loci.	Schizophrenia	9,394 European ancestry cases, 12,462 European ancestry controls	8,442 European ancestry cases, 21,397 European ancestry controls	6p22.1	TRIM26	TRIM26			7726			rs2021722-C	intron_variant	0	0.78	2e-12		1.15	[1.11-1.19]	Affymetrix, Illumina [1252901] (imputed)	N
65	rs2189373	6	30174131	rs2021722	2013-06-06	23453885	Smoller JW	2013-02-27	Lancet	www.ncbi.nlm.nih.gov/pubmed/23453885	Identification of risk loci with shared effects on five major psychiatric disorders: a genome-wide analysis.	Autism spectrum disorder, attention deficit-hyperactivity disorder, bipolar disorder, major depressive disorder, and schizophrenia (combined)	6,990 European ancestry Bipolar disorder cases, 9,227 European ancestry Major depressive disorder cases, 9,379 European ancestry Schizophrenia cases, 161 European ancestry Autism spectrum disorder cases, 4,788 European ancestry Autism spectrum disorder trio cases, 840 European ancestry Attention deficit-hyperactivity disorder cases, 1,947 European ancestry Attention defcit-hyperactivity disorder …	NA	6p22.1	MHC region	TRIM26			7726			rs2021722-?	intron_variant	0	0.789	2e-12	(Modelling analysis)			NR [1252901] (imputed)	N
65	rs2844790	6	30299245	rs3094067	2016-01-30	25827949	Kunz M	2015-05-04	Exp Dermatol	www.ncbi.nlm.nih.gov/pubmed/25827949	Genome-wide association study identifies new susceptibility loci for cutaneous lupus erythematosus.	Cutaneous lupus erythematosus	151 European ancestry cases, 1,288 European ancestry controls	219 European ancestry cases, 262 European ancestry controls	6p22.1	TRIM39, RPP21	TRIM39-RPP21, TRIM39			202658, 56658			rs3094067-G	intron_variant	0	0.096	2e-11		2.32	[1.68-3.20]	Affymetrix [906600]	N
65	rs2844790	6	30336663	rs114200269	2016-07-23	26198764	Goes FS	2015-07-21	Am J Med Genet B Neuropsychiatr Genet	www.ncbi.nlm.nih.gov/pubmed/26198764	Genome-wide association study of schizophrenia in Ashkenazi Jews.	Schizophrenia	592 Ashkenazi Jewish ancestry cases, 505 Ashkenazi Jewish ancestry controls, 36,989 cases, 113,075 controls	NA	6p22.1	NR	UBQLN1P1 - MICC	387117	100129192		4775	45827	rs114200269-T	upstream_gene_variant	1	NR	2e-19		1.23	[NR]	Illumina [7158791] (imputed)	N
65	rs3129817	6	30342753	rs115707823	2017-02-03	27197191	Fehringer G	2016-04-20	Cancer Res	www.ncbi.nlm.nih.gov/pubmed/27197191	Cross-cancer genome-wide analysis of lung, ovary, breast, prostate and colorectal cancer reveals novel pleiotropic associations.	Cancer	5,020 European ancestry lung cancer cases, 3,718 European ancestry lung adenocarcinoma cases, 3,422 European ancestry lung squamous cell carcinoma cases, 15,414 European ancestry colorectal cancer cases, 10,809 European ancestry breast cancer cases, 4,939 European ancestry estrogen receptor negative breast cancer cases, 1,098 European ancestry ovarian cancer cases, 2,556 European ancestry serous …	NA	6p22.1	Intergenic	UBQLN1P1 - MICC	387117	100129192		10865	39737	rs115707823-A	intergenic_variant	1	NR	2e-06		1.1	[NR]	Affymetrix, Illumina [9916564] (imputed)	N
65	rs3129817	6	30342753	rs115707823	2017-02-03	27197191	Fehringer G	2016-04-20	Cancer Res	www.ncbi.nlm.nih.gov/pubmed/27197191	Cross-cancer genome-wide analysis of lung, ovary, breast, prostate and colorectal cancer reveals novel pleiotropic associations.	Cancer (pleiotropy)	5,020 European ancestry lung cancer cases, 3,718 European ancestry lung adenocarcinoma cases, 3,422 European ancestry lung squamous cell carcinoma cases, 15,414 European ancestry colorectal cancer cases, 10,809 European ancestry breast cancer cases, 4,939 European ancestry estrogen receptor negative breast cancer cases, 1,098 European ancestry ovarian cancer cases, 2,556 European ancestry serous …	NA	6p22.1	Intergenic	UBQLN1P1 - MICC	387117	100129192		10865	39737	rs115707823-A	intergenic_variant	1	NR	5e-07	(subset analysis)			Affymetrix, Illumina [9916564] (imputed)	N
65	rs3129977	6	30409249	rs3132645	2017-07-18	28240269	Suhre K	2017-02-27	Nat Commun	www.ncbi.nlm.nih.gov/pubmed/28240269	Connecting genetic risk to disease end points through the human blood plasma proteome.	Blood protein levels	997 European ancestry individuals	338 Arab, South Asian and Filipino ancestry individuals	6p22.1	RNF39, TRIM31, FLOT1, PPP1R18, HLA-J, ZNRD1-AS1_3, ZNRD1, TRIM26, HCG17, TRIM26BP, HLA-L, TRIM39-RPP21, RPP21, HCG19P, ATAT1, NRM, IER3, HCG20, LINC00243, ZNRD1-AS1, HCG4P3, PPP1R11, TRIM31-AS1, TRIM40, TRIM10, TRIM15, PAIP1P1, XXbac-BPG283O16.9, HCG18, TRIM39, HLA-N, UBQLN1P1, MICC, SUCLA2P1, GNL1, ABCF1, PPP1R10, PTMAP1, MRPS18B, C6orf136, AL662800.2, DHX16, AL662797.1, XXbac-BPG252P9.9, TUBB, …	MICC - LOC105375012	100129192	105375012		21706	19392	rs3132645-C	intergenic_variant	1	0.0942829	4e-22	(EA, MHC class I polypeptide-related sequence B)	0.7147	[0.57-0.86] unit decrease	Affymetrix [509946]	N
65	rs3129977	6	30763291	rs3131060	2016-01-30	25827949	Kunz M	2015-05-04	Exp Dermatol	www.ncbi.nlm.nih.gov/pubmed/25827949	Genome-wide association study identifies new susceptibility loci for cutaneous lupus erythematosus.	Cutaneous lupus erythematosus	151 European ancestry cases, 1,288 European ancestry controls	219 European ancestry cases, 262 European ancestry controls	6p21.33	FLOT1	LOC105375013 - LINC00243	105375013	401247		3264	17352	rs3131060-A	downstream_gene_variant	1	0.112	1e-13		2.3	[1.71-3.11]	Affymetrix [906600]	N
65	rs3129977	6	30782002	rs886424	2012-08-14	22688191	Bergen SE	2012-06-12	Mol Psychiatry	www.ncbi.nlm.nih.gov/pubmed/22688191	Genome-wide association study in a Swedish population yields support for greater CNV and MHC involvement in schizophrenia compared with bipolar disorder.	Bipolar disorder and schizophrenia	2,111 European ancestry schizophrenia cases, 836 European ancestry bipolar disorder cases, 2,535 European ancestry controls	NA	6p21.33	other genes, MHC	LINC00243			401247			rs886424-?	non_coding_transcript_exon_variant	0	NR	9e-07		1.37	[NR]	Affymetrix [745006]	N
65	rs3129977	6	30782002	rs886424	2016-02-04	25936594	Tomer Y	2015-04-27	J Autoimmun	www.ncbi.nlm.nih.gov/pubmed/25936594	Genome wide identification of new genes and pathways in patients with both autoimmune thyroiditis and type 1 diabetes.	Type 1 diabetes and autoimmune thyroid diseases	346 European ancestry cases, 727 European ancestry controls	185 European ancestry cases, 340 European ancestry controls	6p21.33	IER3, DDR1	LINC00243			401247			rs886424-A	non_coding_transcript_exon_variant	0	NR	3e-14		2.2107		Illumina [514008]	N
65	rs3129977	6	30787762	rs1264353	2017-04-01	27659466	van der Harst P	2016-09-27	J Am Coll Cardiol	www.ncbi.nlm.nih.gov/pubmed/27659466	52 Genetic Loci Influencing MyocardialÂ Mass.	QRS complex (Cornell)	up to 58,172 European ancestry individuals, up to 690 Orcadian (founder/genetic isolate) individuals	13,263 European ancestry individuals, 3,603 African American individuals, 4,619 Indian ancestry individuals	6p21.33	NR	LINC00243			401247			rs1264353-?	intron_variant	0	NR	7e-06	(EA)			Affymetrix, Illumina, Perlegen [2766983] (imputed)	N
65	rs3129977	6	30985828	rs1634726	2016-12-01	27015805	Pilling LC	2016-03-23	Aging (Albany NY)	www.ncbi.nlm.nih.gov/pubmed/27015805	Human longevity is influenced by many genetic variants: evidence from 75,000 UK Biobank participants.	Parental longevity (mother's age at death)	52,776 middle-aged British individuals	NA	6p21.33	NR	MUC22			100507679			rs1634726-?	intron_variant	0	NR	6e-06		0.032105	[0.018-0.046] unit increase	Affymetrix [9658292] (imputed)	N
68	rs7773141	6	98346633	rs1338552	2017-05-11	27182965	Pickrell JK	2016-05-16	Nat Genet	www.ncbi.nlm.nih.gov/pubmed/27182965	Detection and interpretation of shared genetic influences on 42 human traits.	Photic sneeze reflex	32,446 European ancestry cases, 67,249 European ancestry controls	NA	6q16.1	MMS22L, POU3F2	LOC101927314 - MIR2113	101927314	100302164		189840	125774	rs1338552-?	intron_variant	1	NR	1e-17		1.092	[1.070-1.115]	Illumina [13729857] (imputed)	N
68	rs7773141	6	98346801	rs1338554	2017-02-24	27225129	Okbay A	2016-05-26	Nature	www.ncbi.nlm.nih.gov/pubmed/27225129	Genome-wide association study identifies 74 loci associated with educational attainment.	Educational attainment (years of education)	405,072 European ancestry individuals	NA	6q16.1	NR	LOC101927314 - MIR2113	101927314	100302164		190008	125606	rs1338554-A	intron_variant	1	0.4975	2e-11		0.0150217	NR unit increase	Affymetrix, Illumina, Perlegen [~ 9300000] (imputed)	N
68	rs7773141	6	98358575	rs6924808	2015-12-03	25601762	Wang Y	2015-01-20	Pharmacogenomics J	www.ncbi.nlm.nih.gov/pubmed/25601762	Pharmacodynamic genome-wide association study identifies new responsive loci for glucocorticoid intervention in asthma.	Response to inhaled glucocorticoid treatment in asthma (change in FEV1)	120 individuals	410 individuals	6q16.1	NR	LOC101927314 - MIR2113	101927314	100302164		201782	113832	rs6924808-?	intron_variant	1		7e-16				Affymetrix [266944]	N
68	rs10872224	6	98399521	rs4548017	2017-03-31	27694959	Bonder MJ	2016-10-03	Nat Genet	www.ncbi.nlm.nih.gov/pubmed/27694959	The effect of host genetics on the gut microbiome.	Gut microbiota (bacterial taxa)	984 European ancestry individuals	530 European ancestry individuals	6q16.1	MMS22L	LOC101927314 - MIR2113	101927314	100302164		242728	72886	rs4548017-A	intron_variant	1	NR	2e-08	(k__Archaea|p__Euryarchaeota|c__Methanobacteria)	5.65652	NR Z-score increase	Illumina [8100000] (imputed)	N
68	rs10872224	6	98399521	rs4548017	2017-03-31	27694959	Bonder MJ	2016-10-03	Nat Genet	www.ncbi.nlm.nih.gov/pubmed/27694959	The effect of host genetics on the gut microbiome.	Gut microbiota (bacterial taxa)	984 European ancestry individuals	530 European ancestry individuals	6q16.1	MMS22L	LOC101927314 - MIR2113	101927314	100302164		242728	72886	rs4548017-A	intron_variant	1	NR	2e-08	(k__Archaea|p__Euryarchaeota|c__Methanobacteria|o__Methanobacteriales)	5.65652	NR Z-score increase	Illumina [8100000] (imputed)	N
68	rs10872224	6	98399521	rs4548017	2017-03-31	27694959	Bonder MJ	2016-10-03	Nat Genet	www.ncbi.nlm.nih.gov/pubmed/27694959	The effect of host genetics on the gut microbiome.	Gut microbiota (bacterial taxa)	984 European ancestry individuals	530 European ancestry individuals	6q16.1	MMS22L	LOC101927314 - MIR2113	101927314	100302164		242728	72886	rs4548017-A	intron_variant	1	NR	2e-08	(k__Archaea|p__Euryarchaeota|c__Methanobacteria|o__Methanobacteriales|f__Methanobacteriaceae)	5.65652	NR Z-score increase	Illumina [8100000] (imputed)	N
68	rs10872224	6	98399521	rs4548017	2017-03-31	27694959	Bonder MJ	2016-10-03	Nat Genet	www.ncbi.nlm.nih.gov/pubmed/27694959	The effect of host genetics on the gut microbiome.	Gut microbiota (bacterial taxa)	984 European ancestry individuals	530 European ancestry individuals	6q16.1	MMS22L	LOC101927314 - MIR2113	101927314	100302164		242728	72886	rs4548017-A	intron_variant	1	NR	4e-08	(k__Archaea)	5.48599	NR Z-score increase	Illumina [8100000] (imputed)	N
68	rs10872224	6	98399521	rs4548017	2017-03-31	27694959	Bonder MJ	2016-10-03	Nat Genet	www.ncbi.nlm.nih.gov/pubmed/27694959	The effect of host genetics on the gut microbiome.	Gut microbiota (bacterial taxa)	984 European ancestry individuals	530 European ancestry individuals	6q16.1	MMS22L	LOC101927314 - MIR2113	101927314	100302164		242728	72886	rs4548017-A	intron_variant	1	NR	4e-08	(k__Archaea|p__Euryarchaeota)	5.48599	NR Z-score increase	Illumina [8100000] (imputed)	N
68	rs7773141	6	98495952	rs2505059	2013-11-14	23648065	Low SK	2013-05-04	Cancer Sci	www.ncbi.nlm.nih.gov/pubmed/23648065	Genome-wide association study of chemotherapeutic agent-induced severe neutropenia/leucopenia for patients in Biobank Japan.	Adverse response to chemotherapy (neutropenia/leucopenia) (all anthracycline-based drugs)	184 Japanese ancestry cases, 459 Japanese ancestry controls	NA	6q16.1	MIR2113	MIR2113 - EIF4EBP2P3	100302164	100190924		23455	130584	rs2505059-G	intron_variant	1	0.398	5e-06	(Allelic model)	1.765	[1.383-2.252]	Illumina [733202]	N
68	rs10872224	6	98508087	rs28792186	2017-02-25	27225129	Okbay A	2016-05-26	Nature	www.ncbi.nlm.nih.gov/pubmed/27225129	Genome-wide association study identifies 74 loci associated with educational attainment.	Educational attainment (college completion)	280,007 European ancestry individuals	NA	6q16.1	NR	MIR2113 - EIF4EBP2P3	100302164	100190924		35590	118449	rs28792186-?	intron_variant	1	0.3905	1e-11		1.04199	[NR]	Affymetrix, Illumina, Perlegen [~ 9300000] (imputed)	N
68	rs2388334	6	98549801	rs9401593	2017-02-24	27225129	Okbay A	2016-05-26	Nature	www.ncbi.nlm.nih.gov/pubmed/27225129	Genome-wide association study identifies 74 loci associated with educational attainment.	Educational attainment (years of education)	405,072 European ancestry individuals	NA	6q16.1	NR	MIR2113 - EIF4EBP2P3	100302164	100190924		77304	76735	rs9401593-A	intron_variant	1	0.5157	4e-28		0.0244707	NR unit decrease	Affymetrix, Illumina, Perlegen [~ 9300000] (imputed)	N
68	rs2388334	6	98550289	rs1906252	2016-12-21	27046643	Davies G	2016-04-05	Mol Psychiatry	www.ncbi.nlm.nih.gov/pubmed/27046643	Genome-wide association study of cognitive functions and educational attainment in UK Biobank (N=112â€‰151).	Educational attainment	111,114 European ancestry individuals	NA	6q16.1	Intergenic	MIR2113 - EIF4EBP2P3	100302164	100190924		77792	76247	rs1906252-?	intron_variant	1	NR	1e-09		0.0261309	[NR] unit increase	Affymetrix [~ 17300000] (imputed)	N
68	rs2388334	6	98553894	rs1487441	2015-05-08	25201988	Rietveld CA	2014-09-08	Proc Natl Acad Sci U S A	www.ncbi.nlm.nih.gov/pubmed/25201988	Common genetic variants associated with cognitive performance identified using the proxy-phenotype method.	Educational attainment	106,736 European ancestry individuals	NA	6q16.1	POU3F2	MIR2113 - EIF4EBP2P3	100302164	100190924		81397	72642	rs1487441-A	intron_variant	1	0.473	2e-09		0.026	[NR] unit increase	Affymetrix, Illumina [NR] (imputed)	N
68	rs2388334	6	98553894	rs1487441	2017-03-10	27329760	Hou L	2016-06-21	Hum Mol Genet	www.ncbi.nlm.nih.gov/pubmed/27329760	Genome-wide association study of 40,000 individuals identifies two novel loci associated with bipolar disorder.	Bipolar disorder	7,647 European ancestry cases, 27,303 European ancestry controls	2,137 European ancestry cases, 3,168 European ancestry controls	6q16.1	POU3F2, MIR2113	MIR2113 - EIF4EBP2P3	100302164	100190924		81397	72642	rs1487441-G	intron_variant	1	0.51	3e-08		1.12	[1.08-1.15]	Affymetrix, Illumina [9692718] (imputed)	N
68	rs2388334	6	98572120	rs10457441	2015-11-08	25644384	Davies G	2015-02-03	Mol Psychiatry	www.ncbi.nlm.nih.gov/pubmed/25644384	Genetic contributions to variation in general cognitive function: a meta-analysis of genome-wide association studies in the CHARGE consortium (N=53â€‰949).	Cognitive function	51,719 European ancestry individuals 1,473 Erasmus Rupchen (founder/genetic isolate) individuals, 327 Korculan (founder/genetic isolate) individuals, 430 Orcadian (founder/genetic isolate) individuals	NA	6q16.1	intergenic	MIR2113 - EIF4EBP2P3	100302164	100190924		99623	54416	rs10457441-?	intron_variant	1	NR	4e-09		0.0324	[0.022-0.043] unit decrease	Affymetrix, Illumina [2478500] (imputed)	N
68	rs2388334	6	98576223	rs12202969	2014-10-22	24618891	MÃ¼hleisen	2014-03-11	Nat Commun	www.ncbi.nlm.nih.gov/pubmed/24618891	Genome-wide association study reveals two new risk loci for bipolar disorder.	Bipolar disorder	9,747 European ancestry cases, 14,278 European ancestry controls	NA	6q16.1	POU3F2, MIR2113	MIR2113 - EIF4EBP2P3	100302164	100190924		103726	50313	rs12202969-A	intron_variant	1	NR	1e-08		1.12	[NR]	Illumina [2267487] (imputed)	N
68	rs2388334	6	98584733	rs9320913	2013-11-29	23722424	Rietveld CA	2013-05-30	Science	www.ncbi.nlm.nih.gov/pubmed/23722424	GWAS of 126,559 individuals identifies genetic variants associated with educational attainment.	Educational attainment	up to 101,069 European ancestry individuals	25,490 European ancestry individuals	6q16.1	LOC100129158	MIR2113 - EIF4EBP2P3	100302164	100190924		112236	41803	rs9320913-A	intron_variant	1	0.483	4e-10	(Edu Years)	0.101	[NR] unit increase	Affymetrix, Illumina, Perlegen [up to 2309290] (imputed)	N
68	rs2388334	6	98584733	rs9320913	2017-07-18	28530673	Sniekers S	2017-05-22	Nat Genet	www.ncbi.nlm.nih.gov/pubmed/28530673	Genome-wide association meta-analysis of 78,308 individuals identifies new loci and genes influencing human intelligence.	Intelligence	up to 58,799 European ancestry adults, up to 19,509 European ancestry children	NA	6q16.1	MIR2113, POU3F2	MIR2113 - EIF4EBP2P3	100302164	100190924		112236	41803	rs9320913-A	intron_variant	1	0.4836	4e-11		6.612	z score increase	Affymetrix, Illumina [12104294] (imputed)	N
68	rs2388334	6	98584733	rs9320913	2017-07-18	28530673	Sniekers S	2017-05-22	Nat Genet	www.ncbi.nlm.nih.gov/pubmed/28530673	Genome-wide association meta-analysis of 78,308 individuals identifies new loci and genes influencing human intelligence.	Intelligence	up to 58,799 European ancestry adults, up to 19,509 European ancestry children	NA	6q16.1	MIR2113, POU3F2	MIR2113 - EIF4EBP2P3	100302164	100190924		112236	41803	rs9320913-A	intron_variant	1	0.4836	9e-09	(Adults)	5.751	z score increase	Affymetrix, Illumina [12104294] (imputed)	N
68	rs2388334	6	98588754	rs9375225	2013-06-14	23459443	Avery CL	2013-03-05	Pharmacogenomics J	www.ncbi.nlm.nih.gov/pubmed/23459443	Drug-gene interactions and the search for missing heritability: a cross-sectional pharmacogenomics study of the QT interval.	QT interval (drug interaction)	33,781 European ancestry individuals	NA	6q16.1	POU3F2	MIR2113 - EIF4EBP2P3	100302164	100190924		116257	37782	rs9375225-T	intron_variant	1	0.48	6e-06	(Tri-Tetra/cyclic antidepressants)			Affymetrix, Illumina [~ 2500000] (imputed)	N
68	rs7758926	6	98739774	rs6909430	2009-10-15	19197348	Lowe JK	2009-02-06	PLoS Genet	www.ncbi.nlm.nih.gov/pubmed/19197348	Genome-wide association studies in an isolated founder population from the Pacific Island of Kosrae.	Quantitative traits	2,906 Kosraen individuals	NA	6q16.1	intergenic	EIF4EBP2P3 - LOC105377910	100190924	105377910		112058	225996	rs6909430-G	intron_variant	1	0.08	8e-06	(TSH)	0.49	[NR] mIU/L decrease	Affymetrix [408775]	N
69	rs9384679	6	108895386	rs2490272	2017-07-18	28530673	Sniekers S	2017-05-22	Nat Genet	www.ncbi.nlm.nih.gov/pubmed/28530673	Genome-wide association meta-analysis of 78,308 individuals identifies new loci and genes influencing human intelligence.	Intelligence	up to 58,799 European ancestry adults, up to 19,509 European ancestry children	NA	6q21	FOXO3, LACE1	FOXO3			2309			rs2490272-T	intron_variant	0	0.6308	1e-13		7.441	z score increase	Affymetrix, Illumina [12104294] (imputed)	N
69	rs9384679	6	108895386	rs2490272	2017-07-18	28530673	Sniekers S	2017-05-22	Nat Genet	www.ncbi.nlm.nih.gov/pubmed/28530673	Genome-wide association meta-analysis of 78,308 individuals identifies new loci and genes influencing human intelligence.	Intelligence	up to 58,799 European ancestry adults, up to 19,509 European ancestry children	NA	6q21	FOXO3, LACE1	FOXO3			2309			rs2490272-T	intron_variant	0	0.6308	2e-12	(Adults)	7.063	z score increase	Affymetrix, Illumina [12104294] (imputed)	N
69	rs9398173	6	108977663	rs9400239	2016-01-27	25673413	Locke AE	2015-02-12	Nature	www.ncbi.nlm.nih.gov/pubmed/25673413	Genetic studies of body mass index yield new insights for obesity biology.	Body mass index	up to 104,666 European ancestry male individuals, up to 132,115 European ancestry female individuals, 370 African American male individuals, 517 African American female individuals, 512 Hispanic male individuals, 764 Hispanic female individuals	up to 48,274 European ancestry male individuals, up to 39,864 European ancestry female individuals, 2,441 African American or Afro-Caribbean male individuals, 6,314 African American or Afro-Caribbean female individuals, 919 Filipino male individuals, 828 Filipino female individuals, 205 Seychelles male individuals, 287 Seychelles female individuals, 2,964 South Asian ancestry male individuals, 65…	6q21	FOXO3	FOXO3			2309			rs9400239-C	5_prime_UTR_variant	0	0.673	7e-08		0.017	[0.011-0.024] kg/m2 increase	Affymetrix, Illumina [2550021]	N
69	rs9398173	6	108977663	rs9400239	2016-01-27	25673413	Locke AE	2015-02-12	Nature	www.ncbi.nlm.nih.gov/pubmed/25673413	Genetic studies of body mass index yield new insights for obesity biology.	Body mass index	up to 104,666 European ancestry male individuals, up to 132,115 European ancestry female individuals, 370 African American male individuals, 517 African American female individuals, 512 Hispanic male individuals, 764 Hispanic female individuals	up to 48,274 European ancestry male individuals, up to 39,864 European ancestry female individuals, 2,441 African American or Afro-Caribbean male individuals, 6,314 African American or Afro-Caribbean female individuals, 919 Filipino male individuals, 828 Filipino female individuals, 205 Seychelles male individuals, 287 Seychelles female individuals, 2,964 South Asian ancestry male individuals, 65…	6q21	FOXO3	FOXO3			2309			rs9400239-C	5_prime_UTR_variant	0	0.688	2e-08	(EA)	0.019	[0.012-0.025] kg/m2 increase	Affymetrix, Illumina [2550021]	N
69	rs9398173	6	108977663	rs9400239	2016-01-27	25673413	Locke AE	2015-02-12	Nature	www.ncbi.nlm.nih.gov/pubmed/25673413	Genetic studies of body mass index yield new insights for obesity biology.	Body mass index	up to 104,666 European ancestry male individuals, up to 132,115 European ancestry female individuals, 370 African American male individuals, 517 African American female individuals, 512 Hispanic male individuals, 764 Hispanic female individuals	up to 48,274 European ancestry male individuals, up to 39,864 European ancestry female individuals, 2,441 African American or Afro-Caribbean male individuals, 6,314 African American or Afro-Caribbean female individuals, 919 Filipino male individuals, 828 Filipino female individuals, 205 Seychelles male individuals, 287 Seychelles female individuals, 2,964 South Asian ancestry male individuals, 65…	6q21	FOXO3	FOXO3			2309			rs9400239-C	5_prime_UTR_variant	0	0.69	1e-07	(EA, women)	0.023	[0.014-0.031] kg/m2 increase	Affymetrix, Illumina [2550021]	N
69	rs9398173	6	108977663	rs9400239	2017-05-23	25673412	Shungin D	2015-02-12	Nature	www.ncbi.nlm.nih.gov/pubmed/25673412	New genetic loci link adipose and insulin biology to body fat distribution.	Waist circumference	up to 56,910 European ancestry men, up to 86,570 European ancestry women	up to 36,570 European ancestry men, 30,172 European ancestry women, 915 Filipino ancestry men, 735 Filipino ancestry women, 2,351 African American/Afro-Caribbean ancestry men, 6,258 African American/Afro-Caribbean ancestry women, 2,285 South Asian ancestry men, 506 South Asian ancestry women, 195 Seychellois ancestry men, 266 Seychellois ancestry women	6q21	FOXO3	FOXO3			2309			rs9400239-T	5_prime_UTR_variant	0	0.3145	2e-11	(EA)	0.0244	[0.017-0.031] unit decrease	Affymetrix, Illumina, Perlegen [up to 2542447] (imputed)	N
69	rs9398173	6	108977663	rs9400239	2017-05-23	25673412	Shungin D	2015-02-12	Nature	www.ncbi.nlm.nih.gov/pubmed/25673412	New genetic loci link adipose and insulin biology to body fat distribution.	Waist circumference	up to 56,910 European ancestry men, up to 86,570 European ancestry women	up to 36,570 European ancestry men, 30,172 European ancestry women, 915 Filipino ancestry men, 735 Filipino ancestry women, 2,351 African American/Afro-Caribbean ancestry men, 6,258 African American/Afro-Caribbean ancestry women, 2,285 South Asian ancestry men, 506 South Asian ancestry women, 195 Seychellois ancestry men, 266 Seychellois ancestry women	6q21	FOXO3	FOXO3			2309			rs9400239-T	5_prime_UTR_variant	0	0.3145	3e-06	(EA, men)	0.0235	[0.014-0.033] unit decrease	Affymetrix, Illumina, Perlegen [up to 2542447] (imputed)	N
69	rs9398173	6	108977663	rs9400239	2017-05-23	25673412	Shungin D	2015-02-12	Nature	www.ncbi.nlm.nih.gov/pubmed/25673412	New genetic loci link adipose and insulin biology to body fat distribution.	Waist circumference	up to 56,910 European ancestry men, up to 86,570 European ancestry women	up to 36,570 European ancestry men, 30,172 European ancestry women, 915 Filipino ancestry men, 735 Filipino ancestry women, 2,351 African American/Afro-Caribbean ancestry men, 6,258 African American/Afro-Caribbean ancestry women, 2,285 South Asian ancestry men, 506 South Asian ancestry women, 195 Seychellois ancestry men, 266 Seychellois ancestry women	6q21	FOXO3	FOXO3			2309			rs9400239-T	5_prime_UTR_variant	0	0.3145	6e-08	(EA, women)	0.0255	[0.016-0.035] unit decrease	Affymetrix, Illumina, Perlegen [up to 2542447] (imputed)	N
69	rs9398173	6	108977663	rs9400239	2017-08-10	28443625	Justice AE	2017-04-26	Nat Commun	www.ncbi.nlm.nih.gov/pubmed/28443625	Genome-wide meta-analysis of 241,258 adults accounting for smoking behaviour identifies novel loci for obesity traits.	BMI (adjusted for smoking behaviour)	98,173 European ancestry women, 64,373 European ancestry men, 5,829 European ancestry individuals, 10,500 African American/Afro-Caribbean ancestry women, 2,706 African American/Afro-Caribbean ancestry men, 1,030 Indian Asian ancestry women, 7,648 Indian Asian ancestry men, 1,793 Filipino ancestry women, 2,944 Hispanic/Latino ancestry women, 1,764 Hispanic/Latino ancestry men	21,496 European ancestry women, 24,385 European ancestry men, 118,364 European ancestry individuals, 2,326 African American/Afro-Caribbean ancestry women, 855 African American/Afro-Caribbean ancestry men	6q21	FOXO3	FOXO3			2309			rs9400239-T	5_prime_UTR_variant	0	0.3467	2e-06		0.0163	[0.0096-0.023] kg/m2 decrease	Affymetrix, Illumina, Perlegen [up to 2800000] (imputed)	N
69	rs9398173	6	108983527	rs9398171	2016-07-23	26198764	Goes FS	2015-07-21	Am J Med Genet B Neuropsychiatr Genet	www.ncbi.nlm.nih.gov/pubmed/26198764	Genome-wide association study of schizophrenia in Ashkenazi Jews.	Schizophrenia	592 Ashkenazi Jewish ancestry cases, 505 Ashkenazi Jewish ancestry controls, 36,989 cases, 113,075 controls	NA	6q21	NR	FOXO3			2309			rs9398171-C	intron_variant	0	NR	4e-08		1.06383	[NR]	Illumina [7158791] (imputed)	N
69	rs9398173	6	108988184	rs2153960	2011-02-22	21216879	Kaplan RC	2011-01-07	Hum Mol Genet	www.ncbi.nlm.nih.gov/pubmed/21216879	A genome-wide association study identifies novel loci associated with circulating IGF-I and IGFBP-3.	Insulin-like growth factors	10,280 European ancestry individuals	NA	6q21	FOXO3	FOXO3			2309			rs2153960-A	intron_variant	0	0.69	5e-07	(IGF-I)			Affymetrix, Illumina [~ 2500000] (imputed)	N
69	rs9398173	6	108996963	rs3800229	2017-05-23	25673412	Shungin D	2015-02-12	Nature	www.ncbi.nlm.nih.gov/pubmed/25673412	New genetic loci link adipose and insulin biology to body fat distribution.	Hip circumference	up to 56,910 European ancestry men, up to 86,570 European ancestry women	up to 36,570 European ancestry men, 30,172 European ancestry women, 915 Filipino ancestry men, 735 Filipino ancestry women, 2,351 African American/Afro-Caribbean ancestry men, 6,258 African American/Afro-Caribbean ancestry women, 2,285 South Asian ancestry men, 506 South Asian ancestry women, 195 Seychellois ancestry men, 266 Seychellois ancestry women	6q21	FOXO3A	FOXO3			2309			rs3800229-T	intron_variant	0	0.6917	3e-08	(EA)	0.0211	[0.014-0.029] unit increase	Affymetrix, Illumina, Perlegen [up to 2542447] (imputed)	N
72	rs3113262	7	69937950	rs3094901	2017-05-11	27182965	Pickrell JK	2016-05-16	Nat Genet	www.ncbi.nlm.nih.gov/pubmed/27182965	Detection and interpretation of shared genetic influences on 42 human traits.	Monobrow	69,284 European ancestry individuals	NA	7q11.22	AUTS2	AUTS2			26053			rs3094901-?	intron_variant	0	NR	2e-09		0.022	[0.029-0.015] unit decrease	Illumina [12039491] (imputed)	N
73	rs56150095	7	71741797	rs756912	2017-02-24	27225129	Okbay A	2016-05-26	Nature	www.ncbi.nlm.nih.gov/pubmed/27225129	Genome-wide association study identifies 74 loci associated with educational attainment.	Educational attainment (years of education)	405,072 European ancestry individuals	NA	7q11.22	NR	CALN1			83698			rs756912-T	intron_variant	0	0.5217	1e-09		0.0135404	NR unit decrease	Affymetrix, Illumina, Perlegen [~ 9300000] (imputed)	N
73	rs56150095	7	71751316	rs12699131	2011-10-17	21926974	Ripke S	2011-09-18	Nat Genet	www.ncbi.nlm.nih.gov/pubmed/21926974	Genome-wide association study identifies five new schizophrenia loci.	Schizophrenia	9,394 European ancestry cases, 12,462 European ancestry controls	8,442 European ancestry cases, 21,397 European ancestry controls	7q11.22	NR	CALN1			83698			rs12699131-?	intron_variant	0	NR	2e-06		1.08	[1.04-1.11]	Affymetrix, Illumina [1252901] (imputed)	N
73	rs56150095	7	71751316	rs12699131	2017-02-25	27225129	Okbay A	2016-05-26	Nature	www.ncbi.nlm.nih.gov/pubmed/27225129	Genome-wide association study identifies 74 loci associated with educational attainment.	Educational attainment (college completion)	280,007 European ancestry individuals	NA	7q11.22	NR	CALN1			83698			rs12699131-A	intron_variant	0	0.4801	3e-08		1.03319	[NR]	Affymetrix, Illumina, Perlegen [~ 9300000] (imputed)	N
74	rs1144	7	104756326	rs1142	2016-10-10	26691988	Fritsche LG	2015-12-21	Nat Genet	www.ncbi.nlm.nih.gov/pubmed/26691988	A large genome-wide association study of age-related macular degeneration highlights contributions of rare and common variants.	Advanced age-related macular degeneration	16,144 European ancestry cases, 17,832 European ancestry controls	473 Asian ancestry cases, 1,099 Asian ancestry controls, 52 African ancestry cases, 361 African ancestry cases, 254 other non-European ancestry cases, 694 other non-European ancestry controls	7q22.3	KMT2E, SRPK2	SRPK2			6733			rs1142-?	intron_variant	0	NR	1e-09	(EA)	1.11		Illumina [12023830] (imputed)	N
74	rs1144	7	104756355	rs1144	2017-05-23	25673412	Shungin D	2015-02-12	Nature	www.ncbi.nlm.nih.gov/pubmed/25673412	New genetic loci link adipose and insulin biology to body fat distribution.	Waist circumference adjusted for body mass index	up to 56,910 European ancestry men, up to 86,570 European ancestry women	up to 36,570 European ancestry men, 30,172 European ancestry women, 915 Filipino ancestry men, 735 Filipino ancestry women, 2,351 African American/Afro-Caribbean ancestry men, 6,258 African American/Afro-Caribbean ancestry women, 2,285 South Asian ancestry men, 506 South Asian ancestry women, 195 Seychellois ancestry men, 266 Seychellois ancestry women	7q22.3	SRPK2	SRPK2			6733			rs1144-C	intron_variant	0	0.34	3e-08		0.019	unit increase	Affymetrix, Illumina, Perlegen [up to 2542447] (imputed)	N
74	rs1144	7	104756355	rs1144	2017-08-10	28443625	Justice AE	2017-04-26	Nat Commun	www.ncbi.nlm.nih.gov/pubmed/28443625	Genome-wide meta-analysis of 241,258 adults accounting for smoking behaviour identifies novel loci for obesity traits.	Waist circumference adjusted for BMI (adjusted for smoking behaviour)	97,400 European ancestry women, 63,892 European ancestry men, 5,829 European ancestry individuals, 10,500 African American/Afro-Caribbean ancestry women, 2,706 African American/Afro-Caribbean ancestry men, 1,030 Indian Asian ancestry women, 7,648 Indian Asian ancestry men, 1,793 Filipino ancestry women, 2,944 Hispanic/Latino ancestry women, 1,764 Hispanic/Latino ancestry men	21,496 European ancestry women, 24,385 European ancestry men, 118,364 European ancestry individuals, 2,326 African American/Afro-Caribbean ancestry women, 855 African American/Afro-Caribbean ancestry men	7q22.3	SRPK2	SRPK2			6733			rs1144-T	intron_variant	0	0.6579	5e-06		0.0165	[0.0094-0.0236] unit decrease	Affymetrix, Illumina, Perlegen [up to 2800000] (imputed)	N
74	rs1144	7	104929064	rs6466055	2015-04-16	25056061	Ripke S	2014-07-22	Nature	www.ncbi.nlm.nih.gov/pubmed/25056061	Biological insights from 108 schizophrenia-associated genetic loci.	Schizophrenia	32,405 European ancestry cases, 42,221 European ancestry controls, 1,235 European ancestry cases and 1,235 European ancestry controls from 1235 parent-offspring trios, 1,836 East Asian ancestry cases, 3,383 East Asian ancestry controls	1,513 European ancestry cases, 66,236 European ancestry controls	7q22.3	MLL5, PUS7, SRPK2	SRPK2			6733			rs6466055-A	intron_variant	0	0.332	1e-09		1.068	[1.046-1.091]	Affymetrix, Illumina [9005918] (imputed)	N
74	rs1144	7	104929064	rs6466055	2016-07-23	26198764	Goes FS	2015-07-21	Am J Med Genet B Neuropsychiatr Genet	www.ncbi.nlm.nih.gov/pubmed/26198764	Genome-wide association study of schizophrenia in Ashkenazi Jews.	Schizophrenia	592 Ashkenazi Jewish ancestry cases, 505 Ashkenazi Jewish ancestry controls, 36,989 cases, 113,075 controls	NA	7q22.3	NR	SRPK2			6733			rs6466055-A	intron_variant	0	NR	1e-09		1.07	[NR]	Illumina [7158791] (imputed)	N
75	rs11764631	7	127164958	rs6467136	2012-01-18	22158537	Cho YS	2011-12-11	Nat Genet	www.ncbi.nlm.nih.gov/pubmed/22158537	Meta-analysis of genome-wide association studies identifies eight new loci for type 2 diabetes in east Asians.	Type 2 diabetes	5,999 East Asian ancestry cases, 9,001 East Asian ancestry controls, 794 Malay ancestry cases, 1,240 Malay ancestry controls, 159 Filipino ancestry cases, 1,624 Filipino ancestry controls	18,127 East Asian ancestry cases, 17,746 East Asian ancestry controls	7q32.1	PAX4, GCC1	LOC105375490			105375490			rs6467136-G	intergenic_variant	0	0.79	5e-11		1.11	[1.07â€“1.14]	Affymetrix, Illumina [2626356] (imputed)	N
75	rs10273635	7	127178162	rs4731367	2016-12-01	27015805	Pilling LC	2016-03-23	Aging (Albany NY)	www.ncbi.nlm.nih.gov/pubmed/27015805	Human longevity is influenced by many genetic variants: evidence from 75,000 UK Biobank participants.	Parental longevity (mother's age at death)	52,776 middle-aged British individuals	NA	7q32.1	NR	LOC105375490			105375490			rs4731367-?	intergenic_variant	0	NR	9e-06		0.023252	[0.013-0.033] unit increase	Affymetrix [9658292] (imputed)	N
75	rs61544985	7	127201664	rs62481355	2016-12-01	26818947	Imamura M	2016-01-28	Nat Commun	www.ncbi.nlm.nih.gov/pubmed/26818947	Genome-wide association studies in the Japanese population identify seven novel loci for type 2 diabetes.	Type 2 diabetes	15,463 Japanese ancestry cases, 26,183 Japanese ancestry controls	20,490 East Asian ancestry cases, 22,922 East Asian ancestry controls, 38,947 European ancestry cases, 121,903 European ancestry controls, 10,587 South Asian ancestry cases, 14,378 South Asian ancestry controls, 3,848 Mexican/Latino cases, 4,366 Mexican/Latino controls	7q32.1	GCC1	LOC105375490 - GCC1	105375490	79571		22701	19018	rs62481355-T	intergenic_variant	1	NR	3e-07	(Japanese)	1.0909	[1.05521-1.12779]	Illumina [7521072] (imputed)	N
76	rs4731992	7	133302345	rs17167170	2017-02-24	27225129	Okbay A	2016-05-26	Nature	www.ncbi.nlm.nih.gov/pubmed/27225129	Genome-wide association study identifies 74 loci associated with educational attainment.	Educational attainment (years of education)	405,072 European ancestry individuals	NA	7q33	NR	EXOC4			60412			rs17167170-A	intron_variant	0	0.7972	2e-12		0.01948	NR unit increase	Affymetrix, Illumina, Perlegen [~ 9300000] (imputed)	N
76	rs4731992	7	133505101	rs7781266	2017-02-25	27225129	Okbay A	2016-05-26	Nature	www.ncbi.nlm.nih.gov/pubmed/27225129	Genome-wide association study identifies 74 loci associated with educational attainment.	Educational attainment (college completion)	280,007 European ancestry individuals	NA	7q33	NR	LOC101928861, EXOC4			101928861, 60412			rs7781266-?	intron_variant	0	0.7803	3e-09		1.04292	[NR]	Affymetrix, Illumina, Perlegen [~ 9300000] (imputed)	N
76	rs3823572	7	133630463	rs4728302	2017-07-18	28530673	Sniekers S	2017-05-22	Nat Genet	www.ncbi.nlm.nih.gov/pubmed/28530673	Genome-wide association meta-analysis of 78,308 individuals identifies new loci and genes influencing human intelligence.	Intelligence	up to 58,799 European ancestry adults, up to 19,509 European ancestry children	NA	7q33	EXOC4, LOC101928861	EXOC4			60412			rs4728302-T	intron_variant	0	0.5973	2e-09		5.967	z score decrease	Affymetrix, Illumina [12104294] (imputed)	N
76	rs3823572	7	133630463	rs4728302	2017-07-18	28530673	Sniekers S	2017-05-22	Nat Genet	www.ncbi.nlm.nih.gov/pubmed/28530673	Genome-wide association meta-analysis of 78,308 individuals identifies new loci and genes influencing human intelligence.	Intelligence	up to 58,799 European ancestry adults, up to 19,509 European ancestry children	NA	7q33	EXOC4, LOC101928861	EXOC4			60412			rs4728302-T	intron_variant	0	0.5973	4e-07	(Adults)	5.08	z score decrease	Affymetrix, Illumina [12104294] (imputed)	N
83	rs13262595	8	143312933	rs4129585	2014-03-18	23974872	Ripke S	2013-08-25	Nat Genet	www.ncbi.nlm.nih.gov/pubmed/23974872	Genome-wide association analysis identifies 13 new risk loci for schizophrenia.	Schizophrenia	5,001 European ancestry cases, 6,243 European ancestry controls, 8,832 cases, 12,067 controls	4,801 European ancestry cases, 4,741 European ancestry controls, 2,612 European and unknown ancestry cases, 15,021 European and unknown ancestry controls, 581 trios	8q24.3	TSNARE1	LOC107986983, TSNARE1			107986983, 203062			rs4129585-A	intron_variant	0	0.439	2e-10		1.091	[1.06-1.12]	Affymetrix, Illumina [9871789]	N
83	rs13262595	8	143312933	rs4129585	2015-04-16	25056061	Ripke S	2014-07-22	Nature	www.ncbi.nlm.nih.gov/pubmed/25056061	Biological insights from 108 schizophrenia-associated genetic loci.	Schizophrenia	32,405 European ancestry cases, 42,221 European ancestry controls, 1,235 European ancestry cases and 1,235 European ancestry controls from 1235 parent-offspring trios, 1,836 East Asian ancestry cases, 3,383 East Asian ancestry controls	1,513 European ancestry cases, 66,236 European ancestry controls	8q24.3	TSNARE1	LOC107986983, TSNARE1			107986983, 203062			rs4129585-A	intron_variant	0	0.424	2e-15		1.087	[1.065-1.109]	Affymetrix, Illumina [9005918] (imputed)	N
83	rs13262595	8	143312933	rs4129585	2016-07-23	26198764	Goes FS	2015-07-21	Am J Med Genet B Neuropsychiatr Genet	www.ncbi.nlm.nih.gov/pubmed/26198764	Genome-wide association study of schizophrenia in Ashkenazi Jews.	Schizophrenia	592 Ashkenazi Jewish ancestry cases, 505 Ashkenazi Jewish ancestry controls, 36,989 cases, 113,075 controls	NA	8q24.3	NR	LOC107986983, TSNARE1			107986983, 203062			rs4129585-A	intron_variant	0	NR	8e-14		1.08	[NR]	Illumina [7158791] (imputed)	N
84	rs750472	8	145677011	rs2721195	2017-03-22	27798627	Barban N	2016-10-31	Nat Genet	www.ncbi.nlm.nih.gov/pubmed/27798627	Genome-wide analysis identifies 12 loci influencing human reproductive behavior.	Age at first birth	189,656 European ancestry women, 48,408 European ancestry men		8q24.3	CYHR1, GPT, RECQL4, PPP1R16A	CYHR1			50626			rs2721195-T	non_coding_transcript_exon_variant	0	0.469	6e-07		0.073	NR unit decrease	Illumina [2400000] (imputed)	N
84	rs750472	8	145677011	rs2721195	2017-03-22	27798627	Barban N	2016-10-31	Nat Genet	www.ncbi.nlm.nih.gov/pubmed/27798627	Genome-wide analysis identifies 12 loci influencing human reproductive behavior.	Age at first birth	189,656 European ancestry women, 48,408 European ancestry men		8q24.3	CYHR1, GPT, RECQL4, PPP1R16A	CYHR1			50626			rs2721195-T	non_coding_transcript_exon_variant	0	0.469	6e-09	(women)	0.099	NR unit decrease	Illumina [2400000] (imputed)	N
84	rs750472	8	145686505	rs11774212	2017-02-24	27225129	Okbay A	2016-05-26	Nature	www.ncbi.nlm.nih.gov/pubmed/27225129	Genome-wide association study identifies 74 loci associated with educational attainment.	Educational attainment (years of education)	405,072 European ancestry individuals	NA	8q24.3	NR	CYHR1			50626			rs11774212-T	intron_variant	0	0.5182	2e-12		0.0159358	NR unit increase	Affymetrix, Illumina, Perlegen [~ 9300000] (imputed)	N
84	rs750472	8	145744429	rs2721173	2015-05-08	25201988	Rietveld CA	2014-09-08	Proc Natl Acad Sci U S A	www.ncbi.nlm.nih.gov/pubmed/25201988	Common genetic variants associated with cognitive performance identified using the proxy-phenotype method.	Educational attainment	106,736 European ancestry individuals	NA	8q24.3	GPT, PPP1R16A, VPS28, MFSD3, RECQL4, LRRC14, ARHGAP39, FOXH1, KIFC2, CYHR1, CPSF1, SCRT1, LRRC24	LRRC14			9684			rs2721173-T	intron_variant	0	0.473	9e-06		0.02	[NR] unit decrease	Affymetrix, Illumina [NR] (imputed)	N
85	rs11793831	9	23347865	rs12553324	2016-12-21	27046643	Davies G	2016-04-05	Mol Psychiatry	www.ncbi.nlm.nih.gov/pubmed/27046643	Genome-wide association study of cognitive functions and educational attainment in UK Biobank (N=112â€‰151).	Educational attainment	111,114 European ancestry individuals	NA	9p21.3	Intergenic	LOC107987055 - LOC105369298	107987055	105369298		242692	134873	rs12553324-?	intron_variant	1	NR	1e-13		0.0319647	[NR] unit increase	Affymetrix [~ 17300000] (imputed)	N
85	rs11793831	9	23347865	rs12553324	2017-03-10	27329760	Hou L	2016-06-21	Hum Mol Genet	www.ncbi.nlm.nih.gov/pubmed/27329760	Genome-wide association study of 40,000 individuals identifies two novel loci associated with bipolar disorder.	Bipolar disorder	7,647 European ancestry cases, 27,303 European ancestry controls	2,137 European ancestry cases, 3,168 European ancestry controls	9p21.3	intergenic	LOC107987055 - LOC105369298	107987055	105369298		242692	134873	rs12553324-C	intron_variant	1	0.59	6e-09		1.12	[1.07-1.16]	Affymetrix, Illumina [9692718] (imputed)	N
85	rs11793831	9	23358081	rs7029201	2017-02-24	27225129	Okbay A	2016-05-26	Nature	www.ncbi.nlm.nih.gov/pubmed/27225129	Genome-wide association study identifies 74 loci associated with educational attainment.	Educational attainment (years of education)	405,072 European ancestry individuals	NA	9p21.3	NR	LOC107987055 - LOC105369298	107987055	105369298		252908	124657	rs7029201-A	intron_variant	1	0.4113	7e-27		0.0246964	NR unit increase	Affymetrix, Illumina, Perlegen [~ 9300000] (imputed)	N
85	rs11793831	9	23358875	rs13294439	2017-02-25	27225129	Okbay A	2016-05-26	Nature	www.ncbi.nlm.nih.gov/pubmed/27225129	Genome-wide association study identifies 74 loci associated with educational attainment.	Educational attainment (college completion)	280,007 European ancestry individuals	NA	9p21.3	NR	LOC107987055 - LOC105369298	107987055	105369298		253702	123863	rs13294439-?	intron_variant	1	0.4092	1e-14		1.04832	[NR]	Affymetrix, Illumina, Perlegen [~ 9300000] (imputed)	N
85	rs10733389	9	23378220	rs10733389	2017-03-17	27089181	Okbay A	2016-04-18	Nat Genet	www.ncbi.nlm.nih.gov/pubmed/27089181	Genetic variants associated with subjective well-being, depressive symptoms, and neuroticism identified through genome-wide analyses.	Neuroticism	170,911 European ancestry individuals	NA	9p21.3	NR	LOC107987055 - LOC105369298	107987055	105369298		273047	104518	rs10733389-A	intron_variant	1	0.384	8e-08		0.0188852	[0.012-0.026] unit increase	Affymetrix [up to 6544775] (imputed)	N
87	rs7873907	9	92219260	rs3138493	2016-10-05	26561523	de Vries PS	2015-11-10	Hum Mol Genet	www.ncbi.nlm.nih.gov/pubmed/26561523	A meta-analysis of 120,246 individuals identifies 18 new loci for fibrinogen concentration.	Fibrinogen levels	120,246 European ancestry individuals	NA	9q22.2	GADD45G	LOC105376139			105376139			rs3138493-T	upstream_gene_variant	0	0.48	3e-09		0.0054	NR unit decrease	Affymetrix, Illumina [~ 10700000] (imputed)	N
87	rs7873907	9	92219260	rs3138493	2017-06-01	28107422	de Vries PS	2017-01-20	PLoS One	www.ncbi.nlm.nih.gov/pubmed/28107422	Comparison of HapMap and 1000 Genomes Reference Panels in a Large-Scale Genome-Wide Association Study.	Fibrinogen levels	91,953 European ancestry individuals (imputed to 1000 Genomes)		9q22.2	GADD45G	LOC105376139			105376139			rs3138493-?	upstream_gene_variant	0	NR	4e-09		0.006	unit increase	Affymetrix, Illumina [10883314] (imputed)	N
87	rs7873907	9	92225483	rs7873907	2017-06-01	28107422	de Vries PS	2017-01-20	PLoS One	www.ncbi.nlm.nih.gov/pubmed/28107422	Comparison of HapMap and 1000 Genomes Reference Panels in a Large-Scale Genome-Wide Association Study.	Fibrinogen levels	91,953 European ancestry individuals (imputed to HapMap)		9q22.2	GADD45G, UNQ6494	GADD45G - UNQ6494	10912	100129066		4013	29215	rs7873907-?	downstream_gene_variant	1	NR	5e-09		0.006	unit increase	Affymetrix, Illumina [2749429] (imputed)	N
88	rs3914453	9	120676437	rs4837523	2017-05-23	28203683	Heit JA	2017-02-16	Thromb Haemost	www.ncbi.nlm.nih.gov/pubmed/28203683	Identification of unique venous thromboembolism-susceptibility variants in African-Americans.	Venous thromboembolism adjusted for sickle cell variant rs77121243-T	393 African American cases, 4,941 African American controls.	NR	9q33.1	LOC389787	LOC105376243 - LOC105376246	105376243	105376246		37185	83489	rs4837523-?	intergenic_variant	1	0.66	4e-06		1.55039		Affymetrix, Illumina [14074516] (imputed)	N
89	rs10761765	10	65006456	rs6479891	2012-03-30	22354554	Thompson SD	2012-02-21	Arthritis Rheum	www.ncbi.nlm.nih.gov/pubmed/22354554	Genome-wide association analysis of juvenile idiopathic arthritis identifies a new susceptibility locus at chromosomal region 3q13.	Arthritis (juvenile idiopathic)	814 European ancestry cases, 658 European ancestry controls, 2,400 controls	1,744 European ancestry cases, 7,010 European ancestry controls	10q21.3	JMJD1C	JMJD1C			221037			rs6479891-T	intron_variant	0	0.14	2e-07		1.19	[1.07-1.32]	Affymetrix [561137]	N
89	rs10761765	10	65101071	rs10761745	2017-07-11	28406950	Kim J	2017-04-13	PLoS One	www.ncbi.nlm.nih.gov/pubmed/28406950	Interaction of iron status with single nucleotide polymorphisms on incidence of type 2 diabetes.	Type 2 diabetes	1,895 Korean ancestry cases, 6,040 Korean ancestry controls	NA	10q21.3	JMJD1C	JMJD1C			221037			rs10761745-?	intron_variant	0	NR	5e-06		1.2		Affymetrix [352228]	N
89	rs10761765	10	65315397	rs12411988	2012-03-30	22354554	Thompson SD	2012-02-21	Arthritis Rheum	www.ncbi.nlm.nih.gov/pubmed/22354554	Genome-wide association analysis of juvenile idiopathic arthritis identifies a new susceptibility locus at chromosomal region 3q13.	Arthritis (juvenile idiopathic)	814 European ancestry cases, 658 European ancestry controls, 2,400 controls	1,744 European ancestry cases, 7,010 European ancestry controls	10q21.3	REEP3	REEP3			221035			rs12411988-C	intron_variant	0	0.13	3e-07		1.18	[1.06-1.31]	Affymetrix [561137]	N
91	rs11596211	10	101861435	rs11597390	2008-12-01	18940312	Yuan X	2008-10-10	Am J Hum Genet	www.ncbi.nlm.nih.gov/pubmed/18940312	Population-based genome-wide association studies reveal six loci influencing plasma levels of liver enzymes.	Liver enzyme levels	7,751 European ancestry individuals	1,005 European ancestry individuals, 3,669 Asian Indian ancestry individuals	10q24.31	CHUK, ERLIN1, CPN1	CPN1 - TPM4P1	1369	644566		19793	12743	rs11597390-A	downstream_gene_variant	1	0.36	2e-08	(ALT)	0.04	[0.025-0.053] U/L decrease	Affymetrix, Illumina [up to 496032]	N
91	rs1408579	10	102038641	rs61871342	2017-07-13	28537254	Tsoi LC	2017-05-24	Nat Commun	www.ncbi.nlm.nih.gov/pubmed/28537254	Large scale meta-analysis characterizes genetic architecture for common psoriasis associated variants.	Psoriasis	Up to 11,988 European ancestry cases, up to 275,335 European ancestry controls	7,044 European ancestry cases, 11,434 European ancestry controls	10q24.31	CHUK	BLOC1S2			282991			rs61871342-G	intron_variant	0	0.55	2e-09		1.1		Illumina, Perlegen [9113515] (imputed)	N
92	rs117793008	10	103550281	rs149613931	2017-02-24	27225129	Okbay A	2016-05-26	Nature	www.ncbi.nlm.nih.gov/pubmed/27225129	Genome-wide association study identifies 74 loci associated with educational attainment.	Educational attainment (years of education)	405,072 European ancestry individuals	NA	10q24.32	NR	MGEA5			10724			rs149613931-T	intron_variant	0	0.0566	6e-09		0.0280581	NR unit decrease	Affymetrix, Illumina, Perlegen [~ 9300000] (imputed)	N
92	rs117793008	10	103698705	rs34014631	2015-06-23	23870195	Wojczynski MK	2013-07-19	BMC Med Genet	www.ncbi.nlm.nih.gov/pubmed/23870195	Genetics of coronary artery calcification among African Americans, a meta-analysis.	Coronary artery calcification	5,823 African American individuals	9,992 European ancestry individuals	10q24.32	C10orf76	C10orf76			79591			rs34014631-A	intron_variant	0	0.06	4e-06	(AA)	0.47	[0.27-0.67] unit decrease	Affymetrix, Illumina [up to 2727966] (imputed)	N
92	rs1044258	10	103802408	rs11191193	2015-05-08	25201988	Rietveld CA	2014-09-08	Proc Natl Acad Sci U S A	www.ncbi.nlm.nih.gov/pubmed/25201988	Common genetic variants associated with cognitive performance identified using the proxy-phenotype method.	Educational attainment	106,736 European ancestry individuals	NA	10q24.32	intergenic	C10orf76			79591			rs11191193-A	intron_variant	0	0.653	6e-07		0.023	[NR] unit increase	Affymetrix, Illumina [NR] (imputed)	N
92	rs749694	10	103816828	rs73344830	2017-02-24	27225129	Okbay A	2016-05-26	Nature	www.ncbi.nlm.nih.gov/pubmed/27225129	Genome-wide association study identifies 74 loci associated with educational attainment.	Educational attainment (years of education)	405,072 European ancestry individuals	NA	10q24.32	NR	C10orf76 - HPS6	79591	79803		834	8296	rs73344830-A	upstream_gene_variant	1	0.4215	1e-11		0.0153789	NR unit increase	Affymetrix, Illumina, Perlegen [~ 9300000] (imputed)	N
92	rs61874768	10	103880118	rs61874768	2017-02-24	27225129	Okbay A	2016-05-26	Nature	www.ncbi.nlm.nih.gov/pubmed/27225129	Genome-wide association study identifies 74 loci associated with educational attainment.	Educational attainment (years of education)	405,072 European ancestry individuals	NA	10q24.32	NR	LDB1			8861			rs61874768-T	5_prime_UTR_variant	0	0.1828	4e-08		0.0160442	NR unit decrease	Affymetrix, Illumina, Perlegen [~ 9300000] (imputed)	N
92	rs10786662	10	103989812	rs10786662	2017-02-24	27225129	Okbay A	2016-05-26	Nature	www.ncbi.nlm.nih.gov/pubmed/27225129	Genome-wide association study identifies 74 loci associated with educational attainment.	Educational attainment (years of education)	405,072 European ancestry individuals	NA	10q24.32	NR	ELOVL3 - PITX3	83401	5309		466	134	rs10786662-C	downstream_gene_variant	1	0.5533	5e-14		0.0168711	NR unit decrease	Affymetrix, Illumina, Perlegen [~ 9300000] (imputed)	N
92	rs10786662	10	104050006	rs2485376	2015-04-16	24952745	Arking DE	2014-06-22	Nat Genet	www.ncbi.nlm.nih.gov/pubmed/24952745	Genetic association study of QT interval highlights role for calcium signaling pathways in myocardial repolarization.	QT interval	Up to 70,389 European ancestry individuals, up to 672 Orcadian individuals	Up to 33,316 European ancestry individuals	10q24.32	GBF1	GBF1			8729			rs2485376-A	intron_variant	0	0.391	3e-08		0.56	[0.36-0.76] unit decrease	Affymetrix, Illumina [~ 2500000] (imputed)	N
92	rs11191270	10	104124055	rs12354486	2017-02-25	27225129	Okbay A	2016-05-26	Nature	www.ncbi.nlm.nih.gov/pubmed/27225129	Genome-wide association study identifies 74 loci associated with educational attainment.	Educational attainment (college completion)	280,007 European ancestry individuals	NA	10q24.32	NR	GBF1			8729			rs12354486-C	intron_variant	0	0.8114	2e-08		1.04275	[NR]	Affymetrix, Illumina, Perlegen [~ 9300000] (imputed)	N
95	rs3817334	11	47650993	rs3817334	2010-11-17	20935630	Speliotes EK	2010-10-10	Nat Genet	www.ncbi.nlm.nih.gov/pubmed/20935630	Association analyses of 249,796 individuals reveal 18 new loci associated with body mass index.	Body mass index	Up to 123,865 European ancestry individuals	Up to 125,931 European ancestry individuals	11p11.2	MTCH2, NDUFS3, CUGBP1	MTCH2			23788			rs3817334-T	intron_variant	0	0.41	2e-12		0.06	[0.02-0.10] kg/m2 increase	Affymetrix, Illumina, Perlegen [~ 2800000] (imputed)	N
95	rs3817334	11	47650993	rs3817334	2016-01-27	25673413	Locke AE	2015-02-12	Nature	www.ncbi.nlm.nih.gov/pubmed/25673413	Genetic studies of body mass index yield new insights for obesity biology.	Body mass index	up to 104,666 European ancestry male individuals, up to 132,115 European ancestry female individuals, 370 African American male individuals, 517 African American female individuals, 512 Hispanic male individuals, 764 Hispanic female individuals	up to 48,274 European ancestry male individuals, up to 39,864 European ancestry female individuals, 2,441 African American or Afro-Caribbean male individuals, 6,314 African American or Afro-Caribbean female individuals, 919 Filipino male individuals, 828 Filipino female individuals, 205 Seychelles male individuals, 287 Seychelles female individuals, 2,964 South Asian ancestry male individuals, 65…	11p11.2	MTCH2	MTCH2			23788			rs3817334-T	intron_variant	0	0.401	1e-17		0.026	[0.02-0.031] kg/m2 increase	Affymetrix, Illumina [2550021]	N
95	rs3817334	11	47650993	rs3817334	2016-01-27	25673413	Locke AE	2015-02-12	Nature	www.ncbi.nlm.nih.gov/pubmed/25673413	Genetic studies of body mass index yield new insights for obesity biology.	Body mass index	up to 104,666 European ancestry male individuals, up to 132,115 European ancestry female individuals, 370 African American male individuals, 517 African American female individuals, 512 Hispanic male individuals, 764 Hispanic female individuals	up to 48,274 European ancestry male individuals, up to 39,864 European ancestry female individuals, 2,441 African American or Afro-Caribbean male individuals, 6,314 African American or Afro-Caribbean female individuals, 919 Filipino male individuals, 828 Filipino female individuals, 205 Seychelles male individuals, 287 Seychelles female individuals, 2,964 South Asian ancestry male individuals, 65…	11p11.2	MTCH2	MTCH2			23788			rs3817334-T	intron_variant	0	0.405	2e-10	(EA, men)	0.026	[0.018-0.034] kg/m2 increase	Affymetrix, Illumina [2550021]	N
95	rs3817334	11	47650993	rs3817334	2016-01-27	25673413	Locke AE	2015-02-12	Nature	www.ncbi.nlm.nih.gov/pubmed/25673413	Genetic studies of body mass index yield new insights for obesity biology.	Body mass index	up to 104,666 European ancestry male individuals, up to 132,115 European ancestry female individuals, 370 African American male individuals, 517 African American female individuals, 512 Hispanic male individuals, 764 Hispanic female individuals	up to 48,274 European ancestry male individuals, up to 39,864 European ancestry female individuals, 2,441 African American or Afro-Caribbean male individuals, 6,314 African American or Afro-Caribbean female individuals, 919 Filipino male individuals, 828 Filipino female individuals, 205 Seychelles male individuals, 287 Seychelles female individuals, 2,964 South Asian ancestry male individuals, 65…	11p11.2	MTCH2	MTCH2			23788			rs3817334-T	intron_variant	0	0.407	5e-17	(EA)	0.026	[0.02-0.032] kg/m2 increase	Affymetrix, Illumina [2550021]	N
95	rs3817334	11	47650993	rs3817334	2016-01-27	25673413	Locke AE	2015-02-12	Nature	www.ncbi.nlm.nih.gov/pubmed/25673413	Genetic studies of body mass index yield new insights for obesity biology.	Body mass index	up to 104,666 European ancestry male individuals, up to 132,115 European ancestry female individuals, 370 African American male individuals, 517 African American female individuals, 512 Hispanic male individuals, 764 Hispanic female individuals	up to 48,274 European ancestry male individuals, up to 39,864 European ancestry female individuals, 2,441 African American or Afro-Caribbean male individuals, 6,314 African American or Afro-Caribbean female individuals, 919 Filipino male individuals, 828 Filipino female individuals, 205 Seychelles male individuals, 287 Seychelles female individuals, 2,964 South Asian ancestry male individuals, 65…	11p11.2	MTCH2	MTCH2			23788			rs3817334-T	intron_variant	0	0.409	2e-11	(EA, women)	0.027	[0.019-0.034] kg/m2 increase	Affymetrix, Illumina [2550021]	N
95	rs3817334	11	47650993	rs3817334	2017-08-10	28443625	Justice AE	2017-04-26	Nat Commun	www.ncbi.nlm.nih.gov/pubmed/28443625	Genome-wide meta-analysis of 241,258 adults accounting for smoking behaviour identifies novel loci for obesity traits.	BMI (adjusted for smoking behaviour)	98,173 European ancestry women, 64,373 European ancestry men, 5,829 European ancestry individuals, 10,500 African American/Afro-Caribbean ancestry women, 2,706 African American/Afro-Caribbean ancestry men, 1,030 Indian Asian ancestry women, 7,648 Indian Asian ancestry men, 1,793 Filipino ancestry women, 2,944 Hispanic/Latino ancestry women, 1,764 Hispanic/Latino ancestry men	21,496 European ancestry women, 24,385 European ancestry men, 118,364 European ancestry individuals, 2,326 African American/Afro-Caribbean ancestry women, 855 African American/Afro-Caribbean ancestry men	11p11.2	MTCH2	MTCH2			23788			rs3817334-T	intron_variant	0	0.3933	1e-11		0.0223	[0.016-0.029] kg/m2 increase	Affymetrix, Illumina, Perlegen [up to 2800000] (imputed)	N
95	rs3817334	11	47650993	rs3817334	2017-08-10	28443625	Justice AE	2017-04-26	Nat Commun	www.ncbi.nlm.nih.gov/pubmed/28443625	Genome-wide meta-analysis of 241,258 adults accounting for smoking behaviour identifies novel loci for obesity traits.	BMI (adjusted for smoking behaviour)	98,173 European ancestry women, 64,373 European ancestry men, 5,829 European ancestry individuals, 10,500 African American/Afro-Caribbean ancestry women, 2,706 African American/Afro-Caribbean ancestry men, 1,030 Indian Asian ancestry women, 7,648 Indian Asian ancestry men, 1,793 Filipino ancestry women, 2,944 Hispanic/Latino ancestry women, 1,764 Hispanic/Latino ancestry men	21,496 European ancestry women, 24,385 European ancestry men, 118,364 European ancestry individuals, 2,326 African American/Afro-Caribbean ancestry women, 855 African American/Afro-Caribbean ancestry men	11p11.2	MTCH2	MTCH2			23788			rs3817334-T	intron_variant	0	0.3933	1e-07	(men)	0.0254	[0.016-0.035] kg/m2 increase	Affymetrix, Illumina, Perlegen [up to 2800000] (imputed)	N
95	rs3817334	11	47650993	rs3817334	2017-08-10	28443625	Justice AE	2017-04-26	Nat Commun	www.ncbi.nlm.nih.gov/pubmed/28443625	Genome-wide meta-analysis of 241,258 adults accounting for smoking behaviour identifies novel loci for obesity traits.	BMI (adjusted for smoking behaviour)	98,173 European ancestry women, 64,373 European ancestry men, 5,829 European ancestry individuals, 10,500 African American/Afro-Caribbean ancestry women, 2,706 African American/Afro-Caribbean ancestry men, 1,030 Indian Asian ancestry women, 7,648 Indian Asian ancestry men, 1,793 Filipino ancestry women, 2,944 Hispanic/Latino ancestry women, 1,764 Hispanic/Latino ancestry men	21,496 European ancestry women, 24,385 European ancestry men, 118,364 European ancestry individuals, 2,326 African American/Afro-Caribbean ancestry women, 855 African American/Afro-Caribbean ancestry men	11p11.2	MTCH2	MTCH2			23788			rs3817334-T	intron_variant	0	0.3933	2e-06	(women)	0.02	[0.012-0.028] kg/m2 increase	Affymetrix, Illumina, Perlegen [up to 2800000] (imputed)	N
95	rs3817334	11	47650993	rs3817334	2017-08-10	28443625	Justice AE	2017-04-26	Nat Commun	www.ncbi.nlm.nih.gov/pubmed/28443625	Genome-wide meta-analysis of 241,258 adults accounting for smoking behaviour identifies novel loci for obesity traits.	BMI in non-smokers	77,279 European ancestry women, 47,280 European ancestry men, 4,856 European ancestry individuals, 8,799 African American/Afro-Caribbean ancestry women, 1,803 African American/Afro-Caribbean ancestry men, 1,020 Indian Asian ancestry women, 6,691 Indian Asian ancestry men, 1,526 Filipino ancestry women, 2,469 Hispanic/Latino ancestry women, 1,318 Hispanic/Latino ancestry men	16,011 European ancestry women, 17,912 European ancestry men, 105,218 European ancestry individuals, 2,073 African American/Afro-Caribbean ancestry women, 647 African American/Afro-Caribbean ancestry men	11p11.2	MTCH2	MTCH2			23788			rs3817334-T	intron_variant	0	0.3933	1e-08		0.0212	[0.014-0.028] kg/m2 increase	Affymetrix, Illumina, Perlegen [up to 2800000] (imputed)	N
95	rs3817334	11	47650993	rs3817334	2017-08-10	28443625	Justice AE	2017-04-26	Nat Commun	www.ncbi.nlm.nih.gov/pubmed/28443625	Genome-wide meta-analysis of 241,258 adults accounting for smoking behaviour identifies novel loci for obesity traits.	BMI in non-smokers	77,279 European ancestry women, 47,280 European ancestry men, 4,856 European ancestry individuals, 8,799 African American/Afro-Caribbean ancestry women, 1,803 African American/Afro-Caribbean ancestry men, 1,020 Indian Asian ancestry women, 6,691 Indian Asian ancestry men, 1,526 Filipino ancestry women, 2,469 Hispanic/Latino ancestry women, 1,318 Hispanic/Latino ancestry men	16,011 European ancestry women, 17,912 European ancestry men, 105,218 European ancestry individuals, 2,073 African American/Afro-Caribbean ancestry women, 647 African American/Afro-Caribbean ancestry men	11p11.2	MTCH2	MTCH2			23788			rs3817334-T	intron_variant	0	0.3933	6e-06	(men)	0.0245	[0.014-0.035] kg/m2 increase	Affymetrix, Illumina, Perlegen [up to 2800000] (imputed)	N
95	rs3817334	11	47650993	rs3817334	2017-08-10	28443625	Justice AE	2017-04-26	Nat Commun	www.ncbi.nlm.nih.gov/pubmed/28443625	Genome-wide meta-analysis of 241,258 adults accounting for smoking behaviour identifies novel loci for obesity traits.	Body mass index (joint analysis main effects and smoking interaction)	98,173 European ancestry women, 64,373 European ancestry men, 5,829 European ancestry individuals, 10,500 African American/Afro-Caribbean ancestry women, 2,706 African American/Afro-Caribbean ancestry men, 1,030 Indian Asian ancestry women, 7,648 Indian Asian ancestry men, 1,793 Filipino ancestry women, 2,944 Hispanic/Latino ancestry women, 1,764 Hispanic/Latino ancestry men	21,496 European ancestry women, 24,385 European ancestry men, 118,364 European ancestry individuals, 2,326 African American/Afro-Caribbean ancestry women, 855 African American/Afro-Caribbean ancestry men	11p11.2	MTCH2	MTCH2			23788			rs3817334-T	intron_variant	0	0.3933	3e-06	(women)			Affymetrix, Illumina, Perlegen [up to 2800000] (imputed)	N
95	rs3817334	11	47650993	rs3817334	2017-08-10	28443625	Justice AE	2017-04-26	Nat Commun	www.ncbi.nlm.nih.gov/pubmed/28443625	Genome-wide meta-analysis of 241,258 adults accounting for smoking behaviour identifies novel loci for obesity traits.	Body mass index (joint analysis main effects and smoking interaction)	98,173 European ancestry women, 64,373 European ancestry men, 5,829 European ancestry individuals, 10,500 African American/Afro-Caribbean ancestry women, 2,706 African American/Afro-Caribbean ancestry men, 1,030 Indian Asian ancestry women, 7,648 Indian Asian ancestry men, 1,793 Filipino ancestry women, 2,944 Hispanic/Latino ancestry women, 1,764 Hispanic/Latino ancestry men	21,496 European ancestry women, 24,385 European ancestry men, 118,364 European ancestry individuals, 2,326 African American/Afro-Caribbean ancestry women, 855 African American/Afro-Caribbean ancestry men	11p11.2	MTCH2	MTCH2			23788			rs3817334-T	intron_variant	0	0.3933	4e-07	(men)			Affymetrix, Illumina, Perlegen [up to 2800000] (imputed)	N
95	rs3817334	11	47650993	rs3817334	2017-08-10	28443625	Justice AE	2017-04-26	Nat Commun	www.ncbi.nlm.nih.gov/pubmed/28443625	Genome-wide meta-analysis of 241,258 adults accounting for smoking behaviour identifies novel loci for obesity traits.	Body mass index (joint analysis main effects and smoking interaction)	98,173 European ancestry women, 64,373 European ancestry men, 5,829 European ancestry individuals, 10,500 African American/Afro-Caribbean ancestry women, 2,706 African American/Afro-Caribbean ancestry men, 1,030 Indian Asian ancestry women, 7,648 Indian Asian ancestry men, 1,793 Filipino ancestry women, 2,944 Hispanic/Latino ancestry women, 1,764 Hispanic/Latino ancestry men	21,496 European ancestry women, 24,385 European ancestry men, 118,364 European ancestry individuals, 2,326 African American/Afro-Caribbean ancestry women, 855 African American/Afro-Caribbean ancestry men	11p11.2	MTCH2	MTCH2			23788			rs3817334-T	intron_variant	0	0.3933	7e-12				Affymetrix, Illumina, Perlegen [up to 2800000] (imputed)	N
95	rs3817334	11	47663049	rs10838738	2009-01-12	19079261	Willer CJ	2008-12-14	Nat Genet	www.ncbi.nlm.nih.gov/pubmed/19079261	Six new loci associated with body mass index highlight a neuronal influence on body weight regulation.	Body mass index	32,387 European ancestry individuals	59,082 European ancestry individuals	11p11.2	MTCH2	MTCH2			23788			rs10838738-G	intron_variant	0	0.34	5e-09		0.07	[0.01-0.13] kg/m2 increase	Affymetrix, Illumina [2399588] (imputed)	N
95	rs3817334	11	47781306	rs7927771	2017-03-17	27089181	Okbay A	2016-04-18	Nat Genet	www.ncbi.nlm.nih.gov/pubmed/27089181	Genetic variants associated with subjective well-being, depressive symptoms, and neuroticism identified through genome-wide analyses.	Subjective well-being	298,420 Korculan (founder/genetic isolate), Split (founder/genetic isolate), Vis (founder/genetic isolate), Erasmus Rucphen (founder/genetic isolate) and other European ancestry individuals	NA	11p11.2	NR	FNBP4			23360			rs7927771-A	intron_variant	0	0.6579	4e-06		0.0129	[0.0074-0.0184] unit decrease	Affymetrix, Illumina, Perlegen [at least 5170349] (imputed)	N
96	rs7978070	12	14587301	rs3213764	2013-03-27	23359319	Jin G	2013-01-01	Neoplasia	www.ncbi.nlm.nih.gov/pubmed/23359319	Genome-wide association study identifies loci at ATF7IP and KLK2 associated with percentage of circulating free PSA.	Prostate-specific antigen levels	3,192 European ancestry individuals	1,722 European ancestry individuals	12p13.1	ATF7IP	ATF7IP			55729			rs3213764-G	missense_variant	0	0.467	2e-09		0.049	% increase	Illumina [642584]	N
96	rs7978070	12	14595756	rs7964899	2017-02-24	27225129	Okbay A	2016-05-26	Nature	www.ncbi.nlm.nih.gov/pubmed/27225129	Genome-wide association study identifies 74 loci associated with educational attainment.	Educational attainment (years of education)	405,072 European ancestry individuals	NA	12p13.1	NR	ATF7IP			55729			rs7964899-A	intron_variant	0	0.4446	4e-13		0.0161938	NR unit increase	Affymetrix, Illumina, Perlegen [~ 9300000] (imputed)	N
96	rs7978070	12	14653867	rs2900333	2010-07-12	20543847	Turnbull C	2010-06-13	Nat Genet	www.ncbi.nlm.nih.gov/pubmed/20543847	Variants near DMRT1, TERT and ATF7IP are associated with testicular germ cell cancer.	Testicular germ cell cancer	979 European ancestry cases, 4,947 European ancestry controls	664 European ancestry cases, 3,456 European ancestry controls	12p13.1	ATF7IP	ATF7IP			55729			rs2900333-C	3_prime_UTR_variant	0	0.62	6e-10		1.27	[1.12-1.44]	Illumina [298782]	N
96	rs7978070	12	14653867	rs2900333	2013-11-09	23666240	Ruark E	2013-05-12	Nat Genet	www.ncbi.nlm.nih.gov/pubmed/23666240	Identification of nine new susceptibility loci for testicular cancer, including variants near DAZL and PRDM14.	Testicular germ cell tumor	986 European ancestry cases, 4,946 European ancestry controls	1,064 European ancestry cases, 10,082 European ancestry controls	12p13.1	ATF7IP	ATF7IP			55729			rs2900333-C	3_prime_UTR_variant	0	0.62	1e-13		1.32	[1.20-1.46]	Illumina [307291]	N
97	rs10846167	12	15381210	rs12300553	2016-01-25	25811787	Huffman JE	2015-03-26	PLoS One	www.ncbi.nlm.nih.gov/pubmed/25811787	Modulation of Genetic Associations with Serum Urate Levels by Body-Mass-Index in Humans.	Urate levels in overweight individuals	up to 10,058 European ancestry male individuals, up to 7,189 European ancestry female individuals	NA	12p12.3	RERG	RERG - METTL8P1	85004	728996		6473	26464	rs12300553-G	intron_variant	1	0.67	7e-06	(women)	0.08	[0.045-0.115] kg/m2 decrease	Affymetrix, Illumina [at least 188473] (imputed)	N
97	rs10846167	12	15389637	rs12311304	2014-03-13	23942779	McGue M	2013-08-14	Behav Genet	www.ncbi.nlm.nih.gov/pubmed/23942779	A genome-wide association study of behavioral disinhibition.	Behavioural disinhibition (generation interaction)	3,852 European ancestry parents, 3,336 European ancestry offspring	NA	12p12.3	NR	RERG - METTL8P1	85004	728996		14900	18037	rs12311304-G	intron_variant	1	0.328	4e-06	(Alcohol dependence)			Illumina [527829]	N
98	rs10875914	12	49389320	rs1054442	2017-03-10	27329760	Hou L	2016-06-21	Hum Mol Genet	www.ncbi.nlm.nih.gov/pubmed/27329760	Genome-wide association study of 40,000 individuals identifies two novel loci associated with bipolar disorder.	Bipolar disorder	7,647 European ancestry cases, 27,303 European ancestry controls	2,137 European ancestry cases, 3,168 European ancestry controls	12q13.12	DDN	DDN			23109			rs1054442-A	3_prime_UTR_variant	0	0.62	1e-08		1.13	[1.09-1.17]	Affymetrix, Illumina [9692718] (imputed)	N
98	rs10875914	12	49416944	rs10875912	2016-06-08	26030696	Cho MH	2015-06-01	Am J Respir Crit Care Med	www.ncbi.nlm.nih.gov/pubmed/26030696	A Genome-wide Association Study of Emphysema and Airway Quantitative Imaging Phenotypes.	Percentage gas trapping	3,243 European ancestry chronic obstructive pulmonary disease cases, 901 African American chronic obstructive pulmonary disease cases, 3,062 European ancestry controls, 2,132 African American controls	NA	12q13.12	MLL2	KMT2D			8085			rs10875912-T	intron_variant	0	NR	8e-08	(Cases)	0.09	[0.057-0.123] unit decrease	Illumina [6900000] (imputed)	N
98	rs10875914	12	49422094	rs10875914	2017-06-04	28115744	Ikeda M	2017-01-24	Mol Psychiatry	www.ncbi.nlm.nih.gov/pubmed/28115744	A genome-wide association study identifies two novel susceptibility loci and trans population polygenicity associated with bipolar disorder.	Bipolar disorder	2,964 Japanese ancestry case, 61,887 Japanese ancestry controls, 7,481 European ancestry cases, 9,250 European ancestry controls	NA	12q13.12	DDN, LOC100652964, MLL2, RHEBL1	KMT2D			8085			rs10875914-G	intron_variant	0	NR	6e-08		1.11	[1.07-1.15]	Illumina [at least 6195093] (imputed)	N
98	rs10875914	12	49466994	rs10459221	2017-05-11	28072414	Charney AW	2017-01-10	Transl Psychiatry	www.ncbi.nlm.nih.gov/pubmed/28072414	Evidence for genetic heterogeneity between clinical subtypes of bipolar disorder.	Bipolar disorder	13,903 European ancestry cases, 19,279 European ancestry controls.	NA	12q13.12	NR	RHEBL1 - DHH	121268	50846		2529	13445	rs10459221-?	upstream_gene_variant	1	NR	2e-08		1.1		Affymetrix, Illumina [8837380] (imputed)	N
100	rs1702877	12	56390636	rs705702	2012-10-09	22885925	Shi Y	2012-08-12	Nat Genet	www.ncbi.nlm.nih.gov/pubmed/22885925	Genome-wide association study identifies eight new risk loci for polycystic ovary syndrome.	Polycystic ovary syndrome	2,254 Han Chinese ancestry cases, 3,001 Han Chinese ancestry controls	8,226 Han Chinese ancestry cases, 7,578 Han Chinese ancestry controls	12q13.2	RAB5B, SUOX	SUOX			6821			rs705702-G	upstream_gene_variant	0	0.245	9e-26		1.27	[NR]	Affymetrix [NR] (imputed)	N
100	rs1702877	12	56394954	rs773125	2014-08-05	24390342	Okada Y	2013-12-25	Nature	www.ncbi.nlm.nih.gov/pubmed/24390342	Genetics of rheumatoid arthritis contributes to biology and drug discovery.	Rheumatoid arthritis	up to 14,361 European ancestry cases, up to 42,923 European ancestry controls, up to 4,873 East Asian ancestry cases, up to 17,642 East Asian ancestry controls	up to 3,775 European ancestry cases, up to 5,801 European ancestry controls, up to 6,871 East Asian ancestry cases, up to 6,392 East Asian ancestry controls	12q13.2	CDK2	SUOX			6821			rs773125-A	intron_variant	0	0.6	2e-08	(EA)	1.09	[1.06-1.12]	Affymetrix, Illumina [up to 9739303] (imputed)	N
100	rs1702877	12	56394954	rs773125	2014-08-05	24390342	Okada Y	2013-12-25	Nature	www.ncbi.nlm.nih.gov/pubmed/24390342	Genetics of rheumatoid arthritis contributes to biology and drug discovery.	Rheumatoid arthritis	up to 14,361 European ancestry cases, up to 42,923 European ancestry controls, up to 4,873 East Asian ancestry cases, up to 17,642 East Asian ancestry controls	up to 3,775 European ancestry cases, up to 5,801 European ancestry controls, up to 6,871 East Asian ancestry cases, up to 6,392 East Asian ancestry controls	12q13.2	CDK2	SUOX			6821			rs773125-A	intron_variant	0	0.65	1e-10		1.09	[1.06-1.12]	Affymetrix, Illumina [up to 9739303] (imputed)	N
100	rs1702877	12	56396768	rs1689510	2016-08-31	26301688	Li YR	2015-08-24	Nat Med	www.ncbi.nlm.nih.gov/pubmed/26301688	Meta-analysis of shared genetic architecture across ten pediatric autoimmune diseases.	Pediatric autoimmune diseases	97 European ancestry thyroiditis cases, 107 European ancestry ankylosing spondylitis cases, 100 European ancestry psoriasis cases, 173 European ancestry celiac disease cases, 254 European ancestry systemic lupus erythematosus cases, 308 European ancestry common variable inmunodeficiency cases, 865 European ancestry ulcerative colitis cases, 1,086 European ancestry Type 1 diabetes cases, 1,123 Eur…	NA	12q13.2	SUOX	SUOX			6821			rs1689510-C	non_coding_transcript_exon_variant	0	0.31	4e-09				Illumina [7347414] (imputed)	N
100	rs1702877	12	56401085	rs10876864	2012-11-04	22951725	Tang XF	2012-09-06	J Invest Dermatol	www.ncbi.nlm.nih.gov/pubmed/22951725	Association analyses identify three susceptibility Loci for vitiligo in the Chinese Han population.	Vitiligo	1,117 Han Chinese ancestry cases, 1,701 Han Chinese ancestry controls	5,740 Han Chinese ancestry cases, 10,324 Han Chinese ancestry controls	12q13.2	PMEL, DGKA, CDK2, RAB5B, ZNFN1A4, PA2G4, SUOX, RPS26, ERBB3	SUOX - IKZF4	6821	64375		1776	346	rs10876864-G	upstream_gene_variant	1	0.24	8e-12		1.18	[1.13-1.24]	Illumina [493909]	N
100	rs1702877	12	56412487	rs1701704	2008-06-16	18198356	Hakonarson H	2008-01-15	Diabetes	www.ncbi.nlm.nih.gov/pubmed/18198356	A novel susceptibility locus for type 1 diabetes on Chr12q13 identified by a genome-wide association study.	Type 1 diabetes	467 European ancestry trios, 561 European ancestry cases, 1,143 European ancestry controls	946 European ancestry cases and 1,098 European ancestry controls from 549 families, 364 European ancestry trios	12q13.2	CDK2, RAB5B, SUOX, IKZF4, ERBB3	IKZF4, LOC105369781			64375, 105369781			rs1701704-C	intron_variant	0	0.35	9e-10		1.25	[1.12-1.40]	Illumina [543071]	N
100	rs1702877	12	56412487	rs1701704	2010-08-12	20596022	Petukhova L	2010-07-01	Nature	www.ncbi.nlm.nih.gov/pubmed/20596022	Genome-wide association study in alopecia areata implicates both innate and adaptive immunity.	Alopecia areata	Up to 1,054 European ancestry cases, 3,278 European ancestry controls	NA	12q13.2	IKZF4	IKZF4, LOC105369781			64375, 105369781			rs1701704-C	intron_variant	0	0.33	3e-08		1.34	[1.21-1.48]	Illumina [463301]	N
100	rs1702877	12	56412487	rs1701704	2011-08-27	21804548	Hirota T	2011-07-31	Nat Genet	www.ncbi.nlm.nih.gov/pubmed/21804548	Genome-wide association study identifies three new susceptibility loci for adult asthma in the Japanese population.	Asthma	1,532 Japanese ancestry cases, 3,304 Japanese ancestry controls	5,639 Japanese ancestry cases, 24,608 Japanese ancestry controls	12q13.2	IKZF4	IKZF4, LOC105369781			64375, 105369781			rs1701704-G	intron_variant	0	0.18	2e-13		1.19	[1.14-1.25]	Illumina [458847]	N
100	rs1702877	12	56412487	rs1701704	2011-09-21	21829393	Plagnol V	2011-08-04	PLoS Genet	www.ncbi.nlm.nih.gov/pubmed/21829393	Genome-wide association analysis of autoantibody positivity in type 1 diabetes cases.	Type 1 diabetes	8,506 European ancestry cases, up to 10,596 European ancestry controls	NA	12q13.2	IKZF4	IKZF4, LOC105369781			64375, 105369781			rs1701704-T	intron_variant	0	NR	5e-18		1.25	[NR]	Affymetrix, Illumina [NR]	N
100	rs1702877	12	56416928	rs2456973	2012-07-11	22561518	Jin Y	2012-05-06	Nat Genet	www.ncbi.nlm.nih.gov/pubmed/22561518	Genome-wide association analyses identify 13 new susceptibility loci for generalized vitiligo.	Vitiligo	418 European ancestry cases, 2,810 European ancestry controls	1,377 European ancestry cases, 1,284 European ancestry controls	12q13.2	IKZF4	LOC105369780, LOC105369781, IKZF4			105369780, 105369781, 64375			rs2456973-C	intron_variant	0	0.35	3e-14		1.29	[NR]	Illumina [495821]	N
100	rs1702877	12	56416928	rs2456973	2017-02-24	27225129	Okbay A	2016-05-26	Nature	www.ncbi.nlm.nih.gov/pubmed/27225129	Genome-wide association study identifies 74 loci associated with educational attainment.	Educational attainment (years of education)	405,072 European ancestry individuals	NA	12q13.2	NR	LOC105369780, LOC105369781, IKZF4			105369780, 105369781, 64375			rs2456973-A	intron_variant	0	0.6663	6e-16		0.0190684	NR unit decrease	Affymetrix, Illumina, Perlegen [~ 9300000] (imputed)	N
100	rs1702877	12	56416928	rs2456973	2017-02-25	27225129	Okbay A	2016-05-26	Nature	www.ncbi.nlm.nih.gov/pubmed/27225129	Genome-wide association study identifies 74 loci associated with educational attainment.	Educational attainment (college completion)	280,007 European ancestry individuals	NA	12q13.2	NR	LOC105369780, LOC105369781, IKZF4			105369780, 105369781, 64375			rs2456973-?	intron_variant	0	0.3306	2e-09		1.03801	[NR]	Affymetrix, Illumina, Perlegen [~ 9300000] (imputed)	N
100	rs1702877	12	56435412	rs705704	2017-06-13	28232668	Yu Y	2017-02-24	Nat Commun	www.ncbi.nlm.nih.gov/pubmed/28232668	Genome-wide analyses of non-syndromic cleft lip with palate identify 14 novel loci and genetic heterogeneity.	Nonsyndromic cleft lip with cleft palate	2,033 Han Chinese ancestry cases, 4,051 Han Chinese ancestry controls	1,346 Han Chinese ancestry cases, 4,542 Han Chinese ancestry controls	12q13.2	RPS26	LOC105369780			105369780			rs705704-A	non_coding_transcript_exon_variant	0	0.23	1e-09		1.22		Illumina [803202]	N
100	rs1702877	12	56435929	rs1131017	2015-12-18	25574825	Baurecht H	2015-01-08	Am J Hum Genet	www.ncbi.nlm.nih.gov/pubmed/25574825	Genome-wide Comparative Analysis of Atopic Dermatitis and Psoriasis Gives Insight into Opposing Genetic Mechanisms.	Inflammatory skin disease	2,079 European ancestry atopic dermatitis cases, 4,212 European ancestry psoriasis cases, 11,899 European ancestry controls	NA	12q13.2	RPS26	RPS26			6231			rs1131017-?	5_prime_UTR_variant	0	NR	4e-08	(Psoriasis)			Affymetrix, Illumina [~ 5200000]	N
100	rs1702877	12	56469185	rs4622308	2017-07-19	28494655	Duncan L	2017-05-12	Am J Psychiatry	www.ncbi.nlm.nih.gov/pubmed/28494655	Significant Locus and Metabolic Genetic Correlations Revealed in Genome-Wide Association Study of Anorexia Nervosa.	Anorexia nervosa	3,495 European ancestry cases, 10,982 European ancestry controls	NA	12q13.2	IKZF4, RPS26, ERBB3, PA2G4, RPL41, ZC3H10, ESYT1, SUOX, RAB5B, CDK2, PMEL, DGKA	RPS26 - ERBB3	6231	2065		31178	4624	rs4622308-T	upstream_gene_variant	1	0.44	4e-09		1.2	[1.14-1.26]	Illumina [10641224] (imputed)	N
100	rs1702877	12	56470625	rs11171739	2008-06-16	17554300	WTCCC	2007-06-07	Nature	www.ncbi.nlm.nih.gov/pubmed/17554300	Genome-wide association study of 14,000 cases of seven common diseases and 3,000 shared controls.	Type 1 diabetes	1,963 European ancestry cases, 2,938 European ancestry controls	(see Todd 2007)	12q13.2	ERBB3	RPS26 - ERBB3	6231	2065		32618	3184	rs11171739-C	upstream_gene_variant	1	0.42	1e-11		1.34	[1.17-1.54]	Affymetrix [469557]	N
100	rs1702877	12	56480583	rs877636	2015-11-08	25644384	Davies G	2015-02-03	Mol Psychiatry	www.ncbi.nlm.nih.gov/pubmed/25644384	Genetic contributions to variation in general cognitive function: a meta-analysis of genome-wide association studies in the CHARGE consortium (N=53â€‰949).	Cognitive function	51,719 European ancestry individuals 1,473 Erasmus Rupchen (founder/genetic isolate) individuals, 327 Korculan (founder/genetic isolate) individuals, 430 Orcadian (founder/genetic isolate) individuals	NA	12q13.2	SUOX, ERBB3, RAB5B, IKZF4, RPS26	ERBB3			2065			rs877636-?	intron_variant	0	NR	3e-07		0.0313	[0.019-0.043] unit decrease	Affymetrix, Illumina [2478500] (imputed)	N
100	rs1702877	12	56482180	rs2292239	2008-06-16	17554260	Todd JA	2007-06-06	Nat Genet	www.ncbi.nlm.nih.gov/pubmed/17554260	Robust associations of four new chromosome regions from genome-wide analyses of type 1 diabetes.	Type 1 diabetes	2,000 European ancestry cases, 3,000 European ancestry controls	2,997 European ancestry trios, 4,000 European ancestry cases, 5,000 European ancestry controls	12q13.2	ERBB3	ERBB3			2065			rs2292239-A	intron_variant	0	0.34	2e-20		1.28	[1.21-1.35]	Affymetrix [NR]	N
100	rs1702877	12	56482180	rs2292239	2008-11-26	18978792	Cooper JD	2008-11-02	Nat Genet	www.ncbi.nlm.nih.gov/pubmed/18978792	Meta-analysis of genome-wide association study data identifies additional type 1 diabetes risk loci.	Type 1 diabetes	3,561 European ancestry cases, 4,646 European ancestry controls	6,225 European ancestry cases, 6,946 European ancestry controls, 3,064 European ancestry trios from 2,828 families	12q13.2	ERBB3	ERBB3			2065			rs2292239-A	intron_variant	0	NR	3e-16				Affymetrix [up to 335565]	N
100	rs1702877	12	56482180	rs2292239	2009-06-01	19430480	Barrett JC	2009-05-10	Nat Genet	www.ncbi.nlm.nih.gov/pubmed/19430480	Genome-wide association study and meta-analysis find that over 40 loci affect risk of type 1 diabetes.	Type 1 diabetes	7,514 cases, 9,045 controls	4,267 cases, 4,670 controls, 4,342 trios from 2,319 families	12q13.2	ERBB3	ERBB3			2065			rs2292239-?	intron_variant	0	NR	2e-25				Affymetrix, Illumina [841622] (imputed)	N
100	rs1702877	12	56482180	rs2292239	2011-09-21	21829393	Plagnol V	2011-08-04	PLoS Genet	www.ncbi.nlm.nih.gov/pubmed/21829393	Genome-wide association analysis of autoantibody positivity in type 1 diabetes cases.	Type 1 diabetes	8,506 European ancestry cases, up to 10,596 European ancestry controls	NA	12q13.2	ERBB3	ERBB3			2065			rs2292239-T	intron_variant	0	NR	3e-27		1.3	[NR]	Affymetrix, Illumina [NR]	N
109	rs2478295	13	106639856	rs2251499	2017-07-18	28530673	Sniekers S	2017-05-22	Nat Genet	www.ncbi.nlm.nih.gov/pubmed/28530673	Genome-wide association meta-analysis of 78,308 individuals identifies new loci and genes influencing human intelligence.	Intelligence	up to 58,799 European ancestry adults, up to 19,509 European ancestry children	NA	13q33.2	LINC00343, LINC00460	LINC00343 - RNA5SP38	144920	100873370		225711	167865	rs2251499-T	intergenic_variant	1	0.2567	3e-10		6.313	z score increase	Affymetrix, Illumina [12104294] (imputed)	N
109	rs2478295	13	106639856	rs2251499	2017-07-18	28530673	Sniekers S	2017-05-22	Nat Genet	www.ncbi.nlm.nih.gov/pubmed/28530673	Genome-wide association meta-analysis of 78,308 individuals identifies new loci and genes influencing human intelligence.	Intelligence	up to 58,799 European ancestry adults, up to 19,509 European ancestry children	NA	13q33.2	LINC00343, LINC00460	LINC00343 - RNA5SP38	144920	100873370		225711	167865	rs2251499-T	intergenic_variant	1	0.2567	4e-09	(Adults)	5.866	z score increase	Affymetrix, Illumina [12104294] (imputed)	N
110	rs2333604	14	30088138	rs12431702	2013-06-14	23382691	Lauc G	2013-01-31	PLoS Genet	www.ncbi.nlm.nih.gov/pubmed/23382691	Loci associated with N-glycosylation of human immunoglobulin G show pleiotropy with autoimmune diseases and haematological cancers.	IgG glycosylation	2,247 European ancestry individuals	NA	14q12	NR	PRKD1			5587			rs12431702-C	intron_variant	0	0.380448	8e-06	(IGP17)	0.1459	[0.082-0.21] unit increase	Illumina [~ 2500000] (imputed)	N
111	rs10133551	14	33282470	rs2383378	2011-01-06	21079607	Wang K	2010-11-16	Mol Psychiatry	www.ncbi.nlm.nih.gov/pubmed/21079607	A genome-wide association study on common SNPs and rare CNVs in anorexia nervosa.	Anorexia nervosa	1,033 European ancestry cases, 3,733 European ancestry controls	NA	14q12	AKAP6	AKAP6			9472			rs2383378-?	intron_variant	0	0.41	6e-06				Illumina [~ 598000]	N
111	rs8016504	14	33302882	rs17522122	2015-11-08	25644384	Davies G	2015-02-03	Mol Psychiatry	www.ncbi.nlm.nih.gov/pubmed/25644384	Genetic contributions to variation in general cognitive function: a meta-analysis of genome-wide association studies in the CHARGE consortium (N=53â€‰949).	Cognitive function	51,719 European ancestry individuals 1,473 Erasmus Rupchen (founder/genetic isolate) individuals, 327 Korculan (founder/genetic isolate) individuals, 430 Orcadian (founder/genetic isolate) individuals	NA	14q12	AKAP6	AKAP6			9472			rs17522122-?	3_prime_UTR_variant	0	NR	3e-08		0.0311	[0.020-0.042] unit decrease	Affymetrix, Illumina [2478500] (imputed)	N
111	rs8016504	14	33302882	rs17522122	2016-01-27	25673413	Locke AE	2015-02-12	Nature	www.ncbi.nlm.nih.gov/pubmed/25673413	Genetic studies of body mass index yield new insights for obesity biology.	Body mass index	up to 104,666 European ancestry male individuals, up to 132,115 European ancestry female individuals, 370 African American male individuals, 517 African American female individuals, 512 Hispanic male individuals, 764 Hispanic female individuals	up to 48,274 European ancestry male individuals, up to 39,864 European ancestry female individuals, 2,441 African American or Afro-Caribbean male individuals, 6,314 African American or Afro-Caribbean female individuals, 919 Filipino male individuals, 828 Filipino female individuals, 205 Seychelles male individuals, 287 Seychelles female individuals, 2,964 South Asian ancestry male individuals, 65…	14q12	AKAP6	AKAP6			9472			rs17522122-T	3_prime_UTR_variant	0	0.471	3e-06		0.015	[0.0084-0.0206] kg/m2 increase	Affymetrix, Illumina [2550021]	N
111	rs8016504	14	33302882	rs17522122	2016-01-27	25673413	Locke AE	2015-02-12	Nature	www.ncbi.nlm.nih.gov/pubmed/25673413	Genetic studies of body mass index yield new insights for obesity biology.	Body mass index	up to 104,666 European ancestry male individuals, up to 132,115 European ancestry female individuals, 370 African American male individuals, 517 African American female individuals, 512 Hispanic male individuals, 764 Hispanic female individuals	up to 48,274 European ancestry male individuals, up to 39,864 European ancestry female individuals, 2,441 African American or Afro-Caribbean male individuals, 6,314 African American or Afro-Caribbean female individuals, 919 Filipino male individuals, 828 Filipino female individuals, 205 Seychelles male individuals, 287 Seychelles female individuals, 2,964 South Asian ancestry male individuals, 65…	14q12	AKAP6	AKAP6			9472			rs17522122-T	3_prime_UTR_variant	0	0.476	3e-06	(EA)	0.015	[0.0087-0.0217] kg/m2 increase	Affymetrix, Illumina [2550021]	N
111	rs8016504	14	33302882	rs17522122	2016-01-27	25673413	Locke AE	2015-02-12	Nature	www.ncbi.nlm.nih.gov/pubmed/25673413	Genetic studies of body mass index yield new insights for obesity biology.	Body mass index	up to 104,666 European ancestry male individuals, up to 132,115 European ancestry female individuals, 370 African American male individuals, 517 African American female individuals, 512 Hispanic male individuals, 764 Hispanic female individuals	up to 48,274 European ancestry male individuals, up to 39,864 European ancestry female individuals, 2,441 African American or Afro-Caribbean male individuals, 6,314 African American or Afro-Caribbean female individuals, 919 Filipino male individuals, 828 Filipino female individuals, 205 Seychelles male individuals, 287 Seychelles female individuals, 2,964 South Asian ancestry male individuals, 65…	14q12	AKAP6	AKAP6			9472			rs17522122-T	3_prime_UTR_variant	0	0.478	6e-06	(EA, women)	0.019	[0.011-0.027] kg/m2 increase	Affymetrix, Illumina [2550021]	N
111	rs2239647	14	33303540	rs12883788	2016-07-23	26198764	Goes FS	2015-07-21	Am J Med Genet B Neuropsychiatr Genet	www.ncbi.nlm.nih.gov/pubmed/26198764	Genome-wide association study of schizophrenia in Ashkenazi Jews.	Schizophrenia	592 Ashkenazi Jewish ancestry cases, 505 Ashkenazi Jewish ancestry controls, 36,989 cases, 113,075 controls	NA	14q12	NR	AKAP6 - NPAS3	9472	64067		335	100451	rs12883788-T	3_prime_UTR_variant	1	NR	3e-07		1.06	[NR]	Illumina [7158791] (imputed)	N
118	rs12438326	15	51014716	rs12913259	2016-10-05	26561523	de Vries PS	2015-11-10	Hum Mol Genet	www.ncbi.nlm.nih.gov/pubmed/26561523	A meta-analysis of 120,246 individuals identifies 18 new loci for fibrinogen concentration.	Fibrinogen levels	120,246 European ancestry individuals	NA	15q21.2	SPPL2A	SPPL2A			84888			rs12913259-T	intron_variant	0	0.3	2e-12		0.0068	NR unit decrease	Affymetrix, Illumina [~ 10700000] (imputed)	N
118	rs12438326	15	51015692	rs11630054	2017-06-01	28107422	de Vries PS	2017-01-20	PLoS One	www.ncbi.nlm.nih.gov/pubmed/28107422	Comparison of HapMap and 1000 Genomes Reference Panels in a Large-Scale Genome-Wide Association Study.	Fibrinogen levels	91,953 European ancestry individuals (imputed to 1000 Genomes)		15q21.2	SPPL2A	SPPL2A			84888			rs11630054-?	intron_variant	0	NR	3e-10		0.0067	unit increase	Affymetrix, Illumina [10883314] (imputed)	N
118	rs12438326	15	51024287	rs12915052	2017-06-01	28107422	de Vries PS	2017-01-20	PLoS One	www.ncbi.nlm.nih.gov/pubmed/28107422	Comparison of HapMap and 1000 Genomes Reference Panels in a Large-Scale Genome-Wide Association Study.	Fibrinogen levels	91,953 European ancestry individuals (imputed to HapMap)		15q21.2	SPPL2A	SPPL2A			84888			rs12915052-?	intron_variant	0	NR	2e-10		0.0069	unit increase	Affymetrix, Illumina [2749429] (imputed)	N
118	rs12438326	15	51040798	rs8035452	2014-04-16	24162737	European Alzheimer's Disease Initiative (EADI)	2013-10-27	Nat Genet	www.ncbi.nlm.nih.gov/pubmed/24162737	Meta-analysis of 74,046 individuals identifies 11 new susceptibility loci for Alzheimer's disease.	Alzheimer's disease (late onset)	17,008 European ancestry cases, 37,154 European ancestry controls	8,572 European ancestry cases, 11,312 European ancestry controls	15q21.2	SPPL2A	SPPL2A			84888			rs8035452-T	intron_variant	0	0.661	3e-07		1.0753	[1.04-1.1]	Illumina [7055881] (imputed)	N
118	rs12438326	15	51048602	rs12915708	2014-03-14	23969696	Sabater-Lleal M	2013-08-22	Circulation	www.ncbi.nlm.nih.gov/pubmed/23969696	Multiethnic meta-analysis of genome-wide association studies in &gt;100 000 subjects identifies 23 fibrinogen-associated Loci but no strong evidence of a causal association between circulating fibrinogen and cardiovascular disease.	Fibrinogen	91,323 European ancestry individuals	8,423 African American individuals, 1,447 Hispanic individuals	15q21.2	SPPL2A	SPPL2A			84888			rs12915708-C	intron_variant	0	0.3	7e-10	(EA)	0.007	[0.005-0.009] unit decrease	Affymetrix, Illumina [2515567] (imputed)	N
119	rs3858954	15	82513121	rs28420834	2017-02-24	27225129	Okbay A	2016-05-26	Nature	www.ncbi.nlm.nih.gov/pubmed/27225129	Genome-wide association study identifies 74 loci associated with educational attainment.	Educational attainment (years of education)	405,072 European ancestry individuals	NA	15q25.2	NR	EFTUD1			79631			rs28420834-A	intron_variant	0	0.4536	3e-10		0.0142759	NR unit decrease	Affymetrix, Illumina, Perlegen [~ 9300000] (imputed)	N
119	rs3850610	15	83226925	rs17507216	2017-05-11	27992416	Lane JM	2016-12-19	Nat Genet	www.ncbi.nlm.nih.gov/pubmed/27992416	Genome-wide association analyses of sleep disturbance traits identify new loci and highlight shared genetics with neuropsychiatric and metabolic traits.	Excessive daytime sleepiness	111,648 European ancestry individuals	NA	15q25.2	CPEB1	CPEB1			64506			rs17507216-A	intron_variant	0	0.232	2e-07		0.026	[0.016-0.036] unit increase	Affymetrix [up to 73355677] (imputed)	N
122	rs7186834	16	7662489	rs11640647	2017-03-17	27089181	Okbay A	2016-04-18	Nat Genet	www.ncbi.nlm.nih.gov/pubmed/27089181	Genetic variants associated with subjective well-being, depressive symptoms, and neuroticism identified through genome-wide analyses.	Neuroticism	170,911 European ancestry individuals	NA	16p13.3	NR	RBFOX1			54715			rs11640647-T	intron_variant	0	0.602	8e-06		0.0162784	[0.0091-0.0234] unit increase	Affymetrix [up to 6544775] (imputed)	N
126	rs72793807	16	28333411	rs2650492	2016-01-27	25673413	Locke AE	2015-02-12	Nature	www.ncbi.nlm.nih.gov/pubmed/25673413	Genetic studies of body mass index yield new insights for obesity biology.	Body mass index	up to 104,666 European ancestry male individuals, up to 132,115 European ancestry female individuals, 370 African American male individuals, 517 African American female individuals, 512 Hispanic male individuals, 764 Hispanic female individuals	up to 48,274 European ancestry male individuals, up to 39,864 European ancestry female individuals, 2,441 African American or Afro-Caribbean male individuals, 6,314 African American or Afro-Caribbean female individuals, 919 Filipino male individuals, 828 Filipino female individuals, 205 Seychelles male individuals, 287 Seychelles female individuals, 2,964 South Asian ancestry male individuals, 65…	16p12.1	SBK1	SBK1			388228			rs2650492-A	3_prime_UTR_variant	0	0.303	2e-09	(EA)	0.021	[0.014-0.028] kg/m2 increase	Affymetrix, Illumina [2550021]	N
126	rs72793807	16	28333411	rs2650492	2016-01-27	25673413	Locke AE	2015-02-12	Nature	www.ncbi.nlm.nih.gov/pubmed/25673413	Genetic studies of body mass index yield new insights for obesity biology.	Body mass index	up to 104,666 European ancestry male individuals, up to 132,115 European ancestry female individuals, 370 African American male individuals, 517 African American female individuals, 512 Hispanic male individuals, 764 Hispanic female individuals	up to 48,274 European ancestry male individuals, up to 39,864 European ancestry female individuals, 2,441 African American or Afro-Caribbean male individuals, 6,314 African American or Afro-Caribbean female individuals, 919 Filipino male individuals, 828 Filipino female individuals, 205 Seychelles male individuals, 287 Seychelles female individuals, 2,964 South Asian ancestry male individuals, 65…	16p12.1	SBK1	SBK1			388228			rs2650492-A	3_prime_UTR_variant	0	0.303	5e-06	(EA, men)	0.021	[0.012-0.031] kg/m2 increase	Affymetrix, Illumina [2550021]	N
126	rs72793807	16	28333411	rs2650492	2016-01-27	25673413	Locke AE	2015-02-12	Nature	www.ncbi.nlm.nih.gov/pubmed/25673413	Genetic studies of body mass index yield new insights for obesity biology.	Body mass index	up to 104,666 European ancestry male individuals, up to 132,115 European ancestry female individuals, 370 African American male individuals, 517 African American female individuals, 512 Hispanic male individuals, 764 Hispanic female individuals	up to 48,274 European ancestry male individuals, up to 39,864 European ancestry female individuals, 2,441 African American or Afro-Caribbean male individuals, 6,314 African American or Afro-Caribbean female individuals, 919 Filipino male individuals, 828 Filipino female individuals, 205 Seychelles male individuals, 287 Seychelles female individuals, 2,964 South Asian ancestry male individuals, 65…	16p12.1	SBK1	SBK1			388228			rs2650492-A	3_prime_UTR_variant	0	0.303	5e-06	(EA, women)	0.02	[0.011-0.029] kg/m2 increase	Affymetrix, Illumina [2550021]	N
126	rs72793807	16	28333411	rs2650492	2016-01-27	25673413	Locke AE	2015-02-12	Nature	www.ncbi.nlm.nih.gov/pubmed/25673413	Genetic studies of body mass index yield new insights for obesity biology.	Body mass index	up to 104,666 European ancestry male individuals, up to 132,115 European ancestry female individuals, 370 African American male individuals, 517 African American female individuals, 512 Hispanic male individuals, 764 Hispanic female individuals	up to 48,274 European ancestry male individuals, up to 39,864 European ancestry female individuals, 2,441 African American or Afro-Caribbean male individuals, 6,314 African American or Afro-Caribbean female individuals, 919 Filipino male individuals, 828 Filipino female individuals, 205 Seychelles male individuals, 287 Seychelles female individuals, 2,964 South Asian ancestry male individuals, 65…	16p12.1	SBK1	SBK1			388228			rs2650492-A	3_prime_UTR_variant	0	0.3	1e-09		0.021	[0.014-0.027] kg/m2 increase	Affymetrix, Illumina [2550021]	N
126	rs72793807	16	28333411	rs2650492	2017-05-23	25673412	Shungin D	2015-02-12	Nature	www.ncbi.nlm.nih.gov/pubmed/25673412	New genetic loci link adipose and insulin biology to body fat distribution.	Waist circumference	up to 56,910 European ancestry men, up to 86,570 European ancestry women	up to 36,570 European ancestry men, 30,172 European ancestry women, 915 Filipino ancestry men, 735 Filipino ancestry women, 2,351 African American/Afro-Caribbean ancestry men, 6,258 African American/Afro-Caribbean ancestry women, 2,285 South Asian ancestry men, 506 South Asian ancestry women, 195 Seychellois ancestry men, 266 Seychellois ancestry women	16p12.1	SBK1	SBK1			388228			rs2650492-A	3_prime_UTR_variant	0	0.3034	2e-11	(EA)	0.0256	[0.018-0.033] unit increase	Affymetrix, Illumina, Perlegen [up to 2542447] (imputed)	N
126	rs72793807	16	28333411	rs2650492	2017-05-23	25673412	Shungin D	2015-02-12	Nature	www.ncbi.nlm.nih.gov/pubmed/25673412	New genetic loci link adipose and insulin biology to body fat distribution.	Waist circumference	up to 56,910 European ancestry men, up to 86,570 European ancestry women	up to 36,570 European ancestry men, 30,172 European ancestry women, 915 Filipino ancestry men, 735 Filipino ancestry women, 2,351 African American/Afro-Caribbean ancestry men, 6,258 African American/Afro-Caribbean ancestry women, 2,285 South Asian ancestry men, 506 South Asian ancestry women, 195 Seychellois ancestry men, 266 Seychellois ancestry women	16p12.1	SBK1	SBK1			388228			rs2650492-A	3_prime_UTR_variant	0	0.3034	2e-06	(EA, women)	0.0239	[0.014-0.034] unit increase	Affymetrix, Illumina, Perlegen [up to 2542447] (imputed)	N
126	rs72793807	16	28333411	rs2650492	2017-05-23	25673412	Shungin D	2015-02-12	Nature	www.ncbi.nlm.nih.gov/pubmed/25673412	New genetic loci link adipose and insulin biology to body fat distribution.	Waist circumference	up to 56,910 European ancestry men, up to 86,570 European ancestry women	up to 36,570 European ancestry men, 30,172 European ancestry women, 915 Filipino ancestry men, 735 Filipino ancestry women, 2,351 African American/Afro-Caribbean ancestry men, 6,258 African American/Afro-Caribbean ancestry women, 2,285 South Asian ancestry men, 506 South Asian ancestry women, 195 Seychellois ancestry men, 266 Seychellois ancestry women	16p12.1	SBK1	SBK1			388228			rs2650492-A	3_prime_UTR_variant	0	0.3034	2e-07	(EA, men)	0.0279	[0.018-0.038] unit increase	Affymetrix, Illumina, Perlegen [up to 2542447] (imputed)	N
126	rs72793807	16	28333411	rs2650492	2017-08-10	28443625	Justice AE	2017-04-26	Nat Commun	www.ncbi.nlm.nih.gov/pubmed/28443625	Genome-wide meta-analysis of 241,258 adults accounting for smoking behaviour identifies novel loci for obesity traits.	BMI (adjusted for smoking behaviour)	98,173 European ancestry women, 64,373 European ancestry men, 5,829 European ancestry individuals, 10,500 African American/Afro-Caribbean ancestry women, 2,706 African American/Afro-Caribbean ancestry men, 1,030 Indian Asian ancestry women, 7,648 Indian Asian ancestry men, 1,793 Filipino ancestry women, 2,944 Hispanic/Latino ancestry women, 1,764 Hispanic/Latino ancestry men	21,496 European ancestry women, 24,385 European ancestry men, 118,364 European ancestry individuals, 2,326 African American/Afro-Caribbean ancestry women, 855 African American/Afro-Caribbean ancestry men	16p12.1	SBK1	SBK1			388228			rs2650492-A	3_prime_UTR_variant	0	0.2933	3e-08		0.0225	[0.015-0.03] kg/m2 increase	Affymetrix, Illumina, Perlegen [up to 2800000] (imputed)	N
126	rs72793807	16	28333411	rs2650492	2017-08-10	28443625	Justice AE	2017-04-26	Nat Commun	www.ncbi.nlm.nih.gov/pubmed/28443625	Genome-wide meta-analysis of 241,258 adults accounting for smoking behaviour identifies novel loci for obesity traits.	BMI in non-smokers	77,279 European ancestry women, 47,280 European ancestry men, 4,856 European ancestry individuals, 8,799 African American/Afro-Caribbean ancestry women, 1,803 African American/Afro-Caribbean ancestry men, 1,020 Indian Asian ancestry women, 6,691 Indian Asian ancestry men, 1,526 Filipino ancestry women, 2,469 Hispanic/Latino ancestry women, 1,318 Hispanic/Latino ancestry men	16,011 European ancestry women, 17,912 European ancestry men, 105,218 European ancestry individuals, 2,073 African American/Afro-Caribbean ancestry women, 647 African American/Afro-Caribbean ancestry men	16p12.1	SBK1	SBK1			388228			rs2650492-A	3_prime_UTR_variant	0	0.2933	3e-06		0.0215	[0.012-0.031] kg/m2 increase	Affymetrix, Illumina, Perlegen [up to 2800000] (imputed)	N
126	rs72793807	16	28333411	rs2650492	2017-08-10	28443625	Justice AE	2017-04-26	Nat Commun	www.ncbi.nlm.nih.gov/pubmed/28443625	Genome-wide meta-analysis of 241,258 adults accounting for smoking behaviour identifies novel loci for obesity traits.	Body mass index (joint analysis main effects and smoking interaction)	98,173 European ancestry women, 64,373 European ancestry men, 5,829 European ancestry individuals, 10,500 African American/Afro-Caribbean ancestry women, 2,706 African American/Afro-Caribbean ancestry men, 1,030 Indian Asian ancestry women, 7,648 Indian Asian ancestry men, 1,793 Filipino ancestry women, 2,944 Hispanic/Latino ancestry women, 1,764 Hispanic/Latino ancestry men	21,496 European ancestry women, 24,385 European ancestry men, 118,364 European ancestry individuals, 2,326 African American/Afro-Caribbean ancestry women, 855 African American/Afro-Caribbean ancestry men	16p12.1	SBK1	SBK1			388228			rs2650492-A	3_prime_UTR_variant	0	0.2933	4e-07				Affymetrix, Illumina, Perlegen [up to 2800000] (imputed)	N
126	rs2726032	16	28340945	rs12598357	2016-08-31	26301688	Li YR	2015-08-24	Nat Med	www.ncbi.nlm.nih.gov/pubmed/26301688	Meta-analysis of shared genetic architecture across ten pediatric autoimmune diseases.	Pediatric autoimmune diseases	97 European ancestry thyroiditis cases, 107 European ancestry ankylosing spondylitis cases, 100 European ancestry psoriasis cases, 173 European ancestry celiac disease cases, 254 European ancestry systemic lupus erythematosus cases, 308 European ancestry common variable inmunodeficiency cases, 865 European ancestry ulcerative colitis cases, 1,086 European ancestry Type 1 diabetes cases, 1,123 Eur…	NA	16p12.1	SBK1	SBK1 - LOC105369182	388228	105369182		5775	11700	rs12598357-G	intergenic_variant	1	0.39	4e-09				Illumina [7347414] (imputed)	N
126	rs62037363	16	28490517	rs151181	2012-10-19	21102463	Franke A	2010-11-21	Nat Genet	www.ncbi.nlm.nih.gov/pubmed/21102463	Genome-wide meta-analysis increases to 71 the number of confirmed Crohn's disease susceptibility loci.	Crohn's disease	6,333 European ancestry cases, 15,056 European ancestry controls	15,694 European ancestry cases, 14,026 European ancestry controls, 414 European ancestry trios	16p12.1	IL27, SH2B1, EIF3C, LAT, CD19	CLN3			1201			rs151181-G	intron_variant	0	0.386	2e-11		1.07	[1.03-1.12]	Affymetrix, Illumina [953241] (imputed)	N
126	rs750155	16	28517709	rs26528	2013-02-12	23128233	Jostins L	2012-11-01	Nature	www.ncbi.nlm.nih.gov/pubmed/23128233	Host-microbe interactions have shaped the genetic architecture of inflammatory bowel disease.	Inflammatory bowel disease	12,924 European ancestry cases, 21,442 European ancestry controls	25,683 European ancestry cases, 17,015 European ancestry controls	16p11.2	RABEP2, SULT1A1, SULT1A2, NUPR1, IL27, EIF3C	IL27			246778			rs26528-C	intron_variant	0	0.451	1e-21		1.099	[1.067-1.13]	Affymetrix, Illumina [1230000] (imputed)	N
126	rs750155	16	28517709	rs26528	2016-07-24	26192919	Liu JZ	2015-07-20	Nat Genet	www.ncbi.nlm.nih.gov/pubmed/26192919	Association analyses identify 38 susceptibility loci for inflammatory bowel disease and highlight shared genetic risk across populations.	Crohn's disease	5,956 European ancestry cases, 14,927 European ancestry controls	14,594 European ancestry cases, 26,715 European ancestry controls, 151 Iranian ancestry cases, 342 Iranian ancestry controls, 184 Indian ancestry cases, 990 Indian ancestry controls, 1,690 East Asian ancestry cases, 3,719 East Asian ancestry controls	16p11.2	NR	IL27			246778			rs26528-G	intron_variant	0	0.4576	1e-22	(EA)	1.12732	[1.1-1.15]	Affymetrix, Illumina [~ 9000000] (imputed)	N
126	rs750155	16	28517709	rs26528	2016-07-24	26192919	Liu JZ	2015-07-20	Nat Genet	www.ncbi.nlm.nih.gov/pubmed/26192919	Association analyses identify 38 susceptibility loci for inflammatory bowel disease and highlight shared genetic risk across populations.	Inflammatory bowel disease	12,882 European ancestry cases, 21,770 European ancestry controls	25,273 European ancestry cases, 26,715 European ancestry controls, 548 Iranian ancestry cases, 342 Iranian ancestry control, 1,423 Indian ancestry cases, 990 Indian ancestry controls, 2,824 East Asian ancestry cases, 3,719 East Asian ancestry controls	16p11.2	NR	IL27			246778			rs26528-G	intron_variant	0	0.4576	1e-21	(EA)	1.10178	[1.08-1.12]	Affymetrix, Illumina [~ 9000000] (imputed)	N
126	rs750155	16	28517709	rs26528	2016-07-24	26192919	Liu JZ	2015-07-20	Nat Genet	www.ncbi.nlm.nih.gov/pubmed/26192919	Association analyses identify 38 susceptibility loci for inflammatory bowel disease and highlight shared genetic risk across populations.	Ulcerative colitis	6,968 European ancestry cases, 20,464 European ancestry controls	10,679 European ancestry cases, 26,715 European ancestry controls, 397 Iranian ancestry cases, 342 Iranian ancestry controls, 1,239 Indian ancestry cases, 990 Indian ancestry controls, 1,134 East Asian ancestry cases, 3,719 East Asian ancestry controls	16p11.2	NR	IL27			246778			rs26528-G	intron_variant	0	0.4576	1e-06	(EA)	1.06364	[1.04-1.09]	Affymetrix, Illumina [~ 9000000] (imputed)	N
126	rs79046494	16	28528781	rs28449958	2017-06-02	28067908	de Lange KM	2017-01-09	Nat Genet	www.ncbi.nlm.nih.gov/pubmed/28067908	Genome-wide association study implicates immune activation of multiple integrin genes in inflammatory bowel disease.	Crohn's disease	12,194 European and unknown ancestry cases, 28,072 European and unknown ancestry controls	NA	16p11.2	IL27, NUPR1, TUFM, NPIPB6, EIF3CL, NPIPB7, CLN3, APOBR, SULT1A2, SULT1A1, NPIPB8, NPIPB9, SH2B1, ATP2A1, RABEP2, CD19, CCDC101, EIF3C, ATXN2L	IL27			246778			rs28449958-?	intergenic_variant	0		3e-10				Illumina [9560910] (imputed)	N
126	rs79046494	16	28528781	rs28449958	2017-06-02	28067908	de Lange KM	2017-01-09	Nat Genet	www.ncbi.nlm.nih.gov/pubmed/28067908	Genome-wide association study implicates immune activation of multiple integrin genes in inflammatory bowel disease.	Inflammatory bowel disease	25,042 European and unknown ancestry cases, 34,915 European and unknown ancestry controls	NA	16p11.2	IL27, NUPR1, TUFM, NPIPB6, EIF3CL, NPIPB7, CLN3, APOBR, SULT1A2, SULT1A1, NPIPB8, NPIPB9, SH2B1, ATP2A1, RABEP2, CD19, CCDC101, EIF3C, ATXN2L	IL27			246778			rs28449958-?	intergenic_variant	0		2e-12				Illumina [9725440] (imputed)	N
126	rs79046494	16	28539848	rs4788084	2009-06-01	19430480	Barrett JC	2009-05-10	Nat Genet	www.ncbi.nlm.nih.gov/pubmed/19430480	Genome-wide association study and meta-analysis find that over 40 loci affect risk of type 1 diabetes.	Type 1 diabetes	7,514 cases, 9,045 controls	4,267 cases, 4,670 controls, 4,342 trios from 2,319 families	16p11.2	IL27	IL27 - NUPR1	246778	26471		1797	8814	rs4788084-G	downstream_gene_variant	1	0.42	3e-13		1.09	[1.02-1.16]	Affymetrix, Illumina [841622] (imputed)	N
126	rs79046494	16	28539848	rs4788084	2011-09-21	21829393	Plagnol V	2011-08-04	PLoS Genet	www.ncbi.nlm.nih.gov/pubmed/21829393	Genome-wide association analysis of autoantibody positivity in type 1 diabetes cases.	Type 1 diabetes	8,506 European ancestry cases, up to 10,596 European ancestry controls	NA	16p11.2	IL27	IL27 - NUPR1	246778	26471		1797	8814	rs4788084-C	downstream_gene_variant	1	NR	1e-08		1.15	[NR]	Affymetrix, Illumina [NR]	N
126	rs79046494	16	28593347	rs17707300	2017-06-08	28166215	Hobbs BD	2017-02-06	Nat Genet	www.ncbi.nlm.nih.gov/pubmed/28166215	Genetic loci associated with chronic obstructive pulmonary disease overlap with loci for lung function and pulmonary fibrosis.	Chronic obstructive pulmonary disease	11,157 European ancestry cases, 36,699 European ancestry controls, 1,142 African American cases, 2,380 African American controls, 199 Korean ancestry cases, 6,741 Korean ancestry controls, 52 Hispanic cases, 548 Hispanic controls.	12,051 European ancestry cases, 11,111 European ancestry controls, 153 Korean ancestry cases, 205 Korean ancestry controls.	16p11.2	CCDC101, IL27	CCDC101			112869			rs17707300-C	intron_variant	0	0.37	7e-10		1.1	[1.06-1.13]	Affymetrix, Illumina [NR] (imputed)	N
126	rs62037363	16	28837515	rs8049439	2009-12-10	19915574	Imielinski M	2009-11-15	Nat Genet	www.ncbi.nlm.nih.gov/pubmed/19915574	Common variants at five new loci associated with early-onset inflammatory bowel disease.	Inflammatory bowel disease (early onset)	2,413 European ancestry cases, 6,158 European ancestry controls	1,013 European ancestry cases, 5,805 European ancestry controls	16p11.2	CCDC101, CLN3, SULT1A1, SULT1A2, NUPR1, IL27, EIF3C	ATXN2L			11273			rs8049439-G	intron_variant	0	0.37	2e-09		1.14	[1.00-1.30]	Illumina [~ 500000]	N
126	rs62037363	16	28837515	rs8049439	2013-11-29	23722424	Rietveld CA	2013-05-30	Science	www.ncbi.nlm.nih.gov/pubmed/23722424	GWAS of 126,559 individuals identifies genetic variants associated with educational attainment.	Educational attainment	up to 101,069 European ancestry individuals	25,490 European ancestry individuals	16p11.2	ATXN2L	ATXN2L			11273			rs8049439-T	intron_variant	0	0.581	1e-07	(Edu Years)	0.086	[NR] unit increase	Affymetrix, Illumina, Perlegen [up to 2309290] (imputed)	N
126	rs62037363	16	28837515	rs8049439	2015-05-08	25201988	Rietveld CA	2014-09-08	Proc Natl Acad Sci U S A	www.ncbi.nlm.nih.gov/pubmed/25201988	Common genetic variants associated with cognitive performance identified using the proxy-phenotype method.	Educational attainment	106,736 European ancestry individuals	NA	16p11.2	ATXN2L, TUFM, SH2B1, EIF3CL, NFATC2IP, NUPR1, SPNS1, LAT, SULT1A1, SULT1A2, CCDC101	ATXN2L			11273			rs8049439-T	intron_variant	0	0.595	1e-06		0.021	[NR] unit increase	Affymetrix, Illumina [NR] (imputed)	N
126	rs62037363	16	28837515	rs8049439	2017-02-24	27225129	Okbay A	2016-05-26	Nature	www.ncbi.nlm.nih.gov/pubmed/27225129	Genome-wide association study identifies 74 loci associated with educational attainment.	Educational attainment (years of education)	405,072 European ancestry individuals	NA	16p11.2	NR	ATXN2L			11273			rs8049439-T	intron_variant	0	0.5914	7e-11		0.0147527	NR unit increase	Affymetrix, Illumina, Perlegen [~ 9300000] (imputed)	N
126	rs62037363	16	28847246	rs12928404	2016-08-31	26301688	Li YR	2015-08-24	Nat Med	www.ncbi.nlm.nih.gov/pubmed/26301688	Meta-analysis of shared genetic architecture across ten pediatric autoimmune diseases.	Pediatric autoimmune diseases	97 European ancestry thyroiditis cases, 107 European ancestry ankylosing spondylitis cases, 100 European ancestry psoriasis cases, 173 European ancestry celiac disease cases, 254 European ancestry systemic lupus erythematosus cases, 308 European ancestry common variable inmunodeficiency cases, 865 European ancestry ulcerative colitis cases, 1,086 European ancestry Type 1 diabetes cases, 1,123 Eur…	NA	16p11.2	ATXN2L	ATXN2L			11273			rs12928404-C	splice_region_variant	0	0.38	6e-07				Illumina [7347414] (imputed)	N
126	rs62037363	16	28847246	rs12928404	2017-07-18	28530673	Sniekers S	2017-05-22	Nat Genet	www.ncbi.nlm.nih.gov/pubmed/28530673	Genome-wide association meta-analysis of 78,308 individuals identifies new loci and genes influencing human intelligence.	Intelligence	up to 58,799 European ancestry adults, up to 19,509 European ancestry children	NA	16p11.2	ATXN2L, NPIPB9, TUFM, SH2B1, ATP2A1	ATXN2L			11273			rs12928404-T	splice_region_variant	0	0.5885	1e-08		5.706	z score increase	Affymetrix, Illumina [12104294] (imputed)	N
126	rs62037363	16	28847246	rs12928404	2017-07-18	28530673	Sniekers S	2017-05-22	Nat Genet	www.ncbi.nlm.nih.gov/pubmed/28530673	Genome-wide association meta-analysis of 78,308 individuals identifies new loci and genes influencing human intelligence.	Intelligence	up to 58,799 European ancestry adults, up to 19,509 European ancestry children	NA	16p11.2	ATXN2L, NPIPB9, TUFM, SH2B1, ATP2A1	ATXN2L			11273			rs12928404-T	splice_region_variant	0	0.5885	4e-08	(Adults)	5.478	z score increase	Affymetrix, Illumina [12104294] (imputed)	N
126	rs62037363	16	28855727	rs4788099	2016-12-08	26833246	Lu Y	2016-02-01	Nat Commun	www.ncbi.nlm.nih.gov/pubmed/26833246	New loci for body fat percentage reveal link between adiposity and cardiometabolic disease risk.	Body fat percentage	Up to 31,457 European ancestry men, up to 35,030 European ancestry women, up to 8,259 Indian Asian ancestry men, up to 1,030 Indian Asian ancestry women, 973 Korean ancestry men, 1,360 Korean ancestry women, 154 African American men, 262 African American women	Up to 12,480 European ancestry men, up to 10,055 European ancestry women, 315 Jamaican ancestry men, 774 Jamaican ancestry women	16p11.2	TUFM, ATXN2L, SBK1, SULT1A2	TUFM			7284			rs4788099-G	intron_variant	0	0.38	1e-08		0.027	[0.017-0.037] body fat % increase	Affymetrix, Illumina, Perlegen [at least 1958375] (imputed)	N
126	rs62037363	16	28855727	rs4788099	2016-12-08	26833246	Lu Y	2016-02-01	Nat Commun	www.ncbi.nlm.nih.gov/pubmed/26833246	New loci for body fat percentage reveal link between adiposity and cardiometabolic disease risk.	Body fat percentage	Up to 31,457 European ancestry men, up to 35,030 European ancestry women, up to 8,259 Indian Asian ancestry men, up to 1,030 Indian Asian ancestry women, 973 Korean ancestry men, 1,360 Korean ancestry women, 154 African American men, 262 African American women	Up to 12,480 European ancestry men, up to 10,055 European ancestry women, 315 Jamaican ancestry men, 774 Jamaican ancestry women	16p11.2	TUFM, ATXN2L, SBK1, SULT1A2	TUFM			7284			rs4788099-G	intron_variant	0	0.38	7e-07	(men)	0.032	[0.019-0.045] body fat % increase	Affymetrix, Illumina, Perlegen [at least 1958375] (imputed)	N
126	rs62037363	16	28855727	rs4788099	2016-12-08	26833246	Lu Y	2016-02-01	Nat Commun	www.ncbi.nlm.nih.gov/pubmed/26833246	New loci for body fat percentage reveal link between adiposity and cardiometabolic disease risk.	Body fat percentage	Up to 31,457 European ancestry men, up to 35,030 European ancestry women, up to 8,259 Indian Asian ancestry men, up to 1,030 Indian Asian ancestry women, 973 Korean ancestry men, 1,360 Korean ancestry women, 154 African American men, 262 African American women	Up to 12,480 European ancestry men, up to 10,055 European ancestry women, 315 Jamaican ancestry men, 774 Jamaican ancestry women	16p11.2	TUFM, SH2B1	TUFM			7284			rs4788099-G	intron_variant	0	0.4	5e-06	(European men)	0.031	[0.017-0.045] body fat % increase	Affymetrix, Illumina, Perlegen [at least 1958375] (imputed)	N
126	rs62037363	16	28855727	rs4788099	2016-12-08	26833246	Lu Y	2016-02-01	Nat Commun	www.ncbi.nlm.nih.gov/pubmed/26833246	New loci for body fat percentage reveal link between adiposity and cardiometabolic disease risk.	Body fat percentage	Up to 31,457 European ancestry men, up to 35,030 European ancestry women, up to 8,259 Indian Asian ancestry men, up to 1,030 Indian Asian ancestry women, 973 Korean ancestry men, 1,360 Korean ancestry women, 154 African American men, 262 African American women	Up to 12,480 European ancestry men, up to 10,055 European ancestry women, 315 Jamaican ancestry men, 774 Jamaican ancestry women	16p11.2	TUFM, SH2B1	TUFM			7284			rs4788099-G	intron_variant	0	0.4	8e-08	(European)	0.026	[0.016-0.036] body fat % increase	Affymetrix, Illumina, Perlegen [at least 1958375] (imputed)	N
126	rs62037363	16	28857645	rs7187776	2017-05-23	25673412	Shungin D	2015-02-12	Nature	www.ncbi.nlm.nih.gov/pubmed/25673412	New genetic loci link adipose and insulin biology to body fat distribution.	Hip circumference adjusted for BMI	up to 56,910 European ancestry men, up to 86,570 European ancestry women	up to 36,570 European ancestry men, 30,172 European ancestry women, 915 Filipino ancestry men, 735 Filipino ancestry women, 2,351 African American/Afro-Caribbean ancestry men, 6,258 African American/Afro-Caribbean ancestry women, 2,285 South Asian ancestry men, 506 South Asian ancestry women, 195 Seychellois ancestry men, 266 Seychellois ancestry women	16p11.2	TUFM	TUFM			7284			rs7187776-A	5_prime_UTR_variant	0	0.5907	4e-08	(EA)	0.0197	[0.013-0.027] unit decrease	Affymetrix, Illumina, Perlegen [up to 2542447] (imputed)	N
126	rs62037363	16	28857645	rs7187776	2017-05-23	25673412	Shungin D	2015-02-12	Nature	www.ncbi.nlm.nih.gov/pubmed/25673412	New genetic loci link adipose and insulin biology to body fat distribution.	Hip circumference adjusted for BMI	up to 56,910 European ancestry men, up to 86,570 European ancestry women	up to 36,570 European ancestry men, 30,172 European ancestry women, 915 Filipino ancestry men, 735 Filipino ancestry women, 2,351 African American/Afro-Caribbean ancestry men, 6,258 African American/Afro-Caribbean ancestry women, 2,285 South Asian ancestry men, 506 South Asian ancestry women, 195 Seychellois ancestry men, 266 Seychellois ancestry women	16p11.2	TUFM	TUFM			7284			rs7187776-A	5_prime_UTR_variant	0	0.5907	7e-08	(EA, women)	0.0247	[0.016-0.034] unit decrease	Affymetrix, Illumina, Perlegen [up to 2542447] (imputed)	N
126	rs62037363	16	28865042	rs62037363	2016-07-24	26192919	Liu JZ	2015-07-20	Nat Genet	www.ncbi.nlm.nih.gov/pubmed/26192919	Association analyses identify 38 susceptibility loci for inflammatory bowel disease and highlight shared genetic risk across populations.	Inflammatory bowel disease	12,882 European ancestry cases, 21,770 European ancestry controls	25,273 European ancestry cases, 26,715 European ancestry controls, 548 Iranian ancestry cases, 342 Iranian ancestry control, 1,423 Indian ancestry cases, 990 Indian ancestry controls, 2,824 East Asian ancestry cases, 3,719 East Asian ancestry controls	16p11.2	NR	SH2B1, TUFM			25970, 7284			rs62037363-?	intron_variant	0	NR	6e-22	(EA)			Affymetrix, Illumina [~ 9000000] (imputed)	N
126	rs62037363	16	28883241	rs7498665	2009-01-12	19079261	Willer CJ	2008-12-14	Nat Genet	www.ncbi.nlm.nih.gov/pubmed/19079261	Six new loci associated with body mass index highlight a neuronal influence on body weight regulation.	Body mass index	32,387 European ancestry individuals	59,082 European ancestry individuals	16p11.2	SH2B1	SH2B1			25970			rs7498665-G	missense_variant	0	0.41	5e-11		0.15	[0.08-0.21] kg/m2 increase	Affymetrix, Illumina [2399588] (imputed)	N
126	rs62037363	16	28883241	rs7498665	2009-01-15	19079260	Thorleifsson G	2008-12-14	Nat Genet	www.ncbi.nlm.nih.gov/pubmed/19079260	Genome-wide association yields new sequence variants at seven loci that associate with measures of obesity.	Body mass index	72,598 European ancestry individuals, 1,160 African American individuals	Up to 11,036 European ancestry individuals, 32,615 individuals	16p11.2	ATP2A1, SH2B1	SH2B1			25970			rs7498665-G	missense_variant	0	0.44	3e-10		3.63	[2.49-4.77] % SD increase	Illumina [305846]	N
126	rs62037363	16	28883241	rs7498665	2009-01-15	19079260	Thorleifsson G	2008-12-14	Nat Genet	www.ncbi.nlm.nih.gov/pubmed/19079260	Genome-wide association yields new sequence variants at seven loci that associate with measures of obesity.	Weight	72,598 European ancestry individuals, 1,160 African American individuals	Up to 11,036 European ancestry individuals, 32,615 individuals	16p11.2	ATP2A1, SH2B1	SH2B1			25970			rs7498665-G	missense_variant	0	0.44	1e-09		3.69	[2.51-4.87] percentage SD increase	Illumina [305846]	N
126	rs62037363	16	28883241	rs7498665	2013-09-12	23563607	Berndt SI	2013-04-07	Nat Genet	www.ncbi.nlm.nih.gov/pubmed/23563607	Genome-wide meta-analysis identifies 11 new loci for anthropometric traits and provides insights into genetic architecture.	Obesity	93,015 European ancestry overweight individuals, 32,858 European ancestry class I obese individuals, 9,889 European ancestry class II obese individuals, 2,896 European ancestry class III obese individuals, up to 65,840 European ancestry controls	65,332 European ancestry overweight individuals, 22,373 European ancestry class I obese individuals, 5,476 European ancestry class II obese individuals, 1,162 European ancestry class III obese individuals, up to 39,294 European ancestry controls	16p11.2	SH2B1	SH2B1			25970			rs7498665-G	missense_variant	0	0.4	3e-13	(Obesity class I)	1.07	[NR]	Affymetrix, Illumina [~ 2800000] (imputed)	N
126	rs62037363	16	28883241	rs7498665	2013-09-12	23563607	Berndt SI	2013-04-07	Nat Genet	www.ncbi.nlm.nih.gov/pubmed/23563607	Genome-wide meta-analysis identifies 11 new loci for anthropometric traits and provides insights into genetic architecture.	Obesity	93,015 European ancestry overweight individuals, 32,858 European ancestry class I obese individuals, 9,889 European ancestry class II obese individuals, 2,896 European ancestry class III obese individuals, up to 65,840 European ancestry controls	65,332 European ancestry overweight individuals, 22,373 European ancestry class I obese individuals, 5,476 European ancestry class II obese individuals, 1,162 European ancestry class III obese individuals, up to 39,294 European ancestry controls	16p11.2	SH2B1	SH2B1			25970			rs7498665-G	missense_variant	0	0.4	5e-12	(Overweight)	1.05	[NR]	Affymetrix, Illumina [~ 2800000] (imputed)	N
126	rs62037363	16	28883241	rs7498665	2017-05-23	25673412	Shungin D	2015-02-12	Nature	www.ncbi.nlm.nih.gov/pubmed/25673412	New genetic loci link adipose and insulin biology to body fat distribution.	Waist circumference	up to 56,910 European ancestry men, up to 86,570 European ancestry women	up to 36,570 European ancestry men, 30,172 European ancestry women, 915 Filipino ancestry men, 735 Filipino ancestry women, 2,351 African American/Afro-Caribbean ancestry men, 6,258 African American/Afro-Caribbean ancestry women, 2,285 South Asian ancestry men, 506 South Asian ancestry women, 195 Seychellois ancestry men, 266 Seychellois ancestry women	16p11.2	SH2B1	SH2B1			25970			rs7498665-A	missense_variant	0	0.5971	1e-22	(EA)	0.0338	[0.027-0.041] unit decrease	Affymetrix, Illumina, Perlegen [up to 2542447] (imputed)	N
126	rs62037363	16	28883241	rs7498665	2017-05-23	25673412	Shungin D	2015-02-12	Nature	www.ncbi.nlm.nih.gov/pubmed/25673412	New genetic loci link adipose and insulin biology to body fat distribution.	Waist circumference	up to 56,910 European ancestry men, up to 86,570 European ancestry women	up to 36,570 European ancestry men, 30,172 European ancestry women, 915 Filipino ancestry men, 735 Filipino ancestry women, 2,351 African American/Afro-Caribbean ancestry men, 6,258 African American/Afro-Caribbean ancestry women, 2,285 South Asian ancestry men, 506 South Asian ancestry women, 195 Seychellois ancestry men, 266 Seychellois ancestry women	16p11.2	SH2B1	SH2B1			25970			rs7498665-A	missense_variant	0	0.5971	3e-12	(EA, women)	0.0313	[0.022-0.04] unit decrease	Affymetrix, Illumina, Perlegen [up to 2542447] (imputed)	N
126	rs62037363	16	28883241	rs7498665	2017-05-23	25673412	Shungin D	2015-02-12	Nature	www.ncbi.nlm.nih.gov/pubmed/25673412	New genetic loci link adipose and insulin biology to body fat distribution.	Waist circumference	up to 56,910 European ancestry men, up to 86,570 European ancestry women	up to 36,570 European ancestry men, 30,172 European ancestry women, 915 Filipino ancestry men, 735 Filipino ancestry women, 2,351 African American/Afro-Caribbean ancestry men, 6,258 African American/Afro-Caribbean ancestry women, 2,285 South Asian ancestry men, 506 South Asian ancestry women, 195 Seychellois ancestry men, 266 Seychellois ancestry women	16p11.2	SH2B1	SH2B1			25970			rs7498665-A	missense_variant	0	0.5971	5e-15	(EA, men)	0.0374	[0.028-0.047] unit decrease	Affymetrix, Illumina, Perlegen [up to 2542447] (imputed)	N
126	rs62037363	16	28885659	rs7359397	2010-11-17	20935630	Speliotes EK	2010-10-10	Nat Genet	www.ncbi.nlm.nih.gov/pubmed/20935630	Association analyses of 249,796 individuals reveal 18 new loci associated with body mass index.	Body mass index	Up to 123,865 European ancestry individuals	Up to 125,931 European ancestry individuals	16p11.2	APOB48R, SULT1A2, AC138894.2, ATXN2L, TUFM, SH2B1	SH2B1 - ATP2A1	25970	487		125	4150	rs7359397-T	upstream_gene_variant	1	0.4	2e-20		0.15	[0.11-0.19] kg/m2 increase	Affymetrix, Illumina, Perlegen [~ 2800000] (imputed)	N
126	rs62037363	16	28889486	rs3888190	2016-01-27	25673413	Locke AE	2015-02-12	Nature	www.ncbi.nlm.nih.gov/pubmed/25673413	Genetic studies of body mass index yield new insights for obesity biology.	Body mass index	up to 104,666 European ancestry male individuals, up to 132,115 European ancestry female individuals, 370 African American male individuals, 517 African American female individuals, 512 Hispanic male individuals, 764 Hispanic female individuals	up to 48,274 European ancestry male individuals, up to 39,864 European ancestry female individuals, 2,441 African American or Afro-Caribbean male individuals, 6,314 African American or Afro-Caribbean female individuals, 919 Filipino male individuals, 828 Filipino female individuals, 205 Seychelles male individuals, 287 Seychelles female individuals, 2,964 South Asian ancestry male individuals, 65…	16p11.2	ATP2A1	SH2B1 - ATP2A1	25970	487		3952	323	rs3888190-A	upstream_gene_variant	1	0.397	3e-25		0.031	[0.025-0.037] kg/m2 increase	Affymetrix, Illumina [2550021]	N
126	rs62037363	16	28889486	rs3888190	2016-01-27	25673413	Locke AE	2015-02-12	Nature	www.ncbi.nlm.nih.gov/pubmed/25673413	Genetic studies of body mass index yield new insights for obesity biology.	Body mass index	up to 104,666 European ancestry male individuals, up to 132,115 European ancestry female individuals, 370 African American male individuals, 517 African American female individuals, 512 Hispanic male individuals, 764 Hispanic female individuals	up to 48,274 European ancestry male individuals, up to 39,864 European ancestry female individuals, 2,441 African American or Afro-Caribbean male individuals, 6,314 African American or Afro-Caribbean female individuals, 919 Filipino male individuals, 828 Filipino female individuals, 205 Seychelles male individuals, 287 Seychelles female individuals, 2,964 South Asian ancestry male individuals, 65…	16p11.2	ATP2A1	SH2B1 - ATP2A1	25970	487		3952	323	rs3888190-A	upstream_gene_variant	1	0.402	1e-17	(EA, men)	0.035	[0.027-0.043] kg/m2 increase	Affymetrix, Illumina [2550021]	N
126	rs62037363	16	28889486	rs3888190	2016-01-27	25673413	Locke AE	2015-02-12	Nature	www.ncbi.nlm.nih.gov/pubmed/25673413	Genetic studies of body mass index yield new insights for obesity biology.	Body mass index	up to 104,666 European ancestry male individuals, up to 132,115 European ancestry female individuals, 370 African American male individuals, 517 African American female individuals, 512 Hispanic male individuals, 764 Hispanic female individuals	up to 48,274 European ancestry male individuals, up to 39,864 European ancestry female individuals, 2,441 African American or Afro-Caribbean male individuals, 6,314 African American or Afro-Caribbean female individuals, 919 Filipino male individuals, 828 Filipino female individuals, 205 Seychelles male individuals, 287 Seychelles female individuals, 2,964 South Asian ancestry male individuals, 65…	16p11.2	ATP2A1	SH2B1 - ATP2A1	25970	487		3952	323	rs3888190-A	upstream_gene_variant	1	0.403	3e-23	(EA)	0.031	[0.025-0.037] kg/m2 increase	Affymetrix, Illumina [2550021]	N
126	rs62037363	16	28889486	rs3888190	2016-01-27	25673413	Locke AE	2015-02-12	Nature	www.ncbi.nlm.nih.gov/pubmed/25673413	Genetic studies of body mass index yield new insights for obesity biology.	Body mass index	up to 104,666 European ancestry male individuals, up to 132,115 European ancestry female individuals, 370 African American male individuals, 517 African American female individuals, 512 Hispanic male individuals, 764 Hispanic female individuals	up to 48,274 European ancestry male individuals, up to 39,864 European ancestry female individuals, 2,441 African American or Afro-Caribbean male individuals, 6,314 African American or Afro-Caribbean female individuals, 919 Filipino male individuals, 828 Filipino female individuals, 205 Seychelles male individuals, 287 Seychelles female individuals, 2,964 South Asian ancestry male individuals, 65…	16p11.2	ATP2A1	SH2B1 - ATP2A1	25970	487		3952	323	rs3888190-A	upstream_gene_variant	1	0.403	4e-12	(EA, women)	0.028	[0.02-0.035] kg/m2 increase	Affymetrix, Illumina [2550021]	N
126	rs62037363	16	28889486	rs3888190	2017-05-23	25673412	Shungin D	2015-02-12	Nature	www.ncbi.nlm.nih.gov/pubmed/25673412	New genetic loci link adipose and insulin biology to body fat distribution.	Hip circumference	up to 56,910 European ancestry men, up to 86,570 European ancestry women	up to 36,570 European ancestry men, 30,172 European ancestry women, 915 Filipino ancestry men, 735 Filipino ancestry women, 2,351 African American/Afro-Caribbean ancestry men, 6,258 African American/Afro-Caribbean ancestry women, 2,285 South Asian ancestry men, 506 South Asian ancestry women, 195 Seychellois ancestry men, 266 Seychellois ancestry women	16p11.2	ATP2A1	SH2B1 - ATP2A1	25970	487		3952	323	rs3888190-A	upstream_gene_variant	1	0.4034	1e-11	(EA, men)	0.0336	[0.024-0.043] unit increase	Affymetrix, Illumina, Perlegen [up to 2542447] (imputed)	N
126	rs62037363	16	28889486	rs3888190	2017-05-23	25673412	Shungin D	2015-02-12	Nature	www.ncbi.nlm.nih.gov/pubmed/25673412	New genetic loci link adipose and insulin biology to body fat distribution.	Hip circumference	up to 56,910 European ancestry men, up to 86,570 European ancestry women	up to 36,570 European ancestry men, 30,172 European ancestry women, 915 Filipino ancestry men, 735 Filipino ancestry women, 2,351 African American/Afro-Caribbean ancestry men, 6,258 African American/Afro-Caribbean ancestry women, 2,285 South Asian ancestry men, 506 South Asian ancestry women, 195 Seychellois ancestry men, 266 Seychellois ancestry women	16p11.2	ATP2A1	SH2B1 - ATP2A1	25970	487		3952	323	rs3888190-A	upstream_gene_variant	1	0.4034	3e-14	(EA,women)	0.0355	[0.026-0.045] unit increase	Affymetrix, Illumina, Perlegen [up to 2542447] (imputed)	N
126	rs62037363	16	28889486	rs3888190	2017-05-23	25673412	Shungin D	2015-02-12	Nature	www.ncbi.nlm.nih.gov/pubmed/25673412	New genetic loci link adipose and insulin biology to body fat distribution.	Hip circumference	up to 56,910 European ancestry men, up to 86,570 European ancestry women	up to 36,570 European ancestry men, 30,172 European ancestry women, 915 Filipino ancestry men, 735 Filipino ancestry women, 2,351 African American/Afro-Caribbean ancestry men, 6,258 African American/Afro-Caribbean ancestry women, 2,285 South Asian ancestry men, 506 South Asian ancestry women, 195 Seychellois ancestry men, 266 Seychellois ancestry women	16p11.2	ATP2A1	SH2B1 - ATP2A1	25970	487		3952	323	rs3888190-A	upstream_gene_variant	1	0.4034	9e-22	(EA)	0.0345	[0.027-0.042] unit increase	Affymetrix, Illumina, Perlegen [up to 2542447] (imputed)	N
126	rs62037363	16	28889486	rs3888190	2017-08-10	28443625	Justice AE	2017-04-26	Nat Commun	www.ncbi.nlm.nih.gov/pubmed/28443625	Genome-wide meta-analysis of 241,258 adults accounting for smoking behaviour identifies novel loci for obesity traits.	BMI (adjusted for smoking behaviour)	98,173 European ancestry women, 64,373 European ancestry men, 5,829 European ancestry individuals, 10,500 African American/Afro-Caribbean ancestry women, 2,706 African American/Afro-Caribbean ancestry men, 1,030 Indian Asian ancestry women, 7,648 Indian Asian ancestry men, 1,793 Filipino ancestry women, 2,944 Hispanic/Latino ancestry women, 1,764 Hispanic/Latino ancestry men	21,496 European ancestry women, 24,385 European ancestry men, 118,364 European ancestry individuals, 2,326 African American/Afro-Caribbean ancestry women, 855 African American/Afro-Caribbean ancestry men	16p11.2	ATP2A1	SH2B1 - ATP2A1	25970	487		3952	323	rs3888190-A	upstream_gene_variant	1	0.3835	2e-18		0.029	[0.023-0.035] kg/m2 increase	Affymetrix, Illumina, Perlegen [up to 2800000] (imputed)	N
126	rs62037363	16	28889486	rs3888190	2017-08-10	28443625	Justice AE	2017-04-26	Nat Commun	www.ncbi.nlm.nih.gov/pubmed/28443625	Genome-wide meta-analysis of 241,258 adults accounting for smoking behaviour identifies novel loci for obesity traits.	BMI (adjusted for smoking behaviour)	98,173 European ancestry women, 64,373 European ancestry men, 5,829 European ancestry individuals, 10,500 African American/Afro-Caribbean ancestry women, 2,706 African American/Afro-Caribbean ancestry men, 1,030 Indian Asian ancestry women, 7,648 Indian Asian ancestry men, 1,793 Filipino ancestry women, 2,944 Hispanic/Latino ancestry women, 1,764 Hispanic/Latino ancestry men	21,496 European ancestry women, 24,385 European ancestry men, 118,364 European ancestry individuals, 2,326 African American/Afro-Caribbean ancestry women, 855 African American/Afro-Caribbean ancestry men	16p11.2	ATP2A1	SH2B1 - ATP2A1	25970	487		3952	323	rs3888190-A	upstream_gene_variant	1	0.3835	6e-10	(women)	0.0262	[0.018-0.034] kg/m2 increase	Affymetrix, Illumina, Perlegen [up to 2800000] (imputed)	N
126	rs62037363	16	28889486	rs3888190	2017-08-10	28443625	Justice AE	2017-04-26	Nat Commun	www.ncbi.nlm.nih.gov/pubmed/28443625	Genome-wide meta-analysis of 241,258 adults accounting for smoking behaviour identifies novel loci for obesity traits.	BMI (adjusted for smoking behaviour)	98,173 European ancestry women, 64,373 European ancestry men, 5,829 European ancestry individuals, 10,500 African American/Afro-Caribbean ancestry women, 2,706 African American/Afro-Caribbean ancestry men, 1,030 Indian Asian ancestry women, 7,648 Indian Asian ancestry men, 1,793 Filipino ancestry women, 2,944 Hispanic/Latino ancestry women, 1,764 Hispanic/Latino ancestry men	21,496 European ancestry women, 24,385 European ancestry men, 118,364 European ancestry individuals, 2,326 African American/Afro-Caribbean ancestry women, 855 African American/Afro-Caribbean ancestry men	16p11.2	ATP2A1	SH2B1 - ATP2A1	25970	487		3952	323	rs3888190-A	upstream_gene_variant	1	0.3835	6e-11	(men)	0.0319	[0.022-0.042] kg/m2 increase	Affymetrix, Illumina, Perlegen [up to 2800000] (imputed)	N
126	rs62037363	16	28889486	rs3888190	2017-08-10	28443625	Justice AE	2017-04-26	Nat Commun	www.ncbi.nlm.nih.gov/pubmed/28443625	Genome-wide meta-analysis of 241,258 adults accounting for smoking behaviour identifies novel loci for obesity traits.	BMI in non-smokers	77,279 European ancestry women, 47,280 European ancestry men, 4,856 European ancestry individuals, 8,799 African American/Afro-Caribbean ancestry women, 1,803 African American/Afro-Caribbean ancestry men, 1,020 Indian Asian ancestry women, 6,691 Indian Asian ancestry men, 1,526 Filipino ancestry women, 2,469 Hispanic/Latino ancestry women, 1,318 Hispanic/Latino ancestry men	16,011 European ancestry women, 17,912 European ancestry men, 105,218 European ancestry individuals, 2,073 African American/Afro-Caribbean ancestry women, 647 African American/Afro-Caribbean ancestry men	16p11.2	ATP2A1	SH2B1 - ATP2A1	25970	487		3952	323	rs3888190-A	upstream_gene_variant	1	0.3835	1e-10	(men)	0.0355	[0.025-0.046] kg/m2 increase	Affymetrix, Illumina, Perlegen [up to 2800000] (imputed)	N
126	rs62037363	16	28889486	rs3888190	2017-08-10	28443625	Justice AE	2017-04-26	Nat Commun	www.ncbi.nlm.nih.gov/pubmed/28443625	Genome-wide meta-analysis of 241,258 adults accounting for smoking behaviour identifies novel loci for obesity traits.	BMI in non-smokers	77,279 European ancestry women, 47,280 European ancestry men, 4,856 European ancestry individuals, 8,799 African American/Afro-Caribbean ancestry women, 1,803 African American/Afro-Caribbean ancestry men, 1,020 Indian Asian ancestry women, 6,691 Indian Asian ancestry men, 1,526 Filipino ancestry women, 2,469 Hispanic/Latino ancestry women, 1,318 Hispanic/Latino ancestry men	16,011 European ancestry women, 17,912 European ancestry men, 105,218 European ancestry individuals, 2,073 African American/Afro-Caribbean ancestry women, 647 African American/Afro-Caribbean ancestry men	16p11.2	ATP2A1	SH2B1 - ATP2A1	25970	487		3952	323	rs3888190-A	upstream_gene_variant	1	0.3835	2e-07	(women)	0.0247	[0.015-0.034] kg/m2 increase	Affymetrix, Illumina, Perlegen [up to 2800000] (imputed)	N
126	rs62037363	16	28889486	rs3888190	2017-08-10	28443625	Justice AE	2017-04-26	Nat Commun	www.ncbi.nlm.nih.gov/pubmed/28443625	Genome-wide meta-analysis of 241,258 adults accounting for smoking behaviour identifies novel loci for obesity traits.	BMI in non-smokers	77,279 European ancestry women, 47,280 European ancestry men, 4,856 European ancestry individuals, 8,799 African American/Afro-Caribbean ancestry women, 1,803 African American/Afro-Caribbean ancestry men, 1,020 Indian Asian ancestry women, 6,691 Indian Asian ancestry men, 1,526 Filipino ancestry women, 2,469 Hispanic/Latino ancestry women, 1,318 Hispanic/Latino ancestry men	16,011 European ancestry women, 17,912 European ancestry men, 105,218 European ancestry individuals, 2,073 African American/Afro-Caribbean ancestry women, 647 African American/Afro-Caribbean ancestry men	16p11.2	ATP2A1	SH2B1 - ATP2A1	25970	487		3952	323	rs3888190-A	upstream_gene_variant	1	0.3835	4e-15		0.0294	[0.022-0.037] kg/m2 increase	Affymetrix, Illumina, Perlegen [up to 2800000] (imputed)	N
126	rs62037363	16	28889486	rs3888190	2017-08-10	28443625	Justice AE	2017-04-26	Nat Commun	www.ncbi.nlm.nih.gov/pubmed/28443625	Genome-wide meta-analysis of 241,258 adults accounting for smoking behaviour identifies novel loci for obesity traits.	Body mass index (joint analysis main effects and smoking interaction)	98,173 European ancestry women, 64,373 European ancestry men, 5,829 European ancestry individuals, 10,500 African American/Afro-Caribbean ancestry women, 2,706 African American/Afro-Caribbean ancestry men, 1,030 Indian Asian ancestry women, 7,648 Indian Asian ancestry men, 1,793 Filipino ancestry women, 2,944 Hispanic/Latino ancestry women, 1,764 Hispanic/Latino ancestry men	21,496 European ancestry women, 24,385 European ancestry men, 118,364 European ancestry individuals, 2,326 African American/Afro-Caribbean ancestry women, 855 African American/Afro-Caribbean ancestry men	16p11.2	ATP2A1	SH2B1 - ATP2A1	25970	487		3952	323	rs3888190-A	upstream_gene_variant	1	0.3835	2e-11	(men)			Affymetrix, Illumina, Perlegen [up to 2800000] (imputed)	N
126	rs62037363	16	28889486	rs3888190	2017-08-10	28443625	Justice AE	2017-04-26	Nat Commun	www.ncbi.nlm.nih.gov/pubmed/28443625	Genome-wide meta-analysis of 241,258 adults accounting for smoking behaviour identifies novel loci for obesity traits.	Body mass index (joint analysis main effects and smoking interaction)	98,173 European ancestry women, 64,373 European ancestry men, 5,829 European ancestry individuals, 10,500 African American/Afro-Caribbean ancestry women, 2,706 African American/Afro-Caribbean ancestry men, 1,030 Indian Asian ancestry women, 7,648 Indian Asian ancestry men, 1,793 Filipino ancestry women, 2,944 Hispanic/Latino ancestry women, 1,764 Hispanic/Latino ancestry men	21,496 European ancestry women, 24,385 European ancestry men, 118,364 European ancestry individuals, 2,326 African American/Afro-Caribbean ancestry women, 855 African American/Afro-Caribbean ancestry men	16p11.2	ATP2A1	SH2B1 - ATP2A1	25970	487		3952	323	rs3888190-A	upstream_gene_variant	1	0.3835	3e-08	(women)			Affymetrix, Illumina, Perlegen [up to 2800000] (imputed)	N
126	rs62037363	16	28889486	rs3888190	2017-08-10	28443625	Justice AE	2017-04-26	Nat Commun	www.ncbi.nlm.nih.gov/pubmed/28443625	Genome-wide meta-analysis of 241,258 adults accounting for smoking behaviour identifies novel loci for obesity traits.	Body mass index (joint analysis main effects and smoking interaction)	98,173 European ancestry women, 64,373 European ancestry men, 5,829 European ancestry individuals, 10,500 African American/Afro-Caribbean ancestry women, 2,706 African American/Afro-Caribbean ancestry men, 1,030 Indian Asian ancestry women, 7,648 Indian Asian ancestry men, 1,793 Filipino ancestry women, 2,944 Hispanic/Latino ancestry women, 1,764 Hispanic/Latino ancestry men	21,496 European ancestry women, 24,385 European ancestry men, 118,364 European ancestry individuals, 2,326 African American/Afro-Caribbean ancestry women, 855 African American/Afro-Caribbean ancestry men	16p11.2	ATP2A1	SH2B1 - ATP2A1	25970	487		3952	323	rs3888190-A	upstream_gene_variant	1	0.3835	6e-18				Affymetrix, Illumina, Perlegen [up to 2800000] (imputed)	N
126	rs62037363	16	28921809	rs7184597	2013-09-12	23563607	Berndt SI	2013-04-07	Nat Genet	www.ncbi.nlm.nih.gov/pubmed/23563607	Genome-wide meta-analysis identifies 11 new loci for anthropometric traits and provides insights into genetic architecture.	Obesity	93,015 European ancestry overweight individuals, 32,858 European ancestry class I obese individuals, 9,889 European ancestry class II obese individuals, 2,896 European ancestry class III obese individuals, up to 65,840 European ancestry controls	65,332 European ancestry overweight individuals, 22,373 European ancestry class I obese individuals, 5,476 European ancestry class II obese individuals, 1,162 European ancestry class III obese individuals, up to 39,294 European ancestry controls	16p11.2	RABEP2, SH2B1	RABEP2			79874			rs7184597-T	non_coding_transcript_exon_variant	0	0.33	7e-09	(Obesity class II)	1.1	[NR]	Affymetrix, Illumina [~ 2800000] (imputed)	N
130	rs9921412	16	72012772	rs1122531	2017-06-26	28334899	Spracklen CN	2017-02-21	Hum Mol Genet	www.ncbi.nlm.nih.gov/pubmed/28334899	Association analyses of East Asian individuals and trans-ancestry analyses with European individuals reveal new loci associated with cholesterol and triglyceride levels.	Total cholesterol levels	22,814 East Asian ancestry individuals	57,490 East Asian ancestry individuals	16q22.2	PKD1L3	PKD1L3			342372			rs1122531-T	intron_variant	0	0.71	1e-13	(BMI unadjusted)	0.081	[0.059-0.103] unit increase	Affymetrix, Illumina [~ 2400000] (imputed)	N
130	rs9921412	16	72014782	rs7192750	2017-06-26	28334899	Spracklen CN	2017-02-21	Hum Mol Genet	www.ncbi.nlm.nih.gov/pubmed/28334899	Association analyses of East Asian individuals and trans-ancestry analyses with European individuals reveal new loci associated with cholesterol and triglyceride levels.	LDL cholesterol levels	22,526 East Asian ancestry individuals	37,842 East Asian ancestry individuals	16q22.2	PKD1L3	PKD1L3			342372			rs7192750-T	intron_variant	0	0.29	1e-14	(BMI unadjusted)	0.084	[0.062-0.106] unit decrease	Affymetrix, Illumina [~ 2400000] (imputed)	N
130	rs9921412	16	72014782	rs7192750	2017-06-26	28334899	Spracklen CN	2017-02-21	Hum Mol Genet	www.ncbi.nlm.nih.gov/pubmed/28334899	Association analyses of East Asian individuals and trans-ancestry analyses with European individuals reveal new loci associated with cholesterol and triglyceride levels.	Total cholesterol levels	32,576 East Asian ancestry individuals, 187,365 European ancestry individuals	10,855 Chinese ancestry individuals	16q22.2	PKD1L3	PKD1L3			342372			rs7192750-T	intron_variant	0	0.28	6e-13	(Asian initial, BMI unadjusted)	0.068	[0.05-0.086] unit decrease	Affymetrix, Illumina [up to 1900000] (imputed)	N
130	rs9921412	16	72015251	rs8051431	2017-06-26	28334899	Spracklen CN	2017-02-21	Hum Mol Genet	www.ncbi.nlm.nih.gov/pubmed/28334899	Association analyses of East Asian individuals and trans-ancestry analyses with European individuals reveal new loci associated with cholesterol and triglyceride levels.	LDL cholesterol levels	32,285 East Asian ancestry individuals, 173,082 European ancestry individuals	8,478 Chinese ancestry individuals	16q22.2	PKD1L3	PKD1L3			342372			rs8051431-C	intron_variant	0	0.71	4e-15	(Asian initial, BMI unadjusted)	0.075	[0.057-0.093] unit increase	Affymetrix, Illumina [~ 1900000] (imputed)	N
130	rs62056490	16	72025077	rs12927205	2016-10-07	26582766	Lu X	2015-11-18	Circ Cardiovasc Genet	www.ncbi.nlm.nih.gov/pubmed/26582766	Genetic Susceptibility to Lipid Levels and Lipid Change Over Time and Risk of Incident Hyperlipidemia in Chinese Populations.	Cholesterol, total	8,344 Han Chinese ancestry individuals	14,739 Han Chinese ancestry individuals	16q22.2	HPR	PKD1L3, RPL39P31			342372, 100271525			rs12927205-A	non_coding_transcript_exon_variant	0	0.74	7e-07		1.784	[1.07-2.49] unit increase	Affymetrix, Illumina [2573667] (imputed)	N
130	rs62056490	16	72025077	rs12927205	2016-10-07	26582766	Lu X	2015-11-18	Circ Cardiovasc Genet	www.ncbi.nlm.nih.gov/pubmed/26582766	Genetic Susceptibility to Lipid Levels and Lipid Change Over Time and Risk of Incident Hyperlipidemia in Chinese Populations.	LDL cholesterol	8,344 Han Chinese ancestry individuals	14,739 Han Chinese ancestry individuals	16q22.2	HPR	PKD1L3, RPL39P31			342372, 100271525			rs12927205-A	non_coding_transcript_exon_variant	0	0.74	8e-07		1.462	[0.86-2.07] unit increase	Affymetrix, Illumina [2573667] (imputed)	N
131	rs4925114	17	17715101	rs11868035	2011-07-20	21738487	Do CB	2011-06-23	PLoS Genet	www.ncbi.nlm.nih.gov/pubmed/21738487	Web-based genome-wide association study identifies two novel loci and a substantial genetic component for Parkinson's disease.	Parkinson's disease	3,426 European ancestry cases, 29,624 European ancestry controls	NA	17p11.2	SREBF1, RAI1	SREBF1			6720			rs11868035-G	splice_region_variant	0	0.69	6e-08		1.18	[1.11-1.25]	Illumina [522782]	N
131	rs4925114	17	17716531	rs12941356	2017-03-27	27798624	Eppinga RN	2016-10-31	Nat Genet	www.ncbi.nlm.nih.gov/pubmed/27798624	Identification of genomic loci associated with resting heart rate and shared genetic predictors with all-cause mortality.	Resting heart rate	127,919 European ancestry individuals, 2,478 Asian ancestry individuals, 1,734 Black individuals, 684 Mixed ancestry individuals, 1,436 individuals	130,795 European ancestry individuals	17p11.2	SREBF1, RAI	SREBF1			6720			rs12941356-G	3_prime_UTR_variant	0	0.42	5e-08		0.1809	[0.12-0.25] unit decrease	Affymetrix [19941912] (imputed)	N
133	rs242559	17	43513441	rs11012	2010-02-05	20070850	Edwards TL	2010-01-13	Ann Hum Genet	www.ncbi.nlm.nih.gov/pubmed/20070850	Genome-wide association study confirms SNPs in SNCA and the MAPT region as common risk factors for Parkinson disease.	Parkinson's disease	1,752 European ancestry cases, 1,745 European ancestry controls	NA	17q21.31	MAPT, PLEKHM1, IMP5	PLEKHM1			9842			rs11012-T	3_prime_UTR_variant	0	NR	6e-08		1.43	[1.27-1.61]	Illumina [495715] (imputed)	N
133	rs242559	17	43516402	rs17631303	2013-08-02	23544013	Couch FJ	2013-03-27	PLoS Genet	www.ncbi.nlm.nih.gov/pubmed/23544013	Genome-wide association study in BRCA1 mutation carriers identifies novel loci associated with breast and ovarian cancer risk.	Ovarian cancer in BRCA1 mutation carriers	683 European ancestry cases, 2,044 European ancestry controls	1,706 European ancestry cases, 10,258 European ancestry controls	17q21.31	intergenic	PLEKHM1			9842			rs17631303-G	intron_variant	0	0.19	1e-08		1.27	[1.17-1.38]	Illumina [2568349] (imputed)	N
133	rs242559	17	43516402	rs17631303	2013-08-02	23544013	Couch FJ	2013-03-27	PLoS Genet	www.ncbi.nlm.nih.gov/pubmed/23544013	Genome-wide association study in BRCA1 mutation carriers identifies novel loci associated with breast and ovarian cancer risk.	Ovarian cancer in BRCA1 mutation carriers	683 European ancestry cases, 2,044 European ancestry controls	1,706 European ancestry cases, 10,258 European ancestry controls	17q21.31	NR	PLEKHM1			9842			rs17631303-?	intron_variant	0	NR	1e-08				Illumina [2568349] (imputed)	N
133	rs242559	17	43567337	rs1879586	2017-08-03	28346442	Phelan CM	2017-03-27	Nat Genet	www.ncbi.nlm.nih.gov/pubmed/28346442	Identification of 12 new susceptibility loci for different histotypes of epithelial ovarian cancer.	Invasive epithelial ovarian cancer	22,406 European ancestry cases, 40,941 European ancestry controls	NA	17q21.31	NR	PLEKHM1			9842			rs1879586-G	intron_variant	0	0.181254	2e-13		1.1339	[1.09660984313914-1.1724605092959]	Illumina [11595112] (imputed)	N
133	rs242559	17	43567337	rs1879586	2017-08-03	28346442	Phelan CM	2017-03-27	Nat Genet	www.ncbi.nlm.nih.gov/pubmed/28346442	Identification of 12 new susceptibility loci for different histotypes of epithelial ovarian cancer.	Ovarian cancer in BRCA1 mutation carriers	2,933 European ancestry cases, 16,103 European ancestry controls	NA	17q21.31	NR	PLEKHM1			9842			rs1879586-G	intron_variant	0	0.181254	7e-06		1.18046	[1.0983093028467-1.26874471717965]	Illumina [11595112] (imputed)	N
133	rs242559	17	43567337	rs1879586	2017-08-04	28346442	Phelan CM	2017-03-27	Nat Genet	www.ncbi.nlm.nih.gov/pubmed/28346442	Identification of 12 new susceptibility loci for different histotypes of epithelial ovarian cancer.	Epithelial ovarian cancer	16,924 European ancestry cases,Â 68,502 European ancestry controls	NA	17q21.31	NR	PLEKHM1			9842			rs1879586-G	intron_variant	0	0.181254	2e-19		1.16114	[1.12396655984348-1.19953742102822]	Illumina [11595112] (imputed)	N
133	rs242559	17	43567337	rs1879586	2017-08-07	28346442	Phelan CM	2017-03-27	Nat Genet	www.ncbi.nlm.nih.gov/pubmed/28346442	Identification of 12 new susceptibility loci for different histotypes of epithelial ovarian cancer.	High-grade serous ovarian cancer	13,037 European ancestry cases,Â 40,941 European ancestry controls	NA	17q21.31	NR	PLEKHM1			9842			rs1879586-G	intron_variant	0	0.181254	3e-13		1.15856	[1.11378456264581-1.20513099189349]	Illumina [11595112] (imputed)	N
133	rs242559	17	43567337	rs1879586	2017-08-07	28346442	Phelan CM	2017-03-27	Nat Genet	www.ncbi.nlm.nih.gov/pubmed/28346442	Identification of 12 new susceptibility loci for different histotypes of epithelial ovarian cancer.	Serous invasive ovarian cancer	14,049 European ancestry cases,Â 40,941 European ancestry controls	NA	17q21.31	NR	PLEKHM1			9842			rs1879586-G	intron_variant	0	0.181254	3e-12		1.14721	[1.10406141518038-1.19204274035159]	Illumina [11595112] (imputed)	N
133	rs242559	17	43705601	rs365825	2017-05-11	27182965	Pickrell JK	2016-05-16	Nat Genet	www.ncbi.nlm.nih.gov/pubmed/27182965	Detection and interpretation of shared genetic influences on 42 human traits.	Parkinson's disease	9,619 European ancestry cases, 324,522 European ancestry controls	NA	17q21.31	CRHR1, LRRC37A3	MGC57346-CRHR1, MGC57346			104909134, 401884			rs365825-?	intron_variant	0	NR	4e-32		1.27226	[1.22-1.33]	Illumina [12438219] (imputed)	N
133	rs242559	17	43714850	rs2942168	2015-04-20	21292315	Nalls MA	2011-02-01	Lancet	www.ncbi.nlm.nih.gov/pubmed/21292315	Imputation of sequence variants for identification of genetic risks for Parkinson's disease: a meta-analysis of genome-wide association studies.	Parkinson's disease	5,333 European ancestry cases, 12,019 European ancestry controls	7,053 cases, 9,007 controls	17q21.31	MAPT	MGC57346, MGC57346-CRHR1			401884, 104909134			rs2942168-G	non_coding_transcript_exon_variant	0	0.78	1e-28		1.27	[1.23-1.31]	Illumina [7689524] (imputed)	N
133	rs242559	17	43719143	rs393152	2009-12-10	19915575	Simon-Sanchez J	2009-11-15	Nat Genet	www.ncbi.nlm.nih.gov/pubmed/19915575	Genome-wide association study reveals genetic risk underlying Parkinson's disease.	Parkinson's disease	1,713 European ancestry cases, 3,978 European ancestry controls	3,361 European ancestry cases, 4,573 European ancestry controls	17q21.31	MAPT, C17orf69, KIAA1267, LOC644246	MGC57346-CRHR1, CRHR1-IT1			104909134, 147081			rs393152-A	non_coding_transcript_exon_variant	0	0.82	2e-16		1.3	[NR]	Illumina [463185]	N
133	rs242559	17	43719143	rs393152	2016-07-08	26077951	Kouri N	2015-06-16	Nat Commun	www.ncbi.nlm.nih.gov/pubmed/26077951	Genome-wide association study of corticobasal degeneration identifies risk variants shared with progressive supranuclear palsy.	Corticobasal degeneration	152 cases, 3,111 controls	67 cases, 457 controls	17q21.31	MAPT	MGC57346-CRHR1, CRHR1-IT1			104909134, 147081			rs393152-?	non_coding_transcript_exon_variant	0	NR	1e-12		3.7	[NR]	Illumina [533898] (imputed)	N
133	rs35116560	17	43795433	rs11655470	2012-05-25	22504419	Taal HR	2012-04-15	Nat Genet	www.ncbi.nlm.nih.gov/pubmed/22504419	Common variants at 12q15 and 12q24 are associated with infant head circumference.	Head circumference (infant)	10,768 European ancestry infants	8,321 European ancestry infants	17q21.31	MAPT, CRHR1	MGC57346-CRHR1			104909134			rs11655470-T	intron_variant	0	0.49	4e-06		0.048	[0.028-0.068] SD increase	Affymetrix, Illumina [~ 2400000] (imputed)	N
133	rs35116560	17	43805194	rs9303521	2009-10-16	19801982	Rivadeneira F	2009-10-04	Nat Genet	www.ncbi.nlm.nih.gov/pubmed/19801982	Twenty bone-mineral-density loci identified by large-scale meta-analysis of genome-wide association studies.	Bone mineral density (hip)	19,195 European ancestry individuals	NA	17q21.31	CRHR1	MGC57346-CRHR1			104909134			rs9303521-T	intron_variant	0	0.46	4e-06		0.06	[0.04-0.07] s.d. decrease	Affymetrix, Illumina [2543686] (imputed)	N
133	rs35116560	17	43805194	rs9303521	2009-10-16	19801982	Rivadeneira F	2009-10-04	Nat Genet	www.ncbi.nlm.nih.gov/pubmed/19801982	Twenty bone-mineral-density loci identified by large-scale meta-analysis of genome-wide association studies.	Bone mineral density (spine)	19,195 European ancestry individuals	NA	17q21.31	CRHR1	MGC57346-CRHR1			104909134			rs9303521-T	intron_variant	0	0.46	1e-08		0.07	[0.05-0.09] s.d. decrease	Affymetrix, Illumina [2543686] (imputed)	N
133	rs35116560	17	43805194	rs9303521	2017-03-20	27629089	Sailer A	2016-09-14	Neurology	www.ncbi.nlm.nih.gov/pubmed/27629089	A genome-wide association study in multiple system atrophy.	Multiple system atrophy	918 European ancestry cases, 3,864 European ancestry controls	NA	17q21.31	CRHR1, MAPT	MGC57346-CRHR1			104909134			rs9303521-G	intron_variant	0	0.49	7e-07		1.31579		Illumina [4903804] (imputed)	N
133	rs242559	17	43824360	rs7207400	2016-02-03	25778476	Jun G	2015-03-17	Mol Psychiatry	www.ncbi.nlm.nih.gov/pubmed/25778476	A novel Alzheimer disease locus located near the gene encoding tau protein.	Alzheimer's disease in APOE e4- carriers	7,184 cases, 26,968 controls	718 European ancestry cases, 1,699 European ancestry controls	17q21.31	CRHR1	MGC57346-CRHR1			104909134			rs7207400-T	intron_variant	0	0.75	5e-06		1.13636	[1.08-1.2]	NR [NR]	N
133	rs242559	17	43826637	rs12150672	2017-05-11	28017375	van Rooij FJ	2016-12-22	Am J Hum Genet	www.ncbi.nlm.nih.gov/pubmed/28017375	Genome-wide Trans-ethnic Meta-analysis Identifies Seven Genetic Loci Influencing Erythrocyte Traits and a Role for RBPMS in Erythropoiesis.	Red blood cell count	up to 40,258 European ancestry individuals, up to 16,128 African American individuals, up to 15,252 East Asian individuals.	16,389 individuals of European and African American ancestry.	17q21.31	NR	MGC57346-CRHR1			104909134			rs12150672-?	intron_variant	0	NR	4e-09				NR [2500000] (imputed)	N
133	rs242559	17	43850932	rs113518470	2017-05-11	27182965	Pickrell JK	2016-05-16	Nat Genet	www.ncbi.nlm.nih.gov/pubmed/27182965	Detection and interpretation of shared genetic influences on 42 human traits.	Joint mobility (Beighton score)	64,143 European ancestry individuals	NA	17q21.31	LRRC37A3, CRHR1	MGC57346-CRHR1			104909134			rs113518470-?	intron_variant	0	NR	6e-11		0.09	[0.116-0.063] unit decrease	Illumina [12039492] (imputed)	N
133	rs242559	17	43857989	rs111433752	2016-12-13	27067015	Smith DJ	2016-04-12	Mol Psychiatry	www.ncbi.nlm.nih.gov/pubmed/27067015	Genome-wide analysis of over 106â€‰000 individuals identifies 9 neuroticism-associated loci.	Neuroticism	91,370 European ancestry individuals, 15,346 individuals	NA	17q21.31	Intergenic	MGC57346-CRHR1			104909134			rs111433752-T	intron_variant	0	0.79	9e-12		0.12	[0.085-0.155] unit decrease	Affymetrix [7207648] (imputed)	N
133	rs242559	17	43893716	rs8072451	2015-11-03	25607358	Hibar DP	2015-01-21	Nature	www.ncbi.nlm.nih.gov/pubmed/25607358	Common genetic variants influence human subcortical brain structures.	Subcortical brain region volumes	up to 13,171 European ancestry individuals	up to 15,130 European ancestry individuals, 545 Japanese ancestry individuals, 736 Mexican American individuals	17q21.31	MAPT, GRN, CRHR1, STH	CRHR1, MGC57346-CRHR1			1394, 104909134			rs8072451-?	intron_variant	0	NR	1e-08	(Intracranial volume, EA)	14490	[9539.28-19440.70] unit decrease	Affymetrix, Illumina [NR] (imputed)	N
133	rs242559	17	43906828	rs17689882	2015-11-03	25607358	Hibar DP	2015-01-21	Nature	www.ncbi.nlm.nih.gov/pubmed/25607358	Common genetic variants influence human subcortical brain structures.	Subcortical brain region volumes	up to 13,171 European ancestry individuals	up to 15,130 European ancestry individuals, 545 Japanese ancestry individuals, 736 Mexican American individuals	17q21.31	CRHR1	CRHR1, MGC57346-CRHR1			1394, 104909134			rs17689882-A	intron_variant	0	0.22	8e-09	(Intracranial volume, EA)	13460.5	[8891.61-18029.33] mm3 decrease	Affymetrix, Illumina [NR] (imputed)	N
133	rs242559	17	43923683	rs12185268	2011-07-20	21738487	Do CB	2011-06-23	PLoS Genet	www.ncbi.nlm.nih.gov/pubmed/21738487	Web-based genome-wide association study identifies two novel loci and a substantial genetic component for Parkinson's disease.	Parkinson's disease	3,426 European ancestry cases, 29,624 European ancestry controls	NA	17q21.31	MAPT	SPPL2C, MAPT-AS1			162540, 100128977			rs12185268-A	missense_variant	0	0.79	3e-14		1.3	[1.22-1.39]	Illumina [522782]	N
133	rs242559	17	43923683	rs12185268	2016-07-08	26077951	Kouri N	2015-06-16	Nat Commun	www.ncbi.nlm.nih.gov/pubmed/26077951	Genome-wide association study of corticobasal degeneration identifies risk variants shared with progressive supranuclear palsy.	Corticobasal degeneration	152 cases, 1,986 controls	NA	17q21.31	MAPT	SPPL2C, MAPT-AS1			162540, 100128977			rs12185268-?	missense_variant	0	NR	1e-09		3.46	[2.27-5.28]	Illumina [533898] (imputed)	N
133	rs242559	17	43924219	rs12373124	2012-08-15	22693459	Li R	2012-05-31	PLoS Genet	www.ncbi.nlm.nih.gov/pubmed/22693459	Six novel susceptibility Loci for early-onset androgenetic alopecia and their unexpected association with common diseases.	Male-pattern baldness	3,891 European ancestry cases, 8,915 European ancestry controls	NA	17q21.31	intergenic	MAPT-AS1, SPPL2C			100128977, 162540			rs12373124-T	synonymous_variant	0	0.438	5e-10		1.33	[1.21-1.45]	Affymetrix, Illumina [2391230] (imputed)	N
133	rs242559	17	43925297	rs17690703	2014-08-06	24429156	Noth I	2013-04-17	Lancet Respir Med	www.ncbi.nlm.nih.gov/pubmed/24429156	Genetic variants associated with idiopathic pulmonary fibrosis susceptibility and mortality: a genome-wide association study.	Idiopathic pulmonary fibrosis	542 European ancestry cases, 542 European ancestry controls	868 European ancestry cases, 1,389 European ancestry controls	17q21.31	SPPL2C, KANSL1, MAPT, CRHR1, STH	MAPT-AS1			100128977			rs17690703-C	intron_variant	0	0.76	6e-09		1.43	[1.27-1.61]	Affymetrix [10601812] (imputed)	N
133	rs242559	17	43977827	rs1864325	2013-04-11	22504420	Estrada K	2012-04-15	Nat Genet	www.ncbi.nlm.nih.gov/pubmed/22504420	Genome-wide meta-analysis identifies 56 bone mineral density loci and reveals 14 loci associated with risk of fracture.	Bone mineral density	Up to 32,961 European and East Asian ancestry individuals	Up to 50,933 European and East Asian ancestry individuals	17q21.31	MAPT	MAPT			4137			rs1864325-T	intron_variant	0	0.22	5e-11	(LSBMD)	0.04	[NR] unit decrease	Affymetrix, Illumina [~ 2500000] (imputed)	N
133	rs242559	17	43991515	rs192818565	2017-02-24	27225129	Okbay A	2016-05-26	Nature	www.ncbi.nlm.nih.gov/pubmed/27225129	Genome-wide association study identifies 74 loci associated with educational attainment.	Educational attainment (years of education)	405,072 European ancestry individuals	NA	17q21.31	NR	MAPT			4137			rs192818565-T	intron_variant	0	0.7988	2e-12		0.0204575	NR unit increase	Affymetrix, Illumina, Perlegen [~ 9300000] (imputed)	N
133	rs242559	17	43991515	rs192818565	2017-02-25	27225129	Okbay A	2016-05-26	Nature	www.ncbi.nlm.nih.gov/pubmed/27225129	Genome-wide association study identifies 74 loci associated with educational attainment.	Educational attainment (college completion)	280,007 European ancestry individuals	NA	17q21.31	NR	MAPT			4137			rs192818565-T	intron_variant	0	0.8097	5e-11		1.05349	[NR]	Affymetrix, Illumina, Perlegen [~ 9300000] (imputed)	N
133	rs242559	17	43994648	rs17649553	2015-05-09	25064009	Nalls MA	2014-07-27	Nat Genet	www.ncbi.nlm.nih.gov/pubmed/25064009	Large-scale meta-analysis of genome-wide association data identifies six new risk loci for Parkinson's disease.	Parkinson's disease	13,708 European ancestry cases, 95,282 European ancestry controls	5,353 European ancestry cases, 5,551 European ancestry controls	17q21.31	MAPT	MAPT			4137			rs17649553-C	intron_variant	0	0.774	2e-48		1.3	[1.27-1.34]	Illumina [7893274] (imputed)	N
133	rs242559	17	44056767	rs1981997	2013-11-01	23583980	Fingerlin TE	2013-04-14	Nat Genet	www.ncbi.nlm.nih.gov/pubmed/23583980	Genome-wide association study identifies multiple susceptibility loci for pulmonary fibrosis.	Interstitial lung disease	1,161 European ancestry cases, 4,683 European ancestry controls	876 European ancestry cases, 1,890 European ancestry controls	17q21.31	MAPT	MAPT			4137			rs1981997-G	non_coding_transcript_exon_variant	0	0.77	9e-14		1.41	[1.28-1.56]	Illumina [439828]	N
133	rs242559	17	44081064	rs8070723	2011-01-03	21044948	Spencer CC	2010-11-02	Hum Mol Genet	www.ncbi.nlm.nih.gov/pubmed/21044948	Dissection of the genetics of Parkinson's disease identifies an additional association 5' of SNCA and multiple associated haplotypes at 17q21.	Parkinson's disease	1,705 European ancestry cases, 5,175 European ancestry controls	1,039 European ancestry cases, 1,984 European ancestry controls	17q21.31	MAPT	MAPT			4137			rs8070723-?	intron_variant	0	0.76	7e-12		1.3	[1.19-1.43]	Illumina [532616]	N
133	rs242559	17	44081064	rs8070723	2011-07-14	21685912	Hoglinger GU	2011-06-19	Nat Genet	www.ncbi.nlm.nih.gov/pubmed/21685912	Identification of common variants influencing risk of the tauopathy progressive supranuclear palsy.	Progressive supranuclear palsy	1,069 European ancestry cases, 2,958 European ancestry controls, 45 cases, 329 controls	1,051 European ancestry cases, 3,560 European ancestry controls	17q21.31	MAPT	MAPT			4137			rs8070723-?	intron_variant	0	0.23	2e-118		5.11	[4.43-5.91]	Illumina [531451]	N
133	rs242559	17	44142332	rs193236081	2017-03-17	27089181	Okbay A	2016-04-18	Nat Genet	www.ncbi.nlm.nih.gov/pubmed/27089181	Genetic variants associated with subjective well-being, depressive symptoms, and neuroticism identified through genome-wide analyses.	Neuroticism	170,911 European ancestry individuals	NA	17q21.31	NR	KANSL1			284058			rs193236081-T	intron_variant	0	0.774	6e-11		0.0284134	[0.02-0.037] unit decrease	Affymetrix [up to 6544775] (imputed)	N
133	rs242559	17	44187257	rs9303525	2012-06-01	22504418	Ikram MA	2012-04-15	Nat Genet	www.ncbi.nlm.nih.gov/pubmed/22504418	Common variants at 6q22 and 17q21 are associated with intracranial volume.	Intracranial volume	8,175 European ancestry individuals	1,752 European ancestry individuals	17q21.31	MAPT, GRN, CRHR1, STH	KANSL1			284058			rs9303525-G	intron_variant	0	0.22	8e-15		14.9	[NR] ml decrease	Affymetrix, Illumina [2229753] (imputed)	N
133	rs242559	17	44187492	rs17577094	2014-12-05	24842889	Vacic V	2014-05-19	Hum Mol Genet	www.ncbi.nlm.nih.gov/pubmed/24842889	Genome-wide mapping of IBD segments in an Ashkenazi PD cohort identifies associated haplotypes.	Parkinson's disease	1,130 Ashkenazi Jewish cases, 2,611 Ashkenazi Jewish controls	306 Ashkenazi Jewish cases, 2,583 Ashkenazi Jewish controls	17q21.31	MAPT	KANSL1			284058			rs17577094-?	intron_variant	0	0.74	8e-09		1.56	[1.39-1.79]	Affymetrix, Illumina [1069161] (imputed)	N
133	rs242559	17	44192590	rs35524223	2017-06-16	28166213	Wain LV	2017-02-06	Nat Genet	www.ncbi.nlm.nih.gov/pubmed/28166213	Genome-wide association analyses for lung function and chronic obstructive pulmonary disease identify new loci and potential druggable targets.	Lung function (FEV1)	48,943 European ancestry individuals.	57,176 European ancestry individuals, 38,199 individuals.	17q21.31	KANSL1	KANSL1			284058			rs35524223-A	intron_variant	0	0.22	1e-13		0.061	[0.045-0.077] unit decrease	Affymetrix [up to 27624732] (imputed)	N
133	rs242559	17	44192590	rs35524223	2017-06-16	28166213	Wain LV	2017-02-06	Nat Genet	www.ncbi.nlm.nih.gov/pubmed/28166213	Genome-wide association analyses for lung function and chronic obstructive pulmonary disease identify new loci and potential druggable targets.	Lung function (FVC)	48,943 European ancestry individuals.	57,176 European ancestry individuals, 38,199 individuals.	17q21.31	KANSL1	KANSL1			284058			rs35524223-A	intron_variant	0	0.2166	7e-13		0.059	[0.043-0.075] unit decrease	Affymetrix [27624732] (imputed)	N
133	rs242559	17	44364209	rs2732614	2016-09-27	26632684	Dong J	2015-11-01	Medicine (Baltimore)	www.ncbi.nlm.nih.gov/pubmed/26632684	Genome-wide Meta-analysis on the Sense of Smell Among US Older Adults.	Sense of smell	6,252 European ancestry individuals	NA	17q21.31	KIAA1267, LRRC37	LRRC37A, ARL17B			9884, 100506084			rs2732614-T	intron_variant	0	0.2	7e-06	(Ajusted for ApoE)	0.03	[0.01-0.05] ln(smell score+1) increase	Affymetrix, Illumina [2543887] (imputed)	N
133	rs242559	17	44364209	rs2732614	2016-09-27	26632684	Dong J	2015-11-01	Medicine (Baltimore)	www.ncbi.nlm.nih.gov/pubmed/26632684	Genome-wide Meta-analysis on the Sense of Smell Among US Older Adults.	Sense of smell	6,252 European ancestry individuals	NA	17q21.31	KIAA1267, LRRC37	LRRC37A, ARL17B			9884, 100506084			rs2732614-T	intron_variant	0	0.2	8e-06		0.03	[0.01-0.05] ln(smell score+1) increase	Affymetrix, Illumina [2543887] (imputed)	N
133	rs242559	17	44788310	rs183211	2011-09-14	21812969	Liu X	2011-08-03	BMC Med Genet	www.ncbi.nlm.nih.gov/pubmed/21812969	Genome-wide association study identifies candidate genes for Parkinson's disease in an Ashkenazi Jewish population.	Parkinson's disease	268 Ashkenazi Jewish cases, 178 Ashkenazi Jewish controls	1,782 European ancestry cases, 1,658 European ancestry controls	17q21.31	NSF	NSF			4905			rs183211-T	intron_variant	0	0.24	3e-07				Illumina [525124]	N
133	rs242559	17	44788310	rs183211	2013-08-02	23544013	Couch FJ	2013-03-27	PLoS Genet	www.ncbi.nlm.nih.gov/pubmed/23544013	Genome-wide association study in BRCA1 mutation carriers identifies novel loci associated with breast and ovarian cancer risk.	Ovarian cancer in BRCA1 mutation carriers	683 European ancestry cases, 2,044 European ancestry controls	1,706 European ancestry cases, 10,258 European ancestry controls	17q21.31	intergenic	NSF			4905			rs183211-A	intron_variant	0	0.23	3e-08		1.25	[1.16-1.35]	Illumina [2568349] (imputed)	N
133	rs242559	17	44788310	rs183211	2013-08-02	23544013	Couch FJ	2013-03-27	PLoS Genet	www.ncbi.nlm.nih.gov/pubmed/23544013	Genome-wide association study in BRCA1 mutation carriers identifies novel loci associated with breast and ovarian cancer risk.	Ovarian cancer in BRCA1 mutation carriers	683 European ancestry cases, 2,044 European ancestry controls	1,706 European ancestry cases, 10,258 European ancestry controls	17q21.31	NR	NSF			4905			rs183211-?	intron_variant	0	NR	3e-08				Illumina [2568349] (imputed)	N
133	rs242559	17	44788310	rs183211	2015-12-18	25581431	Kuchenbaecker KB	2015-01-12	Nat Genet	www.ncbi.nlm.nih.gov/pubmed/25581431	Identification of six new susceptibility loci for invasive epithelial ovarian cancer.	Epithelial ovarian cancer	4,368 European ancestry cases, 9,123 European ancestry controls,	2,462 European ancestry BRCA1 mutation carrier cases, 12,790 European ancestry BRCA1 mutation carrier controls, up to 631 European ancestry BRCA2 mutation carrier cases, 7,580 European ancestry BRCA2 mutation carrier controls, 9,627 European ancestry serous cases, 1,442 European ancestry non-serous cases, 21,722 European ancestry controls	17q21.31	PLEKHM1	NSF			4905			rs183211-A	intron_variant	0	0.24	2e-13		1.11	[1.07-1.16]	Illumina [up to 10962898] (imputed)	N
133	rs242559	17	44819565	rs199443	2016-09-27	26632684	Dong J	2015-11-01	Medicine (Baltimore)	www.ncbi.nlm.nih.gov/pubmed/26632684	Genome-wide Meta-analysis on the Sense of Smell Among US Older Adults.	Sense of smell	6,252 European ancestry individuals	NA	17q21.31	NSF	NSF			4905			rs199443-T	intron_variant	0	0.2	3e-06	(Ajusted for ApoE)	0.03	[0.01-0.05] ln(smell score+1) increase	Affymetrix, Illumina [2543887] (imputed)	N
133	rs242559	17	44819565	rs199443	2016-09-27	26632684	Dong J	2015-11-01	Medicine (Baltimore)	www.ncbi.nlm.nih.gov/pubmed/26632684	Genome-wide Meta-analysis on the Sense of Smell Among US Older Adults.	Sense of smell	6,252 European ancestry individuals	NA	17q21.31	NSF	NSF			4905			rs199443-T	intron_variant	0	0.2	4e-06		0.03	[0.01-0.05] ln(smell score+1) increase	Affymetrix, Illumina [2543887] (imputed)	N
133	rs242559	17	44828931	rs199533	2009-12-10	19915575	Simon-Sanchez J	2009-11-15	Nat Genet	www.ncbi.nlm.nih.gov/pubmed/19915575	Genome-wide association study reveals genetic risk underlying Parkinson's disease.	Parkinson's disease	1,713 European ancestry cases, 3,978 European ancestry controls	3,361 European ancestry cases, 4,573 European ancestry controls	17q21.31	NSF	NSF			4905			rs199533-C	synonymous_variant	0	0.83	1e-14		1.28	[NR]	Illumina [463185]	N
133	rs242559	17	44828931	rs199533	2010-09-22	20711177	Hamza TH	2010-08-15	Nat Genet	www.ncbi.nlm.nih.gov/pubmed/20711177	Common genetic variation in the HLA region is associated with late-onset sporadic Parkinson's disease.	Parkinson's disease	2,000 European ancestry cases, 1,986 European ancestry controls	Up to 1,447 cases, 1,468 controls	17q21.31	MAPT	NSF			4905			rs199533-C	synonymous_variant	0	0.78	1e-06		1.35	[1.19-1.52]	Illumina [811597]	N
133	rs242559	17	44856641	rs199515	2012-04-20	22451204	Pankratz N	2012-03-01	Ann Neurol	www.ncbi.nlm.nih.gov/pubmed/22451204	Meta-analysis of Parkinson's disease: identification of a novel locus, RIT2.	Parkinson's disease	4,238 European ancestry cases, 4,239 European ancestry controls	3,738 European ancestry cases, 2,111 European ancestry controls	17q21.31	WNT3	WNT3			7473			rs199515-?	intron_variant	0	NR	3e-17		1.32	[NR]	Illumina [2500000] (imputed)	N
133	rs242559	17	44859144	rs415430	2011-09-14	21812969	Liu X	2011-08-03	BMC Med Genet	www.ncbi.nlm.nih.gov/pubmed/21812969	Genome-wide association study identifies candidate genes for Parkinson's disease in an Ashkenazi Jewish population.	Parkinson's disease	268 Ashkenazi Jewish cases, 178 Ashkenazi Jewish controls	1,782 European ancestry cases, 1,658 European ancestry controls	17q21.31	WNT3	WNT3			7473			rs415430-T	intron_variant	0	0.786	7e-07				Illumina [525124]	N
133	rs2074404	17	44863133	rs916888	2016-10-14	26634245	Lutz SM	2015-12-03	BMC Genet	www.ncbi.nlm.nih.gov/pubmed/26634245	A genome-wide association study identifies risk loci for spirometric measures among smokers of European and African ancestry.	Post bronchodilator FEV1	10,094 European ancestry current and former smoker individuals, 3,260 African American current and former smoker individuals, 178 current and former smoker individuals	NA	17q21.31	WNT3	WNT3			7473			rs916888-T	intron_variant	0	0.763	5e-06		0.051	NR unit increase	Illumina [NR] (imputed)	N
133	rs2074404	17	44863133	rs916888	2017-03-20	27629089	Sailer A	2016-09-14	Neurology	www.ncbi.nlm.nih.gov/pubmed/27629089	A genome-wide association study in multiple system atrophy.	Multiple system atrophy	918 European ancestry cases, 3,864 European ancestry controls	NA	17q21.31	WNT3	WNT3			7473			rs916888-T	intron_variant	0	0.75	4e-06		1.35		Illumina [4903804] (imputed)	N
133	rs2074404	17	44863133	rs916888	2017-05-24	28093568	Trampush JW	2017-01-17	Mol Psychiatry	www.ncbi.nlm.nih.gov/pubmed/28093568	GWAS meta-analysis reveals novel loci and genetic correlates for general cognitive function: a report from the COGENT consortium.	Cognitive function	up to 35,298 European ancestry individuals	NA	17q21.31	WNT3	WNT3			7473			rs916888-?	intron_variant	0	NR	8e-08		0.05	[0.032-0.068] unit increase	Affymetrix, Illumina [8037763] (imputed)	N
133	rs2074404	17	44865439	rs2074404	2010-03-29	20190752	Dubois PC	2010-02-28	Nat Genet	www.ncbi.nlm.nih.gov/pubmed/20190752	Multiple common variants for celiac disease influencing immune gene expression.	Celiac disease	4,533 European ancestry cases, 10,750 European ancestry controls	4,918 European ancestry cases, 5,684 European ancestry controls	17q21.31	intergenic	WNT3			7473			rs2074404-?	intron_variant	0	0.75	1e-06		1.11	[1.06-1.16]	Illumina [292387]	N
133	rs2074404	17	44865498	rs199499	2016-02-03	25778476	Jun G	2015-03-17	Mol Psychiatry	www.ncbi.nlm.nih.gov/pubmed/25778476	A novel Alzheimer disease locus located near the gene encoding tau protein.	Alzheimer's disease in APOE e4- carriers	7,184 cases, 26,968 controls	718 European ancestry cases, 1,699 European ancestry controls	17q21.31	WNT3	WNT3			7473			rs199499-C	intron_variant	0	0.81	6e-06		1.16279	[1.09-1.23]	NR [NR]	N
133	rs2074404	17	44865603	rs199498	2014-10-21	24511991	Hill-Burns EM	2014-02-10	BMC Genomics	www.ncbi.nlm.nih.gov/pubmed/24511991	Identification of a novel Parkinson's disease locus via stratified genome-wide association study.	Parkinson's disease	1,565 European ancestry sproadic Parkinson's disease cases, 435 European ancestry familial Parkinson's disease cases, 1,986 European ancestry controls	1,528 European ancestry sporadic Parkinson's disease cases, 707 European ancestry familial Parkinson's disease cases, 796 European ancestry controls	17q21.31	MAPT	WNT3			7473			rs199498-T	intron_variant	0	0.764	2e-06		1.35	[1.25-1.45]	Illumina [811597]	N
133	rs2074404	17	44865603	rs199498	2014-10-21	24511991	Hill-Burns EM	2014-02-10	BMC Genomics	www.ncbi.nlm.nih.gov/pubmed/24511991	Identification of a novel Parkinson's disease locus via stratified genome-wide association study.	Parkinson's disease	1,565 European ancestry sproadic Parkinson's disease cases, 435 European ancestry familial Parkinson's disease cases, 1,986 European ancestry controls	1,528 European ancestry sporadic Parkinson's disease cases, 707 European ancestry familial Parkinson's disease cases, 796 European ancestry controls	17q21.31	MAPT	WNT3			7473			rs199498-T	intron_variant	0	0.764	8e-07	(Familial)	1.69	[1.57-1.81]	Illumina [811597]	N
134	rs74370218	17	56501420	rs2429369	2015-11-08	25644384	Davies G	2015-02-03	Mol Psychiatry	www.ncbi.nlm.nih.gov/pubmed/25644384	Genetic contributions to variation in general cognitive function: a meta-analysis of genome-wide association studies in the CHARGE consortium (N=53â€‰949).	Cognitive function	51,719 European ancestry individuals 1,473 Erasmus Rupchen (founder/genetic isolate) individuals, 327 Korculan (founder/genetic isolate) individuals, 430 Orcadian (founder/genetic isolate) individuals	NA	17q22	SKA2, MTMR4, SEPT4, LOC101927688, TEX14, PPM1E, TRIM37, RAD51C, RNF43, HSF5	HSF5			124535			rs2429369-?	intron_variant	0	NR	3e-07		0.0295	[0.018-0.041] unit decrease	Affymetrix, Illumina [2478500] (imputed)	N
134	rs74370218	17	56584205	rs2302189	2011-10-16	21940522	Shaffer JR	2011-09-21	J Dent Res	www.ncbi.nlm.nih.gov/pubmed/21940522	Genome-wide association scan for childhood caries implicates novel genes.	Dental caries	1,305 European ancestry children	1,695 European ancestry children	17q22	intergenic	MTMR4			9110			rs2302189-?	missense_variant	0	NR	8e-06		1.33	[-0.76720-3.42720]	Illumina [1450678] (imputed)	N
134	rs74370218	17	56709034	rs411988	2015-06-14	25352340	Benyamin B	2014-10-29	Nat Commun	www.ncbi.nlm.nih.gov/pubmed/25352340	Novel loci affecting iron homeostasis and their effects in individuals at risk for hemochromatosis.	Iron status biomarkers (ferritin levels)	23,986 European ancestry individuals	Up to 24,986 European ancestry individuals	17q22	TEX14	TEX14			56155			rs411988-A	non_coding_transcript_exon_variant	0	0.564	2e-10		0.044	[0.03-0.058] unit decrease	Affymetrix, Illumina [~ 2100000] (imputed)	N
134	rs74370218	17	56709058	rs412000	2013-11-15	23704328	Fatemifar G	2013-05-23	Hum Mol Genet	www.ncbi.nlm.nih.gov/pubmed/23704328	Genome-wide association study of primary tooth eruption identifies pleiotropic loci associated with height and craniofacial distances.	Primary tooth development (time to first tooth eruption)	11,118 European ancestry individuals		17q22	RAD51C, TEX14	TEX14			56155			rs412000-C	non_coding_transcript_exon_variant	0	NR	2e-09		0.1641	[0.11-0.22] unit decrease	Illumina [2446724] (imputed)	N
134	rs74370218	17	57229716	rs7502947	2017-02-27	27490719	Bacelis J	2016-08-04	PLoS One	www.ncbi.nlm.nih.gov/pubmed/27490719	Literature-Informed Analysis of a Genome-Wide Association Study of Gestational Age in Norwegian Women and Children Suggests Involvement of Inflammatory Pathways.	Gestational age at birth in labor-initiated deliveries (child effect)	884 Norwegian ancestry children	NA	17q22	NR	SKA2			348235			rs7502947-G	intron_variant	0		2e-06				NR [525577]	N
136	rs17411061	18	50735418	rs62100765	2017-02-24	27225129	Okbay A	2016-05-26	Nature	www.ncbi.nlm.nih.gov/pubmed/27225129	Genome-wide association study identifies 74 loci associated with educational attainment.	Educational attainment (years of education)	405,072 European ancestry individuals	NA	18q21.2	NR	DCC			1630			rs62100765-T	intron_variant	0	0.4155	1e-10		0.0145547	NR unit decrease	Affymetrix, Illumina, Perlegen [~ 9300000] (imputed)	N
136	rs9949444	18	50746748	rs4632195	2016-07-23	26198764	Goes FS	2015-07-21	Am J Med Genet B Neuropsychiatr Genet	www.ncbi.nlm.nih.gov/pubmed/26198764	Genome-wide association study of schizophrenia in Ashkenazi Jews.	Schizophrenia	592 Ashkenazi Jewish ancestry cases, 505 Ashkenazi Jewish ancestry controls, 36,989 cases, 113,075 controls	NA	18q21.2	NR	DCC			1630			rs4632195-T	intron_variant	0	NR	4e-06		1.05	[NR]	Illumina [7158791] (imputed)	N
136	rs9949444	18	50746748	rs4632195	2017-03-17	27089181	Okbay A	2016-04-18	Nat Genet	www.ncbi.nlm.nih.gov/pubmed/27089181	Genetic variants associated with subjective well-being, depressive symptoms, and neuroticism identified through genome-wide analyses.	Neuroticism	170,911 European ancestry individuals	NA	18q21.2	NR	DCC			1630			rs4632195-T	intron_variant	0	0.516	5e-07		0.0175357	[0.011-0.024] unit increase	Affymetrix [up to 6544775] (imputed)	N
136	rs17411061	18	50818827	rs62097986	2015-11-03	25607358	Hibar DP	2015-01-21	Nature	www.ncbi.nlm.nih.gov/pubmed/25607358	Common genetic variants influence human subcortical brain structures.	Subcortical brain region volumes	up to 13,171 European ancestry individuals	up to 15,130 European ancestry individuals, 545 Japanese ancestry individuals, 736 Mexican American individuals	18q21.2	DCC	DCC			1630			rs62097986-A	intron_variant	0	0.44	1e-13	(Putamen, EA)	30.28	[22.30-38.26] mm3 increase	Affymetrix, Illumina [NR] (imputed)	N
136	rs11662271	18	50906031	rs11876941	2013-02-14	23192594	Velez Edwards DR	2012-11-29	Hum Genet	www.ncbi.nlm.nih.gov/pubmed/23192594	Gene-environment interactions and obesity traits among postmenopausal African-American and Hispanic women in the Women's Health Initiative SHARe Study.	Body mass index (interaction)	8,203 African American females, 3,484 Hispanic females	NA	18q21.2	DCC	DCC			1630			rs11876941-A	intron_variant	0	NR	5e-06	(Smoking, ever/never)	0.003	[NR] unit decrease	Affymetrix [706791]	N
139	rs6074798	20	14747471	rs4141463	2010-09-10	20663923	Anney R	2010-07-27	Hum Mol Genet	www.ncbi.nlm.nih.gov/pubmed/20663923	A genome-wide scan for common alleles affecting risk for autism.	Autism	1,385 child cases from 1,369 families	1,086 child cases from 595 families, 1,965 European, African American and other ancestry controls	20p12.1	MACROD2	MACROD2			140733			rs4141463-?	intron_variant	0	0.57	4e-08	(Str)	1.37	[1.22-1.52]	Illumina [842348]	N
140	rs2425161	20	34383634	rs11906854	2014-01-08	23793025	Anttila V	2013-06-23	Nat Genet	www.ncbi.nlm.nih.gov/pubmed/23793025	Genome-wide meta-analysis identifies new susceptibility loci for migraine.	Migraine - clinic-based	5,175 European ancestry clinic-based cases, 13,972 European ancestry clinic-based controls	NA	20q11.22	intergenic	PHF20			51230			rs11906854-G	intron_variant	0	0.14	7e-06		1.17	[1.09-1.26]	Affymetrix, Illumina [~ 2300000] (imputed)	N
140	rs2425161	20	34432670	rs2425163	2015-09-24	25282103	Wood AR	2014-10-05	Nat Genet	www.ncbi.nlm.nih.gov/pubmed/25282103	Defining the role of common variation in the genomic and biological architecture of adult human height.	Height	253,288 European ancestry individuals	80,067 European ancestry individuals	20q11.23	PHF20	PHF20			51230			rs2425163-A	intron_variant	0	0.82	3e-52		0.058	[0.05-0.066] unit decrease	Affymetrix, Illumina, Perlegen [2550858] (imputed)	N
140	rs2425161	20	34544647	rs6060717	2017-05-23	25673412	Shungin D	2015-02-12	Nature	www.ncbi.nlm.nih.gov/pubmed/25673412	New genetic loci link adipose and insulin biology to body fat distribution.	Hip circumference adjusted for BMI	up to 56,910 European ancestry men, up to 86,570 European ancestry women	up to 36,570 European ancestry men, 30,172 European ancestry women, 915 Filipino ancestry men, 735 Filipino ancestry women, 2,351 African American/Afro-Caribbean ancestry men, 6,258 African American/Afro-Caribbean ancestry women, 2,285 South Asian ancestry men, 506 South Asian ancestry women, 195 Seychellois ancestry men, 266 Seychellois ancestry women	20q11.23	SCAND1	CNBD2			140894			rs6060717-T	intron_variant	0	0.8225	1e-07	(EA, women)	0.0314	[0.02-0.043] unit decrease	Affymetrix, Illumina, Perlegen [up to 2542447] (imputed)	N
140	rs2425161	20	34544647	rs6060717	2017-05-23	25673412	Shungin D	2015-02-12	Nature	www.ncbi.nlm.nih.gov/pubmed/25673412	New genetic loci link adipose and insulin biology to body fat distribution.	Hip circumference adjusted for BMI	up to 56,910 European ancestry men, up to 86,570 European ancestry women	up to 36,570 European ancestry men, 30,172 European ancestry women, 915 Filipino ancestry men, 735 Filipino ancestry women, 2,351 African American/Afro-Caribbean ancestry men, 6,258 African American/Afro-Caribbean ancestry women, 2,285 South Asian ancestry men, 506 South Asian ancestry women, 195 Seychellois ancestry men, 266 Seychellois ancestry women	20q11.23	SCAND1	CNBD2			140894			rs6060717-T	intron_variant	0	0.8225	6e-12	(EA)	0.0323	[0.023-0.042] unit decrease	Affymetrix, Illumina, Perlegen [up to 2542447] (imputed)	N
140	rs2425161	20	34544647	rs6060717	2017-05-23	25673412	Shungin D	2015-02-12	Nature	www.ncbi.nlm.nih.gov/pubmed/25673412	New genetic loci link adipose and insulin biology to body fat distribution.	Hip circumference adjusted for BMI	up to 56,910 European ancestry men, up to 86,570 European ancestry women	up to 36,570 European ancestry men, 30,172 European ancestry women, 915 Filipino ancestry men, 735 Filipino ancestry women, 2,351 African American/Afro-Caribbean ancestry men, 6,258 African American/Afro-Caribbean ancestry women, 2,285 South Asian ancestry men, 506 South Asian ancestry women, 195 Seychellois ancestry men, 266 Seychellois ancestry women	20q11.23	SCAND1	CNBD2			140894			rs6060717-T	intron_variant	0	0.8225	8e-07	(EA,men)	0.0332	[0.02-0.046] unit decrease	Affymetrix, Illumina, Perlegen [up to 2542447] (imputed)	N
142	rs2064853	20	47523865	rs6095357	2016-07-23	26198764	Goes FS	2015-07-21	Am J Med Genet B Neuropsychiatr Genet	www.ncbi.nlm.nih.gov/pubmed/26198764	Genome-wide association study of schizophrenia in Ashkenazi Jews.	Schizophrenia	592 Ashkenazi Jewish ancestry cases, 505 Ashkenazi Jewish ancestry controls, 36,989 cases, 113,075 controls	NA	20q13.13	NR	LOC105372648 - ARFGEF2	105372648	10564		19155	14393	rs6095357-C	intergenic_variant	1	NR	7e-06		1.05263	[NR]	Illumina [7158791] (imputed)	N
142	rs2426132	20	47531286	rs6012558	2017-08-10	28443625	Justice AE	2017-04-26	Nat Commun	www.ncbi.nlm.nih.gov/pubmed/28443625	Genome-wide meta-analysis of 241,258 adults accounting for smoking behaviour identifies novel loci for obesity traits.	Waist circumference adjusted for BMI (adjusted for smoking behaviour)	97,400 European ancestry women, 63,892 European ancestry men, 5,829 European ancestry individuals, 10,500 African American/Afro-Caribbean ancestry women, 2,706 African American/Afro-Caribbean ancestry men, 1,030 Indian Asian ancestry women, 7,648 Indian Asian ancestry men, 1,793 Filipino ancestry women, 2,944 Hispanic/Latino ancestry women, 1,764 Hispanic/Latino ancestry men	21,496 European ancestry women, 24,385 European ancestry men, 118,364 European ancestry individuals, 2,326 African American/Afro-Caribbean ancestry women, 855 African American/Afro-Caribbean ancestry men	20q13.13	ARFGEF2	LOC105372648 - ARFGEF2	105372648	10564		26576	6972	rs6012558-A	intergenic_variant	1	0.412	2e-09		0.016	[0.01-0.022] unit increase	Affymetrix, Illumina, Perlegen [up to 2800000] (imputed)	N
142	rs2426132	20	47531286	rs6012558	2017-08-10	28443625	Justice AE	2017-04-26	Nat Commun	www.ncbi.nlm.nih.gov/pubmed/28443625	Genome-wide meta-analysis of 241,258 adults accounting for smoking behaviour identifies novel loci for obesity traits.	Waist circumference adjusted for BMI in non-smokers	77,113 European ancestry women, 47,319 European ancestry men, 4,856 European ancestry individuals, 8,799 African American/Afro-Caribbean ancestry women, 1,803 African American/Afro-Caribbean ancestry men, 1,020 Indian Asian ancestry women, 6,691 Indian Asian ancestry men, 1,526 Filipino ancestry women, 2,469 Hispanic/Latino ancestry women, 1,318 Hispanic/Latino ancestry men	16,011 European ancestry women, 17,912 European ancestry men, 105,218 European ancestry individuals, 2,073 African American/Afro-Caribbean ancestry women, 647 African American/Afro-Caribbean ancestry men	20q13.13	ARFGEF2	LOC105372648 - ARFGEF2	105372648	10564		26576	6972	rs6012558-A	intergenic_variant	1	0.412	3e-06		0.014	[0.0081-0.0199] unit increase	Affymetrix, Illumina, Perlegen [up to 2800000] (imputed)	N
142	rs2426132	20	47531286	rs6012558	2017-08-10	28443625	Justice AE	2017-04-26	Nat Commun	www.ncbi.nlm.nih.gov/pubmed/28443625	Genome-wide meta-analysis of 241,258 adults accounting for smoking behaviour identifies novel loci for obesity traits.	Waist circumference adjusted for BMI (joint analysis main effects and smoking interaction)	97,400 European ancestry women, 63,892 European ancestry men, 5,829 European ancestry individuals, 10,500 African American/Afro-Caribbean ancestry women, 2,706 African American/Afro-Caribbean ancestry men, 1,030 Indian Asian ancestry women, 7,648 Indian Asian ancestry men, 1,793 Filipino ancestry women, 2,944 Hispanic/Latino ancestry women, 1,764 Hispanic/Latino ancestry men	21,496 European ancestry women, 24,385 European ancestry men, 118,364 European ancestry individuals, 2,326 African American/Afro-Caribbean ancestry women, 855 African American/Afro-Caribbean ancestry men	20q13.13	ARFGEF2	LOC105372648 - ARFGEF2	105372648	10564		26576	6972	rs6012558-A	intergenic_variant	1	NR	3e-09				Affymetrix, Illumina, Perlegen [up to 2800000] (imputed)	N
142	rs2064853	20	47535298	rs4810896	2017-03-17	27089181	Okbay A	2016-04-18	Nat Genet	www.ncbi.nlm.nih.gov/pubmed/27089181	Genetic variants associated with subjective well-being, depressive symptoms, and neuroticism identified through genome-wide analyses.	Depression	105,739 European ancestry individuals, 16,471 European ancestry major depressive disorder cases, 58,835 European ancestry controls	368,890 European ancestry individuals	20q13.13	NR	LOC105372648 - ARFGEF2	105372648	10564		30588	2960	rs4810896-A	upstream_gene_variant	1	NR	4e-09		5.87945	[NR] z score decrease	Affymetrix [up to 6544862] (imputed)	N
142	rs2064853	20	47541600	rs6012564	2014-10-01	24489884	Mick E	2014-01-01	PLoS One	www.ncbi.nlm.nih.gov/pubmed/24489884	Genome-wide association study of proneness to anger.	Anger	8,747 European ancestry individuals	NA	20q13.13	ARFGEF2, STAU1, CSE1L	ARFGEF2			10564			rs6012564-G	intron_variant	0	0.406	7e-06	(Temperament)	0.12	[NR] unit increase	Affymetrix [677643]	N
142	rs2064853	20	47681882	rs6063349	2017-03-24	27622933	Li QS	2016-09-13	Transl Psychiatry	www.ncbi.nlm.nih.gov/pubmed/27622933	Analysis of 23andMe antidepressant efficacy survey data: implication of circadian rhythm and neuroplasticity in bupropion response.	Non-response to citalopram or escitalopram and depression	2,005 European ancestry non-responder cases, 192,083 European ancestry healthy controls	NA	20q13.13	CSE1L	CSE1L			1434			rs6063349-?	intron_variant	0		7e-07		1.18343	[1.11-1.27]	Illumina [~ 12000000] (imputed)	N
142	rs381262	20	47701024	rs2075677	2017-03-17	27089181	Okbay A	2016-04-18	Nat Genet	www.ncbi.nlm.nih.gov/pubmed/27089181	Genetic variants associated with subjective well-being, depressive symptoms, and neuroticism identified through genome-wide analyses.	Subjective well-being	298,420 Korculan (founder/genetic isolate), Split (founder/genetic isolate), Vis (founder/genetic isolate), Erasmus Rucphen (founder/genetic isolate) and other European ancestry individuals	NA	20q13.13	CSE1L	CSE1L			1434			rs2075677-A	intron_variant	0	0.7603	2e-08		0.0175	[0.011-0.024] unit increase	Affymetrix, Illumina, Perlegen [at least 5170349] (imputed)	N
142	rs6095417	20	47705496	rs1538482	2017-03-17	27089181	Okbay A	2016-04-18	Nat Genet	www.ncbi.nlm.nih.gov/pubmed/27089181	Genetic variants associated with subjective well-being, depressive symptoms, and neuroticism identified through genome-wide analyses.	Positive affect	180,281 Korculan (founder/genetic isolate), Split (founder/genetic isolate), Vis (founder/genetic isolate), Erasmus Rucphen (founder/genetic isolate) and other European ancestry individuals	NA	20q13.13	NR	CSE1L			1434			rs1538482-T	intron_variant	0	0.6958	1e-06		0.0177	[0.011-0.025] unit increase	Affymetrix, Illumina, Perlegen [at least 5170349] (imputed)	N
142	rs381262	20	47772264	rs17450430	2015-09-24	25282103	Wood AR	2014-10-05	Nat Genet	www.ncbi.nlm.nih.gov/pubmed/25282103	Defining the role of common variation in the genomic and biological architecture of adult human height.	Height	253,288 European ancestry individuals	80,067 European ancestry individuals	20q13.13	STAU1	STAU1			6780			rs17450430-A	intron_variant	0	0.761	2e-24		0.035	[0.029-0.041] unit decrease	Affymetrix, Illumina, Perlegen [2550858] (imputed)	N
142	rs381262	20	47881967	rs1567865	2015-07-07	25281659	van der Valk RJ	2014-10-03	Hum Mol Genet	www.ncbi.nlm.nih.gov/pubmed/25281659	A novel common variant in DCST2 is associated with length in early life and height in adulthood.	Infant length	28,238 European ancestry individuals	NA	20q13.13	ZNFX1	ZNFX1			57169			rs1567865-T	intron_variant	0	0.21	1e-09		0.063	[0.043-0.083] unit increase	Affymetrix, Illumina [2193675] (imputed)	N
142	rs381262	20	47903019	rs237743	2012-10-24	20881960	Lango Allen H	2010-09-29	Nature	www.ncbi.nlm.nih.gov/pubmed/20881960	Hundreds of variants clustered in genomic loci and biological pathways affect human height.	Height	133,653 European ancestry individuals	50,074 European ancestry individuals	20q13.13	ZNFX1	ZFAS1			441951			rs237743-A	intron_variant	0	0.21	1e-20		0.041	[NR] unit increase	Affymetrix, Illumina [2834208] (imputed)	N
145	rs1541102	21	40663181	rs2836974	2015-11-08	25644384	Davies G	2015-02-03	Mol Psychiatry	www.ncbi.nlm.nih.gov/pubmed/25644384	Genetic contributions to variation in general cognitive function: a meta-analysis of genome-wide association studies in the CHARGE consortium (N=53â€‰949).	Cognitive function	51,719 European ancestry individuals 1,473 Erasmus Rupchen (founder/genetic isolate) individuals, 327 Korculan (founder/genetic isolate) individuals, 430 Orcadian (founder/genetic isolate) individuals	NA	21q22.2	BRWD1	BRWD1			54014			rs2836974-?	intron_variant	0	NR	9e-07		0.0281	[0.017-0.039] unit increase	Affymetrix, Illumina [2478500] (imputed)	N
147	rs909674	22	39835587	rs4821897	2013-06-14	23382691	Lauc G	2013-01-31	PLoS Genet	www.ncbi.nlm.nih.gov/pubmed/23382691	Loci associated with N-glycosylation of human immunoglobulin G show pleiotropy with autoimmune diseases and haematological cancers.	IgG glycosylation	2,247 European ancestry individuals	NA	22q13.1	NR	LOC100506472 - MGAT3	100506472	4248		2454	7584	rs4821897-G	downstream_gene_variant	1	0.707129	3e-12	(IGP63)	0.2388	[0.17-0.31] unit increase	Illumina [~ 2500000] (imputed)	N
147	rs909674	22	39835587	rs4821897	2013-06-14	23382691	Lauc G	2013-01-31	PLoS Genet	www.ncbi.nlm.nih.gov/pubmed/23382691	Loci associated with N-glycosylation of human immunoglobulin G show pleiotropy with autoimmune diseases and haematological cancers.	IgG glycosylation	2,247 European ancestry individuals	NA	22q13.1	NR	LOC100506472 - MGAT3	100506472	4248		2454	7584	rs4821897-G	downstream_gene_variant	1	0.707166	4e-18	(IGP67)	0.2976	[0.23-0.36] unit decrease	Illumina [~ 2500000] (imputed)	N
147	rs909674	22	39837920	rs5757673	2016-10-14	26634245	Lutz SM	2015-12-03	BMC Genet	www.ncbi.nlm.nih.gov/pubmed/26634245	A genome-wide association study identifies risk loci for spirometric measures among smokers of European and African ancestry.	Post bronchodilator FEV1	10,094 European ancestry current and former smoker individuals, 3,260 African American current and former smoker individuals, 178 current and former smoker individuals	NA	22q13.1	Intergenic	LOC100506472 - MGAT3	100506472	4248		4787	5251	rs5757673-T	downstream_gene_variant	1	0.878	1e-06	(AA)	0.126	NR unit increase	Illumina [NR] (imputed)	N
147	rs909674	22	39841700	rs5757676	2013-06-14	23382691	Lauc G	2013-01-31	PLoS Genet	www.ncbi.nlm.nih.gov/pubmed/23382691	Loci associated with N-glycosylation of human immunoglobulin G show pleiotropy with autoimmune diseases and haematological cancers.	IgG glycosylation	2,247 European ancestry individuals	NA	22q13.1	NR	LOC100506472 - MGAT3	100506472	4248		8567	1471	rs5757676-C	intergenic_variant	1	0.775682	1e-07	(IGP36)	0.1968	[0.12-0.27] unit decrease	Illumina [~ 2500000] (imputed)	N
147	rs909674	22	39859169	rs909674	2013-06-14	23382691	Lauc G	2013-01-31	PLoS Genet	www.ncbi.nlm.nih.gov/pubmed/23382691	Loci associated with N-glycosylation of human immunoglobulin G show pleiotropy with autoimmune diseases and haematological cancers.	IgG glycosylation	1,848 European ancestry individuals	NA	22q13.1	MGAT3, TAB1, CACNA1I, SYNGR1	MGAT3			4248			rs909674-C	intron_variant	0	0.29096	2e-10	(IgG1G1N)	0.0721	[0.050-0.094] unit increase	Illumina [~ 2500000] (imputed)	N
147	rs909674	22	39859169	rs909674	2013-06-14	23382691	Lauc G	2013-01-31	PLoS Genet	www.ncbi.nlm.nih.gov/pubmed/23382691	Loci associated with N-glycosylation of human immunoglobulin G show pleiotropy with autoimmune diseases and haematological cancers.	IgG glycosylation	1,848 European ancestry individuals	NA	22q13.1	MGAT3, TAB1, CACNA1I, SYNGR1	MGAT3			4248			rs909674-C	intron_variant	0	0.29096	3e-08	(IgG1G0N)	0.083	[0.054-0.112] unit increase	Illumina [~ 2500000] (imputed)	N
147	rs909674	22	39859169	rs909674	2013-06-14	23382691	Lauc G	2013-01-31	PLoS Genet	www.ncbi.nlm.nih.gov/pubmed/23382691	Loci associated with N-glycosylation of human immunoglobulin G show pleiotropy with autoimmune diseases and haematological cancers.	IgG glycosylation	1,848 European ancestry individuals	NA	22q13.1	MGAT3, TAB1, CACNA1I, SYNGR1	MGAT3			4248			rs909674-C	intron_variant	0	0.29096	9e-06	(IgG1G2N)	0.0651	[0.036-0.094] unit increase	Illumina [~ 2500000] (imputed)	N
147	rs909674	22	39859169	rs909674	2013-06-14	23382691	Lauc G	2013-01-31	PLoS Genet	www.ncbi.nlm.nih.gov/pubmed/23382691	Loci associated with N-glycosylation of human immunoglobulin G show pleiotropy with autoimmune diseases and haematological cancers.	IgG glycosylation	2,247 European ancestry individuals	NA	22q13.1	MGAT3, TAB1, CACNA1I, SYNGR1	MGAT3			4248			rs909674-C	intron_variant	0	0.298476	9e-24	(IGP39)	0.3388	[0.27-0.4] unit increase	Illumina [~ 2500000] (imputed)	N
147	rs909674	22	39859169	rs909674	2013-06-14	23382691	Lauc G	2013-01-31	PLoS Genet	www.ncbi.nlm.nih.gov/pubmed/23382691	Loci associated with N-glycosylation of human immunoglobulin G show pleiotropy with autoimmune diseases and haematological cancers.	IgG glycosylation	2,247 European ancestry individuals	NA	22q13.1	MGAT3, TAB1, CACNA1I, SYNGR1	MGAT3			4248			rs909674-C	intron_variant	0	0.298878	2e-10	(IGP34)	0.2136	[0.15-0.28] unit increase	Illumina [~ 2500000] (imputed)	N
147	rs909674	22	39859169	rs909674	2013-06-14	23382691	Lauc G	2013-01-31	PLoS Genet	www.ncbi.nlm.nih.gov/pubmed/23382691	Loci associated with N-glycosylation of human immunoglobulin G show pleiotropy with autoimmune diseases and haematological cancers.	IgG glycosylation	2,247 European ancestry individuals	NA	22q13.1	MGAT3, TAB1, CACNA1I, SYNGR1	MGAT3			4248			rs909674-C	intron_variant	0	0.298924	1e-10	(IGP5)	0.2178	[0.15-0.28] unit increase	Illumina [~ 2500000] (imputed)	N
147	rs909674	22	39859169	rs909674	2013-06-14	23382691	Lauc G	2013-01-31	PLoS Genet	www.ncbi.nlm.nih.gov/pubmed/23382691	Loci associated with N-glycosylation of human immunoglobulin G show pleiotropy with autoimmune diseases and haematological cancers.	IgG glycosylation	2,247 European ancestry individuals	NA	22q13.1	MGAT3, TAB1, CACNA1I, SYNGR1	MGAT3			4248			rs909674-C	intron_variant	0	0.298924	5e-10	(IGP22)	0.2099	[0.14-0.28] unit decrease	Illumina [~ 2500000] (imputed)	N
147	rs909674	22	39859169	rs909674	2013-06-14	23382691	Lauc G	2013-01-31	PLoS Genet	www.ncbi.nlm.nih.gov/pubmed/23382691	Loci associated with N-glycosylation of human immunoglobulin G show pleiotropy with autoimmune diseases and haematological cancers.	IgG glycosylation	2,247 European ancestry individuals	NA	22q13.1	MGAT3, TAB1, CACNA1I, SYNGR1	MGAT3			4248			rs909674-C	intron_variant	0	0.298924	6e-10	(IGP68)	0.2094	[0.14-0.28] unit increase	Illumina [~ 2500000] (imputed)	N
147	rs909674	22	39859169	rs909674	2013-06-14	23382691	Lauc G	2013-01-31	PLoS Genet	www.ncbi.nlm.nih.gov/pubmed/23382691	Loci associated with N-glycosylation of human immunoglobulin G show pleiotropy with autoimmune diseases and haematological cancers.	IgG glycosylation	2,247 European ancestry individuals	NA	22q13.1	MGAT3, TAB1, CACNA1I, SYNGR1	MGAT3			4248			rs909674-C	intron_variant	0	0.299013	1e-16	(IGP66)	0.281	[0.21-0.35] unit increase	Illumina [~ 2500000] (imputed)	N
147	rs909674	22	39859169	rs909674	2013-06-14	23382691	Lauc G	2013-01-31	PLoS Genet	www.ncbi.nlm.nih.gov/pubmed/23382691	Loci associated with N-glycosylation of human immunoglobulin G show pleiotropy with autoimmune diseases and haematological cancers.	IgG glycosylation	2,247 European ancestry individuals	NA	22q13.1	MGAT3, TAB1, CACNA1I, SYNGR1	MGAT3			4248			rs909674-C	intron_variant	0	0.299013	1e-24	(IGP40)	0.3447	[0.28-0.41] unit increase	Illumina [~ 2500000] (imputed)	N
147	rs909674	22	39859169	rs909674	2013-06-14	23382691	Lauc G	2013-01-31	PLoS Genet	www.ncbi.nlm.nih.gov/pubmed/23382691	Loci associated with N-glycosylation of human immunoglobulin G show pleiotropy with autoimmune diseases and haematological cancers.	IgG glycosylation	2,247 European ancestry individuals	NA	22q13.1	MGAT3, TAB1, CACNA1I, SYNGR1	MGAT3			4248			rs909674-C	intron_variant	0	0.299013	3e-13	(IGP45)	0.2468	[0.18-0.31] unit increase	Illumina [~ 2500000] (imputed)	N
147	rs909674	22	39859169	rs909674	2013-06-14	23382691	Lauc G	2013-01-31	PLoS Genet	www.ncbi.nlm.nih.gov/pubmed/23382691	Loci associated with N-glycosylation of human immunoglobulin G show pleiotropy with autoimmune diseases and haematological cancers.	IgG glycosylation	2,247 European ancestry individuals	NA	22q13.1	MGAT3, TAB1, CACNA1I, SYNGR1	MGAT3			4248			rs909674-C	intron_variant	0	0.299013	3e-08	(IGP64)	0.1872	[0.12-0.25] unit decrease	Illumina [~ 2500000] (imputed)	N
147	rs909674	22	39859169	rs909674	2013-06-14	23382691	Lauc G	2013-01-31	PLoS Genet	www.ncbi.nlm.nih.gov/pubmed/23382691	Loci associated with N-glycosylation of human immunoglobulin G show pleiotropy with autoimmune diseases and haematological cancers.	IgG glycosylation	2,247 European ancestry individuals	NA	22q13.1	MGAT3, TAB1, CACNA1I, SYNGR1	MGAT3			4248			rs909674-C	intron_variant	0	0.299013	6e-16	(IGP71)	0.2737	[0.21-0.34] unit increase	Illumina [~ 2500000] (imputed)	N
147	rs909674	22	39859169	rs909674	2013-06-14	23382691	Lauc G	2013-01-31	PLoS Genet	www.ncbi.nlm.nih.gov/pubmed/23382691	Loci associated with N-glycosylation of human immunoglobulin G show pleiotropy with autoimmune diseases and haematological cancers.	IgG glycosylation	2,247 European ancestry individuals	NA	22q13.1	MGAT3, TAB1, CACNA1I, SYNGR1	MGAT3			4248			rs909674-C	intron_variant	0	0.299057	3e-09	(IGP49)	0.2003	[0.13-0.27] unit increase	Illumina [~ 2500000] (imputed)	N
147	rs909674	22	39859169	rs909674	2013-06-14	23382691	Lauc G	2013-01-31	PLoS Genet	www.ncbi.nlm.nih.gov/pubmed/23382691	Loci associated with N-glycosylation of human immunoglobulin G show pleiotropy with autoimmune diseases and haematological cancers.	IgG glycosylation	2,247 European ancestry individuals	NA	22q13.1	MGAT3, TAB1, CACNA1I, SYNGR1	MGAT3			4248			rs909674-C	intron_variant	0	0.299057	3e-09	(IGP9)	0.2011	[0.13-0.27] unit increase	Illumina [~ 2500000] (imputed)	N
147	rs909674	22	39859169	rs909674	2013-06-14	23382691	Lauc G	2013-01-31	PLoS Genet	www.ncbi.nlm.nih.gov/pubmed/23382691	Loci associated with N-glycosylation of human immunoglobulin G show pleiotropy with autoimmune diseases and haematological cancers.	IgG glycosylation	2,247 European ancestry individuals	NA	22q13.1	MGAT3, TAB1, CACNA1I, SYNGR1	MGAT3			4248			rs909674-C	intron_variant	0	0.2991	2e-06	(IGP30)	0.1606	[0.095-0.227] unit decrease	Illumina [~ 2500000] (imputed)	N
147	rs909674	22	39859169	rs909674	2013-06-14	23382691	Lauc G	2013-01-31	PLoS Genet	www.ncbi.nlm.nih.gov/pubmed/23382691	Loci associated with N-glycosylation of human immunoglobulin G show pleiotropy with autoimmune diseases and haematological cancers.	IgG glycosylation	2,247 European ancestry individuals	NA	22q13.1	MGAT3, TAB1, CACNA1I, SYNGR1	MGAT3			4248			rs909674-C	intron_variant	0	0.299146	2e-15	(IGP72)	0.2695	[0.2-0.34] unit decrease	Illumina [~ 2500000] (imputed)	N
147	rs909674	22	39859169	rs909674	2013-06-14	23382691	Lauc G	2013-01-31	PLoS Genet	www.ncbi.nlm.nih.gov/pubmed/23382691	Loci associated with N-glycosylation of human immunoglobulin G show pleiotropy with autoimmune diseases and haematological cancers.	IgG glycosylation	2,247 European ancestry individuals	NA	22q13.1	MGAT3, TAB1, CACNA1I, SYNGR1	MGAT3			4248			rs909674-C	intron_variant	0	0.299146	2e-10	(IGP62)	0.2148	[0.15-0.28] unit decrease	Illumina [~ 2500000] (imputed)	N
147	rs909674	22	39859169	rs909674	2013-06-14	23382691	Lauc G	2013-01-31	PLoS Genet	www.ncbi.nlm.nih.gov/pubmed/23382691	Loci associated with N-glycosylation of human immunoglobulin G show pleiotropy with autoimmune diseases and haematological cancers.	IgG glycosylation	2,247 European ancestry individuals	NA	22q13.1	MGAT3, TAB1, CACNA1I, SYNGR1	MGAT3			4248			rs909674-C	intron_variant	0	0.299323	9e-06	(IGP69)	0.151	[0.084-0.218] unit increase	Illumina [~ 2500000] (imputed)	N
147	rs909674	22	39859169	rs909674	2013-06-14	23382691	Lauc G	2013-01-31	PLoS Genet	www.ncbi.nlm.nih.gov/pubmed/23382691	Loci associated with N-glycosylation of human immunoglobulin G show pleiotropy with autoimmune diseases and haematological cancers.	IgG glycosylation	2,247 European ancestry individuals	NA	22q13.1	NR	MGAT3			4248			rs909674-C	intron_variant	0	0.299013	4e-16	(IGP70)	0.2754	[0.21-0.34] unit increase	Illumina [~ 2500000] (imputed)	N
[truncated: 13 more rows]
