# Supplementary material for: Study of 300,486 individuals identifies 148 independent genetic loci influencing general cognitive function
Source: Nat Commun. 2018 May 29;9:2098. doi: 10.1038/s41467-018-04362-x (PMC5974083; doi:10.1038/s41467-018-04362-x)
Supplement: Supplementary file 9 — Supplementary Data 6 [file 41467_2018_4362_MOESM9_ESM.xlsx]

## Sheet: Sheet1
Supplementary Data 6. Genome-wide significant (P < 2.75 x 10-6) gene based associations for CHARGE-COGENT and UK Biobank general cognitive function. Novel gene based associations are presented in bold.
Gene	Chromosome	Start	Stop	Number of SNPs	P
RNF123	3	49716932	49768962	129	7.034e-32
IP6K1	3	49751727	49833975	215	3.4788e-28
AMIGO3	3	49744267	49771349	74	1.1975e-26
GMPPB	3	49744277	49771384	74	1.1975e-26
TRAIP	3	49856034	49904007	98	1.128e-24
DCC	18	49856542	51067784	6449	1.2292e-24
CDHR4	3	49818165	49847268	75	3.1004e-24
MST1	3	49711380	49736934	50	4.7761e-23
UBA7	3	49832640	49861379	66	5.0334e-22
ATP2A1	16	28879726	28925830	133	5.0607e-22
FAM212A	3	49830687	49852463	51	5.72e-21
CAMKV	3	49885421	49917655	73	4.1489e-20
SH2B1	16	28847921	28895526	143	1.831e-19
BSN	3	49581922	49718978	311	2.5419e-19
NICN1	3	49450379	49476759	70	2.9298e-19
NEGR1	1	71851623	72758417	3049	9.0023e-19
GPX1	3	49384609	49406033	54	1.3233e-18
EXOC4	7	132927829	133761342	2582	2.4491e-18
ATXN2L	16	28824356	28858558	112	4.1742e-18
DAG1	3	49496146	49583048	210	1.4753e-17
RHOA	3	49386578	49460431	195	2.6471e-17
BTN1A1	6	26491449	26520650	124	3.4367e-17
AMT	3	49444211	49470186	57	4.3399e-17
TCF20	22	42546019	42749622	764	6.6992e-17
RABEP2	16	28905742	28957847	124	9.7702e-17
FOXP1	3	70993844	71643140	2237	9.8547e-17
GBF1	10	103995289	104152656	380	1.1118e-16
PTPRO	12	15465331	15760333	1133	1.74e-16
TUFM	16	28843732	28867729	69	2.1271e-16
TCTA	3	49439639	49463908	61	2.1313e-16
STAU1	20	47719878	47814904	327	2.1491e-16
ARFGEF2	20	47528427	47663230	506	3.6711e-16
TET2	4	106057032	106210973	577	4.4529e-16
CSE1L	20	47652849	47723489	267	6.3026e-16
TEX14	17	56624039	56779416	516	1.2558e-15
PPM1E	17	56823230	57068983	623	2.7716e-15
RNF43	17	56419861	56504956	252	2.961e-15
MEF2C	5	88003975	88209922	582	3.5112e-15
TRIM37	17	57049999	57194282	400	4.4289e-15
RBM6	3	49967440	50147478	462	5.2286e-15
RERG	12	15250717	15511609	838	5.9656e-15
CRHR1	17	43689267	43923194	1321	5.9984e-15
MST1R	3	49914435	49951299	73	7.0221e-15
APEH	3	49701435	49731396	63	9.8619e-15
SULT1A1	16	28606903	28644946	147	1.2574e-14
IST1	16	71869899	71972913	367	1.2909e-14
FOXO6	1	41817594	41859262	174	1.2924e-14
NT5DC2	3	52548386	52579070	119	1.6768e-14
PEF1	1	32085463	32120497	94	2.2618e-14
BTN2A1	6	26448150	26486849	201	2.2624e-14
MON1A	3	49936302	49977606	78	2.5617e-14
PRKAG1	12	49386057	49422980	66	3.243e-14
SEPT4	17	56587611	56628179	130	3.6695e-14
CCDC101	16	28555236	28613111	236	4.396e-14
PITX3	10	103979943	104011231	76	4.7392e-14
ABT1	6	26587180	26610278	105	4.955e-14
MGAT3	22	39843349	39898199	179	5.1725e-14
C17orf47	17	56608948	56631729	75	5.3039e-14
STAB1	3	52519354	52568511	190	5.3827e-14
KCNJ3	2	155544811	155724863	795	5.5696e-14
WBP2NL	22	42384729	42464460	265	5.7736e-14
IL27	16	28500683	28533372	90	5.9524e-14
GLT8D1	3	52718505	52750048	98	6.2604e-14
CLN3	16	28467983	28516896	74	6.8549e-14
HCRTR1	1	32073287	32108119	97	7.0121e-14
SULT1A2	16	28593264	28618430	104	7.4858e-14
DDN	12	49378932	49403092	54	8.5565e-14
NEK4	3	52734800	52814965	270	8.7809e-14
CLN3	16	28467974	28513333	62	9.3086e-14
SMIM4	3	52558029	52623253	243	1.0275e-13
ELOVL3	10	103976085	103999346	56	1.0375e-13
TMEM110-MUSTN1	3	52857137	52941578	290	1.1784e-13
BTN3A2	6	26355387	26388546	273	1.2907e-13
TRIM31	6	30060674	30090883	363	1.4586e-13
HMGN4	6	26528633	26556482	106	1.5442e-13
PSD	10	104152376	104191296	90	1.7199e-13
NFKB2	10	104143867	104172281	77	2.0042e-13
RBM5	3	50116341	50166454	101	2.0313e-13
EFTUD1	15	82412571	82565104	659	2.1364e-13
COL16A1	1	32107848	32179920	260	2.2031e-13
ST3GAL3	1	44161495	44406831	800	2.4249e-13
TMEM110	3	52860235	52941612	281	2.4541e-13
ZNF821	16	71883583	71939239	169	2.4643e-13
SND1	7	127282234	127742661	1347	2.5615e-13
APOBR	16	28495970	28520291	54	2.5888e-13
PBRM1	3	52569368	52729933	590	2.7412e-13
NMNAT2	1	183207372	183397737	772	2.7541e-13
HIST1H2BN	6	27796323	27833487	116	2.7981e-13
ATXN1L	16	71869894	71929171	185	2.8341e-13
HIST1H2AK	6	27795658	27816117	67	2.8809e-13
GNL3	3	52705172	52738508	100	2.8916e-13
SPCS1	3	52728971	52752182	73	2.9665e-13
POU6F2	7	39007598	39542694	2156	3.0661e-13
BAI1	8	143520791	143636370	474	3.3974e-13
ITIH4	3	52836991	52875495	182	4.4468e-13
AKTIP	16	53514952	53548323	125	4.5189e-13
MACROD2	20	13966015	16043842	9232	5.3025e-13
NPIPB7	16	28457693	28491868	16	5.4026e-13
CD19	16	28933260	28960667	66	5.4391e-13
SFMBT1	3	52927588	53090766	548	6.1088e-13
SEPT3	22	42362276	42404225	185	6.5757e-13
ATXN7L2	1	110016101	110045426	80	6.6988e-13
ELAVL2	9	23680102	23836335	755	7.6749e-13
ITIH1	3	52801603	52836078	149	7.7676e-13
KDM4A	1	44105829	44181186	208	7.9592e-13
PSMA5	1	109931653	109979062	121	8.0426e-13
KMT2D	12	49402758	49463557	112	8.1962e-13
MAPT	17	43961748	44115700	958	8.3348e-13
ZNF638	2	71493691	71672199	731	8.4752e-13
SKA2	17	57177312	57242630	146	8.7309e-13
PTPRF	1	43980858	44099343	468	8.7653e-13
ZSWIM6	5	60618100	60851997	633	9.1207e-13
SORT1	1	109842192	109950573	271	9.4077e-13
KANSL1	17	44097282	44312733	960	1.1538e-12
USP4	3	49305264	49388145	184	1.3739e-12
NPIPB8	16	28638975	28680003	42	1.5916e-12
CYP2D6	22	42512501	42536908	114	1.6508e-12
TEAD1	11	12685969	12976298	970	1.7778e-12
RBL2	16	53457889	53535561	260	1.7877e-12
RECQL4	8	145726667	145753229	102	1.7891e-12
QRICH1	3	49057140	49141796	173	1.9558e-12
MUSTN1	3	52857130	52879235	105	1.9582e-12
HIST1H2BL	6	27765257	27785709	73	2.17e-12
STH	17	44066616	44087060	138	2.36e-12
C10orf76	10	103595356	103825950	552	2.4834e-12
FOXO3	6	108871038	109015977	469	2.5214e-12
AUTS2	7	69053905	70268054	4061	2.5656e-12
FAM43B	1	20868932	20891512	122	2.7166e-12
SNX29	16	12060594	12678146	4171	2.717e-12
HIST1H2AI	6	27765899	27786429	74	2.8716e-12
PRKD1	14	30035687	30671104	2507	3.4625e-12
PLEKHM1	17	43503266	43578115	198	3.8428e-12
HIST1H3H	6	27767842	27788314	73	3.8568e-12
CYB561D1	1	110026674	110055554	93	4.0374e-12
ARHGAP27	17	43461275	43521787	228	4.0587e-12
UBE2E1	3	23837394	23942807	346	4.2136e-12
RAD51C	17	56759934	56821703	189	4.3318e-12
WNT3	17	44829872	44920520	275	4.3623e-12
MYBPHL	1	109824987	109859663	132	4.378e-12
SPPL2C	17	43912256	43934438	184	5.2117e-12
MUL1	1	20815943	20844654	117	6.5212e-12
MGEA5	10	103534200	103588696	126	6.8113e-12
SPNS1	16	28975542	29005869	87	6.8453e-12
HIST1H2BM	6	27772822	27793267	71	6.9596e-12
NSF	17	44658035	44844830	142	7.3038e-12
MFSD3	8	145724457	145746596	86	7.3438e-12
RTN1	14	60052694	60347684	948	7.5089e-12
HIST1H2AJ	6	27772112	27792607	70	7.7294e-12
GPT	8	145718356	145742557	96	7.7568e-12
RAI1	17	17574787	17724767	401	7.8293e-12
CPN1	10	101791950	101851634	254	8.1941e-12
LONRF2	2	100879753	100949195	383	8.5303e-12
NKIRAS1	3	23923151	23998082	324	8.8588e-12
ITIH3	3	52818784	52853025	166	9.2675e-12
KCNIP2	10	103575731	103613677	98	9.2862e-12
NFATC2IP	16	28952128	28988418	96	9.5905e-12
HIST1H4J	6	27781884	27802257	68	1.0674e-11
C3orf62	3	49296035	49325342	71	1.0898e-11
HIST1H2AL	6	27823034	27843606	85	1.1047e-11
PET112	4	152581656	152692175	385	1.1131e-11
HIST1H4K	6	27788952	27809305	59	1.1179e-11
LAT	16	28986147	29012104	80	1.1529e-11
SEMA3F	3	50182478	50236508	153	1.1621e-11
HIST1H4L	6	27830926	27851289	93	1.197e-11
PFDN1	5	139614624	139692706	203	1.3288e-11
HIST1H1B	6	27824570	27845359	89	1.4964e-11
SYPL2	1	109999180	110034759	122	1.5581e-11
PPP1R16A	8	145693352	145737504	164	1.594e-11
ZNF322	6	26626518	26669980	183	1.9972e-11
HIST1H3I	6	27829623	27850099	92	2.0465e-11
FOXH1	8	145688795	145711718	86	2.0475e-11
LRRC14	8	145733376	145760557	117	2.148e-11
NCKIPSD	3	48691364	48733797	95	2.2304e-11
RNF4	4	2453947	2637047	707	2.4098e-11
ARL17B	17	44342150	44449130	59	2.9005e-11
CSRNP3	2	166316157	166555917	735	4.0161e-11
SRPK2	7	104741151	105049755	996	4.0807e-11
SCAND1	20	34531539	34557394	99	4.6356e-11
TINAGL1	1	32032116	32063288	83	4.8686e-11
DNPH1	6	43183367	43207222	111	5.1006e-11
THRB	3	24148651	24546773	1780	5.2236e-11
IP6K2	3	48715436	48787786	167	5.3475e-11
DPP4	2	162838751	162941052	357	5.3929e-11
PGPEP1	19	18441397	18490760	211	5.8345e-11
BTN2A2	6	26373324	26405102	239	5.8741e-11
TNRC6A	16	24731016	24848953	426	5.9366e-11
SGCZ	8	13937373	15105848	9129	5.9976e-11
HBEGF	5	139702428	139736216	92	6.0312e-11
LSM4	19	18407040	18444084	146	6.056e-11
ERBB3	12	56463641	56507289	109	6.3928e-11
CYSTM1	5	139544227	139671637	363	7.0029e-11
RAB11FIP5	2	73290510	73393849	402	7.1658e-11
GATAD2B	1	153767201	153905451	396	8.5011e-11
CADM2	3	84998132	86133579	4686	9.8509e-11
RPL15	3	23948036	23975183	108	1.0319e-10
CUL9	6	43139913	43202325	194	1.1425e-10
NPIPB6	16	28343876	28384829	11	1.2326e-10
GADD45G	9	92209928	92231470	107	1.374e-10
SLC39A1	1	153921575	153950188	64	1.3895e-10
CALN1	7	71234476	71922136	3030	1.4184e-10
RHEBL1	12	49448468	49473808	41	1.4267e-10
CRTC2	1	153910145	153941101	72	1.4297e-10
LAMB2	3	49148547	49180551	71	1.4813e-10
NRL	14	24539316	24594223	143	1.5052e-10
ALMS1	2	73602886	73847920	790	1.5449e-10
MTMR4	17	56556898	56605266	134	1.625e-10
FBXL15	10	104168946	104192893	46	1.6527e-10
JMJD1C	10	64916981	65235722	1222	1.6827e-10
CNBD2	20	34546512	34628622	217	1.6837e-10
RAB5B	12	56357697	56398490	121	1.8631e-10
CAMK2N1	1	20798884	20822713	84	2.22e-10
BTN3A3	6	26430700	26463643	183	2.2226e-10
SPPL2A	15	50989506	51068005	359	2.6766e-10
SPAG4	20	34193814	34218971	71	2.6912e-10
SMG7	1	183431351	183577381	435	2.6954e-10
CPNE1	20	34203953	34262878	165	2.9205e-10
IL17D	13	21266266	21307237	180	2.9228e-10
CELSR3	3	48663902	48710348	97	3.3956e-10
CLCN2	3	184053973	184089439	132	3.3958e-10
RUNX1T1	8	92957203	93125514	379	3.4529e-10
CREB3L4	1	153930010	153956839	59	3.5418e-10
SHISA4	1	201847808	201871434	78	3.786e-10
CCDC36	3	49225861	49305537	171	3.9434e-10
PCK2	14	24553262	24589807	93	4.0584e-10
IMPDH2	3	49051758	49076841	51	4.0787e-10
N6AMT2	13	21292870	21358097	324	4.1647e-10
DHRS11	17	34938228	34967235	90	4.4048e-10
LRRC4	7	127657124	127682160	71	4.5273e-10
ARTN	1	44388992	44412913	88	4.6648e-10
EXT1	8	118796729	119134092	1275	4.8441e-10
AFF3	2	100152323	100769201	2092	5.0062e-10
NAGA	22	42444358	42476846	100	5.6718e-10
NUPR1	16	28538606	28560495	85	5.7716e-10
TAB1	22	39785746	39843065	185	6.2192e-10
PTPRT	20	40691392	41828610	5227	6.2296e-10
TNIP2	4	2733375	2768103	197	6.2305e-10
PLCL1	2	198659426	199447305	2570	6.2973e-10
RBM12	20	34226847	34262878	108	6.964e-10
SMYD5	2	73431350	73464365	115	7.0272e-10
RPS26	12	56425637	56448116	58	7.1433e-10
LRRC24	8	145737761	145762416	104	7.4592e-10
CACNA1I	22	39956758	40095742	529	7.8939e-10
ARID2	12	46113448	46311823	389	8.0115e-10
TSNARE1	8	143283441	143494601	1167	8.6234e-10
C8orf82	8	145741117	145764516	97	8.6726e-10
SLC26A6	3	48653156	48682926	81	8.8832e-10
AMIGO1	1	110036797	110062360	102	8.9941e-10
HSF5	17	56487528	56575745	226	9.1868e-10
PSMC3	11	47430320	47457993	112	9.2061e-10
NDUFA6	22	42471529	42496959	109	9.251e-10
SUOX	12	56380964	56410425	78	9.8944e-10
DALRD3	3	49042921	49069726	46	1.008e-09
SPI1	11	47366411	47410127	197	1.0175e-09
CDH9	5	26870709	27131257	961	1.0252e-09
NDUFAF2	5	60230956	60458853	748	1.028e-09
TRMT61A	14	103985521	104013410	131	1.0451e-09
KIFC2	8	145681426	145709585	123	1.0531e-09
ZSCAN9	6	28182664	28211260	126	1.0753e-09
IPO9	1	201788269	201863422	239	1.1115e-09
PHACTR3	20	58142564	58432766	1452	1.1403e-09
SMDT1	22	42465695	42490288	93	1.2106e-09
ZKSCAN4	6	28202401	28237011	128	1.226e-09
NCAM1	11	112821997	113159158	1560	1.3594e-09
FAM154B	15	82545151	82587271	142	1.4735e-09
JTB	1	153936745	153960164	45	1.5133e-09
LRRC37A	17	44360099	44425160	18	1.5286e-09
TLK2	17	60526019	60702842	414	1.5492e-09
ATXN1	6	16289343	16771722	2199	1.5539e-09
RBFOX1	16	6059095	7773340	15250	1.6295e-09
NFS1	20	34245977	34297281	177	1.6964e-09
PAX4	7	127240346	127265982	93	1.7033e-09
CEP57	11	95513129	95575857	306	1.7207e-09
EEA1	12	93154413	93333107	555	1.8922e-09
QARS	3	49123365	49152553	63	2.1456e-09
ZSCAN31	6	28282470	28334048	263	2.3084e-09
CDK2	12	56350553	56376568	71	2.3849e-09
AVL9	7	32525038	33088516	2233	2.4508e-09
IER5L	9	131927835	131950540	70	2.487e-09
TMEM160	19	47539165	47561888	78	2.5426e-09
FAM193A	4	2616988	2744292	570	2.544e-09
NPIPB9	16	28753108	28794128	3	2.6384e-09
SLC39A13	11	47418683	47448047	122	2.709e-09
NOTO	2	73419386	73449641	112	2.7568e-09
SUPT4H1	17	56412539	56440454	100	2.7757e-09
PRADC1	2	73445134	73470366	78	3.1025e-09
FAM109B	22	42460255	42485445	83	3.2576e-09
MED27	9	134725494	134965295	673	3.3057e-09
DENND4B	1	153891977	153929172	77	3.4261e-09
ARHGAP15	2	143838931	144535921	2458	3.4439e-09
SHISA9	16	12985477	13344272	2057	3.4696e-09
GGNBP2	17	34890737	34956278	182	3.6047e-09
SIX3	2	45158902	45183216	116	3.6308e-09
GOSR1	17	28794380	28864610	177	4.0351e-09
USP19	3	49135479	49168371	70	4.1054e-09
UBN1	16	4886666	4942361	304	4.1505e-09
SREBF1	17	17703713	17750325	132	4.3767e-09
MIEF1	22	39885437	39924137	107	4.4351e-09
IPO13	1	44402611	44443694	100	4.5553e-09
GKAP1	9	86344336	86454431	357	4.5864e-09
SPEG	2	220289568	220373009	273	4.6031e-09
CKB	14	103975996	103999448	107	5.2456e-09
MRM1	17	34948001	34975407	111	5.3918e-09
KLHDC8B	3	49199044	49223917	63	5.7086e-09
NKAPL	6	28217098	28238736	78	5.8155e-09
BRWD1	21	40546102	40703485	631	5.8288e-09
SYT1	12	79247773	79855788	2113	6.6551e-09
NOL12	22	38067680	38180137	456	7.1153e-09
HSPA9	5	137880571	137921133	114	7.2328e-09
NPM3	10	103531082	103553170	43	7.2677e-09
MYBPC3	11	47342957	47384253	161	7.3887e-09
RFTN2	2	198422948	198550769	347	7.5927e-09
ZFYVE9	1	52598046	52822358	642	7.7074e-09
LMF1	16	893634	1041318	1049	8.1637e-09
HIST1H4C	6	26094104	26114518	118	8.3935e-09
NUDT12	5	102874556	102908494	128	8.6901e-09
ATP6V0B	1	44430159	44453967	63	8.7539e-09
CORO1C	12	109028885	109135372	367	9.015e-09
SREBF2	22	42219109	42313312	326	9.1042e-09
POLR2H	3	184069506	184096384	88	9.2138e-09
AP1G1	16	71752913	71853104	392	9.2745e-09
AKAP6	14	32788479	33310567	2403	9.4274e-09
FAM76B	11	95492106	95533573	192	9.6917e-09
CPD	17	28695923	28807007	234	1.0156e-08
SHANK3	22	51102843	51181726	303	1.0184e-08
SAPCD1	6	31720576	31742628	101	1.0534e-08
HIST1H3B	6	26021817	26042288	108	1.0581e-08
NR1D2	3	23976751	24032109	234	1.0705e-08
MYO15A	17	18002020	18093116	326	1.082e-08
CACNA1E	1	181372238	181787219	1740	1.1181e-08
PHF20	20	34349896	34548303	728	1.1239e-08
ANKS1B	12	99110235	100388432	4951	1.1432e-08
IGF2BP1	17	47064774	47143012	211	1.1982e-08
MTMR2	11	95556046	95668479	436	1.2003e-08
CHUK	10	101938055	101999376	206	1.2119e-08
PGBD1	6	28239314	28280326	179	1.237e-08
ZNFX1	20	47844483	47904963	290	1.2755e-08
CNOT4	7	135036547	135204875	525	1.2842e-08
TESK2	1	45799555	45966872	440	1.2899e-08
BCL11A	2	60668302	60790702	344	1.29e-08
SRF	6	43129037	43159243	100	1.2909e-08
TOE1	1	45795342	45819647	64	1.3255e-08
TRIOBP	22	38083011	38182563	405	1.3509e-08
ARIH2	3	48946254	49033815	186	1.3574e-08
GNAT1	3	50219045	50243949	63	1.3899e-08
ETF1	5	137831784	137888989	169	1.4168e-08
MARK3	14	103841729	103980168	517	1.4289e-08
NRBF2	10	64883050	64924783	159	1.4576e-08
EP300	22	41477790	41586081	321	1.5062e-08
PLCB1	20	8102824	8959003	3795	1.5515e-08
ARIH2OS	3	48945221	48966818	55	1.5524e-08
MUTYH	1	45784835	45816142	75	1.5668e-08
TMIGD1	17	28633351	28671077	141	1.5866e-08
CENPW	6	126651320	126680021	60	1.5902e-08
NEU1	6	31815436	31840683	117	1.5936e-08
STRC	15	43881596	44020458	249	1.6039e-08
SLC39A8	4	103162198	103362415	895	1.7144e-08
NET1	10	5444514	5510426	220	1.7363e-08
DUSP11	2	73979311	74017284	70	1.7438e-08
PPA2	4	106280234	106405238	675	1.7624e-08
NUP160	11	47789639	47880107	353	1.7984e-08
EIF3C	16	28689879	28757051	8	1.844e-08
KLHL2	4	166118770	166254308	481	1.9077e-08
RBM39	20	34281531	34340234	230	1.9524e-08
HIST1H2AM	6	27850477	27870963	82	1.9717e-08
ROMO1	20	34277194	34298906	74	2.0327e-08
NDUFAF3	3	49047892	49070928	41	2.0355e-08
FSCN3	7	127221463	127252198	126	2.0749e-08
GCC1	7	127210672	127243665	116	2.2364e-08
SERF2	15	44059285	44104787	125	2.2421e-08
CCT7	2	73450548	73490149	137	2.2454e-08
CWF19L1	10	101982055	102037437	188	2.2562e-08
HIST1H1T	6	26097640	26118364	122	2.3108e-08
SLC44A4	6	31820969	31856823	155	2.4916e-08
CTPS1	1	41435007	41488235	210	2.4953e-08
CYHR1	8	145664965	145701060	173	2.5197e-08
ARHGEF11	1	156894632	157025162	436	2.5233e-08
NOVA1	14	26902299	27076960	548	2.578e-08
C3orf84	3	49205065	49239291	75	2.6383e-08
RALYL	8	85085022	85844079	2728	2.6438e-08
COG5	7	106832000	107214959	1260	2.6527e-08
BNC1	15	83914655	83963466	139	2.666e-08
CUEDC2	10	104173002	104202418	75	2.6969e-08
PSMG1	21	40536695	40565777	133	2.8279e-08
HIST1H3C	6	26035639	26056097	94	2.8596e-08
MSH5	6	31697725	31742622	201	2.8673e-08
MSH5-SAPCD1	6	31697797	31742628	201	2.8673e-08
DHH	12	49473204	49498602	68	2.9142e-08
CCDC71	3	49189968	49213754	52	2.9458e-08
BLOC1S2	10	102023713	102056469	113	2.9845e-08
SERINC4	15	44076360	44102419	68	3.0447e-08
HIST1H3J	6	27848093	27870884	90	3.0557e-08
ERLIN1	10	101899851	101958091	188	3.0652e-08
DPH2	1	44425672	44449041	56	3.1787e-08
SCN2A	2	166085912	166258818	695	3.1894e-08
FGF8	10	103519899	103545854	56	3.2967e-08
PMEL	12	56337889	56377101	106	3.4528e-08
ELL3	15	44054798	44079741	67	3.5084e-08
SLFNL1	1	41471269	41498909	118	3.5903e-08
PURG	8	30843321	30901231	188	3.6167e-08
EIF3CL	16	28380900	28425200	2	3.9257e-08
TENM4	11	78353876	79161992	3599	4.0633e-08
NRSN1	6	24116350	24165128	255	4.069e-08
MACROD1	11	63756030	63943578	669	4.0713e-08
PCDH17	13	58195944	58313445	392	4.0794e-08
PLCL2	3	16834159	17142086	1241	4.1993e-08
LRRC71	1	156880442	156912886	130	4.2387e-08
HPS6	10	103815147	103837792	53	4.3898e-08
ZNF131	5	43055278	43202123	622	4.4007e-08
H1F0	22	38191114	38213442	91	4.448e-08
FAM131A	3	184043714	184074063	127	4.5901e-08
ZNF318	6	43264872	43347216	228	4.6025e-08
NCOA2	8	71011997	71326040	852	4.6371e-08
LAMC2	1	183145373	183224035	381	4.6926e-08
PDIA3	15	44028590	44075477	120	4.803e-08
CC2D1B	1	52801395	52841865	115	4.8267e-08
TRIM10	6	30109722	30138711	336	4.8797e-08
CDKAL1	6	20524688	21242635	3232	4.9047e-08
RAPSN	11	47449308	47480730	127	4.9365e-08
DCDC2	6	24161984	24368280	1208	5.1418e-08
FNIP2	4	159680290	159839201	427	5.3304e-08
SOX11	2	5822799	5851516	97	5.649e-08
EHMT2	6	31837536	31875464	176	5.7099e-08
OR2J2	6	29131311	29152351	116	5.738e-08
SH3RF3	2	109735804	110272207	2084	5.7399e-08
SCMH1	1	41482872	41717826	809	5.7402e-08
SEH1L	18	12937132	12997535	232	5.8206e-08
HYPK	15	44078340	44105241	68	6.1073e-08
WRN	8	30881317	31041285	566	6.1596e-08
NPAS1	19	47513077	47559033	155	6.2592e-08
DDX27	20	47825884	47870614	190	6.3144e-08
ZMIZ2	7	44778180	44819477	132	6.3899e-08
PTK7	6	43034006	43139457	385	6.4371e-08
RCBTB1	13	50096082	50169719	440	6.4448e-08
MORC2	22	31311117	31374284	186	6.5057e-08
ZKSCAN8	6	28099688	28137250	191	6.5876e-08
YPEL4	11	57402560	57427417	66	7.1428e-08
PLTP	20	44517399	44550794	124	7.2661e-08
GCAT	22	38193912	38223183	110	7.3523e-08
CATSPER2	15	43910701	43970316	136	7.3739e-08
HIST1H2BO	6	27851203	27871669	79	7.5187e-08
PDE4D	5	58254865	59827947	5818	7.7963e-08
PPP2R4	9	131863229	131921225	262	7.8516e-08
RNF182	6	13914677	13990533	237	7.9134e-08
TTBK1	6	43201418	43265997	265	7.9847e-08
DERA	12	16054106	16200220	443	8.2287e-08
NCAPG	4	17802525	17856485	143	8.321e-08
CLP1	11	57406465	57439340	90	8.5284e-08
NKAIN2	6	124115286	125156803	4231	8.5597e-08
HIST1H4A	6	26011907	26032278	102	8.73e-08
LMOD1	1	201855580	201925715	251	8.749e-08
RABGAP1L	1	174118548	174974445	2696	9.5963e-08
CEP192	18	12981361	13135051	655	9.599e-08
VWA7	6	31723367	31755108	124	9.9836e-08
TMX2	11	57470072	57518445	120	1.0005e-07
ATG10	5	81257844	81582676	881	1.006e-07
HIST1H2BC	6	26105101	26134154	190	1.0093e-07
TMBIM6	12	50091508	50168717	352	1.0159e-07
ZNF311	6	28952562	28983093	142	1.0592e-07
HEXIM1	17	43214684	43239468	68	1.0695e-07
CACNA1D	3	53518683	53857760	1280	1.0866e-07
HBP1	7	106799406	106852974	165	1.0868e-07
CCDC134	22	42186683	42232303	149	1.091e-07
FLRT1	11	63860660	63896645	160	1.0997e-07
DCAF5	14	69507598	69629867	328	1.1061e-07
SYNGR1	22	39735930	39791593	245	1.1141e-07
ATF7IP	12	14508610	14661697	569	1.1288e-07
PTPRD	9	8304246	10622723	14697	1.1329e-07
ESRRG	1	216666588	217321097	3085	1.1389e-07
TM6SF1	15	83766159	83823606	148	1.1395e-07
PHGR1	15	40633234	40658635	102	1.1537e-07
ACOXL	2	111480150	111885799	1613	1.1623e-07
BOLL	2	198581603	198661486	170	1.1987e-07
SEMA3E	7	82983222	83288326	1377	1.2036e-07
AGAP1	2	236392733	237050444	2861	1.2053e-07
ARL6IP4	12	123454607	123477456	48	1.2455e-07
TYW5	2	200784698	200830459	139	1.2456e-07
NUP210L	1	153955161	154137592	406	1.2586e-07
WWP2	16	69786209	69985644	858	1.2668e-07
ARHGEF3	3	56751446	57123357	1606	1.2716e-07
HIST1H2AB	6	26023320	26043796	101	1.2801e-07
MRC2	17	60694762	60780958	265	1.3101e-07
SLC25A20	3	48884369	48946426	131	1.3326e-07
C11orf31	11	57498825	57520986	51	1.3345e-07
OGFOD2	12	123449127	123474590	57	1.3746e-07
SYT7	11	61272785	61358620	300	1.4209e-07
SMIM15	5	60443536	60468301	68	1.4392e-07
TTC29	4	147617790	147877034	906	1.5559e-07
OR12D3	6	29331200	29353068	141	1.5819e-07
KIAA0319	6	24534332	24656383	654	1.6151e-07
GABRA4	4	46910917	47006424	442	1.6241e-07
SCG3	15	51963550	52023223	231	1.6245e-07
APBA1	9	72032446	72297222	885	1.6735e-07
TMX2-CTNND1	11	57470077	57569058	251	1.7289e-07
MARVELD3	16	71650064	71686017	127	1.7344e-07
LCORL	4	17832822	18033499	708	1.7609e-07
ZNF165	6	28038753	28067341	131	1.7947e-07
CDH8	16	61671146	62080939	1509	1.8295e-07
ROPN1	3	123677368	123721025	163	1.8372e-07
PALM	19	698953	758329	387	1.8485e-07
ERCC8	5	60159658	60250900	325	1.8753e-07
SSTR4	20	23006057	23027314	115	1.8836e-07
CTNND1	11	57510715	57597018	202	1.8863e-07
HIST1H2BB	6	26033455	26053885	101	1.8905e-07
RAB11A	15	66008392	66194329	584	1.9326e-07
DISP2	15	40640436	40673257	124	1.9346e-07
DPYD	1	97533299	98396605	3296	1.9628e-07
SBK1	16	28293840	28345170	130	1.9825e-07
ZNF800	7	126976844	127081978	428	2.0262e-07
FBXO41	2	73471810	73521559	141	2.0474e-07
BLMH	17	28565218	28629074	172	2.0512e-07
HABP4	9	99202483	99263618	194	2.0558e-07
ASIC4	2	220368892	220413494	166	2.1048e-07
ELOVL7	5	60037618	60150216	411	2.1218e-07
CD46	1	207915402	207978858	231	2.1244e-07
C20orf173	20	34101014	34127481	74	2.1496e-07
HIST1H3A	6	26010718	26031186	96	2.1649e-07
MFAP1	15	44086690	44127000	108	2.1699e-07
TBRG1	11	124482732	124515287	104	2.1733e-07
ARSI	5	149665906	149728870	240	2.2505e-07
SLC6A4	17	28511337	28573020	172	2.2708e-07
BAIAP2	17	78998948	79101232	678	2.3795e-07
PHF2	9	96328689	96451869	687	2.4558e-07
CDH2	18	25520930	25767410	819	2.4781e-07
PAPOLG	2	60973365	61039220	228	2.5005e-07
GRK6	5	176820205	176879902	166	2.508e-07
ZSCAN16	6	28082338	28107860	111	2.5248e-07
PRKAR2A	3	48772030	48895279	210	2.543e-07
GRIA4	11	105470721	105862819	1307	2.5573e-07
C6orf100	6	28901654	28922314	148	2.5727e-07
CEP250	20	34032985	34109804	225	2.5942e-07
ARF5	7	127218399	127241759	92	2.6269e-07
C2orf69	2	200765979	200830658	200	2.6691e-07
DTNBP1	6	15513032	15673289	621	2.7079e-07
PITPNM2	12	123458027	123644562	462	2.8003e-07
SMAP1	6	71367479	71581718	699	2.8047e-07
PLEKHG7	12	93105281	93176231	239	2.8208e-07
VAC14	16	70711342	70845064	583	2.8309e-07
ORC1	1	52828501	52880131	126	2.9592e-07
GPR22	7	107100463	107126098	72	3.0288e-07
TRIM27	6	28860779	28901766	233	3.111e-07
ZNF335	20	44567292	44610833	181	3.1716e-07
TBR1	2	162262605	162292381	87	3.1885e-07
PPIP5K1	15	43815660	43892430	116	3.2323e-07
STAG1	3	136045077	136481220	1181	3.2649e-07
THBD	20	23016270	23040378	112	3.3101e-07
EPHA5	4	66175281	66546213	1855	3.361e-07
DCP1A	3	53307447	53391654	225	3.3774e-07
CDH7	18	63407488	63558638	657	3.3926e-07
XPO4	13	21341469	21487187	593	3.4755e-07
TRIM40	6	30093885	30126512	450	3.4913e-07
HEXIM2	17	43228067	43257407	80	3.5445e-07
TPRKB	2	73946231	73974527	70	3.5612e-07
EFNA5	5	106702590	107016596	1224	3.5613e-07
LARGE	22	33548212	34328829	4181	3.6249e-07
ZDHHC5	11	57425219	57478659	145	3.6277e-07
WDR76	15	44109161	44170617	181	3.628e-07
C9orf64	9	86543226	86581901	128	3.6571e-07
CKMT1A	15	43975084	44001420	36	3.6789e-07
HMGN1	21	40704241	40731573	118	3.6939e-07
NDST3	4	118944773	119189803	1039	3.7075e-07
FANK1	10	127575108	127708161	447	3.7122e-07
BTBD18	11	57500986	57529253	72	3.8276e-07
DCAF16	4	17792278	17822381	82	3.8965e-07
OR5V1	6	29313007	29409744	826	3.8978e-07
CRIM1	2	36573069	36788278	888	3.9188e-07
C2orf47	2	200810040	200883263	218	3.9438e-07
RSPO1	1	38066951	38110595	171	3.9994e-07
VWA5A	11	123976069	124028428	225	4.0304e-07
DRG2	17	17981200	18021285	138	4.0323e-07
RPP21	6	30302908	30324661	118	4.1419e-07
PTPLB	3	123199667	123314032	455	4.2247e-07
TUBAL3	10	5425061	5456793	168	4.2542e-07
SCAF11	12	46302914	46395903	225	4.3999e-07
GMPPA	2	220353589	220381710	101	4.5637e-07
CHST10	2	100998327	101044118	245	4.5658e-07
MAST4	5	65882176	66475423	2551	4.653e-07
BTBD1	15	83675174	83746106	252	5.0642e-07
IKZF4	12	56391443	56442219	117	5.0702e-07
TBC1D29	17	28874130	28900511	87	5.0893e-07
ERGIC3	20	34119770	34155405	108	5.1159e-07
DCAF11	14	24573404	24604451	78	5.1284e-07
ABCC2	10	101532489	101621949	311	5.2417e-07
RAB13	1	153944127	153968834	39	5.2777e-07
VAMP2	17	8052467	8076864	85	5.4597e-07
IQCK	16	19717778	19878907	598	5.4608e-07
GPR26	10	125415871	125464123	240	5.6279e-07
KCNJ6	21	38969678	39298749	1518	5.6331e-07
SLC22A7	6	43253432	43283276	84	5.6852e-07
B4GALT2	1	44434615	44466840	97	5.7568e-07
GPD2	2	157281802	157480247	637	5.7853e-07
TOM1L2	17	17736828	17885736	447	6.1353e-07
CRIP3	6	43257448	43286535	81	6.1536e-07
TRAM1	8	71475677	71530622	172	6.2533e-07
HDGFRP3	15	83774320	83886770	339	6.4525e-07
RBMS1	2	161118662	161360305	830	6.4734e-07
HIST1H4B	6	26017124	26037480	109	6.6934e-07
ATF4	22	39905700	39928691	63	6.8155e-07
DBN1	5	176873609	176911402	103	6.8489e-07
ZKSCAN3	6	28307691	28346947	207	7.0201e-07
KDM4C	9	6710863	7185648	2920	7.1688e-07
TMEM89	3	48648192	48669288	63	7.1702e-07
ZBTB37	1	173827220	173882687	205	7.4689e-07
RILPL2	12	123889936	123931264	139	7.4759e-07
AP3B2	15	83318033	83388666	280	7.4768e-07
USP34	2	61404598	61707904	1093	7.4844e-07
CTNNA2	2	79402357	80885905	6824	7.5898e-07
ATP6AP1L	5	81565281	81692796	458	7.8773e-07
HHLA2	3	108005376	108107132	473	7.9904e-07
RPRML	17	45045523	45066614	119	8.0429e-07
BCL2L12	19	50158823	50187173	75	8.0479e-07
CASC5	15	40876218	40966540	280	8.1189e-07
ZNF777	7	149118454	149168214	174	8.1394e-07
SLC26A1	4	962861	997228	159	8.1752e-07
GBE1	3	81528850	81821312	911	8.4137e-07
KLC1	14	104018233	104177888	589	8.4484e-07
TTC39A	1	51742930	51820788	305	8.4744e-07
FNBP4	11	47728072	47798995	293	8.6949e-07
RMDN3	15	41018082	41058049	126	9.2929e-07
NEDD8-MDP1	14	24673161	24711558	97	9.783e-07
HIST1H2BD	6	26148349	26181577	106	9.9028e-07
PRR7	5	176863446	176893283	79	1.0087e-06
LARP7	4	113548120	113588748	133	1.0322e-06
HLA-B	6	31311649	31334965	752	1.0384e-06
GRM3	7	86263230	86504200	767	1.0474e-06
PABPN1	14	23780498	23805394	76	1.0723e-06
TULP4	6	158723692	158942860	1015	1.0805e-06
ARL11	13	50192435	50218008	117	1.115e-06
CDH4	20	59817482	60525673	4305	1.1287e-06
RIMS2	8	104502976	105278322	3431	1.1372e-06
REEP3	10	65271123	65394883	475	1.1375e-06
FLOT2	17	27196353	27234697	99	1.1463e-06
RPS6KB1	17	57960447	58037925	201	1.1622e-06
CLIC1	6	31688358	31717540	117	1.1747e-06
FAM160A1	4	152320368	152594784	859	1.1813e-06
NTNG2	9	135027334	135129921	440	1.1835e-06
L3MBTL2	22	41591209	41637275	197	1.1934e-06
ZMAT2	5	140068265	140096248	94	1.2052e-06
COL7A1	3	48591506	48642700	116	1.2233e-06
NEDD8	14	24676058	24711660	88	1.2241e-06
APOPT1	14	104019299	104083860	240	1.2274e-06
HIST1H1A	6	26007260	26028040	98	1.2344e-06
ERAP2	5	96201643	96265420	370	1.2503e-06
MED19	11	57461186	57489693	79	1.2668e-06
AURKB	17	8098056	8123918	97	1.2766e-06
UQCRC1	3	48626435	48658409	69	1.279e-06
OR8B3	11	124256278	124277264	67	1.285e-06
USP10	16	84723584	84823528	618	1.2947e-06
ZBTB12	6	31857384	31879769	90	1.3071e-06
ACBD4	17	43199967	43231548	105	1.3137e-06
CRAT	9	131847089	131883468	139	1.3316e-06
VEGFA	6	43727921	43764224	143	1.3388e-06
HARS2	5	140061011	140088889	99	1.3569e-06
IGSF9B	11	133768459	133836880	344	1.3615e-06
GPR52	1	174407212	174428683	68	1.4045e-06
CENPM	22	42324725	42353168	125	1.422e-06
MYLK	3	123318896	123613178	1076	1.4268e-06
FADD	11	70039269	70063496	106	1.4511e-06
TRIM38	6	25953030	25997384	214	1.459e-06
C6orf15	6	31069000	31090336	325	1.4929e-06
LRPPRC	2	44103647	44233144	580	1.5193e-06
EPHB1	3	134306643	134989309	2923	1.5372e-06
ZNHIT3	17	34832473	34865154	97	1.5542e-06
VPS41	7	38752563	38981994	1063	1.6057e-06
LACTB2	8	71537553	71591409	221	1.6108e-06
MAP9	4	156253810	156308122	266	1.6206e-06
ZSCAN12	6	28336732	28377511	204	1.6311e-06
AGBL2	11	47671143	47746941	259	1.6716e-06
KCNK3	2	26905619	26966288	211	1.6743e-06
SMIM23	5	171202876	171231602	153	1.7039e-06
RPS19BP1	22	39915098	39938860	86	1.7166e-06
MOB4	2	198370295	198428423	151	1.7217e-06
PRR15L	17	46019333	46045244	100	1.755e-06
CPA6	8	68324360	68668620	1407	1.7965e-06
RALA	7	39653082	39757723	319	1.8257e-06
SOBP	6	107801162	107991357	614	1.8623e-06
CKAP4	12	106621655	106708057	377	1.8968e-06
GNL2	1	38022417	38071536	185	1.9053e-06
BMPR2	2	203231659	203442474	585	1.913e-06
C2orf78	2	74001316	74054274	56	1.9538e-06
THPO	3	184079723	184105932	86	1.9596e-06
LHX8	1	75584119	75637218	168	1.9877e-06
CHMP4A	14	24668789	24693075	74	2.0006e-06
MCRS1	12	49940327	49971936	92	2.0102e-06
WDR66	12	122345768	122451833	390	2.0426e-06
HIST1H2AC	6	26114373	26149344	198	2.0548e-06
DENND4A	15	65940384	66094631	444	2.0555e-06
PKD2L1	10	102037903	102100243	251	2.1246e-06
PRPF40B	12	49952001	50048449	274	2.1481e-06
CALU	7	128369346	128421861	201	2.1913e-06
TMEM173	5	138845119	138872520	78	2.2362e-06
PPP2R3A	3	135674515	135876733	564	2.2481e-06
NME9	3	137970279	138058728	183	2.278e-06
DCP2	5	112302399	112366667	297	2.3196e-06
GPM6A	4	176544085	176933815	1846	2.3887e-06
C1QTNF4	11	47601216	47626211	83	2.396e-06
KCNH7	2	163217917	163705240	1621	2.4096e-06
CCDC14	3	123606152	123690564	306	2.4192e-06
HARS	5	140042758	140081609	133	2.4304e-06
CD83	6	14107872	14147149	159	2.4861e-06
VARS	6	31735295	31773730	144	2.5059e-06
C20orf201	20	62704733	62725712	65	2.5065e-06
TUBD1	17	57926851	57980304	181	2.5525e-06
IRF3	19	50152826	50179132	67	2.5747e-06
SLC4A10	2	162270843	162851792	1897	2.5874e-06
XKR9	8	71571600	71712606	599	2.5923e-06
PPP1CC	12	111147485	111190744	152	2.6442e-06
TCP11L2	12	106685707	106750793	229	2.6474e-06
HYI	1	43906824	43929660	68	2.6742e-06
OPN1SW	7	128402545	128425844	96	2.6956e-06
