# Supplementary material for: Study of 300,486 individuals identifies 148 independent genetic loci influencing general cognitive function
Source: Nat Commun. 2018 May 29;9:2098. doi: 10.1038/s41467-018-04362-x (PMC5974083; doi:10.1038/s41467-018-04362-x)
Supplement: Supplementary file 10 — Supplementary Data 7 [file 41467_2018_4362_MOESM10_ESM.xlsx]

## Sheet: Sheet1
Supplementary Data 7. MAGMA gene-set analysis for general cognitive function. Gene-sets that withstood Bonferroni correction (α=0.05/10894) are highlighted in bold. Abbreviations: GO, Gene ontology; bp, biological processes; cc, cellular components; mf, molecular functions.
Gene-set Name	Number of genes	Beta	SE	P
GO bp:go neurogenesis	1355	0.2	0.0338	1.5709e-09
GO bp:go regulation of nervous system development	722	0.218	0.0452	7.52e-07
GO cc:go neuron projection	900	0.2	0.0417	7.8876e-07
GO bp:go positive regulation of nervous system development	419	0.281	0.0589	9.4191e-07
GO bp:go neuron differentiation	842	0.198	0.0426	1.6778e-06
GO bp:go regulation of cell development	808	0.196	0.0424	1.9304e-06
GO cc:go dendrite	430	0.266	0.0592	3.5244e-06
GO bp:go central nervous system neuron differentiation	160	0.452	0.102	4.629e-06
GO cc:go inhibitory synapse	11	1.94	0.447	6.7606e-06
GO bp:go positive regulation of cell development	457	0.243	0.0563	8.1178e-06
GO bp:go positive regulation of creb transcription factor activity	14	1.43	0.333	8.9452e-06
Curated gene sets:roversi glioma copy number up	98	0.664	0.158	1.2851e-05
GO bp:go chromatin modification	495	0.218	0.0525	1.6518e-05
Curated gene sets:myllykangas amplification hot spot 16	9	1.8	0.438	1.9288e-05
GO bp:go chromatin organization	598	0.202	0.0496	2.3448e-05
GO mf:go protein phosphatase binding	118	0.439	0.109	3.0163e-05
GO bp:go chromosome organization	927	0.157	0.0392	3.024e-05
GO bp:go neuron projection morphogenesis	386	0.243	0.0621	4.5673e-05
GO bp:go regulation of neuron differentiation	532	0.206	0.0528	4.7613e-05
GO bp:go positive regulation of dendritic spine development	31	0.899	0.231	4.891e-05
GO bp:go central nervous system development	828	0.165	0.0426	5.3667e-05
GO bp:go head development	673	0.18	0.0467	5.7865e-05
GO cc:go somatodendritic compartment	621	0.188	0.0491	6.3521e-05
GO bp:go adherens junction organization	69	0.562	0.149	8.0044e-05
GO cc:go neuron spine	116	0.424	0.113	8.2486e-05
GO bp:go regulation of synapse organization	105	0.453	0.121	9.1354e-05
GO cc:go early endosome membrane	107	0.426	0.114	9.4448e-05
GO bp:go neural precursor cell proliferation	68	0.536	0.145	0.00010467
GO bp:go regulation of alpha amino 3 hydroxy 5 methyl 4 isoxazole propionate selective glutamate receptor activity	18	1.15	0.31	0.00010649
GO bp:go positive regulation of neuron differentiation	294	0.259	0.0708	0.00012474
Curated gene sets:blalock alzheimers disease dn	1161	0.127	0.0348	0.00013006
GO bp:go regulation of neuron projection development	388	0.225	0.0619	0.00013759
Curated gene sets:gobert oligodendrocyte differentiation dn	1038	0.138	0.0381	0.00014758
GO bp:go regulation of synapse structure or activity	222	0.289	0.0806	0.000166
Curated gene sets:reactome adherens junctions interactions	27	0.887	0.249	0.00018661
GO bp:go cell morphogenesis involved in neuron differentiation	354	0.226	0.0647	0.00023771
GO bp:go cell cycle checkpoint	190	0.283	0.0814	0.000255
GO cc:go neuron part	1205	0.125	0.0361	0.00025943
GO bp:go cerebral cortex neuron differentiation	20	0.938	0.272	0.00028181
Curated gene sets:martoriati mdm4 targets neuroepithelium dn	156	0.328	0.095	0.00028253
GO bp:go gabaergic neuron differentiation	14	1.19	0.347	0.00029271
GO bp:go positive regulation of neuron projection development	221	0.284	0.0826	0.00029687
GO bp:go telencephalon development	220	0.287	0.0837	0.00029936
Curated gene sets:verhaak glioblastoma proneural	158	0.324	0.0951	0.00032373
GO bp:go neuron migration	105	0.402	0.119	0.00035428
GO mf:go translation regulator activity	33	0.756	0.224	0.000368
GO bp:go insulin like growth factor receptor signaling pathway	14	1.11	0.33	0.00037445
GO bp:go macromolecule methylation	194	0.273	0.0813	0.00040038
GO mf:go histone demethylase activity	20	0.802	0.24	0.00042588
GO bp:go regulation of cell differentiation	1436	0.109	0.0326	0.00043415
GO cc:go transport vesicle membrane	143	0.326	0.0979	0.00044073
GO bp:go neuron development	662	0.158	0.0476	0.00045334
GO cc:go postsynapse	355	0.216	0.0652	0.00045409
GO cc:go synapse part	580	0.168	0.0507	0.00047442
GO bp:go positive regulation of dendrite development	57	0.545	0.165	0.00049187
GO cc:go chromosome	839	0.136	0.0412	0.00049917
GO cc:go chromosomal region	319	0.208	0.0633	0.00050065
Curated gene sets:reactome gaba a receptor activation	10	1.59	0.483	0.00051116
GO bp:go cerebellar cortex formation	21	0.904	0.275	0.00051446
GO bp:go positive regulation of p38mapk cascade	14	1.08	0.33	0.00051635
GO bp:go vocalization behavior	10	1.28	0.392	0.0005341
GO bp:go postsynaptic membrane organization	24	0.788	0.242	0.00056687
GO bp:go regulation of dendrite development	111	0.385	0.119	0.0005927
GO bp:go synapse organization	131	0.35	0.108	0.0005987
GO bp:go neuronal stem cell population maintenance	19	0.893	0.276	0.00060027
GO bp:go regulation of cell morphogenesis involved in differentiation	320	0.219	0.0675	0.00060625
GO bp:go protein dealkylation	23	0.723	0.223	0.00060739
GO bp:go protein demethylation	23	0.723	0.223	0.00060739
GO bp:go regulation of dendritic spine development	51	0.561	0.176	0.00071263
Curated gene sets:sesto response to uv c2	51	0.536	0.168	0.00073996
GO cc:go synapse	718	0.145	0.0457	0.0007683
GO bp:go cerebral cortex gabaergic interneuron differentiation	11	1.23	0.388	0.00079224
GO mf:go core promoter sequence specific dna binding	99	0.373	0.119	0.00086288
GO mf:go phosphatase binding	160	0.289	0.0929	0.00093352
GO cc:go transporter complex	305	0.22	0.0708	0.00094495
Curated gene sets:markey rb1 chronic lof up	110	0.334	0.108	0.00096863
GO bp:go positive regulation of viral genome replication	29	0.628	0.203	0.00097418
GO cc:go synaptic membrane	242	0.249	0.0809	0.001051
GO bp:go positive regulation of myoblast differentiation	22	0.852	0.278	0.0010756
GO bp:go regulation of long term synaptic potentiation	18	0.901	0.294	0.0010833
GO bp:go positive regulation of long term synaptic potentiation	14	1.03	0.338	0.0011443
GO bp:go neuron projection development	522	0.163	0.0535	0.0011694
GO bp:go positive regulation of cell differentiation	795	0.13	0.0429	0.0011733
GO bp:go rhythmic process	287	0.209	0.0686	0.0011888
Curated gene sets:reactome mitotic m m g1 phases	163	0.255	0.0838	0.0011916
GO cc:go kinetochore	113	0.317	0.105	0.0013393
GO bp:go positive regulation of calcium ion dependent exocytosis	25	0.728	0.242	0.0013421
GO bp:go regulation of neurotransmitter receptor activity	29	0.707	0.236	0.0013746
GO cc:go excitatory synapse	185	0.273	0.0913	0.0014201
Curated gene sets:bild e2f3 oncogenic signature	233	0.222	0.0744	0.0014361
GO cc:go nuclear chromosome	497	0.16	0.0537	0.0014821
GO cc:go presynaptic membrane	54	0.519	0.175	0.0015442
Curated gene sets:collis prkdc substrates	19	0.795	0.269	0.0015518
Curated gene sets:teramoto opn targets cluster 5	7	1.16	0.394	0.0016324
GO bp:go positive regulation of cell projection organization	289	0.207	0.0705	0.0016429
GO cc:go ribonucleoprotein granule	143	0.28	0.0953	0.0016436
GO cc:go axon	404	0.178	0.0606	0.0016855
GO mf:go nucleic acid binding transcription factor activity	1134	0.111	0.0381	0.0017433
GO bp:go sister chromatid cohesion	104	0.308	0.106	0.001766
Curated gene sets:meissner npc hcp with h3k4me2 and h3k27me3	346	0.188	0.0645	0.0017675
GO bp:go regulation of neural precursor cell proliferation	73	0.376	0.129	0.0018421
GO cc:go condensed chromosome centromeric region	96	0.33	0.114	0.0018443
GO bp:go attachment of spindle microtubules to kinetochore	14	0.985	0.34	0.0018793
Curated gene sets:rashi response to ionizing radiation 3	45	0.528	0.182	0.001895
GO bp:go protein methylation	113	0.304	0.105	0.0019233
GO bp:go protein alkylation	113	0.304	0.105	0.0019233
GO bp:go hindbrain development	133	0.291	0.101	0.0020219
GO bp:go behavior	498	0.155	0.0539	0.0020258
GO bp:go positive regulation of developmental process	1099	0.105	0.0367	0.0020289
Curated gene sets:reactome mitotic prometaphase	82	0.329	0.115	0.0020907
GO mf:go core promoter binding	145	0.278	0.0976	0.0021725
GO bp:go regulation of adherens junction organization	48	0.461	0.162	0.0021942
GO bp:go regulation of cell morphogenesis	529	0.151	0.0531	0.0022023
GO bp:go positive regulation of cell morphogenesis involved in differentiation	154	0.283	0.0994	0.002224
Curated gene sets:browne hcmv infection 30min dn	143	0.28	0.0986	0.0022601
GO bp:go positive regulation of developmental growth	150	0.276	0.0971	0.0022732
Curated gene sets:pujana atm pcc network	1342	0.0917	0.0325	0.0024126
GO bp:go negative regulation of nitrogen compound metabolic process	1426	0.0927	0.0329	0.0024147
Curated gene sets:mikkelsen dedifferentiated state dn	7	1.38	0.49	0.0024672
Curated gene sets:reactome dna replication	183	0.221	0.0789	0.0024971
GO bp:go positive regulation of synapse assembly	54	0.476	0.17	0.0025427
GO bp:go regulation of substrate adhesion dependent cell spreading	42	0.486	0.174	0.0025478
GO bp:go cell part morphogenesis	608	0.136	0.0486	0.002576
GO mf:go protein phosphatase 1 binding	20	0.735	0.263	0.0026091
GO cc:go dendrite membrane	20	0.832	0.298	0.0026371
Curated gene sets:reactome cell cell junction organization	55	0.469	0.168	0.0026552
GO bp:go regulation of cell projection organization	536	0.146	0.0525	0.0026558
GO bp:go peptidyl lysine modification	291	0.185	0.0673	0.0029514
GO bp:go regulation of collateral sprouting	17	0.832	0.302	0.002958
GO mf:go voltage gated cation channel activity	127	0.289	0.105	0.0029702
GO bp:go wnt signaling pathway	341	0.178	0.0647	0.0029765
GO bp:go peptidyl lysine methylation	71	0.367	0.134	0.0030128
Curated gene sets:guo hex targets up	76	0.354	0.129	0.0030388
GO mf:go cadherin binding	28	0.603	0.22	0.003047
GO bp:go spinal cord association neuron differentiation	14	0.937	0.342	0.0031133
Curated gene sets:mellman tut1 targets up	18	0.697	0.255	0.0031411
GO bp:go non canonical wnt signaling pathway	139	0.271	0.0991	0.0031719
GO bp:go regulation of multicellular organismal development	1607	0.0846	0.031	0.0031817
GO mf:go rna binding	1503	0.0827	0.0304	0.0032343
Curated gene sets:maclachlan brca1 targets dn	15	0.788	0.29	0.0032905
GO bp:go forebrain generation of neurons	61	0.441	0.162	0.0033053
Curated gene sets:biocarta sars pathway	10	1.16	0.426	0.0033184
GO bp:go regulation of cell matrix adhesion	87	0.333	0.123	0.0033394
GO bp:go positive regulation of cholesterol efflux	14	0.836	0.308	0.0033397
Curated gene sets:benporath es with h3k27me3	1051	0.108	0.0397	0.0033441
Curated gene sets:reactome cell cycle	390	0.156	0.0577	0.0033717
GO bp:go covalent chromatin modification	310	0.175	0.0647	0.0033989
GO mf:go gtp dependent protein binding	17	0.79	0.292	0.0034028
GO bp:go positive regulation of substrate adhesion dependent cell spreading	27	0.59	0.218	0.0034046
GO bp:go histone methylation	80	0.343	0.127	0.0035491
GO mf:go gamma tubulin binding	23	0.705	0.262	0.0035744
GO bp:go metencephalon development	96	0.311	0.116	0.0036038
Curated gene sets:ginestier breast cancer 20q13 amplification dn	158	0.237	0.0881	0.0036217
Curated gene sets:kegg colorectal cancer	62	0.423	0.158	0.0036951
GO bp:go wnt signaling pathway calcium modulating pathway	39	0.524	0.196	0.0037394
GO bp:go regulation of myoblast differentiation	46	0.494	0.186	0.0039173
Curated gene sets:fardin hypoxia 9	7	1.31	0.494	0.0039374
GO bp:go positive regulation of dephosphorylation	44	0.487	0.183	0.0039504
GO mf:go gamma catenin binding	12	0.934	0.352	0.0039701
Curated gene sets:mikkelsen es hcp with h3k27me3	40	0.579	0.218	0.0039764
GO bp:go regulation of lipoprotein lipase activity	15	0.824	0.31	0.0039765
GO bp:go cellular glucose homeostasis	74	0.35	0.132	0.0039853
GO cc:go histone methyltransferase complex	65	0.356	0.134	0.0040221
GO bp:go cellular response to fluid shear stress	19	0.737	0.279	0.0040908
GO bp:go positive regulation of dendrite morphogenesis	27	0.681	0.258	0.0041136
GO bp:go establishment of mitochondrion localization	15	0.872	0.33	0.0041718
GO bp:go positive regulation of sterol transport	17	0.716	0.272	0.0042529
GO bp:go positive regulation of cholesterol transport	17	0.716	0.272	0.0042529
GO bp:go serotonin receptor signaling pathway	17	0.79	0.302	0.0044762
GO mf:go serotonin receptor activity	17	0.79	0.302	0.0044762
GO bp:go negative regulation of protein activation cascade	10	1.05	0.404	0.0045526
GO bp:go ectodermal placode development	14	0.915	0.351	0.0045637
GO bp:go ectodermal placode morphogenesis	14	0.915	0.351	0.0045637
GO bp:go ectodermal placode formation	14	0.915	0.351	0.0045637
GO bp:go feeding behavior	85	0.336	0.129	0.0046971
GO cc:go condensed chromosome	185	0.214	0.0827	0.0047533
GO mf:go mrna binding	145	0.244	0.0943	0.0048686
Curated gene sets:biocarta p53hypoxia pathway	21	0.61	0.236	0.0048879
Curated gene sets:magrangeas multiple myeloma igll vs iglk dn	23	0.712	0.276	0.0049018
GO bp:go cellular response to cholesterol	12	0.903	0.35	0.0049655
GO bp:go cellular response to sterol	15	0.816	0.317	0.0049836
Curated gene sets:sig insulin receptor pathway in cardiac myocytes	49	0.428	0.166	0.0050076
Curated gene sets:whitfield cell cycle m g1	140	0.255	0.099	0.0050769
GO bp:go homophilic cell adhesion via plasma membrane adhesion molecules	145	0.312	0.121	0.0050868
GO bp:go regulation of potassium ion transmembrane transporter activity	40	0.505	0.197	0.0051616
GO bp:go focal adhesion assembly	22	0.656	0.256	0.005234
GO bp:go cell substrate adherens junction assembly	22	0.656	0.256	0.005234
GO cc:go ionotropic glutamate receptor complex	44	0.483	0.189	0.0053109
GO bp:go methylation	266	0.177	0.0694	0.0053486
GO bp:go regulation of chromosome organization	263	0.18	0.0707	0.0053649
GO bp:go regulation of potassium ion transport	81	0.363	0.142	0.0053747
GO bp:go demethylation	46	0.428	0.168	0.0053905
GO bp:go protein localization to chromosome centromeric region	13	0.73	0.286	0.0054041
GO bp:go pallium development	146	0.259	0.102	0.0054449
GO mf:go demethylase activity	28	0.549	0.216	0.0055392
GO mf:go s adenosylmethionine dependent methyltransferase activity	134	0.252	0.0996	0.0057554
GO bp:go positive regulation of adherens junction organization	21	0.592	0.235	0.0057744
GO bp:go central nervous system projection neuron axonogenesis	21	0.706	0.281	0.0060012
GO bp:go cerebellar purkinje cell layer formation	10	0.951	0.379	0.0060768
GO bp:go cerebellar purkinje cell differentiation	10	0.951	0.379	0.0060768
GO bp:go dna integrity checkpoint	143	0.234	0.0934	0.0060776
GO bp:go cellular response to carbohydrate stimulus	72	0.334	0.133	0.0061742
GO bp:go forebrain development	343	0.165	0.0662	0.0062431
GO bp:go regulation of n methyl d aspartate selective glutamate receptor activity	14	0.829	0.333	0.0063835
GO mf:go sequence specific dna binding	977	0.0997	0.04	0.0063868
Curated gene sets:kegg adherens junction	70	0.369	0.149	0.0064475
Curated gene sets:pid foxo pathway	48	0.432	0.174	0.0064759
Curated gene sets:biocarta bad pathway	25	0.58	0.234	0.006495
GO bp:go nuclear chromosome segregation	218	0.193	0.0778	0.0065628
GO bp:go cell differentiation in hindbrain	20	0.7	0.283	0.0066655
GO cc:go plasma membrane raft	86	0.315	0.127	0.0066662
GO cc:go cell junction	1101	0.0908	0.0367	0.006673
Curated gene sets:reactome rora activates circadian expression	23	0.589	0.238	0.0067371
GO bp:go locomotory behavior	177	0.219	0.089	0.0068445
Curated gene sets:reactome circadian repression of expression by rev erba	22	0.61	0.248	0.0068584
GO bp:go cardiac chamber formation	11	0.856	0.348	0.0069313
GO bp:go forebrain neuron fate commitment	12	0.869	0.354	0.0070085
GO bp:go sexual reproduction	663	0.111	0.045	0.0070108
GO bp:go vesicle mediated transport between endosomal compartments	19	0.739	0.301	0.0070768
GO bp:go interleukin 1 mediated signaling pathway	12	0.854	0.348	0.007079
GO bp:go cellular response to ionizing radiation	51	0.385	0.157	0.0071213
GO bp:go regulation of filopodium assembly	37	0.475	0.194	0.0072235
Curated gene sets:burton adipogenesis 12	34	0.504	0.206	0.0072915
Curated gene sets:reactome double strand break repair	22	0.56	0.23	0.0073815
GO bp:go signal transduction in absence of ligand	33	0.511	0.21	0.0074972
GO bp:go extrinsic apoptotic signaling pathway in absence of ligand	33	0.511	0.21	0.0074972
GO cc:go gaba receptor complex	14	0.987	0.406	0.0075893
GO bp:go regulation of chromatin organization	143	0.236	0.0974	0.0076192
Curated gene sets:kegg neurotrophin signaling pathway	121	0.263	0.108	0.007722
Curated gene sets:reactome serotonin receptors	11	0.93	0.384	0.0077493
Curated gene sets:lin npas4 targets dn	66	0.35	0.145	0.0078375
Curated gene sets:reactome ligand gated ion channel transport	18	0.804	0.333	0.0078966
GO bp:go protein localization to kinetochore	11	0.754	0.312	0.0078981
GO bp:go dopaminergic neuron differentiation	27	0.606	0.251	0.007917
GO bp:go sister chromatid segregation	168	0.211	0.0873	0.0079296
GO bp:go positive regulation of cellular component organization	1106	0.0864	0.0358	0.0079366
GO bp:go hemoglobin metabolic process	10	0.862	0.36	0.0082527
Curated gene sets:spielman lymphoblast european vs asian up	459	0.127	0.0528	0.0082553
Curated gene sets:wotton runx targets up	21	0.658	0.275	0.0082588
Curated gene sets:reactome cell cycle mitotic	301	0.152	0.0635	0.0082724
GO mf:go protein phosphatase 2a binding	27	0.531	0.222	0.0082742
GO mf:go rna polymerase ii core promoter sequence specific dna binding	51	0.396	0.165	0.008304
GO bp:go regulation of transcription from rna polymerase ii promoter	1685	0.0724	0.0303	0.0084208
GO bp:go g1 dna damage checkpoint	73	0.307	0.128	0.0084353
GO bp:go forebrain regionalization	25	0.586	0.245	0.0084559
GO bp:go dna packaging	169	0.237	0.0994	0.0084828
Curated gene sets:kegg endometrial cancer	51	0.414	0.174	0.0085286
GO bp:go negative regulation of cell cycle phase transition	144	0.224	0.0939	0.0085394
GO cc:go cell projection	1712	0.0722	0.0303	0.0085694
GO cc:go transport vesicle	321	0.153	0.0641	0.0086078
Curated gene sets:reactome dscam interactions	11	0.917	0.385	0.0086387
Curated gene sets:zhang tlx targets 60hr up	286	0.167	0.0702	0.0086452
GO cc:go chloride channel complex	42	0.486	0.204	0.0086928
Curated gene sets:reactome mrna decay by 5 to 3 exoribonuclease	14	0.695	0.293	0.0088476
GO bp:go negative regulation of gene expression	1419	0.0779	0.0329	0.0089093
GO cc:go early endosome	292	0.161	0.0681	0.0089107
GO bp:go protein autoubiquitination	47	0.412	0.174	0.008921
GO bp:go positive regulation of muscle cell differentiation	83	0.321	0.136	0.0089563
GO cc:go ampa glutamate receptor complex	24	0.586	0.248	0.0090547
GO mf:go androgen receptor binding	39	0.489	0.208	0.0091825
Curated gene sets:pilon klf1 targets dn	1902	0.0663	0.0282	0.0093047
Curated gene sets:pid pdgfra pathway	21	0.596	0.253	0.0093462
Curated gene sets:biocarta ras pathway	21	0.634	0.27	0.0094162
GO cc:go cation channel complex	162	0.225	0.0958	0.0094522
GO bp:go cerebellar cortex development	44	0.374	0.16	0.009557
GO bp:go peptidyl amino acid modification	796	0.0983	0.042	0.00966
Curated gene sets:nikolsky breast cancer 17q21 q25 amplicon	331	0.274	0.117	0.009713
Curated gene sets:mahadevan imatinib resistance dn	19	0.651	0.279	0.0097275
Curated gene sets:ding lung cancer mutated significantly	24	0.612	0.262	0.0097376
Curated gene sets:pid ar pathway	60	0.344	0.147	0.0098078
GO bp:go negative regulation of cell cycle g1 s phase transition	97	0.264	0.113	0.0098539
Curated gene sets:yang breast cancer esr1 bulk up	28	0.584	0.251	0.0099744
GO bp:go spindle checkpoint	25	0.573	0.246	0.0099856
Curated gene sets:valk aml with t 8 21 translocation	4	1.36	0.587	0.010068
GO bp:go regulation of synaptic plasticity	136	0.235	0.101	0.010079
GO bp:go golgi to vacuole transport	27	0.555	0.239	0.010127
GO bp:go regulation of sterol transport	38	0.461	0.199	0.010158
GO bp:go regulation of cholesterol transport	38	0.461	0.199	0.010158
Curated gene sets:schaeffer prostate development and cancer box5 up	11	0.825	0.356	0.010182
GO bp:go dna replication independent nucleosome assembly	50	0.364	0.157	0.010212
GO bp:go dna replication independent nucleosome organization	50	0.364	0.157	0.010212
GO bp:go cell cycle	1267	0.0761	0.0329	0.010308
GO mf:go mrna 3 utr binding	47	0.382	0.165	0.010344
GO cc:go nuclear chromosome telomeric region	130	0.227	0.0981	0.010388
Curated gene sets:browne hcmv infection 18hr up	171	0.2	0.0864	0.010429
GO bp:go cerebellar cortex morphogenesis	29	0.469	0.203	0.010456
GO bp:go chromosome segregation	259	0.164	0.0714	0.010632
Curated gene sets:fontaine papillary thyroid carcinoma up	59	0.353	0.154	0.010853
Curated gene sets:nikolsky overconnected in breast cancer	22	0.627	0.274	0.011107
GO bp:go glucose import	12	0.689	0.301	0.011135
GO cc:go methyltransferase complex	84	0.271	0.118	0.011166
GO bp:go gastrulation with mouth forming second	26	0.531	0.233	0.011167
GO bp:go golgi to endosome transport	19	0.636	0.279	0.011271
GO bp:go regulation of neuroblast proliferation	28	0.477	0.209	0.011363
Curated gene sets:dairkee cancer prone response bpa e2	112	0.242	0.106	0.011415
GO bp:go fear response	27	0.473	0.208	0.011426
GO cc:go chromosome centromeric region	164	0.2	0.0878	0.01147
GO bp:go negative regulation of humoral immune response	11	0.942	0.414	0.011531
Curated gene sets:nuytten nipp1 targets dn	807	0.0926	0.0409	0.011771
GO bp:go schwann cell differentiation	30	0.515	0.228	0.011923
GO bp:go regulation of cholesterol homeostasis	11	0.784	0.347	0.011944
GO cc:go neuronal postsynaptic density	51	0.38	0.169	0.012023
GO bp:go positive regulation of cell junction assembly	23	0.527	0.234	0.01203
GO bp:go dendritic spine organization	16	0.662	0.293	0.012055
GO mf:go double stranded dna binding	733	0.1	0.0444	0.012075
GO bp:go homeostasis of number of cells	168	0.204	0.0906	0.012254
Curated gene sets:reactome role of dcc in regulating apoptosis	9	1.02	0.455	0.01226
GO bp:go dna recombination	200	0.183	0.0815	0.012464
GO mf:go poly pyrimidine tract binding	16	0.519	0.232	0.012583
GO mf:go inorganic anion transmembrane transporter activity	119	0.26	0.116	0.012589
GO bp:go protein localization to chromosome	44	0.371	0.166	0.012629
Curated gene sets:cairo hepatoblastoma classes up	583	0.106	0.0473	0.01265
Curated gene sets:sig pip3 signaling in cardiac myoctes	63	0.336	0.15	0.012654
Curated gene sets:ikeda mir30 targets up	112	0.257	0.115	0.012691
Curated gene sets:lastowska neuroblastoma copy number dn	787	0.107	0.048	0.012705
GO bp:go response to electrical stimulus	42	0.394	0.176	0.012733
GO bp:go positive regulation of histone h3 k4 methylation	15	0.756	0.338	0.012757
Curated gene sets:biocarta par1 pathway	35	0.459	0.206	0.012765
Curated gene sets:mcclung cocaine reward 5d	77	0.304	0.136	0.012847
Curated gene sets:nikolsky breast cancer 20q11 amplicon	31	0.975	0.437	0.012879
Curated gene sets:rodrigues thyroid carcinoma dn	75	0.325	0.146	0.012889
Curated gene sets:he pten targets dn	7	0.981	0.44	0.012889
Curated gene sets:schlosser myc and serum response synergy	32	0.423	0.19	0.012904
GO bp:go myeloid cell development	41	0.375	0.168	0.012937
GO bp:go dorsal spinal cord development	21	0.568	0.255	0.01298
Curated gene sets:theilgaard neutrophil at skin wound dn	215	0.171	0.0767	0.013058
Curated gene sets:biocarta edg1 pathway	28	0.507	0.228	0.013177
GO mf:go n methyltransferase activity	86	0.275	0.124	0.013184
GO mf:go h4 histone acetyltransferase activity	15	0.737	0.332	0.013258
Curated gene sets:sagiv cd24 targets up	21	0.542	0.244	0.013351
GO bp:go positive regulation of transcription from rna polymerase ii promoter	967	0.0879	0.0397	0.013377
Curated gene sets:reactome meiotic recombination	82	0.348	0.157	0.013384
Curated gene sets:benporath sox2 targets	713	0.0968	0.0437	0.013436
Curated gene sets:reactome meiosis	108	0.282	0.128	0.0136
Curated gene sets:reactome trafficking of glur2 containing ampa receptors	13	0.661	0.3	0.01362
GO bp:go positive regulation of chromatin modification	82	0.29	0.131	0.013621
GO bp:go chromatin assembly or disassembly	153	0.229	0.104	0.013859
Curated gene sets:boyault liver cancer subclass g1 up	111	0.235	0.107	0.013868
GO bp:go hindbrain morphogenesis	39	0.389	0.177	0.013915
Curated gene sets:mikkelsen mef hcp with h3k27me3	584	0.109	0.0498	0.014027
GO bp:go histone h3 k4 trimethylation	13	0.702	0.32	0.014196
Curated gene sets:mikkelsen mef hcp with h3 unmethylated	192	0.192	0.0877	0.014283
GO cc:go cell body	476	0.122	0.0558	0.014296
GO bp:go positive regulation of regulated secretory pathway	47	0.373	0.171	0.014316
GO bp:go positive regulation of dendrite extension	18	0.583	0.266	0.014392
GO bp:go regulation of dendrite extension	18	0.583	0.266	0.014392
Curated gene sets:benporath eed targets	990	0.0892	0.0408	0.014438
Curated gene sets:browne hcmv infection 12hr dn	98	0.255	0.117	0.014447
GO bp:go phosphatidylinositol 3 kinase signaling	26	0.537	0.246	0.014474
GO cc:go cell cell adherens junction	53	0.328	0.151	0.014677
Curated gene sets:park hsc and multipotent progenitors	47	0.346	0.159	0.014699
Curated gene sets:kegg wnt signaling pathway	146	0.218	0.1	0.01482
Curated gene sets:nakamura tumor zone peripheral vs central dn	577	0.107	0.0491	0.014845
GO bp:go cell junction organization	179	0.193	0.0888	0.015057
Curated gene sets:farmer breast cancer cluster 5	18	0.712	0.329	0.01512
GO bp:go response to salt	15	0.617	0.285	0.015132
GO bp:go protein import into nucleus translocation	28	0.428	0.198	0.015166
GO bp:go modulation of synaptic transmission	290	0.151	0.0699	0.015304
Curated gene sets:terao aox4 targets skin dn	27	0.476	0.22	0.015306
GO bp:go synaptic signaling	404	0.13	0.06	0.015344
GO bp:go circadian rhythm	134	0.217	0.1	0.015382
GO mf:go anion channel activity	81	0.298	0.138	0.015456
Curated gene sets:pujana brca1 pcc network	1558	0.0654	0.0303	0.015484
Curated gene sets:reactome activation of bh3 only proteins	16	0.632	0.293	0.015569
GO mf:go amine binding	9	0.897	0.416	0.015582
GO bp:go regulation of potassium ion transmembrane transport	59	0.352	0.163	0.015615
GO bp:go cellular response to calcium ion	48	0.383	0.178	0.015725
GO bp:go neuron projection guidance	198	0.188	0.0875	0.015729
Curated gene sets:mcclung creb1 targets dn	54	0.358	0.166	0.015749
GO bp:go gamma aminobutyric acid signaling pathway	20	0.647	0.301	0.015779
GO cc:go baf type complex	23	0.51	0.237	0.015855
Curated gene sets:browne hcmv infection 1hr dn	204	0.168	0.0785	0.015928
GO bp:go regulation of glycoprotein metabolic process	41	0.39	0.182	0.015985
GO bp:go lens fiber cell differentiation	25	0.579	0.27	0.016001
Curated gene sets:scheidereit ikk targets	18	0.647	0.302	0.016042
Curated gene sets:card mir302a targets	74	0.31	0.145	0.016182
Curated gene sets:biocarta erk5 pathway	18	0.58	0.271	0.016204
Curated gene sets:rozanov mmp14 targets dn	32	0.414	0.194	0.016272
Curated gene sets:pid fgf pathway	55	0.343	0.161	0.016321
GO bp:go rna splicing via transesterification reactions	252	0.149	0.07	0.016341
GO mf:go s acyltransferase activity	27	0.461	0.216	0.016344
GO mf:go steroid hormone receptor binding	79	0.31	0.145	0.016359
Curated gene sets:lein neuron markers	59	0.322	0.151	0.016366
GO cc:go voltage gated calcium channel complex	39	0.404	0.189	0.016374
Curated gene sets:reactome g protein beta gamma signalling	28	0.49	0.23	0.016444
GO bp:go cellular response to gamma radiation	18	0.607	0.285	0.016473
Curated gene sets:nuytten ezh2 targets dn	971	0.0804	0.0377	0.016494
Curated gene sets:fournier acinar development early dn	6	1.17	0.549	0.016533
Curated gene sets:reactome cell cell communication	116	0.242	0.114	0.016653
Curated gene sets:reactome cell junction organization	75	0.293	0.138	0.017202
GO bp:go cellular response to toxic substance	25	0.503	0.238	0.017388
Curated gene sets:yemelyanov gr targets dn	9	0.853	0.404	0.017457
GO bp:go cell cell adhesion via plasma membrane adhesion molecules	194	0.206	0.0979	0.017493
Curated gene sets:reactome metabolism of mrna	204	0.17	0.0806	0.017526
Curated gene sets:boyault liver cancer subclass g1 dn	39	0.371	0.177	0.017778
GO cc:go chromosome telomeric region	160	0.185	0.0882	0.017787
GO bp:go positive regulation of mitochondrial fission	14	0.566	0.27	0.017947
GO bp:go negative regulation of cell cycle process	206	0.165	0.0786	0.018093
GO bp:go regulation of cholesterol efflux	20	0.557	0.266	0.018097
GO mf:go poly a rna binding	1118	0.0718	0.0343	0.018131
GO bp:go erythrocyte development	22	0.462	0.221	0.018156
Curated gene sets:dairkee cancer prone response bpa	52	0.343	0.164	0.018167
GO cc:go mismatch repair complex	10	0.742	0.355	0.018286
Curated gene sets:biocarta mcm pathway	18	0.601	0.288	0.018347
GO bp:go positive regulation of protein deacetylation	18	0.574	0.275	0.018444
Curated gene sets:abdelmohsen elavl4 targets	16	0.616	0.295	0.018473
GO bp:go regulation of protein localization to cell surface	26	0.44	0.211	0.018507
GO bp:go toll like receptor 9 signaling pathway	12	0.703	0.337	0.01851
Curated gene sets:li cisplatin resistance up	25	0.569	0.273	0.018639
GO bp:go rna modification	113	0.222	0.106	0.018743
GO bp:go positive regulation of phosphatase activity	26	0.517	0.249	0.01879
Curated gene sets:benporath oct4 targets	275	0.149	0.0715	0.018817
GO bp:go ensheathment of neurons	89	0.268	0.129	0.019024
GO bp:go axon ensheathment	89	0.268	0.129	0.019024
GO bp:go cell cycle process	1050	0.0743	0.0359	0.019105
Curated gene sets:morosetti facioscapulohumeral muscular distrophy dn	12	0.71	0.343	0.019136
GO bp:go regulation of delayed rectifier potassium channel activity	18	0.616	0.298	0.019265
Curated gene sets:seitz neoplastic transformation by 8p deletion dn	29	0.45	0.218	0.019332
GO bp:go regulation of synapse assembly	72	0.304	0.147	0.019358
GO bp:go cellular response to antibiotic	17	0.587	0.284	0.019391
GO mf:go ligand dependent nuclear receptor binding	23	0.5	0.242	0.01951
GO bp:go cerebellar purkinje cell layer morphogenesis	13	0.639	0.31	0.019542
Curated gene sets:tcga glioblastoma copy number dn	29	0.543	0.263	0.019611
GO bp:go cytokinetic process	14	0.621	0.302	0.019654
Curated gene sets:mikkelsen npc hcp with h3k4me3 and h3k27me3	209	0.175	0.0847	0.01966
GO cc:go saga complex	7	0.896	0.435	0.019692
Curated gene sets:meissner npc hcp with h3k4me3 and h3k27me3	142	0.214	0.104	0.019718
Curated gene sets:mili pseudopodia haptotaxis up	477	0.113	0.0547	0.019737
Curated gene sets:lopez epithelioid mesothelioma	17	0.606	0.294	0.019754
GO mf:go high voltage gated calcium channel activity	10	0.767	0.373	0.019812
GO bp:go reproductive behavior	30	0.439	0.214	0.01985
Curated gene sets:rizki tumor invasiveness 3d dn	258	0.148	0.0722	0.01991
Curated gene sets:zhang response to cantharidin dn	66	0.293	0.143	0.019949
GO mf:go regulatory region nucleic acid binding	783	0.0899	0.0438	0.019991
GO bp:go spinal cord development	103	0.248	0.121	0.020077
Curated gene sets:mikkelsen ips hcp with h3 unmethylated	76	0.272	0.132	0.020113
GO bp:go antigen processing and presentation of endogenous peptide antigen	15	0.615	0.3	0.020195
GO bp:go negative regulation of substrate adhesion dependent cell spreading	13	0.621	0.303	0.020195
Curated gene sets:zhang tlx targets 36hr dn	175	0.173	0.0844	0.020292
GO bp:go regulation of cell substrate adhesion	167	0.181	0.0886	0.020295
GO bp:go rna splicing	339	0.123	0.06	0.020317
GO bp:go myelination in peripheral nervous system	22	0.551	0.27	0.020658
GO bp:go peripheral nervous system axon ensheathment	22	0.551	0.27	0.020658
GO bp:go positive regulation of pri mirna transcription from rna polymerase ii promoter	11	0.795	0.39	0.020688
GO bp:go estrous cycle	19	0.629	0.309	0.020835
Curated gene sets:monnier postradiation tumor escape dn	356	0.128	0.0627	0.020938
GO bp:go nadp metabolic process	28	0.48	0.236	0.021017
GO bp:go activation of mapkkk activity	11	0.748	0.369	0.021165
GO cc:go calcium channel complex	60	0.32	0.157	0.021177
Curated gene sets:biocarta igf1mtor pathway	19	0.525	0.259	0.021243
GO bp:go glycosphingolipid metabolic process	63	0.31	0.153	0.021256
Curated gene sets:st differentiation pathway in pc12 cells	42	0.346	0.171	0.021344
GO bp:go dendrite morphogenesis	39	0.376	0.186	0.021371
Curated gene sets:reactome role of second messengers in netrin1 signaling	8	0.92	0.455	0.021527
Curated gene sets:zembutsu sensitivity to vincristine	17	0.55	0.272	0.021669
GO cc:go wash complex	10	0.878	0.435	0.021836
GO mf:go telomeric dna binding	30	0.381	0.189	0.02185
GO cc:go midbody	129	0.203	0.101	0.021902
Curated gene sets:kegg mapk signaling pathway	256	0.148	0.0737	0.022121
GO bp:go ceramide metabolic process	72	0.302	0.15	0.02218
GO bp:go positive regulation of filopodium assembly	25	0.465	0.231	0.022259
Curated gene sets:pellicciotta hdac in antigen presentation dn	52	0.315	0.157	0.022343
GO bp:go gamete generation	532	0.101	0.0503	0.022481
Curated gene sets:ginestier breast cancer znf217 amplified dn	312	0.125	0.0624	0.022482
GO mf:go phospholipase c activity	30	0.419	0.209	0.022609
GO bp:go multicellular organism reproduction	702	0.0885	0.0442	0.02261
GO bp:go brain morphogenesis	34	0.398	0.199	0.022629
GO mf:go single stranded dna binding	86	0.233	0.116	0.022723
GO bp:go calcium dependent cell cell adhesion via plasma membrane cell adhesion molecules	26	0.468	0.234	0.022843
GO bp:go positive regulation of histone deacetylation	14	0.6	0.3	0.022893
GO bp:go positive regulation of glycoprotein metabolic process	20	0.549	0.275	0.022895
GO mf:go metalloexopeptidase activity	51	0.354	0.178	0.023017
Curated gene sets:pujana chek2 pcc network	744	0.0839	0.0421	0.023025
GO bp:go centromere complex assembly	46	0.324	0.163	0.023102
GO bp:go ganglioside metabolic process	26	0.478	0.24	0.023184
GO mf:go voltage gated ion channel activity	178	0.178	0.0894	0.023227
GO bp:go neurotransmitter biosynthetic process	14	0.699	0.351	0.023243
GO bp:go regulation of pri mirna transcription from rna polymerase ii promoter	17	0.625	0.314	0.023286
GO bp:go cellular amide metabolic process	690	0.0887	0.0446	0.023328
Curated gene sets:pid aurora b pathway	39	0.342	0.172	0.023404
Curated gene sets:reactome neurotransmitter receptor binding and downstream transmission in the postsynaptic cell	126	0.22	0.111	0.023607
GO bp:go histone h4 k16 acetylation	15	0.528	0.266	0.023626
GO cc:go nuclear speck	184	0.168	0.085	0.023886
GO cc:go postsynaptic membrane	188	0.183	0.0923	0.023916
Curated gene sets:rickman tumor differentiated well vs poorly up	224	0.155	0.0784	0.024026
Curated gene sets:nikolsky breast cancer 19q13.1 amplicon	22	0.694	0.351	0.024084
Curated gene sets:nielsen schwannoma dn	18	0.595	0.301	0.024103
Curated gene sets:wakabayashi adipogenesis pparg rxra bound with h4k20me1 mark	141	0.201	0.102	0.024148
Curated gene sets:hoffmann small pre bii to immature b lymphocyte dn	49	0.315	0.159	0.024171
Curated gene sets:reactome g beta gamma signalling through plc beta	20	0.533	0.27	0.024266
Curated gene sets:farmer breast cancer apocrine vs basal	311	0.133	0.0672	0.024312
Curated gene sets:pid p38 mkk3 6pathway	26	0.468	0.238	0.02432
GO cc:go apical dendrite	14	0.632	0.321	0.024331
GO bp:go single organism cellular localization	862	0.0795	0.0404	0.024379
Curated gene sets:cairo hepatoblastoma up	197	0.163	0.0828	0.024428
Curated gene sets:reactome mapk targets nuclear events mediated by map kinases	28	0.417	0.212	0.024563
GO bp:go hippocampus development	68	0.291	0.148	0.024608
Curated gene sets:biocarta pdgf pathway	31	0.436	0.222	0.02475
GO bp:go startle response	24	0.502	0.256	0.024827
GO bp:go interspecies interaction between organisms	641	0.0911	0.0465	0.025053
GO bp:go symbiosis encompassing mutualism through parasitism	641	0.0911	0.0465	0.025053
GO mf:go transferase activity transferring one carbon groups	212	0.154	0.0784	0.025128
GO cc:go lateral plasma membrane	49	0.319	0.163	0.025145
GO mf:go translation regulator activity nucleic acid binding	17	0.625	0.319	0.025151
Curated gene sets:pid myc repress pathway	64	0.275	0.141	0.025247
GO bp:go bone cell development	21	0.499	0.255	0.025275
GO bp:go synapse assembly	61	0.328	0.168	0.025385
Curated gene sets:reactome neuronal system	263	0.149	0.0761	0.025413
Curated gene sets:reactome activation of the pre replicative complex	28	0.401	0.205	0.025519
GO bp:go regulation of protein stability	209	0.163	0.0836	0.025757
GO bp:go cell development	1373	0.0648	0.0333	0.025892
GO mf:go basal transcription machinery binding	27	0.443	0.228	0.025919
GO bp:go positive regulation of chromosome organization	144	0.184	0.0948	0.026019
GO bp:go oligosaccharide metabolic process	64	0.284	0.146	0.026169
GO bp:go schwann cell development	25	0.487	0.251	0.026204
Curated gene sets:marson foxp3 targets stimulated dn	11	0.642	0.331	0.026311
GO bp:go regulation of type i interferon mediated signaling pathway	38	0.409	0.211	0.026409
Curated gene sets:aston major depressive disorder dn	151	0.187	0.0967	0.026523
Curated gene sets:maekawa atf2 targets	23	0.49	0.253	0.026549
GO bp:go positive regulation of cell matrix adhesion	40	0.346	0.179	0.026785
GO bp:go cell differentiation in spinal cord	54	0.341	0.177	0.026951
GO bp:go regulation of synaptic transmission glutamatergic	48	0.354	0.184	0.027001
GO bp:go rrna methylation	17	0.566	0.294	0.027079
Curated gene sets:reactome erk mapk targets	19	0.471	0.245	0.027228
GO bp:go rna localization	170	0.163	0.0849	0.027368
Curated gene sets:zhan multiple myeloma subgroups	30	0.348	0.181	0.027427
GO mf:go metallocarboxypeptidase activity	25	0.492	0.256	0.027469
GO mf:go rna polymerase ii transcription factor activity sequence specific dna binding	602	0.097	0.0505	0.027518
Curated gene sets:hirsch cellular transformation signature dn	97	0.228	0.119	0.02754
GO mf:go inward rectifier potassium channel activity	21	0.474	0.248	0.027664
Curated gene sets:pid ar nongenomic pathway	30	0.403	0.21	0.027763
GO mf:go zinc ion binding	1084	0.0694	0.0363	0.027771
Curated gene sets:fardin hypoxia 11	30	0.419	0.219	0.027817
Curated gene sets:schlesinger methylated de novo in cancer	84	0.256	0.134	0.028217
GO bp:go regulation of protein sumoylation	18	0.519	0.272	0.028398
Curated gene sets:lein localized to proximal dendrites	34	0.364	0.191	0.02845
GO bp:go protein stabilization	124	0.205	0.107	0.028494
Curated gene sets:oxford rala or ralb targets up	45	0.302	0.159	0.028579
Curated gene sets:pid ilk pathway	44	0.309	0.163	0.028771
Curated gene sets:camps colon cancer copy number dn	58	0.324	0.171	0.028861
Curated gene sets:reactome deadenylation dependent mrna decay	44	0.329	0.174	0.029087
Curated gene sets:amundson response to arsenite	203	0.153	0.0807	0.029122
GO cc:go condensed nuclear chromosome	79	0.247	0.131	0.029172
Curated gene sets:weigel oxidative stress response	34	0.383	0.202	0.029223
Curated gene sets:laiho colorectal cancer serrated dn	65	0.254	0.134	0.029257
Curated gene sets:gross hypoxia via elk3 up	205	0.153	0.0811	0.029276
GO bp:go cytokinesis	80	0.241	0.128	0.029394
Curated gene sets:myllykangas amplification hot spot 14	3	1.62	0.857	0.02941
Curated gene sets:grade colon vs rectal cancer up	36	0.368	0.195	0.029443
Curated gene sets:kegg non small cell lung cancer	54	0.318	0.168	0.029629
Curated gene sets:hasina nol7 targets up	11	0.736	0.391	0.029679
GO bp:go indole containing compound metabolic process	23	0.452	0.24	0.029887
Curated gene sets:schaeffer prostate development 48hr dn	410	0.116	0.0617	0.029995
Curated gene sets:pujana breast cancer lit int network	95	0.217	0.115	0.030069
Curated gene sets:myllykangas amplification hot spot 9	8	0.794	0.423	0.030146
Curated gene sets:kayo aging muscle up	222	0.143	0.076	0.030295
Curated gene sets:reactome activation of atr in response to replication stress	35	0.326	0.174	0.030305
Curated gene sets:kreppel cd99 targets dn	8	0.811	0.432	0.030409
GO bp:go mechanosensory behavior	12	0.711	0.379	0.030437
GO bp:go locomotory exploration behavior	11	0.744	0.397	0.030461
Curated gene sets:biocarta rna pathway	9	0.666	0.356	0.03064
GO cc:go u2 type prespliceosome	16	0.484	0.259	0.030755
Curated gene sets:biocarta pten pathway	18	0.495	0.265	0.030768
Curated gene sets:gozgit esr1 targets up	131	0.195	0.104	0.03095
Curated gene sets:pid p53 regulation pathway	58	0.31	0.166	0.030951
GO cc:go plasma membrane protein complex	493	0.104	0.0555	0.031031
Curated gene sets:scian inversed targets of tp53 and tp73 up	11	0.584	0.313	0.031095
Curated gene sets:jain nfkb signaling	75	0.245	0.132	0.031108
Curated gene sets:pid telomerase pathway	66	0.259	0.139	0.031177
GO bp:go localization within membrane	117	0.19	0.102	0.031199
GO cc:go exocytic vesicle membrane	54	0.304	0.163	0.031387
Curated gene sets:reactome voltage gated potassium channels	42	0.343	0.185	0.031628
GO bp:go morphogenesis of an epithelial sheet	42	0.319	0.172	0.031659
GO bp:go regulation of anatomical structure morphogenesis	985	0.0714	0.0385	0.031841
Curated gene sets:reactome transmission across chemical synapses	172	0.175	0.0945	0.031888
GO bp:go regulation of mitochondrial fission	18	0.444	0.24	0.032022
Curated gene sets:zhu skil targets up	20	0.476	0.257	0.032079
GO bp:go negative regulation of telomere maintenance via telomere lengthening	16	0.483	0.261	0.03208
GO mf:go voltage gated potassium channel activity	85	0.238	0.129	0.03241
Curated gene sets:grabarczyk bcl11b targets dn	53	0.285	0.154	0.032446
Curated gene sets:yao temporal response to progesterone cluster 17	177	0.155	0.0842	0.032446
GO bp:go positive regulation of excitatory postsynaptic potential	20	0.502	0.273	0.032902
GO bp:go response to histamine	11	0.685	0.373	0.032932
GO mf:go ionotropic glutamate receptor binding	21	0.472	0.257	0.032938
Curated gene sets:mcbryan pubertal breast 5 6wk dn	130	0.189	0.103	0.032982
GO bp:go negative regulation of jak stat cascade	42	0.317	0.172	0.032984
GO bp:go negative regulation of stat cascade	42	0.317	0.172	0.032984
GO bp:go negative regulation of mitotic cell cycle	194	0.149	0.081	0.033057
GO bp:go platelet morphogenesis	16	0.49	0.267	0.033118
GO bp:go adherens junction assembly	32	0.389	0.212	0.033137
Curated gene sets:reactome glycosphingolipid metabolism	31	0.365	0.199	0.033173
Curated gene sets:biocarta neurotransmitters pathway	6	0.859	0.468	0.033176
Curated gene sets:ivanov mutated in colon cancer	13	0.526	0.287	0.033196
GO bp:go regulation of developmental growth	277	0.134	0.0732	0.03335
GO bp:go inorganic anion transport	117	0.211	0.115	0.033485
GO bp:go linoleic acid metabolic process	13	0.602	0.329	0.033497
Curated gene sets:pid p75 ntr pathway	62	0.267	0.146	0.033502
GO bp:go dendritic spine development	16	0.587	0.321	0.033641
GO mf:go enhancer binding	89	0.222	0.121	0.033677
GO bp:go negative regulation of protein processing	31	0.395	0.216	0.03368
GO bp:go negative regulation of protein maturation	31	0.395	0.216	0.03368
Curated gene sets:reactome map kinase activation in tlr cascade	44	0.322	0.176	0.033982
Curated gene sets:mullighan npm1 signature 3 up	320	0.117	0.064	0.03401
Curated gene sets:zirn tretinoin response wt1 up	23	0.453	0.248	0.034071
Curated gene sets:pangas tumor suppression by smad1 and smad5 dn	151	0.178	0.0978	0.034416
Curated gene sets:tseng irs1 targets up	106	0.201	0.11	0.034446
GO cc:go invadopodium	10	0.632	0.348	0.034696
GO bp:go cell projection organization	867	0.0745	0.0411	0.034861
GO bp:go regulation of muscle cell differentiation	149	0.18	0.0994	0.035139
Curated gene sets:nemeth inflammatory response lps dn	31	0.386	0.214	0.035271
Curated gene sets:acevedo liver cancer up	923	0.0706	0.0391	0.035495
GO bp:go signal transduction by p53 class mediator	121	0.184	0.102	0.035547
GO bp:go modulation of excitatory postsynaptic potential	28	0.425	0.236	0.035605
GO bp:go regulation of telomere maintenance via telomere lengthening	48	0.284	0.157	0.035848
Curated gene sets:reactome g2 m checkpoints	41	0.301	0.167	0.035922
Curated gene sets:basaki ybx1 targets dn	350	0.115	0.0638	0.036047
Curated gene sets:marson bound by foxp3 unstimulated	1184	0.0647	0.0361	0.03633
Curated gene sets:reactome deposition of new cenpa containing nucleosomes at the centromere	60	0.309	0.172	0.03646
GO mf:go beta catenin binding	77	0.244	0.136	0.036476
GO bp:go regulation of cell junction assembly	66	0.258	0.144	0.036558
Curated gene sets:mcclung delta fosb targets 8wk	43	0.317	0.177	0.036653
Curated gene sets:rome insulin targets in muscle dn	175	0.16	0.0893	0.036687
Curated gene sets:reactome sema4d induced cell migration and growth cone collapse	24	0.431	0.241	0.036717
GO bp:go lymph vessel morphogenesis	13	0.587	0.328	0.036726
Curated gene sets:reactome trans golgi network vesicle budding	52	0.286	0.16	0.036736
Curated gene sets:kumamoto response to nutlin 3a up	9	0.666	0.372	0.036758
Curated gene sets:breuhahn growth factor signaling in liver cancer	22	0.487	0.272	0.036771
GO bp:go retina vasculature development in camera type eye	15	0.54	0.302	0.036829
Curated gene sets:gali tp53 targets apoptotic dn	6	0.923	0.516	0.036889
GO bp:go mitotic spindle assembly	37	0.354	0.198	0.037063
GO bp:go microtubule cytoskeleton organization involved in mitosis	37	0.354	0.198	0.037063
GO bp:go central nervous system myelination	11	0.658	0.369	0.03745
GO bp:go axon ensheathment in central nervous system	11	0.658	0.369	0.03745
Curated gene sets:reactome sema4d in semaphorin signaling	29	0.395	0.222	0.037809
GO bp:go nuclear transport	335	0.11	0.0619	0.037816
Curated gene sets:toyota targets of mir34b and mir34c	431	0.0971	0.0547	0.037842
GO bp:go negative regulation of glial cell proliferation	11	0.725	0.408	0.037913
GO mf:go voltage gated calcium channel activity	40	0.331	0.186	0.038042
GO bp:go regulation of peptidyl serine phosphorylation	113	0.201	0.113	0.038046
GO mf:go acetylglucosaminyltransferase activity	46	0.323	0.182	0.038068
GO bp:go nuclear transcribed mrna catabolic process deadenylation dependent decay	57	0.264	0.149	0.038097
GO bp:go glycosylation	258	0.131	0.0738	0.03814
Curated gene sets:st ga13 pathway	36	0.354	0.2	0.038251
GO bp:go exploration behavior	23	0.471	0.266	0.038305
GO mf:go protein methyltransferase activity	81	0.223	0.126	0.038338
GO bp:go lysosome localization	22	0.461	0.26	0.03849
GO mf:go anion anion antiporter activity	22	0.463	0.262	0.038491
Curated gene sets:mcmurray tp53 hras cooperation response dn	65	0.238	0.134	0.038553
GO bp:go alkaloid metabolic process	14	0.516	0.292	0.038662
Curated gene sets:patil liver cancer	697	0.0784	0.0444	0.038799
Curated gene sets:burton adipogenesis 11	52	0.304	0.172	0.038857
Curated gene sets:mueller plurinet	292	0.112	0.0637	0.038869
GO cc:go coated vesicle membrane	133	0.182	0.103	0.03905
GO mf:go rna polymerase ii core binding	19	0.476	0.27	0.039104
Curated gene sets:pid il8 cxcr2 pathway	34	0.337	0.192	0.039108
GO bp:go organic cyclic compound catabolic process	412	0.101	0.0575	0.039112
GO bp:go chromatin remodeling	140	0.178	0.101	0.039258
GO bp:go histone h3 k4 methylation	30	0.372	0.212	0.039392
GO bp:go protein sumoylation	111	0.194	0.111	0.039406
Curated gene sets:calvet irinotecan sensitive vs resistant dn	5	0.787	0.448	0.039553
Curated gene sets:zhan multiple myeloma cd1 and cd2 up	83	0.231	0.132	0.039636
GO mf:go rrna methyltransferase activity	13	0.614	0.35	0.039713
Curated gene sets:reactome trafficking of ampa receptors	25	0.414	0.237	0.040292
GO bp:go negative regulation of cell development	291	0.123	0.0702	0.04039
GO mf:go steroid binding	86	0.212	0.122	0.040558
Curated gene sets:lopes methylated in colon cancer up	27	0.41	0.235	0.04056
Curated gene sets:reactome nuclear events kinase and transcription factor activation	22	0.405	0.232	0.040626
GO mf:go metalloaminopeptidase activity	14	0.587	0.337	0.040638
Curated gene sets:mikkelsen mcv6 icp with h3k4me3 and h3k27me3	32	0.352	0.202	0.040654
Curated gene sets:dasu il6 signaling dn	7	0.921	0.528	0.040664
GO bp:go limbic system development	93	0.22	0.126	0.040685
Curated gene sets:choi atl acute stage	4	1.26	0.724	0.040874
GO bp:go glial cell development	74	0.241	0.139	0.040907
Curated gene sets:reactome packaging of telomere ends	48	0.375	0.216	0.041103
GO bp:go cell morphogenesis involved in differentiation	493	0.0955	0.055	0.041164
GO bp:go regulation of autophagy	243	0.13	0.0748	0.041195
GO bp:go embryonic camera type eye formation	12	0.626	0.36	0.041211
Curated gene sets:yang breast cancer esr1 dn	23	0.431	0.248	0.041286
GO cc:go perinuclear endoplasmic reticulum	12	0.643	0.37	0.041316
GO bp:go glucose homeostasis	166	0.16	0.0921	0.041471
GO bp:go carbohydrate homeostasis	166	0.16	0.0921	0.041471
Curated gene sets:nielsen malignat fibrous histiocytoma dn	17	0.528	0.305	0.041604
GO bp:go regulation of axonogenesis	159	0.167	0.0966	0.041613
GO cc:go presynapse	273	0.123	0.0713	0.041702
Curated gene sets:pid ecadherin nascent aj pathway	39	0.325	0.188	0.041777
Curated gene sets:hoshida liver cancer subclass s2	112	0.182	0.105	0.041844
GO bp:go hepaticobiliary system development	125	0.186	0.108	0.041858
Curated gene sets:bonci targets of mir15a and mir16 1	91	0.222	0.128	0.042028
GO mf:go isomerase activity	150	0.159	0.092	0.042075
Curated gene sets:pid ncadherin pathway	33	0.364	0.211	0.042249
GO bp:go negative regulation of cell morphogenesis involved in differentiation	110	0.198	0.115	0.042273
GO bp:go indolalkylamine metabolic process	15	0.535	0.311	0.042488
GO bp:go sphingolipid metabolic process	132	0.183	0.106	0.0425
GO mf:go neurotrophin receptor binding	13	0.57	0.331	0.04264
GO bp:go cerebellar purkinje cell layer development	23	0.379	0.221	0.042778
Curated gene sets:sakai tumor infiltrating monocytes dn	77	0.237	0.138	0.042806
Curated gene sets:kegg amino sugar and nucleotide sugar metabolism	44	0.299	0.174	0.04281
GO cc:go spindle	276	0.117	0.0679	0.042829
GO bp:go neurotransmitter metabolic process	25	0.447	0.26	0.042907
Curated gene sets:reactome homologous recombination repair of replication independent double strand breaks	16	0.441	0.257	0.042989
Curated gene sets:burton adipogenesis 3	97	0.189	0.11	0.043029
Curated gene sets:pid kit pathway	51	0.289	0.168	0.043224
Curated gene sets:visala response to heat shock and aging up	14	0.437	0.255	0.043245
Curated gene sets:choi atl chronic vs acute dn	18	0.464	0.271	0.043368
Curated gene sets:howlin cited1 targets 2 up	15	0.579	0.338	0.043431
Curated gene sets:chandran metastasis up	199	0.134	0.0786	0.04359
GO bp:go trna aminoacylation	52	0.266	0.155	0.043622
GO bp:go amino acid activation	52	0.266	0.155	0.043622
Curated gene sets:mikkelsen npc icp with h3k4me3	410	0.0989	0.058	0.043975
GO bp:go positive regulation of neuron apoptotic process	45	0.323	0.189	0.044077
Curated gene sets:biocarta g2 pathway	24	0.44	0.258	0.04412
Curated gene sets:nikolsky breast cancer 17q11 q21 amplicon	133	0.331	0.194	0.044147
GO bp:go response to fluid shear stress	34	0.357	0.21	0.044239
Curated gene sets:mitsiades response to aplidin up	412	0.0981	0.0576	0.044283
Curated gene sets:wakabayashi adipogenesis pparg rxra bound 8d	862	0.0694	0.0408	0.044484
GO bp:go cellular monovalent inorganic anion homeostasis	15	0.59	0.347	0.04449
GO bp:go cellular anion homeostasis	15	0.59	0.347	0.04449
GO bp:go positive regulation of neuroblast proliferation	21	0.418	0.246	0.044542
GO mf:go calcium channel regulator activity	38	0.338	0.199	0.04455
GO bp:go neuron fate commitment	67	0.259	0.153	0.044848
GO bp:go autonomic nervous system development	41	0.337	0.199	0.045177
Curated gene sets:mikkelsen mcv6 hcp with h3k27me3	427	0.0997	0.0589	0.045257
Curated gene sets:biocarta longevity pathway	15	0.504	0.298	0.045291
GO bp:go cellular response to organic cyclic compound	453	0.0958	0.0566	0.04538
GO bp:go neuroblast proliferation	28	0.396	0.234	0.045475
GO mf:go phosphatidylinositol phosphate kinase activity	15	0.595	0.352	0.045542
GO mf:go lysine n methyltransferase activity	56	0.254	0.15	0.045779
Curated gene sets:biocarta igf1 pathway	20	0.442	0.263	0.045942
GO bp:go mitotic cell cycle checkpoint	137	0.159	0.0941	0.045971
GO cc:go cis golgi network	39	0.298	0.177	0.046047
Curated gene sets:pid erbb1 downstream pathway	104	0.197	0.117	0.046111
Curated gene sets:wang thoc1 targets dn	17	0.498	0.296	0.046132
GO bp:go ovulation cycle	110	0.194	0.115	0.046187
GO bp:go negative regulation of nucleotide metabolic process	63	0.266	0.158	0.046196
GO bp:go regulation of insulin secretion involved in cellular response to glucose stimulus	49	0.288	0.171	0.04623
Curated gene sets:st jnk mapk pathway	40	0.319	0.19	0.046409
GO bp:go cognition	241	0.129	0.0766	0.046517
GO bp:go cartilage morphogenesis	12	0.628	0.375	0.046665
Curated gene sets:roylance breast cancer 16q copy number up	58	0.357	0.212	0.046666
GO cc:go endosome	755	0.0718	0.0428	0.046704
GO cc:go nuclear body	330	0.102	0.0606	0.046761
Curated gene sets:reactome p75 ntr receptor mediated signalling	71	0.225	0.134	0.04678
GO bp:go positive regulation of phosphoprotein phosphatase activity	15	0.54	0.322	0.047045
GO bp:go negative regulation of lipid storage	18	0.515	0.308	0.047194
Curated gene sets:gary cd5 targets up	443	0.0925	0.0553	0.047237
GO cc:go nucleolus	797	0.0701	0.0419	0.047258
Curated gene sets:chiaradonna neoplastic transformation kras dn	139	0.165	0.0986	0.047285
Curated gene sets:kim gastric cancer chemosensitivity	98	0.187	0.112	0.047359
Curated gene sets:chandran metastasis top50 up	34	0.343	0.206	0.047462
GO mf:go pdz domain binding	88	0.217	0.13	0.047563
Curated gene sets:dunne targets of aml1 mtg8 fusion dn	17	0.479	0.288	0.047842
GO bp:go histone phosphorylation	25	0.387	0.233	0.047908
GO bp:go histone h4 k8 acetylation	12	0.479	0.288	0.047941
GO bp:go histone h4 k5 acetylation	12	0.479	0.288	0.047941
GO mf:go gaba receptor activity	18	0.571	0.343	0.048176
GO bp:go spliceosomal complex assembly	52	0.242	0.146	0.048356
GO bp:go negative regulation of cellular component organization	645	0.0763	0.046	0.048552
Curated gene sets:vanloo sp3 targets dn	86	0.189	0.114	0.048556
GO mf:go thyroid hormone receptor binding	29	0.341	0.206	0.048559
GO bp:go dna conformation change	243	0.132	0.0795	0.048629
GO bp:go inositol lipid mediated signaling	120	0.187	0.113	0.048631
GO bp:go rna processing	785	0.0678	0.0409	0.048672
Curated gene sets:mayburd response to l663536 dn	54	0.253	0.153	0.048815
GO cc:go anchoring junction	473	0.0892	0.0539	0.048833
GO bp:go positive regulation of skeletal muscle tissue development	24	0.431	0.261	0.04902
GO bp:go positive regulation of transcription from rna polymerase ii promoter involved in cellular response to chemical stimulus	27	0.417	0.253	0.049276
Curated gene sets:moreaux multiple myeloma by taci dn	169	0.145	0.0876	0.049279
GO bp:go dendrite development	72	0.227	0.138	0.049344
GO bp:go negative regulation of kinase activity	243	0.122	0.0738	0.049493
GO cc:go myelin sheath	160	0.151	0.0917	0.049521
Curated gene sets:reactome signalling by ngf	202	0.136	0.0824	0.04956
Curated gene sets:reactome g alpha1213 signalling events	69	0.252	0.153	0.049801
GO bp:go signal transduction in response to dna damage	93	0.195	0.118	0.049888
GO bp:go subpallium development	21	0.409	0.249	0.05015
GO bp:go regulation of release of cytochrome c from mitochondria	43	0.28	0.171	0.050236
GO bp:go heterochromatin organization	10	0.859	0.523	0.050319
GO bp:go somitogenesis	58	0.27	0.164	0.050359
GO bp:go regulation of cell cycle process	541	0.081	0.0493	0.050375
Curated gene sets:pid erbb2 erbb3 pathway	45	0.296	0.181	0.050417
GO bp:go citrulline metabolic process	9	0.71	0.433	0.050448
GO bp:go cellular response to retinoic acid	65	0.259	0.158	0.050542
Curated gene sets:burton adipogenesis 4	45	0.269	0.164	0.050577
Curated gene sets:sa pten pathway	17	0.487	0.297	0.050624
GO bp:go positive regulation of protein acetylation	34	0.347	0.212	0.050773
Curated gene sets:seiden oncogenesis by met	84	0.209	0.128	0.050857
GO bp:go regulation of alternative mrna splicing via spliceosome	32	0.317	0.194	0.051113
GO bp:go cellular response to drug	65	0.237	0.145	0.051122
Curated gene sets:davicioni pax foxo1 signature in arms dn	19	0.492	0.301	0.051241
Curated gene sets:biocarta il4 pathway	10	0.509	0.312	0.051289
Curated gene sets:hesson tumor suppressor cluster 3p21 3	7	0.953	0.584	0.051344
GO bp:go regulation of dendritic spine morphogenesis	27	0.404	0.248	0.051364
Curated gene sets:hahtola mycosis fungoides skin up	171	0.142	0.0873	0.051475
Curated gene sets:tien intestine probiotics 6hr up	53	0.263	0.161	0.051624
GO mf:go rna polymerase core enzyme binding	23	0.408	0.25	0.051671
GO bp:go protein modification by small protein removal	104	0.177	0.109	0.051806
GO cc:go membrane protein complex	977	0.0633	0.0389	0.05185
GO mf:go lysine acetylated histone binding	16	0.521	0.32	0.051851
GO bp:go regulation of steroid metabolic process	74	0.216	0.133	0.052013
GO bp:go positive regulation of dendritic spine morphogenesis	12	0.655	0.403	0.052013
GO bp:go bile acid and bile salt transport	31	0.371	0.228	0.052066
GO cc:go nucleoplasm part	660	0.0719	0.0442	0.05218
Curated gene sets:rao bound by sall4 isoform b	492	0.0867	0.0534	0.052203
GO cc:go chromatin	417	0.0977	0.0602	0.05221
Curated gene sets:biocarta tpo pathway	24	0.395	0.243	0.052238
Curated gene sets:qi plasmacytoma dn	96	0.192	0.118	0.052616
GO bp:go protein targeting	390	0.0962	0.0594	0.05263
GO bp:go positive regulation of neurological system process	23	0.436	0.27	0.05317
GO bp:go negative regulation of dna biosynthetic process	30	0.333	0.206	0.053261
Curated gene sets:reactome ptm gamma carboxylation hypusine formation and arylsulfatase activation	21	0.383	0.238	0.053277
GO bp:go neuron cell cell adhesion	13	0.555	0.344	0.053288
GO bp:go adipose tissue development	31	0.371	0.23	0.053362
GO mf:go death receptor binding	16	0.408	0.253	0.053424
GO bp:go chloride transport	88	0.217	0.135	0.053442
Curated gene sets:sesto response to uv c0	100	0.174	0.108	0.053529
GO bp:go embryonic camera type eye morphogenesis	24	0.415	0.258	0.053568
Curated gene sets:pid ecadherin stabilization pathway	42	0.27	0.168	0.05365
GO bp:go lens morphogenesis in camera type eye	18	0.472	0.293	0.053715
GO bp:go regulation of cell cycle g1 s phase transition	143	0.155	0.0963	0.05375
GO bp:go positive regulation of protein binding	72	0.246	0.153	0.053847
Curated gene sets:khetchoumian trim24 targets dn	7	0.61	0.379	0.053865
Curated gene sets:reactome myogenesis	28	0.385	0.24	0.053868
GO bp:go erythrocyte maturation	10	0.597	0.371	0.053967
GO mf:go n acetyltransferase activity	76	0.233	0.145	0.05408
Curated gene sets:oxford rala targets up	9	0.577	0.359	0.054149
Curated gene sets:dawson methylated in lymphoma tcl1	58	0.281	0.175	0.054385
Curated gene sets:farmer breast cancer apocrine vs luminal	308	0.108	0.0673	0.054388
Curated gene sets:pid il2 pi3k pathway	33	0.326	0.203	0.054515
GO bp:go regulation of neuronal synaptic plasticity	48	0.269	0.168	0.05473
Curated gene sets:bidus metastasis up	197	0.129	0.0803	0.054791
Curated gene sets:biocarta ngf pathway	17	0.469	0.294	0.054974
Curated gene sets:reactome gaba receptor activation	50	0.29	0.181	0.055071
Curated gene sets:bredemeyer rag signaling via atm not via nfkb up	46	0.306	0.192	0.055082
GO bp:go regulation of rna splicing	90	0.189	0.119	0.055156
GO bp:go regulation of gliogenesis	89	0.2	0.125	0.055401
GO bp:go negative regulation of axonogenesis	60	0.248	0.156	0.055426
Curated gene sets:pomeroy medulloblastoma prognosis dn	44	0.267	0.168	0.055564
Curated gene sets:kegg spliceosome	122	0.16	0.1	0.055595
Curated gene sets:maclachlan brca1 targets up	19	0.409	0.257	0.055719
GO bp:go positive regulation of neural precursor cell proliferation	42	0.266	0.167	0.05573
Curated gene sets:pid beta catenin nuc pathway	73	0.222	0.14	0.055869
GO bp:go rna methylation	52	0.25	0.157	0.055881
Curated gene sets:mikkelsen ips lcp with h3k4me3 and h3k27me3	5	0.689	0.434	0.05608
GO cc:go site of polarized growth	140	0.165	0.104	0.056242
Curated gene sets:reactome copi mediated transport	10	0.503	0.318	0.056454
GO mf:go transmembrane receptor protein phosphatase activity	16	0.52	0.328	0.056505
Curated gene sets:pid er nongenomic pathway	40	0.284	0.179	0.056563
GO mf:go alcohol transmembrane transporter activity	25	0.394	0.249	0.056746
Curated gene sets:gazin epigenetic silencing by kras	26	0.321	0.203	0.056749
GO bp:go establishment of endothelial barrier	28	0.337	0.213	0.056796
Curated gene sets:chiaradonna neoplastic transformation cdc25 dn	153	0.147	0.0929	0.056928
GO bp:go peptidyl lysine trimethylation	23	0.363	0.23	0.057033
Curated gene sets:kegg pathways in cancer	317	0.11	0.0693	0.057054
Curated gene sets:sengupta ebna1 anticorrelated	152	0.143	0.0905	0.057159
GO mf:go glutamate receptor activity	26	0.397	0.252	0.05721
GO bp:go multi organism reproductive process	814	0.0646	0.0409	0.057217
Curated gene sets:lau apoptosis cdkn2a up	55	0.246	0.156	0.057226
Curated gene sets:hu genotoxin action direct vs indirect 24hr	54	0.257	0.163	0.057272
GO cc:go dna packaging complex	100	0.271	0.172	0.057559
Curated gene sets:iwanaga e2f1 targets not induced by serum	6	0.82	0.52	0.057564
GO bp:go non recombinational repair	67	0.229	0.145	0.057601
GO bp:go mitochondrial fission	15	0.441	0.28	0.057775
Curated gene sets:ehlers aneuploidy up	40	0.283	0.18	0.057869
GO bp:go mrna processing	400	0.0876	0.0558	0.05812
Curated gene sets:chng multiple myeloma hyperploid up	52	0.233	0.149	0.058125
GO mf:go structure specific dna binding	110	0.17	0.108	0.058521
Curated gene sets:reactome g0 and early g1	24	0.402	0.257	0.058789
Curated gene sets:berenjeno transformed by rhoa forever up	20	0.415	0.265	0.058797
GO bp:go lateral ventricle development	13	0.539	0.345	0.058809
Curated gene sets:mcclung delta fosb targets 2wk	48	0.283	0.181	0.058843
GO mf:go hmg box domain binding	19	0.421	0.269	0.058929
GO mf:go frizzled binding	35	0.33	0.211	0.059227
Curated gene sets:bilanges serum sensitive via tsc2	37	0.312	0.2	0.059264
Curated gene sets:reactome chromosome maintenance	112	0.17	0.109	0.059334
Curated gene sets:kegg viral myocarditis	66	0.225	0.144	0.059412
Curated gene sets:ikeda mir30 targets dn	27	0.392	0.251	0.059446
GO bp:go cellular component morphogenesis	866	0.0642	0.0412	0.059573
GO bp:go regulation of protein deacetylation	33	0.313	0.201	0.059601
Curated gene sets:maina vhl targets dn	17	0.448	0.288	0.059637
Curated gene sets:mohankumar tlx1 targets up	398	0.0887	0.0569	0.059668
GO bp:go response to sterol	24	0.385	0.247	0.059694
GO mf:go spectrin binding	26	0.359	0.231	0.059934
Curated gene sets:vantveer breast cancer esr1 up	164	0.14	0.0901	0.06009
GO cc:go ribonucleoprotein complex	689	0.068	0.0438	0.060096
GO mf:go acetyltransferase activity	92	0.198	0.128	0.060198
GO bp:go ganglioside biosynthetic process	18	0.47	0.303	0.060247
Curated gene sets:williams esr2 targets up	28	0.331	0.213	0.060308
Curated gene sets:hoegerkorp cd44 targets direct dn	12	0.556	0.358	0.060343
Curated gene sets:shen smarca2 targets up	405	0.089	0.0573	0.060387
GO bp:go protein modification by small protein conjugation or removal	812	0.0631	0.0407	0.060463
Curated gene sets:biocarta eif4 pathway	24	0.358	0.231	0.060508
Curated gene sets:pid pi3kci akt pathway	34	0.323	0.209	0.060606
Curated gene sets:davicioni targets of pax foxo1 fusions dn	65	0.246	0.159	0.060654
Curated gene sets:schlosser serum response augmented by myc	105	0.159	0.102	0.060726
Curated gene sets:nouzova methylated in apl	61	0.241	0.155	0.060743
GO bp:go positive regulation of gene expression	1662	0.047	0.0304	0.060845
GO bp:go protein import	149	0.143	0.0922	0.060861
Curated gene sets:kegg glycosphingolipid biosynthesis ganglio series	15	0.457	0.295	0.060881
GO bp:go leydig cell differentiation	9	0.512	0.331	0.061023
Curated gene sets:peng rapamycin response dn	231	0.115	0.0743	0.061055
GO cc:go spindle microtubule	54	0.222	0.144	0.061172
GO mf:go transition metal ion binding	1314	0.0512	0.0332	0.06143
Curated gene sets:reactome norepinephrine neurotransmitter release cycle	9	0.643	0.417	0.061446
GO bp:go regulation of gene expression epigenetic	210	0.133	0.0862	0.061461
GO bp:go peptide metabolic process	538	0.0758	0.0491	0.0615
Curated gene sets:shiraishi plzf targets dn	9	0.545	0.353	0.061622
GO bp:go regulation of neuron apoptotic process	185	0.135	0.0875	0.061651
GO mf:go dioxygenase activity	79	0.192	0.125	0.061774
Curated gene sets:chin breast cancer copy number up	26	0.341	0.221	0.061845
GO bp:go protein localization to organelle	535	0.0767	0.0499	0.06204
GO bp:go metaphase plate congression	42	0.264	0.172	0.06207
Curated gene sets:reactome meiotic synapsis	69	0.249	0.162	0.062093
GO cc:go cytoplasmic stress granule	29	0.3	0.195	0.062097
GO bp:go negative regulation of transcription from rna polymerase ii promoter	702	0.0706	0.046	0.062173
Curated gene sets:chen hoxa5 targets 9hr up	218	0.123	0.0802	0.062203
GO cc:go exocytic vesicle	137	0.149	0.097	0.062229
GO mf:go transcriptional activator activity rna polymerase ii distal enhancer sequence specific binding	25	0.37	0.241	0.06223
Curated gene sets:lindgren bladder cancer cluster 3 up	307	0.102	0.0663	0.062354
GO bp:go serotonin metabolic process	10	0.539	0.351	0.062422
Curated gene sets:gutierrez multiple myeloma up	34	0.332	0.216	0.06248
GO bp:go adenylate cyclase activating dopamine receptor signaling pathway	12	0.572	0.373	0.062538
GO bp:go monocyte differentiation	15	0.442	0.288	0.062704
Curated gene sets:wang prostate cancer androgen independent	60	0.249	0.162	0.062786
Curated gene sets:mullighan npm1 mutated signature 2 up	129	0.153	0.0998	0.062839
Curated gene sets:ehrlich icf syndrom dn	13	0.465	0.304	0.062964
GO mf:go histone kinase activity	19	0.398	0.26	0.062995
GO bp:go megakaryocyte differentiation	18	0.395	0.258	0.063032
Curated gene sets:biocarta creb pathway	27	0.345	0.225	0.063048
GO mf:go histone binding	162	0.153	0.0997	0.063049
GO mf:go sterol binding	42	0.254	0.166	0.063118
GO bp:go cellular response to reactive nitrogen species	19	0.446	0.292	0.063167
Curated gene sets:yao temporal response to progesterone cluster 7	75	0.188	0.123	0.063278
GO bp:go memory	96	0.183	0.12	0.063326
GO mf:go cyclin binding	19	0.434	0.284	0.063363
GO bp:go protein localization	1729	0.0446	0.0292	0.063518
Curated gene sets:kim mycn amplification targets dn	99	0.185	0.121	0.063673
Curated gene sets:pid erb genomic pathway	14	0.487	0.32	0.063761
Curated gene sets:gratias retinoblastoma 16q24	17	0.483	0.317	0.063804
GO bp:go response to parathyroid hormone	12	0.566	0.371	0.063837
Curated gene sets:pid tcr calcium pathway	28	0.366	0.24	0.063849
Curated gene sets:pid ecadherin keratinocyte pathway	21	0.359	0.236	0.063928
Curated gene sets:hasegawa tumorigenesis by ret c634r	11	0.523	0.344	0.063961
Curated gene sets:stambolsky targets of mutated tp53 up	46	0.277	0.182	0.064011
GO cc:go hops complex	14	0.476	0.313	0.064197
GO bp:go mitotic dna integrity checkpoint	99	0.163	0.108	0.06445
GO bp:go antigen processing and presentation of peptide antigen via mhc class i	91	0.179	0.118	0.064542
GO bp:go hindlimb morphogenesis	36	0.329	0.217	0.064575
GO bp:go male gamete generation	431	0.0847	0.0558	0.064603
GO bp:go activation of mapkk activity	49	0.251	0.165	0.06473
Curated gene sets:reactome orc1 removal from chromatin	66	0.21	0.139	0.064831
GO mf:go methylated histone binding	43	0.291	0.192	0.064905
GO bp:go prepulse inhibition	12	0.557	0.368	0.064941
Curated gene sets:biocarta gleevec pathway	23	0.374	0.247	0.064954
GO bp:go negative regulation of cyclic nucleotide metabolic process	43	0.292	0.193	0.064972
Curated gene sets:reactome passive transport by aquaporins	12	0.536	0.354	0.065022
GO bp:go regulation of histone deacetylation	23	0.359	0.237	0.065048
GO cc:go golgi membrane	677	0.0689	0.0455	0.065071
GO bp:go dorsal ventral pattern formation	91	0.188	0.125	0.065271
GO mf:go hormone receptor binding	158	0.151	0.1	0.065405
Curated gene sets:wang response to gsk3 inhibitor sb216763 dn	342	0.0946	0.0626	0.065498
GO bp:go single organism behavior	372	0.0934	0.0618	0.065613
GO bp:go regulation of histone h3 k4 methylation	25	0.35	0.232	0.065865
GO bp:go patterning of blood vessels	32	0.306	0.203	0.065993
GO bp:go cell substrate junction assembly	40	0.29	0.192	0.06603
Curated gene sets:biocarta cbl pathway	12	0.536	0.356	0.066135
Curated gene sets:holleman daunorubicin b all dn	12	0.496	0.33	0.066161
Curated gene sets:reactome circadian clock	51	0.244	0.162	0.066338
GO mf:go atp dependent microtubule motor activity	17	0.427	0.285	0.066833
GO cc:go cytoplasmic mrna processing body	71	0.206	0.137	0.0669
GO bp:go dna replication	205	0.115	0.077	0.067099
GO bp:go neurotrophin signaling pathway	23	0.367	0.245	0.067188
GO mf:go scaffold protein binding	41	0.291	0.194	0.067227
GO bp:go glycerol transport	13	0.513	0.343	0.067257
GO cc:go clathrin sculpted vesicle	12	0.55	0.367	0.067298
GO bp:go erythrocyte homeostasis	70	0.208	0.139	0.067314
Curated gene sets:kegg pancreatic cancer	67	0.23	0.154	0.067411
Curated gene sets:boylan multiple myeloma c dn	55	0.248	0.166	0.067493
Curated gene sets:zhan multiple myeloma cd1 vs cd2 dn	51	0.265	0.178	0.06763
GO bp:go spindle assembly	65	0.217	0.145	0.067675
Curated gene sets:doane breast cancer classes dn	34	0.321	0.215	0.067844
Curated gene sets:reactome downregulation of tgf beta receptor signaling	21	0.371	0.249	0.067897
Curated gene sets:ehrlich icf syndrom up	11	0.603	0.405	0.067912
GO bp:go detection of temperature stimulus involved in sensory perception of pain	13	0.494	0.332	0.067937
GO bp:go detection of temperature stimulus involved in sensory perception	13	0.494	0.332	0.067937
GO bp:go regulation of dna methylation	15	0.449	0.301	0.068042
GO bp:go nose development	15	0.491	0.329	0.068154
Curated gene sets:steiner erythrocyte membrane genes	15	0.421	0.283	0.068217
GO mf:go histone methyltransferase activity	57	0.231	0.155	0.068233
Curated gene sets:reactome loss of nlp from mitotic centrosomes	54	0.236	0.158	0.068253
GO cc:go trans golgi network transport vesicle	26	0.33	0.221	0.068287
GO bp:go positive regulation of peptidyl serine phosphorylation	86	0.199	0.134	0.068315
GO bp:go glycosphingolipid biosynthetic process	25	0.384	0.258	0.068437
GO mf:go transcriptional repressor activity rna polymerase ii core promoter proximal region sequence specific binding	104	0.175	0.118	0.068543
GO bp:go mitochondrial calcium ion homeostasis	15	0.486	0.327	0.068626
GO bp:go cell division	446	0.0808	0.0544	0.06864
GO bp:go negative regulation of transferase activity	345	0.0915	0.0616	0.068647
GO bp:go regulation of steroid biosynthetic process	49	0.244	0.164	0.068704
Curated gene sets:mattioli multiple myeloma subgroups	10	0.588	0.396	0.068716
GO bp:go membrane assembly	22	0.377	0.254	0.068853
GO bp:go positive regulation of growth	225	0.116	0.0781	0.068856
Curated gene sets:schaeffer prostate development and cancer box4 up	11	0.573	0.386	0.06904
Curated gene sets:nikolsky breast cancer 6p24 p22 amplicon	21	0.523	0.353	0.069093
Curated gene sets:biocarta her2 pathway	22	0.394	0.266	0.069142
GO bp:go somite development	74	0.215	0.145	0.069143
GO bp:go membrane depolarization during action potential	38	0.29	0.195	0.069169
GO bp:go regulation of mrna splicing via spliceosome	59	0.215	0.145	0.069249
Curated gene sets:roeth tert targets dn	8	0.658	0.444	0.069306
GO bp:go antigen processing and presentation of endogenous antigen	18	0.407	0.275	0.069519
Curated gene sets:pujana breast cancer with brca1 mutated dn	9	0.708	0.479	0.069686
GO bp:go cell fate determination	43	0.264	0.179	0.069695
GO mf:go delayed rectifier potassium channel activity	35	0.303	0.205	0.069733
Curated gene sets:marks acetylated non histone proteins	14	0.428	0.29	0.069908
Curated gene sets:dacosta uv response via ercc3 dn	834	0.0643	0.0436	0.069909
Curated gene sets:mikkelsen npc hcp with h3k27me3	340	0.0981	0.0664	0.069944
GO mf:go protein serine threonine tyrosine kinase activity	38	0.265	0.18	0.070158
Curated gene sets:biocarta ccr5 pathway	17	0.439	0.298	0.070179
GO bp:go regulation of mrna metabolic process	114	0.159	0.108	0.070201
GO bp:go nuclear import	127	0.143	0.0972	0.070315
Curated gene sets:mcbryan pubertal breast 6 7wk up	187	0.126	0.0854	0.070383
GO bp:go mrna metabolic process	572	0.0695	0.0472	0.070393
GO bp:go regulation of extent of cell growth	96	0.187	0.127	0.070586
Curated gene sets:reactome traf6 mediated induction of nfkb and map kinases upon tlr7 8 or 9 activation	69	0.211	0.143	0.070595
GO bp:go regulation of translation in response to stress	18	0.389	0.265	0.070642
GO bp:go modulation of transcription in other organism involved in symbiotic interaction	22	0.39	0.265	0.070701
GO mf:go rna methyltransferase activity	44	0.253	0.172	0.070948
Curated gene sets:hwang prostate cancer markers	26	0.324	0.221	0.071002
Curated gene sets:zwang egf persistently dn	58	0.196	0.134	0.07124
Curated gene sets:reactome regulation of complement cascade	14	0.501	0.342	0.071395
GO bp:go positive regulation of cell growth	139	0.15	0.102	0.07141
GO bp:go regulation of interleukin 10 production	42	0.272	0.186	0.071697
GO bp:go regulation of actin cytoskeleton reorganization	32	0.306	0.209	0.071796
GO bp:go muscle cell cellular homeostasis	16	0.413	0.283	0.071912
GO cc:go axonal growth cone	19	0.389	0.266	0.071943
Curated gene sets:fujiwara park2 in liver cancer dn	5	0.741	0.507	0.071949
GO bp:go action potential	92	0.184	0.126	0.072383
GO bp:go cellular macromolecule localization	1180	0.0509	0.0349	0.072426
Curated gene sets:gaussmann mll af4 fusion targets a dn	88	0.187	0.128	0.072437
GO bp:go regulation of translational initiation in response to stress	13	0.436	0.299	0.072492
GO mf:go chromatin binding	410	0.0838	0.0575	0.072536
GO bp:go pentose phosphate shunt	13	0.5	0.343	0.072582
GO bp:go negative regulation of b cell apoptotic process	12	0.414	0.285	0.072811
GO bp:go positive regulation of transcription factor import into nucleus	50	0.248	0.171	0.072862
Curated gene sets:west adrenocortical tumor up	290	0.0952	0.0655	0.072922
GO mf:go receptor signaling protein serine threonine kinase activity	86	0.189	0.13	0.07294
Curated gene sets:iwanaga carcinogenesis by kras dn	114	0.155	0.107	0.072969
GO bp:go mating behavior	23	0.348	0.239	0.07299
GO bp:go multi organism reproductive behavior	23	0.348	0.239	0.07299
Curated gene sets:onken uveal melanoma dn	497	0.0764	0.0525	0.073048
GO bp:go negative regulation of telomere maintenance via telomerase	11	0.473	0.326	0.073457
GO mf:go extracellular glutamate gated ion channel activity	19	0.427	0.295	0.073638
Curated gene sets:nielsen liposarcoma up	18	0.388	0.268	0.073671
GO bp:go golgi localization	12	0.517	0.357	0.073744
GO bp:go regulation of membrane repolarization	29	0.333	0.23	0.073811
GO bp:go regulation of receptor biosynthetic process	21	0.372	0.257	0.07383
GO bp:go ras protein signal transduction	139	0.143	0.0988	0.073832
Curated gene sets:zembutsu sensitivity to nimustine	16	0.4	0.277	0.073898
Curated gene sets:korkola seminoma dn	11	0.561	0.388	0.074
Curated gene sets:zhang response to cantharidin up	18	0.427	0.296	0.074121
Curated gene sets:mense hypoxia up	93	0.181	0.125	0.074373
GO cc:go vacuole	1127	0.0519	0.036	0.074399
GO bp:go regulation of gene silencing	47	0.239	0.165	0.07443
GO mf:go 3 5 cyclic amp phosphodiesterase activity	15	0.411	0.285	0.074553
GO bp:go response to water deprivation	11	0.478	0.331	0.074617
Curated gene sets:pid ap1 pathway	69	0.203	0.141	0.074763
GO bp:go negative regulation of lymphocyte apoptotic process	26	0.295	0.205	0.074833
Curated gene sets:goering blood hdl cholesterol qtl cis	11	0.434	0.301	0.074984
GO cc:go nuclear nucleosome	34	0.341	0.237	0.075036
Curated gene sets:wnt signaling	87	0.193	0.134	0.075076
GO bp:go negative regulation of astrocyte differentiation	12	0.48	0.333	0.075096
Curated gene sets:kegg long term potentiation	66	0.205	0.143	0.075266
GO bp:go trna metabolic process	172	0.126	0.088	0.075397
Curated gene sets:coulouarn temporal tgfb1 signature dn	134	0.146	0.102	0.075484
Curated gene sets:benporath cycling genes	627	0.0665	0.0464	0.075904
Curated gene sets:reactome intrinsic pathway for apoptosis	28	0.321	0.224	0.076124
GO cc:go dna repair complex	38	0.278	0.194	0.076292
Curated gene sets:kyng response to h2o2	69	0.206	0.144	0.076346
Curated gene sets:mariadason regulated by histone acetylation dn	48	0.232	0.162	0.076357
GO bp:go parental behavior	12	0.555	0.388	0.076422
GO bp:go maternal behavior	12	0.555	0.388	0.076422
Curated gene sets:cairo hepatoblastoma poor survival	13	0.538	0.376	0.076438
Curated gene sets:iritani mad1 targets up	13	0.5	0.35	0.076529
GO bp:go establishment or maintenance of monopolar cell polarity	15	0.5	0.35	0.076655
Curated gene sets:dierick serotonin function genes	6	0.606	0.425	0.076666
Curated gene sets:turjanski mapk8 and mapk9 targets	7	0.715	0.501	0.076704
GO bp:go ceramide biosynthetic process	43	0.275	0.192	0.076714
GO bp:go embryonic heart tube morphogenesis	62	0.218	0.153	0.076829
Curated gene sets:reactome regulation of insulin secretion by glucagon like peptide1	42	0.282	0.198	0.076918
GO bp:go positive regulation of release of cytochrome c from mitochondria	28	0.309	0.217	0.077166
Curated gene sets:lim mammary luminal mature up	109	0.164	0.115	0.077396
Curated gene sets:sig cd40pathwaymap	33	0.292	0.206	0.077651
GO mf:go chromatin dna binding	75	0.187	0.132	0.077666
Curated gene sets:pid met pathway	79	0.19	0.134	0.077687
Curated gene sets:benporath nos targets	172	0.126	0.0886	0.077733
GO bp:go response to activity	69	0.2	0.141	0.077795
Curated gene sets:foster kdm1a targets dn	210	0.107	0.0756	0.077869
GO bp:go regulation of response to extracellular stimulus	168	0.124	0.0875	0.077897
GO bp:go regulation of response to nutrient levels	168	0.124	0.0875	0.077897
GO bp:go respiratory burst	12	0.478	0.337	0.078018
GO cc:go nuclear chromatin	277	0.101	0.0715	0.078053
GO mf:go transmembrane receptor protein tyrosine kinase activity	65	0.219	0.155	0.078085
GO bp:go peripheral nervous system development	69	0.21	0.148	0.078097
Curated gene sets:kegg non homologous end joining	13	0.511	0.36	0.078183
Curated gene sets:thum systolic heart failure dn	218	0.115	0.0813	0.078268
GO bp:go positive regulation of receptor biosynthetic process	10	0.504	0.356	0.078276
GO bp:go establishment of protein localization	1365	0.0462	0.0326	0.07843
GO bp:go potassium ion transport	150	0.139	0.0982	0.078721
GO bp:go regulation of histone h3 k9 methylation	17	0.398	0.282	0.07895
Curated gene sets:kegg valine leucine and isoleucine biosynthesis	10	0.43	0.305	0.079112
GO bp:go cell proliferation in forebrain	26	0.33	0.234	0.079114
GO bp:go dopamine metabolic process	20	0.373	0.264	0.079198
GO bp:go synaptonemal complex organization	20	0.361	0.257	0.079486
GO bp:go regulation of transmembrane transport	407	0.0866	0.0615	0.079541
GO bp:go regulation of cell cycle phase transition	316	0.0898	0.0638	0.079567
GO bp:go regulation of dendrite morphogenesis	67	0.221	0.157	0.079637
GO bp:go cofactor catabolic process	20	0.391	0.278	0.079687
Curated gene sets:nouzova tretinoin and h4 acetylation	134	0.134	0.0955	0.079795
Curated gene sets:pid erbb network pathway	16	0.461	0.328	0.079831
GO bp:go megakaryocyte development	15	0.406	0.289	0.079923
Curated gene sets:cairo pml targets bound by myc dn	14	0.402	0.286	0.080011
Curated gene sets:biocarta mtor pathway	23	0.328	0.234	0.080215
GO mf:go protein c terminus binding	175	0.124	0.0882	0.080269
GO bp:go positive regulation of cell substrate adhesion	96	0.165	0.118	0.080289
GO bp:go monovalent inorganic anion homeostasis	18	0.44	0.314	0.080357
Curated gene sets:flechner biopsy kidney transplant ok vs donor up	523	0.0724	0.0517	0.080566
Curated gene sets:chang core serum response dn	203	0.113	0.0805	0.080625
Curated gene sets:biocarta il7 pathway	16	0.434	0.31	0.080654
GO bp:go cellular response to inorganic substance	153	0.138	0.0989	0.080799
GO bp:go heterophilic cell cell adhesion via plasma membrane cell adhesion molecules	44	0.23	0.164	0.080966
GO bp:go response to glucagon	47	0.255	0.182	0.081035
GO bp:go camp mediated signaling	37	0.293	0.209	0.081155
GO bp:go phospholipid efflux	14	0.511	0.366	0.081239
GO bp:go peptidyl arginine modification	18	0.356	0.255	0.081353
GO bp:go positive regulation of steroid biosynthetic process	13	0.457	0.327	0.081448
GO cc:go rnai effector complex	11	0.534	0.383	0.08151
GO mf:go receptor signaling protein activity	165	0.131	0.0939	0.081573
Curated gene sets:biocarta akt pathway	20	0.399	0.286	0.081675
GO mf:go protein dimerization activity	1093	0.0517	0.0371	0.081733
Curated gene sets:iwanaga carcinogenesis by kras pten dn	340	0.0876	0.0629	0.081781
Curated gene sets:ikeda mir1 targets up	52	0.244	0.175	0.08181
GO bp:go embryonic eye morphogenesis	33	0.301	0.216	0.082075
Curated gene sets:kokkinakis methionine deprivation 96hr dn	71	0.195	0.14	0.08223
Curated gene sets:pid reelin pathway	29	0.29	0.209	0.082259
GO bp:go response to retinoic acid	106	0.165	0.119	0.082298
Curated gene sets:enk uv response keratinocyte dn	466	0.0751	0.0541	0.08232
GO bp:go cerebellar granular layer development	13	0.497	0.357	0.082324
Curated gene sets:tcga glioblastoma mutated	8	0.626	0.45	0.082465
Curated gene sets:labbe targets of tgfb1 and wnt3a up	104	0.16	0.115	0.082613
GO bp:go transcription from rna polymerase ii promoter	694	0.0627	0.0452	0.082673
GO bp:go bicarbonate transport	44	0.247	0.178	0.0827
GO mf:go carboxypeptidase activity	40	0.273	0.197	0.082797
Curated gene sets:reactome acetylcholine neurotransmitter release cycle	10	0.548	0.395	0.082897
GO bp:go glutamate receptor signaling pathway	40	0.277	0.2	0.08295
Curated gene sets:zhang tlx targets 36hr up	216	0.106	0.0768	0.082994
Curated gene sets:xu response to tretinoin and nsc682994 dn	15	0.441	0.318	0.083143
GO bp:go multi organism behavior	71	0.194	0.141	0.083198
GO mf:go protein self association	43	0.233	0.168	0.083221
Curated gene sets:davicioni rhabdomyosarcoma pax foxo1 fusion dn	15	0.442	0.319	0.08329
GO bp:go vascular endothelial growth factor signaling pathway	14	0.456	0.33	0.083316
Curated gene sets:gentile uv response cluster d2	41	0.259	0.187	0.083345
GO bp:go positive regulation of neuron death	64	0.22	0.159	0.083374
GO cc:go lumenal side of membrane	28	0.341	0.247	0.083429
GO bp:go rrna modification	24	0.329	0.238	0.083479
GO bp:go regulation of endocytosis	195	0.115	0.0832	0.083652
Curated gene sets:zhan multiple myeloma pr dn	44	0.237	0.172	0.083722
GO cc:go node of ranvier	15	0.441	0.32	0.083727
GO bp:go regulation of hematopoietic progenitor cell differentiation	40	0.261	0.189	0.083748
GO bp:go dna methylation or demethylation	55	0.218	0.158	0.083818
GO cc:go lamellipodium	167	0.125	0.0909	0.083934
GO mf:go neurotransmitter receptor activity	64	0.212	0.153	0.084083
GO bp:go response to salt stress	20	0.364	0.264	0.084122
Curated gene sets:reactome m g1 transition	77	0.17	0.124	0.084304
Curated gene sets:zeilstra cd44 targets dn	7	0.634	0.461	0.084384
GO bp:go negative regulation of autophagy	52	0.229	0.167	0.084392
GO bp:go regulation of synaptic transmission gabaergic	29	0.307	0.223	0.08449
GO bp:go protein palmitoylation	21	0.333	0.243	0.084629
GO mf:go sulfate transmembrane transporter activity	13	0.479	0.348	0.084759
GO mf:go transmembrane receptor protein kinase activity	82	0.19	0.139	0.08478
Curated gene sets:reactome metabolism of rna	249	0.0979	0.0714	0.085012
Curated gene sets:mullighan npm1 mutated signature 1 up	257	0.0976	0.0711	0.085108
GO mf:go rna cap binding	12	0.429	0.313	0.085152
Curated gene sets:biocarta shh pathway	16	0.427	0.312	0.085203
GO cc:go cell trailing edge	11	0.444	0.325	0.085453
Curated gene sets:reactome the role of nef in hiv1 replication and disease pathogenesis	26	0.301	0.22	0.085524
GO bp:go regulation of circadian rhythm	98	0.157	0.115	0.085526
Curated gene sets:reactome recruitment of mitotic centrosome proteins and complexes	61	0.204	0.149	0.085529
GO bp:go morphogenesis of an endothelium	16	0.429	0.314	0.085663
GO bp:go execution phase of apoptosis	52	0.214	0.156	0.085768
Curated gene sets:kegg rna degradation	56	0.206	0.151	0.085983
GO bp:go mitochondrial calcium ion transport	11	0.497	0.364	0.086131
Curated gene sets:plasari tgfb1 signaling via nfic 1hr dn	99	0.16	0.117	0.086187
GO bp:go positive regulation of steroid metabolic process	23	0.325	0.239	0.086291
Curated gene sets:reactome abc family proteins mediated transport	32	0.294	0.216	0.086453
Curated gene sets:molenaar targets of ccnd1 and cdk4 up	61	0.225	0.165	0.086494
Curated gene sets:su placenta	24	0.337	0.247	0.086521
GO bp:go sialylation	21	0.379	0.278	0.086522
GO mf:go sialyltransferase activity	21	0.379	0.278	0.086522
Curated gene sets:stark prefrontal cortex 22q11 deletion up	183	0.125	0.0916	0.086631
GO bp:go cellular response to zinc ion	15	0.567	0.417	0.086637
Curated gene sets:biocarta hif pathway	15	0.41	0.301	0.086667
GO cc:go nuclear periphery	110	0.158	0.116	0.086716
GO mf:go kinase regulator activity	181	0.116	0.0853	0.08672
GO bp:go positive regulation of nfat protein import into nucleus	11	0.489	0.359	0.086838
Curated gene sets:reactome tgf beta receptor signaling activates smads	24	0.32	0.235	0.087032
GO mf:go phosphoric diester hydrolase activity	87	0.163	0.12	0.087038
GO bp:go ganglion development	13	0.5	0.368	0.087049
Curated gene sets:benporath nanog targets	950	0.0528	0.0388	0.087082
GO cc:go heterochromatin	61	0.203	0.149	0.087092
GO bp:go glyceraldehyde 3 phosphate metabolic process	18	0.35	0.258	0.087131
GO bp:go glial cell differentiation	133	0.142	0.105	0.087519
Curated gene sets:reactome ppara activates gene expression	101	0.15	0.11	0.087542
Curated gene sets:liu liver cancer	33	0.289	0.213	0.087646
Curated gene sets:martoriati mdm4 targets neuroepithelium up	162	0.124	0.0912	0.087733
Curated gene sets:perez tp53 and tp63 targets	189	0.116	0.0854	0.087929
Curated gene sets:schuetz breast cancer ductal invasive dn	83	0.187	0.138	0.088037
Curated gene sets:reactome sphingolipid metabolism	61	0.202	0.149	0.088176
Curated gene sets:nguyen notch1 targets dn	84	0.178	0.131	0.088305
GO cc:go recycling endosome	124	0.134	0.0994	0.088347
GO bp:go regulation of protein homooligomerization	15	0.36	0.266	0.088375
GO mf:go protein heterodimerization activity	443	0.081	0.06	0.08847
GO bp:go cerebral cortex development	100	0.164	0.121	0.088546
Curated gene sets:biocarta arenrf2 pathway	13	0.464	0.344	0.088669
GO bp:go myelin maintenance	12	0.503	0.374	0.088957
Curated gene sets:reactome activation of kainate receptors upon glutamate binding	30	0.313	0.233	0.088972
GO bp:go positive regulation of tyrosine phosphorylation of stat5 protein	16	0.378	0.28	0.089041
GO bp:go coronary vasculature development	37	0.264	0.196	0.089129
Curated gene sets:kokkinakis methionine deprivation 48hr up	126	0.145	0.108	0.089164
GO mf:go transcription factor activity rna polymerase ii core promoter proximal region sequence specific binding	320	0.0931	0.0692	0.089214
GO bp:go canonical wnt signaling pathway	89	0.171	0.127	0.089283
Curated gene sets:reactome regulation of insulin secretion	87	0.173	0.129	0.089662
GO bp:go double strand break repair	162	0.124	0.0923	0.089816
GO cc:go spindle midzone	27	0.316	0.236	0.089829
Curated gene sets:bidus metastasis dn	150	0.126	0.0937	0.089964
Curated gene sets:gobert core oligodendrocyte differentiation	38	0.254	0.19	0.089977
GO mf:go udp glycosyltransferase activity	135	0.147	0.109	0.090032
Curated gene sets:reactome opioid signalling	77	0.188	0.14	0.09005
Curated gene sets:pid pi3k plc trk pathway	36	0.267	0.199	0.090069
GO bp:go sympathetic nervous system development	21	0.391	0.292	0.090073
Curated gene sets:biocarta nuclearrs pathway	14	0.426	0.318	0.090181
GO bp:go regulation of long term neuronal synaptic plasticity	23	0.323	0.241	0.090241
GO cc:go er to golgi transport vesicle membrane	51	0.216	0.161	0.090316
Curated gene sets:finetti breast cancers kinome gray	15	0.396	0.296	0.090373
GO bp:go glutamine family amino acid biosynthetic process	18	0.324	0.242	0.090431
Curated gene sets:reactome ctnnb1 phosphorylation cascade	15	0.394	0.294	0.090594
Curated gene sets:wang barretts esophagus and esophagus cancer up	25	0.315	0.236	0.090674
Curated gene sets:reactome signal transduction by l1	32	0.258	0.193	0.090791
GO bp:go mitotic sister chromatid segregation	89	0.167	0.125	0.090993
GO bp:go negative regulation of cellular amide metabolic process	129	0.134	0.1	0.091045
GO cc:go golgi apparatus part	855	0.0546	0.0409	0.091288
Curated gene sets:climent breast cancer copy number up	23	0.342	0.257	0.091367
GO bp:go tor signaling	16	0.329	0.247	0.091436
Curated gene sets:li induced t to natural killer dn	111	0.147	0.11	0.09152
GO bp:go cellular response to vascular endothelial growth factor stimulus	30	0.274	0.206	0.09159
Curated gene sets:biocarta ach pathway	16	0.422	0.317	0.091676
Curated gene sets:diaz chronic meylogenous leukemia up	1319	0.0429	0.0323	0.091693
GO bp:go positive regulation of potassium ion transport	36	0.286	0.215	0.091748
GO mf:go long chain fatty acid coa ligase activity	12	0.403	0.303	0.09176
GO bp:go rna dependent dna biosynthetic process	20	0.337	0.253	0.091773
GO bp:go regulation of mitotic cell cycle	457	0.0715	0.0538	0.09192
GO bp:go camera type eye morphogenesis	99	0.16	0.12	0.092054
GO bp:go negative regulation of locomotion	251	0.0982	0.0739	0.092055
GO bp:go glycoprotein metabolic process	338	0.0865	0.0652	0.092224
GO bp:go positive regulation of gene expression epigenetic	75	0.206	0.155	0.09225
Curated gene sets:reactome regulation of mrna stability by proteins that bind au rich elements	82	0.168	0.127	0.092545
Curated gene sets:provenzani metastasis dn	132	0.135	0.102	0.092589
GO bp:go regulation of axon guidance	38	0.264	0.199	0.092726
Curated gene sets:pid mapk trk pathway	33	0.263	0.199	0.092748
Curated gene sets:markey rb1 acute lof up	223	0.102	0.0767	0.092792
Curated gene sets:glinsky cancer death up	6	0.612	0.463	0.092933
GO mf:go hsp90 protein binding	25	0.314	0.237	0.092934
GO bp:go myeloid cell homeostasis	84	0.167	0.127	0.09301
GO bp:go negative regulation of telomerase activity	15	0.389	0.294	0.093106
GO bp:go regulation of protein insertion into mitochondrial membrane involved in apoptotic signaling pathway	29	0.293	0.222	0.093634
GO bp:go positive regulation of protein insertion into mitochondrial membrane involved in apoptotic signaling pathway	29	0.293	0.222	0.093634
Curated gene sets:reactome myd88 mal cascade initiated on plasma membrane	75	0.183	0.138	0.093647
GO bp:go regulation of p38mapk cascade	26	0.308	0.233	0.093698
Curated gene sets:lang myb family targets	28	0.276	0.209	0.093734
GO bp:go mitotic spindle organization	64	0.188	0.143	0.093765
GO bp:go regulation of respiratory gaseous exchange by neurological system process	11	0.53	0.402	0.09389
Curated gene sets:ivanova hematopoiesis early progenitor	506	0.0676	0.0514	0.093957
Curated gene sets:collis prkdc regulators	15	0.429	0.326	0.093967
Curated gene sets:ivanovska mir106b targets	88	0.156	0.118	0.093982
Curated gene sets:georges targets of mir192 and mir215	852	0.0528	0.0401	0.094011
Curated gene sets:piepoli lgi1 targets up	12	0.506	0.385	0.094052
GO bp:go oxidoreduction coenzyme metabolic process	100	0.156	0.118	0.094099
GO bp:go positive regulation of striated muscle cell differentiation	51	0.225	0.171	0.0941
GO bp:go histone h4 acetylation	45	0.217	0.165	0.094106
Curated gene sets:reactome aquaporin mediated transport	50	0.232	0.176	0.09421
Curated gene sets:kang fluorouracil resistance up	21	0.317	0.241	0.094342
Curated gene sets:ma pituitary fetal vs adult up	28	0.289	0.22	0.094409
GO bp:go eating behavior	30	0.273	0.208	0.09443
GO bp:go negative regulation of phosphorus metabolic process	526	0.0675	0.0514	0.094454
GO bp:go negative regulation of phosphate metabolic process	526	0.0675	0.0514	0.094454
Curated gene sets:reactome mrna processing	149	0.116	0.0887	0.094727
GO mf:go sumo binding	13	0.388	0.296	0.094765
GO bp:go dna ligation	16	0.413	0.314	0.0948
GO bp:go b cell proliferation	37	0.314	0.239	0.09485
Curated gene sets:liang hematopoiesis stem cell number qtl	17	0.346	0.264	0.09486
Curated gene sets:finetti breast cancers kinome blue	20	0.38	0.29	0.095218
Curated gene sets:reactome regulation of insulin secretion by acetylcholine	10	0.49	0.374	0.095303
GO bp:go cellular response to organic substance	1790	0.0385	0.0295	0.095438
Curated gene sets:pid arf6 downstream pathway	15	0.399	0.305	0.095541
Curated gene sets:vantveer breast cancer metastasis dn	114	0.143	0.109	0.095626
GO cc:go condensed chromosome outer kinetochore	12	0.505	0.386	0.09566
Curated gene sets:biocarta calcineurin pathway	18	0.387	0.296	0.095801
GO bp:go cytokine metabolic process	17	0.367	0.281	0.095884
Curated gene sets:teramoto opn targets cluster 1	12	0.442	0.339	0.095955
Curated gene sets:wakasugi have znf143 binding sites	57	0.185	0.142	0.095984
Curated gene sets:gaussmann mll af4 fusion targets g up	225	0.102	0.078	0.096036
GO bp:go lytic vacuole organization	52	0.212	0.163	0.096081
GO bp:go lysosome organization	52	0.212	0.163	0.096081
Curated gene sets:hernandez mitotic arrest by docetaxel 1 dn	38	0.245	0.188	0.0961
GO bp:go beta catenin tcf complex assembly	43	0.236	0.181	0.096173
GO bp:go regulation of early endosome to late endosome transport	14	0.402	0.309	0.096195
GO bp:go regulation of chromatin silencing	17	0.35	0.269	0.096243
Curated gene sets:biocarta il3 pathway	13	0.405	0.311	0.096265
Curated gene sets:demagalhaes aging dn	14	0.392	0.301	0.096371
GO bp:go membrane biogenesis	27	0.294	0.226	0.096394
Curated gene sets:jiang hypoxia normal	294	0.0882	0.0677	0.09646
GO bp:go substrate independent telencephalic tangential interneuron migration	12	0.452	0.347	0.09648
GO bp:go substrate independent telencephalic tangential migration	12	0.452	0.347	0.09648
GO bp:go regulation of keratinocyte proliferation	27	0.289	0.222	0.096686
Curated gene sets:murakami uv response 6hr up	36	0.245	0.188	0.096985
GO cc:go glycoprotein complex	19	0.354	0.273	0.097062
Curated gene sets:aston major depressive disorder up	45	0.221	0.17	0.097204
Curated gene sets:heidenblad amplified in soft tissue cancer	13	0.447	0.345	0.097256
GO cc:go neuron projection terminus	120	0.141	0.108	0.097272
GO cc:go endosomal part	408	0.0752	0.058	0.097386
Curated gene sets:pid tgfbr pathway	54	0.209	0.162	0.097478
GO bp:go cellular response to electrical stimulus	14	0.392	0.303	0.097561
GO bp:go protein acylation	142	0.124	0.0959	0.097582
Curated gene sets:biocarta igf1r pathway	23	0.328	0.254	0.097994
Curated gene sets:kuninger igf1 vs pdgfb targets up	79	0.16	0.124	0.098007
GO cc:go dna replication factor a complex	14	0.343	0.265	0.098014
GO bp:go sulfate transport	14	0.439	0.34	0.098202
GO bp:go mrna transcription	20	0.351	0.272	0.098206
GO cc:go plasma membrane region	891	0.0535	0.0414	0.098248
GO mf:go carbon nitrogen ligase activity with glutamine as amido n donor	11	0.408	0.316	0.098267
GO bp:go protein localization to synapse	15	0.411	0.319	0.098452
GO bp:go mismatch repair	27	0.242	0.188	0.098535
Curated gene sets:shipp dlbcl cured vs fatal dn	40	0.227	0.176	0.098601
Curated gene sets:mikkelsen ips with hcp h3k27me3	98	0.159	0.123	0.098613
GO mf:go peptide n acetyltransferase activity	59	0.222	0.172	0.09865
GO bp:go striatum development	15	0.361	0.28	0.098681
Curated gene sets:kegg inositol phosphate metabolism	53	0.215	0.166	0.098774
Curated gene sets:smid breast cancer relapse in brain up	35	0.243	0.189	0.098833
Curated gene sets:midorikawa amplified in liver cancer	53	0.254	0.197	0.098884
GO mf:go extracellular ligand gated ion channel activity	67	0.205	0.159	0.098963
GO cc:go nuclear envelope	400	0.075	0.0583	0.099011
GO cc:go recycling endosome membrane	36	0.231	0.179	0.099021
GO bp:go leukocyte degranulation	30	0.276	0.215	0.099049
Curated gene sets:kang doxorubicin resistance dn	18	0.363	0.283	0.09933
Curated gene sets:weigel oxidative stress by hne and h2o2	36	0.266	0.207	0.099535
Curated gene sets:reactome mitotic g1 g1 s phases	129	0.129	0.101	0.099665
Curated gene sets:schlosser serum response up	126	0.129	0.1	0.099816
Curated gene sets:vandesluis commd1 targets group 3 dn	37	0.23	0.179	0.099861
Curated gene sets:reactome integration of energy metabolism	113	0.144	0.113	0.099884
GO bp:go regulation of telomerase activity	42	0.218	0.17	0.0999
Curated gene sets:bakker foxo3 targets up	58	0.191	0.149	0.099908
GO mf:go gated channel activity	304	0.09	0.0703	0.099961
GO bp:go protein peptidyl prolyl isomerization	37	0.239	0.187	0.099985
Curated gene sets:kyng dna damage up	213	0.103	0.0801	0.099993
Curated gene sets:zhang breast cancer progenitors up	407	0.0739	0.0576	0.10003
GO cc:go endoplasmic reticulum golgi intermediate compartment	101	0.15	0.117	0.10018
GO bp:go positive regulation of cell size	12	0.48	0.375	0.1003
GO mf:go lrr domain binding	17	0.395	0.309	0.10047
Curated gene sets:ozen mir125b1 targets	24	0.319	0.25	0.10052
Curated gene sets:dairkee tert targets up	351	0.0747	0.0584	0.10057
GO cc:go microbody	130	0.124	0.0967	0.10057
Curated gene sets:ramjaun apoptosis by tgfb1 via mapk1 up	6	0.598	0.468	0.1008
Curated gene sets:li induced t to natural killer up	297	0.0866	0.0679	0.10089
GO mf:go adenosine deaminase activity	11	0.406	0.318	0.10095
Curated gene sets:inamura lung cancer scc subtypes dn	5	0.681	0.534	0.10097
GO bp:go transmission of nerve impulse	54	0.218	0.171	0.10105
GO bp:go regulation of neuron death	243	0.0971	0.0762	0.10115
GO bp:go establishment of localization in cell	1603	0.0388	0.0304	0.10124
GO cc:go phosphatidylinositol 3 kinase complex	20	0.375	0.294	0.10143
GO bp:go response to ether	11	0.43	0.338	0.10148
GO mf:go anion transmembrane transporting atpase activity	11	0.487	0.382	0.10151
GO bp:go ventral spinal cord development	46	0.246	0.193	0.10159
Curated gene sets:reactome nuclear receptor transcription pathway	44	0.234	0.184	0.10172
GO bp:go negative regulation of neuron differentiation	183	0.112	0.0883	0.10178
GO bp:go regulation of dna biosynthetic process	90	0.152	0.119	0.10203
GO cc:go neuron projection membrane	36	0.272	0.214	0.10206
GO bp:go response to carbohydrate	165	0.113	0.0893	0.10231
GO bp:go primitive streak formation	10	0.538	0.424	0.10248
Curated gene sets:turjanski mapk11 targets	4	0.862	0.681	0.10277
GO mf:go ephrin receptor activity	20	0.337	0.266	0.10294
Curated gene sets:ginestier breast cancer znf217 amplified up	72	0.174	0.138	0.10304
GO mf:go transmitter gated channel activity	23	0.344	0.272	0.1031
Curated gene sets:wang response to forskolin dn	9	0.528	0.419	0.10342
GO bp:go cytosolic transport	205	0.106	0.0841	0.10345
GO bp:go meiotic cell cycle process	146	0.117	0.0931	0.10348
GO bp:go polyol transport	19	0.354	0.281	0.10366
GO bp:go oligosaccharide catabolic process	12	0.353	0.28	0.10367
GO cc:go potassium channel complex	88	0.162	0.128	0.10377
GO bp:go mesoderm development	108	0.144	0.114	0.10395
Curated gene sets:zhan multiple myeloma dn	39	0.247	0.197	0.10404
Curated gene sets:tseng irs1 targets dn	124	0.132	0.105	0.10406
Curated gene sets:nick response to proc treatment up	5	0.494	0.393	0.10416
GO bp:go negative regulation of gene silencing	16	0.346	0.275	0.10418
GO bp:go t cell differentiation involved in immune response	26	0.283	0.225	0.10427
Curated gene sets:kaab heart atrium vs ventricle up	234	0.0974	0.0775	0.10428
GO cc:go nuclear transcriptional repressor complex	20	0.348	0.277	0.10436
GO bp:go intracellular estrogen receptor signaling pathway	20	0.362	0.288	0.10442
GO mf:go adenylyltransferase activity	24	0.304	0.242	0.10442
GO bp:go signal peptide processing	22	0.311	0.248	0.1046
GO bp:go negative regulation of nervous system development	252	0.0952	0.0759	0.10476
GO bp:go female sex differentiation	111	0.142	0.113	0.10488
Curated gene sets:harris brain cancer progenitors	41	0.242	0.193	0.10534
GO bp:go long chain fatty acid metabolic process	83	0.152	0.122	0.10534
GO bp:go negative regulation of potassium ion transmembrane transporter activity	16	0.394	0.315	0.10537
Curated gene sets:reactome hdl mediated lipid transport	14	0.405	0.324	0.10557
GO bp:go atp dependent chromatin remodeling	71	0.167	0.134	0.10561
GO mf:go ephrin receptor binding	24	0.314	0.251	0.10574
Curated gene sets:kaposi liver cancer met dn	6	0.657	0.526	0.10575
GO mf:go macromolecular complex binding	1342	0.0412	0.033	0.10578
GO mf:go passive transmembrane transporter activity	435	0.0739	0.0592	0.10583
GO bp:go nucleoside phosphate catabolic process	68	0.17	0.136	0.10606
Curated gene sets:chemnitz response to prostaglandin e2 up	135	0.121	0.0971	0.10639
GO bp:go regulation of receptor activity	113	0.152	0.122	0.10639
GO bp:go trophectodermal cell differentiation	14	0.337	0.271	0.10645
GO bp:go negative regulation of gliogenesis	36	0.261	0.21	0.10661
Curated gene sets:jiang aging cerebral cortex up	35	0.258	0.207	0.10669
Curated gene sets:gaussmann mll af4 fusion targets d dn	9	0.483	0.388	0.10677
GO bp:go polysaccharide biosynthetic process	41	0.232	0.186	0.10687
Curated gene sets:riz erythroid differentiation 6hr	40	0.236	0.19	0.10714
GO bp:go positive regulation of histone methylation	32	0.271	0.219	0.10719
GO bp:go negative regulation of synaptic transmission	57	0.196	0.158	0.10729
GO bp:go thymus development	47	0.223	0.179	0.10735
Curated gene sets:kim all disorders calb1 corr up	521	0.0636	0.0513	0.10741
GO bp:go establishment of protein localization to organelle	346	0.0775	0.0625	0.10741
GO bp:go neurotrophin trk receptor signaling pathway	15	0.375	0.302	0.10751
Curated gene sets:bruno hematopoiesis	64	0.172	0.139	0.10763
Curated gene sets:biocarta bcellsurvival pathway	15	0.376	0.303	0.10764
Curated gene sets:reactome telomere maintenance	73	0.174	0.14	0.10777
GO cc:go vacuolar proton transporting v type atpase complex	15	0.317	0.256	0.10787
Curated gene sets:reactome signaling by notch3	12	0.427	0.345	0.10789
Curated gene sets:reactome synthesis of dna	90	0.141	0.114	0.10795
GO bp:go cellular water homeostasis	14	0.41	0.331	0.10805
Curated gene sets:matzuk central for female fertility	29	0.268	0.217	0.10806
Curated gene sets:kegg erbb signaling pathway	86	0.162	0.131	0.10825
GO bp:go paraxial mesoderm development	16	0.358	0.29	0.10856
GO cc:go nuclear inclusion body	12	0.43	0.348	0.10866
GO bp:go epithelial cell differentiation involved in kidney development	23	0.301	0.244	0.10876
Curated gene sets:lee early t lymphocyte up	98	0.141	0.115	0.10893
GO bp:go central nervous system neuron development	65	0.195	0.159	0.10897
Curated gene sets:osman bladder cancer up	383	0.0719	0.0584	0.10899
GO bp:go negative regulation of innate immune response	37	0.223	0.181	0.1093
GO bp:go regulation of dna templated transcription elongation	42	0.213	0.173	0.10931
Curated gene sets:riz erythroid differentiation hemgn	31	0.249	0.203	0.10932
Curated gene sets:kegg leishmania infection	66	0.176	0.143	0.10939
GO bp:go muscle cell migration	19	0.311	0.253	0.10941
GO bp:go adult walking behavior	31	0.267	0.217	0.10969
GO bp:go walking behavior	31	0.267	0.217	0.10969
GO mf:go g protein coupled amine receptor activity	46	0.231	0.188	0.1098
Curated gene sets:fortschegger phf8 targets up	253	0.0915	0.0745	0.10992
GO bp:go creatine metabolic process	10	0.417	0.34	0.10993
Curated gene sets:reactome cell cycle checkpoints	112	0.126	0.103	0.11007
GO mf:go fibroblast growth factor receptor binding	27	0.282	0.23	0.11008
GO bp:go positive regulation of mitochondrial outer membrane permeabilization involved in apoptotic signaling pathway	36	0.243	0.198	0.11012
GO bp:go regulation of myeloid cell differentiation	178	0.114	0.0932	0.11024
Curated gene sets:holleman vincristine resistance b all up	37	0.235	0.192	0.1103
GO bp:go regulation of telomere maintenance	62	0.171	0.14	0.11032
GO cc:go presynaptic active zone	27	0.309	0.252	0.11032
GO bp:go negative regulation of dna replication	51	0.179	0.146	0.11051
Curated gene sets:chesler brain highest expression	35	0.241	0.197	0.11064
GO mf:go intramolecular oxidoreductase activity	53	0.196	0.161	0.11089
GO bp:go histone exchange	51	0.193	0.158	0.11097
GO bp:go regulation of microtubule based process	231	0.0931	0.0763	0.11108
Curated gene sets:rickman metastasis dn	253	0.0894	0.0732	0.11109
Curated gene sets:mariadason response to butyrate sulindac 6	48	0.201	0.165	0.11122
Curated gene sets:reactome regulation of apoptosis	56	0.183	0.15	0.11126
Curated gene sets:lu aging brain dn	145	0.116	0.0955	0.11135
Curated gene sets:pramoonjago sox4 targets up	50	0.21	0.172	0.11136
Curated gene sets:welcsh brca1 targets up	190	0.103	0.0842	0.11142
Curated gene sets:ting silenced by dicer	30	0.268	0.22	0.11152
Curated gene sets:reactome e2f enabled inhibition of pre replication complex formation	10	0.498	0.409	0.11167
GO mf:go gaba receptor binding	15	0.409	0.336	0.11169
Curated gene sets:vanoevelen myogenesis sin3a targets	217	0.0917	0.0754	0.11181
GO bp:go fatty acid beta oxidation using acyl coa dehydrogenase	18	0.31	0.255	0.11203
GO bp:go positive regulation of interleukin 10 production	28	0.274	0.225	0.11205
GO bp:go regulation of mitophagy	41	0.218	0.179	0.11216
Curated gene sets:biocarta wnt pathway	26	0.289	0.238	0.11239
GO bp:go regulation of cellular ph	76	0.159	0.131	0.1124
GO bp:go sertoli cell development	14	0.352	0.291	0.11268
Curated gene sets:heller hdac targets dn	278	0.0863	0.0712	0.11269
GO bp:go oligodendrocyte development	32	0.261	0.215	0.11271
Curated gene sets:croonquist nras vs stromal stimulation dn	96	0.143	0.118	0.11293
GO bp:go regulation of sprouting angiogenesis	26	0.264	0.218	0.11298
GO bp:go sphingolipid biosynthetic process	77	0.174	0.143	0.11299
Curated gene sets:biocarta tcr pathway	43	0.228	0.188	0.1131
Curated gene sets:biocarta rarrxr pathway	15	0.408	0.337	0.11329
Curated gene sets:kegg cell adhesion molecules cams	124	0.128	0.106	0.11338
GO mf:go neuropeptide binding	22	0.329	0.273	0.11342
GO bp:go epithelial cell cell adhesion	14	0.386	0.32	0.11344
GO bp:go regulation of cellular extravasation	22	0.281	0.233	0.11346
GO bp:go camp catabolic process	14	0.353	0.292	0.11354
Curated gene sets:lamb ccnd1 targets	18	0.313	0.26	0.11367
Curated gene sets:whiteside cisplatin resistance up	11	0.426	0.353	0.11368
Curated gene sets:theodorou mammary tumorigenesis	29	0.268	0.222	0.11389
GO bp:go lymphangiogenesis	11	0.412	0.342	0.11402
GO mf:go nucleoside diphosphate kinase activity	17	0.351	0.291	0.11407
Curated gene sets:riggins tamoxifen resistance up	57	0.186	0.154	0.11413
GO bp:go protein n linked glycosylation	74	0.17	0.141	0.1143
Curated gene sets:pedersen metastasis by erbb2 isoform 3	18	0.315	0.262	0.11439
GO bp:go positive regulation of biosynthetic process	1729	0.036	0.03	0.11455
GO cc:go intercellular bridge	44	0.223	0.185	0.11456
Curated gene sets:xu gh1 autocrine targets dn	131	0.125	0.104	0.11459
Curated gene sets:liu topbp1 targets	14	0.357	0.297	0.11469
GO bp:go neural nucleus development	61	0.188	0.156	0.11474
GO bp:go negative regulation of phosphorylation	408	0.0694	0.0578	0.11478
GO bp:go protein localization to centrosome	17	0.332	0.276	0.1148
GO bp:go axon regeneration	22	0.327	0.273	0.11509
GO bp:go negative regulation of transcription elongation from rna polymerase ii promoter	11	0.387	0.323	0.11519
GO bp:go organelle fission	479	0.0624	0.052	0.11519
GO bp:go detection of other organism	17	0.372	0.311	0.11521
GO cc:go cell projection part	904	0.0484	0.0403	0.11524
GO bp:go regulation of monocyte differentiation	14	0.434	0.362	0.11527
GO bp:go nucleobase containing compound transport	181	0.0985	0.0822	0.11536
GO bp:go guanosine containing compound biosynthetic process	14	0.337	0.282	0.11552
Curated gene sets:reactome unfolded protein response	74	0.155	0.13	0.11553
GO bp:go rrna containing ribonucleoprotein complex export from nucleus	11	0.417	0.348	0.11556
GO bp:go gmp metabolic process	16	0.32	0.267	0.11559
GO bp:go female meiotic division	25	0.272	0.227	0.11572
GO bp:go synaptic vesicle cycle	86	0.152	0.127	0.11579
GO bp:go peptidyl arginine methylation	14	0.321	0.268	0.11588
Curated gene sets:faelt b cll with vh3 21 dn	45	0.204	0.171	0.11593
GO bp:go protein import into peroxisome matrix	12	0.384	0.322	0.11593
Curated gene sets:reactome fatty acid triacylglycerol and ketone body metabolism	163	0.103	0.0865	0.11603
GO cc:go spliceosomal complex	164	0.104	0.0869	0.11605
Curated gene sets:de yy1 targets dn	89	0.15	0.125	0.11613
GO bp:go negative regulation of cyclin dependent protein kinase activity	32	0.232	0.195	0.11633
Curated gene sets:tooker gemcitabine resistance dn	119	0.134	0.113	0.11683
GO bp:go homeostasis of number of cells within a tissue	29	0.251	0.211	0.1169
GO bp:go dopamine receptor signaling pathway	28	0.267	0.224	0.11691
GO mf:go polyol transmembrane transporter activity	16	0.366	0.308	0.11754
GO bp:go vacuole fusion	24	0.282	0.238	0.11783
Curated gene sets:kegg mtor signaling pathway	50	0.195	0.165	0.11784
GO mf:go leucine zipper domain binding	11	0.455	0.385	0.11827
Curated gene sets:weigel oxidative stress by tbh and h2o2	36	0.205	0.173	0.11856
Curated gene sets:rampon enriched learning environment late up	22	0.28	0.237	0.11866
Curated gene sets:biocarta nfat pathway	53	0.18	0.152	0.11872
GO mf:go phosphatase activator activity	11	0.425	0.36	0.11879
Curated gene sets:biocarta tff pathway	21	0.292	0.247	0.11896
Curated gene sets:zembutsu sensitivity to fluorouracil	13	0.366	0.31	0.11904
Curated gene sets:martens tretinoin response dn	761	0.051	0.0432	0.11929
Curated gene sets:zhan multiple myeloma hp up	43	0.2	0.17	0.1193
GO bp:go regulation of histone phosphorylation	13	0.373	0.317	0.11931
GO cc:go t tubule	45	0.22	0.186	0.11932
GO cc:go coated vesicle	223	0.0951	0.0807	0.11934
Curated gene sets:chang pou5f1 targets dn	8	0.494	0.419	0.1195
Curated gene sets:myllykangas amplification hot spot 5	5	0.656	0.558	0.11965
GO bp:go cellular senescence	31	0.242	0.206	0.1197
GO bp:go positive regulation of telomere maintenance via telomere lengthening	32	0.22	0.187	0.11987
Curated gene sets:zwang class 1 transiently induced by egf	469	0.0648	0.0552	0.12004
GO bp:go positive regulation of receptor internalization	24	0.292	0.248	0.12008
Curated gene sets:holleman prednisolone resistance all up	19	0.278	0.237	0.12019
GO bp:go peptide catabolic process	24	0.279	0.238	0.1202
GO cc:go transcription elongation factor complex	49	0.209	0.178	0.12021
GO bp:go chromosome localization	61	0.167	0.143	0.12028
GO cc:go prespliceosome	21	0.28	0.238	0.12034
Curated gene sets:lee aging muscle up	42	0.202	0.172	0.12042
GO bp:go regulation of defense response to virus by virus	28	0.248	0.211	0.12045
Curated gene sets:pid mtor 4pathway	67	0.163	0.139	0.12049
GO cc:go outer membrane	178	0.0985	0.0841	0.12075
GO bp:go receptor clustering	39	0.206	0.176	0.12083
GO mf:go single stranded rna binding	63	0.148	0.127	0.12086
Curated gene sets:perez tp63 targets	333	0.0755	0.0645	0.12102
Curated gene sets:kinsey targets of ewsr1 flii fusion up	1214	0.0402	0.0343	0.12105
GO bp:go regulation of double strand break repair via homologous recombination	18	0.287	0.245	0.1214
Curated gene sets:zhang tlx targets dn	86	0.139	0.119	0.12156
Curated gene sets:liao metastasis	497	0.0606	0.0519	0.12164
Curated gene sets:geiss response to dsrna up	35	0.232	0.198	0.12167
Curated gene sets:pid ps1 pathway	45	0.212	0.181	0.12172
GO bp:go corpus callosum development	11	0.482	0.413	0.12183
Curated gene sets:yih response to arsenite c2	18	0.335	0.288	0.12192
Curated gene sets:kegg mismatch repair	22	0.232	0.199	0.12199
Curated gene sets:hoelzel nf1 targets dn	102	0.144	0.124	0.12209
Curated gene sets:reactome abca transporters in lipid homeostasis	16	0.378	0.325	0.12241
GO mf:go estrogen receptor binding	39	0.24	0.207	0.12243
Curated gene sets:lee targets of ptch1 and sufu dn	79	0.161	0.138	0.12257
GO bp:go lipid phosphorylation	97	0.15	0.129	0.12265
Curated gene sets:reactome toll receptor cascades	107	0.137	0.118	0.12272
Curated gene sets:pid fra pathway	36	0.249	0.215	0.12283
GO bp:go cellular monovalent inorganic cation homeostasis	96	0.137	0.118	0.12283
Curated gene sets:biocarta mef2d pathway	18	0.322	0.277	0.12297
GO bp:go anatomical structure arrangement	16	0.376	0.324	0.12303
GO bp:go regulation of ion transport	566	0.0602	0.0519	0.12305
Curated gene sets:reactome potassium channels	97	0.144	0.124	0.12318
GO bp:go posttranscriptional regulation of gene expression	438	0.0642	0.0554	0.12331
GO bp:go negative regulation of smooth muscle cell migration	16	0.355	0.306	0.12332
GO bp:go cell junction assembly	124	0.12	0.104	0.12361
Curated gene sets:liu cmyb targets dn	7	0.511	0.442	0.12365
GO bp:go regulation of chromatin binding	17	0.329	0.284	0.12366
Curated gene sets:biocarta insulin pathway	21	0.276	0.239	0.12399
GO mf:go intronic transcription regulatory region dna binding	12	0.352	0.305	0.12419
GO bp:go synapsis	36	0.225	0.195	0.12422
GO mf:go dopamine receptor binding	17	0.335	0.29	0.12423
GO cc:go er to golgi transport vesicle	65	0.165	0.143	0.12433
GO bp:go negative regulation of dendrite development	26	0.288	0.25	0.12436
GO bp:go response to ammonium ion	51	0.196	0.17	0.12459
GO mf:go glutamate receptor binding	35	0.229	0.199	0.12465
Curated gene sets:chang immortalized by hpv31 up	76	0.165	0.143	0.1247
GO bp:go regulation of wnt signaling pathway	304	0.0785	0.0682	0.1247
Curated gene sets:borczuk malignant mesothelioma up	281	0.0772	0.0672	0.12508
GO bp:go positive regulation of potassium ion transmembrane transporter activity	16	0.365	0.318	0.1252
Curated gene sets:zhang tlx targets up	106	0.134	0.117	0.12527
Curated gene sets:cromer metastasis up	64	0.161	0.14	0.12543
GO mf:go water transmembrane transporter activity	15	0.37	0.322	0.12553
Curated gene sets:shi sparc targets up	24	0.27	0.235	0.12555
Curated gene sets:biocarta cdc42rac pathway	16	0.32	0.279	0.12558
Curated gene sets:pid p73pathway	78	0.147	0.128	0.12576
GO cc:go microtubule organizing center	603	0.0541	0.0472	0.12584
Curated gene sets:heidenblad amplified in pancreatic cancer	31	0.24	0.21	0.12586
GO bp:go membrane lipid metabolic process	176	0.103	0.0901	0.12602
Curated gene sets:biocarta pyk2 pathway	28	0.254	0.221	0.12606
GO bp:go response to potassium ion	14	0.427	0.373	0.12618
Curated gene sets:reactome fatty acyl coa biosynthesis	17	0.347	0.303	0.12625
GO bp:go regulation of organelle organization	1122	0.0408	0.0357	0.12635
GO mf:go transcriptional repressor activity rna polymerase ii transcription regulatory region sequence specific binding	164	0.108	0.0943	0.1264
Curated gene sets:mcclung creb1 targets up	97	0.142	0.125	0.12642
GO bp:go neuropeptide signaling pathway	91	0.148	0.129	0.12647
GO bp:go regulation of tyrosine phosphorylation of stat5 protein	20	0.291	0.254	0.12652
GO cc:go nuclear matrix	88	0.148	0.129	0.12653
GO cc:go intrinsic component of golgi membrane	56	0.179	0.157	0.12661
Curated gene sets:pid smad2 3nuclear pathway	77	0.165	0.144	0.12668
Curated gene sets:watanabe ulcerative colitis with cancer dn	13	0.334	0.293	0.12682
GO cc:go nuclear pore	75	0.143	0.125	0.12708
Curated gene sets:su thymus	18	0.309	0.271	0.12728
Curated gene sets:hahtola mycosis fungoides cd4 dn	110	0.124	0.109	0.12729
Curated gene sets:biocarta carm1 pathway	13	0.443	0.389	0.12751
GO bp:go meiotic cell cycle	178	0.0996	0.0875	0.12755
GO bp:go organelle inheritance	11	0.403	0.354	0.12759
GO mf:go lipoprotein particle receptor binding	22	0.27	0.238	0.12793
GO bp:go negative regulation of endocytosis	38	0.201	0.178	0.12822
Curated gene sets:st wnt beta catenin pathway	34	0.237	0.209	0.12838
Curated gene sets:benporath prc2 targets	607	0.0588	0.0518	0.12849
GO bp:go positive regulation of catecholamine secretion	14	0.326	0.288	0.12857
GO bp:go high density lipoprotein particle remodeling	15	0.368	0.325	0.12857
GO bp:go strand displacement	26	0.28	0.247	0.12862
GO bp:go negative regulation of organelle organization	361	0.0691	0.0611	0.12877
Curated gene sets:ikeda mir133 targets dn	8	0.544	0.48	0.1288
GO bp:go negative regulation of hormone secretion	73	0.155	0.137	0.12896
Curated gene sets:jaatinen hematopoietic stem cell up	287	0.081	0.0717	0.12918
GO bp:go motor neuron axon guidance	26	0.296	0.262	0.12921
Curated gene sets:biocarta raccycd pathway	25	0.257	0.228	0.12924
Curated gene sets:reactome removal of the flap intermediate from the c strand	10	0.292	0.258	0.12938
GO bp:go protein localization to cytoskeleton	28	0.23	0.203	0.12954
GO bp:go trna processing	110	0.121	0.108	0.12971
GO bp:go response to cold	41	0.214	0.19	0.12985
Curated gene sets:singh nfe2l2 targets	14	0.31	0.275	0.12987
GO bp:go ribosome assembly	49	0.18	0.16	0.12998
Curated gene sets:biocarta mapk pathway	83	0.149	0.132	0.13008
Curated gene sets:reactome signaling by notch2	12	0.379	0.337	0.13035
GO mf:go aspartic type peptidase activity	24	0.278	0.247	0.1304
GO bp:go cellular response to abiotic stimulus	250	0.0803	0.0715	0.13054
Curated gene sets:biocarta rac1 pathway	23	0.271	0.241	0.13068
Curated gene sets:sa g1 and s phases	15	0.33	0.294	0.13069
Curated gene sets:biocarta gh pathway	27	0.248	0.221	0.13076
GO mf:go intramolecular oxidoreductase activity transposing c c bonds	12	0.41	0.366	0.13083
Curated gene sets:reactome activation of nmda receptor upon glutamate binding and postsynaptic events	33	0.236	0.21	0.13084
GO bp:go regulation of lipid kinase activity	50	0.198	0.176	0.13093
Curated gene sets:wang tumor invasiveness dn	203	0.0888	0.0792	0.13101
Curated gene sets:biocarta epo pathway	17	0.342	0.305	0.13107
Curated gene sets:yague pretumor drug resistance up	7	0.509	0.454	0.13133
Curated gene sets:engelmann cancer progenitors up	47	0.201	0.18	0.13171
Curated gene sets:bonome ovarian cancer poor survival dn	22	0.249	0.223	0.13174
Curated gene sets:kegg acute myeloid leukemia	55	0.186	0.166	0.13192
Curated gene sets:mccollum geldanamycin resistance up	10	0.433	0.387	0.13199
Curated gene sets:marson bound by e2f4 unstimulated	708	0.0506	0.0453	0.13204
GO bp:go positive regulation of cellular component biogenesis	386	0.065	0.0582	0.13212
GO bp:go regulation of cellular response to hypoxia	10	0.344	0.308	0.13217
Curated gene sets:wallace prostate cancer race dn	76	0.145	0.13	0.13231
Curated gene sets:kobayashi egfr signaling 6hr dn	18	0.293	0.263	0.13241
GO bp:go divalent inorganic anion homeostasis	12	0.427	0.383	0.13252
Curated gene sets:hummerich malignant skin tumor dn	18	0.32	0.287	0.13256
GO bp:go fatty acid metabolic process	287	0.075	0.0673	0.13264
Curated gene sets:pid il8 cxcr1 pathway	28	0.234	0.21	0.13265
GO bp:go response to low density lipoprotein particle	14	0.35	0.314	0.13269
GO bp:go dna methylation	43	0.196	0.176	0.13279
GO bp:go dna alkylation	43	0.196	0.176	0.13279
Curated gene sets:reactome p53 dependent g1 dna damage response	54	0.168	0.151	0.13283
Curated gene sets:rosty cervical cancer proliferation cluster	137	0.104	0.0936	0.13296
GO bp:go regulation of histone methylation	53	0.178	0.16	0.13307
Curated gene sets:biocarta mal pathway	19	0.277	0.249	0.13313
Curated gene sets:st g alpha i pathway	36	0.219	0.197	0.13341
GO bp:go negative regulation of cellular catabolic process	150	0.106	0.0958	0.13341
Curated gene sets:rashi response to ionizing radiation 1	43	0.2	0.181	0.13342
GO bp:go regulation of behavior	65	0.163	0.147	0.1336
GO bp:go enteric nervous system development	11	0.417	0.376	0.13375
Curated gene sets:park hsc vs multipotent progenitors up	17	0.328	0.296	0.13381
GO bp:go developmental induction	27	0.242	0.219	0.13418
GO bp:go myelin assembly	17	0.365	0.33	0.13432
GO mf:go protein kinase activity	612	0.0533	0.0482	0.13455
Curated gene sets:heller hdac targets silenced by methylation dn	265	0.079	0.0715	0.13466
GO bp:go chromosome organization involved in meiotic cell cycle	49	0.192	0.173	0.1347
GO bp:go amide biosynthetic process	482	0.0569	0.0516	0.13489
GO bp:go regulation of b cell apoptotic process	17	0.263	0.238	0.13501
GO bp:go regulation of ph	87	0.137	0.124	0.13528
Curated gene sets:kegg basal cell carcinoma	55	0.179	0.163	0.1353
GO bp:go synaptic vesicle recycling	22	0.287	0.261	0.13555
GO bp:go gene silencing	199	0.097	0.0882	0.13557
Curated gene sets:begum targets of pax3 foxo1 fusion and pax3	7	0.552	0.501	0.13567
Curated gene sets:terao aox4 targets hg up	28	0.252	0.229	0.13581
GO bp:go vitamin biosynthetic process	14	0.319	0.29	0.13606
Curated gene sets:dacosta uv response via ercc3 ttd up	58	0.169	0.154	0.13618
Curated gene sets:pid p38 mk2 pathway	21	0.281	0.257	0.13634
GO bp:go cellular response to nitric oxide	15	0.365	0.333	0.13635
GO cc:go cell division site	51	0.164	0.15	0.13647
Curated gene sets:medina smarca4 targets	42	0.202	0.184	0.13654
GO bp:go regulation of neuron projection regeneration	20	0.301	0.275	0.13693
Curated gene sets:reactome glucagon signaling in metabolic regulation	33	0.25	0.229	0.13707
GO mf:go cis trans isomerase activity	39	0.199	0.182	0.13711
GO bp:go dna replication dependent nucleosome organization	32	0.289	0.264	0.13716
GO bp:go dna replication dependent nucleosome assembly	32	0.289	0.264	0.13716
GO bp:go ventral spinal cord interneuron differentiation	17	0.345	0.316	0.13724
GO bp:go rna catabolic process	220	0.0843	0.0772	0.13728
Curated gene sets:gobert oligodendrocyte differentiation up	555	0.0528	0.0483	0.13734
GO bp:go negative regulation of neural precursor cell proliferation	21	0.256	0.235	0.13734
Curated gene sets:kegg snare interactions in vesicular transport	36	0.2	0.183	0.13744
Curated gene sets:noushmehr gbm germline mutated	7	0.501	0.459	0.13751
Curated gene sets:biocarta egf pathway	30	0.245	0.225	0.13776
GO bp:go negative regulation of neurological system process	15	0.327	0.3	0.13781
Curated gene sets:wang response to gsk3 inhibitor sb216763 up	342	0.0692	0.0635	0.13783
GO bp:go positive regulation of viral process	91	0.135	0.124	0.13804
GO bp:go positive regulation of myeloid cell differentiation	77	0.148	0.136	0.13809
Curated gene sets:benporath es core nine correlated	97	0.127	0.117	0.13814
Curated gene sets:reactome prefoldin mediated transfer of substrate to cct tric	27	0.235	0.216	0.1383
Curated gene sets:vantveer breast cancer esr1 dn	231	0.0853	0.0785	0.13838
GO bp:go regulation of catabolic process	704	0.0486	0.0447	0.13851
GO bp:go retina development in camera type eye	129	0.112	0.103	0.13867
Curated gene sets:sasson response to forskolin dn	88	0.134	0.124	0.13869
Curated gene sets:flechner biopsy kidney transplant ok vs donor dn	25	0.224	0.206	0.13897
GO cc:go microbody membrane	54	0.161	0.149	0.13902
Curated gene sets:reactome synthesis of pips at the late endosome membrane	9	0.449	0.414	0.13938
Curated gene sets:gaussmann mll af4 fusion targets b up	23	0.251	0.232	0.13938
Curated gene sets:reactome diabetes pathways	125	0.109	0.1	0.13945
GO bp:go cellular response to radiation	133	0.106	0.0976	0.1395
GO bp:go ovarian follicle development	58	0.166	0.154	0.13995
Curated gene sets:pid pi3kci pathway	49	0.186	0.172	0.14006
GO bp:go primary amino compound metabolic process	13	0.324	0.301	0.14046
GO bp:go regulation of jak stat cascade	142	0.11	0.102	0.14075
GO bp:go regulation of stat cascade	142	0.11	0.102	0.14075
Curated gene sets:biocarta p53 pathway	16	0.308	0.286	0.14077
GO bp:go response to lipoprotein particle	20	0.288	0.268	0.14099
GO mf:go n acyltransferase activity	92	0.144	0.134	0.141
Curated gene sets:camps colon cancer copy number up	88	0.161	0.15	0.14109
Curated gene sets:pid igf1 pathway	30	0.211	0.197	0.14115
GO mf:go mismatched dna binding	12	0.314	0.292	0.14123
Curated gene sets:riz erythroid differentiation 12hr	41	0.203	0.189	0.14154
GO bp:go regulation of protein activation cascade	32	0.223	0.208	0.14164
Curated gene sets:blalock alzheimers disease incipient dn	156	0.0944	0.0881	0.14185
Curated gene sets:ohashi aurkb targets	9	0.397	0.37	0.14199
GO bp:go coenzyme catabolic process	12	0.369	0.344	0.14199
Curated gene sets:kegg endocytosis	178	0.0932	0.0871	0.14211
GO bp:go response to osmotic stress	61	0.164	0.153	0.14217
GO bp:go regulation of megakaryocyte differentiation	27	0.26	0.243	0.14221
Curated gene sets:zhang tlx targets 60hr dn	267	0.0715	0.0668	0.14225
Curated gene sets:kim myc amplification targets up	177	0.0934	0.0873	0.14238
GO bp:go nucleotide sugar biosynthetic process	18	0.274	0.257	0.1424
GO bp:go mrna transcription from rna polymerase ii promoter	14	0.33	0.309	0.14246
Curated gene sets:pasqualucci lymphoma by gc stage dn	159	0.104	0.0975	0.14252
GO bp:go sleep	14	0.309	0.289	0.14255
GO bp:go regulation of calcium ion dependent exocytosis	79	0.145	0.135	0.1426
GO bp:go positive regulation of triglyceride lipase activity	11	0.39	0.366	0.14285
Curated gene sets:nadler obesity dn	48	0.163	0.152	0.14301
GO bp:go interferon gamma mediated signaling pathway	66	0.168	0.157	0.14305
GO bp:go lymph vessel development	20	0.296	0.278	0.1431
GO bp:go lymphocyte activation involved in immune response	92	0.134	0.126	0.14316
Curated gene sets:reactome akt phosphorylates targets in the cytosol	12	0.374	0.351	0.14328
Curated gene sets:zhong response to azacitidine and tsa dn	64	0.144	0.135	0.14346
Curated gene sets:biocarta barr mapk pathway	12	0.389	0.365	0.14354
Curated gene sets:reactome signaling by wnt	63	0.147	0.138	0.14366
Curated gene sets:gargalovic response to oxidized phospholipids magenta up	27	0.217	0.204	0.14374
GO cc:go mhc class i protein complex	10	0.381	0.358	0.14374
Curated gene sets:wei mir34a targets	141	0.107	0.101	0.14409
Curated gene sets:reactome inwardly rectifying k channels	31	0.225	0.212	0.14424
Curated gene sets:reactome deadenylation of mrna	19	0.27	0.255	0.14436
Curated gene sets:caffarel response to thc 8hr 5 up	15	0.307	0.29	0.14453
Curated gene sets:ouellet ovarian cancer invasive vs lmp dn	11	0.335	0.316	0.14462
Curated gene sets:sweet kras targets dn	61	0.168	0.159	0.14462
GO bp:go negative regulation of cell division	58	0.163	0.153	0.14481
GO bp:go regulation of cell migration involved in sprouting angiogenesis	18	0.28	0.264	0.14487
Curated gene sets:zirn tretinoin response wt1 dn	6	0.473	0.447	0.1449
Curated gene sets:spielman lymphoblast european vs asian dn	561	0.0509	0.0481	0.14499
GO cc:go wnt signalosome	11	0.364	0.344	0.14505
GO cc:go catalytic step 2 spliceosome	87	0.122	0.115	0.14508
GO bp:go forebrain cell migration	58	0.165	0.156	0.1451
GO bp:go fibroblast growth factor receptor signaling pathway	82	0.135	0.128	0.14521
Curated gene sets:moreira response to tsa up	25	0.235	0.222	0.14522
Curated gene sets:rickman tumor differentiated moderately vs poorly up	114	0.116	0.11	0.14528
GO mf:go transcription factor activity rna polymerase ii core promoter sequence specific	13	0.365	0.345	0.14542
Curated gene sets:rodrigues thyroid carcinoma up	16	0.316	0.299	0.14557
Curated gene sets:wacker hypoxia targets of vhl	12	0.347	0.328	0.14562
Curated gene sets:li adipogenesis by activated pparg	17	0.272	0.258	0.14565
GO bp:go er to golgi vesicle mediated transport	161	0.0939	0.089	0.14586
GO bp:go eyelid development in camera type eye	13	0.381	0.362	0.14617
GO bp:go regulation of mitochondrial outer membrane permeabilization involved in apoptotic signaling pathway	42	0.187	0.178	0.14632
GO bp:go trna modification	58	0.154	0.146	0.14636
GO bp:go recombinational repair	79	0.131	0.125	0.14672
Curated gene sets:kegg tryptophan metabolism	37	0.196	0.186	0.14673
GO bp:go embryonic hemopoiesis	19	0.281	0.268	0.1468
GO bp:go membrane protein ectodomain proteolysis	20	0.288	0.275	0.1471
GO mf:go rna polymerase binding	36	0.212	0.202	0.14716
GO mf:go lamin binding	17	0.255	0.243	0.14716
GO bp:go response to calcium ion	112	0.121	0.115	0.14718
Curated gene sets:kegg proximal tubule bicarbonate reclamation	22	0.243	0.231	0.14719
GO bp:go protein dna complex subunit organization	202	0.0914	0.0873	0.14745
Curated gene sets:linsley mir16 targets	202	0.0845	0.0807	0.1477
GO mf:go snap receptor activity	36	0.187	0.179	0.14805
Curated gene sets:hahtola ctcl cutaneous	25	0.259	0.249	0.14826
GO bp:go vacuole organization	162	0.0934	0.0897	0.14875
Curated gene sets:flechner pbl kidney transplant rejected vs ok up	59	0.153	0.147	0.14876
Curated gene sets:smid breast cancer relapse in bone up	94	0.132	0.127	0.1488
GO bp:go mitochondrion morphogenesis	18	0.296	0.285	0.14882
Curated gene sets:boudoukha bound by igf2bp2	104	0.117	0.112	0.14889
Curated gene sets:verrecchia response to tgfb1 c4	13	0.365	0.351	0.149
Curated gene sets:manalo hypoxia dn	280	0.0693	0.0667	0.14934
GO mf:go catecholamine binding	15	0.31	0.298	0.14942
GO bp:go cellular response to nutrient	39	0.204	0.197	0.14949
Curated gene sets:slebos head and neck cancer with hpv up	76	0.128	0.124	0.14966
Curated gene sets:karlsson tgfb1 targets dn	200	0.0879	0.0847	0.14969
GO bp:go phagosome maturation	38	0.193	0.186	0.14991
GO cc:go condensed nuclear chromosome centromeric region	17	0.29	0.279	0.14993
GO mf:go dopamine binding	10	0.39	0.376	0.15014
GO bp:go reactive oxygen species biosynthetic process	21	0.241	0.232	0.15023
Curated gene sets:graessmann response to mc and doxorubicin dn	739	0.0447	0.0432	0.15032
GO bp:go pyridine containing compound biosynthetic process	22	0.246	0.238	0.15045
Curated gene sets:kasler hdac7 targets 2 dn	32	0.228	0.221	0.15047
Curated gene sets:biocarta fas pathway	30	0.233	0.225	0.15048
GO bp:go regulation of cell size	163	0.0995	0.0963	0.15081
Curated gene sets:wang lmo4 targets up	337	0.0639	0.0619	0.15084
GO bp:go glial cell fate commitment	13	0.36	0.348	0.15095
Curated gene sets:amit egf response 240 mcf10a	20	0.294	0.285	0.15109
GO bp:go actin filament bundle organization	47	0.165	0.16	0.15114
GO bp:go regulation of transcription elongation from rna polymerase ii promoter	24	0.259	0.251	0.15123
Curated gene sets:kyng dna damage by 4nqo or uv	59	0.151	0.147	0.15127
Curated gene sets:reactome recycling pathway of l1	22	0.249	0.242	0.15143
Curated gene sets:lein localized to distal and proximal dendrites	17	0.287	0.279	0.15195
GO bp:go regulation of cell shape	134	0.105	0.102	0.15201
GO bp:go telencephalon regionalization	13	0.377	0.367	0.15237
GO bp:go regulation of cell cycle	917	0.0394	0.0384	0.15245
GO cc:go mll1 2 complex	24	0.242	0.236	0.1526
GO bp:go astrocyte differentiation	38	0.196	0.191	0.15267
GO bp:go negative regulation of cell matrix adhesion	28	0.224	0.219	0.15274
GO bp:go regulation of neuron migration	28	0.254	0.248	0.15295
GO bp:go regulation of centriole replication	13	0.338	0.331	0.15298
GO bp:go positive regulation of wnt signaling pathway	149	0.1	0.098	0.1531
GO mf:go dna polymerase binding	12	0.384	0.375	0.15314
Curated gene sets:yao temporal response to progesterone cluster 3	14	0.307	0.3	0.15323
Curated gene sets:biocarta etc pathway	10	0.421	0.412	0.15332
Curated gene sets:zhan multiple myeloma ms dn	42	0.174	0.17	0.15337
GO bp:go striated muscle cell proliferation	15	0.34	0.332	0.15337
GO bp:go base excision repair	37	0.191	0.187	0.15347
Curated gene sets:peng glucose deprivation up	47	0.161	0.158	0.15362
GO bp:go liposaccharide metabolic process	106	0.115	0.113	0.15362
GO mf:go kinase inhibitor activity	87	0.127	0.124	0.15371
GO cc:go chd type complex	16	0.311	0.305	0.15373
Curated gene sets:st pac1 receptor pathway	7	0.481	0.472	0.15394
GO bp:go synaptic transmission glutamatergic	21	0.289	0.283	0.15407
Curated gene sets:moreaux b lymphocyte maturation by taci dn	72	0.148	0.145	0.15415
Curated gene sets:kegg sphingolipid metabolism	38	0.187	0.184	0.15475
Curated gene sets:bhat esr1 targets via akt1 dn	82	0.141	0.139	0.15499
GO bp:go protein o linked glycosylation	97	0.12	0.119	0.155
GO cc:go ap type membrane coat adaptor complex	39	0.187	0.185	0.15508
Curated gene sets:yao temporal response to progesterone cluster 14	140	0.1	0.0987	0.15519
GO bp:go mammary gland alveolus development	17	0.296	0.292	0.15528
GO bp:go mammary gland lobule development	17	0.296	0.292	0.15528
GO bp:go positive regulation of oligodendrocyte differentiation	13	0.364	0.359	0.15536
GO bp:go response to uv c	11	0.325	0.321	0.15541
Curated gene sets:kegg p53 signaling pathway	67	0.148	0.146	0.15565
GO bp:go positive regulation of circadian rhythm	21	0.237	0.235	0.15565
Curated gene sets:nakajima mast cell	42	0.178	0.176	0.15573
Curated gene sets:takao response to uvb radiation up	79	0.127	0.125	0.15577
GO bp:go regulation of extracellular matrix organization	29	0.214	0.212	0.15578
Curated gene sets:amundson poor survival after gamma radiation 2g	158	0.0966	0.0955	0.15581
Curated gene sets:reactome golgi associated vesicle biogenesis	46	0.175	0.173	0.15584
Curated gene sets:valk aml cluster 11	36	0.184	0.182	0.1559
Curated gene sets:eguchi cell cycle rb1 targets	23	0.24	0.237	0.15594
Curated gene sets:lein cerebellum markers	80	0.133	0.132	0.15606
GO bp:go regulation of attachment of spindle microtubules to kinetochore	11	0.318	0.315	0.15611
GO bp:go mitochondrial fusion	19	0.226	0.223	0.15614
Curated gene sets:pid fas pathway	37	0.204	0.202	0.15646
Curated gene sets:nakamura adipogenesis early dn	37	0.207	0.206	0.15671
Curated gene sets:myllykangas amplification hot spot 23	20	0.291	0.289	0.15675
Curated gene sets:petretto cardiac hypertrophy	32	0.199	0.198	0.15684
Curated gene sets:wu apoptosis by cdkn1a via tp53	55	0.144	0.143	0.15721
Curated gene sets:mori small pre bii lymphocyte dn	76	0.13	0.13	0.15733
GO bp:go translational initiation	135	0.0991	0.0985	0.15742
GO bp:go ribonucleoprotein complex subunit organization	188	0.0791	0.0787	0.15742
GO bp:go positive regulation of sprouting angiogenesis	13	0.291	0.29	0.15743
GO bp:go homeostatic process	1290	0.034	0.0339	0.15749
GO mf:go phosphotransferase activity phosphate group as acceptor	36	0.201	0.2	0.15754
Curated gene sets:koyama sema3b targets up	255	0.0746	0.0743	0.15755
Curated gene sets:weigel oxidative stress by hne and tbh	60	0.16	0.159	0.15776
GO bp:go negative regulation of chromosome organization	87	0.127	0.126	0.15777
Curated gene sets:thum systolic heart failure up	384	0.0616	0.0614	0.15787
GO cc:go trans golgi network transport vesicle membrane	13	0.319	0.318	0.15787
Curated gene sets:marks hdac targets dn	14	0.302	0.302	0.15801
GO bp:go cell matrix adhesion	117	0.104	0.104	0.15801
Curated gene sets:dorn adenovirus infection 32hr dn	39	0.181	0.18	0.15808
GO bp:go golgi organization	84	0.127	0.127	0.15817
Curated gene sets:korkola embryonal carcinoma dn	12	0.34	0.34	0.1582
Curated gene sets:oxford ralb targets dn	9	0.348	0.347	0.15822
GO cc:go vesicle membrane	489	0.0536	0.0535	0.15826
Curated gene sets:hellebrekers silenced during tumor angiogenesis	79	0.133	0.133	0.15877
Curated gene sets:reactome pre notch transcription and translation	26	0.237	0.237	0.15898
GO bp:go regulation of triglyceride metabolic process	33	0.204	0.204	0.15902
Curated gene sets:riz erythroid differentiation	72	0.133	0.133	0.15904
Curated gene sets:browne hcmv infection 20hr up	229	0.074	0.0742	0.15906
GO bp:go negative regulation of dna templated transcription elongation	13	0.311	0.312	0.1593
GO bp:go astrocyte development	18	0.276	0.277	0.15937
GO bp:go guanosine containing compound metabolic process	41	0.174	0.175	0.15943
GO bp:go positive regulation of potassium ion transmembrane transport	26	0.251	0.252	0.15955
GO bp:go positive regulation of actin cytoskeleton reorganization	16	0.288	0.29	0.15963
Curated gene sets:wierenga stat5a targets group1	127	0.0969	0.0973	0.15967
GO bp:go cellular response to topologically incorrect protein	119	0.102	0.102	0.15967
GO bp:go negative regulation of release of cytochrome c from mitochondria	16	0.269	0.271	0.15982
Curated gene sets:kegg taste transduction	50	0.189	0.19	0.15988
GO mf:go exopeptidase activity	99	0.121	0.121	0.16018
GO bp:go negative regulation of dna recombination	15	0.25	0.252	0.16021
GO bp:go negative regulation of fat cell differentiation	41	0.196	0.198	0.16078
Curated gene sets:kegg asthma	27	0.214	0.216	0.16081
Curated gene sets:yoshimura mapk8 targets up	1261	0.0339	0.0342	0.16084
GO bp:go development of primary sexual characteristics	196	0.0833	0.084	0.16086
GO bp:go cell surface receptor signaling pathway involved in cell cell signaling	66	0.135	0.136	0.16122
GO bp:go imidazole containing compound metabolic process	11	0.388	0.393	0.16132
GO cc:go protein dna complex	165	0.105	0.106	0.16149
Curated gene sets:biocarta extrinsic pathway	13	0.325	0.329	0.16152
GO bp:go regulation of phospholipid biosynthetic process	12	0.344	0.349	0.16185
GO mf:go protein serine threonine kinase activity	422	0.0566	0.0574	0.16191
Curated gene sets:pacher targets of igf1 and igf2 up	34	0.214	0.217	0.16196
GO bp:go inositol metabolic process	11	0.356	0.361	0.16203
GO bp:go reproduction	1197	0.0343	0.0348	0.16203
GO bp:go blastocyst formation	30	0.191	0.194	0.16211
GO bp:go peptidyl serine modification	142	0.0974	0.0988	0.16212
GO bp:go neuronal ion channel clustering	12	0.33	0.335	0.16234
GO bp:go dna metabolic process	720	0.0433	0.044	0.16239
GO bp:go regulation of viral genome replication	74	0.133	0.135	0.16246
GO bp:go dna ligation involved in dna repair	12	0.377	0.384	0.16255
Curated gene sets:stearman lung cancer early vs late dn	57	0.158	0.16	0.16261
GO bp:go substantia nigra development	41	0.186	0.189	0.16268
GO bp:go sperm motility	47	0.158	0.161	0.16277
GO bp:go long term synaptic depression	15	0.286	0.291	0.16278
GO bp:go negative regulation of gene expression epigenetic	98	0.13	0.132	0.16304
Curated gene sets:bandres response to carmustin without mgmt 24hr dn	9	0.462	0.471	0.16307
Curated gene sets:wang clim2 targets up	228	0.0746	0.076	0.1631
GO bp:go protein localization to vacuole	43	0.161	0.164	0.16322
GO bp:go neuronal action potential	28	0.232	0.237	0.1633
Curated gene sets:biocarta vegf pathway	27	0.213	0.217	0.16336
GO bp:go telomere maintenance via telomerase	16	0.283	0.289	0.16365
GO bp:go nls bearing protein import into nucleus	22	0.219	0.224	0.16383
GO bp:go temperature homeostasis	26	0.233	0.238	0.16386
GO mf:go ligand dependent nuclear receptor transcription coactivator activity	49	0.157	0.16	0.16395
GO bp:go anatomical structure homeostasis	273	0.0671	0.0685	0.16396
GO bp:go acyl coa biosynthetic process	50	0.166	0.17	0.16412
GO bp:go thioester biosynthetic process	50	0.166	0.17	0.16412
GO bp:go endosome to lysosome transport	37	0.199	0.203	0.1642
Curated gene sets:gregory synthetic lethal with imatinib	134	0.0952	0.0974	0.16421
Curated gene sets:reactome g beta gamma signalling through pi3kgamma	25	0.247	0.253	0.16462
Curated gene sets:biocarta ps1 pathway	14	0.322	0.33	0.16471
GO bp:go sex differentiation	243	0.0749	0.0768	0.16481
GO cc:go acrosomal vesicle	90	0.116	0.119	0.16503
Curated gene sets:shiraishi plzf targets up	9	0.333	0.342	0.16519
GO bp:go cellular response to cadmium ion	15	0.317	0.326	0.16522
GO bp:go response to gamma radiation	48	0.171	0.175	0.16533
GO mf:go transcription factor binding	492	0.0545	0.0561	0.16539
Curated gene sets:sabates colorectal adenoma dn	257	0.0718	0.0739	0.16543
Curated gene sets:reactome mrna splicing	102	0.102	0.105	0.16545
Curated gene sets:reactome trif mediated tlr3 signaling	67	0.144	0.148	0.16554
Curated gene sets:bhat esr1 targets not via akt1 dn	87	0.136	0.14	0.16557
GO bp:go phosphate ion transport	18	0.287	0.296	0.1656
GO bp:go ventricular system development	26	0.219	0.226	0.16586
GO bp:go mast cell activation	21	0.262	0.27	0.16586
GO cc:go microtubule cytoskeleton	1024	0.0356	0.0366	0.16589
Curated gene sets:reichert mitosis lin9 targets	28	0.2	0.207	0.16601
GO bp:go mitotic cell cycle	744	0.0409	0.0422	0.16604
GO bp:go negative regulation by host of viral transcription	12	0.334	0.344	0.16605
Curated gene sets:wilson proteases at tumor bone interface up	20	0.212	0.219	0.16607
Curated gene sets:reactome inhibition of voltage gated ca2 channels via gbeta gamma subunits	25	0.238	0.246	0.16626
GO mf:go phosphatidylinositol 3 kinase activity	71	0.147	0.152	0.16628
Curated gene sets:chang core serum response up	206	0.0732	0.0755	0.16641
GO bp:go positive regulation of synapse maturation	11	0.363	0.374	0.16644
Curated gene sets:purbey targets of ctbp1 not satb1 dn	402	0.0562	0.058	0.16652
Curated gene sets:reactome synthesis of very long chain fatty acyl coas	13	0.328	0.339	0.16658
GO bp:go myeloid cell differentiation	180	0.0816	0.0843	0.1667
GO bp:go positive regulation of myelination	11	0.38	0.393	0.16678
Curated gene sets:jazag tgfb1 signaling dn	34	0.187	0.194	0.16682
GO bp:go auditory receptor cell morphogenesis	13	0.316	0.327	0.16686
Curated gene sets:caffarel response to thc 8hr 3 up	5	0.463	0.48	0.16702
GO cc:go endocytic vesicle membrane	140	0.0977	0.101	0.16705
GO bp:go response to estradiol	145	0.0938	0.0971	0.16722
GO bp:go purine nucleobase metabolic process	19	0.285	0.296	0.16724
GO bp:go retrograde transport vesicle recycling within golgi	22	0.229	0.238	0.16728
GO cc:go centrosome	469	0.051	0.0529	0.16732
Curated gene sets:ivanova hematopoiesis stem cell short term	30	0.193	0.201	0.16757
GO bp:go adult behavior	131	0.0977	0.102	0.16783
GO bp:go glycolipid catabolic process	10	0.305	0.317	0.16783
Curated gene sets:pujana xprss int network	162	0.0826	0.0858	0.16808
[truncated: 8,893 more rows]
