# Supplementary material for: Study of 300,486 individuals identifies 148 independent genetic loci influencing general cognitive function
Source: Nat Commun. 2018 May 29;9:2098. doi: 10.1038/s41467-018-04362-x (PMC5974083; doi:10.1038/s41467-018-04362-x)
Supplement: Supplementary file 11 — Supplementary Data 8 [file 41467_2018_4362_MOESM11_ESM.xlsx]

## Sheet: Sheet1
Supplementary Data 8. MAGMA gene-property analysis for general cognitive function. 53 specific tissue types were created using gene expression data based on GTEx RNA-seq data. Tissue groupings that withstood Bonferroni are highlighted in bold.
Tissue group	Number of genes	Beta	SE	P
Brain Cerebellum	16778	0.0915	0.0108	9.4101e-18
Brain Cerebellar Hemisphere	16778	0.0869	0.0103	1.7732e-17
Brain Cortex	16778	0.0966	0.0122	1.2478e-15
Brain Frontal Cortex BA9	16778	0.0929	0.0118	1.7435e-15
Brain Anterior cingulate cortex BA24	16778	0.0904	0.0125	2.5781e-13
Brain Hippocampus	16778	0.0872	0.0142	3.7303e-10
Brain Nucleus accumbens basal ganglia	16778	0.0811	0.0132	4.0379e-10
Brain Hypothalamus	16778	0.0861	0.0144	1.3178e-09
Brain Amygdala	16778	0.0822	0.014	2.1105e-09
Brain Caudate basal ganglia	16778	0.0778	0.014	1.3249e-08
Brain Putamen basal ganglia	16778	0.0744	0.014	5.5025e-08
Brain Substantia nigra	16778	0.0642	0.0159	2.7903e-05
Pituitary	16778	0.0651	0.0165	4.129e-05
Brain Spinal cord cervical c1	16778	0.0438	0.0157	0.0026264
Testis	16778	0.0144	0.00896	0.054553
Ovary	16778	-0.000111	0.0189	0.50233
Cells EBV.transformed lymphocytes	16778	-0.000518	0.0083	0.52488
Uterus	16778	-0.0145	0.0241	0.7266
Nerve Tibial	16778	-0.0235	0.0223	0.85423
Colon Sigmoid	16778	-0.0426	0.0268	0.94426
Whole Blood	16778	-0.0163	0.00912	0.96302
Cells Transformed fibroblasts	16778	-0.0253	0.013	0.9739
Muscle Skeletal	16778	-0.0242	0.0116	0.98142
Cervix Endocervix	16778	-0.0564	0.0268	0.98234
Esophagus Gastroesophageal Junction	16778	-0.0619	0.0286	0.98479
Esophagus Muscularis	16778	-0.0583	0.0269	0.98494
Artery Aorta	16778	-0.0458	0.0209	0.98591
Cervix Ectocervix	16778	-0.0671	0.0303	0.98651
Artery Tibial	16778	-0.0462	0.0203	0.98852
Colon Transverse	16778	-0.0487	0.0213	0.98882
Adrenal Gland	16778	-0.0449	0.0189	0.99117
Pancreas	16778	-0.0362	0.0152	0.99134
Fallopian Tube	16778	-0.0708	0.0276	0.99487
Stomach	16778	-0.0641	0.0248	0.99509
Prostate	16778	-0.0695	0.0266	0.99552
Small Intestine Terminal Ileum	16778	-0.042	0.0157	0.99629
Bladder	16778	-0.0782	0.0268	0.99819
Artery Coronary	16778	-0.0776	0.0262	0.9985
Skin Not Sun Exposed Suprapubic	16778	-0.0438	0.0143	0.99892
Liver	16778	-0.0323	0.0103	0.99911
Skin Sun Exposed Lower leg	16778	-0.0457	0.0142	0.99934
Vagina	16778	-0.0781	0.0242	0.99937
Heart Atrial Appendage	16778	-0.0577	0.0177	0.99943
Spleen	16778	-0.0457	0.0131	0.99975
Adipose Subcutaneous	16778	-0.0807	0.0226	0.99982
Esophagus Mucosa	16778	-0.0478	0.0133	0.99984
Kidney Cortex	16778	-0.0674	0.0182	0.9999
Thyroid	16778	-0.0787	0.0207	0.99993
Breast Mammary Tissue	16778	-0.121	0.0291	0.99998
Heart Left Ventricle	16778	-0.0636	0.0156	0.99998
Adipose Visceral Omentum	16778	-0.101	0.0233	0.99999
Lung	16778	-0.0808	0.0188	0.99999
Minor Salivary Gland	16778	-0.087	0.0191	1
