# Supplementary material for: Study of 300,486 individuals identifies 148 independent genetic loci influencing general cognitive function
Source: Nat Commun. 2018 May 29;9:2098. doi: 10.1038/s41467-018-04362-x (PMC5974083; doi:10.1038/s41467-018-04362-x)
Supplement: Supplementary file 12 — Supplementary Data 9 [file 41467_2018_4362_MOESM12_ESM.xlsx]

## Sheet: Sheet1
Supplementary Data 9. Genetic correlations between general cognitive function, reaction time and 52 health outcomes. Significant genetic correlations (FDR p-value threshold general cognitive function =< 0.0269 reaction time =< 0.008) are highlighted in bold.
		General cognitive function			Reaction time
Trait category	Trait	rg	se	p	rg	se	p	h2 Z
Vascular-metabolic	Angina	-0.1792	0.031	7.58 × 10-9	-0.0505	0.0373	0.1754	10.48
	Coronary artery disease	-0.1125	0.037	0.0024	-0.0149	0.0453	0.7431	7.48
	HbA1c	-0.0366	0.0464	0.4298	-0.0894	0.0534	0.0942	5.31
	HDL cholesterol	0.092	0.0206	8.10 × 10-6	0.0146	0.0218	0.5037	6.53
	Heart attack	-0.1669	0.0331	4.74 × 10-7	-0.026	0.0394	0.5091	10.5
	Hypertension	-0.1452	0.019	2.44 × 10-14	0.0586	0.0218	0.0072	23.24
	LDL cholesterol	-0.055	0.0233	0.0185	-0.0191	0.0267	0.4756	4.16
	Pulse wave Arterial Stiffness	-0.081	0.0425	0.0567	-0.0276	0.0527	0.6006	7.66
	Triglycerides	-0.0515	0.0233	0.0269	-0.0097	0.0214	0.6504	4.74
	Type 2 diabetes	-0.0726	0.0358	0.0429	-0.0012	0.0403	0.9765	8.98
Neuropsychiatric	ADHD	-0.3688	0.0305	1.06 × 10-33	-0.1021	0.0355	0.004	15.16
	Alzheimer's disease	-0.3747	0.0894	2.78 × 10-5	0.0239	0.0601	0.6905	2.12
	Alzheimer's disease (500kb)	-0.3152	0.0515	9.65 × 10-10	0.0258	0.0508	0.6111	5.41
	Anorexia nervosa	0.0169	0.0259	0.5126	0.0638	0.0305	0.0362	18.51
	Autism spectrum disorder	0.1187	0.0419	0.0047	0.0634	0.042	0.1314	8.99
	Bipolar disorder	-0.0771	0.0375	0.0397	0.1261	0.0447	0.0048	10.41
	Depressive symptoms	-0.2765	0.0385	7.26 × 10-13	0.0086	0.0369	0.8157	12.84
	MDD	-0.3032	0.0409	1.28 × 10-13	0.0644	0.0424	0.1289	8.9
	Neuroticism	-0.162	0.022	1.79 × 10-13	0.0734	0.0246	0.0028	20.2
	Schizophrenia	-0.234	0.0212	3.24 × 10-28	0.2442	0.0231	4.94 × 10−26	22.53
	Subjective wellbeing	0.0265	0.0331	0.4231	-0.1098	0.0389	0.0047	12
Brain measures	Hippocampal volume	0.0735	0.0637	0.2491	-0.1247	0.0821	0.1287	3.63
	Intracranial volume	0.2684	0.0621	1.56 × 10-5	-0.0141	0.0645	0.8273	3.95
Physical and physiological	Age at Menarche	-0.0128	0.0184	0.4869	-0.0215	0.022	0.3303	22.01
	Age at Menopause	0.1264	0.0287	1.10 × 10-5	-0.0477	0.0352	0.1752	8.61
	Birth weight	0.1147	0.0242	2.09 × 10-6	-0.0275	0.0265	0.2982	17.79
	BMI	-0.1299	0.019	8.38 × 10-12	0.0091	0.0203	0.6544	18.43
	Bone density femoral neck	-0.0035	0.0336	0.9178	0.0107	0.0402	0.7903	8.51
	Bone density heel	-0.033	0.0189	0.0814	0.0193	0.0182	0.2881	8.72
	Bone density lumbar spine	0.0034	0.0343	0.9215	0.041	0.04	0.3046	8.74
	Fathers age at death	0.3675	0.0307	4.75 × 10-33	-0.082	0.0385	0.0331	11
	FEV1	0.1891	0.0209	1.33 × 10-19	-0.0385	0.0235	0.1007	22.87
	Hand grip strength (left)	0.0409	0.0214	0.0552	-0.1816	0.0228	1.6 × 10-15	25.32
	Hand grip strength (right)	0.0864	0.0211	4.08 × 10-5	-0.1779	0.022	6.65 × 10-16	24.71
	Happiness	0.0858	0.033	9.2 × 10-3	-0.0197	0.037	0.594	12.61
	Health satisfaction	-0.2589	0.0274	3.43 × 10-21	-0.0365	0.0348	0.2939	15.64
	Longevity	0.1699	0.0584	0.0036	0.009	0.063	0.8867	4.09
	Lung cancer	-0.2645	0.0452	4.73 × 10-9	0.0473	0.0464	0.3078	4.3
	Mothers age at death	0.4777	0.042	5.82 × 10-30	-0.122	0.046	0.008	7.74
	Osteoarthritis	-0.2378	0.036	3.78 × 10-11	-0.0997	0.0424	0.0186	11.12
	Overall health rating	-0.3945	0.0181	7.69 × 10-105	0.0225	0.0241	0.3516	32.1
	Parents age at death	0.3641	0.058	3.5 × 10-10	-0.0736	0.0617	0.2327	4.17
	Sleep duration	-0.0287	0.0219	0.1905	0.0798	0.0259	0.0021	19.27
	Sleeplessness/insomnia	-0.1201	0.0223	7.27 × 10-8	-0.037	0.028	0.1874	23.11
	Smoking status	-0.196	0.0361	5.61 × 10-8	-0.0523	0.0431	0.2248	11.07
	Waist-hip ratio	-0.173	0.0229	4.02 × 10-14	0.0207	0.0272	0.447	16.4
	Wears glasses or contact lenses	0.2809	0.0383	2.12 × 10-13	-0.0939	0.0428	0.028	9.47
	Reason for glasses/contact lenses: Longsightedness	-0.2124	0.0499	2.04 × 10-5	0.0395	0.0516	0.4433	6.19
	Reason for glasses/contact lenses: Shortsightedness	0.3231	0.0317	1.92 × 10-24	-0.0837	0.0381	0.0279	12.1
