# Supplementary material for: Study of 300,486 individuals identifies 148 independent genetic loci influencing general cognitive function
Source: Nat Commun. 2018 May 29;9:2098. doi: 10.1038/s41467-018-04362-x (PMC5974083; doi:10.1038/s41467-018-04362-x)
Supplement: Supplementary file 13 — Supplementary Data 10 [file 41467_2018_4362_MOESM13_ESM.xlsx]

## Sheet: Sheet1
Supplementary Data 10. Genome-wide significant (P < 5 x 10-8) SNP association results for UK Biobank reaction time. Lead SNPs highlighted in bold. GWA results for general cogntive function (GCF) are also shown.
CHR	BP	SNP	Allele 1	Allele2	EAF	Effect	SE	P	N	GCF Z score	GCF P
17	44167366	rs10775404	C	A	0.18233	-0.01638	0.001729	2.7227e-21	330069	4.025	5.688e-05
17	44241726	17:44241726_A_G	G	A	0.18294	-0.016339	0.0017285	3.31894e-21	330069	4.067	4.764e-05
17	44161441	rs8079695	T	C	0.18306	-0.016311	0.0017287	3.92645e-21	330069	4.087	4.379e-05
17	44243312	17:44243312_C_G	G	C	0.1829	-0.016295	0.0017286	4.2658e-21	330069	4.058	4.944e-05
17	44132301	rs7212857	A	C	0.18309	-0.016292	0.0017287	4.3451e-21	330069	4.063	4.846e-05
17	44206665	rs4792831	A	G	0.183	-0.016288	0.0017284	4.37522e-21	330069	4.106	4.025e-05
17	44248499	17:44248499_G_C	C	G	0.1829	-0.01629	0.0017286	4.38531e-21	330069	4.065	4.812e-05
17	44132659	rs11652003	A	G	0.18309	-0.016287	0.0017287	4.46684e-21	330069	4.175	2.984e-05
17	44204373	rs2016730	C	T	0.18303	-0.016277	0.0017284	4.64515e-21	330069	4.033	5.505e-05
17	44172679	rs7211983	A	G	0.18322	-0.016265	0.0017287	5.05825e-21	330069	4.088	4.342e-05
17	44219555	17:44219555_A_G	G	A	0.18303	-0.016249	0.0017287	5.49541e-21	330069	3.997	6.426e-05
17	44625928	rs1863115	A	C	0.73229	0.016585	0.0017677	6.51628e-21	330069	-4.512	6.423e-06
17	44259690	17:44259690_T_G	G	T	0.18394	-0.016122	0.0017283	1.07895e-20	330069	4.058	4.948e-05
17	44819595	rs17698176	G	T	0.21951	-0.015631	0.0017177	9.09913e-20	330069	4.704	2.546e-06
17	44321273	rs2532379	C	A	0.15409	-0.015756	0.001734	1.02565e-19	330069	4.127	3.674e-05
17	44230598	17:44230598_G_A	A	G	0.17303	-0.015464	0.001713	1.77011e-19	330069	4.185	2.856e-05
17	44248848	17:44248848_G_A	A	G	0.17309	-0.015432	0.0017129	2.0893e-19	330069	4.034	5.485e-05
17	44225231	17:44225231_G_A	A	G	0.17344	-0.0154	0.001713	2.49459e-19	330069	4.206	2.604e-05
17	44199290	rs4792830	C	T	0.17369	-0.015382	0.001713	2.72898e-19	330069	4.245	2.191e-05
17	44212030	rs12941738	C	A	0.17351	-0.015376	0.0017131	2.82488e-19	330069	4.237	2.266e-05
17	44136030	rs933317	T	C	0.17348	-0.015373	0.0017131	2.87078e-19	330069	4.232	2.318e-05
17	44136576	rs9303524	T	A	0.17348	-0.015373	0.0017131	2.87078e-19	330069	4.232	2.319e-05
17	44212362	rs117913167	T	C	0.1735	-0.015368	0.0017131	2.95121e-19	330069	4.226	2.378e-05
17	44143470	rs11079731	T	C	0.17346	-0.015365	0.0017131	2.99226e-19	330069	4.245	2.182e-05
17	44147404	rs9898030	A	C	0.17365	-0.015361	0.001713	3.05492e-19	330069	4.215	2.494e-05
17	44148705	rs6503456	C	A	0.17346	-0.015358	0.0017131	3.11172e-19	330069	4.267	1.978e-05
17	44186267	rs4997213	A	G	0.1736	-0.015358	0.0017131	3.11172e-19	330069	4.227	2.363e-05
17	44113969	rs7214674	T	C	0.17347	-0.015336	0.0017131	3.49945e-19	330069	4.236	2.277e-05
17	44118269	rs6503454	G	A	0.17347	-0.015336	0.0017131	3.49945e-19	330069	4.233	2.306e-05
17	44124640	rs8074761	A	G	0.17345	-0.015335	0.0017131	3.5156e-19	330069	4.252	2.119e-05
17	44219457	17:44219457_T_C	C	T	0.17346	-0.015329	0.0017131	3.63915e-19	330069	4.153	3.282e-05
17	44090393	rs12150530	C	T	0.16852	-0.015285	0.0017147	4.93174e-19	330069	4.978	6.424e-07
17	44268905	17:44268905_A_G	G	A	0.17443	-0.015222	0.0017127	6.25173e-19	330069	4.093	4.264e-05
17	44086267	rs4792897	G	A	0.16861	-0.015218	0.0017148	7.04693e-19	330069	5.004	5.611e-07
17	44332959	rs12953096	T	C	0.16915	-0.015142	0.0017113	8.91251e-19	330069	4.478	7.535e-06
17	44264420	17:44264420_G_C	C	G	0.17432	-0.015082	0.0017128	1.30918e-18	330069	4.107	4.012e-05
17	44040184	rs35838379	G	A	0.17702	-0.014871	0.0017214	5.68853e-18	330069	5.183	2.188e-07
17	44068339	rs2435214	A	G	0.17877	-0.014778	0.00172	8.57038e-18	330069	5.279	1.298e-07
17	44326895	rs79475968	C	T	0.17975	-0.014666	0.0017136	1.14815e-17	330069	3.496	0.0004726
17	44833217	rs35732828	A	C	0.15515	-0.014553	0.001711	1.81552e-17	330069	4.61	4.021e-06
17	44794558	rs12951057	G	C	0.16001	-0.014508	0.0017118	2.34963e-17	330069	4.712	2.452e-06
17	44808360	rs35937770	A	G	0.3233	-0.014359	0.0017333	1.19399e-16	330069	4.35	1.362e-05
17	44632463	rs568039055	C	G	0.19123	-0.014099	0.0017135	1.90985e-16	330069	2.599	0.009357
17	44848314	rs3809857	T	G	0.32083	-0.014201	0.0017323	2.46037e-16	330069	4.439	9.045e-06
17	44793283	rs17692129	T	C	0.32539	-0.014157	0.0017338	3.21366e-16	330069	4.309	1.642e-05
17	44343902	rs2532345	A	G	0.29158	-0.013842	0.0017516	2.74789e-15	330069	3.46	0.0005393
17	44076063	rs2471738	T	C	0.22842	-0.013463	0.0017257	6.1235e-15	330069	6.034	1.603e-09
2	59951465	rs13028903	T	C	0.44588	0.013329	0.0017381	1.74181e-14	330069	-2.001	0.04535
17	44576704	rs2942003	G	T	0.62831	0.013408	0.0017628	2.83792e-14	330069	-3.873	0.0001076
2	59952652	rs1442877	A	G	0.41588	0.013134	0.0017369	3.97192e-14	330069	-1.59	0.1118
17	44572068	rs3874943	G	A	0.51411	0.01303	0.0017406	7.11214e-14	330069	1.408	0.1592
2	104269262	rs264979	T	A	0.49968	0.012573	0.0017456	5.92925e-13	330069	0.696	0.4863
17	44063244	rs2435211	T	C	0.30223	-0.012338	0.0017328	1.08143e-12	330069	4.699	2.619e-06
2	104160383	rs10168817	A	G	0.50441	-0.012397	0.0017493	1.37088e-12	330069	-0.921	0.3571
2	104265569	rs1673466	G	A	0.49235	0.012329	0.0017463	1.67109e-12	330069	0.763	0.4454
2	104250376	rs6543227	G	A	0.50984	-0.012303	0.0017466	1.87068e-12	330069	-0.915	0.3601
2	104265522	rs1673465	A	G	0.49238	0.012301	0.0017463	1.87499e-12	330069	0.753	0.4513
2	104265586	rs1669603	A	T	0.49238	0.012297	0.0017463	1.90108e-12	330069	0.747	0.455
5	112036634	rs56335290	A	C	0.2184	0.012204	0.0017343	1.96789e-12	330069	0.894	0.3716
2	104234628	rs1823673	C	T	0.50749	-0.012281	0.0017466	2.05589e-12	330069	-0.889	0.374
2	104240596	rs12328263	A	T	0.50749	-0.01228	0.0017466	2.06063e-12	330069	-0.899	0.3685
2	104242980	rs10184977	C	T	0.50748	-0.01228	0.0017466	2.06063e-12	330069	-0.897	0.3695
12	111976776	rs648997	T	C	0.28069	-0.012891	0.0018338	2.07491e-12	330069	-1.279	0.201
2	104243331	rs10193525	A	G	0.50748	-0.012275	0.0017466	2.09894e-12	330069	-0.899	0.3684
2	104231852	rs7583069	A	G	0.50749	-0.012274	0.0017466	2.11349e-12	330069	-0.951	0.3414
2	104233274	rs10194188	A	G	0.50749	-0.012273	0.0017466	2.11836e-12	330069	-0.881	0.3781
2	104256567	rs264968	G	A	0.49233	0.012259	0.0017463	2.22844e-12	330069	0.875	0.3814
2	104253005	rs1901480	A	G	0.50769	-0.012257	0.0017464	2.24388e-12	330069	-0.88	0.3787
2	104255500	rs264964	A	G	0.49223	0.012256	0.0017463	2.25424e-12	330069	0.864	0.3878
2	104254564	rs264963	G	A	0.49233	0.012255	0.0017463	2.26464e-12	330069	0.879	0.3793
2	104256215	rs264967	A	G	0.49223	0.012254	0.0017463	2.26986e-12	330069	0.877	0.3808
2	104261180	rs1669607	C	T	0.49252	0.012244	0.0017462	2.36592e-12	330069	0.828	0.4076
2	104260702	rs1457458	C	T	0.49249	0.012241	0.0017462	2.38232e-12	330069	0.825	0.4091
2	104261295	rs1669608	G	C	0.49249	0.012242	0.0017462	2.38232e-12	330069	0.823	0.4103
2	104242992	rs10182416	G	A	0.50701	-0.012244	0.0017467	2.38781e-12	330069	-0.883	0.377
12	49389320	rs1054442	C	A	0.38227	0.012305	0.0017561	2.43781e-12	330069	6.412	1.432e-10
2	104248576	rs1597746	T	C	0.5077	-0.012237	0.0017465	2.44906e-12	330069	-0.881	0.3785
2	104253101	rs1901479	C	T	0.50777	-0.012229	0.0017464	2.52348e-12	330069	-0.846	0.3976
2	104245978	rs4851661	A	C	0.50768	-0.012229	0.0017466	2.5293e-12	330069	-0.888	0.3748
2	104257915	rs264969	G	T	0.49218	0.012223	0.0017463	2.58226e-12	330069	0.88	0.3791
2	104268557	rs264976	T	C	0.49226	0.012222	0.0017463	2.58821e-12	330069	0.783	0.4339
2	104244081	rs1304360	T	C	0.50775	-0.012213	0.0017466	2.70396e-12	330069	-0.903	0.3665
2	104229299	rs13426115	T	C	0.50777	-0.012212	0.0017466	2.71019e-12	330069	-0.856	0.3923
2	104271686	rs264919	A	C	0.49204	0.012211	0.0017465	2.71644e-12	330069	0.791	0.4292
2	104086428	rs266058	T	C	0.48432	0.012227	0.0017526	3.02691e-12	330069	1.015	0.3101
2	104118605	rs6543215	C	T	0.50999	-0.012225	0.0017531	3.0903e-12	330069	-0.963	0.3358
2	104109681	rs1040123	G	A	0.50945	-0.012205	0.0017511	3.17687e-12	330069	-0.987	0.3236
2	104192887	rs7569356	A	G	0.5088	-0.012171	0.0017462	3.1842e-12	330069	-1.007	0.314
2	104105609	rs13395153	C	T	0.51079	-0.012218	0.0017531	3.19154e-12	330069	-0.983	0.3256
2	104090213	rs266053	C	T	0.48431	0.012215	0.0017526	3.19154e-12	330069	0.916	0.3597
2	104107978	rs4380263	A	G	0.50966	-0.012204	0.0017514	3.21366e-12	330069	-0.994	0.3201
2	104268285	rs264974	A	T	0.49205	0.012168	0.0017465	3.25087e-12	330069	0.725	0.4683
2	104106404	rs7570677	G	A	0.50946	-0.012195	0.0017511	3.31131e-12	330069	-0.989	0.3227
2	104231295	rs7570362	T	A	0.52277	-0.012193	0.0017512	3.34195e-12	330069	-0.936	0.3493
2	104243220	rs10170544	A	C	0.52269	-0.012185	0.0017511	3.43558e-12	330069	-0.94	0.3474
2	104204603	rs1869072	A	G	0.50847	-0.012141	0.0017463	3.59749e-12	330069	-0.938	0.3484
2	104165751	rs2167542	G	A	0.52357	-0.012172	0.001751	3.62243e-12	330069	-0.998	0.3182
2	104094008	rs817223	C	T	0.48348	0.012184	0.0017527	3.62243e-12	330069	0.984	0.325
2	104238501	rs6719978	A	G	0.52279	-0.012172	0.0017512	3.64754e-12	330069	-0.935	0.3498
2	104219692	rs1451986	A	G	0.50871	-0.012128	0.0017465	3.81066e-12	330069	-0.958	0.3383
2	104207059	rs6725382	C	T	0.50865	-0.012127	0.0017464	3.81944e-12	330069	-0.98	0.3272
2	104226203	rs10209710	A	T	0.50877	-0.012127	0.0017466	3.83707e-12	330069	-0.929	0.3528
17	44061893	rs2435209	T	G	0.30275	-0.012019	0.0017313	3.86367e-12	330069	4.661	3.147e-06
2	104207776	rs2100330	G	A	0.50878	-0.012119	0.0017462	3.92645e-12	330069	-0.965	0.3345
2	104227258	rs7608358	G	A	0.50877	-0.012119	0.0017466	3.96278e-12	330069	-0.931	0.352
2	201163783	rs4673905	G	A	0.31852	0.012099	0.0017438	3.98107e-12	330069	-2.79	0.005276
2	104226645	rs13428758	G	A	0.50877	-0.012115	0.0017466	4.02717e-12	330069	-0.931	0.352
2	104222490	rs1451987	G	C	0.50868	-0.012114	0.0017465	4.03645e-12	330069	-0.941	0.3465
17	44061894	rs2435210	T	C	0.30279	-0.012005	0.0017313	4.1115e-12	330069	4.694	2.673e-06
5	112021399	rs7727738	G	A	0.49342	-0.012139	0.0017509	4.12098e-12	330069	0.245	0.8066
2	104077211	rs266071	C	G	0.48489	0.012154	0.0017531	4.13048e-12	330069	0.965	0.3345
2	104141171	rs2068081	C	T	0.51322	-0.012149	0.001753	4.20727e-12	330069	-0.949	0.3426
2	104217338	rs7590785	T	A	0.50869	-0.012101	0.0017464	4.2462e-12	330069	-0.982	0.3262
2	104113702	rs6751705	G	T	0.50942	-0.012132	0.0017511	4.2658e-12	330069	-1.08	0.2803
2	104076420	rs266069	C	A	0.48519	0.012143	0.0017526	4.2658e-12	330069	1.005	0.3149
2	104240205	rs11123965	C	T	0.52256	-0.012134	0.0017514	4.27563e-12	330069	-1.094	0.2741
2	104113747	rs6543211	G	A	0.50942	-0.012132	0.0017511	4.27563e-12	330069	-1.016	0.3094
2	104212873	rs10207229	A	G	0.50866	-0.012098	0.0017464	4.29536e-12	330069	-0.975	0.3296
2	104220242	rs7560924	A	G	0.50869	-0.012098	0.0017465	4.29536e-12	330069	-0.962	0.3358
2	104078658	rs1368551	G	A	0.48616	0.012126	0.0017513	4.40555e-12	330069	1.03	0.3031
2	104204520	rs1869073	C	T	0.51521	-0.012115	0.0017503	4.46684e-12	330069	-1.155	0.2482
2	104084698	rs266061	A	G	0.48486	0.01213	0.0017531	4.54988e-12	330069	1.069	0.2849
2	201180023	rs3820888	C	T	0.39145	0.012077	0.0017469	4.73151e-12	330069	-2.162	0.03059
2	104251732	rs1901481	C	T	0.52025	-0.012094	0.00175	4.83059e-12	330069	-0.974	0.3299
2	104233265	rs10185978	C	T	0.52021	-0.012095	0.0017502	4.83059e-12	330069	-0.937	0.3486
2	104236822	rs12328095	A	G	0.52022	-0.012094	0.0017501	4.84172e-12	330069	-0.955	0.3398
2	104078655	rs1368550	C	T	0.48569	0.012108	0.0017527	4.9204e-12	330069	1.078	0.2809
2	104088908	rs266048	G	A	0.48534	0.012099	0.0017523	5.04661e-12	330069	1.051	0.2935
2	104113458	rs6761396	A	G	0.50909	-0.012086	0.0017506	5.05825e-12	330069	-1.064	0.2871
2	104239736	rs1584705	C	T	0.52022	-0.012084	0.0017501	5.05825e-12	330069	-0.974	0.3299
2	104240420	rs11888473	C	T	0.52022	-0.012083	0.0017502	5.06991e-12	330069	-0.986	0.324
2	104242306	rs7585415	A	G	0.52021	-0.012081	0.0017501	5.09331e-12	330069	-0.969	0.3324
2	104242180	rs10167065	G	C	0.52022	-0.012081	0.0017501	5.10505e-12	330069	-0.974	0.33
2	104243508	rs10193705	A	G	0.52021	-0.01208	0.0017501	5.11682e-12	330069	-0.964	0.3352
17	44184828	rs4510068	T	G	0.39893	-0.011997	0.0017382	5.12861e-12	330069	-2.512	0.01202
2	104089193	rs266049	A	G	0.48536	0.012096	0.0017524	5.12861e-12	330069	1.039	0.2986
2	104092326	rs197451	T	C	0.48515	0.012098	0.0017528	5.14044e-12	330069	1.038	0.2995
2	104279490	rs264926	A	C	0.48084	0.01206	0.0017475	5.15229e-12	330069	0.804	0.4211
2	104242721	rs7576621	G	T	0.521	-0.012086	0.0017513	5.16416e-12	330069	-1	0.3172
2	201183888	rs7605146	A	G	0.39143	0.012054	0.0017468	5.17607e-12	330069	-2.153	0.03136
2	104243342	rs10182738	G	A	0.51924	-0.012078	0.0017501	5.17607e-12	330069	-0.96	0.337
17	44852612	rs62074125	C	A	0.25412	0.012092	0.001753	5.28445e-12	330069	2.49	0.01276
2	104273554	rs264921	G	A	0.49351	0.012043	0.0017464	5.37032e-12	330069	0.872	0.3832
2	104258261	rs264970	C	T	0.47929	0.012067	0.0017502	5.40754e-12	330069	0.92	0.3576
2	104255919	rs264965	A	C	0.47975	0.012062	0.0017495	5.42001e-12	330069	0.937	0.3489
2	104164950	rs4851031	G	A	0.52195	-0.012071	0.0017513	5.48277e-12	330069	-1.064	0.2873
2	104164439	rs1983305	C	T	0.52134	-0.012067	0.0017507	5.48277e-12	330069	-1.05	0.2938
2	104183537	rs6543218	C	A	0.52206	-0.01207	0.0017513	5.49541e-12	330069	-1.071	0.2842
2	104093800	rs266055	A	C	0.48543	0.012078	0.0017524	5.49541e-12	330069	1.046	0.2954
2	104267572	rs67716713	A	C	0.4937	0.012035	0.0017462	5.49541e-12	330069	0.84	0.4007
2	104163187	rs6721892	A	G	0.52181	-0.012071	0.0017515	5.50808e-12	330069	-1.079	0.2808
17	44265839	17:44265839_C_T	T	C	0.40974	-0.011977	0.0017378	5.52077e-12	330069	-2.955	0.003124
2	104183265	rs6543217	G	A	0.52207	-0.012069	0.0017513	5.52077e-12	330069	-1.038	0.2991
2	104186652	rs13411937	G	A	0.52166	-0.012066	0.0017509	5.54626e-12	330069	-1.06	0.289
2	104297420	rs264941	A	C	0.47047	0.012036	0.0017467	5.55904e-12	330069	1.063	0.2877
2	104073034	rs817225	A	G	0.48607	0.012067	0.0017513	5.57186e-12	330069	1.06	0.2892
2	104273996	rs264922	G	A	0.49395	0.012029	0.0017462	5.64937e-12	330069	0.838	0.402
2	104147753	rs6723416	G	A	0.51294	-0.012069	0.0017522	5.68853e-12	330069	-1.002	0.3165
2	104175422	rs7577997	C	G	0.52146	-0.012057	0.0017507	5.70164e-12	330069	-1.035	0.3006
2	201171191	rs10931898	G	C	0.39103	0.01203	0.0017469	5.72796e-12	330069	-2.173	0.0298
2	104092954	rs2257063	T	C	0.48418	0.012068	0.0017525	5.74116e-12	330069	1.1	0.2715
2	104179160	rs6733755	C	T	0.52193	-0.012061	0.0017515	5.7544e-12	330069	-1.065	0.2868
2	104178377	rs7580027	G	T	0.52193	-0.012061	0.0017515	5.7544e-12	330069	-1.055	0.2913
2	104298619	rs264944	C	T	0.47146	0.01202	0.0017459	5.79429e-12	330069	1.058	0.2899
2	104258476	rs264971	C	G	0.4792	0.01205	0.0017502	5.79429e-12	330069	0.907	0.3647
2	104173664	rs1451974	T	C	0.52137	-0.012052	0.0017507	5.80764e-12	330069	-1.051	0.2931
2	104268301	rs264975	A	G	0.4801	0.012033	0.0017478	5.80764e-12	330069	0.847	0.3967
2	104097914	rs1579547	C	T	0.51455	-0.012062	0.0017524	5.8479e-12	330069	-1.052	0.2927
2	104095893	rs11675977	A	G	0.48547	0.012062	0.0017524	5.86138e-12	330069	1.058	0.2902
2	104259981	rs264972	T	G	0.47916	0.012044	0.0017501	5.91562e-12	330069	0.923	0.3559
2	104268790	rs264978	A	C	0.48075	0.012027	0.0017476	5.91562e-12	330069	0.824	0.4099
2	104117668	rs1514999	C	G	0.51424	-0.012069	0.0017538	5.92925e-12	330069	-0.966	0.334
2	104096271	rs11677232	A	G	0.48544	0.012057	0.0017523	5.95662e-12	330069	1.04	0.2985
2	104268754	rs264977	C	T	0.48162	0.01202	0.0017468	5.95662e-12	330069	0.848	0.3964
2	104096243	rs11677228	A	G	0.48545	0.012057	0.0017523	5.97035e-12	330069	1.039	0.2986
2	104352495	rs12616219	A	C	0.47225	0.012016	0.0017466	6.0256e-12	330069	1.081	0.2795
2	104199025	rs6711344	G	A	0.52408	-0.012045	0.0017511	6.03949e-12	330069	-0.99	0.3223
2	104095980	rs1836054	C	T	0.48549	0.012053	0.0017523	6.06736e-12	330069	1.047	0.295
2	104264825	rs1669602	T	C	0.48073	0.012021	0.0017476	6.06736e-12	330069	0.816	0.4143
2	104264977	rs1673464	T	C	0.48072	0.012021	0.0017476	6.06736e-12	330069	0.804	0.4214
2	104092943	rs171952	G	A	0.48416	0.012053	0.0017525	6.09537e-12	330069	1.094	0.2738
2	104077400	rs266073	T	C	0.48667	0.012045	0.0017514	6.10942e-12	330069	1.111	0.2667
2	104227869	rs6543223	C	T	0.52388	-0.012043	0.0017512	6.10942e-12	330069	-0.991	0.3216
2	104269979	rs264980	T	C	0.48076	0.012019	0.0017476	6.10942e-12	330069	0.808	0.419
2	104155545	rs6734144	G	A	0.51425	-0.012059	0.0017536	6.13762e-12	330069	-0.994	0.3203
2	104153212	rs7595711	G	A	0.51421	-0.012059	0.0017538	6.16595e-12	330069	-0.979	0.3277
17	44189067	rs7225002	G	A	0.41041	-0.011945	0.001738	6.29506e-12	330069	-2.937	0.003312
17	44654416	rs4630592	C	A	0.61235	0.012137	0.0017665	6.39735e-12	330069	-3.179	0.001476
2	104228863	rs13396809	A	G	0.52132	-0.012033	0.0017514	6.39735e-12	330069	-0.983	0.3257
2	104301541	rs264948	T	C	0.47172	0.011993	0.0017457	6.44169e-12	330069	1.052	0.2927
2	104253461	rs10198643	C	A	0.52005	-0.012013	0.0017491	6.51628e-12	330069	-0.949	0.3428
2	104077388	rs266072	A	G	0.48674	0.012028	0.0017514	6.53131e-12	330069	1.074	0.2827
2	104255937	rs264966	C	T	0.47949	0.012021	0.0017504	6.54636e-12	330069	0.923	0.3559
2	104302490	rs264949	C	T	0.47171	0.011987	0.0017457	6.59174e-12	330069	1.048	0.2947
2	201168758	rs56326533	C	T	0.39111	0.011993	0.0017469	6.65273e-12	330069	-2.136	0.03264
2	104143998	rs1451982	G	T	0.51249	-0.012033	0.0017533	6.76083e-12	330069	-1.014	0.3108
2	104142699	rs7574952	G	A	0.51248	-0.012032	0.0017533	6.77642e-12	330069	-1.017	0.3093
2	104150891	rs6738833	C	T	0.51301	-0.012023	0.0017525	6.85488e-12	330069	-1.043	0.2969
2	104122451	rs1399547	C	G	0.51244	-0.012027	0.0017531	6.87068e-12	330069	-1.008	0.3134
2	104119652	rs1514998	G	A	0.51238	-0.012027	0.0017532	6.88652e-12	330069	-1.008	0.3133
2	104133885	rs1839893	T	C	0.51249	-0.012027	0.0017533	6.9024e-12	330069	-1.018	0.3085
2	104141293	rs7582785	T	G	0.51247	-0.012027	0.0017533	6.9024e-12	330069	-0.998	0.3182
2	104137154	rs7567562	A	G	0.51249	-0.012027	0.0017533	6.91831e-12	330069	-1.014	0.3105
2	104153362	rs1597741	G	T	0.51239	-0.012027	0.0017533	6.93426e-12	330069	-1.004	0.3156
2	104249538	rs4441492	G	A	0.52136	-0.012011	0.0017511	6.93426e-12	330069	-0.897	0.3697
2	104150233	rs1597742	G	T	0.51294	-0.012017	0.0017523	6.98232e-12	330069	-1.037	0.2997
2	104149830	rs1597743	G	A	0.51294	-0.012018	0.0017523	6.98232e-12	330069	-1.022	0.3067
2	104124146	rs17336454	T	G	0.51247	-0.012024	0.0017531	6.98232e-12	330069	-1.007	0.3141
2	104119885	rs4369880	G	A	0.51234	-0.012023	0.0017532	7.01455e-12	330069	-0.992	0.3213
2	104126983	rs1901477	G	A	0.51248	-0.012023	0.0017533	7.01455e-12	330069	-0.986	0.3243
2	104124363	rs7584767	G	C	0.5124	-0.012022	0.0017532	7.03072e-12	330069	-0.996	0.3193
2	104125396	rs4283441	T	C	0.51244	-0.012019	0.0017531	7.09578e-12	330069	-1.009	0.313
2	104123234	rs7573399	A	G	0.51222	-0.012017	0.0017529	7.09578e-12	330069	-0.999	0.3176
2	104129328	rs7564071	C	A	0.51238	-0.012018	0.0017532	7.14496e-12	330069	-1.004	0.3154
2	104133966	rs1839892	C	T	0.51249	-0.012018	0.0017533	7.14496e-12	330069	-0.984	0.3249
2	104134223	rs11894548	G	C	0.51243	-0.012018	0.0017534	7.16143e-12	330069	-0.996	0.3194
2	104349164	rs7564607	T	C	0.47224	0.011971	0.0017466	7.17794e-12	330069	1.138	0.2551
2	104195719	rs6543220	C	A	0.5214	-0.011992	0.0017499	7.24436e-12	330069	-1.034	0.3012
2	104191317	rs2375765	T	A	0.52138	-0.011992	0.0017499	7.24436e-12	330069	-1.028	0.3039
2	104192377	rs7559489	C	T	0.52139	-0.011991	0.0017499	7.26106e-12	330069	-1.058	0.29
2	104191900	rs2375766	A	G	0.52139	-0.011991	0.0017499	7.26106e-12	330069	-1.031	0.3024
2	104195755	rs6738539	T	C	0.52139	-0.01199	0.0017498	7.29458e-12	330069	-1.024	0.3061
2	104155913	rs10191724	C	T	0.51251	-0.01201	0.0017531	7.36207e-12	330069	-1.016	0.3096
2	104196439	rs7591265	T	C	0.52231	-0.011995	0.0017513	7.43019e-12	330069	-1.043	0.2969
2	104339810	rs1457456	C	G	0.47218	0.01196	0.0017463	7.44732e-12	330069	1.156	0.2477
2	104335186	rs1947565	A	G	0.47222	0.011959	0.0017462	7.4817e-12	330069	1.124	0.2612
2	104156821	rs11123960	G	A	0.51254	-0.012004	0.0017531	7.55092e-12	330069	-1.007	0.3142
2	104157067	rs11123963	C	T	0.51253	-0.012002	0.0017531	7.60326e-12	330069	-0.991	0.3215
2	104159202	rs2198234	T	G	0.52719	-0.011997	0.0017526	7.63836e-12	330069	-1.303	0.1925
6	109000742	rs4946935	G	A	0.69982	-0.012285	0.0017949	7.6913e-12	330069	5.8	6.645e-09
2	104351181	rs13014565	C	G	0.47213	0.011955	0.0017467	7.6913e-12	330069	1.101	0.2707
17	44289832	17:44289832_A_G	G	A	0.40951	-0.011894	0.0017378	7.70903e-12	330069	-3.074	0.002114
2	104303311	rs264952	C	T	0.46188	0.011954	0.0017472	7.8343e-12	330069	1.095	0.2734
2	104333924	rs1379428	T	C	0.47238	0.011946	0.0017461	7.85236e-12	330069	1.135	0.2563
6	108996748	rs3800228	G	T	0.70035	-0.012279	0.0017951	7.92501e-12	330069	5.815	6.069e-09
2	104318437	rs12621003	C	T	0.46006	0.011948	0.0017467	7.92501e-12	330069	1.126	0.2602
2	104345035	rs7602419	T	C	0.4715	0.01194	0.0017469	8.20352e-12	330069	1.145	0.252
2	104313050	rs13012802	C	T	0.46014	0.011934	0.0017467	8.37529e-12	330069	1.102	0.2704
6	109003989	rs9400241	A	C	0.6973	-0.012271	0.0017961	8.3946e-12	330069	5.497	3.865e-08
2	104313670	rs13032605	T	C	0.46016	0.01193	0.0017467	8.4918e-12	330069	1.096	0.2733
2	104314216	rs2085484	A	G	0.46017	0.01193	0.0017467	8.51138e-12	330069	1.104	0.2696
2	104318287	rs12620969	G	T	0.46017	0.011928	0.0017467	8.57038e-12	330069	1.123	0.2616
2	104329002	rs7564172	C	T	0.47233	0.011925	0.0017463	8.59014e-12	330069	1.098	0.2722
2	104302935	rs264950	C	T	0.46017	0.011927	0.0017467	8.59014e-12	330069	1.069	0.285
2	104320510	rs11675245	A	G	0.46093	0.011921	0.0017458	8.62979e-12	330069	1.107	0.2682
2	104203679	rs6543222	C	T	0.5224	-0.011958	0.0017514	8.64968e-12	330069	-1.087	0.2769
2	104330042	rs1598777	A	G	0.47232	0.011923	0.0017463	8.66962e-12	330069	1.107	0.2684
2	104367424	rs1379430	G	A	0.52561	0.01192	0.0017459	8.66962e-12	330069	1.031	0.3027
2	104139615	rs1427352	G	C	0.5127	-0.01197	0.0017532	8.66962e-12	330069	-1.003	0.3161
2	104340148	rs1457457	T	A	0.4723	0.011921	0.0017463	8.70964e-12	330069	1.13	0.2584
17	44058111	rs2435206	T	C	0.30752	-0.011816	0.0017314	8.8308e-12	330069	4.685	2.802e-06
2	104227871	rs6543224	T	C	0.52076	-0.01194	0.0017495	8.8308e-12	330069	-0.985	0.3248
2	104323618	rs4295030	T	A	0.46019	0.011917	0.0017465	8.93305e-12	330069	1.156	0.2476
2	104198288	rs2084814	C	T	0.52191	-0.011944	0.0017505	8.93305e-12	330069	-1	0.3175
2	104320141	rs921967	A	G	0.46105	0.01191	0.0017457	8.97429e-12	330069	0.979	0.3276
2	104202712	rs6727525	G	T	0.52239	-0.011947	0.0017514	9.03649e-12	330069	-1.065	0.287
2	104347660	rs2219373	G	A	0.47225	0.011913	0.0017466	9.05733e-12	330069	1.113	0.2659
2	104346788	rs12478719	T	C	0.47233	0.011911	0.0017465	9.12011e-12	330069	1.121	0.2622
2	104361420	rs9308868	A	G	0.52546	0.011912	0.0017467	9.12011e-12	330069	0.964	0.3348
2	104227395	rs7558335	C	T	0.52232	-0.011943	0.0017514	9.1622e-12	330069	-1.025	0.3054
2	104295741	rs264935	T	C	0.46032	0.011912	0.0017468	9.18333e-12	330069	1.075	0.2823
9	76909386	rs2604268	T	C	0.74359	0.011798	0.0017303	9.2045e-12	330069	-2.891	0.003843
2	104285359	rs264931	A	G	0.4599	0.011906	0.0017468	9.37562e-12	330069	1.097	0.2727
2	104297247	rs264940	C	A	0.46041	0.011904	0.0017468	9.44061e-12	330069	1.085	0.2778
2	104296743	rs264938	C	T	0.46041	0.011904	0.0017468	9.46237e-12	330069	1.057	0.2906
2	104314054	rs2085483	T	G	0.46131	0.011897	0.0017458	9.48418e-12	330069	1.088	0.2766
2	104315943	rs6718448	G	C	0.46133	0.011895	0.0017458	9.54993e-12	330069	1.129	0.259
2	104311653	rs58565191	A	G	0.46064	0.011901	0.0017467	9.54993e-12	330069	1.056	0.2911
2	104295747	rs264936	A	G	0.46161	0.011893	0.0017458	9.59401e-12	330069	1.072	0.2837
2	104317050	rs7589278	G	A	0.46116	0.011892	0.0017456	9.61612e-12	330069	1.139	0.2547
2	104319881	rs921965	A	G	0.46123	0.011891	0.0017454	9.61612e-12	330069	1.132	0.2577
2	104283391	rs264929	C	T	0.45993	0.011898	0.0017468	9.66051e-12	330069	1.07	0.2848
2	104298784	rs264945	T	C	0.46022	0.011897	0.0017466	9.68278e-12	330069	1.072	0.2835
2	104217789	rs4851660	A	T	0.52141	-0.011919	0.0017498	9.68278e-12	330069	-1.033	0.3017
6	109003321	rs4946936	C	T	0.69743	-0.012236	0.0017964	9.7051e-12	330069	5.582	2.376e-08
2	104285180	rs264930	C	T	0.46116	0.011891	0.0017458	9.7051e-12	330069	1.091	0.2753
2	104219240	rs10189533	A	C	0.52188	-0.011923	0.0017505	9.72747e-12	330069	-1.007	0.3139
2	104298906	rs264946	C	T	0.46035	0.011897	0.0017468	9.7499e-12	330069	1.084	0.2784
2	104296570	rs264937	A	G	0.45995	0.011896	0.0017468	9.77237e-12	330069	1.095	0.2735
2	104220144	rs10192716	G	C	0.52235	-0.011926	0.0017513	9.77237e-12	330069	-1.06	0.2893
2	104222589	rs1451988	G	A	0.52236	-0.011927	0.0017513	9.77237e-12	330069	-1.049	0.2941
2	201163454	rs4673904	T	A	0.39117	0.011895	0.0017469	9.84011e-12	330069	-2.204	0.02751
2	104159785	rs4851029	G	T	0.52548	-0.01193	0.0017521	9.84011e-12	330069	-1.371	0.1705
2	104304216	rs264954	T	C	0.46015	0.011889	0.0017467	1.00231e-11	330069	1.258	0.2082
2	104299089	rs264947	A	G	0.46017	0.011888	0.0017466	1.00462e-11	330069	1.078	0.2812
2	104278688	rs264925	G	A	0.48235	0.011892	0.0017475	1.00925e-11	330069	0.887	0.3752
2	104306016	rs264958	T	C	0.46017	0.011884	0.0017467	1.01859e-11	330069	1.079	0.2806
2	104276502	rs171939	G	A	0.48239	0.011889	0.0017474	1.02329e-11	330069	0.889	0.3739
2	104305359	rs264956	G	A	0.46101	0.011876	0.0017458	1.02565e-11	330069	1.098	0.2724
2	104303387	rs264953	A	G	0.46014	0.011883	0.0017467	1.02802e-11	330069	1.102	0.2706
2	104303008	rs264951	A	G	0.46016	0.011882	0.0017467	1.03276e-11	330069	0.987	0.3236
2	104116970	rs6543214	C	A	0.50995	-0.0119	0.0017502	1.05196e-11	330069	-1.056	0.2911
12	112023067	rs11065961	A	G	0.73255	0.012496	0.0018379	1.05439e-11	330069	1.765	0.07757
9	76908691	rs2781748	C	T	0.74362	0.011765	0.0017304	1.05682e-11	330069	-2.909	0.003631
9	76899036	rs2604263	A	T	0.74366	0.011764	0.0017305	1.0617e-11	330069	-3.045	0.00233
2	104308545	rs264962	G	C	0.46126	0.011867	0.0017456	1.0617e-11	330069	1.113	0.2659
2	104275976	rs264923	T	C	0.48229	0.011879	0.0017475	1.0617e-11	330069	0.851	0.395
2	104215251	rs2044934	G	T	0.52154	-0.011895	0.0017498	1.06414e-11	330069	-1.034	0.3011
9	76908607	rs517674	G	C	0.74362	0.01176	0.0017305	1.07647e-11	330069	-2.894	0.003799
2	104311652	rs34830911	C	T	0.46165	0.011862	0.0017456	1.07895e-11	330069	1.055	0.2913
2	104306560	rs264959	T	C	0.46115	0.011861	0.0017456	1.08643e-11	330069	1.394	0.1634
2	104307810	rs264961	T	G	0.46113	0.01186	0.0017456	1.08893e-11	330069	1.106	0.2686
5	112029376	rs953916	G	C	0.51081	-0.011901	0.0017519	1.09901e-11	330069	0.99	0.3223
2	104333463	rs1598779	C	G	0.47242	0.011861	0.0017461	1.10408e-11	330069	1.171	0.2416
2	104305595	rs264957	T	C	0.46114	0.011857	0.0017456	1.10408e-11	330069	0.905	0.3655
9	76906920	rs2781746	C	T	0.74373	0.011753	0.0017304	1.10917e-11	330069	-2.931	0.003377
9	76907444	rs2604266	T	C	0.74359	0.01175	0.0017306	1.1246e-11	330069	-2.9	0.003731
12	49389476	rs3741619	A	G	0.31332	0.01191	0.0017543	1.1298e-11	330069	5.058	4.236e-07
9	76904587	rs2604264	G	C	0.74416	0.011748	0.0017304	1.1298e-11	330069	-2.949	0.003186
6	109000316	rs9398173	C	T	0.69948	-0.012151	0.001791	1.16413e-11	330069	5.923	3.16e-09
2	104333008	rs12996607	C	G	0.47257	0.011847	0.0017462	1.1695e-11	330069	1.119	0.2633
2	104349411	rs4851663	C	G	0.46172	0.011843	0.0017463	1.18577e-11	330069	1.157	0.2471
2	104341029	rs2125013	C	T	0.46076	0.011845	0.0017469	1.1995e-11	330069	1.212	0.2257
2	104340676	rs6713896	C	A	0.46076	0.011844	0.0017469	1.20226e-11	330069	1.21	0.2264
2	104341424	rs1947566	G	C	0.46079	0.011842	0.0017469	1.21339e-11	330069	1.212	0.2253
9	76894518	rs513987	G	A	0.74513	0.011721	0.0017292	1.2218e-11	330069	-3.086	0.002031
2	104340412	rs9941537	C	T	0.46083	0.011839	0.0017468	1.2218e-11	330069	1.212	0.2257
2	104266788	rs1673468	C	T	0.48293	0.011839	0.0017467	1.2218e-11	330069	0.883	0.3772
9	76903371	rs641494	A	T	0.74382	0.011726	0.0017304	1.23027e-11	330069	-2.967	0.003009
2	104266890	rs1673469	T	A	0.48218	0.011841	0.0017475	1.2388e-11	330069	0.883	0.377
6	108999287	rs1935949	G	A	0.69876	-0.012157	0.0017947	1.25603e-11	330069	5.734	9.814e-09
2	104348025	rs12616436	C	T	0.4606	0.011834	0.001747	1.25893e-11	330069	1.176	0.2396
6	108988184	rs2153960	A	G	0.69568	-0.012172	0.0017972	1.26474e-11	330069	5.747	9.1e-09
6	108999101	rs1935951	A	G	0.69876	-0.012152	0.0017947	1.28233e-11	330069	5.715	1.095e-08
2	104324926	rs13012192	G	A	0.46164	0.011822	0.0017461	1.28529e-11	330069	1.225	0.2206
6	108998266	rs3800231	G	A	0.69875	-0.01215	0.0017948	1.29122e-11	330069	5.712	1.118e-08
6	109002042	rs4945816	T	C	0.69798	-0.012162	0.0017966	1.2942e-11	330069	5.73	1.002e-08
6	108996963	rs3800229	T	G	0.69876	-0.012146	0.0017948	1.31522e-11	330069	5.727	1.024e-08
2	104345661	rs4014035	G	A	0.46069	0.011822	0.001747	1.31826e-11	330069	1.2	0.2302
2	104345435	rs4014034	C	A	0.46078	0.01182	0.001747	1.32739e-11	330069	1.204	0.2285
2	104342066	rs9941552	G	A	0.46091	0.011818	0.0017469	1.33045e-11	330069	1.141	0.2539
2	104341997	rs12987855	A	G	0.46091	0.011818	0.0017469	1.33352e-11	330069	1.208	0.2271
6	108997611	rs9400240	A	G	0.69874	-0.01214	0.0017948	1.34586e-11	330069	5.72	1.063e-08
6	108997435	rs9374040	A	G	0.6987	-0.012138	0.0017948	1.35519e-11	330069	5.706	1.154e-08
12	111993886	rs593226	G	A	0.26864	-0.01242	0.0018371	1.37404e-11	330069	-1.821	0.06866
2	104292134	rs264933	C	T	0.47294	0.011802	0.0017456	1.37404e-11	330069	1.173	0.2407
6	108994826	rs9398172	A	G	0.69871	-0.012131	0.0017945	1.38357e-11	330069	5.725	1.031e-08
6	108998905	rs1935952	C	G	0.69796	-0.012143	0.0017967	1.39959e-11	330069	5.741	9.397e-09
9	76888531	rs657145	G	T	0.74463	0.011688	0.0017294	1.39959e-11	330069	-3.041	0.002361
2	104332651	rs12990802	C	G	0.46073	0.011799	0.0017469	1.43549e-11	330069	1.219	0.2228
2	104334010	rs1379429	A	G	0.46068	0.011799	0.0017469	1.43549e-11	330069	1.198	0.231
5	112029106	rs1530256	G	T	0.49335	-0.01182	0.0017511	1.48252e-11	330069	NA	NA
12	111949394	rs678436	C	T	0.26918	-0.01238	0.001837	1.59588e-11	330069	-1.843	0.06528
12	111982813	rs629404	A	T	0.26852	-0.012368	0.001837	1.67109e-11	330069	-1.745	0.08104
9	76905178	rs2604265	G	A	0.74304	0.011645	0.0017305	1.71002e-11	330069	-2.924	0.003453
6	108994433	rs35396874	T	C	0.69792	-0.012088	0.0017968	1.72584e-11	330069	5.779	7.509e-09
5	112006815	rs11749632	A	G	0.47364	0.01173	0.0017436	1.7338e-11	330069	-1.016	0.3098
2	104333681	rs9789519	G	A	0.45973	0.011753	0.0017473	1.7378e-11	330069	1.18	0.2381
6	109005588	rs1062034	G	A	0.30696	0.012081	0.0017964	1.75388e-11	330069	-5.67	1.43e-08
2	104281272	rs264927	C	T	0.46397	0.011736	0.0017454	1.77419e-11	330069	1.197	0.2315
2	59961634	rs4672310	T	C	0.49249	0.011688	0.0017409	1.90546e-11	330069	-1.62	0.1052
9	76897503	rs7859799	T	C	0.73049	0.0119	0.001773	1.92752e-11	330069	-2.857	0.004282
5	112008466	rs11241178	T	G	0.47355	0.011687	0.0017437	2.05116e-11	330069	-1.01	0.3127
5	112030173	rs2099810	G	A	0.49087	-0.011733	0.0017507	2.06063e-11	330069	0.663	0.5075
5	112008928	rs35935095	T	C	0.47355	0.011685	0.0017437	2.07014e-11	330069	-1.018	0.3088
2	104282744	rs264928	G	C	0.46218	0.011685	0.0017457	2.18273e-11	330069	1.188	0.2348
9	76897070	rs4013967	G	A	0.73057	0.011848	0.0017726	2.33346e-11	330069	-2.863	0.004197
17	44614265	rs147134771	T	G	0.50684	0.011689	0.0017514	2.48886e-11	330069	-0.974	0.3302
2	104374272	rs677522	A	G	0.457	0.011633	0.0017462	2.71019e-11	330069	1.264	0.2064
5	112033044	rs10051624	C	G	0.50058	-0.01166	0.0017504	2.71644e-11	330069	0.919	0.358
5	112009271	rs62363971	G	A	0.47596	0.011595	0.0017438	2.94442e-11	330069	-0.867	0.3859
12	111926901	rs1029388	C	T	0.22828	-0.012157	0.0018291	3.00608e-11	330069	-1.59	0.1119
2	104375723	rs650576	A	T	0.45652	0.011602	0.0017461	3.04089e-11	330069	1.22	0.2226
5	112176756	rs459552	A	T	0.77462	-0.011523	0.0017343	3.04789e-11	330069	-1.155	0.2483
5	112057425	rs11241182	C	A	0.48521	-0.011617	0.0017484	3.04789e-11	330069	0.386	0.6992
5	112023120	rs10477483	G	A	0.48767	-0.011618	0.0017504	3.1989e-11	330069	0.529	0.5971
5	112029044	rs1968557	T	C	0.48823	-0.011617	0.0017506	3.22849e-11	330069	0.79	0.4296
6	109018859	rs1268174	G	A	0.35362	0.011719	0.0017671	3.3266e-11	330069	-4.501	6.767e-06
5	112021979	rs12332692	C	T	0.48811	-0.011607	0.0017505	3.34195e-11	330069	0.498	0.6183
12	49385679	rs10875906	T	C	0.27675	0.01156	0.0017455	3.53183e-11	330069	3.843	0.0001216
5	112060294	rs10075323	C	G	0.47196	-0.011576	0.0017478	3.53183e-11	330069	0.4	0.6889
5	112023011	rs1441367	A	G	0.4853	-0.011584	0.0017503	3.64754e-11	330069	0.606	0.5442
2	201240086	rs994280	G	A	0.33833	0.011534	0.0017428	3.65595e-11	330069	-2.725	0.006421
12	111878526	rs7296313	C	T	0.22524	-0.011992	0.0018124	3.68129e-11	330069	-1.539	0.1237
5	112035868	rs12658609	A	G	0.50137	-0.011582	0.0017506	3.68978e-11	330069	0.911	0.3624
12	49478658	rs6580698	C	T	0.43963	0.011542	0.0017454	3.77572e-11	330069	5.773	7.79e-09
6	109018322	rs1268175	G	A	0.3531	0.011673	0.0017657	3.81944e-11	330069	-4.529	5.926e-06
6	108983527	rs9398171	T	C	0.69663	-0.011828	0.0017893	3.83707e-11	330069	5.864	4.51e-09
5	111995081	rs4705772	A	G	0.51615	-0.011493	0.0017405	4.02717e-11	330069	0.591	0.5548
6	109018046	rs1268176	A	G	0.35427	0.011692	0.0017713	4.09261e-11	330069	-4.643	3.44e-06
5	111988946	rs6893949	A	T	0.52523	-0.011493	0.0017414	4.12098e-11	330069	0.719	0.4723
5	112010749	rs13166447	A	G	0.4583	0.011497	0.001742	4.12098e-11	330069	-0.518	0.6043
5	112023761	rs10072068	A	G	0.48509	-0.011545	0.0017496	4.14954e-11	330069	0.646	0.518
17	44058928	rs2435207	A	G	0.31372	-0.011424	0.0017313	4.16869e-11	330069	4.877	1.078e-06
5	112060242	rs10075281	A	G	0.4722	-0.011533	0.0017479	4.16869e-11	330069	0.349	0.7275
5	112041171	rs10213844	A	G	0.49855	-0.011542	0.0017499	4.23643e-11	330069	1.033	0.3015
2	104072110	rs2672852	T	C	0.51244	0.01156	0.0017527	4.2462e-11	330069	0.579	0.5628
5	112024251	rs13173990	G	C	0.48749	-0.011541	0.00175	4.27563e-11	330069	0.498	0.6184
5	112060421	rs10075377	T	G	0.47217	-0.011525	0.0017479	4.30527e-11	330069	0.354	0.7236
6	109017284	rs1268178	G	T	0.35313	0.011634	0.0017654	4.40555e-11	330069	-4.542	5.561e-06
12	111893537	rs10849949	G	A	0.22794	-0.012056	0.0018295	4.40555e-11	330069	-1.626	0.1039
5	112024192	rs13156251	C	T	0.48713	-0.011532	0.0017509	4.50817e-11	330069	0.47	0.6386
12	111910912	rs10849951	A	G	0.22772	-0.012043	0.0018292	4.59198e-11	330069	-1.488	0.1368
6	109017237	rs1268179	C	G	0.35433	0.011655	0.0017712	4.70977e-11	330069	-4.535	5.748e-06
2	59952846	rs6545747	A	C	0.49262	0.011444	0.0017399	4.7863e-11	330069	-1.424	0.1544
5	112041841	rs6862050	G	A	0.49862	-0.01151	0.0017499	4.79733e-11	330069	1.04	0.2985
5	112038837	rs12513787	A	G	0.49823	-0.011515	0.0017507	4.79733e-11	330069	1.023	0.3065
6	109017322	rs1268177	G	A	0.35445	0.011642	0.0017712	4.94311e-11	330069	-4.535	5.771e-06
9	76826812	rs10781197	T	G	0.72815	0.011523	0.0017534	4.98884e-11	330069	-2.768	0.005633
12	111901204	rs1557685	A	C	0.22774	-0.012019	0.0018291	5.01187e-11	330069	-1.537	0.1242
12	49478812	rs6580699	G	T	0.43722	0.01146	0.0017444	5.05825e-11	330069	5.716	1.091e-08
12	111864684	rs10849947	C	T	0.22771	-0.012011	0.0018295	5.21195e-11	330069	-1.53	0.126
12	111895203	rs2301622	G	C	0.22782	-0.012008	0.0018295	5.24807e-11	330069	-1.537	0.1242
2	104059441	rs4851649	T	G	0.51025	0.011497	0.0017521	5.33335e-11	330069	0.571	0.5679
12	111847740	rs3803170	G	A	0.22762	-0.011994	0.0018292	5.49541e-11	330069	-1.458	0.1447
12	111849515	rs7309325	T	G	0.22741	-0.011986	0.0018291	5.64937e-11	330069	-1.458	0.1449
12	111920168	rs7976462	T	G	0.22776	-0.011987	0.0018294	5.67545e-11	330069	-1.513	0.1303
12	111910590	rs111818253	G	C	0.21919	-0.011698	0.0017864	5.83445e-11	330069	-1.569	0.1166
12	111882485	rs2238154	A	C	0.22751	-0.011961	0.0018285	6.10942e-11	330069	-1.526	0.127
5	112022255	rs971517	G	C	0.54206	-0.011383	0.0017402	6.1235e-11	330069	0.83	0.4063
12	49477334	rs7300136	C	T	0.43722	0.011407	0.0017441	6.13762e-11	330069	5.798	6.694e-09
12	111943004	rs587914	C	T	0.22786	-0.011966	0.0018294	6.13762e-11	330069	-1.459	0.1445
6	108977663	rs9400239	C	T	0.69126	-0.011679	0.0017859	6.16595e-11	330069	6.194	5.864e-10
9	76827765	rs7034956	G	C	0.7284	0.011466	0.0017535	6.19441e-11	330069	-2.735	0.006245
12	49476629	rs10875918	A	G	0.43682	0.0114	0.0017437	6.23735e-11	330069	5.793	6.929e-09
5	112016995	rs17285505	G	C	0.49836	0.011389	0.0017419	6.23735e-11	330069	-0.627	0.5307
12	111887659	rs739496	G	A	0.21935	-0.011675	0.0017859	6.26614e-11	330069	-1.634	0.1023
9	76827499	rs7033714	A	G	0.72849	0.011459	0.0017534	6.35331e-11	330069	-2.735	0.006241
2	59988258	rs12474507	T	C	0.39402	0.011352	0.0017376	6.44169e-11	330069	-1.265	0.2059
5	112060624	rs4705573	C	T	0.4734	-0.011418	0.0017488	6.63743e-11	330069	0.352	0.725
9	76804352	rs4410970	C	A	0.72907	0.011423	0.0017501	6.71429e-11	330069	-2.613	0.008978
9	76837903	rs10869354	C	T	0.72796	0.011467	0.0017573	6.79204e-11	330069	-2.832	0.004627
12	111875410	rs10849948	G	A	0.22825	-0.011922	0.0018274	6.85488e-11	330069	-1.53	0.1259
9	76802887	rs7853180	A	G	0.72899	0.011418	0.0017503	6.87068e-11	330069	-2.614	0.008948
9	76819701	rs4570228	G	A	0.72444	0.011555	0.0017715	6.91831e-11	330069	-2.632	0.008497
5	112122532	rs2707765	C	G	0.49287	-0.011415	0.0017502	6.93426e-11	330069	0.851	0.395
9	76799707	rs4237261	C	T	0.72907	0.011413	0.0017501	6.96627e-11	330069	-2.594	0.009499
17	44652651	rs112458826	C	G	0.55183	0.011478	0.0017604	7.03072e-11	330069	-1.863	0.06252
9	76808371	rs4628315	A	G	0.72587	0.011503	0.0017645	7.09578e-11	330069	-2.552	0.01072
9	76801141	rs4344143	T	C	0.72898	0.011408	0.0017503	7.14496e-11	330069	-2.605	0.009185
12	111871141	rs4766462	T	A	0.22762	-0.011917	0.0018287	7.19449e-11	330069	-1.512	0.1305
2	201160771	rs1367858	T	C	0.33693	0.011333	0.0017397	7.29458e-11	330069	-2.587	0.009687
5	112050122	rs4705559	G	A	0.49531	-0.011404	0.0017506	7.31139e-11	330069	0.66	0.5092
9	76817927	rs10746941	A	C	0.72563	0.011501	0.0017655	7.32825e-11	330069	-2.598	0.009369
9	76817230	rs4745293	A	G	0.72564	0.011502	0.0017657	7.32825e-11	330069	-2.588	0.009656
9	76800597	rs7046886	A	G	0.72554	0.011501	0.0017655	7.32825e-11	330069	-2.566	0.01029
5	112024075	rs4705815	G	T	0.53558	-0.011356	0.0017432	7.32825e-11	330069	0.73	0.4655
5	112026148	rs1866924	A	G	0.48425	-0.011401	0.0017502	7.32825e-11	330069	0.574	0.5662
9	76819681	rs4237264	A	G	0.72442	0.011539	0.0017715	7.36207e-11	330069	-2.632	0.008491
12	111946435	rs614591	G	A	0.22776	-0.011916	0.0018295	7.36207e-11	330069	-1.495	0.1348
9	76800566	rs7036189	C	T	0.72551	0.011499	0.0017657	7.39605e-11	330069	-2.557	0.01055
9	76817723	rs10746940	G	A	0.72807	0.011425	0.0017543	7.4131e-11	330069	-2.629	0.008565
9	76799817	rs4237262	A	G	0.72556	0.011498	0.0017657	7.43019e-11	330069	-2.565	0.01031
9	76806559	rs7848271	T	C	0.72912	0.011397	0.0017502	7.44732e-11	330069	-2.573	0.01007
6	109007304	rs1268171	G	C	0.35616	0.011504	0.0017672	7.53356e-11	330069	-4.498	6.846e-06
9	76806070	rs6560375	G	T	0.72916	0.011391	0.00175	7.58578e-11	330069	-2.595	0.00947
6	109008232	rs1268166	C	T	0.35617	0.011502	0.0017673	7.60326e-11	330069	-4.522	6.134e-06
5	112095140	rs6879057	T	C	0.49261	-0.01139	0.0017502	7.63836e-11	330069	0.745	0.4565
9	76811790	rs4745292	T	C	0.72584	0.011482	0.0017646	7.67361e-11	330069	-2.63	0.008529
5	112050465	rs7704618	G	T	0.49523	-0.011393	0.001751	7.70903e-11	330069	0.656	0.5121
12	111844218	rs3742003	A	G	0.2272	-0.01189	0.0018278	7.7983e-11	330069	-1.5	0.1336
9	76810697	rs4543604	C	T	0.72565	0.011483	0.0017657	7.85236e-11	330069	-2.545	0.01093
6	109008378	rs1268165	C	T	0.35622	0.011492	0.0017672	7.8886e-11	330069	-4.506	6.607e-06
2	104070408	rs13032356	T	C	0.51087	0.011392	0.0017519	7.90679e-11	330069	0.655	0.5125
9	76793127	rs2045191	C	T	0.72861	0.011379	0.00175	7.94328e-11	330069	-2.652	0.008005
9	76820753	rs4320613	C	G	0.72772	0.011417	0.001756	7.94328e-11	330069	-2.591	0.009574
9	76820488	rs4319168	T	G	0.72843	0.011398	0.0017531	7.96159e-11	330069	-2.668	0.007625
6	109008158	rs1268168	A	G	0.35623	0.011488	0.0017672	8.01678e-11	330069	-4.512	6.418e-06
2	104071129	rs11685036	C	G	0.51103	0.011388	0.001752	8.05378e-11	330069	0.654	0.5132
6	109008416	rs1268164	G	A	0.35621	0.011486	0.0017672	8.07235e-11	330069	-4.541	5.602e-06
2	104071536	rs2672847	G	A	0.511	0.011387	0.001752	8.07235e-11	330069	0.652	0.5143
6	109007977	rs1268169	G	T	0.35625	0.011486	0.0017673	8.09096e-11	330069	-4.464	8.049e-06
5	112079882	rs10071425	G	T	0.49467	-0.011382	0.0017514	8.10961e-11	330069	0.727	0.4669
2	104059758	rs12622015	G	A	0.511	0.011387	0.0017522	8.10961e-11	330069	0.64	0.5225
2	104058510	rs2217683	A	G	0.51101	0.011386	0.0017522	8.12831e-11	330069	0.631	0.528
5	112077447	rs4705608	A	T	0.49459	-0.011378	0.0017512	8.18465e-11	330069	0.734	0.4629
9	76796661	rs7018867	C	T	0.72878	0.011367	0.0017497	8.22243e-11	330069	-2.56	0.01047
6	108974746	rs4946932	C	A	0.69123	-0.011598	0.0017854	8.26038e-11	330069	6.259	3.877e-10
2	104069913	rs266068	C	G	0.51174	0.011369	0.0017503	8.27942e-11	330069	0.641	0.5212
6	109008998	rs1268163	T	C	0.35522	0.011454	0.0017634	8.29851e-11	330069	-4.486	7.257e-06
9	76795180	rs10746939	C	A	0.72879	0.01136	0.0017497	8.43335e-11	330069	-2.61	0.009049
9	76795818	rs10781194	A	T	0.72879	0.01136	0.0017497	8.43335e-11	330069	-2.608	0.009114
9	76792734	rs2045192	A	C	0.72874	0.01136	0.00175	8.51138e-11	330069	-2.59	0.009584
6	108974098	rs13217795	T	C	0.69302	-0.011573	0.0017828	8.531e-11	330069	6.217	5.082e-10
6	109007522	rs1268170	G	A	0.35633	0.011471	0.0017672	8.55067e-11	330069	-4.511	6.467e-06
6	109008183	rs1268167	A	G	0.3563	0.01147	0.0017673	8.59014e-11	330069	-4.523	6.107e-06
5	112096626	rs2901844	T	C	0.49238	-0.011359	0.0017501	8.59014e-11	330069	0.75	0.4535
5	112097757	rs11241184	G	A	0.50532	-0.011359	0.0017506	8.64968e-11	330069	0.538	0.5908
5	112074722	rs1974786	G	C	0.49282	-0.011365	0.0017515	8.66962e-11	330069	0.831	0.4059
9	76795159	rs10746938	T	C	0.72425	0.01149	0.0017709	8.6896e-11	330069	-2.589	0.009625
5	112077920	rs4705610	C	G	0.49496	-0.011356	0.0017504	8.70964e-11	330069	0.445	0.6567
2	104061378	rs13031874	T	A	0.51097	0.011368	0.0017522	8.72971e-11	330069	0.637	0.5239
9	76792227	rs10746937	C	T	0.72871	0.011352	0.0017499	8.77001e-11	330069	-2.674	0.007501
9	76791828	rs2045193	C	T	0.72881	0.011352	0.00175	8.77001e-11	330069	-2.662	0.007763
9	76792670	rs10781193	G	C	0.72423	0.011488	0.0017709	8.77001e-11	330069	-2.607	0.009146
12	49472965	rs11168850	A	G	0.43667	0.011304	0.0017428	8.8308e-11	330069	5.925	3.12e-09
6	109013664	rs2207731	G	A	0.35895	0.011522	0.0017765	8.8308e-11	330069	-4.492	7.049e-06
5	112081924	rs6594646	G	A	0.49284	-0.011359	0.0017515	8.85116e-11	330069	0.742	0.4584
5	112092402	rs4705486	G	T	0.49478	-0.011357	0.0017512	8.87156e-11	330069	0.66	0.5094
12	49467076	rs10459232	C	A	0.43643	0.011297	0.0017425	8.97429e-11	330069	5.94	2.847e-09
9	76795970	rs10781195	A	C	0.72528	0.011444	0.0017651	8.97429e-11	330069	-2.651	0.008018
2	104056769	rs6752675	A	G	0.51308	0.011335	0.0017488	9.07821e-11	330069	0.607	0.544
2	201232862	rs296790	G	C	0.55825	-0.011305	0.0017446	9.2045e-11	330069	2.268	0.02334
9	76797748	rs7851324	C	T	0.72878	0.011336	0.0017497	9.24698e-11	330069	-2.626	0.008652
12	112024384	rs11065967	T	G	0.77676	0.011863	0.0018313	9.31108e-11	330069	1.347	0.1781
6	108945370	rs2022464	C	A	0.69243	-0.011526	0.0017793	9.33254e-11	330069	6.333	2.403e-10
5	112061448	rs11749701	G	C	0.49495	-0.011336	0.0017511	9.57194e-11	330069	0.632	0.5272
6	109006838	rs1159806	T	A	0.35721	0.011469	0.0017726	9.7949e-11	330069	-4.413	1.018e-05
2	104064726	rs1368549	T	G	0.51219	0.011319	0.0017499	9.90832e-11	330069	0.595	0.5517
2	104070047	rs817224	T	A	0.51037	0.011328	0.001752	1.00786e-10	330069	0.628	0.5303
2	201233502	rs295132	A	G	0.5583	-0.011279	0.0017447	1.01461e-10	330069	2.194	0.02827
5	112026480	rs12719151	C	T	0.5398	-0.011249	0.00174	1.01461e-10	330069	0.795	0.4268
5	112086165	rs12518091	A	T	0.49491	-0.011321	0.0017511	1.01485e-10	330069	0.711	0.4771
12	112019799	rs12369009	T	G	0.7767	0.011836	0.0018313	1.0266e-10	330069	1.275	0.2022
12	112014501	rs12816310	T	C	0.77673	0.011834	0.0018313	1.03371e-10	330069	1.224	0.2211
2	201160499	rs11888462	T	G	0.42798	0.011291	0.0017472	1.03395e-10	330069	-2.17	0.02997
6	109019323	rs473268	A	C	0.34864	0.011393	0.0017635	1.04376e-10	330069	-4.638	3.522e-06
2	201160765	rs1367857	C	T	0.42749	0.011287	0.0017474	1.05293e-10	330069	-2.127	0.03338
5	112056360	rs9326863	T	G	0.50397	-0.011311	0.0017516	1.06512e-10	330069	0.671	0.5021
5	112098938	rs9647582	A	T	0.49455	-0.011308	0.0017512	1.06561e-10	330069	0.607	0.5441
12	111965658	rs657197	A	C	0.22372	-0.011822	0.0018308	1.06635e-10	330069	-1.362	0.1731
5	112099028	rs9647583	G	A	0.49451	-0.011307	0.0017512	1.07127e-10	330069	0.661	0.5086
2	104070010	rs2138108	A	G	0.51111	0.011302	0.0017504	1.07177e-10	330069	0.647	0.5174
5	112118956	rs2431512	T	C	0.49752	-0.011305	0.0017512	1.07994e-10	330069	0.623	0.533
5	112024150	rs4705816	T	G	0.53924	-0.011227	0.00174	1.10332e-10	330069	0.737	0.4613
2	201229473	rs295129	A	G	0.55815	-0.011255	0.0017446	1.11045e-10	330069	2.248	0.02461
6	108965039	rs10457180	A	G	0.68936	-0.011575	0.0017947	1.12357e-10	330069	6.325	2.526e-10
2	104070012	rs2138109	G	A	0.51113	0.011289	0.0017504	1.12564e-10	330069	0.629	0.5291
2	201160739	rs1367856	A	T	0.42728	0.011264	0.0017477	1.15878e-10	330069	-2.145	0.03198
12	112003383	rs616513	T	G	0.22349	-0.011801	0.0018317	1.17788e-10	330069	-1.359	0.1741
2	201181428	rs3769476	C	T	0.42662	0.01126	0.0017479	1.17951e-10	330069	-2.095	0.03619
5	112116773	rs2289484	G	A	0.50904	-0.011276	0.0017507	1.19152e-10	330069	0.458	0.6471
2	201171207	rs12614621	C	G	0.42679	0.011252	0.0017477	1.21143e-10	330069	-2.136	0.0327
12	111952167	rs630512	T	C	0.22388	-0.011791	0.0018315	1.21339e-10	330069	-1.415	0.1571
2	201191034	rs1431766	G	A	0.42679	0.01125	0.0017476	1.21507e-10	330069	-2.073	0.03816
2	201161371	rs7559005	T	C	0.42728	0.011249	0.0017474	1.21619e-10	330069	-2.156	0.03112
5	112097234	rs28578275	A	G	0.49234	-0.011272	0.0017511	1.21731e-10	330069	0.737	0.4614
5	112038904	rs12513804	C	G	0.55016	-0.011196	0.0017397	1.2314e-10	330069	1.304	0.1922
5	112095775	rs4705624	A	T	0.49247	-0.011269	0.0017511	1.23225e-10	330069	0.729	0.4661
12	111963936	rs863691	C	T	0.22336	-0.011782	0.0018312	1.24308e-10	330069	-1.349	0.1775
5	112074269	rs2019720	G	A	0.49268	-0.011264	0.0017513	1.26532e-10	330069	0.774	0.4387
2	201185919	rs13028959	A	C	0.42658	0.011241	0.0017479	1.26561e-10	330069	-2.038	0.04153
2	201183701	rs7578220	G	A	0.42684	0.011239	0.0017477	1.26824e-10	330069	-2.071	0.0384
12	112008242	rs650887	T	C	0.22366	-0.01178	0.0018317	1.2697e-10	330069	-1.347	0.178
5	112180921	rs41116	C	T	0.49517	-0.01126	0.0017514	1.28529e-10	330069	0.773	0.4393
2	201171014	rs3739121	C	G	0.42686	0.011235	0.0017477	1.29092e-10	330069	-2.134	0.03282
2	201171651	rs74853338	T	C	0.42686	0.011235	0.0017477	1.29122e-10	330069	-2.039	0.04147
2	201186572	rs1347551	T	C	0.34236	0.011215	0.0017446	1.29181e-10	330069	-2.829	0.004667
2	201172628	rs7580924	C	G	0.42686	0.011233	0.0017477	1.29987e-10	330069	-2.132	0.033
12	111951850	rs628825	T	C	0.22385	-0.011771	0.0018315	1.30227e-10	330069	-1.387	0.1653
2	201160699	rs295140	C	T	0.56976	-0.011217	0.0017454	1.30798e-10	330069	2.204	0.02755
2	201172086	rs67190025	T	C	0.42687	0.011229	0.0017477	1.31704e-10	330069	-2.126	0.0335
12	111974823	rs619010	G	A	0.2236	-0.011769	0.0018317	1.31704e-10	330069	-1.323	0.186
2	201176901	rs10931899	T	C	0.42692	0.011223	0.0017476	1.35021e-10	330069	-2.107	0.03513
2	201177193	rs10931900	C	T	0.42694	0.011223	0.0017477	1.35145e-10	330069	-2.059	0.03947
2	201177653	rs7599609	A	G	0.42695	0.011222	0.0017477	1.3555e-10	330069	-2.094	0.03624
2	201173048	rs3769483	G	A	0.34243	0.011202	0.0017447	1.35894e-10	330069	-2.887	0.003887
2	201173100	rs3769482	G	C	0.34243	0.011202	0.0017448	1.35925e-10	330069	-2.886	0.003902
5	112111866	rs458906	C	G	0.49781	-0.011244	0.0017513	1.35925e-10	330069	0.523	0.6009
5	112181379	rs448475	G	C	0.49553	-0.011238	0.0017504	1.36427e-10	330069	0.814	0.4157
2	201171355	rs12618057	C	T	0.42722	0.011216	0.0017475	1.37689e-10	330069	-2.158	0.0309
2	201172999	rs3769484	T	C	0.34246	0.011198	0.0017448	1.38293e-10	330069	-2.89	0.003854
2	201168695	rs55677233	C	T	0.42687	0.011214	0.0017477	1.39573e-10	330069	-2.124	0.03369
2	201167854	rs6435048	T	C	0.34239	0.011194	0.0017448	1.40475e-10	330069	-2.853	0.004329
2	201163920	rs4516413	C	T	0.42708	0.011211	0.0017475	1.40605e-10	330069	-2.147	0.03181
2	201164696	rs13005573	C	G	0.42686	0.01121	0.0017477	1.41416e-10	330069	-2.141	0.03225
2	201164570	rs13026151	A	T	0.4271	0.011209	0.0017475	1.41482e-10	330069	-2.138	0.03249
5	112107058	rs11241185	A	G	0.49609	-0.011231	0.0017514	1.43054e-10	330069	0.691	0.4897
2	201167772	rs7584810	A	G	0.42665	0.011207	0.0017479	1.43847e-10	330069	-2.134	0.03288
2	201193373	rs3769472	A	G	0.34243	0.011186	0.0017445	1.43913e-10	330069	-2.776	0.005508
5	112107726	rs2439589	T	C	0.49602	-0.011229	0.0017513	1.44145e-10	330069	0.685	0.4936
2	201163812	rs4673906	T	G	0.4271	0.011195	0.0017475	1.49383e-10	330069	-2.137	0.03256
5	112161469	rs2546108	A	C	0.49266	-0.011213	0.0017504	1.49486e-10	330069	0.924	0.3557
5	112116024	rs62364017	T	C	0.52178	-0.011172	0.0017441	1.50141e-10	330069	1.054	0.2919
9	76858063	rs1598287	T	C	0.72754	0.011254	0.0017582	1.54739e-10	330069	-2.773	0.005562
5	112089282	rs11241183	C	T	0.49318	-0.011206	0.0017512	1.56423e-10	330069	0.484	0.6285
5	112131288	rs2431514	G	A	0.53327	-0.011214	0.001753	1.58818e-10	330069	0.564	0.5729
6	109015223	rs1268180	G	C	0.34844	0.011266	0.0017619	1.61659e-10	330069	-4.614	3.947e-06
12	49464449	rs7969091	G	A	0.4293	0.011155	0.0017446	1.61771e-10	330069	5.915	3.327e-09
19	4056366	rs66534382	A	G	0.19456	-0.011182	0.0017494	1.63606e-10	330069	3.919	8.883e-05
5	112101457	rs12659119	T	G	0.53891	-0.011166	0.0017473	1.65577e-10	330069	0.783	0.4337
12	111930400	rs7138498	C	T	0.22659	-0.011692	0.0018301	1.67687e-10	330069	-1.413	0.1576
2	201162433	rs11696001	A	G	0.42661	0.011158	0.0017479	1.7334e-10	330069	-2.143	0.03208
6	109009194	rs1268162	G	A	0.3628	0.01134	0.0017768	1.75025e-10	330069	-4.767	1.866e-06
12	49466994	rs10459221	G	C	0.42919	0.011134	0.0017446	1.75267e-10	330069	5.813	6.138e-09
2	59970660	rs1442883	A	C	0.25029	0.011064	0.0017339	1.76035e-10	330069	-1.972	0.04866
12	49467330	rs10875917	T	G	0.42919	0.011129	0.0017446	1.78197e-10	330069	5.804	6.468e-09
9	76891412	rs2604271	T	C	0.82868	0.010993	0.0017236	1.79597e-10	330069	-2.64	0.008303
5	112164862	rs351772	A	G	0.49276	-0.011152	0.0017497	1.84969e-10	330069	0.923	0.3559
5	112108865	rs2707763	C	T	0.50747	-0.011159	0.0017508	1.85353e-10	330069	0.542	0.5879
2	174928752	rs77998199	G	A	0.19307	0.010943	0.0017195	1.96607e-10	330069	-1.353	0.176
6	108861264	rs1575676	T	C	0.37776	0.011183	0.0017577	1.98793e-10	330069	-7.493	6.754e-14
2	104336753	rs10865054	G	A	0.44123	0.011111	0.0017468	2.00909e-10	330069	0.766	0.4436
2	201083598	rs1729412	C	T	0.57576	-0.011091	0.0017445	2.05353e-10	330069	2.432	0.01504
9	76921748	rs10869382	A	G	0.74957	0.011161	0.0017558	2.06443e-10	330069	-2.432	0.015
5	112103680	rs2431239	A	G	0.49622	-0.011133	0.0017515	2.06776e-10	330069	0.668	0.5041
2	201162520	rs10931897	C	T	0.42724	0.011107	0.0017476	2.08065e-10	330069	-1.985	0.0472
12	111855461	rs7299849	T	A	0.2093	-0.011111	0.0017486	2.09942e-10	330069	-1.402	0.1609
5	112104297	rs35414976	G	A	0.49676	-0.011121	0.0017504	2.10378e-10	330069	0.685	0.4936
2	201081745	rs952530	T	C	0.57577	-0.011081	0.0017445	2.12961e-10	330069	2.447	0.0144
5	112131787	rs2464803	G	A	0.52238	-0.011138	0.0017537	2.13845e-10	330069	0.595	0.5518
9	76921722	rs10869381	C	T	0.74954	0.011144	0.0017558	2.19938e-10	330069	-2.418	0.01559
9	76921309	rs10781218	T	C	0.74961	0.011142	0.0017557	2.20597e-10	330069	-2.423	0.01539
5	112113735	rs396321	T	C	0.50657	-0.011115	0.0017517	2.22382e-10	330069	0.629	0.5294
2	201080113	rs1729421	C	G	0.57573	-0.011067	0.0017444	2.23924e-10	330069	2.472	0.01345
5	112058410	rs6898133	G	C	0.52372	-0.011039	0.0017412	2.3025e-10	330069	0.662	0.5082
6	108927842	rs2764261	G	A	0.61285	-0.011217	0.0017695	2.31313e-10	330069	7.419	1.177e-13
12	111920295	rs7965040	C	A	0.21778	-0.011305	0.0017843	2.36537e-10	330069	-1.277	0.2016
9	76930081	rs7867719	A	G	0.74964	0.011118	0.0017553	2.39939e-10	330069	-2.523	0.01164
12	111941120	rs6490162	C	T	0.21811	-0.011304	0.0017859	2.4598e-10	330069	-1.365	0.1721
9	76925181	rs10869384	G	A	0.74959	0.011111	0.0017556	2.47002e-10	330069	-2.484	0.013
9	76924034	rs4142557	A	G	0.74946	0.011113	0.0017558	2.47116e-10	330069	-2.386	0.01703
12	111912188	rs2339816	C	T	0.20907	-0.01106	0.0017476	2.48142e-10	330069	-1.43	0.1526
19	4056207	rs67602344	A	C	0.19554	-0.011099	0.0017542	2.49862e-10	330069	3.842	0.0001221
9	76915920	rs10869378	A	T	0.74993	0.011107	0.0017554	2.50207e-10	330069	-2.431	0.01506
9	76931523	rs4493972	G	A	0.74945	0.011108	0.0017558	2.50842e-10	330069	-2.436	0.01486
5	112103963	rs2546117	G	C	0.49682	-0.011074	0.0017505	2.51536e-10	330069	0.67	0.5027
9	76932817	rs1931588	A	G	0.74981	0.011108	0.001756	2.52464e-10	330069	-2.445	0.01449
9	76927157	rs4526418	G	A	0.74966	0.011102	0.0017553	2.53863e-10	330069	-2.485	0.01296
5	112135090	rs518013	A	G	0.48923	-0.011062	0.0017499	2.59418e-10	330069	0.676	0.4993
5	112059594	rs3846716	G	A	0.52337	-0.011006	0.0017412	2.60735e-10	330069	0.624	0.5325
12	111884415	rs28362508	C	T	0.20883	-0.011036	0.0017463	2.62603e-10	330069	-1.458	0.145
9	76913729	rs6560387	A	T	0.74985	0.011087	0.0017548	2.65216e-10	330069	-2.49	0.01276
9	76912437	rs10781215	C	G	0.75051	0.011082	0.0017545	2.67793e-10	330069	-2.505	0.01226
5	112091704	rs4099181	G	C	0.54457	-0.010986	0.0017415	2.82618e-10	330069	0.917	0.3589
12	111856738	rs7973120	A	T	0.20917	-0.011022	0.0017475	2.83923e-10	330069	-1.414	0.1574
12	111894072	rs2073950	T	C	0.20917	-0.01102	0.0017477	2.88071e-10	330069	-1.457	0.145
12	111858086	rs739497	T	C	0.20907	-0.011018	0.0017475	2.88735e-10	330069	-1.406	0.1596
9	76914709	rs10781216	C	T	0.75015	0.011068	0.0017555	2.89001e-10	330069	-2.464	0.01373
5	112087327	rs11954856	G	T	0.54559	-0.010976	0.0017409	2.89401e-10	330069	0.903	0.3666
12	111927739	rs7134740	A	G	0.20921	-0.011018	0.0017481	2.92348e-10	330069	-1.429	0.153
12	111897379	rs2283357	C	G	0.20928	-0.011018	0.0017481	2.9255e-10	330069	-1.471	0.1414
19	4059164	rs10423017	T	G	0.19478	-0.011021	0.0017486	2.92954e-10	330069	3.995	6.479e-05
12	111898142	rs28521474	C	T	0.2095	-0.01102	0.0017486	2.94171e-10	330069	-1.466	0.1426
12	111895272	rs2301621	T	C	0.20937	-0.011016	0.0017483	2.95461e-10	330069	-1.471	0.1413
9	76912452	rs10869376	G	A	0.75059	0.011055	0.0017545	2.96006e-10	330069	-2.261	0.02377
5	112167587	rs548710	C	T	0.49273	-0.011034	0.0017515	2.98951e-10	330069	0.931	0.3516
19	4050424	rs72976986	A	G	0.19003	-0.01094	0.0017369	3.00608e-10	330069	3.976	7.004e-05
12	111850230	rs7977752	A	G	0.20896	-0.011011	0.0017482	3.01439e-10	330069	-1.409	0.1588
6	108926496	rs2802295	G	A	0.61483	-0.011112	0.0017643	3.01509e-10	330069	7.393	1.44e-13
5	112118195	rs2431242	A	G	0.54406	-0.010971	0.0017423	3.04299e-10	330069	0.931	0.3518
2	174972044	rs79177087	T	G	0.18904	0.010838	0.0017213	3.05703e-10	330069	-1.272	0.2033
9	76914673	rs10869377	A	G	0.75027	0.011049	0.001755	3.07114e-10	330069	-2.473	0.01341
5	112166862	rs2253987	A	G	0.49236	-0.011026	0.0017516	3.07468e-10	330069	0.947	0.3436
12	111936838	rs55851737	C	T	0.20942	-0.011003	0.0017482	3.10527e-10	330069	-1.429	0.1531
9	76919537	rs10781217	C	T	0.75004	0.011042	0.001755	3.14485e-10	330069	-2.386	0.01704
12	112016016	rs7398705	C	A	0.78585	0.01124	0.0017865	3.14992e-10	330069	1.203	0.2291
12	111849271	rs12580300	A	G	0.20893	-0.010992	0.0017477	3.18713e-10	330069	-1.396	0.1627
5	112094404	rs10073398	A	G	0.54225	-0.010953	0.0017418	3.20922e-10	330069	1.04	0.2984
12	111921926	rs11608565	A	T	0.20927	-0.010992	0.0017482	3.22626e-10	330069	-1.424	0.1545
5	112135737	rs2251913	G	A	0.48914	-0.011005	0.0017508	3.26663e-10	330069	0.662	0.5082
5	112045831	rs1465910	C	T	0.54559	-0.01094	0.0017407	3.28852e-10	330069	0.928	0.3536
12	111867487	rs2285520	T	C	0.20887	-0.010984	0.0017477	3.29155e-10	330069	-1.413	0.1577
7	44946241	rs2040879	C	T	0.81591	0.01121	0.0017841	3.31436e-10	330069	0.277	0.7815
6	108934461	rs2764264	T	C	0.68061	-0.011239	0.001789	3.33811e-10	330069	6.579	4.731e-11
12	111866087	rs73199895	A	G	0.20915	-0.010983	0.0017485	3.36047e-10	330069	-1.428	0.1533
5	112074356	rs2020383	T	C	0.54252	-0.010937	0.0017413	3.37132e-10	330069	1.104	0.2697
12	111865565	rs2283358	T	C	0.20909	-0.01098	0.0017483	3.37831e-10	330069	-1.44	0.15
12	112037000	rs695871	C	G	0.76553	0.011465	0.0018258	3.39782e-10	330069	1.255	0.2093
5	112113772	rs414098	A	G	0.49648	-0.010997	0.0017514	3.40957e-10	330069	0.648	0.5169
12	111881309	rs2239195	T	G	0.20902	-0.010974	0.001748	3.4261e-10	330069	-1.479	0.1392
2	201130210	rs12474914	G	A	0.43274	0.010954	0.0017448	3.43005e-10	330069	-2.036	0.04179
2	201129608	rs4516415	G	C	0.43272	0.010951	0.0017448	3.47616e-10	330069	-2.05	0.04036
7	44946360	rs2040880	A	G	0.81589	0.011197	0.0017841	3.48658e-10	330069	0.229	0.8185
2	201129211	rs4233994	C	G	0.43272	0.010945	0.0017448	3.55304e-10	330069	-2.101	0.03562
19	4060707	rs895330	G	C	0.19963	-0.011144	0.0017768	3.57026e-10	330069	3.938	8.233e-05
5	112109779	rs1816769	C	G	0.54524	-0.010922	0.0017415	3.58014e-10	330069	0.845	0.3981
5	112045132	rs6894351	A	G	0.54544	-0.010911	0.0017407	3.64838e-10	330069	0.91	0.3626
2	201129729	rs13007517	T	C	0.43274	0.010934	0.0017448	3.68468e-10	330069	-2.046	0.04071
12	112038676	rs12810456	A	G	0.7649	0.011432	0.001825	3.75146e-10	330069	1.32	0.1869
6	108896215	rs2802288	G	A	0.61485	-0.011052	0.0017643	3.75232e-10	330069	7.508	6.015e-14
5	112034550	rs6594643	A	C	0.55617	-0.010891	0.0017388	3.75751e-10	330069	1.453	0.1462
2	174960260	rs78164392	A	G	0.1887	0.01078	0.001721	3.76011e-10	330069	-1.317	0.1877
6	108894438	rs2764265	T	C	0.6133	-0.011082	0.0017695	3.79053e-10	330069	7.372	1.679e-13
2	174961827	rs59237936	C	T	0.18882	0.010778	0.001721	3.79228e-10	330069	-1.377	0.1686
19	4061190	rs10414261	T	C	0.19576	-0.010971	0.0017524	3.84326e-10	330069	3.911	9.19e-05
6	108895386	rs2490272	T	C	0.61406	-0.011062	0.0017671	3.8468e-10	330069	7.456	8.904e-14
6	108888593	rs2253310	G	C	0.61489	-0.011041	0.001764	3.87972e-10	330069	7.388	1.486e-13
6	108864419	rs9384679	T	C	0.37952	0.010998	0.0017575	3.91832e-10	330069	-7.629	2.364e-14
2	174977107	rs78913467	A	G	0.18912	0.010765	0.0017213	4.0059e-10	330069	-1.258	0.2083
19	4050832	rs57904377	T	C	0.19012	-0.010862	0.0017369	4.01513e-10	330069	3.906	9.369e-05
6	108905680	rs2802290	A	G	0.61484	-0.011032	0.0017643	4.03738e-10	330069	7.421	1.158e-13
12	112026383	rs7398196	G	A	0.79431	0.010935	0.0017493	4.07943e-10	330069	1.384	0.1663
2	174957028	rs75517323	G	A	0.18879	0.010757	0.0017209	4.08978e-10	330069	-1.335	0.182
2	174956548	rs115634655	A	G	0.18878	0.010757	0.0017209	4.09543e-10	330069	-1.329	0.184
2	201206706	rs11890234	T	C	0.47414	0.010922	0.0017474	4.10866e-10	330069	-2.157	0.03097
2	174955014	rs115330285	A	G	0.19102	0.010775	0.0017244	4.15241e-10	330069	-1.301	0.1934
5	112054547	rs9326862	T	A	0.52942	-0.010906	0.001746	4.20243e-10	330069	0.482	0.6296
5	112057100	rs10076641	C	T	0.54537	-0.010875	0.001741	4.2063e-10	330069	0.826	0.4086
19	4061544	rs10415135	T	C	0.19471	-0.010917	0.001748	4.23156e-10	330069	3.985	6.756e-05
2	174946760	rs11558990	C	T	0.19124	0.010766	0.0017247	4.31917e-10	330069	-1.301	0.1934
6	108908518	rs2802292	T	G	0.61479	-0.011013	0.0017643	4.32315e-10	330069	7.414	1.226e-13
2	174976987	rs17239265	C	T	0.18915	0.010743	0.0017213	4.3471e-10	330069	-1.267	0.2052
6	108994161	rs3800227	G	A	0.72986	-0.011203	0.0017953	4.37321e-10	330069	5.787	7.18e-09
5	112116069	rs35130225	A	G	0.54416	-0.010863	0.0017409	4.38127e-10	330069	1.032	0.3019
12	112023001	rs10774631	G	A	0.79435	0.010915	0.0017494	4.39137e-10	330069	1.346	0.1785
5	112034353	rs2900066	T	A	0.55647	-0.01085	0.0017392	4.41876e-10	330069	1.464	0.1432
12	112020214	rs10774629	C	G	0.79441	0.010911	0.0017493	4.46684e-10	330069	1.342	0.1795
2	174943685	rs11675247	T	C	0.19125	0.01075	0.0017247	4.57826e-10	330069	-1.305	0.1918
2	174942726	rs10930634	T	C	0.19123	0.01075	0.0017247	4.57826e-10	330069	-1.303	0.1927
2	174991914	rs75719921	C	T	0.1886	0.010726	0.0017209	4.59304e-10	330069	-1.127	0.2597
12	111846028	rs34368158	T	C	0.20901	-0.010891	0.0017478	4.62381e-10	330069	-1.454	0.146
2	174981351	rs76540327	C	T	0.18909	0.010722	0.0017214	4.7076e-10	330069	-1.202	0.2292
5	112100027	rs6867243	A	G	0.54404	-0.010839	0.0017406	4.7446e-10	330069	1.035	0.3008
12	112029291	rs7953810	C	T	0.76382	0.011353	0.001824	4.84953e-10	330069	1.329	0.1839
12	111989658	rs666727	T	C	0.21371	-0.011122	0.001787	4.86743e-10	330069	-1.205	0.2282
2	174927433	rs999549	C	G	0.81355	-0.010754	0.0017281	4.89328e-10	330069	1.271	0.2036
12	112003350	rs616559	C	T	0.21346	-0.011109	0.0017854	4.91134e-10	330069	-1.275	0.2024
5	112168065	rs2909786	G	A	0.54221	-0.010839	0.0017421	4.92493e-10	330069	1.008	0.3132
12	111969448	rs607316	T	C	0.21372	-0.01112	0.0017873	4.9306e-10	330069	-1.228	0.2193
2	174997585	rs79914545	T	C	0.18841	0.010705	0.0017207	4.93969e-10	330069	-1.129	0.259
2	175001043	rs78880283	T	C	0.18838	0.010703	0.0017208	4.97164e-10	330069	-1.151	0.2499
5	112169136	rs383256	C	T	0.54072	-0.01084	0.0017429	4.9877e-10	330069	1.025	0.3055
2	174976024	rs80228644	T	C	0.1891	0.010705	0.0017213	4.99919e-10	330069	-1.269	0.2044
5	112034596	rs6594644	G	T	0.56045	-0.010814	0.0017392	5.05243e-10	330069	1.313	0.1891
2	174976581	rs75009093	A	T	0.18911	0.010703	0.0017214	5.05941e-10	330069	-1.268	0.2048
5	112136204	rs511906	G	A	0.48944	-0.010885	0.0017508	5.07224e-10	330069	0.626	0.5313
7	44944893	rs11763472	G	A	0.81618	0.011088	0.0017839	5.12389e-10	330069	0.364	0.7159
2	175054736	rs77237375	T	C	0.19156	0.010719	0.001725	5.16297e-10	330069	-0.988	0.3233
2	174988189	rs10930639	T	C	0.18848	0.010689	0.0017207	5.2517e-10	330069	-1.144	0.2527
9	76953396	rs4351477	G	C	0.14752	-0.010658	0.0017169	5.3827e-10	330069	2.297	0.02162
5	112167821	rs569940	T	C	0.54216	-0.010814	0.0017421	5.3827e-10	330069	1.029	0.3034
2	175020992	rs77290880	A	C	0.19132	0.010705	0.0017246	5.40256e-10	330069	-1.12	0.2629
2	174954484	rs114899622	C	T	0.18878	0.010683	0.0017213	5.42375e-10	330069	-1.353	0.1761
2	174955556	rs76103937	T	G	0.18861	0.010679	0.001721	5.48277e-10	330069	-1.34	0.1803
2	175012853	rs141107817	A	G	0.18829	0.010674	0.0017208	5.53988e-10	330069	-1.182	0.2372
5	112077770	rs4705609	G	A	0.55108	-0.010801	0.0017414	5.57057e-10	330069	0.736	0.4618
5	112167941	rs2909958	G	C	0.5419	-0.010803	0.0017421	5.61565e-10	330069	1.023	0.3065
2	174934084	rs7582235	C	T	0.19364	0.010666	0.0017203	5.65458e-10	330069	-1.607	0.1082
9	76816724	rs72744343	G	A	0.17327	-0.010683	0.0017236	5.72664e-10	330069	2.282	0.02249
6	108867031	rs6911407	A	C	0.37945	0.010887	0.0017571	5.8023e-10	330069	-7.467	8.234e-14
9	76788027	rs72744331	C	T	0.16652	-0.010634	0.0017164	5.80898e-10	330069	2.533	0.01131
19	4063486	rs66833742	T	C	0.19481	-0.010841	0.0017502	5.86678e-10	330069	4.02	5.818e-05
19	4044579	rs7351050	A	G	0.16343	-0.010809	0.0017455	5.91698e-10	330069	2.943	0.003247
5	112139745	rs2545158	G	A	0.48928	-0.010835	0.0017507	6.05899e-10	330069	0.634	0.5264
5	112064475	rs861674	T	A	0.45489	0.010768	0.00174	6.07295e-10	330069	-1.049	0.294
12	112000648	rs595529	T	A	0.20541	-0.010823	0.0017495	6.16737e-10	330069	-1.45	0.1469
12	111986739	rs596831	G	C	0.2052	-0.010819	0.0017489	6.17732e-10	330069	-1.382	0.1668
12	111989979	rs848132	A	C	0.2052	-0.010818	0.0017489	6.18443e-10	330069	-1.34	0.1802
2	201124735	rs12469091	T	A	0.43256	0.010791	0.0017446	6.20297e-10	330069	-2.082	0.03737
12	111989748	rs641084	A	G	0.20541	-0.01082	0.0017495	6.23017e-10	330069	-1.337	0.1812
12	111996557	rs655107	C	T	0.20515	-0.010816	0.0017489	6.23735e-10	330069	-1.444	0.1487
12	111997023	rs642536	A	G	0.20515	-0.010816	0.0017489	6.23735e-10	330069	-1.434	0.1516
12	111997502	rs848129	C	G	0.20515	-0.010815	0.0017489	6.26614e-10	330069	-1.432	0.152
5	112144023	rs2431241	G	A	0.48936	-0.010825	0.0017507	6.29071e-10	330069	0.714	0.475
5	112144444	rs1914	T	A	0.48909	-0.010823	0.0017508	6.34454e-10	330069	0.685	0.4932
12	111984851	rs621899	C	T	0.20539	-0.010814	0.0017495	6.37382e-10	330069	-1.334	0.1822
12	111975163	rs676767	A	C	0.20534	-0.010803	0.0017494	6.60389e-10	330069	-1.356	0.1751
12	111962581	rs688812	T	C	0.20533	-0.010802	0.0017494	6.65273e-10	330069	-1.364	0.1727
12	111988432	rs625093	G	A	0.20557	-0.010802	0.0017495	6.66193e-10	330069	-1.323	0.186
12	111999570	rs610769	A	G	0.2057	-0.010799	0.0017495	6.72357e-10	330069	-1.435	0.1512
12	111989236	rs638791	G	A	0.20556	-0.010796	0.0017495	6.79516e-10	330069	-1.321	0.1865
12	111985954	rs583140	A	G	0.20368	-0.010761	0.0017446	6.90081e-10	330069	-1.341	0.1801
5	112146197	rs390092	G	T	0.48751	-0.0108	0.0017509	6.92787e-10	330069	0.783	0.4335
12	111973140	rs598711	G	A	0.20478	-0.010776	0.0017485	7.1351e-10	330069	-1.467	0.1424
12	111974280	rs616668	G	T	0.20527	-0.010777	0.0017488	7.16638e-10	330069	-1.344	0.1791
12	111973141	rs598710	C	A	0.20484	-0.010775	0.0017487	7.19118e-10	330069	-1.464	0.1432
5	112168130	rs2909787	C	G	0.53966	-0.010727	0.0017415	7.30971e-10	330069	1.193	0.2329
5	112015555	rs11743328	C	T	0.1693	0.010623	0.0017273	7.74105e-10	330069	1.27	0.2041
2	175079756	rs145495932	T	C	0.18944	0.010584	0.0017211	7.7732e-10	330069	-1.039	0.2988
19	4064057	rs56356382	C	T	0.19458	-0.010762	0.00175	7.78574e-10	330069	3.985	6.736e-05
2	175024268	rs11682383	T	C	0.18913	0.01057	0.001721	8.16582e-10	330069	-1.145	0.2523
9	76834535	rs10781202	G	C	0.81513	0.010821	0.0017621	8.22243e-10	330069	-2.253	0.02423
12	112771063	rs10850031	G	T	0.30287	-0.011109	0.0018096	8.31955e-10	330069	-0.966	0.3341
9	76798446	rs4744708	T	G	0.81828	0.010785	0.0017571	8.35603e-10	330069	-2.14	0.03233
2	201109553	rs13035874	A	G	0.34601	0.010648	0.0017351	8.42364e-10	330069	-1.055	0.2915
9	76821564	rs4308800	G	T	0.81839	0.010779	0.0017567	8.48008e-10	330069	-2.153	0.03129
9	76835970	rs10781203	A	T	0.81516	0.01081	0.001762	8.52511e-10	330069	-2.283	0.02242
9	76810363	rs7468211	C	G	0.81835	0.010779	0.001757	8.53297e-10	330069	-2.342	0.01918
9	76817505	rs4745294	T	C	0.81807	0.010782	0.0017583	8.67162e-10	330069	-2.072	0.03829
9	76836725	rs11143855	T	G	0.81514	0.010806	0.0017621	8.6856e-10	330069	-2.254	0.02422
9	76835184	rs11143852	G	A	0.81513	0.010805	0.001762	8.6876e-10	330069	-2.259	0.0239
9	76839019	rs11143858	C	A	0.81517	0.010805	0.001762	8.6896e-10	330069	-2.279	0.02267
9	76838735	rs9775788	G	A	0.81516	0.010804	0.0017621	8.71565e-10	330069	-2.294	0.02178
12	112718510	rs10850024	A	C	0.30259	-0.011089	0.0018088	8.7579e-10	330069	-0.94	0.3472
2	175023386	rs77457056	A	G	0.18905	0.010549	0.001721	8.82064e-10	330069	-1.16	0.2459
2	201076401	rs1653301	G	A	0.60619	-0.010667	0.0017407	8.90841e-10	330069	1.999	0.04556
12	112682276	rs7966422	G	A	0.30321	-0.011087	0.0018096	8.96809e-10	330069	-0.937	0.3488
9	76847927	rs7868861	C	T	0.81519	0.010794	0.0017618	8.99498e-10	330069	-2.244	0.02486
12	111862575	rs11065898	T	C	0.22493	-0.010684	0.0017441	9.03858e-10	330069	-1.262	0.2071
9	76857499	rs2604262	A	C	0.82431	0.010559	0.0017238	9.0615e-10	330069	-2.485	0.01295
5	112145261	rs2546106	A	C	0.48697	-0.010722	0.0017505	9.07612e-10	330069	0.838	0.4021
9	76815310	rs4263838	A	T	0.8181	0.01077	0.0017583	9.0803e-10	330069	-2.1	0.03574
2	175073147	rs75027449	T	C	0.1894	0.010541	0.0017212	9.11171e-10	330069	-1.021	0.3073
2	175031866	rs78735631	T	C	0.18916	0.010541	0.0017212	9.12011e-10	330069	-1.11	0.2672
5	112054086	rs6864688	T	C	0.53334	-0.010656	0.0017406	9.2619e-10	330069	1.075	0.2825
2	59962684	rs12473065	G	T	0.50344	0.010655	0.0017408	9.30465e-10	330069	-1.802	0.0715
12	112717920	rs7977534	C	T	0.30263	-0.01107	0.0018088	9.36052e-10	330069	-0.917	0.3594
2	175052787	rs6729988	C	G	0.18935	0.010533	0.0017212	9.37346e-10	330069	-1.049	0.2943
9	76847282	rs10781204	C	T	0.8152	0.010782	0.0017618	9.39074e-10	330069	-2.259	0.02387
12	112699540	rs2285810	C	T	0.30286	-0.011072	0.0018097	9.46673e-10	330069	-0.923	0.356
11	45073858	rs1351848	T	C	0.45292	0.010752	0.0017574	9.47982e-10	330069	-1.704	0.0883
12	112790648	rs7979545	C	T	0.30328	-0.011076	0.0018105	9.49511e-10	330069	-0.943	0.3456
2	175076326	rs78717261	G	T	0.18941	0.010529	0.0017211	9.50386e-10	330069	-1.018	0.3085
2	175057564	rs10930650	T	C	0.18939	0.010528	0.0017212	9.54553e-10	330069	-1.034	0.3013
2	175070177	rs11676867	T	C	0.1894	0.010527	0.0017212	9.58959e-10	330069	-1.023	0.3064
9	76803091	rs7872579	A	T	0.81808	0.010753	0.0017583	9.64273e-10	330069	-2.081	0.03742
9	76800240	rs4338178	A	C	0.81808	0.010753	0.0017583	9.64273e-10	330069	-2.081	0.03745
6	108876002	rs768023	A	G	0.61426	-0.010808	0.0017679	9.77462e-10	330069	7.485	7.15e-14
9	76831564	rs10781199	G	A	0.81558	0.01074	0.0017574	9.89464e-10	330069	-2.117	0.03426
2	175040106	rs77724717	C	T	0.18923	0.010516	0.001721	9.94718e-10	330069	-1.078	0.2809
2	174976833	rs77345174	C	T	0.19071	0.010517	0.0017218	1.00972e-09	330069	-1.332	0.1829
2	175053692	rs74426225	G	A	0.18928	0.010509	0.001721	1.01953e-09	330069	-1.034	0.3012
2	175031356	rs75428645	T	C	0.18896	0.010507	0.0017209	1.02707e-09	330069	-1.135	0.2566
11	45123931	rs73464507	C	G	0.16139	-0.010586	0.0017348	1.04713e-09	330069	1.043	0.2968
9	76842889	rs7870130	A	T	0.81525	0.010747	0.0017619	1.06316e-09	330069	-2.244	0.02481
2	175055629	rs114205838	G	C	0.18924	0.010497	0.001721	1.06684e-09	330069	-0.491	0.6233
17	44064851	rs8079215	T	C	0.72074	-0.01063	0.0017433	1.07795e-09	330069	-2.523	0.01165
5	112151551	rs12656359	T	G	0.53616	-0.010621	0.001742	1.08094e-09	330069	0.942	0.3461
19	4052920	rs72976987	T	C	0.19102	-0.010587	0.0017365	1.08493e-09	330069	3.959	7.511e-05
11	45075492	rs4486613	T	C	0.45086	0.010709	0.0017573	1.10484e-09	330069	-1.731	0.08342
9	76871669	rs6560386	T	C	0.81499	0.010744	0.0017635	1.11173e-09	330069	-2.319	0.02039
2	175030564	rs75132731	A	G	0.18909	0.010485	0.0017212	1.11764e-09	330069	-1.126	0.2601
2	201078088	rs10445790	C	T	0.39267	0.010599	0.0017409	1.14051e-09	330069	-2.006	0.04485
2	175041684	rs76457036	G	T	0.18916	0.010477	0.0017209	1.14288e-09	330069	-1.078	0.2812
12	112648981	rs10161225	C	T	0.30274	-0.011007	0.001808	1.1463e-09	330069	-0.865	0.3868
2	175051210	rs75778851	T	A	0.18932	0.010476	0.0017211	1.15266e-09	330069	-1.046	0.2955
12	112801608	rs7970939	G	A	0.30338	-0.011019	0.0018104	1.15478e-09	330069	-0.959	0.3378
9	76872038	rs1349970	T	C	0.81499	0.01073	0.0017635	1.16896e-09	330069	-2.325	0.0201
2	175053684	rs75606149	G	A	0.18804	0.010471	0.0017211	1.17598e-09	330069	-0.992	0.321
9	76804458	rs4557768	C	T	0.69167	0.010699	0.0017588	1.18059e-09	330069	-2.332	0.01968
9	76867667	rs2376054	A	G	0.81503	0.010724	0.0017633	1.1896e-09	330069	-2.322	0.02021
2	175045949	rs76519710	C	G	0.18916	0.010465	0.0017209	1.19454e-09	330069	-1.077	0.2816
9	76876628	rs2168231	T	C	0.81503	0.010723	0.0017635	1.19922e-09	330069	-2.377	0.01747
12	112655948	rs7295628	C	T	0.30294	-0.010997	0.0018089	1.20559e-09	330069	-0.945	0.3446
2	175035431	rs74346950	A	G	0.18905	0.010462	0.0017212	1.21423e-09	330069	-1.12	0.2627
5	112138888	rs2952615	C	G	0.61831	-0.010585	0.0017421	1.23339e-09	330069	-0.391	0.6962
11	45068571	rs7937459	A	C	0.40463	0.010596	0.0017444	1.24423e-09	330069	-1.993	0.04625
5	112152649	rs2431240	T	C	0.53638	-0.010572	0.0017421	1.29181e-09	330069	0.816	0.4145
11	45123798	rs34937552	A	G	0.31557	-0.010677	0.0017604	1.32008e-09	330069	-0.514	0.6072
2	104118594	rs6760407	T	G	0.44929	-0.010571	0.0017432	1.32923e-09	330069	-1.235	0.2167
5	112041594	rs1441375	C	T	0.64523	-0.010525	0.0017373	1.37721e-09	330069	-0.348	0.7282
12	112667675	rs1005902	G	T	0.30321	-0.010962	0.0018097	1.38516e-09	330069	-0.994	0.3204
2	59975486	rs6545749	G	C	0.50485	0.010547	0.0017415	1.39508e-09	330069	-1.492	0.1357
5	111984534	rs72791200	G	A	0.14088	0.010417	0.0017203	1.40314e-09	330069	1.15	0.2501
17	44074586	rs12051901	A	G	0.27073	0.010547	0.0017418	1.40443e-09	330069	2.537	0.01118
5	112153119	rs2545165	T	C	0.62087	-0.010528	0.0017395	1.42659e-09	330069	-0.379	0.7047
2	59983904	rs10168190	A	C	0.53369	0.010523	0.0017412	1.51043e-09	330069	-2.136	0.03266
9	76852588	rs1455042	C	T	0.81485	0.010655	0.0017633	1.5181e-09	330069	-2.266	0.02344
9	76854552	rs10869361	C	T	0.81557	0.010626	0.0017588	1.52757e-09	330069	-2.274	0.02299
9	76856781	rs6560381	G	A	0.81563	0.010622	0.0017587	1.54561e-09	330069	-2.327	0.01999
5	112153665	rs2545164	T	C	0.62069	-0.010502	0.0017394	1.56351e-09	330069	-0.381	0.703
5	111996948	rs1899309	T	C	0.62125	-0.010494	0.0017381	1.56711e-09	330069	-0.401	0.6884
9	76851331	rs976438	C	A	0.81559	0.010616	0.0017586	1.57652e-09	330069	-2.269	0.02325
2	201225902	rs1975583	C	A	0.38573	0.01052	0.0017434	1.59625e-09	330069	-2.723	0.006477
9	76855846	rs1598289	T	A	0.81566	0.010607	0.0017586	1.62405e-09	330069	-2.302	0.02133
9	76862911	rs2168229	C	T	0.81499	0.010625	0.0017632	1.68345e-09	330069	-2.27	0.02322
9	76858530	rs10781205	C	T	0.81499	0.010624	0.0017632	1.68927e-09	330069	-2.308	0.02101
9	76857355	rs4745307	C	T	0.81499	0.010624	0.0017632	1.69044e-09	330069	-2.298	0.02156
5	112175770	rs41115	A	G	0.61876	-0.010496	0.0017423	1.70177e-09	330069	-0.361	0.7181
7	44961337	rs55738054	A	G	0.068978	-0.01042	0.0017297	1.70294e-09	330069	3.176	0.001492
5	112164561	rs351771	A	G	0.61865	-0.010496	0.0017424	1.70687e-09	330069	-0.295	0.7676
7	44950234	rs28593344	T	G	0.068991	-0.010415	0.0017295	1.72783e-09	330069	3.179	0.001478
9	76849156	rs1455041	A	T	0.81491	0.010618	0.0017633	1.72783e-09	330069	-2.262	0.02371
9	76849139	rs1455040	C	T	0.81489	0.010615	0.0017633	1.74421e-09	330069	-2.258	0.02397
5	112176559	rs866006	G	T	0.61952	-0.010489	0.0017425	1.75065e-09	330069	-0.363	0.7166
9	76851463	rs4744713	T	A	0.81491	0.010613	0.0017633	1.7555e-09	330069	-2.254	0.02421
7	44953407	rs62460544	G	C	0.069014	-0.010409	0.0017297	1.77296e-09	330069	3.121	0.001804
2	174931837	rs2044470	T	C	0.27179	0.010448	0.001737	1.80094e-09	330069	-1.631	0.1028
9	76864699	rs1598285	A	G	0.81479	0.010603	0.0017633	1.8197e-09	330069	-2.293	0.02188
1	183282575	rs10911301	G	A	0.46218	-0.01049	0.0017447	1.82936e-09	330069	5.509	3.619e-08
5	112159470	rs2546107	G	A	0.49453	-0.01053	0.0017514	1.83443e-09	330069	0.739	0.46
9	76832928	rs10869351	C	T	0.81415	0.010603	0.0017637	1.8395e-09	330069	-2.343	0.01912
5	139692515	rs6870103	T	G	0.54301	0.010484	0.001745	1.87715e-09	330069	5.402	6.604e-08
13	58822051	rs4627212	G	A	0.29126	0.01047	0.0017428	1.88322e-09	330069	-2.196	0.02809
2	56472159	rs2869529	C	T	0.37772	-0.010448	0.0017393	1.89322e-09	330069	3.336	0.000851
2	104209003	rs10188273	C	T	0.62963	-0.010552	0.001757	1.90634e-09	330069	-1.15	0.2501
12	49474605	rs12821008	T	C	0.40073	0.010478	0.0017449	1.91734e-09	330069	4.936	7.967e-07
2	104110587	rs17336349	G	A	0.45163	-0.010468	0.0017437	1.93419e-09	330069	-1.324	0.1854
5	112167130	rs544243	G	T	0.5609	-0.010451	0.0017409	1.93553e-09	330069	0.855	0.3924
1	183272486	rs12748895	T	C	0.43515	-0.010456	0.0017419	1.94044e-09	330069	3.014	0.002576
12	112146964	rs608848	T	C	0.30025	-0.010892	0.0018144	1.94044e-09	330069	-1.211	0.2259
2	104099833	rs6756149	T	C	0.45186	-0.010465	0.0017438	1.9602e-09	330069	-1.298	0.1943
1	183283969	rs10911302	A	G	0.46131	-0.010473	0.0017453	1.96426e-09	330069	5.452	4.984e-08
2	175084398	rs73037863	T	C	0.19019	0.010339	0.0017234	1.9893e-09	330069	-1.058	0.29
5	112176325	rs42427	A	G	0.6235	-0.010454	0.0017427	1.9893e-09	330069	-0.293	0.7694
2	104099985	rs6759192	T	C	0.45186	-0.01046	0.0017438	1.99388e-09	330069	-1.304	0.1921
12	112906415	rs11066320	G	A	0.59146	-0.010513	0.0017528	1.99986e-09	330069	-0.246	0.8056
2	104106067	rs62151028	C	T	0.45165	-0.010459	0.0017437	2.00124e-09	330069	-1.323	0.1857
5	139689968	rs7717563	G	A	0.54328	0.010465	0.0017451	2.01512e-09	330069	5.417	6.075e-08
12	112037526	rs10849962	G	A	0.78322	0.010477	0.0017474	2.02582e-09	330069	1.347	0.178
2	104104650	rs1515000	A	C	0.45164	-0.010453	0.0017437	2.03892e-09	330069	-1.324	0.1855
2	201240305	rs12990174	A	G	0.39112	0.010458	0.0017446	2.04174e-09	330069	-2.839	0.004524
5	112177171	rs465899	A	G	0.6189	-0.010442	0.0017422	2.05494e-09	330069	-0.349	0.7274
19	4044424	rs59208569	C	G	0.81829	0.010938	0.0018261	2.10426e-09	330069	-2.82	0.004809
11	46393958	rs7936413	C	T	0.17585	0.010629	0.0017746	2.1096e-09	330069	-3.004	0.002664
2	104212231	rs1597749	C	T	0.62931	-0.010521	0.0017567	2.11154e-09	330069	-1.175	0.2398
2	201230076	rs6743157	T	C	0.39092	0.010442	0.0017446	2.16322e-09	330069	-2.858	0.004259
2	201233040	rs35417285	C	T	0.39011	0.010437	0.0017439	2.1692e-09	330069	-2.752	0.00593
2	201227060	rs1369841	G	A	0.39113	0.010438	0.0017446	2.19129e-09	330069	-2.859	0.004251
12	112985328	rs741334	G	A	0.30969	-0.010835	0.0018116	2.2182e-09	330069	-0.823	0.4106
12	112141233	rs642898	G	A	0.29949	-0.010852	0.001815	2.2475e-09	330069	-1.214	0.2248
7	44973747	rs56113241	T	C	0.070235	-0.01039	0.0017379	2.25009e-09	330069	2.872	0.004079
11	45060671	rs1484399	A	G	0.58996	0.010408	0.0017409	2.2558e-09	330069	-1.035	0.3006
2	175090469	rs11691936	T	G	0.18745	0.010287	0.001721	2.26778e-09	330069	-1.048	0.2947
17	44026739	rs242562	A	G	0.3787	-0.01038	0.0017364	2.2683e-09	330069	4.521	6.141e-06
9	76850827	rs10746949	T	C	0.8147	0.010538	0.0017631	2.27615e-09	330069	-2.161	0.03066
5	111995713	rs3919709	G	A	0.5488	-0.010399	0.0017401	2.28718e-09	330069	0.891	0.3727
2	174931957	rs2044471	A	G	0.27173	0.010379	0.001737	2.30356e-09	330069	-1.565	0.1175
17	43976813	rs11079727	A	C	0.19026	-0.010276	0.0017202	2.31686e-09	330069	6.032	1.617e-09
13	58455528	rs1595217	A	C	0.52806	0.010425	0.0017456	2.34153e-09	330069	-3.74	0.0001842
2	104079968	rs2672851	G	C	0.53963	0.010442	0.0017486	2.35288e-09	330069	1.4	0.1614
2	104079435	rs266074	C	A	0.53963	0.01044	0.0017486	2.36592e-09	330069	1.389	0.1648
13	58457034	rs7329469	G	T	0.52811	0.010422	0.0017456	2.36865e-09	330069	-3.743	0.000182
2	201239002	rs3769456	T	C	0.39101	0.010414	0.0017447	2.39111e-09	330069	-2.828	0.004685
13	58439315	rs1595219	T	C	0.52804	0.010418	0.0017457	2.40215e-09	330069	-3.744	0.0001813
2	104084861	rs266060	A	G	0.53963	0.010434	0.0017486	2.42047e-09	330069	1.406	0.1597
2	201222403	rs2033804	T	A	0.38839	0.010405	0.0017439	2.42382e-09	330069	-2.815	0.004874
11	46582072	rs7127529	C	A	0.17416	0.010474	0.0017554	2.42605e-09	330069	-2.717	0.006579
17	44186478	rs117754181	A	G	0.060144	-0.010104	0.0016936	2.4322e-09	330069	1.598	0.11
2	104084908	rs266059	G	A	0.53963	0.010431	0.0017486	2.43893e-09	330069	1.383	0.1667
5	139670932	rs10051345	C	G	0.4582	-0.010419	0.0017466	2.44231e-09	330069	-5.482	4.202e-08
2	56458509	rs12713315	C	T	0.28134	-0.010344	0.001734	2.44343e-09	330069	5.524	3.313e-08
5	112080728	rs464002	A	G	0.35585	0.010362	0.0017374	2.45867e-09	330069	0.573	0.5669
2	104118607	rs6732785	T	C	0.45954	-0.010425	0.0017479	2.4649e-09	330069	-1.395	0.1629
11	46396479	rs2046768	C	T	0.17374	0.010507	0.0017618	2.46774e-09	330069	-3.015	0.002568
2	201234216	rs3856513	A	G	0.39107	0.010404	0.0017447	2.47685e-09	330069	-2.806	0.005023
2	59955924	rs10180806	T	A	0.54499	0.010378	0.0017408	2.49517e-09	330069	-0.816	0.4143
12	112539516	rs10774649	G	A	0.30233	-0.010791	0.0018099	2.49574e-09	330069	-1.184	0.2366
11	46377770	rs12577142	C	T	0.17471	0.010489	0.0017594	2.5015e-09	330069	-3.172	0.001513
12	112510404	rs7298532	C	T	0.3023	-0.010789	0.0018099	2.51189e-09	330069	-1.209	0.2265
11	46391602	rs12575519	G	T	0.17558	0.010595	0.0017774	2.51304e-09	330069	-3	0.002697
5	139691664	rs2337138	A	C	0.54202	0.010401	0.0017449	2.51362e-09	330069	5.411	6.252e-08
17	44342378	rs4988900	A	G	0.43402	0.010394	0.0017437	2.51652e-09	330069	3.032	0.002429
13	58444238	rs3959824	A	G	0.52807	0.010405	0.0017457	2.5171e-09	330069	-3.696	0.0002186
13	58439492	rs2082975	G	A	0.52803	0.010405	0.0017457	2.52e-09	330069	-3.715	0.0002036
13	58443424	rs2164563	T	A	0.52805	0.010404	0.0017456	2.52116e-09	330069	-3.733	0.0001889
13	58442285	rs1577173	A	T	0.52805	0.010404	0.0017456	2.52232e-09	330069	-3.734	0.0001884
13	58439094	rs1595221	G	A	0.52807	0.010404	0.0017457	2.52464e-09	330069	-3.716	0.0002027
13	58442755	rs1121902	G	A	0.52805	0.010403	0.0017456	2.53454e-09	330069	-3.723	0.0001968
5	112155793	rs501250	C	G	0.61997	-0.010383	0.0017424	2.54273e-09	330069	-0.291	0.771
11	46397323	rs3740974	C	A	0.17381	0.010498	0.0017618	2.54449e-09	330069	-2.961	0.00307
13	58444023	rs4328334	A	T	0.52807	0.010401	0.0017457	2.5527e-09	330069	-3.737	0.0001863
2	201242293	rs3754797	A	G	0.39109	0.010394	0.0017446	2.55682e-09	330069	-2.883	0.003945
13	58443789	rs6561947	G	A	0.52806	0.010401	0.0017457	2.55741e-09	330069	-3.738	0.0001856
2	104089765	rs266051	G	T	0.53989	0.010416	0.0017483	2.55859e-09	330069	1.375	0.169
2	104089774	rs266052	C	A	0.53989	0.010416	0.0017483	2.55859e-09	330069	1.373	0.1696
13	58449644	rs3910460	G	C	0.52805	0.010397	0.0017456	2.58821e-09	330069	-3.725	0.0001954
13	58418411	rs1436680	C	T	0.52836	0.010396	0.0017454	2.58941e-09	330069	-3.722	0.0001978
5	111994592	rs1441370	G	A	0.54917	-0.010364	0.0017402	2.59418e-09	330069	0.936	0.3494
13	58446530	rs995944	G	A	0.52854	0.010392	0.0017451	2.59896e-09	330069	-3.746	0.0001798
13	58419531	rs7328232	C	T	0.52863	0.010393	0.0017451	2.60016e-09	330069	-3.731	0.0001904
13	58410236	rs3861167	C	G	0.52864	0.010392	0.0017451	2.60495e-09	330069	-3.729	0.0001925
11	46370767	rs876701	G	A	0.17107	0.010412	0.0017484	2.60495e-09	330069	-3.009	0.002624
13	58429509	rs2164564	G	A	0.5286	0.010392	0.0017451	2.60795e-09	330069	-3.736	0.0001868
13	58422205	rs978260	G	A	0.52835	0.010393	0.0017454	2.61638e-09	330069	-3.73	0.0001912
11	46584227	rs61882750	G	T	0.17414	0.010452	0.0017554	2.61939e-09	330069	-2.732	0.006301
13	58417256	rs7995271	T	C	0.52836	0.010392	0.0017454	2.62301e-09	330069	-3.73	0.0001916
13	58450430	rs9537841	G	T	0.52855	0.010389	0.001745	2.63027e-09	330069	-3.749	0.0001773
13	58446183	rs1436669	C	T	0.5283	0.010389	0.0017454	2.64789e-09	330069	-3.716	0.0002026
2	104115429	rs6543213	G	A	0.45129	-0.010377	0.0017435	2.65766e-09	330069	-1.357	0.1749
2	104087611	rs266057	T	G	0.53981	0.010405	0.0017483	2.65889e-09	330069	1.402	0.1609
2	104076655	rs266070	G	A	0.54391	0.010383	0.0017445	2.65889e-09	330069	1.396	0.1628
13	58424673	rs1591280	A	G	0.52862	0.010386	0.0017451	2.66011e-09	330069	-3.739	0.000185
13	58414145	rs987331	A	G	0.52857	0.010385	0.0017451	2.6687e-09	330069	-3.716	0.0002027
13	58452224	rs1436671	T	C	0.52807	0.010388	0.0017456	2.67116e-09	330069	-3.711	0.0002064
11	46399538	rs2279465	C	T	0.1737	0.010484	0.0017619	2.67362e-09	330069	-2.963	0.003044
12	112123284	rs601663	G	A	0.2999	-0.010799	0.0018147	2.67485e-09	330069	-1.239	0.2155
2	104136682	rs4851028	A	T	0.45167	-0.010375	0.0017435	2.6767e-09	330069	-1.33	0.1834
2	104069784	rs266067	A	C	0.35933	0.010444	0.0017554	2.69277e-09	330069	1.018	0.3089
2	175088331	rs76431247	T	G	0.18737	0.010238	0.0017209	2.69339e-09	330069	-1.019	0.3082
13	58447198	rs9537838	G	T	0.52855	0.010382	0.001745	2.69588e-09	330069	-3.74	0.0001843
12	49479370	rs12298884	A	G	0.40811	0.010371	0.0017437	2.72898e-09	330069	4.905	9.327e-07
13	58409741	rs3861166	G	A	0.52812	0.010378	0.0017451	2.73716e-09	330069	-3.748	0.0001784
19	4070990	rs11085058	A	G	0.17437	-0.010329	0.0017369	2.73968e-09	330069	3.15	0.001635
2	104088751	rs266047	A	G	0.53994	0.010395	0.001748	2.73968e-09	330069	1.414	0.1572
2	104141332	rs7557217	G	C	0.45168	-0.010368	0.0017435	2.74536e-09	330069	-1.326	0.185
5	139678213	rs1529693	G	A	0.45857	-0.010385	0.0017465	2.74916e-09	330069	-5.511	3.566e-08
1	183287679	rs10911306	T	C	0.46339	-0.010376	0.0017451	2.7555e-09	330069	5.311	1.091e-07
5	112204207	rs2545751	T	C	0.79302	-0.010281	0.0017293	2.76312e-09	330069	-0.325	0.7454
19	4070163	rs59394312	G	C	0.17783	-0.010469	0.001761	2.76885e-09	330069	3.134	0.001724
2	104150791	rs6720941	T	C	0.45169	-0.010363	0.0017435	2.78869e-09	330069	-1.324	0.1854
2	104157299	rs6727302	A	C	0.45197	-0.01038	0.001747	2.82488e-09	330069	-1.474	0.1405
17	44062603	rs6503453	G	A	0.39263	-0.010352	0.0017424	2.83074e-09	330069	3.53	0.000415
12	112502438	rs7314282	G	A	0.30203	-0.010751	0.00181	2.86286e-09	330069	-1.242	0.2144
12	112156745	rs11503168	C	A	0.29957	-0.010773	0.0018141	2.88138e-09	330069	-1.241	0.2147
5	139665181	rs7715538	C	T	0.45938	-0.01037	0.0017464	2.88403e-09	330069	-5.463	4.686e-08
13	58418870	rs4884290	T	G	0.52745	0.010365	0.0017458	2.9067e-09	330069	-3.655	0.0002576
19	4069119	rs7254272	A	G	0.18225	-0.010663	0.0017962	2.91139e-09	330069	3.191	0.001417
13	58419261	rs4884291	C	G	0.52745	0.010364	0.0017458	2.91743e-09	330069	-3.741	0.0001835
13	58408486	rs9537824	T	C	0.52707	0.010366	0.0017465	2.92954e-09	330069	-3.729	0.0001919
13	58417298	rs7995132	C	A	0.52745	0.010362	0.0017458	2.93224e-09	330069	-3.732	0.0001898
5	112130086	rs1734243	A	C	0.65908	-0.010349	0.0017436	2.93427e-09	330069	-0.816	0.4146
11	46422686	rs12574668	A	C	0.17426	0.010421	0.0017559	2.94713e-09	330069	-2.843	0.004471
17	44262496	rs8064802	C	T	0.32506	0.010358	0.0017453	2.95257e-09	330069	1.846	0.06486
11	46561301	rs11038914	T	C	0.17695	0.010544	0.0017769	2.95801e-09	330069	-2.71	0.006728
12	112440731	rs4767284	A	G	0.30197	-0.010741	0.00181	2.96006e-09	330069	-1.197	0.2312
5	112089480	rs2439591	C	T	0.6382	-0.01031	0.0017374	2.96006e-09	330069	-0.811	0.4175
5	139666287	rs13188413	A	T	0.45991	-0.010362	0.0017462	2.96483e-09	330069	-5.477	4.329e-08
12	112871372	rs11066301	G	A	0.40964	0.010401	0.0017529	2.96825e-09	330069	0.287	0.7737
13	58428838	rs7982307	A	G	0.52744	0.010358	0.0017458	2.9792e-09	330069	-3.743	0.0001819
5	139684087	rs4912709	C	T	0.53903	0.010358	0.0017459	2.98195e-09	330069	5.485	4.145e-08
5	139683029	rs4913079	G	A	0.46104	-0.010355	0.0017459	3.00608e-09	330069	-5.459	4.781e-08
11	46536442	rs11038906	A	G	0.1742	0.010409	0.001755	3.01301e-09	330069	-2.75	0.005966
12	112515077	rs6489825	G	A	0.30216	-0.010736	0.0018101	3.01301e-09	330069	-1.277	0.2015
13	58404322	rs8002302	G	A	0.52748	0.010354	0.0017458	3.02273e-09	330069	-3.711	0.0002062
5	139679046	rs7725147	G	A	0.45953	-0.010355	0.0017464	3.03879e-09	330069	-5.433	5.557e-08
5	112019879	rs10463642	A	C	0.37929	0.010314	0.0017394	3.03948e-09	330069	0.361	0.7181
11	46551918	rs10160701	T	C	0.17752	0.010547	0.0017787	3.04649e-09	330069	-2.795	0.005192
2	104092956	rs2569970	T	C	0.53952	0.010356	0.0017472	3.08745e-09	330069	1.454	0.1459
11	46373311	rs7951870	C	T	0.18216	0.010861	0.0018327	3.10599e-09	330069	-2.934	0.00335
11	46515902	rs3802888	G	A	0.17792	0.010542	0.001779	3.10742e-09	330069	-2.771	0.005588
5	112019878	rs10463641	T	C	0.3793	0.010306	0.0017394	3.12392e-09	330069	0.343	0.7314
7	44940427	rs62460539	A	G	0.068316	-0.010234	0.0017273	3.13256e-09	330069	2.974	0.00294
5	112162413	rs2546110	G	A	0.58409	-0.010427	0.00176	3.13906e-09	330069	-0.709	0.4784
2	104094981	rs266056	G	C	0.54083	0.010347	0.001747	3.17322e-09	330069	1.392	0.1638
5	139683762	rs6873248	G	A	0.53877	0.010342	0.0017462	3.17541e-09	330069	5.545	2.945e-08
5	139671062	rs13170475	T	C	0.45982	-0.010341	0.0017462	3.17907e-09	330069	-5.472	4.458e-08
11	46524013	rs2902858	C	T	0.17416	0.010394	0.0017552	3.18127e-09	330069	-2.756	0.00585
11	46560680	rs11819869	T	C	0.1773	0.010531	0.0017787	3.21144e-09	330069	-2.756	0.005845
17	44182267	rs11652924	C	T	0.54322	-0.010334	0.0017458	3.23221e-09	330069	-2.041	0.04127
11	46460038	rs2864076	T	C	0.17403	0.010383	0.0017542	3.24041e-09	330069	-2.74	0.006138
5	112233750	rs153552	C	T	0.45544	0.010338	0.0017466	3.24041e-09	330069	-1.018	0.3086
5	112164238	rs187075	T	C	0.63309	-0.010314	0.0017428	3.25987e-09	330069	-0.581	0.5614
11	46368241	rs61882678	T	A	0.17136	0.010363	0.0017511	3.26212e-09	330069	-2.986	0.002825
17	44202690	rs8068300	C	T	0.54314	-0.010331	0.0017457	3.26738e-09	330069	-2.034	0.04197
12	112430346	rs7300252	T	C	0.30214	-0.01071	0.0018101	3.28171e-09	330069	-1.187	0.2351
12	112312368	rs7309970	C	T	0.30161	-0.010712	0.0018105	3.28625e-09	330069	-1.181	0.2378
12	112795744	rs7978523	C	T	0.30228	-0.010711	0.0018104	3.29534e-09	330069	-0.873	0.3824
12	112194976	rs737280	C	T	0.29969	-0.010729	0.0018135	3.29762e-09	330069	-1.342	0.1797
17	44356058	rs62071628	A	G	0.43498	0.010315	0.0017439	3.33043e-09	330069	2.63	0.008527
5	112154303	rs464708	G	T	0.63527	-0.010287	0.0017393	3.34195e-09	330069	-0.64	0.5219
5	112172219	rs411356	A	G	0.63331	-0.010304	0.0017427	3.36899e-09	330069	-0.574	0.5657
5	112172930	rs1966476	C	T	0.58488	-0.010391	0.0017578	3.39391e-09	330069	-0.711	0.4773
2	175097356	rs11686695	A	C	0.18778	0.010172	0.0017207	3.39547e-09	330069	-1.06	0.289
11	46673344	rs7109698	T	C	0.17436	0.010375	0.0017553	3.41586e-09	330069	-2.754	0.005884
11	46466828	rs2171668	C	A	0.1742	0.010373	0.0017551	3.42216e-09	330069	-2.751	0.005936
11	46467092	rs2171667	G	C	0.17421	0.010373	0.0017551	3.42452e-09	330069	-3.312	0.000928
12	112463366	rs4767296	C	T	0.30209	-0.010703	0.0018111	3.43875e-09	330069	-1.235	0.2168
11	45062196	rs900859	G	T	0.59018	0.010285	0.0017408	3.45462e-09	330069	-1.031	0.3025
5	139666427	rs13161399	T	G	0.46038	-0.010316	0.0017462	3.46817e-09	330069	-5.433	5.55e-08
12	112941571	rs7953150	A	G	0.30551	-0.010684	0.0018084	3.46897e-09	330069	-0.803	0.4221
2	104138639	rs58378462	A	G	0.4627	-0.010326	0.0017479	3.46976e-09	330069	-1.39	0.1646
5	112101793	rs2464805	A	C	0.63753	-0.010263	0.0017374	3.4898e-09	330069	-0.634	0.5263
12	112100773	rs10849966	A	T	0.30044	-0.010721	0.0018154	3.52371e-09	330069	-1.206	0.2279
5	112172786	rs1966477	T	G	0.63327	-0.010289	0.0017428	3.54895e-09	330069	-0.6	0.5488
7	44940256	rs62460538	C	T	0.071869	-0.010421	0.0017654	3.57767e-09	330069	3.032	0.002432
17	43970317	rs8065165	T	C	0.18257	-0.010144	0.0017186	3.58179e-09	330069	6.265	3.734e-10
17	44291980	17:44291980_G_A	A	G	0.54311	-0.010294	0.0017441	3.59087e-09	330069	-1.692	0.09071
11	46650438	rs60722866	C	T	0.17427	0.01036	0.0017554	3.60081e-09	330069	-2.763	0.00572
11	46567475	rs61882746	T	C	0.17432	0.010357	0.0017551	3.61327e-09	330069	-2.714	0.006648
7	44942167	rs62460540	A	G	0.066356	-0.010204	0.0017292	3.6191e-09	330069	2.702	0.006886
5	139661279	rs6893253	C	T	0.46041	-0.010304	0.0017463	3.61993e-09	330069	-5.463	4.692e-08
17	44186952	rs9904766	C	T	0.54428	-0.010295	0.0017447	3.62076e-09	330069	-2.099	0.03585
5	139669386	rs1347143	A	G	0.4531	-0.010307	0.0017469	3.63245e-09	330069	-5.326	1.004e-07
17	44019712	rs242557	A	G	0.38128	-0.010261	0.0017396	3.67029e-09	330069	4.493	7.009e-06
11	46446264	rs6485682	A	C	0.82245	-0.01049	0.0017784	3.67198e-09	330069	2.798	0.005149
12	112943197	rs2051801	G	A	0.3053	-0.010662	0.0018077	3.67198e-09	330069	-0.846	0.3973
17	44058640	rs3785885	G	A	0.72274	-0.01031	0.0017479	3.67705e-09	330069	-2.449	0.01433
11	46454313	rs16938506	C	A	0.1776	0.01049	0.0017786	3.68129e-09	330069	-2.801	0.0051
2	76459530	rs35066740	T	G	0.19648	0.010193	0.0017281	3.68129e-09	330069	-0.207	0.8361
11	46639582	rs61884264	A	G	0.17427	0.010352	0.0017553	3.69999e-09	330069	-2.74	0.006142
11	46646030	rs7122039	C	A	0.17427	0.010352	0.0017554	3.70169e-09	330069	-2.761	0.005759
12	49479968	rs7296288	C	A	0.47117	0.010279	0.001743	3.70254e-09	330069	5.685	1.308e-08
5	139660916	rs3777095	A	G	0.46041	-0.010296	0.0017463	3.72477e-09	330069	-5.465	4.621e-08
11	46499874	rs7130141	T	C	0.1776	0.010486	0.0017786	3.72735e-09	330069	-2.789	0.005289
2	104132805	rs1349574	T	C	0.45241	-0.010279	0.0017435	3.73766e-09	330069	-1.414	0.1574
12	112175819	rs648300	G	C	0.29965	-0.010694	0.001814	3.74542e-09	330069	-1.275	0.2024
11	46402852	rs35324223	G	A	0.18218	0.010796	0.0018315	3.75924e-09	330069	-2.88	0.003979
17	44189598	rs2016034	G	A	0.54388	-0.01029	0.0017456	3.75924e-09	330069	-1.985	0.04718
5	112162854	rs2229992	C	T	0.58496	-0.01036	0.0017578	3.77746e-09	330069	-0.654	0.513
5	112204170	rs2545170	A	G	0.54373	-0.010329	0.0017524	3.77833e-09	330069	1.106	0.2687
11	46515004	rs12578042	G	C	0.17765	0.010482	0.0017788	3.7949e-09	330069	-2.785	0.005347
2	76455168	rs13027106	C	T	0.19765	0.010189	0.001729	3.80014e-09	330069	-0.194	0.8465
5	112067142	rs468179	T	C	0.35561	0.010235	0.0017371	3.81944e-09	330069	0.72	0.4713
11	46500654	rs58147945	G	C	0.1744	0.010351	0.0017569	3.82913e-09	330069	-2.714	0.006654
11	46470827	rs11038897	T	C	0.17742	0.010465	0.0017767	3.861e-09	330069	-2.772	0.005564
17	43953502	rs2316775	G	A	0.18264	-0.010129	0.0017197	3.86634e-09	330069	6.162	7.164e-10
1	183298610	rs4651153	C	T	0.47936	-0.010292	0.0017477	3.88776e-09	330069	5.212	1.87e-07
11	46509344	rs1489192	C	T	0.17442	0.010346	0.0017571	3.91021e-09	330069	-2.744	0.006064
11	46472414	rs61882709	A	G	0.17442	0.010344	0.0017568	3.91471e-09	330069	-2.732	0.006286
11	46635695	rs7924401	T	A	0.17423	0.010335	0.0017553	3.91652e-09	330069	-2.755	0.005869
17	44274474	rs2532231	T	C	0.54254	-0.010272	0.0017452	3.96369e-09	330069	-1.837	0.06614
1	183300515	rs2020986	A	G	0.47922	-0.010284	0.0017476	3.99117e-09	330069	5.196	2.035e-07
17	44262950	17:44262950_G_A	A	G	0.54249	-0.01027	0.0017453	3.99393e-09	330069	-1.938	0.0526
2	104057364	rs1368546	C	T	0.56456	0.010256	0.0017429	4.00221e-09	330069	0.446	0.6552
11	46611805	rs61882758	G	A	0.17425	0.010327	0.0017551	4.00682e-09	330069	-2.739	0.006163
11	45060105	rs61881900	C	T	0.40844	-0.010236	0.0017398	4.02624e-09	330069	1.043	0.2971
19	4072146	rs7259699	A	G	0.17366	-0.010205	0.0017349	4.0439e-09	330069	3.11	0.001871
11	46631181	rs35623865	T	C	0.17384	0.010326	0.0017554	4.04576e-09	330069	-2.734	0.00625
12	112198021	rs7133964	G	C	0.29938	-0.010667	0.0018136	4.06631e-09	330069	-1.357	0.1749
17	44131305	rs4792827	C	T	0.5469	-0.010269	0.001746	4.07193e-09	330069	-2.162	0.0306
12	112197837	rs7294578	C	A	0.2994	-0.010666	0.0018136	4.0785e-09	330069	-1.395	0.163
11	46495302	rs11038900	G	A	0.17766	0.010459	0.0017785	4.09355e-09	330069	-2.752	0.00592
12	112286938	rs10849979	C	T	0.30208	-0.010645	0.0018103	4.1011e-09	330069	-1.228	0.2195
12	112283914	rs7137386	G	T	0.30208	-0.010644	0.0018103	4.11339e-09	330069	-1.287	0.1982
5	112182232	rs433429	T	A	0.63507	-0.01023	0.0017401	4.13428e-09	330069	-0.66	0.509
2	104148570	rs55713926	G	C	0.46308	-0.01029	0.0017504	4.14381e-09	330069	-1.388	0.1652
13	58355851	rs7988405	C	A	0.46255	-0.010251	0.001744	4.1639e-09	330069	3.541	0.000399
5	112045587	rs1661036	G	A	0.63455	-0.010245	0.001743	4.16677e-09	330069	-0.607	0.5439
17	44224272	17:44224272_G_A	A	G	0.54314	-0.010257	0.0017455	4.19566e-09	330069	-2.226	0.026
12	112285542	rs4346023	C	T	0.30206	-0.010638	0.0018103	4.20049e-09	330069	-1.262	0.2069
1	183290145	rs1411393	A	G	0.47891	-0.010268	0.0017476	4.21988e-09	330069	5.188	2.121e-07
11	46469900	rs7951579	A	G	0.18349	0.010749	0.0018297	4.24424e-09	330069	-2.733	0.006275
11	45060304	rs4755929	G	T	0.40841	-0.01022	0.0017399	4.25696e-09	330069	1.026	0.3048
11	45061455	rs4755931	T	G	0.40819	-0.010219	0.0017397	4.26089e-09	330069	1.092	0.275
11	45061235	rs61881901	G	A	0.4085	-0.010219	0.0017398	4.26481e-09	330069	1.04	0.2983
1	183297476	rs12750586	A	G	0.47931	-0.010264	0.0017476	4.27366e-09	330069	5.226	1.734e-07
13	58426427	rs717256	G	A	0.52809	0.01025	0.0017452	4.27858e-09	330069	-3.823	0.0001319
11	45061285	rs61881902	T	C	0.4085	-0.010218	0.0017398	4.28055e-09	330069	1.047	0.2952
17	44191483	rs11653367	G	A	0.32488	0.01025	0.0017453	4.28549e-09	330069	2.133	0.03296
11	45071979	rs10769108	G	A	0.45566	0.010309	0.0017556	4.30626e-09	330069	-1.678	0.09334
1	183316328	rs10911317	A	G	0.46557	-0.010244	0.0017448	4.32514e-09	330069	5.238	1.623e-07
1	183299611	rs953273	G	A	0.47926	-0.01026	0.0017476	4.3381e-09	330069	5.197	2.025e-07
6	108906200	rs12206094	T	C	0.27907	0.010228	0.0017421	4.3391e-09	330069	-5.835	5.368e-09
5	112182379	rs386830	A	G	0.63513	-0.010215	0.0017401	4.3441e-09	330069	-0.657	0.511
1	183299881	rs953274	C	T	0.47926	-0.010259	0.0017476	4.35111e-09	330069	5.195	2.05e-07
1	183297826	rs12122568	C	A	0.47926	-0.010259	0.0017476	4.35311e-09	330069	5.228	1.716e-07
1	183299502	rs1330224	A	G	0.47928	-0.010259	0.0017476	4.35311e-09	330069	5.202	1.976e-07
1	183298008	rs12130199	T	C	0.47926	-0.010258	0.0017476	4.36415e-09	330069	5.226	1.735e-07
1	183297613	rs12122499	C	A	0.47927	-0.010258	0.0017476	4.36717e-09	330069	5.224	1.754e-07
1	183298049	rs12145095	A	G	0.47926	-0.010257	0.0017476	4.38531e-09	330069	5.225	1.742e-07
1	183297930	rs12130162	T	C	0.47926	-0.010257	0.0017476	4.38733e-09	330069	5.191	2.086e-07
1	183297422	rs12033696	T	C	0.47926	-0.010257	0.0017476	4.38834e-09	330069	5.239	1.619e-07
1	183299013	rs10911312	G	A	0.47927	-0.010255	0.0017476	4.41266e-09	330069	5.246	1.556e-07
1	183298342	rs10911311	T	C	0.47927	-0.010255	0.0017476	4.41876e-09	330069	5.209	1.899e-07
1	183298219	rs10911310	C	G	0.47927	-0.010255	0.0017476	4.41876e-09	330069	5.209	1.903e-07
1	183300112	rs952448	C	T	0.47927	-0.010254	0.0017476	4.42588e-09	330069	5.197	2.022e-07
1	183298495	rs10797874	C	T	0.47927	-0.010254	0.0017476	4.42894e-09	330069	5.207	1.917e-07
1	183298463	rs10797873	C	G	0.47927	-0.010254	0.0017476	4.42894e-09	330069	5.204	1.946e-07
1	183298502	rs10797875	C	T	0.47927	-0.010254	0.0017476	4.42894e-09	330069	5.199	2.002e-07
2	76455812	rs13001881	G	A	0.19738	0.010138	0.0017284	4.48126e-09	330069	-0.201	0.8408
6	109020032	rs479744	T	G	0.21877	0.010506	0.0017912	4.48952e-09	330069	-4.391	1.13e-05
5	112138734	rs529076	A	G	0.63824	-0.010191	0.0017376	4.49366e-09	330069	-0.553	0.58
11	46648432	rs7108770	A	G	0.18359	0.010734	0.0018302	4.49883e-09	330069	-2.801	0.005094
6	109019721	rs532093	A	G	0.21941	0.010525	0.0017949	4.51752e-09	330069	-4.438	9.067e-06
2	201168993	rs4673912	T	G	0.38669	0.010264	0.0017505	4.52689e-09	330069	-2.227	0.02592
2	104354232	rs12712181	G	A	0.59276	0.010198	0.0017395	4.56247e-09	330069	1.314	0.1889
5	112095332	rs2546116	A	G	0.3499	0.01018	0.0017366	4.57193e-09	330069	0.466	0.6409
1	183296270	rs4630090	T	C	0.47928	-0.010244	0.0017476	4.58775e-09	330069	5.248	1.537e-07
2	175082308	rs4131583	G	T	0.32906	0.010374	0.0017702	4.61955e-09	330069	-2.163	0.03054
1	183295930	rs4549998	G	A	0.47929	-0.010242	0.0017476	4.62168e-09	330069	5.24	1.61e-07
1	183286581	rs10911304	T	G	0.4775	-0.010226	0.0017451	4.6302e-09	330069	5.214	1.853e-07
5	112149757	rs2545169	C	T	0.64118	-0.010177	0.0017369	4.65908e-09	330069	-0.514	0.6075
5	112153495	rs392907	G	A	0.6383	-0.010182	0.0017379	4.67197e-09	330069	-0.505	0.6138
2	104142610	rs1022297	G	C	0.46188	-0.01024	0.0017481	4.69245e-09	330069	-1.46	0.1442
5	112244037	rs468751	T	C	0.45192	0.010235	0.0017473	4.69894e-09	330069	-1.009	0.3131
5	112032675	rs10463643	T	C	0.34356	0.010169	0.0017367	4.7665e-09	330069	0.096	0.9234
5	112181576	rs397768	A	G	0.63489	-0.010187	0.0017401	4.79292e-09	330069	-0.674	0.5002
6	108885623	rs1536057	T	C	0.27979	0.010202	0.0017428	4.8095e-09	330069	-5.866	4.463e-09
2	104149476	rs1597744	G	A	0.46192	-0.010233	0.0017481	4.81726e-09	330069	-1.435	0.1512
1	183294430	rs4651152	G	C	0.47926	-0.010229	0.0017476	4.81837e-09	330069	5.238	1.621e-07
5	112144954	rs395266	C	T	0.63829	-0.01017	0.0017384	4.90908e-09	330069	-0.486	0.6269
5	112226192	rs818426	A	G	0.45387	0.010247	0.0017515	4.91926e-09	330069	-1.106	0.2689
1	183299153	rs10911313	A	G	0.47951	-0.010224	0.0017477	4.92606e-09	330069	5.212	1.866e-07
2	162901327	rs16822665	T	C	0.30494	-0.01021	0.0017455	4.93742e-09	330069	7.046	1.839e-12
5	112051828	rs1661035	C	G	0.63852	-0.010159	0.001737	4.95564e-09	330069	-0.597	0.5505
2	175079733	rs10186796	A	G	0.32852	0.010345	0.0017689	4.97508e-09	330069	-2.282	0.02251
17	44222424	17:44222424_G_C	C	G	0.54323	-0.010206	0.0017455	5.00495e-09	330069	-2.097	0.03599
1	183293707	rs10911309	G	A	0.47934	-0.010218	0.0017477	5.0188e-09	330069	5.243	1.582e-07
5	139539090	rs270162	T	C	0.46442	-0.010226	0.0017491	5.02227e-09	330069	-5.265	1.401e-07
2	104149288	rs13392420	A	C	0.46196	-0.010218	0.0017481	5.07458e-09	330069	-1.437	0.1506
2	104143886	rs1451983	T	C	0.46198	-0.010217	0.0017481	5.08628e-09	330069	-1.44	0.1499
2	104144902	rs17414806	T	C	0.46197	-0.010216	0.0017481	5.09565e-09	330069	-1.429	0.1529
2	104142548	rs1022298	G	T	0.46198	-0.010216	0.0017481	5.10035e-09	330069	-1.436	0.1509
2	104138823	rs7572064	A	G	0.46198	-0.010216	0.0017481	5.10035e-09	330069	-1.425	0.1542
2	104141414	rs2068482	G	C	0.46198	-0.010216	0.0017481	5.10387e-09	330069	-1.42	0.1556
2	104141247	rs7557106	T	C	0.46198	-0.010214	0.001748	5.13452e-09	330069	-1.437	0.1507
11	46548754	rs61882743	G	C	0.18349	0.010693	0.0018302	5.14044e-09	330069	-2.716	0.006616
2	104138496	rs6707968	G	A	0.46197	-0.010213	0.0017481	5.15347e-09	330069	-1.433	0.1518
11	46599248	rs11038927	C	G	0.18352	0.010686	0.0018292	5.17011e-09	330069	-2.775	0.005519
2	104136581	rs4851653	A	G	0.46194	-0.010212	0.0017481	5.17011e-09	330069	-1.438	0.1505
2	104138351	rs6707686	G	A	0.46198	-0.010211	0.0017481	5.18442e-09	330069	-1.435	0.1514
5	112217964	rs67293732	C	G	0.45614	0.010236	0.0017524	5.19278e-09	330069	-1.094	0.2738
17	44059010	rs17651507	T	A	0.27201	0.010177	0.0017426	5.21915e-09	330069	2.704	0.006851
2	104121555	rs7593587	A	C	0.46193	-0.010208	0.0017479	5.22878e-09	330069	-1.466	0.1425
2	104153276	rs10199507	T	A	0.46197	-0.010207	0.0017481	5.26502e-09	330069	-1.457	0.1451
2	104116083	rs7371212	A	G	0.46138	-0.010199	0.001747	5.27959e-09	330069	-1.506	0.1321
2	104126383	rs4613308	C	T	0.46194	-0.010203	0.0017479	5.30762e-09	330069	-1.447	0.1479
5	112153996	rs563556	G	C	0.63782	-0.010148	0.0017384	5.31374e-09	330069	-0.493	0.622
2	104128108	rs1451980	A	T	0.46194	-0.010203	0.0017479	5.31618e-09	330069	-1.495	0.1348
2	104129146	rs1376839	A	T	0.46194	-0.010203	0.0017479	5.31618e-09	330069	-1.44	0.1499
2	104130003	rs10174287	T	A	0.46193	-0.010202	0.0017479	5.32476e-09	330069	-1.439	0.1502
2	104129424	rs1451978	T	C	0.46194	-0.010202	0.0017479	5.32599e-09	330069	-1.501	0.1335
2	104129357	rs1451979	A	G	0.46194	-0.010202	0.0017479	5.32599e-09	330069	-1.423	0.1546
2	104153996	rs1584706	G	A	0.462	-0.010203	0.0017481	5.32967e-09	330069	-1.461	0.1439
11	45062295	rs7395097	G	A	0.40839	-0.010154	0.0017397	5.33826e-09	330069	1.048	0.2946
11	45062251	rs7395124	A	G	0.4084	-0.010153	0.0017397	5.35427e-09	330069	1.037	0.2997
2	104126904	rs1901478	C	T	0.46193	-0.0102	0.0017479	5.3592e-09	330069	-1.447	0.148
12	112047296	rs7484754	A	T	0.18429	-0.010508	0.0018007	5.36414e-09	330069	-3.189	0.001427
2	104136397	rs10210222	C	T	0.46199	-0.010201	0.0017481	5.36537e-09	330069	-1.44	0.1499
2	104126586	rs4533489	A	G	0.46194	-0.0102	0.0017479	5.3765e-09	330069	-1.447	0.1478
2	104132182	rs10168971	A	C	0.462	-0.0102	0.0017481	5.38518e-09	330069	-1.453	0.1463
2	56472393	rs2080606	C	G	0.25791	-0.010115	0.001734	5.4325e-09	330069	4.767	1.872e-06
5	112219140	rs818797	A	G	0.45619	0.010222	0.0017524	5.45255e-09	330069	-1.121	0.2623
12	112044333	rs3809274	C	G	0.18424	-0.010504	0.0018009	5.46512e-09	330069	-3.152	0.001623
5	139539235	rs199152	G	A	0.4663	-0.010202	0.0017492	5.48025e-09	330069	-5.283	1.27e-07
12	112046476	rs2339818	C	T	0.18423	-0.0105	0.0018008	5.51061e-09	330069	-3.191	0.001416
5	112228765	rs459102	A	C	0.35757	0.010286	0.0017644	5.55009e-09	330069	0.458	0.6468
11	45062947	rs1484400	C	G	0.43073	0.010175	0.0017453	5.55904e-09	330069	-2.122	0.03384
12	112054977	rs10849963	T	G	0.1842	-0.010497	0.0018009	5.59629e-09	330069	-3.221	0.001276
2	76383589	rs13027159	A	G	0.74452	-0.010097	0.0017325	5.62341e-09	330069	0.431	0.6662
2	76394682	rs34743837	A	C	0.20469	0.010147	0.0017413	5.64937e-09	330069	0.009	0.9925
2	104063865	rs266063	C	T	0.56167	0.010174	0.0017462	5.65718e-09	330069	0.625	0.5319
5	112113527	rs467033	T	A	0.50333	-0.010208	0.001752	5.65979e-09	330069	0.875	0.3817
5	112155504	rs2545163	G	C	0.63772	-0.010129	0.0017385	5.66239e-09	330069	-0.508	0.6111
5	112124369	rs2431238	C	T	0.66496	-0.010122	0.0017373	5.66631e-09	330069	-1.1	0.2713
2	104059283	rs1433309	A	G	0.56467	0.010155	0.001743	5.67414e-09	330069	0.731	0.4649
13	58356148	rs7988978	G	A	0.46982	-0.010142	0.0017408	5.67545e-09	330069	3.547	0.0003895
2	162908664	rs12995636	A	G	0.68805	0.010156	0.0017443	5.80631e-09	330069	-6.694	2.165e-11
2	104154456	rs10173184	T	C	0.46198	-0.010178	0.0017481	5.80898e-09	330069	-1.454	0.146
12	112486818	rs17696736	G	A	0.41253	0.010205	0.0017532	5.86138e-09	330069	0.794	0.4275
1	183286777	rs10911305	A	G	0.47874	-0.010172	0.0017477	5.88437e-09	330069	5.26	1.439e-07
5	112113760	rs401908	C	T	0.63837	-0.010112	0.0017376	5.91153e-09	330069	-0.592	0.5541
2	76479233	rs10168901	G	C	0.19606	0.010101	0.0017359	5.92652e-09	330069	-0.229	0.8191
2	104155277	rs6736873	G	T	0.46204	-0.010169	0.0017481	5.98963e-09	330069	-0.932	0.3514
2	104297677	rs264942	C	A	0.54033	0.010144	0.0017446	6.07995e-09	330069	1.418	0.1562
9	76927907	rs4364690	G	A	0.72751	0.010334	0.0017774	6.10801e-09	330069	-2.624	0.008682
2	76384145	rs17012249	G	C	0.20331	0.010092	0.0017358	6.10942e-09	330069	-0.01	0.9924
2	76386797	rs34236297	A	T	0.20471	0.010115	0.0017399	6.11928e-09	330069	-0.045	0.9639
2	175101374	rs74869985	G	A	0.18922	0.010001	0.0017204	6.13056e-09	330069	-1.109	0.2675
9	76926329	rs10869386	C	T	0.7275	0.010332	0.0017775	6.15177e-09	330069	-2.647	0.008123
2	76465288	rs35430959	C	T	0.19586	0.010032	0.0017259	6.1546e-09	330069	-0.148	0.8826
9	76927526	rs10781220	C	T	0.72751	0.010331	0.0017774	6.16737e-09	330069	-2.621	0.008768
1	183323643	rs10911318	T	C	0.4644	-0.010148	0.0017465	6.23878e-09	330069	5.276	1.32e-07
2	104157507	rs6742125	G	A	0.46311	-0.010166	0.00175	6.29071e-09	330069	-1.519	0.1287
12	112067387	rs7972674	A	G	0.18501	-0.01049	0.001806	6.30812e-09	330069	-3.216	0.0013
2	175099649	rs1866640	A	G	0.18922	0.009993	0.0017204	6.30957e-09	330069	-1.11	0.267
12	112064897	rs9300319	C	T	0.19248	-0.010772	0.001855	6.35916e-09	330069	-3.198	0.001385
2	104067744	rs266065	A	G	0.56129	0.010142	0.0017464	6.36063e-09	330069	0.677	0.4982
5	139652057	rs13186198	A	G	0.45259	-0.010147	0.0017474	6.37382e-09	330069	-5.719	1.071e-08
7	44936916	rs62460537	G	A	0.069754	-0.010035	0.0017282	6.37676e-09	330069	3.035	0.002407
12	111910219	rs10774625	G	A	0.52353	-0.010248	0.0017648	6.38263e-09	330069	-1.921	0.05468
5	139689505	rs10077671	G	A	0.54049	0.010131	0.0017448	6.39882e-09	330069	5.435	5.493e-08
5	139649201	rs2337082	A	G	0.45253	-0.010145	0.0017475	6.41653e-09	330069	-5.69	1.267e-08
2	76383468	rs17040450	T	C	0.20385	0.010087	0.0017374	6.418e-09	330069	-0.025	0.9799
2	104156925	rs11123961	A	G	0.46206	-0.010148	0.001748	6.42244e-09	330069	-1.437	0.1506
12	112096215	rs10744775	C	T	0.27322	-0.010632	0.0018314	6.43724e-09	330069	-1.619	0.1055
5	112201054	rs2545156	G	A	0.53526	-0.010163	0.0017509	6.46398e-09	330069	0.632	0.5275
2	76324494	rs12996790	C	A	0.20294	0.010033	0.0017288	6.49083e-09	330069	0.192	0.8479
5	139654115	rs2116790	A	G	0.45252	-0.010141	0.0017475	6.50279e-09	330069	-5.697	1.223e-08
1	183323804	rs12125953	A	G	0.46428	-0.010137	0.0017467	6.51178e-09	330069	5.28	1.295e-07
2	104158242	rs11900028	C	T	0.46207	-0.010143	0.001748	6.53582e-09	330069	-1.426	0.1538
5	112170358	rs458967	A	G	0.63803	-0.010086	0.0017384	6.5675e-09	330069	-0.642	0.521
2	175099860	rs1866642	G	C	0.19341	0.010039	0.0017305	6.58567e-09	330069	-1.096	0.2729
2	104068344	rs266066	G	A	0.5649	0.010111	0.0017428	6.59022e-09	330069	0.686	0.4929
2	104158394	rs11893460	T	C	0.46222	-0.010141	0.0017482	6.60998e-09	330069	-1.459	0.1444
2	104158003	rs10186090	G	C	0.46222	-0.01014	0.0017483	6.62522e-09	330069	-1.442	0.1494
2	76395829	rs13002280	G	A	0.20505	0.010099	0.0017414	6.6558e-09	330069	0.036	0.9712
5	139543091	rs175086	A	G	0.53472	0.010145	0.0017495	6.69422e-09	330069	5.301	1.153e-07
5	112223594	rs712663	C	T	0.35784	0.010234	0.001765	6.7112e-09	330069	0.49	0.6241
2	76391302	rs34007713	T	C	0.20483	0.010088	0.0017402	6.74217e-09	330069	0.017	0.9868
12	112520883	rs2339973	T	C	0.30134	-0.010494	0.0018105	6.78422e-09	330069	-1.291	0.1968
2	76328947	rs6743989	G	A	0.21203	0.010167	0.0017543	6.81554e-09	330069	0.131	0.8959
11	46711778	rs10838613	C	A	0.84546	-0.010043	0.0017328	6.81711e-09	330069	2.478	0.01322
5	139666906	rs10477348	T	A	0.45057	-0.010122	0.0017469	6.86594e-09	330069	-5.239	1.617e-07
2	76322420	rs9750968	G	C	0.2124	0.010175	0.0017561	6.88494e-09	330069	0.136	0.8915
2	76389335	rs35787624	G	A	0.20481	0.010079	0.0017398	6.89604e-09	330069	-0.046	0.963
6	109020332	rs557544	C	T	0.31864	0.010194	0.0017597	6.90399e-09	330069	-4.478	7.532e-06
2	104298541	rs264943	A	C	0.53979	0.010099	0.0017439	7.00648e-09	330069	1.388	0.1652
2	76330933	rs6752103	T	A	0.21151	0.010152	0.0017531	7.00648e-09	330069	0.145	0.8846
7	44934763	rs73102154	A	G	0.062125	-0.010027	0.0017321	7.08435e-09	330069	3.119	0.001814
5	112158431	rs2545162	A	G	0.63883	-0.010089	0.0017428	7.08761e-09	330069	-0.577	0.5637
11	46691737	rs4606447	G	A	0.73501	-0.010443	0.0018041	7.10395e-09	330069	2.634	0.008444
7	44974841	rs62461360	C	T	0.070116	-0.010065	0.0017391	7.13346e-09	330069	3.044	0.002337
5	139646962	rs6580473	G	A	0.45246	-0.010114	0.0017475	7.13674e-09	330069	-5.697	1.221e-08
2	104060788	rs1368547	C	T	0.5653	0.010087	0.0017429	7.15814e-09	330069	0.667	0.505
5	112234834	rs153551	G	T	0.46759	0.010144	0.0017532	7.2144e-09	330069	-0.69	0.4902
5	112169525	rs2546111	A	T	0.63811	-0.010059	0.0017385	7.2144e-09	330069	-0.512	0.6084
2	76328608	rs6715402	A	G	0.21206	0.010148	0.0017543	7.2778e-09	330069	0.13	0.8962
2	174932562	rs7561190	T	C	0.2731	0.01006	0.0017391	7.28618e-09	330069	-1.768	0.07711
2	76329480	rs12713862	C	A	0.21253	0.01016	0.0017568	7.33331e-09	330069	0.107	0.9144
5	112187436	rs382427	G	A	0.53403	-0.010142	0.0017537	7.33669e-09	330069	0.907	0.3646
2	76326239	rs12987001	C	T	0.20257	0.0099978	0.0017288	7.34176e-09	330069	0.131	0.8959
5	112192072	rs374613	G	A	0.54075	-0.010127	0.0017512	7.34514e-09	330069	0.867	0.3857
5	112200028	rs351768	A	T	0.53582	-0.010145	0.0017543	7.35529e-09	330069	0.831	0.4059
5	112245147	rs469886	T	G	0.45113	0.010102	0.0017473	7.42677e-09	330069	-1.008	0.3132
2	175113695	rs7583288	A	G	0.19441	0.0099606	0.001723	7.43533e-09	330069	-1.056	0.2909
5	139635747	rs62385161	C	T	0.45257	-0.010101	0.0017475	7.46449e-09	330069	-5.749	8.989e-09
2	76328829	rs71418795	T	C	0.20255	0.0099919	0.0017287	7.48342e-09	330069	0.177	0.8595
17	44119367	rs8064986	G	A	0.54854	-0.010083	0.0017445	7.48514e-09	330069	-2.154	0.03124
2	56477224	rs11695736	A	G	0.3728	-0.010056	0.0017401	7.52835e-09	330069	3.12	0.001809
2	76328464	rs35727414	G	A	0.20253	0.0099885	0.0017288	7.5753e-09	330069	0.182	0.8555
2	104060568	rs7562738	A	G	0.56526	0.010069	0.0017429	7.59626e-09	330069	0.648	0.5173
5	112196949	rs460137	C	A	0.5372	-0.010112	0.0017515	7.77857e-09	330069	0.885	0.3763
11	45126783	rs875973	C	T	0.39432	-0.010124	0.0017536	7.78037e-09	330069	-0.393	0.6946
7	44976233	rs56367512	C	G	0.070772	-0.010047	0.0017409	7.89223e-09	330069	3.071	0.002135
13	58689340	rs2321387	G	A	0.4553	-0.010066	0.0017444	7.89951e-09	330069	2.784	0.005374
11	46697142	rs57744667	T	C	0.15696	0.009982	0.0017298	7.90861e-09	330069	-2.911	0.003604
17	44237751	rs117319569	T	C	0.060251	-0.0097651	0.0016926	7.9671e-09	330069	1.532	0.1254
12	112062875	rs1544396	C	T	0.18453	-0.010399	0.001803	8.05193e-09	330069	-3.158	0.001586
5	112242139	rs469827	A	C	0.3511	0.010105	0.0017523	8.10214e-09	330069	0.56	0.5756
5	112194144	rs505382	C	A	0.53922	-0.010119	0.0017549	8.11708e-09	330069	0.618	0.5365
12	112060388	rs11065980	G	C	0.18402	-0.010387	0.0018015	8.14892e-09	330069	-3.229	0.001243
17	44161581	rs11079732	C	T	0.54829	-0.010056	0.0017447	8.24328e-09	330069	-2.206	0.02738
5	139653439	rs6889283	T	G	0.45352	-0.010069	0.0017473	8.30042e-09	330069	-5.698	1.21e-08
12	112849899	rs7300285	A	G	0.36315	-0.010387	0.0018026	8.31189e-09	330069	-1.146	0.2517
12	112052651	rs66480035	C	T	0.29062	-0.010498	0.0018221	8.34257e-09	330069	-1.091	0.2754
2	175119124	rs113634434	A	T	0.19515	0.009926	0.0017228	8.34449e-09	330069	-1.025	0.3053
2	76397508	rs67496128	T	A	0.20607	0.010052	0.0017447	8.34834e-09	330069	0.019	0.985
5	139648183	rs2053056	C	A	0.4535	-0.010067	0.0017474	8.37336e-09	330069	-5.712	1.119e-08
5	139646776	rs2053055	T	C	0.4535	-0.010066	0.0017474	8.40621e-09	330069	-5.703	1.179e-08
5	139654664	rs13359519	A	G	0.45482	-0.010065	0.0017474	8.41201e-09	330069	-5.722	1.055e-08
2	175111848	rs73037875	A	G	0.1939	0.0099165	0.0017218	8.45474e-09	330069	-1.008	0.3136
2	76400220	rs7572341	T	G	0.20498	0.010023	0.0017405	8.48594e-09	330069	-0.026	0.9792
2	76396834	rs11678895	A	C	0.20497	0.01003	0.001742	8.52315e-09	330069	-0.103	0.9178
5	139654537	rs13353827	C	T	0.4548	-0.01006	0.0017474	8.55658e-09	330069	-5.735	9.754e-09
5	139654732	rs6879174	G	A	0.45349	-0.010058	0.0017473	8.59409e-09	330069	-5.712	1.116e-08
12	49457635	rs11168839	A	G	0.38935	0.010043	0.0017449	8.64371e-09	330069	6.138	8.346e-10
17	44105395	rs7521	G	A	0.55026	-0.010036	0.0017438	8.65566e-09	330069	-2.127	0.0334
12	112047571	rs11065976	C	T	0.29018	-0.010482	0.0018217	8.71967e-09	330069	-1.13	0.2586
2	76310296	rs10205242	A	G	0.21227	0.010098	0.0017549	8.71967e-09	330069	0.119	0.9052
5	139646026	rs7737543	G	A	0.45481	-0.010051	0.0017475	8.84301e-09	330069	-5.731	9.984e-09
2	175123455	rs73037888	C	G	0.19447	0.0099152	0.001724	8.86339e-09	330069	-0.821	0.4115
5	139641896	rs6867870	A	C	0.45347	-0.010049	0.0017474	8.88178e-09	330069	-5.714	1.107e-08
2	76400441	rs11673856	G	A	0.20489	0.010009	0.0017404	8.88996e-09	330069	-0.06	0.9524
2	76310280	rs35475961	A	G	0.20297	0.0099418	0.0017289	8.9043e-09	330069	0.145	0.8845
12	112086810	rs10744773	A	C	0.19264	-0.010664	0.0018549	8.97016e-09	330069	-3.242	0.001189
5	139633042	rs1864970	C	T	0.45455	-0.010043	0.001747	8.99912e-09	330069	-5.76	8.404e-09
17	44163809	rs2158258	C	A	0.5472	-0.010033	0.0017458	9.10961e-09	330069	-2.092	0.03646
5	139654951	rs6896007	A	G	0.45248	-0.010042	0.0017475	9.13061e-09	330069	-5.618	1.936e-08
17	44162230	rs11654640	A	G	0.54707	-0.010031	0.0017458	9.1622e-09	330069	-2.241	0.02505
5	139642414	rs2337081	C	A	0.45358	-0.01004	0.0017474	9.17698e-09	330069	-5.706	1.156e-08
2	76309964	rs17750877	G	C	0.20281	0.0099332	0.0017289	9.1791e-09	330069	0.176	0.8606
5	139640476	rs13177186	G	A	0.45355	-0.010039	0.0017474	9.1939e-09	330069	-5.71	1.128e-08
5	139536922	rs269767	G	A	0.46886	-0.010057	0.0017508	9.24698e-09	330069	-5.346	8.971e-08
5	139630862	rs6863474	T	C	0.45358	-0.010031	0.0017474	9.45366e-09	330069	-5.744	9.246e-09
2	162852079	rs4140685	T	G	0.31236	-0.010028	0.0017471	9.47545e-09	330069	6.942	3.861e-12
2	104166430	rs13415620	T	C	0.4604	-0.010004	0.0017429	9.47982e-09	330069	-1.694	0.09021
12	112086503	rs10774632	G	A	0.19268	-0.010646	0.0018548	9.49292e-09	330069	-3.363	0.00077
2	104179699	rs10174328	T	C	0.45978	-0.010005	0.0017433	9.50824e-09	330069	-1.688	0.09133
5	139628163	rs7730245	A	C	0.45365	-0.010026	0.0017471	9.53894e-09	330069	-5.739	9.539e-09
12	112103148	rs3742001	T	C	0.19276	-0.010644	0.0018547	9.54773e-09	330069	-3.301	0.0009626
12	112070977	rs73416497	A	T	0.18708	-0.010374	0.0018078	9.56974e-09	330069	-3.224	0.001265
2	104179662	rs10174252	G	C	0.45986	-0.010001	0.0017433	9.63385e-09	330069	-1.701	0.08895
2	104167879	rs11899332	T	C	0.45995	-0.010001	0.0017432	9.63607e-09	330069	-1.738	0.08222
2	104185339	rs11894393	G	A	0.45987	-0.010001	0.0017433	9.64717e-09	330069	-1.702	0.08882
2	104162375	rs4851655	A	G	0.45985	-0.010001	0.0017433	9.65384e-09	330069	-1.773	0.07616
2	104187685	rs57331664	C	A	0.45985	-0.010001	0.0017433	9.65606e-09	330069	-1.692	0.09064
5	139621570	rs12188849	A	G	0.45439	-0.010023	0.0017474	9.68724e-09	330069	-5.738	9.589e-09
2	104162842	rs4851657	C	T	0.45985	-0.0099997	0.0017433	9.68947e-09	330069	-1.721	0.08528
2	104170265	rs10184356	A	G	0.45988	-0.0099993	0.0017432	9.68947e-09	330069	-1.711	0.08701
2	104170556	rs12466543	G	A	0.45988	-0.0099993	0.0017432	9.68947e-09	330069	-1.701	0.08892
2	104163560	rs6722293	C	G	0.45985	-0.0099996	0.0017433	9.6917e-09	330069	-1.751	0.08003
1	183338207	rs673593	T	G	0.471	-0.0099968	0.0017428	9.69617e-09	330069	5.241	1.595e-07
7	44950415	rs28394383	T	C	0.072705	-0.0099441	0.0017336	9.6984e-09	330069	3.064	0.002184
2	104162463	rs4851656	A	T	0.45985	-0.0099994	0.0017433	9.6984e-09	330069	-1.756	0.07911
2	104179749	rs10186556	T	A	0.46016	-0.0099976	0.0017431	9.72076e-09	330069	-1.709	0.08742
5	139627813	rs9686454	C	T	0.45367	-0.010017	0.0017464	9.72747e-09	330069	-5.754	8.729e-09
2	104166800	rs6742718	G	C	0.45988	-0.0099982	0.0017432	9.72747e-09	330069	-1.241	0.2147
2	104166330	rs13389342	C	G	0.45985	-0.0099982	0.0017433	9.74092e-09	330069	-1.708	0.08757
2	104187523	rs60608011	A	C	0.45986	-0.0099973	0.0017433	9.76787e-09	330069	-1.693	0.09052
5	139623901	rs1142828	T	G	0.45365	-0.010021	0.0017474	9.77012e-09	330069	-5.8	6.621e-09
12	112140409	rs592311	C	T	0.18528	-0.010375	0.0018091	9.77012e-09	330069	-3.386	0.0007101
2	104174496	rs6713948	C	T	0.46003	-0.0099961	0.0017431	9.77462e-09	330069	-1.693	0.09044
2	162879452	rs2302873	C	T	0.30963	-0.010007	0.0017453	9.82879e-09	330069	6.965	3.285e-12
2	104166500	rs6712904	A	G	0.45989	-0.0099943	0.0017432	9.85145e-09	330069	-1.728	0.08396
2	104177586	rs13398567	T	A	0.45988	-0.0099942	0.0017432	9.86279e-09	330069	-1.7	0.08916
2	104177085	rs6725608	C	T	0.45988	-0.0099942	0.0017432	9.86279e-09	330069	-1.69	0.09094
2	104171172	rs13382396	T	C	0.46003	-0.0099929	0.0017431	9.8787e-09	330069	-1.709	0.08749
2	104168736	rs4851659	A	G	0.46003	-0.0099929	0.0017431	9.8787e-09	330069	-1.708	0.0877
2	104187889	rs13402723	T	C	0.45985	-0.009994	0.0017433	9.88098e-09	330069	-1.688	0.0915
2	104171464	rs6720153	G	A	0.45988	-0.0099933	0.0017432	9.89008e-09	330069	-1.706	0.088
2	104184130	rs9941588	G	A	0.4597	-0.0099935	0.0017432	9.89008e-09	330069	-1.679	0.09307
2	104177804	rs6708478	T	C	0.45985	-0.0099937	0.0017433	9.89236e-09	330069	-1.699	0.08932
2	104175323	rs7568612	G	T	0.45988	-0.0099929	0.0017432	9.90376e-09	330069	-1.701	0.08893
2	104174316	rs6753094	T	C	0.45988	-0.009993	0.0017432	9.90376e-09	330069	-1.697	0.08974
2	104175913	rs1567959	A	G	0.45988	-0.009993	0.0017432	9.90376e-09	330069	-1.696	0.08994
2	104173982	rs13424904	A	C	0.45988	-0.0099929	0.0017432	9.90376e-09	330069	-1.695	0.09004
2	104179269	rs6716087	A	C	0.46003	-0.0099921	0.0017431	9.90832e-09	330069	-1.706	0.08794
2	104171783	rs6720582	G	A	0.46003	-0.0099917	0.0017431	9.91973e-09	330069	-1.706	0.08807
5	139636570	rs13177454	C	T	0.45481	-0.010017	0.0017475	9.93116e-09	330069	-5.748	9.022e-09
2	104172815	rs2084812	C	T	0.46003	-0.0099913	0.0017431	9.93116e-09	330069	-1.715	0.08627
2	104173280	rs4599141	T	A	0.46003	-0.0099913	0.0017431	9.93345e-09	330069	-1.705	0.08816
5	112250361	rs149193	C	A	0.46461	0.010053	0.0017541	9.99079e-09	330069	-0.701	0.4834
2	104172144	rs6708871	T	C	0.45985	-0.0099849	0.0017432	1.01719e-08	330069	-1.731	0.08345
12	112090814	rs12579287	G	A	0.19268	-0.010624	0.0018549	1.01883e-08	330069	-3.227	0.001252
1	183330413	rs2811558	T	G	0.47081	-0.0099804	0.001743	1.02896e-08	330069	5.32	1.035e-07
2	104170019	rs10173461	G	A	0.45986	-0.0099812	0.0017432	1.03062e-08	330069	-1.71	0.08719
2	104166182	rs12465553	A	G	0.45999	-0.0099802	0.001743	1.03086e-08	330069	-1.676	0.09377
2	104172374	rs1073892	T	C	0.46003	-0.0099798	0.0017431	1.033e-08	330069	-1.696	0.0898
5	112224389	rs455412	T	G	0.35289	0.010054	0.0017562	1.03538e-08	330069	0.466	0.6415
7	44931669	rs73102146	T	G	0.062797	-0.0099496	0.0017379	1.03586e-08	330069	3.125	0.001778
5	139614795	rs4913077	C	T	0.45432	-0.010003	0.0017474	1.03825e-08	330069	-5.746	9.121e-09
5	112224331	rs458451	C	T	0.35291	0.010053	0.0017562	1.04064e-08	330069	0.44	0.66
5	112185513	rs566419	C	A	0.52063	-0.010034	0.0017534	1.04833e-08	330069	1.065	0.287
5	112225148	rs460832	A	G	0.35289	0.010049	0.0017562	1.05269e-08	330069	0.443	0.6575
5	112226874	rs818424	A	G	0.35288	0.010047	0.0017562	1.05901e-08	330069	0.523	0.6013
12	112245170	rs11066028	C	A	0.29641	-0.01038	0.0018144	1.06072e-08	330069	-1.099	0.2719
2	162874170	rs2300757	C	G	0.31048	-0.0099872	0.001746	1.06512e-08	330069	6.985	2.849e-12
2	76438298	rs6761061	G	A	0.1936	0.0098808	0.0017274	1.06512e-08	330069	-0.065	0.9481
1	183313912	rs10911316	C	T	0.5112	-0.010006	0.0017492	1.06586e-08	330069	5.025	5.025e-07
5	139636127	rs35214989	C	T	0.45525	-0.0099953	0.0017476	1.07004e-08	330069	-5.722	1.052e-08
5	112219961	rs818430	C	T	0.46582	0.010025	0.0017528	1.07127e-08	330069	-0.731	0.4646
5	112220613	rs818428	T	A	0.46575	0.010023	0.0017528	1.07895e-08	330069	-0.736	0.4615
2	76379915	rs17701527	T	C	0.20329	0.0099001	0.0017315	1.08168e-08	330069	0.046	0.9635
7	44931066	rs56365715	G	A	0.062647	-0.0099278	0.0017368	1.09069e-08	330069	3.151	0.001629
12	112099245	rs10774634	G	A	0.19277	-0.010601	0.0018547	1.09194e-08	330069	-3.062	0.0022
2	162867613	rs10166311	A	G	0.31028	-0.0099764	0.0017457	1.09977e-08	330069	7.01	2.387e-12
11	45121892	rs12363092	T	G	0.25942	-0.0099357	0.0017386	1.09977e-08	330069	-0.598	0.5501
2	162877028	rs12692646	A	T	0.30934	-0.0099713	0.0017449	1.10078e-08	330069	7.013	2.33e-12
5	112204896	rs368575	A	C	0.53501	-0.010024	0.0017542	1.10205e-08	330069	0.716	0.4738
5	139599097	rs10060071	C	T	0.45423	-0.0099844	0.0017473	1.10281e-08	330069	-5.742	9.334e-09
5	112159562	rs2545159	G	A	0.64913	-0.0099281	0.0017375	1.10357e-08	330069	-0.556	0.5781
2	76306375	rs17750689	G	A	0.20288	0.009879	0.0017289	1.10382e-08	330069	0.161	0.8723
5	139700578	rs10061835	C	T	0.53903	0.0099655	0.0017443	1.1102e-08	330069	5.545	2.935e-08
2	76381075	rs17752567	C	G	0.21282	0.0099207	0.0017365	1.11096e-08	330069	0.165	0.8688
11	46693169	rs61884295	A	G	0.15824	0.0099008	0.0017331	1.11199e-08	330069	-2.898	0.003753
3	23240671	rs1032501	C	G	0.40276	0.010036	0.0017568	1.1125e-08	330069	0.245	0.8067
2	76356721	rs1608587	G	A	0.20225	0.0098779	0.0017291	1.11301e-08	330069	0.104	0.9171
12	112113658	rs7136874	T	C	0.19278	-0.010592	0.0018546	1.12383e-08	330069	-3.246	0.00117
12	112141570	rs847892	A	G	0.34739	-0.010331	0.001809	1.12564e-08	330069	-1.651	0.09878
12	112145100	rs610303	A	C	0.3471	-0.010329	0.001809	1.1337e-08	330069	-1.689	0.09129
2	76357903	rs744235	G	A	0.20273	0.0098766	0.00173	1.13632e-08	330069	0.134	0.8931
11	45060406	rs4755930	A	G	0.39559	-0.0099257	0.0017386	1.13841e-08	330069	0.948	0.3433
2	76441866	rs35731561	G	A	0.19214	0.0098383	0.0017237	1.1471e-08	330069	-0.024	0.9809
2	76357302	rs68152182	G	A	0.20218	0.0098687	0.0017291	1.14762e-08	330069	0.129	0.8975
5	112220534	rs818429	C	T	0.35706	0.010073	0.0017652	1.15213e-08	330069	0.503	0.6152
2	76379167	rs35964749	G	A	0.20211	0.0098658	0.0017289	1.15531e-08	330069	0.089	0.9292
2	175127560	rs80031872	G	A	0.19337	0.0098322	0.0017231	1.15664e-08	330069	-1.04	0.2983
12	112094766	rs7977828	G	A	0.18618	-0.010335	0.0018113	1.15904e-08	330069	-3.26	0.001115
2	162867622	rs10166124	T	C	0.31059	-0.0099619	0.0017463	1.16681e-08	330069	7.003	2.511e-12
11	46695483	rs56349329	A	G	0.15783	0.0098759	0.0017314	1.17085e-08	330069	-2.926	0.003435
2	104195314	rs1597750	A	G	0.45989	-0.0099453	0.0017436	1.17193e-08	330069	-1.735	0.0828
5	112245987	rs468610	A	G	0.34934	0.0099936	0.0017521	1.17247e-08	330069	0.632	0.5275
1	183322317	rs779152	G	A	0.47105	-0.0099425	0.0017432	1.17463e-08	330069	5.227	1.723e-07
12	112521448	rs4767364	A	G	0.30337	-0.010319	0.0018092	1.17598e-08	330069	-1.445	0.1484
12	112463296	rs4767293	G	A	0.35148	-0.010317	0.0018091	1.17733e-08	330069	-1.286	0.1984
2	76364051	rs71420904	T	C	0.20223	0.0098606	0.0017291	1.18005e-08	330069	0.132	0.8952
12	112142110	rs682212	T	C	0.18517	-0.010316	0.0018092	1.18331e-08	330069	-3.386	0.0007089
2	76363083	rs13009289	T	A	0.20287	0.0098663	0.0017303	1.18413e-08	330069	0.13	0.8966
5	112210415	rs419155	T	A	0.53332	-0.010001	0.001754	1.18741e-08	330069	0.673	0.5009
5	112210966	rs448613	C	T	0.53381	-0.0099937	0.001753	1.19344e-08	330069	0.654	0.513
7	44961850	rs7790898	C	T	0.79226	0.010035	0.0017604	1.19784e-08	330069	0.897	0.3699
2	76363928	rs56042228	T	C	0.20219	0.0098559	0.0017291	1.19922e-08	330069	0.117	0.9069
2	104193230	rs6751174	T	C	0.45989	-0.0099382	0.0017436	1.20033e-08	330069	-1.701	0.08901
2	104271898	rs264920	G	A	0.54115	0.0099381	0.0017436	1.2006e-08	330069	1.502	0.1331
2	104197609	rs12327970	G	T	0.45989	-0.0099376	0.0017436	1.20282e-08	330069	-1.701	0.08903
2	175107363	rs78273711	G	A	0.19267	0.0098099	0.0017213	1.20531e-08	330069	-1.112	0.2663
2	76363486	rs13010209	G	A	0.20203	0.0098522	0.0017289	1.20948e-08	330069	0.096	0.9238
2	76364921	rs13007345	A	T	0.20286	0.0098577	0.00173	1.21199e-08	330069	0.083	0.9339
2	76375756	rs11676113	C	T	0.20311	0.0098614	0.0017307	1.21283e-08	330069	0.111	0.9118
12	49427652	rs3782357	T	C	0.39154	0.009956	0.0017473	1.21423e-08	330069	6.124	9.145e-10
5	112248466	rs153544	C	T	0.4621	0.00999	0.0017536	1.22096e-08	330069	-0.766	0.4434
2	162859000	rs7565794	C	T	0.31326	-0.0099496	0.0017466	1.22293e-08	330069	6.907	4.965e-12
1	183327866	rs634375	T	C	0.47058	-0.0099299	0.0017434	1.22885e-08	330069	5.275	1.33e-07
12	112848570	rs3759377	G	A	0.29969	-0.010349	0.0018171	1.2331e-08	330069	-0.891	0.3728
12	112132632	rs618358	T	C	0.18407	-0.010267	0.0018027	1.23367e-08	330069	-3.368	0.0007572
2	76369761	rs34905192	T	G	0.20208	0.0098452	0.001729	1.23965e-08	330069	0.124	0.9016
2	76340405	rs71418798	A	G	0.204	0.0098669	0.0017328	1.24022e-08	330069	0.146	0.8841
12	112835334	rs10850036	C	T	0.29893	-0.010321	0.001813	1.25256e-08	330069	-0.828	0.4077
5	139698110	rs6580515	C	A	0.53717	0.0099295	0.0017443	1.25401e-08	330069	5.545	2.94e-08
5	139559014	rs11750229	G	T	0.54383	0.0099504	0.0017481	1.25545e-08	330069	5.755	8.663e-09
2	76365716	rs12987556	A	C	0.20259	0.0098452	0.0017297	1.25893e-08	330069	0.106	0.9158
5	139589309	rs12717951	G	A	0.45558	-0.0099468	0.0017477	1.26038e-08	330069	-5.729	1.011e-08
5	112211610	rs712670	A	G	0.53403	-0.0099763	0.001753	1.26357e-08	330069	0.669	0.5036
2	76335351	rs10188424	T	C	0.21113	0.0099874	0.001755	1.26445e-08	330069	0.128	0.8978
2	104189306	rs17336684	A	G	0.46034	-0.0099206	0.0017433	1.26648e-08	330069	-1.707	0.08783
5	112199199	rs351770	A	C	0.64478	-0.010002	0.0017577	1.26911e-08	330069	-0.393	0.6941
2	76334796	rs12713863	G	A	0.21081	0.0099765	0.0017532	1.26911e-08	330069	0.134	0.8934
2	76376895	rs11682975	G	A	0.20274	0.009844	0.00173	1.26911e-08	330069	0.076	0.9397
2	162851147	rs12617656	C	T	0.31273	-0.0099403	0.0017469	1.27087e-08	330069	6.926	4.334e-12
2	76370861	rs10496202	G	T	0.20209	0.0098369	0.0017289	1.27409e-08	330069	0.162	0.8714
2	76368328	rs1975400	T	C	0.20211	0.0098364	0.0017289	1.27732e-08	330069	0.099	0.9214
12	112090779	rs12582964	T	C	0.1849	-0.010268	0.0018049	1.27761e-08	330069	-3.315	0.0009156
5	112216189	rs456531	C	T	0.46587	0.0099726	0.0017529	1.2782e-08	330069	-0.767	0.443
2	76297115	rs72822707	C	G	0.20239	0.009836	0.0017289	1.27879e-08	330069	0.198	0.8427
5	139558808	rs11745502	A	G	0.54452	0.0099414	0.0017477	1.28499e-08	330069	5.744	9.24e-09
2	76365497	rs113781666	A	G	0.20222	0.009835	0.0017292	1.28825e-08	330069	0.147	0.8834
5	139586501	rs2436390	A	G	0.54375	0.0099412	0.0017481	1.29539e-08	330069	5.75	8.946e-09
12	111904371	rs4766578	A	T	0.52394	-0.010036	0.0017648	1.29688e-08	330069	-1.864	0.06226
11	46378032	rs12576115	A	G	0.16722	0.0098736	0.0017364	1.30047e-08	330069	-3.037	0.002392
5	112212151	rs3317	A	G	0.53367	-0.0099726	0.0017539	1.30317e-08	330069	0.67	0.5029
5	139557385	rs2436391	T	C	0.54455	0.0099365	0.0017477	1.30557e-08	330069	5.757	8.541e-09
12	112093078	rs2285727	T	G	0.18488	-0.010261	0.0018049	1.30587e-08	330069	-3.305	0.0009482
2	76373326	rs12993003	G	A	0.20229	0.0098309	0.0017292	1.30647e-08	330069	0.119	0.905
2	76371231	rs72822774	T	A	0.20206	0.0098288	0.0017289	1.30798e-08	330069	0.109	0.9133
7	44963866	rs2057842	T	G	0.79206	0.010012	0.0017611	1.31039e-08	330069	0.868	0.3854
12	112146555	rs627308	A	C	0.18524	-0.010284	0.0018093	1.31826e-08	330069	-3.314	0.0009186
5	112248738	rs154344	C	T	0.46218	0.0099666	0.0017535	1.31886e-08	330069	-0.8	0.4235
12	112073916	rs3809276	G	A	0.18585	-0.010246	0.0018028	1.32038e-08	330069	-3.265	0.001095
5	139581773	rs421211	A	G	0.54423	0.009933	0.0017478	1.32373e-08	330069	5.897	3.707e-09
12	112204427	rs886205	G	A	0.19158	-0.010518	0.0018508	1.32526e-08	330069	-3.346	0.0008201
2	76367509	rs34951587	G	A	0.20274	0.0098299	0.00173	1.33137e-08	330069	0.119	0.9055
10	63670814	rs7075591	A	G	0.34349	0.0098564	0.0017347	1.33291e-08	330069	-1.389	0.1649
6	128332084	rs13219424	T	C	0.30889	-0.0098881	0.0017403	1.33414e-08	330069	4.568	4.916e-06
7	44964910	rs10951777	A	G	0.79333	0.0099644	0.0017538	1.33567e-08	330069	0.886	0.3755
2	56443479	rs59813060	T	A	0.24709	-0.0098041	0.0017258	1.33999e-08	330069	4.731	2.236e-06
2	76290867	rs13033451	C	T	0.20241	0.0098224	0.001729	1.34091e-08	330069	0.16	0.8729
18	34668147	rs323299	T	G	0.35311	-0.0099819	0.0017571	1.34215e-08	330069	0.577	0.5637
5	139623591	rs7717576	A	G	0.45912	-0.0099422	0.0017504	1.34865e-08	330069	-5.682	1.334e-08
2	76334588	rs13030138	T	C	0.21083	0.0099579	0.0017532	1.35052e-08	330069	0.126	0.8996
2	76305424	rs12987316	T	C	0.21134	0.0099572	0.0017533	1.35457e-08	330069	0.176	0.8601
12	112025475	rs7301040	A	T	0.16436	-0.0099887	0.0017589	1.35581e-08	330069	-1.73	0.08366
5	139623592	rs7732649	A	C	0.45882	-0.009939	0.0017505	1.3649e-08	330069	-5.704	1.173e-08
7	44929816	rs62460532	A	G	0.065739	-0.0098475	0.0017344	1.36647e-08	330069	2.709	0.00674
5	112187356	rs395858	A	G	0.53205	-0.0099346	0.0017498	1.36647e-08	330069	0.884	0.3769
2	56443708	rs17047623	T	C	0.24706	-0.0097973	0.0017257	1.37088e-08	330069	4.734	2.205e-06
5	112245936	rs468854	T	C	0.34941	0.0099433	0.0017522	1.38931e-08	330069	0.602	0.5473
12	112120170	rs646275	T	C	0.19155	-0.01047	0.0018453	1.39733e-08	330069	-3.42	0.0006262
5	112228667	rs430665	A	G	0.34971	0.0099426	0.0017524	1.39798e-08	330069	0.27	0.7868
11	46352266	rs61882674	G	C	0.166	0.0098273	0.0017323	1.40572e-08	330069	-2.633	0.008461
2	76334047	rs35861585	G	C	0.20189	0.0098068	0.0017288	1.4067e-08	330069	0.238	0.8118
5	112236297	rs153549	G	A	0.51389	0.0099294	0.0017504	1.40734e-08	330069	-1.02	0.3077
2	76339780	rs17700671	G	A	0.20188	0.0098053	0.0017287	1.41286e-08	330069	0.157	0.8749
2	162863959	rs6432707	T	A	0.31406	-0.0099091	0.0017471	1.41514e-08	330069	6.893	5.467e-12
2	104203551	rs7578295	G	A	0.45995	-0.0098884	0.0017436	1.41873e-08	330069	-1.694	0.09029
2	76303398	rs6547046	C	T	0.21153	0.0099529	0.0017551	1.42069e-08	330069	0.173	0.8629
2	174956114	rs935399	G	A	0.25183	0.010015	0.0017663	1.42594e-08	330069	-2.15	0.03152
2	76429544	rs997292	C	G	0.19304	0.0097948	0.0017279	1.43979e-08	330069	-0.261	0.7943
2	76334392	rs71418796	A	T	0.20186	0.0098	0.0017288	1.44012e-08	330069	0.183	0.855
2	175117091	rs6717373	G	A	0.19614	0.0097662	0.0017228	1.44046e-08	330069	-1.114	0.2653
7	44960878	rs7802516	G	A	0.79211	0.0099788	0.0017606	1.44611e-08	330069	0.804	0.4212
2	175085762	rs16862481	A	T	0.32259	0.010001	0.0017646	1.45077e-08	330069	-2.229	0.02583
2	104207812	rs13398688	G	A	0.45991	-0.0098802	0.0017436	1.45781e-08	330069	-1.695	0.09006
9	86528858	rs10125715	T	A	0.27038	0.009979	0.0017613	1.46589e-08	330069	-4.732	2.229e-06
7	44967733	rs6463253	T	C	0.79364	0.0099359	0.0017538	1.46893e-08	330069	0.925	0.3549
11	46585781	rs11038919	G	A	0.16829	0.0098714	0.0017425	1.4696e-08	330069	-2.595	0.009467
2	76300206	rs6723128	T	G	0.21139	0.0099307	0.0017533	1.47911e-08	330069	0.173	0.8626
7	44958816	rs11762866	C	T	0.79508	0.0098941	0.001747	1.48491e-08	330069	0.89	0.3735
2	76300757	rs13409722	T	G	0.21137	0.0099293	0.0017532	1.48491e-08	330069	0.182	0.8555
5	139584275	rs397463	G	C	0.5445	0.0098978	0.0017477	1.48559e-08	330069	5.795	6.846e-09
5	112206416	rs410701	A	G	0.53394	-0.0099254	0.0017528	1.49279e-08	330069	0.658	0.5108
2	59979717	rs57270700	C	A	0.19156	0.0099005	0.0017486	1.4983e-08	330069	-2.469	0.01354
2	162887969	rs2284872	A	G	0.30936	-0.0098863	0.0017464	1.50522e-08	330069	7.019	2.236e-12
5	112183157	rs2546112	G	A	0.52226	-0.0099275	0.0017538	1.50973e-08	330069	1.108	0.2678
2	76299458	rs13405742	C	G	0.21175	0.0099327	0.001755	1.51705e-08	330069	0.163	0.8705
12	112126065	rs649406	C	T	0.18497	-0.010215	0.0018049	1.5188e-08	330069	-3.409	0.0006512
2	76300145	rs6751236	C	A	0.21175	0.009932	0.001755	1.5209e-08	330069	0.145	0.8844
12	49430094	rs10875915	T	C	0.38902	0.0098649	0.0017432	1.52195e-08	330069	6.106	1.019e-09
2	175117192	rs6746204	A	G	0.19663	0.0097491	0.001723	1.53109e-08	330069	-1.049	0.2944
12	112157262	rs688920	T	C	0.19208	-0.010483	0.0018529	1.53922e-08	330069	-3.295	0.0009851
2	59973741	rs11679028	G	A	0.18902	0.0098293	0.0017377	1.54703e-08	330069	-2.261	0.02375
11	46578400	rs12573978	G	A	0.16917	0.0098673	0.0017445	1.54917e-08	330069	-2.639	0.008307
11	46589107	rs112705011	T	C	0.16581	0.0097869	0.0017303	1.54917e-08	330069	-2.479	0.01318
2	59978857	rs113166253	C	T	0.19136	0.0098889	0.0017485	1.55489e-08	330069	-2.408	0.01603
10	63663562	rs72833334	G	A	0.35662	0.0098144	0.0017354	1.55704e-08	330069	-1.35	0.1771
11	46624218	rs75966121	G	T	0.17031	0.0098501	0.0017422	1.57217e-08	330069	-3.038	0.00238
2	76353563	rs34205641	A	T	0.20186	0.0097752	0.0017291	1.57507e-08	330069	0.088	0.9297
2	76403648	rs13035134	C	T	0.20279	0.0097728	0.0017287	1.57543e-08	330069	-0.143	0.8866
11	46570286	rs57535407	C	T	0.16923	0.0098613	0.0017444	1.57761e-08	330069	-2.667	0.007648
12	112164622	rs594570	G	A	0.19219	-0.010475	0.001853	1.5787e-08	330069	-3.309	0.0009356
12	112169652	rs668774	C	G	0.1921	-0.010473	0.0018527	1.57906e-08	330069	-3.335	0.0008518
18	34723643	rs323328	A	C	0.35298	-0.0099259	0.001756	1.58234e-08	330069	0.71	0.478
11	46406767	rs2067482	A	G	0.16558	0.0097765	0.0017297	1.58562e-08	330069	-2.758	0.005809
2	174933420	rs11688834	T	C	0.27532	0.0098336	0.0017399	1.58818e-08	330069	-1.694	0.09031
10	63663741	rs956002	C	T	0.35686	0.0098074	0.0017355	1.59514e-08	330069	-1.37	0.1707
13	58342467	rs6561942	T	G	0.45181	-0.0098503	0.0017433	1.60177e-08	330069	3.25	0.001152
2	76354035	rs35328078	C	T	0.20191	0.0097706	0.0017292	1.60177e-08	330069	0.49	0.6244
2	162891279	rs2111850	C	T	0.31341	-0.0098997	0.0017522	1.60583e-08	330069	6.892	5.513e-12
7	44968089	rs7779325	G	C	0.7935	0.0099086	0.0017539	1.61027e-08	330069	0.925	0.3549
2	162797621	rs6432706	T	C	0.28996	-0.0098621	0.0017461	1.62293e-08	330069	6.356	2.074e-10
18	34710368	rs323304	G	A	0.35337	-0.0099245	0.0017571	1.6233e-08	330069	0.657	0.5112
18	34706871	rs323302	C	T	0.3534	-0.0099241	0.0017571	1.62443e-08	330069	0.675	0.4995
2	59971668	rs57910953	G	A	0.18639	0.0097651	0.0017295	1.64059e-08	330069	-2.159	0.03086
11	46573776	rs12576317	A	G	0.16617	0.0097729	0.0017309	1.64172e-08	330069	-2.64	0.008299
18	34620011	rs322655	T	C	0.64674	0.0099211	0.0017572	1.64324e-08	330069	-0.615	0.5387
7	44966771	rs7797034	T	C	0.79361	0.0099005	0.0017538	1.65082e-08	330069	0.897	0.3695
5	139698143	rs6580516	T	G	0.53575	0.0098446	0.001744	1.6531e-08	330069	5.618	1.927e-08
12	112239872	rs10774638	C	T	0.19157	-0.010443	0.0018501	1.65615e-08	330069	-3.444	0.0005733
1	97283538	rs61786416	G	A	0.097472	0.0098016	0.0017365	1.65806e-08	330069	-0.764	0.4446
11	46578601	rs61882748	G	C	0.17082	0.0098946	0.001753	1.65997e-08	330069	-2.622	0.008736
11	45119847	rs11606697	G	A	0.26885	-0.0099424	0.0017616	1.66303e-08	330069	-0.676	0.4993
4	152749595	rs1385253	C	T	0.77763	-0.0098623	0.0017475	1.66725e-08	330069	3.403	0.000667
2	59970064	rs68127723	C	T	0.18664	0.0097701	0.0017312	1.6684e-08	330069	-2.156	0.03107
12	112183574	rs11066018	C	T	0.1896	-0.010346	0.0018334	1.67225e-08	330069	-3.299	0.0009699
12	90559122	rs141885450	C	T	0.0031914	0.0094375	0.0016726	1.67842e-08	330069	NA	NA
5	111134058	rs77917390	A	T	0.094145	-0.0095862	0.001699	1.67958e-08	330069	0.102	0.9186
13	58462704	rs9527726	G	A	0.4289	-0.0098282	0.0017419	1.68151e-08	330069	2.49	0.01277
2	175091630	rs6741467	A	C	0.32252	0.0099521	0.0017642	1.69122e-08	330069	-2.24	0.02512
12	112206895	rs4767939	G	A	0.18511	-0.010196	0.0018075	1.69239e-08	330069	-3.382	0.0007208
18	34692374	rs2654543	G	A	0.3533	-0.0099112	0.001757	1.69278e-08	330069	0.534	0.5936
5	139558584	rs11748023	T	C	0.54352	0.0098607	0.0017481	1.69473e-08	330069	5.795	6.833e-09
5	112203564	rs7213	A	T	0.65893	-0.0099294	0.0017603	1.69473e-08	330069	-0.683	0.4944
2	174931752	rs9287971	A	G	0.32724	0.0099439	0.001763	1.69824e-08	330069	-2.074	0.03808
11	46553399	rs112419908	A	G	0.16566	0.0097619	0.0017308	1.70216e-08	330069	-2.615	0.008925
5	139547971	rs7726176	A	T	0.54652	0.0098605	0.0017485	1.70844e-08	330069	5.864	4.52e-09
11	46660550	rs7126316	A	T	0.1669	0.0097611	0.0017311	1.71475e-08	330069	-2.663	0.007746
2	56452097	rs6545560	G	A	0.25038	-0.0097338	0.0017265	1.72385e-08	330069	4.724	2.31e-06
2	76268843	rs2010897	A	T	0.21141	0.0098836	0.0017531	1.72465e-08	330069	0.136	0.8918
5	112188437	rs373059	A	G	0.53071	-0.0098762	0.0017519	1.72624e-08	330069	0.824	0.41
5	112215156	rs514763	T	C	0.33056	0.0099216	0.0017601	1.73221e-08	330069	0.582	0.5609
12	112164715	rs634389	G	C	0.18562	-0.010198	0.0018093	1.7362e-08	330069	-3.344	0.0008266
12	112163646	rs847898	C	T	0.18562	-0.010198	0.0018093	1.7366e-08	330069	-3.343	0.0008273
11	46590943	rs79445785	T	C	0.1658	0.0097528	0.0017303	1.7382e-08	330069	-2.497	0.01253
11	46421158	rs7946705	A	G	0.1687	0.0098203	0.0017425	1.74301e-08	330069	-2.661	0.007801
18	34565391	rs7235932	C	A	0.64685	0.0099029	0.0017572	1.74663e-08	330069	-0.731	0.4646
2	162804678	rs1913808	A	G	0.29058	-0.0098467	0.0017474	1.75267e-08	330069	6.429	1.285e-10
12	112166696	rs624716	G	A	0.18565	-0.010195	0.0018093	1.75348e-08	330069	-3.358	0.0007847
11	46710829	rs79443985	C	T	0.15567	0.0097595	0.001732	1.7555e-08	330069	-2.844	0.00445
11	46438715	rs61882691	A	C	0.16571	0.0097477	0.0017301	1.75995e-08	330069	-2.696	0.007026
2	175125075	rs73037893	C	T	0.19499	0.0097078	0.0017231	1.76157e-08	330069	-1.015	0.3102
2	175090564	rs11691915	T	C	0.32261	0.0099387	0.0017642	1.76848e-08	330069	-2.225	0.02611
2	175123976	rs73037890	C	T	0.19555	0.0097111	0.001724	1.77215e-08	330069	-0.945	0.3445
11	45119181	rs747614	C	A	0.26805	-0.0099222	0.0017616	1.77623e-08	330069	-0.59	0.5555
11	46483948	rs61882712	C	T	0.1658	0.0097438	0.0017301	1.78443e-08	330069	-2.648	0.00809
15	47896550	rs16959783	T	C	0.22828	0.0097198	0.0017264	1.80177e-08	330069	-2.838	0.00454
11	45119841	rs11604720	C	T	0.26885	-0.0099179	0.0017616	1.8026e-08	330069	-0.66	0.5095
13	58475833	rs1953283	A	C	0.44932	-0.0098185	0.001744	1.80551e-08	330069	2.474	0.01336
11	46524472	rs10838602	A	G	0.16918	0.0098192	0.0017443	1.81217e-08	330069	-2.689	0.007157
2	76351418	rs11690678	T	A	0.20172	0.009732	0.0017289	1.81217e-08	330069	0.087	0.9307
1	183270738	rs12037564	A	G	0.55375	0.0097951	0.0017404	1.82264e-08	330069	-2.812	0.004931
12	112191139	rs7956676	G	A	0.19161	-0.010416	0.0018508	1.82432e-08	330069	-3.373	0.0007448
1	97099041	rs61789318	G	T	0.072732	0.0098512	0.0017504	1.826e-08	330069	-0.788	0.4309
11	46376094	rs61882682	C	A	0.16579	0.0097712	0.0017363	1.82768e-08	330069	-2.825	0.004727
2	76343260	rs10496201	G	T	0.20234	0.0097349	0.0017298	1.82894e-08	330069	0.083	0.9336
12	112418146	rs2339907	A	C	0.29815	-0.010197	0.0018123	1.83781e-08	330069	-1.181	0.2375
11	46684524	rs61884292	T	A	0.16603	0.0097356	0.0017306	1.85012e-08	330069	-2.671	0.007563
12	112211833	rs2238151	C	T	0.34803	-0.010178	0.0018093	1.85567e-08	330069	-1.547	0.1218
11	46427855	rs111449880	A	G	0.16932	0.0098147	0.0017449	1.85994e-08	330069	-2.693	0.007075
11	46443275	rs61882701	A	G	0.16912	0.00981	0.0017442	1.8638e-08	330069	-2.71	0.006724
11	46442526	rs12283172	T	C	0.16912	0.0098098	0.0017442	1.86466e-08	330069	-2.735	0.006235
11	46524389	rs12576359	G	T	0.16924	0.0098097	0.0017442	1.86681e-08	330069	-2.678	0.007403
6	128327031	rs45582334	G	A	0.30791	-0.0097744	0.0017383	1.87845e-08	330069	4.411	1.027e-05
11	46702691	rs4319473	A	G	0.15512	0.009733	0.001731	1.88148e-08	330069	-2.899	0.00374
2	162802795	rs13430823	C	T	0.29088	-0.0098272	0.0017478	1.88278e-08	330069	6.337	2.341e-10
11	46513249	rs7112229	T	C	0.16922	0.0098067	0.0017442	1.88278e-08	330069	-2.673	0.007523
11	46376953	rs59319338	T	C	0.16543	0.0097622	0.0017365	1.89017e-08	330069	-2.726	0.006413
11	46450821	rs61882702	A	G	0.16611	0.0097299	0.0017308	1.89365e-08	330069	-2.632	0.008483
11	46491159	rs12574250	A	G	0.16594	0.0097282	0.0017308	1.90239e-08	330069	-2.691	0.00712
11	46711854	rs7926389	G	A	0.16634	0.010124	0.0018012	1.90283e-08	330069	-2.853	0.004335
5	139694938	rs4912710	G	A	0.54041	0.0098079	0.0017451	1.90678e-08	330069	5.486	4.122e-08
17	43974147	rs3785878	T	C	0.21636	-0.0098032	0.0017443	1.9081e-08	330069	5.886	3.955e-09
11	46704439	rs12574259	G	A	0.15543	0.0097352	0.0017322	1.90897e-08	330069	-2.892	0.00383
12	112233018	rs10744777	C	T	0.34911	-0.01017	0.0018099	1.91999e-08	330069	-1.549	0.1214
10	63670685	rs72833340	G	A	0.34746	0.0097469	0.0017347	1.92353e-08	330069	-1.328	0.1841
5	139545748	rs4463213	A	G	0.54587	0.0098259	0.0017489	1.93108e-08	330069	5.887	3.934e-09
13	58521633	rs980610	G	A	0.44844	-0.0097981	0.001744	1.93152e-08	330069	2.404	0.01623
2	175140109	rs6710256	G	A	0.19505	0.0096855	0.001724	1.93241e-08	330069	-1.107	0.2681
11	46484685	rs1472001	A	G	0.16949	0.0098048	0.0017453	1.93419e-08	330069	-2.678	0.007403
10	63674961	rs17214506	G	C	0.34311	0.0097449	0.0017346	1.93419e-08	330069	-1.371	0.1704
5	112224952	rs456313	C	G	0.33847	0.0098702	0.0017572	1.94626e-08	330069	0.701	0.4832
11	46684677	rs4423142	G	T	0.17101	0.0098454	0.0017528	1.9467e-08	330069	-2.644	0.008198
11	46668395	rs4307676	A	G	0.16611	0.0097191	0.0017307	1.95839e-08	330069	-2.647	0.008125
2	162803883	rs13421039	T	C	0.29067	-0.009812	0.0017475	1.96743e-08	330069	6.428	1.294e-10
11	46457259	rs75748389	G	C	0.16878	0.0097797	0.001742	1.97834e-08	330069	-2.646	0.008137
5	112227939	rs712666	C	T	0.35015	0.0098372	0.0017524	1.9829e-08	330069	0.426	0.67
12	112249884	rs6489793	G	T	0.19139	-0.010372	0.0018478	1.98564e-08	330069	-3.368	0.0007577
13	58523926	rs9563562	C	T	0.4485	-0.0097898	0.0017441	1.98793e-08	330069	2.389	0.0169
11	46484254	rs7930103	T	C	0.16949	0.0097955	0.0017453	1.9948e-08	330069	-2.678	0.007411
17	50294365	rs1503043	G	C	0.33565	0.0097248	0.0017328	2.00078e-08	330069	-1.174	0.2402
5	112227799	rs712665	G	A	0.35015	0.0098319	0.0017524	2.01697e-08	330069	0.366	0.7143
12	112136583	rs666951	A	C	0.18536	-0.010148	0.0018089	2.02255e-08	330069	-3.278	0.001046
11	46456344	rs2291487	T	C	0.166	0.0097092	0.0017307	2.02488e-08	330069	-2.649	0.008074
13	58595043	rs1581853	A	G	0.42371	-0.0097807	0.0017434	2.02488e-08	330069	1.404	0.1603
11	46682217	rs55896955	G	C	0.16604	0.0097084	0.0017307	2.03236e-08	330069	-2.65	0.008044
13	58599245	rs7988877	A	T	0.42391	-0.0097783	0.0017434	2.03986e-08	330069	1.381	0.1672
2	175140605	rs11675378	C	T	0.19513	0.0096681	0.001724	2.04927e-08	330069	-1.103	0.27
17	50288321	rs28727342	T	G	0.33562	0.0097187	0.001733	2.04975e-08	330069	-1.245	0.2133
13	58332464	rs4561330	G	A	0.45901	-0.0097625	0.0017409	2.05022e-08	330069	3.226	0.001257
12	112168050	rs640783	G	A	0.18445	-0.01011	0.0018029	2.05494e-08	330069	-3.412	0.0006452
5	112218476	rs1093611	T	A	0.36512	0.009864	0.0017592	2.0611e-08	330069	0.894	0.3713
13	58496024	rs9537865	T	C	0.44859	-0.0097773	0.001744	2.06824e-08	330069	2.335	0.01953
5	112226655	rs818425	T	C	0.33843	0.0098516	0.0017572	2.06871e-08	330069	0.7	0.4837
11	46666271	rs61884273	G	T	0.16604	0.0097027	0.0017308	2.07157e-08	330069	-2.659	0.007836
11	46666664	rs61884274	G	A	0.16604	0.009702	0.0017308	2.07635e-08	330069	-2.653	0.007982
12	112176107	rs669148	G	A	0.1856	-0.010142	0.0018092	2.07778e-08	330069	-3.343	0.0008303
11	46481259	rs80031726	C	T	0.16707	0.0097247	0.0017349	2.07874e-08	330069	-2.619	0.008807
12	112050445	rs76741465	C	G	0.17346	-0.0097965	0.0017477	2.0797e-08	330069	-3.091	0.001996
2	175131798	rs74718197	C	T	0.19425	0.0096551	0.0017226	2.08641e-08	330069	-1.143	0.2531
11	46462786	rs61882706	A	G	0.1661	0.0096968	0.0017305	2.10378e-08	330069	-2.618	0.00885
13	58591107	rs9537916	A	G	0.42398	-0.0097693	0.0017435	2.10378e-08	330069	1.356	0.1752
2	59977067	rs60358748	G	T	0.1863	0.0096886	0.0017294	2.11787e-08	330069	-2.294	0.02179
11	46641654	rs79317378	C	T	0.16884	0.0097596	0.0017422	2.12227e-08	330069	-2.638	0.008344
12	112180177	rs7962138	G	A	0.18555	-0.010135	0.0018093	2.12667e-08	330069	-3.317	0.0009093
2	175133282	rs11687678	A	C	0.19447	0.0096513	0.0017231	2.13157e-08	330069	-1.158	0.2469
5	112200098	rs351767	G	A	0.66156	-0.0098441	0.0017576	2.13403e-08	330069	-0.588	0.5563
11	46634465	rs6485685	A	G	0.16941	0.0097712	0.0017446	2.13501e-08	330069	-2.679	0.007378
13	58497931	rs9569779	G	A	0.44853	-0.0097677	0.001744	2.13599e-08	330069	2.337	0.01942
2	175133946	rs9646790	A	T	0.19437	0.009649	0.0017229	2.14141e-08	330069	-1.127	0.2597
11	46468859	rs2864072	C	A	0.17092	0.0098147	0.0017527	2.14684e-08	330069	-2.62	0.008783
11	46544072	rs12272795	G	A	0.16921	0.0097555	0.0017421	2.14783e-08	330069	-2.52	0.01174
11	46655961	rs7128092	A	T	0.16605	0.0096908	0.0017308	2.15774e-08	330069	-2.684	0.007264
11	46473942	rs61882710	A	G	0.16602	0.0096863	0.0017306	2.17972e-08	330069	-2.642	0.008242
2	175143352	rs74723458	A	G	0.19432	0.0096434	0.001723	2.18223e-08	330069	-1.046	0.2956
12	116771071	rs58984824	A	C	0.15372	0.0096194	0.0017187	2.18223e-08	330069	-0.286	0.7745
2	104319974	rs921966	C	T	0.6138	0.0097233	0.0017373	2.18374e-08	330069	0.961	0.3363
5	112201094	rs495794	G	A	0.66	-0.0098348	0.0017572	2.18374e-08	330069	-0.685	0.4935
11	46622392	rs7125907	T	C	0.16883	0.0097493	0.0017421	2.18978e-08	330069	-2.686	0.007223
5	112237724	rs153548	C	A	0.35106	0.0098044	0.0017521	2.19887e-08	330069	0.609	0.5427
16	56215936	rs1734197	T	C	0.55076	0.0097447	0.0017415	2.20039e-08	330069	-3.893	9.91e-05
16	56217006	rs1190745	G	T	0.55075	0.0097436	0.0017415	2.20851e-08	330069	-3.899	9.67e-05
11	46607954	rs12295266	T	A	0.16886	0.0097458	0.001742	2.21462e-08	330069	-2.682	0.007326
11	46631299	rs61884262	A	G	0.16959	0.0097654	0.0017459	2.22741e-08	330069	-2.569	0.01021
2	175144371	rs9646791	A	C	0.19418	0.0096355	0.0017227	2.23049e-08	330069	-1.135	0.2563
11	46634963	rs55657382	A	T	0.16931	0.0097572	0.0017445	2.23306e-08	330069	-2.656	0.007901
5	112238039	rs153546	C	A	0.33748	0.0098035	0.001753	2.23924e-08	330069	0.846	0.3976
11	46723516	rs57739486	T	C	0.15547	0.009685	0.0017318	2.2413e-08	330069	-2.892	0.003832
12	112164620	rs634819	A	G	0.18445	-0.010081	0.0018028	2.24543e-08	330069	-3.385	0.0007123
13	58296205	rs4375560	C	T	0.46052	-0.0097398	0.0017417	2.24647e-08	330069	2.937	0.003316
2	104083756	rs2569963	T	C	0.6167	0.0097251	0.0017392	2.24905e-08	330069	1.097	0.2728
12	112183490	rs4767694	A	G	0.18578	-0.010117	0.0018092	2.25113e-08	330069	-3.304	0.0009546
11	45120027	rs56989510	C	T	0.26781	-0.0098479	0.0017614	2.2584e-08	330069	-0.631	0.5281
2	56466964	rs17047680	A	G	0.24988	-0.0096918	0.0017335	2.25892e-08	330069	4.858	1.187e-06
2	162891075	rs2160927	T	C	0.30963	-0.0097643	0.0017464	2.25944e-08	330069	6.917	4.621e-12
11	46724068	rs12574918	C	G	0.15547	0.0096826	0.0017318	2.26048e-08	330069	-2.887	0.003889
2	76354679	rs12997508	C	G	0.20038	0.0096701	0.0017298	2.26673e-08	330069	0.188	0.8507
13	58524895	rs2217928	C	T	0.44847	-0.0097491	0.001744	2.273e-08	330069	2.391	0.01679
2	162890217	rs7608798	A	G	0.31187	-0.0097741	0.0017485	2.27457e-08	330069	6.919	4.543e-12
11	46728954	rs11038974	T	G	0.15822	0.0097506	0.0017444	2.27719e-08	330069	-2.896	0.003779
2	162868858	rs1014444	G	A	0.33556	-0.009816	0.0017562	2.27982e-08	330069	6.096	1.085e-09
11	46728952	rs11038973	C	G	0.15825	0.0097489	0.0017444	2.28929e-08	330069	-2.9	0.003728
13	58347532	rs7992991	G	A	0.45907	-0.0097292	0.0017409	2.29087e-08	330069	3.212	0.001317
1	97202841	rs66705010	A	T	0.10144	0.0098305	0.0017591	2.29456e-08	330069	-0.682	0.4954
13	58509432	rs7997285	T	C	0.44846	-0.009746	0.001744	2.29509e-08	330069	2.428	0.01517
13	58511363	rs9537872	G	A	0.44847	-0.0097447	0.001744	2.30515e-08	330069	2.378	0.0174
6	128328289	rs13218577	C	T	0.30818	-0.0097126	0.0017385	2.3142e-08	330069	4.403	1.066e-05
11	46660623	rs7126343	C	T	0.16826	0.0097133	0.0017387	2.3206e-08	330069	-2.636	0.00838
2	175143040	rs112586500	T	C	0.19424	0.0096234	0.0017227	2.32381e-08	330069	-1.107	0.2683
9	76881401	rs670010	A	G	0.76656	0.0096524	0.001728	2.32541e-08	330069	-2.793	0.005221
11	46935185	rs9667108	C	G	0.094747	0.010319	0.0018474	2.33131e-08	330069	-3.935	8.322e-05
2	76430941	rs1916870	G	T	0.19082	0.009622	0.0017228	2.33776e-08	330069	-0.261	0.7943
7	109777798	rs80054135	T	A	0.054328	-0.009888	0.0017704	2.33884e-08	330069	1.563	0.118
2	104160497	rs60705333	A	G	0.4557	-0.0097329	0.0017427	2.34099e-08	330069	-1.884	0.05959
3	23240658	rs1032500	T	C	0.32548	0.0097969	0.0017543	2.34369e-08	330069	-1.553	0.1203
2	104105385	rs62151026	G	C	0.38554	-0.0097048	0.0017378	2.34369e-08	330069	-1.158	0.2468
12	49390677	rs10783299	C	T	0.39312	0.0097564	0.0017471	2.34693e-08	330069	6.303	2.911e-10
11	46652582	rs60932698	G	A	0.16884	0.0097281	0.0017421	2.35126e-08	330069	-2.673	0.007507
11	46627803	rs55661562	C	A	0.16613	0.0096639	0.0017308	2.35831e-08	330069	-2.631	0.008519
11	46644143	rs12292425	G	T	0.1712	0.0097938	0.0017541	2.35885e-08	330069	-2.616	0.008893
5	139700608	rs11168018	A	T	0.53875	0.009737	0.0017441	2.36865e-08	330069	5.64	1.7e-08
11	46596674	rs7481312	T	C	0.171	0.0097862	0.001753	2.37301e-08	330069	-2.612	0.008993
11	46730043	rs79175663	T	C	0.15553	0.0096664	0.0017318	2.38287e-08	330069	-2.905	0.003668
11	46654404	rs61884271	C	T	0.16628	0.0096604	0.0017308	2.38891e-08	330069	-2.562	0.01039
4	152768951	rs361212	C	T	0.74039	-0.0098301	0.0017613	2.39221e-08	330069	1.904	0.05693
11	46611239	rs61882757	A	G	0.16881	0.0097195	0.0017418	2.40381e-08	330069	-2.682	0.007316
11	46640503	rs7484002	G	A	0.17099	0.0097819	0.001753	2.40602e-08	330069	-2.614	0.008951
2	104348172	rs6543231	C	G	0.61449	0.0096923	0.001737	2.4088e-08	330069	1.025	0.3053
19	4080391	rs72978905	G	A	0.17828	-0.0097286	0.0017436	2.41435e-08	330069	2.583	0.009781
11	45120830	rs7935386	C	G	0.26789	-0.0098268	0.0017613	2.41657e-08	330069	-0.684	0.4937
13	58462914	rs4584714	A	G	0.56084	0.0097464	0.0017469	2.41769e-08	330069	-2.44	0.01469
11	46729115	rs61884301	T	G	0.15551	0.0096607	0.0017317	2.42549e-08	330069	-2.9	0.00373
17	50296779	rs12601661	C	A	0.33587	0.0096661	0.0017328	2.42996e-08	330069	-1.176	0.2398
11	46610283	rs61882756	T	C	0.166	0.0096537	0.0017307	2.43445e-08	330069	-2.728	0.006375
4	152775454	rs189679	G	C	0.78832	-0.0097038	0.0017397	2.43501e-08	330069	1.316	0.188
2	162813807	rs10221808	G	A	0.28789	-0.0097241	0.0017436	2.44737e-08	330069	6.389	1.675e-10
2	56451039	rs1549028	C	G	0.24965	-0.0096322	0.0017271	2.44906e-08	330069	4.672	2.986e-06
2	104149470	rs1597745	G	A	0.38549	-0.0096882	0.0017375	2.46263e-08	330069	-1.123	0.2616
2	104149169	rs12466519	T	C	0.4414	-0.0097138	0.0017421	2.4649e-08	330069	-1.052	0.2928
11	46368559	rs61882679	T	G	0.08296	0.0096166	0.0017247	2.46774e-08	330069	-3.847	0.0001197
13	58308216	rs4132014	C	G	0.45688	-0.0097169	0.0017428	2.46888e-08	330069	2.952	0.003157
12	49422094	rs10875914	G	A	0.40503	0.009737	0.0017468	2.48771e-08	330069	6.59	4.389e-11
11	46538988	rs61882720	A	C	0.16627	0.0096465	0.0017308	2.49919e-08	330069	-2.608	0.009111
2	104319048	rs12712178	G	T	0.61381	0.0096817	0.0017372	2.50496e-08	330069	0.98	0.3269
5	112188456	rs454968	C	T	0.63982	-0.0097838	0.0017557	2.51073e-08	330069	-0.256	0.7983
13	58530277	rs1926544	C	A	0.44844	-0.009719	0.0017441	2.51189e-08	330069	2.406	0.01615
2	175145516	rs11676222	A	G	0.19435	0.0096011	0.001723	2.51478e-08	330069	-1.124	0.2612
12	49439376	rs10783301	G	A	0.39139	0.0097217	0.0017451	2.5363e-08	330069	6.205	5.471e-10
12	49444545	rs2241726	A	G	0.38959	0.00971	0.0017431	2.54156e-08	330069	6.263	3.782e-10
11	46612332	rs73449983	G	A	0.17104	0.0097646	0.0017529	2.54331e-08	330069	-2.619	0.008823
2	104151304	rs7600378	A	G	0.44146	-0.0097003	0.0017422	2.58048e-08	330069	-1.068	0.2855
2	76245656	rs11901961	A	C	0.2108	0.0097655	0.0017542	2.59358e-08	330069	0.076	0.9398
2	104127109	rs1451981	T	C	0.4413	-0.0096972	0.0017419	2.59418e-08	330069	-1.093	0.2745
2	76282306	rs6713168	A	G	0.21065	0.0097603	0.0017534	2.60196e-08	330069	0.228	0.82
2	104113377	rs17336391	T	A	0.4414	-0.0096975	0.0017422	2.60615e-08	330069	-1.15	0.2501
19	4080044	rs56267960	G	C	0.17805	-0.0097048	0.0017438	2.61698e-08	330069	2.553	0.01069
2	59970477	rs17656897	C	T	0.18326	0.0095765	0.0017208	2.6212e-08	330069	-2.165	0.03042
2	104122137	rs7596779	T	C	0.44127	-0.0096951	0.0017421	2.6218e-08	330069	-1.086	0.2774
11	46548094	rs7932866	G	A	0.16882	0.0096941	0.0017421	2.63027e-08	330069	-2.623	0.008709
1	97298667	rs61786423	G	A	0.10778	0.0096612	0.0017363	2.63694e-08	330069	-0.138	0.8904
16	56203116	rs1209158	T	A	0.55061	0.0096897	0.0017415	2.63876e-08	330069	-3.848	0.000119
16	56203469	rs1190751	A	G	0.55061	0.0096894	0.0017415	2.64119e-08	330069	-3.844	0.0001208
1	97230156	rs61786398	G	A	0.10092	0.0097875	0.0017594	2.65522e-08	330069	-0.528	0.5978
2	104125850	rs7605491	C	T	0.44128	-0.0096889	0.0017421	2.67547e-08	330069	-1.074	0.2827
1	50416830	rs11205668	T	C	0.55105	0.0097948	0.0017612	2.67855e-08	330069	-0.672	0.5014
13	58535792	rs9537878	A	G	0.44838	-0.0096995	0.0017441	2.67979e-08	330069	2.363	0.01814
7	123689194	rs7783359	A	T	0.34948	0.009673	0.0017396	2.69153e-08	330069	1.479	0.139
11	46393574	rs3740977	C	T	0.16688	0.0096514	0.0017358	2.69401e-08	330069	-2.808	0.004979
13	58533627	rs7326330	C	T	0.44839	-0.0096976	0.0017441	2.69588e-08	330069	2.366	0.01798
13	58541519	rs9537883	T	G	0.44835	-0.0096959	0.0017441	2.71206e-08	330069	2.343	0.01912
1	50470847	rs11205672	A	G	0.55115	0.0097911	0.0017613	2.71331e-08	330069	-0.684	0.4942
1	50458269	rs4313442	A	T	0.55114	0.0097898	0.0017612	2.7227e-08	330069	-0.69	0.4902
12	112060842	rs11613441	C	T	0.17314	-0.0097149	0.0017479	2.73149e-08	330069	-3.277	0.00105
11	46934369	rs7120113	T	C	0.094611	0.010268	0.0018475	2.73275e-08	330069	-3.895	9.821e-05
16	56170484	rs987164	A	G	0.44936	-0.0096778	0.0017415	2.7441e-08	330069	3.894	9.868e-05
1	50443589	rs9659092	G	A	0.54936	0.0098145	0.0017661	2.7441e-08	330069	-0.711	0.4768
1	50484613	rs12758298	A	C	0.55115	0.0097868	0.0017612	2.75043e-08	330069	-0.658	0.5105
2	104124252	rs17414675	G	A	0.44128	-0.0096793	0.0017421	2.76121e-08	330069	-1.066	0.2865
2	104371856	rs12615038	G	T	0.61652	0.0096478	0.0017365	2.76567e-08	330069	1.114	0.2653
12	49408440	rs2117029	T	A	0.39269	0.009708	0.0017475	2.77332e-08	330069	6.309	2.817e-10
6	128322437	rs34601789	C	T	0.31628	-0.0096591	0.0017388	2.77779e-08	330069	3.97	7.184e-05
1	50469729	rs12039592	T	G	0.55116	0.0097835	0.0017612	2.77971e-08	330069	-0.694	0.4875
2	162885110	rs2268889	T	C	0.32228	-0.0097059	0.0017477	2.80092e-08	330069	6.986	2.836e-12
2	76245774	rs17749719	C	A	0.20194	0.009604	0.0017294	2.80221e-08	330069	0.117	0.9071
1	97291311	rs61786421	A	T	0.10691	0.0096206	0.0017324	2.80608e-08	330069	-0.071	0.9436
2	76251349	rs13396626	T	C	0.21074	0.0097338	0.0017532	2.82618e-08	330069	0.096	0.9236
7	44947489	rs2079328	T	C	0.79485	0.0098292	0.0017706	2.83727e-08	330069	0.417	0.6765
16	56178907	rs1450732	G	A	0.44933	-0.0096671	0.0017416	2.84512e-08	330069	3.842	0.0001222
11	46390680	rs61882686	A	C	0.082773	0.0095717	0.0017244	2.84708e-08	330069	-3.88	0.0001045
2	76267139	rs11897811	T	C	0.2117	0.0097532	0.0017572	2.85299e-08	330069	0.076	0.9395
10	63674934	rs58936043	A	G	0.3471	0.0096269	0.0017345	2.85627e-08	330069	-1.324	0.1857
5	112205207	rs439456	C	G	0.65024	-0.0097599	0.0017586	2.86352e-08	330069	-0.261	0.7941
1	50514372	rs4454586	G	A	0.55221	0.0097757	0.0017615	2.8655e-08	330069	-0.742	0.4579
2	104352160	rs10196462	C	T	0.61616	0.0096382	0.0017369	2.87144e-08	330069	0.967	0.3337
13	58654345	rs1536384	C	T	0.44536	-0.0096761	0.0017437	2.87343e-08	330069	2.546	0.01089
1	50420315	rs12725998	G	A	0.55108	0.0097717	0.0017613	2.88868e-08	330069	-0.688	0.4913
5	112242968	rs469727	T	C	0.34382	0.0096752	0.001744	2.89668e-08	330069	0.453	0.6502
1	50416930	rs12047155	G	A	0.55108	0.0097708	0.0017613	2.89734e-08	330069	-0.679	0.4969
13	58674683	rs1470456	G	A	0.44523	-0.0096701	0.0017433	2.91005e-08	330069	2.589	0.009626
2	76281363	rs13015060	A	G	0.20162	0.0095906	0.001729	2.91273e-08	330069	0.255	0.7988
2	76252953	rs72820785	C	G	0.20187	0.0095897	0.0017291	2.92483e-08	330069	0.176	0.8605
5	112231829	rs469663	G	A	0.35062	0.0097119	0.0017517	2.95325e-08	330069	0.416	0.6774
7	123698125	rs12113578	C	G	0.34865	0.0096449	0.0017397	2.96006e-08	330069	1.278	0.2012
1	97293023	rs12024594	G	A	0.10687	0.0096023	0.0017321	2.96415e-08	330069	-0.111	0.9113
6	128314604	rs11154433	C	A	0.31631	-0.0096509	0.0017409	2.96551e-08	330069	4.129	3.648e-05
2	56464559	rs985792	G	T	0.25234	-0.0096212	0.0017356	2.96961e-08	330069	4.657	3.214e-06
5	112244010	rs468101	G	A	0.34383	0.0096661	0.0017439	2.97715e-08	330069	0.475	0.6349
2	76260305	rs2017612	A	C	0.20192	0.0095846	0.0017292	2.98057e-08	330069	0.159	0.8735
7	123699501	rs17628827	A	T	0.34887	0.0096416	0.0017396	2.98401e-08	330069	1.529	0.1262
5	112243527	rs698405	T	C	0.34383	0.0096652	0.0017439	2.98745e-08	330069	0.441	0.6593
17	50291181	rs9903845	A	C	0.32191	0.0096024	0.0017329	3.00538e-08	330069	-0.869	0.3849
5	112257591	rs151980	G	C	0.4523	0.0096693	0.001745	3.00608e-08	330069	-0.51	0.6099
2	104089243	rs266050	C	T	0.61612	0.0096372	0.0017393	3.0137e-08	330069	1.223	0.2213
12	112190438	rs6490294	A	C	0.19062	-0.010257	0.0018514	3.02273e-08	330069	-3.356	0.0007919
7	123699044	rs62473393	A	C	0.34888	0.0096371	0.0017396	3.0311e-08	330069	1.533	0.1254
2	104157011	rs11123962	G	T	0.43761	-0.0096455	0.0017414	3.04439e-08	330069	-1.165	0.2438
2	162894766	rs10930040	G	A	0.31147	-0.009672	0.0017463	3.05e-08	330069	6.986	2.822e-12
2	76246432	rs17012055	G	A	0.21105	0.0097172	0.0017544	3.05141e-08	330069	0.095	0.9243
13	58675865	rs9527759	C	T	0.44527	-0.0096548	0.0017433	3.05914e-08	330069	2.567	0.01025
13	58652225	rs9563573	T	C	0.44566	-0.0096566	0.0017438	3.06832e-08	330069	2.538	0.01114
7	123698772	rs10953990	C	A	0.34888	0.0096334	0.0017397	3.07044e-08	330069	1.485	0.1375
7	123687161	rs61427468	T	A	0.34939	0.0096329	0.0017396	3.07044e-08	330069	1.471	0.1414
1	50500185	rs9660278	T	C	0.55208	0.0097538	0.0017616	3.07893e-08	330069	-0.709	0.478
7	123689288	rs73720344	A	C	0.34888	0.0096301	0.0017396	3.10242e-08	330069	1.501	0.1334
7	123689895	rs57191071	A	G	0.34888	0.0096296	0.0017396	3.10742e-08	330069	1.506	0.1322
2	76250415	rs34096809	G	A	0.20174	0.0095712	0.0017291	3.10957e-08	330069	0.131	0.8959
2	76286326	rs13027154	G	A	0.20196	0.0095729	0.0017295	3.11243e-08	330069	0.268	0.7887
7	123695754	rs73720349	A	G	0.34889	0.009629	0.0017397	3.11458e-08	330069	1.491	0.1359
7	123695216	rs62473388	C	T	0.34889	0.009629	0.0017397	3.11458e-08	330069	1.481	0.1387
7	123693818	rs59536422	C	T	0.34889	0.0096289	0.0017397	3.1153e-08	330069	1.506	0.1321
7	123695061	rs9649468	A	G	0.34888	0.0096289	0.0017397	3.1153e-08	330069	1.48	0.1389
1	97259129	rs6702379	T	G	0.10114	0.0097373	0.0017593	3.11889e-08	330069	-0.578	0.5632
2	76246645	rs67627854	G	T	0.21126	0.0097154	0.0017554	3.12033e-08	330069	0.091	0.9274
7	123697394	rs62473391	A	G	0.34889	0.0096283	0.0017397	3.12176e-08	330069	1.495	0.135
12	112061723	rs77684561	T	C	0.17313	-0.0096738	0.001748	3.12752e-08	330069	-3.105	0.001905
2	59975650	rs59160084	C	G	0.18598	0.0095694	0.0017293	3.13906e-08	330069	-2.272	0.0231
13	58669068	rs9537941	C	A	0.4452	-0.0096466	0.0017434	3.14557e-08	330069	2.624	0.008694
13	58691608	rs2321388	T	C	0.49811	-0.0096873	0.0017508	3.1492e-08	330069	4.02	5.828e-05
12	112151476	rs592967	T	C	0.18227	-0.0099842	0.0018046	3.15428e-08	330069	-3.477	0.0005073
2	104325425	rs13023284	C	T	0.61916	0.0096158	0.0017382	3.16665e-08	330069	1.054	0.2919
12	49402299	rs1138908	C	G	0.39279	0.0096678	0.0017477	3.17395e-08	330069	6.275	3.49e-10
1	97226675	rs2391782	G	A	0.097507	0.0096044	0.0017369	3.20996e-08	330069	-0.562	0.5741
9	86578925	rs296883	T	A	0.26458	0.0098728	0.0017855	3.21514e-08	330069	-4.794	1.634e-06
13	58545246	rs9537886	A	C	0.44829	-0.0096444	0.0017443	3.22181e-08	330069	2.356	0.01847
12	49400505	rs10875908	C	A	0.39152	0.0096498	0.0017453	3.22552e-08	330069	6.198	5.731e-10
2	76284826	rs2033996	A	T	0.21067	0.009693	0.0017534	3.23817e-08	330069	0.181	0.8561
2	104339017	rs10170621	A	T	0.61616	0.009603	0.0017371	3.23966e-08	330069	1.016	0.3094
2	76255306	rs34127116	T	C	0.20179	0.009559	0.0017292	3.2419e-08	330069	0.145	0.8849
2	76252103	rs2099784	G	A	0.21085	0.0096907	0.0017532	3.25012e-08	330069	0.084	0.9334
7	123682804	rs1468310	A	G	0.34892	0.0096119	0.0017391	3.25987e-08	330069	1.484	0.1378
2	104288396	rs264932	G	A	0.61825	0.0096023	0.0017378	3.28473e-08	330069	1.094	0.2739
7	123685724	rs763819	G	C	0.34936	0.0096118	0.0017396	3.29003e-08	330069	1.454	0.1461
2	104098057	rs1579548	A	G	0.44555	-0.0096279	0.001743	3.31894e-08	330069	-1.125	0.2606
7	123686671	rs17552799	T	C	0.34925	0.0096081	0.0017396	3.33196e-08	330069	1.458	0.1449
2	76285203	rs7590192	A	G	0.21068	0.0096841	0.0017534	3.3358e-08	330069	0.23	0.8179
2	59975400	rs11696100	G	A	0.1859	0.0095479	0.0017289	3.34657e-08	330069	-2.231	0.02566
2	76242053	rs3860465	G	C	0.20172	0.009549	0.0017292	3.34811e-08	330069	0.152	0.8788
16	56146501	rs7202017	C	A	0.45188	-0.0096156	0.0017414	3.36047e-08	330069	3.887	0.0001017
7	123684932	rs17552666	C	T	0.34943	0.0096063	0.0017398	3.36124e-08	330069	1.471	0.1412
2	76268949	rs1808872	A	G	0.21157	0.0097036	0.0017575	3.37054e-08	330069	0.134	0.893
7	123689607	rs62473384	G	A	0.34434	0.009586	0.0017364	3.38221e-08	330069	1.482	0.1383
7	123687200	rs58538704	A	C	0.34937	0.0096029	0.0017396	3.38766e-08	330069	1.483	0.1382
2	56467748	rs6759030	C	A	0.25092	-0.0095709	0.0017338	3.38922e-08	330069	4.735	2.187e-06
1	97312384	rs61786426	C	T	0.094661	0.0096303	0.0017447	3.39703e-08	330069	-0.508	0.6112
2	59959846	rs7566342	C	T	0.19209	0.009595	0.0017384	3.40565e-08	330069	-2.052	0.04018
12	112225927	rs10774637	T	C	0.18404	-0.0099769	0.0018077	3.40879e-08	330069	-3.269	0.001078
12	49407908	rs10783300	T	C	0.39127	0.0096275	0.001745	3.44905e-08	330069	6.241	4.36e-10
2	76276861	rs13006831	C	T	0.20164	0.0095387	0.0017291	3.4578e-08	330069	0.268	0.7886
7	123694774	rs73720348	A	G	0.3434	0.0095781	0.0017363	3.46099e-08	330069	1.462	0.1438
12	112146911	rs609230	T	C	0.1738	-0.0096408	0.0017481	3.48819e-08	330069	-3.176	0.001496
11	46927877	rs6485706	T	C	0.094741	0.010186	0.0018473	3.50833e-08	330069	-4.011	6.045e-05
5	112257366	rs153557	G	A	0.4665	0.0096659	0.0017532	3.52128e-08	330069	-0.538	0.5909
16	56158461	rs60136705	C	T	0.45197	-0.0096012	0.0017416	3.53346e-08	330069	3.913	9.098e-05
5	112256814	rs149190	G	A	0.4525	0.0096214	0.0017457	3.56287e-08	330069	-0.514	0.6069
3	186193029	rs148675493	C	T	0.00050371	0.12149	0.022052	3.6033e-08	330069	NA	NA
2	172866359	rs7598246	C	T	0.57495	0.0096707	0.0017555	3.61243e-08	330069	0.59	0.5554
2	175150072	rs11695042	G	A	0.19835	0.0094892	0.0017228	3.63329e-08	330069	-1.249	0.2115
12	49419308	rs10875913	C	T	0.3918	0.0096111	0.0017453	3.65595e-08	330069	6.124	9.134e-10
13	58600859	rs9563572	T	C	0.44768	-0.0096027	0.0017438	3.65763e-08	330069	2.415	0.01573
2	59953839	rs1442876	T	C	0.18322	0.0095121	0.0017274	3.661e-08	330069	-1.76	0.0784
2	104327640	rs2219372	T	C	0.61859	0.0095678	0.0017377	3.67198e-08	330069	1.075	0.2824
13	58602233	rs9537922	C	T	0.44766	-0.0095995	0.0017438	3.69488e-08	330069	2.423	0.01537
7	123698126	rs12113570	T	C	0.34882	0.0095752	0.0017398	3.7222e-08	330069	1.33	0.1836
2	76284323	rs13013977	A	G	0.21058	0.0096494	0.0017534	3.7325e-08	330069	0.26	0.7948
9	86462359	rs3119921	A	G	0.26334	0.0097178	0.0017661	3.748e-08	330069	-5.157	2.508e-07
2	71544954	rs4852778	A	G	0.56437	-0.0096549	0.0017547	3.75146e-08	330069	6.064	1.324e-09
2	71631345	rs4852256	T	A	0.56467	-0.0096465	0.0017533	3.7627e-08	330069	5.896	3.718e-09
13	58602529	rs9569804	A	G	0.44759	-0.0095931	0.0017438	3.77138e-08	330069	2.433	0.01496
2	56466049	rs34380906	T	A	0.3971	-0.0095649	0.0017387	3.77659e-08	330069	2.716	0.006603
16	56249536	rs12446609	T	G	0.54907	0.0095781	0.0017412	3.78443e-08	330069	-3.951	7.773e-05
17	50270268	rs12939066	T	C	0.32481	0.009537	0.0017338	3.78879e-08	330069	-1.11	0.2668
15	47874511	rs10519132	A	G	0.22921	0.0094965	0.0017266	3.79665e-08	330069	-2.989	0.0028
17	44121579	rs72836318	C	T	0.23927	0.00953	0.0017328	3.80627e-08	330069	3.26	0.001113
9	86583076	rs696825	T	C	0.26431	0.0098201	0.0017857	3.81681e-08	330069	-4.811	1.503e-06
13	58614187	rs7983206	C	T	0.44773	-0.0095896	0.0017438	3.81856e-08	330069	2.451	0.01426
9	86461095	rs418816	C	G	0.26336	0.0097106	0.0017661	3.83442e-08	330069	-5.233	1.665e-07
13	58600904	rs9537921	G	A	0.44752	-0.0095883	0.0017438	3.83531e-08	330069	2.435	0.0149
2	59961318	rs11685305	C	T	0.18887	0.0095075	0.0017292	3.83619e-08	330069	-2.092	0.03641
2	104183870	rs72820209	T	A	0.3805	-0.009557	0.0017382	3.83884e-08	330069	-1.08	0.2802
19	4069426	rs350832	A	G	0.76066	0.0098718	0.0017956	3.84858e-08	330069	-3.84	0.0001228
13	58600727	rs9563571	C	T	0.44752	-0.0095872	0.0017439	3.85035e-08	330069	2.42	0.0155
13	58607843	rs1409526	G	A	0.44751	-0.0095858	0.0017438	3.86278e-08	330069	2.439	0.01473
13	58623468	rs1409517	G	A	0.44741	-0.0095854	0.0017438	3.87258e-08	330069	2.439	0.01474
13	58662782	rs9537940	A	C	0.44516	-0.0095841	0.0017437	3.87704e-08	330069	2.538	0.01114
13	58615246	rs11618348	C	A	0.44751	-0.0095844	0.0017438	3.87882e-08	330069	2.487	0.01288
7	123685098	rs17628518	A	G	0.34868	0.0095611	0.0017397	3.88866e-08	330069	1.464	0.1431
2	59989621	rs11125812	C	T	0.56852	0.0095673	0.0017409	3.89583e-08	330069	-1.753	0.07964
9	86459970	rs419250	G	A	0.26337	0.0097055	0.001766	3.89673e-08	330069	-5.209	1.902e-07
9	86446938	rs295289	A	T	0.26523	0.009714	0.0017677	3.90032e-08	330069	-5.108	3.263e-07
2	76280257	rs13007136	T	A	0.20505	0.009506	0.00173	3.91381e-08	330069	0.442	0.6582
2	71559107	rs2287326	G	T	0.56151	-0.009678	0.0017613	3.91562e-08	330069	6.05	1.446e-09
11	46922133	rs57368576	G	C	0.091239	0.0098816	0.0017984	3.92013e-08	330069	-3.968	7.249e-05
2	71528309	rs4314015	T	G	0.56428	-0.0096401	0.0017546	3.93007e-08	330069	6.13	8.796e-10
11	47099867	rs61896127	T	C	0.083904	0.0094529	0.0017206	3.93097e-08	330069	-3.778	0.0001578
13	58608409	rs10444649	T	C	0.44752	-0.0095802	0.0017438	3.93459e-08	330069	2.414	0.01576
5	112226977	rs818423	T	C	0.33569	0.009629	0.0017531	3.96187e-08	330069	0.625	0.5317
12	112086099	rs57186456	C	T	0.17405	-0.0096157	0.0017507	3.96643e-08	330069	-3.205	0.00135
1	97219871	rs12022277	G	A	0.097492	0.0095405	0.001737	3.96643e-08	330069	-0.57	0.5688
13	58561539	rs9537900	G	A	0.4486	-0.0095778	0.0017441	3.98933e-08	330069	2.439	0.01473
2	172865775	rs62183783	G	A	0.57595	0.0096401	0.0017556	3.99669e-08	330069	0.703	0.4823
17	50296459	rs12601968	T	G	0.32356	0.0095159	0.001733	3.99945e-08	330069	-0.861	0.3892
11	47036950	rs61899292	A	G	0.084001	0.0094487	0.0017208	4.00037e-08	330069	-3.858	0.0001142
2	174939083	rs35145102	A	G	0.25136	0.0096561	0.0017588	4.01976e-08	330069	-2.1	0.0357
12	112794714	rs7974383	G	T	0.19405	-0.010181	0.0018545	4.02254e-08	330069	-3.018	0.002546
2	172916772	rs2129475	G	A	0.60955	0.0095943	0.0017478	4.03738e-08	330069	0.918	0.3584
12	112776042	rs1468253	C	T	0.19362	-0.010172	0.0018531	4.0411e-08	330069	-3.015	0.002566
2	172916214	rs796839	C	A	0.60955	0.0095937	0.0017478	4.04483e-08	330069	0.88	0.3787
13	58545245	rs9537885	A	G	0.44828	-0.0095743	0.0017444	4.05042e-08	330069	2.377	0.01747
12	112525073	rs7304572	T	C	0.19103	-0.010089	0.0018383	4.06163e-08	330069	-3.222	0.001274
1	97210113	rs61786389	G	A	0.097505	0.0095327	0.001737	4.06818e-08	330069	-0.547	0.5843
1	97242453	rs61786401	G	A	0.09748	0.0095322	0.001737	4.07568e-08	330069	-0.573	0.5664
1	97247761	rs12037594	T	G	0.09748	0.0095311	0.001737	4.08978e-08	330069	-0.595	0.5517
2	162888727	rs2284870	C	T	0.34563	-0.0096461	0.001758	4.09261e-08	330069	6.124	9.132e-10
11	46922596	rs61898531	T	C	0.083648	0.0094524	0.0017228	4.09921e-08	330069	-3.916	9.001e-05
1	97249796	rs17115733	A	G	0.097482	0.0095291	0.001737	4.11623e-08	330069	-0.59	0.5554
12	112132875	rs617044	C	T	0.17317	-0.0095896	0.0017483	4.13904e-08	330069	-3.254	0.001136
2	71533300	rs6731420	C	T	0.56422	-0.0096234	0.0017546	4.14859e-08	330069	6.131	8.758e-10
5	112229688	rs519397	C	T	0.33785	0.0096176	0.0017538	4.16294e-08	330069	0.774	0.4387
12	112133924	rs602276	A	G	0.17314	-0.0095871	0.0017483	4.16965e-08	330069	-3.254	0.001138
9	86494706	rs10123966	C	T	0.26487	0.0097149	0.0017716	4.17157e-08	330069	-4.921	8.593e-07
9	86466968	rs295273	A	G	0.26337	0.009684	0.0017661	4.17446e-08	330069	-5.082	3.726e-07
12	112135275	rs77177960	A	G	0.17314	-0.0095862	0.0017483	4.18312e-08	330069	-3.291	0.0009967
2	71525698	rs7590738	A	G	0.56457	-0.0096177	0.0017544	4.20533e-08	330069	6.079	1.213e-09
13	58464209	rs7991472	T	C	0.55766	0.0095743	0.0017465	4.20824e-08	330069	-2.183	0.02907
2	174957796	rs9636259	T	C	0.34113	0.0095128	0.0017354	4.21502e-08	330069	-1.813	0.06983
12	112355949	rs11066085	T	G	0.35527	-0.0099046	0.0018069	4.21891e-08	330069	-1.574	0.1155
2	56461082	rs12612590	G	A	0.43674	0.0095557	0.0017434	4.22961e-08	330069	-1.889	0.05892
12	112134971	rs695047	C	G	0.17314	-0.0095824	0.0017483	4.23448e-08	330069	-3.246	0.001169
2	155777638	rs10804171	T	C	0.93026	-0.0096283	0.0017569	4.25109e-08	330069	2.684	0.007282
5	112265493	rs154346	G	A	0.60708	0.0095484	0.0017427	4.27563e-08	330069	-0.904	0.3659
11	47013441	rs7107703	A	G	0.083984	0.0094276	0.0017207	4.28351e-08	330069	-3.823	0.0001317
2	71633389	rs6714975	T	C	0.56458	-0.0096067	0.0017534	4.28647e-08	330069	5.834	5.412e-09
13	58625671	rs1575903	G	A	0.44737	-0.0095539	0.0017439	4.28943e-08	330069	2.446	0.01443
2	76473288	rs12464211	A	G	0.70745	-0.0096009	0.0017529	4.32514e-08	330069	0.411	0.6813
13	58626484	rs7318351	T	A	0.44731	-0.0095465	0.0017439	4.39542e-08	330069	2.453	0.01416
12	112441089	rs7306804	G	A	0.19246	-0.010115	0.0018482	4.43711e-08	330069	-3.224	0.001262
13	58626247	rs35329616	T	C	0.4473	-0.0095432	0.0017439	4.44222e-08	330069	2.454	0.01412
11	46693064	rs61884294	T	G	0.084089	0.009423	0.001722	4.44939e-08	330069	-3.763	0.000168
2	172904758	rs1965160	A	G	0.59927	0.0096168	0.0017575	4.45246e-08	330069	1.042	0.2973
12	116758166	rs74550975	G	C	0.1547	0.0094159	0.0017209	4.46581e-08	330069	0.032	0.9745
12	112436533	rs10735077	G	A	0.19226	-0.010108	0.0018477	4.48642e-08	330069	-3.187	0.001436
2	59984273	rs10184100	A	G	0.53057	0.0095273	0.0017416	4.48849e-08	330069	-1.928	0.05386
2	71633275	rs3732233	C	T	0.5638	-0.0096062	0.001756	4.49366e-08	330069	5.912	3.377e-09
2	76262871	rs17750080	C	T	0.20183	0.0094573	0.0017293	4.52898e-08	330069	0.181	0.856
1	97199573	rs17525524	G	C	0.097943	0.0094985	0.0017369	4.54046e-08	330069	-0.733	0.4634
13	58637285	rs9537930	G	A	0.44728	-0.009536	0.0017438	4.54255e-08	330069	2.487	0.01287
9	86522480	rs10868068	T	C	0.26281	0.0096436	0.0017635	4.54674e-08	330069	-4.862	1.16e-06
13	58465840	rs7330191	C	T	0.5581	0.0095462	0.0017458	4.55302e-08	330069	-2.166	0.03031
6	128302874	rs28360516	G	A	0.31236	-0.0095007	0.0017377	4.56667e-08	330069	4.193	2.747e-05
13	58585753	rs1887128	G	A	0.44735	-0.009535	0.001744	4.57299e-08	330069	2.439	0.01471
9	86521428	rs11140289	C	G	0.26281	0.0096415	0.0017635	4.57509e-08	330069	-4.837	1.32e-06
1	183370057	rs6690052	T	A	0.45592	-0.0095261	0.0017426	4.58881e-08	330069	5.25	1.519e-07
17	50294496	rs1503041	G	A	0.32639	0.0094696	0.0017322	4.58881e-08	330069	-1.263	0.2066
11	46982163	rs118016470	G	A	0.08402	0.0094066	0.0017207	4.58987e-08	330069	-3.814	0.000137
12	49412709	rs2293446	A	G	0.38919	0.0095281	0.001743	4.59515e-08	330069	6.14	8.233e-10
17	1256074	rs75543711	A	G	0.082058	-0.009456	0.0017298	4.59621e-08	330069	0.477	0.6334
16	56186449	rs8056306	A	G	0.44834	-0.0095192	0.0017416	4.60893e-08	330069	3.874	0.0001072
16	56184032	rs12597970	A	G	0.44834	-0.0095192	0.0017416	4.60893e-08	330069	3.865	0.0001109
2	172923983	rs6725971	T	C	0.59967	0.009599	0.0017562	4.61318e-08	330069	0.789	0.4303
5	112211786	rs712671	C	T	0.65051	-0.0095784	0.0017525	4.62168e-08	330069	-0.36	0.7191
16	56180550	rs11863682	T	A	0.44834	-0.0095182	0.0017416	4.62488e-08	330069	3.877	0.0001059
17	50290356	rs34409294	G	A	0.32643	0.0094676	0.0017324	4.63127e-08	330069	-1.23	0.2189
13	58565945	rs7990795	T	G	0.44824	-0.0095248	0.0017429	4.63447e-08	330069	2.405	0.01616
12	112505182	rs7972112	A	T	0.19223	-0.010095	0.0018474	4.64195e-08	330069	-3.307	0.0009421
12	112181174	rs57454118	G	T	0.1549	-0.0095346	0.0017448	4.64301e-08	330069	-3.012	0.002599
2	24234440	rs925229	G	A	0.4464	0.0095239	0.0017431	4.6623e-08	330069	3.362	0.0007738
9	86497334	rs13290882	A	G	0.26351	0.0096482	0.001766	4.67951e-08	330069	-4.864	1.149e-06
9	86525580	rs7033292	A	G	0.2628	0.0096345	0.0017635	4.67951e-08	330069	-4.815	1.473e-06
17	50295022	rs35311452	A	G	0.32471	0.0094705	0.0017335	4.68166e-08	330069	-1.245	0.213
11	47168254	rs1352307	G	A	0.083585	0.0093863	0.0017182	4.68813e-08	330069	-3.743	0.0001819
12	49398862	rs2293445	A	G	0.38804	0.0095108	0.001741	4.69245e-08	330069	6.225	4.812e-10
9	86507442	rs963459	C	G	0.26363	0.0096471	0.001766	4.6957e-08	330069	-4.82	1.438e-06
13	58568049	rs9537904	A	G	0.44736	-0.0095268	0.0017441	4.70111e-08	330069	2.44	0.01468
11	46983238	rs61899283	G	A	0.084032	0.0093986	0.0017208	4.71411e-08	330069	-3.819	0.000134
13	58583168	rs9537913	G	A	0.44735	-0.0095257	0.0017441	4.71628e-08	330069	2.436	0.01483
15	26041539	rs73366961	A	G	0.00056496	0.086736	0.015881	4.72063e-08	330069	NA	NA
7	44927952	rs6978258	C	T	0.073276	-0.0096432	0.0017657	4.72498e-08	330069	3.131	0.001743
13	58575268	rs9537908	C	T	0.44735	-0.0095252	0.0017441	4.72498e-08	330069	2.459	0.01393
13	58578107	rs7988274	C	A	0.44735	-0.0095248	0.0017441	4.72933e-08	330069	2.472	0.01342
18	34441664	rs11081968	C	A	0.32885	-0.0095899	0.001756	4.7326e-08	330069	1.108	0.2679
13	58585768	rs1887129	T	C	0.44726	-0.0095245	0.0017441	4.73696e-08	330069	2.435	0.01491
12	112571169	rs10850003	A	G	0.19166	-0.010073	0.0018447	4.74679e-08	330069	-3.067	0.00216
2	172872042	rs6737308	A	G	0.57598	0.0095866	0.0017557	4.75554e-08	330069	0.704	0.4812
2	104387855	rs671722	A	G	0.59529	0.0094916	0.0017385	4.77419e-08	330069	1.8	0.07181
2	71646017	rs2419079	A	T	0.56489	-0.0095726	0.0017534	4.77639e-08	330069	5.923	3.16e-09
18	34469537	rs1246627	C	G	0.32787	-0.0095866	0.001756	4.78079e-08	330069	1.16	0.246
6	128309768	rs13200150	G	A	0.31069	-0.0094819	0.0017369	4.79402e-08	330069	4.127	3.669e-05
2	174965611	rs75107833	G	A	0.3423	0.0094716	0.0017351	4.79513e-08	330069	-1.879	0.06022
18	34453333	rs7241317	C	G	0.3288	-0.0095854	0.001756	4.80065e-08	330069	1.105	0.269
11	47207362	rs4463814	A	G	0.087418	0.009492	0.0017389	4.80176e-08	330069	-3.626	0.0002882
18	34460256	rs9965351	C	T	0.32879	-0.0095852	0.001756	4.80176e-08	330069	1.163	0.2449
18	34457981	rs11659660	T	C	0.32876	-0.0095841	0.0017558	4.80286e-08	330069	1.161	0.2456
2	76413305	rs2177500	T	G	0.18076	0.0094231	0.0017263	4.80618e-08	330069	-0.475	0.6348
12	112113508	rs12427276	A	G	0.17409	-0.0095549	0.0017505	4.81061e-08	330069	-3.291	0.0009974
1	97265063	rs113658986	G	A	0.097701	0.0094809	0.001737	4.81393e-08	330069	-0.636	0.525
18	34455344	rs11876160	A	G	0.32876	-0.0095829	0.0017558	4.82059e-08	330069	1.161	0.2457
10	63681642	rs72833349	T	C	0.33468	0.0094534	0.0017322	4.83281e-08	330069	-1.139	0.2548
12	112581259	rs6489828	C	T	0.19176	-0.010071	0.0018454	4.84395e-08	330069	-3.081	0.002064
[truncated: 24 more rows]
