# Supplementary material for: Study of 300,486 individuals identifies 148 independent genetic loci influencing general cognitive function
Source: Nat Commun. 2018 May 29;9:2098. doi: 10.1038/s41467-018-04362-x (PMC5974083; doi:10.1038/s41467-018-04362-x)
Supplement: Supplementary file 14 — Supplementary Data 11 [file 41467_2018_4362_MOESM14_ESM.xlsx]

## Sheet: Sheet1
Supplementary Data 11. Genome-wide suggestive (1 x 10-5 > P > 5 x 10-8 ) SNP association results for UK Biobank reaction time.
CHR	BP	SNP	Allele 1	Allele 2	EAF	Effect	SE	P	N
1	183278553	rs536586	A	C	0.41761	-0.0094854	0.00174	5.0038e-08	330069
5	112230331	rs465454	C	T	0.33689	0.009559	0.0017537	5.01649e-08	330069
2	71621230	rs6744886	A	G	0.56296	-0.0095713	0.001756	5.02458e-08	330069
13	58565876	rs1036449	T	C	0.44723	-0.0095064	0.0017441	5.02574e-08	330069
5	112438837	rs72803246	C	G	0.29413	0.009474	0.0017384	5.04313e-08	330069
12	112256042	rs9971942	T	C	0.18506	-0.0098147	0.0018011	5.06407e-08	330069
7	44927702	rs55947897	A	G	0.069989	-0.0094277	0.0017302	5.06757e-08	330069
17	50274393	rs34732569	A	G	0.32444	0.0094475	0.0017338	5.07107e-08	330069
12	112661263	rs7956202	G	T	0.19187	-0.010022	0.0018393	5.07575e-08	330069
16	56206446	rs1734192	C	T	0.55159	0.0094892	0.0017415	5.07692e-08	330069
2	59960023	rs17597864	C	T	0.18724	0.0093919	0.0017237	5.07925e-08	330069
13	58568714	rs7986644	G	A	0.44719	-0.0095025	0.0017441	5.08862e-08	330069
13	58564927	rs1036451	C	T	0.44726	-0.0095018	0.001744	5.09331e-08	330069
2	174961488	rs2044469	G	A	0.34345	0.009453	0.0017351	5.09683e-08	330069
2	71676366	rs4241246	A	C	0.56431	-0.0095654	0.0017558	5.10035e-08	330069
12	112118576	rs847895	C	T	0.17427	-0.009541	0.0017515	5.11446e-08	330069
2	59991656	rs10172985	A	T	0.56589	0.0094838	0.001741	5.11446e-08	330069
17	50271517	rs12601842	A	G	0.32443	0.0094448	0.0017338	5.11682e-08	330069
2	71568206	rs1990774	G	A	0.56341	-0.0095658	0.0017561	5.118e-08	330069
17	50287448	rs1969089	A	C	0.32618	0.0094368	0.0017325	5.12507e-08	330069
2	71572917	rs6746731	G	T	0.56476	-0.0095507	0.0017534	5.12861e-08	330069
2	71645257	rs1986522	G	A	0.56356	-0.0095618	0.001756	5.17726e-08	330069
2	76260716	rs72820790	C	A	0.20352	0.0094152	0.0017291	5.18084e-08	330069
12	112501766	rs7978068	G	T	0.19238	-0.010057	0.0018472	5.20236e-08	330069
12	111746678	rs3847952	G	T	0.26229	-0.0099741	0.0018322	5.21675e-08	330069
7	109766589	rs78943159	G	A	0.055685	-0.0096456	0.0017718	5.21675e-08	330069
2	71542781	rs6546683	T	C	0.56396	-0.0095507	0.0017546	5.23359e-08	330069
12	112260065	rs2106697	C	T	0.19227	-0.010056	0.0018475	5.24445e-08	330069
2	104479862	rs1441102	T	A	0.53161	0.0095365	0.0017521	5.25049e-08	330069
17	50285434	rs10514996	A	G	0.32451	0.0094358	0.0017338	5.26017e-08	330069
5	112223601	rs712664	C	A	0.33127	0.0094837	0.0017426	5.26866e-08	330069
12	112425746	rs4767264	C	T	0.19134	-0.010062	0.0018489	5.27351e-08	330069
13	58570772	rs986833	G	A	0.44738	-0.0094915	0.0017441	5.27473e-08	330069
18	34494647	rs7234039	T	C	0.67115	0.0095566	0.0017561	5.27473e-08	330069
17	1273903	rs74776107	G	T	0.082143	-0.0094199	0.001731	5.27716e-08	330069
5	112229903	rs461424	A	G	0.33079	0.0094647	0.0017395	5.29907e-08	330069
7	109766336	rs74959496	T	A	0.056763	-0.0097205	0.0017865	5.30274e-08	330069
17	50271674	rs12601870	A	G	0.32444	0.0094334	0.0017339	5.31251e-08	330069
1	49957136	rs4926814	G	A	0.55869	0.0096234	0.0017689	5.31863e-08	330069
2	71627539	rs3771371	T	C	0.55985	-0.0095964	0.001764	5.33089e-08	330069
5	112229523	rs434090	G	A	0.33466	0.0094833	0.0017433	5.34072e-08	330069
3	23206359	rs4283589	C	G	0.55168	-0.0094849	0.0017442	5.38766e-08	330069
17	50271048	rs66798475	A	G	0.32446	0.0094267	0.0017339	5.42625e-08	330069
12	112258445	rs10774639	A	G	0.18516	-0.0097916	0.0018012	5.44377e-08	330069
2	56442947	rs34377123	G	A	0.43317	0.0095002	0.0017475	5.44377e-08	330069
2	71589913	rs3771374	G	A	0.56297	-0.0095451	0.0017558	5.44377e-08	330069
12	111758620	rs4766505	G	A	0.26245	-0.0099655	0.0018332	5.44503e-08	330069
12	112403931	rs7963329	G	A	0.19179	-0.01002	0.0018433	5.45884e-08	330069
1	49923504	rs6588350	C	T	0.61825	0.0095749	0.0017615	5.46512e-08	330069
13	58263290	rs4353386	G	A	0.44293	-0.0094812	0.0017443	5.47016e-08	330069
5	139629450	rs6869910	C	T	0.4402	-0.0095025	0.0017483	5.47142e-08	330069
12	111746499	rs3843673	G	A	0.26198	-0.0099589	0.0018323	5.47394e-08	330069
18	34491524	rs4799891	C	T	0.67132	0.0095445	0.0017561	5.47772e-08	330069
5	112218700	rs1093677	C	T	0.33133	0.0094727	0.001743	5.49414e-08	330069
2	71584201	rs56408212	T	C	0.5647	-0.0095285	0.0017533	5.49921e-08	330069
12	112404838	rs9630276	A	G	0.19232	-0.010041	0.0018477	5.50301e-08	330069
11	46749334	rs3136469	A	T	0.084192	0.0093761	0.0017254	5.51442e-08	330069
2	71636036	rs12474072	G	A	0.56549	-0.009528	0.0017534	5.51442e-08	330069
11	47198638	rs61897848	T	C	0.084899	0.0093358	0.0017181	5.5195e-08	330069
17	43987942	rs60128610	A	T	0.21159	-0.0094503	0.0017393	5.5335e-08	330069
12	112196611	rs7978737	T	C	0.17952	-0.0096858	0.0017828	5.54626e-08	330069
11	46695414	rs13448	C	T	0.27211	0.0095439	0.0017567	5.55265e-08	330069
2	71662826	rs7562587	A	C	0.56359	-0.0095395	0.001756	5.55648e-08	330069
9	86639109	rs10868082	G	T	0.74171	-0.0095779	0.0017631	5.56032e-08	330069
2	71553752	rs12464713	T	C	0.56281	-0.0095392	0.001756	5.56288e-08	330069
5	112217737	rs35726351	A	G	0.33517	0.009523	0.0017531	5.56929e-08	330069
16	56149052	rs1477090	C	G	0.43925	-0.0094585	0.0017412	5.57314e-08	330069
5	112257908	rs153556	C	T	0.46527	0.0094776	0.0017448	5.57442e-08	330069
2	71530558	rs7609266	C	G	0.56399	-0.0095307	0.0017546	5.57699e-08	330069
2	71575259	rs3771376	G	A	0.565	-0.0095237	0.0017534	5.58985e-08	330069
11	46455533	rs61882704	T	C	0.084209	0.0093572	0.0017229	5.60015e-08	330069
17	1251996	rs8075892	T	G	0.082202	-0.0093946	0.0017298	5.60273e-08	330069
9	86577541	rs796007	A	G	0.25732	0.0095539	0.0017592	5.61177e-08	330069
12	112217138	rs11613713	T	C	0.17165	-0.0094582	0.0017417	5.62341e-08	330069
2	71529331	rs7605066	T	C	0.56335	-0.0095347	0.0017561	5.65327e-08	330069
1	50514389	rs4537610	T	C	0.6097	0.0095508	0.0017592	5.66892e-08	330069
9	86472376	rs167180	G	T	0.26107	0.0095485	0.0017588	5.67545e-08	330069
5	112250376	rs153565	T	A	0.37287	0.0095764	0.0017642	5.69771e-08	330069
17	50282834	rs4605214	T	C	0.32613	0.0094041	0.0017325	5.70164e-08	330069
1	183279029	rs602182	T	G	0.41765	-0.0094447	0.00174	5.70427e-08	330069
1	183362646	rs2788060	T	C	0.45627	-0.0094582	0.0017425	5.70558e-08	330069
2	71580129	rs2058899	A	G	0.56461	-0.0095159	0.0017534	5.73324e-08	330069
2	71594906	rs2419076	A	G	0.56474	-0.0095151	0.0017533	5.73456e-08	330069
7	44925674	rs73102133	T	G	0.068784	-0.0093534	0.0017235	5.73456e-08	330069
16	56200376	rs1562817	G	A	0.46349	-0.0094482	0.001741	5.73588e-08	330069
11	45066139	rs11038283	G	C	0.45316	0.0094582	0.001743	5.75175e-08	330069
2	71555356	rs1861848	C	T	0.5631	-0.0095288	0.001756	5.75307e-08	330069
11	46652742	rs61884270	T	G	0.084147	0.0093454	0.0017223	5.76368e-08	330069
11	46744369	rs3136448	A	G	0.083796	0.0093597	0.0017249	5.76501e-08	330069
12	112328230	rs6489819	A	C	0.18575	-0.0097831	0.0018031	5.77963e-08	330069
5	112244423	rs446567	C	T	0.32928	0.009459	0.0017435	5.78895e-08	330069
7	109768468	rs79473994	C	G	0.055473	-0.0096059	0.0017706	5.79295e-08	330069
18	34509273	rs6507184	G	A	0.67128	0.0095269	0.0017561	5.80096e-08	330069
12	112351854	rs61670030	T	C	0.19222	-0.010018	0.001847	5.83579e-08	330069
7	109763442	rs150646823	C	G	0.055662	-0.0096096	0.0017718	5.84252e-08	330069
1	183380611	rs1361198	G	T	0.45084	-0.0094664	0.0017454	5.84925e-08	330069
1	49953367	rs2356615	C	T	0.56108	0.0095646	0.0017636	5.85329e-08	330069
11	46929777	rs7102325	A	G	0.094212	0.01002	0.0018477	5.85733e-08	330069
1	183383643	rs4652800	C	T	0.45075	-0.0094649	0.0017454	5.87354e-08	330069
2	71636240	rs4852782	C	T	0.56549	-0.0095078	0.0017534	5.88166e-08	330069
2	71613914	rs7557781	G	A	0.56468	-0.0095058	0.0017533	5.90609e-08	330069
2	71647809	rs4852785	A	C	0.5647	-0.0095058	0.0017534	5.91834e-08	330069
2	71584485	rs7568069	A	G	0.56467	-0.0095052	0.0017533	5.92379e-08	330069
18	34507739	rs4799893	T	A	0.67127	0.0095204	0.0017562	5.92652e-08	330069
13	58562244	rs9527747	G	C	0.44733	-0.0094546	0.001744	5.92789e-08	330069
12	112922529	rs11066322	A	G	0.19188	-0.0099604	0.0018374	5.93198e-08	330069
12	112392036	rs11066099	G	C	0.19139	-0.010022	0.0018488	5.94155e-08	330069
11	46486059	rs79078082	G	A	0.084352	0.0093413	0.0017237	5.98136e-08	330069
1	49985361	rs1405915	T	C	0.61847	0.0095463	0.0017615	5.98136e-08	330069
12	111742222	rs1362006	C	T	0.26077	-0.0099299	0.0018323	5.98549e-08	330069
12	112207300	rs56884502	A	T	0.17308	-0.0094723	0.0017484	6.04505e-08	330069
12	112208838	rs74849450	G	C	0.17309	-0.0094724	0.0017484	6.04505e-08	330069
16	56155718	rs7202833	T	C	0.45109	-0.0094348	0.0017416	6.05202e-08	330069
1	49953110	rs7543649	G	T	0.56106	0.0095537	0.0017636	6.05899e-08	330069
18	34597514	rs186525	A	G	0.6716	0.0095138	0.0017563	6.06317e-08	330069
16	56214483	rs1668322	T	C	0.55304	0.0094278	0.0017404	6.07016e-08	330069
1	49956912	rs12402477	G	A	0.56105	0.0095525	0.0017636	6.08555e-08	330069
12	49419677	rs11168827	C	G	0.38435	0.0094337	0.0017418	6.09256e-08	330069
2	23973799	rs6751857	C	T	0.44743	0.0094529	0.0017456	6.12915e-08	330069
1	49966142	rs61783601	C	G	0.5611	0.0095503	0.0017637	6.13056e-08	330069
12	112206685	rs2283354	A	G	0.17287	-0.0094626	0.0017475	6.13479e-08	330069
17	50276929	rs34889414	G	C	0.32609	0.009381	0.0017325	6.14469e-08	330069
2	71674476	rs4332945	G	T	0.56365	-0.0095067	0.0017558	6.1546e-08	330069
2	104420858	rs6707445	A	G	0.43626	-0.009457	0.0017467	6.16453e-08	330069
2	59987410	rs2165763	G	A	0.56673	0.0094287	0.0017417	6.18301e-08	330069
12	112310580	rs6489818	A	G	0.19208	-0.0099974	0.0018468	6.18871e-08	330069
2	56491604	rs214046	C	T	0.7291	0.0093199	0.0017218	6.20012e-08	330069
2	71556167	rs6744751	T	G	0.56379	-0.0094966	0.0017544	6.20583e-08	330069
1	183384395	rs12745288	A	G	0.45075	-0.0094469	0.0017454	6.22157e-08	330069
7	123691640	rs57155492	T	C	0.3512	0.0094003	0.0017368	6.22157e-08	330069
17	50279497	rs17677532	T	C	0.32611	0.009377	0.0017325	6.223e-08	330069
11	46977408	rs61899282	T	C	0.083974	0.0093132	0.0017208	6.23448e-08	330069
2	71596041	rs6740645	T	C	0.56467	-0.0094879	0.0017533	6.25749e-08	330069
11	46923107	rs61382645	T	C	0.089746	0.0096544	0.0017841	6.26037e-08	330069
12	112217208	rs11609628	A	G	0.17284	-0.0094561	0.0017475	6.26037e-08	330069
11	46958299	rs17787930	T	G	0.083991	0.0093112	0.0017208	6.2748e-08	330069
2	104421692	rs6711584	A	G	0.43655	-0.0094513	0.0017467	6.27625e-08	330069
18	34501310	rs8097677	T	G	0.67152	0.0095022	0.0017562	6.27914e-08	330069
11	46906231	rs7105172	C	T	0.092814	0.0098506	0.0018208	6.30522e-08	330069
12	112214459	rs2238152	T	G	0.17306	-0.0094585	0.0017484	6.31539e-08	330069
2	24241950	rs34686340	G	A	0.45864	0.0094319	0.0017438	6.35477e-08	330069
2	172901699	rs13020884	G	T	0.6187	0.0095064	0.0017576	6.35477e-08	330069
9	86522550	rs13296528	T	C	0.26114	0.0095125	0.0017588	6.35624e-08	330069
5	112213805	rs2545166	G	C	0.66849	-0.0094268	0.0017431	6.37236e-08	330069
2	24054632	rs6734395	T	C	0.44554	0.0094311	0.0017439	6.37529e-08	330069
2	71609073	rs6745907	G	A	0.56435	-0.0094822	0.0017534	6.37529e-08	330069
12	112158966	rs630616	C	T	0.17348	-0.0094563	0.0017486	6.37676e-08	330069
18	34504970	rs2034213	C	G	0.67153	0.0094975	0.0017562	6.3797e-08	330069
5	112234498	rs151978	G	T	0.3328	0.0094276	0.0017434	6.39588e-08	330069
5	112210344	rs382260	T	C	0.6686	-0.0094235	0.0017427	6.39882e-08	330069
5	112186064	rs481789	A	C	0.64919	-0.0093908	0.0017367	6.40619e-08	330069
18	34614913	rs322650	C	T	0.67135	0.0094969	0.0017564	6.4121e-08	330069
18	34603781	rs2629958	G	A	0.67135	0.0094968	0.0017564	6.41357e-08	330069
2	76404263	rs11126503	T	C	0.61567	-0.0094859	0.0017544	6.41505e-08	330069
18	34616966	rs322651	G	A	0.67135	0.0094966	0.0017564	6.418e-08	330069
18	34621204	rs7244564	T	C	0.67135	0.0094963	0.0017564	6.42096e-08	330069
5	112234549	rs151977	T	A	0.33277	0.0094282	0.0017438	6.42244e-08	330069
9	86537665	rs1889113	T	A	0.26111	0.0095086	0.0017588	6.44021e-08	330069
18	34519270	rs7244957	G	C	0.67137	0.0094936	0.0017562	6.45357e-08	330069
1	49969978	rs11583504	G	C	0.56099	0.0095331	0.0017636	6.47292e-08	330069
5	112238882	rs153545	C	T	0.33021	0.0094265	0.001744	6.48037e-08	330069
12	112418918	rs2106956	T	C	0.18435	-0.0097375	0.0018017	6.49382e-08	330069
2	71563549	rs17692517	G	T	0.56449	-0.009476	0.0017534	6.51178e-08	330069
6	128322912	rs2326670	C	G	0.31681	-0.009401	0.0017396	6.51778e-08	330069
5	112236448	rs151976	T	C	0.33301	0.0094209	0.0017434	6.53281e-08	330069
12	111735954	rs1344438	G	C	0.26589	-0.0098703	0.0018266	6.53431e-08	330069
2	71660804	rs10173072	T	C	0.43512	0.0094739	0.0017533	6.54034e-08	330069
12	112338539	rs3742000	C	T	0.19222	-0.0099787	0.0018467	6.54184e-08	330069
18	34547897	rs9949826	T	C	0.67138	0.0094906	0.0017564	6.54485e-08	330069
5	112213071	rs2545167	T	G	0.66863	-0.0094162	0.0017427	6.54787e-08	330069
18	34637540	rs8082737	G	A	0.32863	-0.0094893	0.0017563	6.56296e-08	330069
1	183362544	rs2811566	A	G	0.45638	-0.0094146	0.0017425	6.56448e-08	330069
18	34553284	rs8093040	T	C	0.67135	0.009489	0.0017564	6.57658e-08	330069
18	34699047	rs1485820	G	A	0.32863	-0.0094885	0.0017563	6.57809e-08	330069
18	34648977	rs9954330	T	C	0.32862	-0.0094885	0.0017564	6.58112e-08	330069
18	34635047	rs11873298	T	A	0.32863	-0.0094883	0.0017563	6.58264e-08	330069
16	56242182	rs1871200	C	T	0.55039	0.0094049	0.0017412	6.62064e-08	330069
16	56242477	rs12708960	A	G	0.55041	0.0094049	0.0017412	6.62369e-08	330069
11	46919895	rs7112518	A	C	0.090854	0.0097124	0.0017982	6.62522e-08	330069
16	56242870	rs1585706	G	A	0.5504	0.009404	0.0017412	6.63896e-08	330069
18	34543990	rs12963071	A	G	0.67135	0.0094859	0.0017564	6.63896e-08	330069
18	34687457	rs2017596	G	A	0.32866	-0.0094849	0.0017562	6.64049e-08	330069
1	183386537	rs12035399	G	A	0.45087	-0.0094283	0.0017458	6.64661e-08	330069
18	34591719	rs322639	T	C	0.67136	0.009485	0.0017564	6.65886e-08	330069
18	34606455	rs139687855	A	G	0.67137	0.009485	0.0017564	6.66193e-08	330069
2	71604358	rs4852779	C	A	0.56445	-0.0094681	0.0017534	6.6696e-08	330069
2	59952274	rs10176878	C	T	0.188	0.0093353	0.0017289	6.68498e-08	330069
18	34559879	rs9948487	G	A	0.67136	0.0094838	0.0017564	6.68806e-08	330069
12	112402717	rs7315950	G	A	0.1854	-0.0097268	0.0018015	6.69422e-08	330069
1	97241849	rs61786400	T	C	0.099622	0.0093753	0.0017365	6.70811e-08	330069
18	34649301	rs11662022	T	C	0.32861	-0.0094823	0.0017564	6.71274e-08	330069
18	34515576	rs10164233	A	G	0.67134	0.0094812	0.0017562	6.71429e-08	330069
2	71602535	rs66793870	G	A	0.56497	-0.0094656	0.0017533	6.72048e-08	330069
18	34677117	rs323317	G	C	0.32866	-0.0094812	0.0017563	6.72977e-08	330069
18	34557326	rs9304168	G	C	0.67137	0.0094813	0.0017564	6.74062e-08	330069
18	34515400	rs11665174	G	A	0.67135	0.00948	0.0017562	6.74217e-08	330069
18	34557421	rs9304169	T	A	0.67137	0.0094803	0.0017564	6.76083e-08	330069
18	34532038	rs9789231	T	C	0.67132	0.0094796	0.0017563	6.7655e-08	330069
18	34549840	rs8083306	A	G	0.67137	0.0094801	0.0017564	6.7655e-08	330069
18	34551343	rs9945251	A	G	0.67136	0.00948	0.0017564	6.7655e-08	330069
9	86532613	rs10868071	T	A	0.26107	0.0094929	0.0017588	6.76706e-08	330069
5	112199974	rs351769	T	C	0.66625	-0.0094615	0.0017532	6.79516e-08	330069
11	46929954	rs10838634	G	A	0.89359	-0.0099453	0.0018429	6.80299e-08	330069
18	34516841	rs12454417	G	A	0.67133	0.0094762	0.0017562	6.82025e-08	330069
2	71658017	rs6546692	A	T	0.44734	0.0095144	0.0017634	6.83282e-08	330069
12	112333660	rs4766705	A	C	0.18528	-0.0097184	0.0018013	6.84542e-08	330069
18	34582497	rs8088359	G	C	0.67138	0.0094763	0.0017564	6.84542e-08	330069
11	46928455	rs7128102	A	G	0.091195	0.0097223	0.0018021	6.86278e-08	330069
9	86509330	rs1831757	C	T	0.26094	0.0094837	0.0017579	6.86436e-08	330069
18	34713906	rs1683516	T	C	0.32864	-0.0094745	0.0017562	6.86594e-08	330069
18	34572061	rs6507189	G	C	0.6714	0.0094746	0.0017564	6.88335e-08	330069
18	34693195	rs1699056	G	A	0.32866	-0.0094728	0.0017562	6.90081e-08	330069
5	112220556	rs864682	T	C	0.33359	0.0094318	0.0017487	6.90876e-08	330069
18	34721029	rs323325	A	G	0.32867	-0.0094723	0.0017563	6.9215e-08	330069
18	34647560	rs8088772	A	G	0.32868	-0.0094724	0.0017563	6.92309e-08	330069
18	34720887	rs323324	G	A	0.32867	-0.0094721	0.0017563	6.92628e-08	330069
18	34635452	rs2171106	T	C	0.32869	-0.009472	0.0017563	6.92947e-08	330069
18	34593800	rs2629966	A	T	0.67136	0.009472	0.0017564	6.93585e-08	330069
12	112131698	rs632650	T	G	0.15491	-0.0094698	0.001756	6.94384e-08	330069
18	34698731	rs170452	A	C	0.32867	-0.0094713	0.0017563	6.94384e-08	330069
18	34701175	rs323330	A	G	0.32867	-0.0094713	0.0017563	6.94384e-08	330069
12	111735537	rs933307	T	G	0.26589	-0.0098494	0.0018265	6.95024e-08	330069
12	112273059	rs12315114	C	T	0.18525	-0.0097137	0.0018013	6.95505e-08	330069
18	34665702	rs323296	T	C	0.32869	-0.009471	0.0017564	6.95665e-08	330069
1	49771108	rs6702977	T	C	0.61593	0.009493	0.0017604	6.95665e-08	330069
18	34712267	rs323308	G	A	0.32868	-0.0094703	0.0017563	6.96627e-08	330069
18	34674412	rs323319	A	T	0.32874	-0.0094701	0.0017563	6.96947e-08	330069
2	56453588	rs1160648	T	C	0.39916	0.0094117	0.0017455	6.96947e-08	330069
17	50260366	rs34626694	T	C	0.32119	0.0093467	0.0017334	6.97108e-08	330069
18	34672766	rs323321	G	T	0.32869	-0.0094704	0.0017564	6.97108e-08	330069
12	112375308	rs2285695	G	T	0.18543	-0.0097148	0.0018018	6.98072e-08	330069
12	112365523	rs11066090	C	T	0.18537	-0.0097128	0.0018015	6.98554e-08	330069
18	34722503	rs323327	T	C	0.32865	-0.0094687	0.0017562	6.98554e-08	330069
18	34576790	rs880714	G	A	0.67134	0.0094687	0.0017564	7.00971e-08	330069
18	34707916	rs323303	G	A	0.32875	-0.0094674	0.0017563	7.03234e-08	330069
12	112376297	rs3752632	T	C	0.18536	-0.0097087	0.0018014	7.06643e-08	330069
12	112350403	rs11066079	T	G	0.18534	-0.0097079	0.0018012	7.06806e-08	330069
12	112350404	rs11066080	A	T	0.18534	-0.0097079	0.0018012	7.06806e-08	330069
12	112221353	rs79463616	A	G	0.1731	-0.0094224	0.0017484	7.08272e-08	330069
16	56241470	rs1026710	G	T	0.55006	0.0093836	0.0017412	7.08435e-08	330069
2	71590964	rs4852255	G	C	0.56467	-0.0094488	0.0017533	7.08435e-08	330069
5	112216389	rs419632	T	C	0.33512	0.0094468	0.0017531	7.10068e-08	330069
18	34520888	rs12958843	T	C	0.67137	0.0094627	0.0017562	7.12361e-08	330069
12	112246954	rs7296651	G	C	0.18882	-0.0099789	0.0018521	7.13017e-08	330069
2	24033707	rs4384732	A	C	0.45159	0.0093961	0.0017439	7.13674e-08	330069
5	112185451	rs565603	G	A	0.64754	-0.0093695	0.001739	7.13674e-08	330069
2	76404044	rs34908694	C	T	0.20477	0.0093575	0.001737	7.15979e-08	330069
6	130622740	rs6937866	A	G	0.29264	-0.009434	0.0017513	7.17794e-08	330069
18	34650282	rs1683510	G	T	0.32873	-0.0094607	0.0017563	7.18456e-08	330069
1	183348252	rs3122177	C	T	0.45913	-0.009388	0.0017428	7.18456e-08	330069
2	172901887	rs7586556	C	G	0.61859	0.0094715	0.0017584	7.18621e-08	330069
12	112301760	rs11066051	C	G	0.18522	-0.009702	0.0018013	7.19946e-08	330069
12	112277406	rs6489810	C	T	0.18524	-0.0097028	0.0018014	7.20112e-08	330069
6	128307725	rs6905941	C	T	0.31244	-0.0093576	0.0017374	7.21606e-08	330069
18	34521293	rs7227303	T	C	0.67132	0.0094583	0.0017562	7.22104e-08	330069
12	112394260	rs7295722	T	C	0.18447	-0.0097053	0.0018022	7.23936e-08	330069
12	112398910	rs10849990	C	T	0.18446	-0.0097048	0.0018022	7.24603e-08	330069
12	112399454	rs7970920	G	T	0.18446	-0.0097048	0.0018022	7.24603e-08	330069
12	112292108	rs4767072	C	T	0.18523	-0.0097005	0.0018014	7.2477e-08	330069
12	111741315	rs6490048	C	T	0.2604	-0.0098621	0.0018314	7.2527e-08	330069
17	50293499	rs34127605	C	T	0.31348	0.0093264	0.001732	7.2527e-08	330069
2	59993191	rs4672313	C	T	0.57845	0.0093741	0.0017409	7.2644e-08	330069
12	112354075	rs4767202	C	T	0.1863	-0.0097294	0.0018069	7.26775e-08	330069
2	71613478	rs67817805	G	A	0.56034	-0.0094899	0.0017625	7.2778e-08	330069
17	50290955	rs12936283	T	C	0.31349	0.0093251	0.0017321	7.29962e-08	330069
12	112287102	rs2339841	C	T	0.18523	-0.0096978	0.0018014	7.30971e-08	330069
12	112292962	rs4767074	C	G	0.18523	-0.0096976	0.0018014	7.31139e-08	330069
18	34644340	rs9961412	G	A	0.32874	-0.0094549	0.0017563	7.31644e-08	330069
13	58270224	rs11619022	C	T	0.44331	-0.0093904	0.0017444	7.31813e-08	330069
18	34524419	rs9955025	G	C	0.67116	0.0094538	0.0017562	7.32487e-08	330069
5	112245970	rs468783	T	G	0.32733	0.0093833	0.0017431	7.32656e-08	330069
18	34661006	rs2930873	C	T	0.32874	-0.0094543	0.0017563	7.33162e-08	330069
2	71594534	rs10445946	T	C	0.56331	-0.0094501	0.0017559	7.37564e-08	330069
12	112328503	rs6489820	C	T	0.1853	-0.0096943	0.0018014	7.39435e-08	330069
11	46908250	rs12281784	T	C	0.091141	0.0096758	0.0017983	7.4319e-08	330069
11	46915192	rs12294921	A	G	0.089729	0.0095983	0.0017842	7.47309e-08	330069
11	46744357	rs3136446	A	G	0.082712	0.0092801	0.0017251	7.47825e-08	330069
1	50290101	rs4926831	T	C	0.55774	0.0094827	0.0017629	7.49376e-08	330069
1	50290289	rs6680547	T	C	0.55776	0.0094825	0.0017629	7.49549e-08	330069
2	71601434	rs17693250	G	T	0.5637	-0.009445	0.0017559	7.49894e-08	330069
2	76287352	rs13034330	G	A	0.21181	0.0093136	0.0017316	7.50412e-08	330069
7	44860709	rs62460509	T	C	0.073982	-0.0093206	0.0017329	7.50758e-08	330069
2	23997661	rs7558918	G	T	0.44769	0.0093851	0.0017449	7.51104e-08	330069
6	130609154	rs10872358	G	A	0.28744	-0.0093755	0.0017431	7.51277e-08	330069
12	112385665	rs9788231	C	A	0.18544	-0.0096856	0.0018009	7.53356e-08	330069
16	56232948	rs8047346	A	G	0.56153	0.0093618	0.0017408	7.53876e-08	330069
1	50254614	rs6588360	A	G	0.55778	0.0094791	0.0017629	7.5753e-08	330069
18	34664093	rs323295	G	A	0.32874	-0.009444	0.0017565	7.59277e-08	330069
6	130609168	rs10872359	G	A	0.28742	-0.0093717	0.001743	7.59277e-08	330069
5	112185393	rs565453	C	A	0.64751	-0.0093503	0.0017391	7.59626e-08	330069
12	112181226	rs59905228	T	C	0.1738	-0.0094062	0.0017496	7.60852e-08	330069
17	50291040	rs35359524	T	C	0.31448	0.0093106	0.001732	7.63308e-08	330069
6	130609550	rs11154562	A	G	0.28739	-0.0093696	0.0017431	7.65244e-08	330069
2	71605145	rs17749748	G	T	0.56423	-0.0094234	0.0017532	7.67008e-08	330069
5	112185491	rs497844	G	A	0.64726	-0.0093472	0.0017391	7.67008e-08	330069
2	71661422	rs4643565	T	C	0.43527	0.0094234	0.0017533	7.67715e-08	330069
6	130609869	rs11154565	T	G	0.28744	-0.009369	0.0017432	7.68245e-08	330069
7	109720858	rs12673278	T	C	0.057152	-0.0096672	0.0017987	7.68245e-08	330069
1	50329611	rs6663001	T	C	0.55652	0.0095028	0.0017681	7.68776e-08	330069
6	130609585	rs11154563	G	A	0.28737	-0.0093683	0.0017431	7.68776e-08	330069
16	56184240	rs7184813	A	G	0.44865	-0.0093608	0.0017418	7.69308e-08	330069
2	71590611	rs4852254	C	T	0.56464	-0.0094216	0.0017533	7.72325e-08	330069
2	23970720	rs17461695	T	A	0.45162	0.0093724	0.0017442	7.72859e-08	330069
12	112228714	rs440	C	T	0.17273	-0.0093904	0.0017476	7.73215e-08	330069
4	152759741	rs361204	G	T	0.73122	-0.0096037	0.0017874	7.74997e-08	330069
4	152763556	rs361197	G	A	0.73112	-0.009602	0.0017873	7.77857e-08	330069
5	112205298	rs438252	C	A	0.67476	-0.0093243	0.0017356	7.78037e-08	330069
16	56144867	rs8046853	A	G	0.45105	-0.0093547	0.0017413	7.78574e-08	330069
5	112197986	rs431287	T	A	0.66868	-0.0093615	0.0017426	7.79112e-08	330069
1	208016974	rs71635159	A	G	0.087238	0.0091266	0.001699	7.8001e-08	330069
2	76444520	rs59141066	A	G	0.70692	-0.009412	0.0017523	7.81988e-08	330069
9	86639999	rs7039458	A	G	0.74336	-0.0094439	0.0017582	7.82708e-08	330069
16	56292359	rs1424006	A	G	0.558	0.00935	0.0017408	7.83249e-08	330069
12	112340409	rs10849983	T	G	0.18541	-0.0096752	0.0018015	7.84693e-08	330069
18	34525019	rs7230559	C	T	0.67133	0.0094315	0.0017562	7.8614e-08	330069
16	56272290	rs4784647	T	C	0.54665	0.0093515	0.0017413	7.86683e-08	330069
12	112295190	rs10774640	C	T	0.18666	-0.0096496	0.0017969	7.87046e-08	330069
18	34837048	rs1786064	A	G	0.33767	-0.0094633	0.0017622	7.87227e-08	330069
2	24044352	rs35379186	C	T	0.4518	0.0093656	0.0017441	7.88678e-08	330069
2	24044475	rs34525874	G	A	0.4518	0.0093648	0.0017441	7.90861e-08	330069
6	109013930	rs9486916	T	C	0.20872	0.0098017	0.0018255	7.91225e-08	330069
12	112130199	rs659964	C	G	0.15578	-0.0094436	0.0017589	7.91772e-08	330069
17	1274595	rs4790337	G	T	0.082448	-0.0092872	0.0017298	7.91772e-08	330069
6	130609234	rs11154561	G	C	0.28737	-0.0093588	0.0017431	7.92136e-08	330069
5	112198015	rs372492	G	A	0.66893	-0.0093525	0.001742	7.92501e-08	330069
11	46905731	rs61898529	A	G	0.091168	0.0096548	0.0017984	7.94328e-08	330069
4	152759653	rs361203	A	T	0.7312	-0.0095955	0.0017874	7.95243e-08	330069
5	112222694	rs712662	G	C	0.34796	0.0093857	0.0017484	7.96526e-08	330069
2	24061034	rs6719830	C	T	0.45119	0.009364	0.0017445	7.98178e-08	330069
6	130609665	rs11154564	T	C	0.2874	-0.0093559	0.0017432	8.00203e-08	330069
1	97166150	rs17525106	G	A	0.099719	0.0094472	0.0017603	8.01678e-08	330069
2	56496589	rs214045	G	A	0.71297	0.0093094	0.0017346	8.02047e-08	330069
6	130609979	rs4897401	C	T	0.2874	-0.0093547	0.0017432	8.03341e-08	330069
12	112187840	rs11608345	G	A	0.17468	-0.0094107	0.0017539	8.07049e-08	330069
9	86550647	rs7020300	G	A	0.26192	0.0094626	0.0017635	8.07235e-08	330069
12	111737985	rs933306	T	A	0.26098	-0.0098346	0.0018331	8.10588e-08	330069
9	86552049	rs7853254	T	C	0.26759	0.0095748	0.0017849	8.13018e-08	330069
5	112207007	rs2909904	C	G	0.67146	-0.0093355	0.0017403	8.1358e-08	330069
1	97079768	rs56702708	A	G	0.10146	0.0094373	0.0017596	8.17335e-08	330069
2	104433256	rs62151809	T	C	0.43756	-0.0093676	0.0017466	8.17523e-08	330069
16	56262125	rs9302679	G	A	0.54997	0.0093385	0.0017412	8.17711e-08	330069
16	56140597	rs1510187	A	C	0.39723	-0.009333	0.0017402	8.18276e-08	330069
6	130610008	rs4897402	T	G	0.28738	-0.0093483	0.0017432	8.19785e-08	330069
6	130610515	rs12213521	C	T	0.28732	-0.0093483	0.0017432	8.19974e-08	330069
2	104430586	rs952031	T	C	0.43751	-0.0093672	0.0017467	8.20163e-08	330069
16	56283906	rs1382361	G	A	0.54996	0.0093367	0.0017411	8.21107e-08	330069
11	46909112	rs11819969	C	A	0.091167	0.0096418	0.0017981	8.22053e-08	330069
1	50277236	rs12724893	A	G	0.55766	0.0094528	0.0017629	8.22621e-08	330069
1	97365196	rs12027936	C	T	0.093004	0.0093439	0.0017426	8.23e-08	330069
18	34750687	rs2586786	T	C	0.32709	-0.0094039	0.0017538	8.24138e-08	330069
2	59993257	rs4672314	T	A	0.57808	0.0093354	0.0017411	8.25277e-08	330069
2	104412924	rs72820274	A	G	0.40387	-0.0093395	0.001742	8.25848e-08	330069
11	46798230	rs61897302	T	C	0.084469	0.0092422	0.0017238	8.26418e-08	330069
2	104426377	rs17343925	T	G	0.43765	-0.0093643	0.0017466	8.26609e-08	330069
11	45064490	rs1484404	A	G	0.45859	0.009345	0.0017431	8.27752e-08	330069
2	71605131	rs17749725	C	A	0.56426	-0.0093994	0.0017533	8.27752e-08	330069
2	71607539	rs17693408	A	G	0.55129	-0.0094572	0.0017641	8.27942e-08	330069
11	46398916	rs34406563	C	T	0.1917	0.0094904	0.0017703	8.28133e-08	330069
6	130611019	rs12215158	C	T	0.28735	-0.0093449	0.0017432	8.28705e-08	330069
2	71604466	rs17749675	C	A	0.56464	-0.0093986	0.0017533	8.31189e-08	330069
6	130612953	rs12211796	T	G	0.2874	-0.0093436	0.0017431	8.31381e-08	330069
1	97093861	rs61789316	A	G	0.10145	0.009432	0.0017598	8.33489e-08	330069
1	50543816	rs6685278	G	A	0.58229	0.0094725	0.0017674	8.35218e-08	330069
11	46730623	rs61884303	C	G	0.085191	0.0092511	0.0017262	8.36566e-08	330069
16	56264142	rs4784646	A	G	0.55914	0.0093308	0.0017411	8.36566e-08	330069
6	130611120	rs12215220	G	T	0.28735	-0.0093418	0.0017432	8.36758e-08	330069
18	34524398	rs9955016	G	C	0.66796	0.0094091	0.0017558	8.37529e-08	330069
1	49751467	rs7413892	A	C	0.61574	0.0094343	0.0017605	8.37915e-08	330069
9	86568874	rs7045126	G	A	0.26192	0.0094498	0.0017634	8.3888e-08	330069
2	24060141	rs12474547	A	G	0.45172	0.0093465	0.0017442	8.39267e-08	330069
4	152740233	rs2136959	G	A	0.77147	-0.0093602	0.0017468	8.39267e-08	330069
2	24039779	rs2339923	T	C	0.45155	0.0093449	0.0017441	8.42364e-08	330069
12	112235783	rs4646778	A	C	0.17312	-0.0093673	0.0017484	8.43529e-08	330069
1	97083585	rs6673199	G	A	0.10146	0.0094273	0.0017596	8.44112e-08	330069
2	24250822	rs12618943	G	A	0.45847	0.0093419	0.0017438	8.46058e-08	330069
12	112326145	rs2269803	C	T	0.19236	-0.0098952	0.0018472	8.47032e-08	330069
1	209767833	rs9429818	T	C	0.25767	0.0092965	0.0017354	8.47423e-08	330069
9	86559104	rs4147133	T	C	0.26192	0.0094471	0.0017635	8.47423e-08	330069
1	49792287	rs7522609	C	G	0.61555	0.0094285	0.0017601	8.47813e-08	330069
4	152758408	rs361202	C	T	0.73169	-0.0095773	0.0017879	8.48399e-08	330069
9	86570075	rs6559752	T	C	0.26758	0.0095611	0.0017849	8.48399e-08	330069
2	23988899	rs918812	C	T	0.4521	0.0093429	0.0017443	8.49767e-08	330069
9	86553106	rs10114889	C	G	0.26193	0.0094456	0.0017636	8.5153e-08	330069
6	130616670	rs11154568	T	G	0.28751	-0.0093379	0.0017435	8.51726e-08	330069
6	130611343	rs10457546	A	C	0.28733	-0.0093359	0.0017431	8.52315e-08	330069
6	130611355	rs10457547	A	G	0.28733	-0.0093359	0.0017431	8.52315e-08	330069
4	152762072	rs361192	C	G	0.73124	-0.0095726	0.0017874	8.53493e-08	330069
9	86551269	rs6559751	G	A	0.26193	0.0094448	0.0017636	8.5369e-08	330069
1	50008768	rs12735833	T	C	0.55789	0.009442	0.0017631	8.53886e-08	330069
5	112201284	rs463229	A	G	0.67025	-0.0093178	0.0017399	8.5428e-08	330069
12	112228849	rs441	C	T	0.17317	-0.0093634	0.0017485	8.55658e-08	330069
1	97078413	rs75142117	A	G	0.10145	0.0094227	0.0017596	8.55855e-08	330069
16	56229578	rs959935	G	A	0.56267	0.0093218	0.0017408	8.57038e-08	330069
2	76240635	rs386124	C	T	0.73414	-0.0092551	0.0017284	8.57038e-08	330069
2	172901534	rs12989560	A	G	0.6167	0.0094133	0.001758	8.5763e-08	330069
16	56099461	rs8052816	T	C	0.39909	-0.0093167	0.0017401	8.59805e-08	330069
8	4821849	rs4317600	A	G	0.62989	0.0093042	0.0017377	8.60003e-08	330069
7	44808650	rs56077345	C	G	0.069238	-0.0092377	0.0017254	8.60399e-08	330069
9	86554217	rs10115699	T	C	0.26193	0.009442	0.0017636	8.61192e-08	330069
2	71651939	rs12613800	A	T	0.43655	0.0094011	0.001756	8.62184e-08	330069
2	162888055	rs2284871	T	C	0.30175	-0.0093522	0.0017469	8.62581e-08	330069
7	109724397	rs73714049	T	C	0.055838	-0.0095005	0.0017746	8.63376e-08	330069
6	130613121	rs12198283	C	A	0.28736	-0.0093315	0.0017431	8.64172e-08	330069
6	130612859	rs12211647	A	C	0.28735	-0.0093315	0.0017432	8.6457e-08	330069
6	130613044	rs12211753	T	C	0.2874	-0.0093293	0.0017431	8.70362e-08	330069
2	24097389	rs7566727	A	G	0.45181	0.0093347	0.0017443	8.72569e-08	330069
2	104182857	rs10865053	C	T	0.44962	-0.009324	0.0017423	8.73172e-08	330069
12	112344756	rs12426493	C	T	0.18633	-0.0096694	0.0018069	8.73373e-08	330069
6	130609757	rs4897399	G	C	0.28736	-0.0093282	0.0017431	8.73575e-08	330069
2	24093306	rs2339883	A	G	0.45182	0.0093343	0.0017443	8.73776e-08	330069
1	50360066	rs12022125	G	A	0.55816	0.0094339	0.0017629	8.73977e-08	330069
1	97092802	rs67854343	A	T	0.10146	0.0094166	0.0017597	8.73977e-08	330069
7	44860852	rs62460510	C	T	0.07387	-0.0092208	0.0017232	8.75185e-08	330069
12	112281013	rs4767068	G	A	0.18535	-0.0096386	0.0018013	8.7579e-08	330069
12	111719060	rs6490042	A	T	0.25587	-0.0097218	0.0018169	8.77001e-08	330069
2	71539301	rs4852252	C	T	0.55613	-0.0093804	0.0017533	8.7882e-08	330069
5	112212608	rs9011	A	G	0.66455	-0.0093758	0.0017525	8.80238e-08	330069
5	112206816	rs460301	A	G	0.66767	-0.0093565	0.0017491	8.8308e-08	330069
16	56206280	rs35993067	C	T	0.39845	-0.00931	0.0017404	8.84097e-08	330069
1	97363685	rs76712526	A	G	0.093084	0.0093207	0.0017425	8.84912e-08	330069
16	56188427	rs1190654	A	G	0.43864	-0.0093139	0.0017413	8.86543e-08	330069
18	34755673	rs2586785	G	A	0.32733	-0.0093852	0.0017547	8.86952e-08	330069
6	130616311	rs12194120	G	A	0.28742	-0.0093249	0.0017434	8.87156e-08	330069
6	130614229	rs12213922	C	G	0.28745	-0.0093251	0.0017435	8.87973e-08	330069
6	130614457	rs12213950	T	C	0.28746	-0.0093248	0.0017435	8.88587e-08	330069
6	130615248	rs4895876	G	A	0.28746	-0.0093245	0.0017435	8.89611e-08	330069
1	50323833	rs6703701	T	A	0.55811	0.0094282	0.0017629	8.9002e-08	330069
9	86572575	rs2576362	T	G	0.26192	0.0094301	0.0017634	8.91456e-08	330069
4	152763021	rs361195	G	C	0.73117	-0.0095573	0.0017873	8.92689e-08	330069
1	97092428	rs72721907	A	G	0.10146	0.0094096	0.0017597	8.93305e-08	330069
11	46736768	rs61884306	T	C	0.084536	0.009212	0.0017228	8.93923e-08	330069
2	71652473	rs12713749	G	A	0.4366	0.0093885	0.001756	8.97429e-08	330069
7	109729286	rs7805074	G	A	0.056857	-0.0095739	0.0017907	8.98256e-08	330069
11	46714279	rs12274785	C	T	0.30864	0.0094501	0.0017677	8.99498e-08	330069
5	112194032	rs580237	C	A	0.67677	-0.0092884	0.0017377	9.03233e-08	330069
12	112233495	rs78783055	A	G	0.17296	-0.0093408	0.0017475	9.03649e-08	330069
6	130608764	rs2037017	A	G	0.28709	-0.0093176	0.0017432	9.03649e-08	330069
9	86553589	rs3180887	A	G	0.2548	0.0095025	0.0017778	9.03649e-08	330069
2	24066193	rs4233703	G	A	0.44614	0.00932	0.0017439	9.07821e-08	330069
5	112184490	rs2545155	C	T	0.50865	-0.0093433	0.0017483	9.08239e-08	330069
6	130613677	rs12193774	C	T	0.28746	-0.0093177	0.0017435	9.08866e-08	330069
5	112267095	rs149130	A	G	0.47525	0.0093735	0.0017542	9.12011e-08	330069
6	130613916	rs10457550	G	A	0.28746	-0.0093161	0.0017435	9.13482e-08	330069
2	24076136	rs4665641	C	T	0.45185	0.0093196	0.0017442	9.14324e-08	330069
11	46758037	rs3136496	A	G	0.084577	0.0092157	0.0017248	9.14745e-08	330069
1	49743831	rs7546830	G	A	0.61585	0.0094053	0.0017605	9.17487e-08	330069
16	56152145	rs7201312	G	A	0.4385	-0.0093024	0.0017413	9.18333e-08	330069
2	104237468	rs2167539	T	C	0.44842	-0.0093092	0.0017426	9.18967e-08	330069
1	50110070	rs1578800	G	A	0.55637	0.0094464	0.0017683	9.1939e-08	330069
2	24018480	rs13009582	A	G	0.45158	0.0093186	0.0017444	9.2045e-08	330069
16	56149540	rs11645713	G	C	0.43828	-0.0093009	0.0017412	9.21722e-08	330069
6	130609889	rs4897400	A	T	0.28755	-0.0093115	0.0017432	9.21722e-08	330069
6	130608039	rs12202260	A	C	0.28693	-0.0093088	0.0017427	9.22571e-08	330069
1	49902421	rs12037603	T	C	0.55771	0.0094158	0.0017628	9.23634e-08	330069
9	86594798	rs796004	T	C	0.26314	0.0094037	0.0017606	9.23847e-08	330069
9	86595070	rs296887	T	C	0.26314	0.0094037	0.0017606	9.23847e-08	330069
2	24093475	rs11125284	G	A	0.4518	0.0093165	0.0017443	9.2406e-08	330069
1	50318398	rs12031362	C	T	0.55635	0.0094437	0.0017681	9.24485e-08	330069
11	46751848	rs3136480	G	T	0.084891	0.0092141	0.0017252	9.26403e-08	330069
11	46743135	rs3136439	C	T	0.084795	0.0092117	0.0017249	9.28753e-08	330069
1	50108474	rs12030579	G	A	0.55858	0.0094157	0.0017632	9.28966e-08	330069
11	46752958	rs3136482	C	T	0.084899	0.0092132	0.0017253	9.29394e-08	330069
11	46834251	rs61897308	A	G	0.084459	0.009205	0.0017239	9.31108e-08	330069
11	46742249	rs3136434	C	T	0.084798	0.0092106	0.001725	9.32395e-08	330069
5	112244777	rs469760	A	G	0.32846	0.0093086	0.0017435	9.34329e-08	330069
9	86598190	rs296893	T	C	0.26247	0.0093889	0.0017586	9.35621e-08	330069
6	130614335	rs12194113	C	T	0.28746	-0.009307	0.0017435	9.40373e-08	330069
6	130616362	rs12207587	T	C	0.28758	-0.0093063	0.0017435	9.41456e-08	330069
2	104160826	rs1451975	A	G	0.44965	-0.0093003	0.0017424	9.41673e-08	330069
11	46749648	rs5898	A	G	0.084896	0.0092084	0.0017252	9.43192e-08	330069
6	130616406	rs12194184	T	A	0.28752	-0.009305	0.0017435	9.45802e-08	330069
2	24076632	rs7590252	C	T	0.45133	0.0093098	0.0017445	9.47982e-08	330069
1	50356058	rs6588367	C	G	0.55819	0.0094078	0.0017629	9.482e-08	330069
2	24085413	rs4665242	T	C	0.45201	0.0093081	0.0017442	9.482e-08	330069
7	109748344	rs10265227	A	C	0.057856	-0.0096289	0.0018044	9.48418e-08	330069
11	46752659	rs3136481	T	G	0.084883	0.0092064	0.0017252	9.48855e-08	330069
12	112883476	rs11066309	A	G	0.39291	0.0093401	0.0017504	9.50605e-08	330069
11	46741908	rs3136433	A	C	0.084788	0.0092037	0.0017249	9.52357e-08	330069
11	46742489	rs3136436	G	A	0.08479	0.0092036	0.0017249	9.52796e-08	330069
11	46743334	rs3136443	C	T	0.084768	0.0092035	0.0017249	9.53235e-08	330069
7	109727085	rs73714050	A	C	0.055827	-0.0094624	0.001774	9.60948e-08	330069
11	46885016	rs56331152	T	C	0.091505	0.0095852	0.001797	9.62055e-08	330069
7	109744564	rs60019161	A	G	0.057925	-0.0096301	0.0018055	9.62498e-08	330069
7	109744143	rs61054869	T	G	0.057801	-0.0096187	0.0018034	9.6272e-08	330069
1	97102450	rs2132425	A	G	0.10014	0.0093903	0.0017607	9.64495e-08	330069
6	130616709	rs4897407	C	T	0.28749	-0.009298	0.0017435	9.66496e-08	330069
1	209766809	rs11576233	A	G	0.25753	0.0092547	0.0017354	9.66718e-08	330069
11	46743432	rs3136521	A	G	0.0848	0.0091989	0.001725	9.67832e-08	330069
4	152763180	rs361196	C	T	0.73124	-0.009531	0.0017873	9.68947e-08	330069
11	46735956	rs61884305	G	A	0.084714	0.0091959	0.0017246	9.7051e-08	330069
16	56292121	rs2169800	T	C	0.56452	0.0092786	0.0017402	9.72076e-08	330069
1	50269776	rs4272667	T	C	0.55621	0.0094283	0.0017683	9.72747e-08	330069
9	86595571	rs296889	A	G	0.26313	0.0093871	0.0017606	9.73195e-08	330069
2	24190263	rs4665251	C	A	0.45269	0.0092978	0.0017439	9.74541e-08	330069
11	46887384	rs16938534	C	T	0.091472	0.0095811	0.0017971	9.75439e-08	330069
2	24110611	rs17762465	C	G	0.45192	0.0092985	0.0017443	9.78138e-08	330069
7	109729958	rs35220313	G	C	0.057079	-0.0095658	0.0017946	9.80393e-08	330069
11	46900280	rs7945548	G	A	0.091676	0.0095783	0.001797	9.81974e-08	330069
11	46750064	rs3136472	G	C	0.084857	0.0091956	0.0017252	9.822e-08	330069
17	43883103	rs2664008	A	G	0.10609	-0.0091088	0.001709	9.83105e-08	330069
1	209766058	rs11119312	A	T	0.25845	0.0092477	0.0017351	9.84918e-08	330069
9	76904578	rs921798	G	T	0.6658	0.0093986	0.0017635	9.85145e-08	330069
1	50352291	rs6588366	C	G	0.56376	0.0093511	0.0017546	9.85598e-08	330069
2	104380545	rs506466	T	C	0.54681	0.0092893	0.0017432	9.88781e-08	330069
11	46749246	rs3136468	C	T	0.084887	0.0091931	0.0017252	9.8992e-08	330069
2	172915489	rs788166	C	G	0.62831	0.0093169	0.0017485	9.91288e-08	330069
11	46889719	rs12273360	C	T	0.091472	0.0095755	0.0017971	9.91745e-08	330069
11	46723603	rs10769205	A	G	0.68776	-0.0095079	0.0017845	9.93574e-08	330069
1	209765087	rs7528698	C	A	0.25847	0.009244	0.0017352	9.96782e-08	330069
2	76404615	rs13428930	G	A	0.70123	-0.0093503	0.0017551	9.97011e-08	330069
11	46722221	rs7932354	C	T	0.68774	-0.0095055	0.0017845	1.00069e-07	330069
11	46732891	rs61884304	G	T	0.084719	0.009186	0.0017246	1.00207e-07	330069
7	109726507	rs12538565	G	A	0.056771	-0.0095297	0.0017892	1.003e-07	330069
9	86595731	rs296890	A	C	0.26307	0.0093765	0.0017605	1.00392e-07	330069
1	183388259	rs12074508	C	T	0.45157	-0.009289	0.0017441	1.00415e-07	330069
2	104423042	rs4347858	C	T	0.43758	-0.0093028	0.0017467	1.00415e-07	330069
6	130613000	rs12211846	A	G	0.2875	-0.0092838	0.0017431	1.00462e-07	330069
11	46759571	rs3136505	G	A	0.30168	0.0093384	0.0017535	1.00693e-07	330069
12	111764462	rs4523744	G	C	0.25833	-0.0096693	0.0018157	1.00786e-07	330069
12	112230036	rs4646777	A	G	0.17257	-0.0093056	0.0017474	1.00856e-07	330069
2	24104973	rs2176264	C	T	0.45196	0.0092886	0.0017443	1.00995e-07	330069
2	172905817	rs34054371	C	G	0.62869	0.0093092	0.0017482	1.01088e-07	330069
12	111739500	rs11065857	G	A	0.26041	-0.0097358	0.0018284	1.01158e-07	330069
2	24115460	rs1980164	C	G	0.45194	0.0092874	0.0017443	1.01391e-07	330069
9	86595498	rs296888	A	G	0.26258	0.009364	0.0017587	1.01391e-07	330069
5	112191642	rs434157	A	G	0.68213	-0.0092368	0.0017349	1.01555e-07	330069
9	86617265	rs1982151	G	A	0.737	-0.0093722	0.0017605	1.01765e-07	330069
1	209760936	rs7532726	C	A	0.25878	0.0092351	0.001735	1.02235e-07	330069
9	76891671	rs10869375	C	A	0.67779	0.0093408	0.0017549	1.02259e-07	330069
2	24605032	rs11695528	A	G	0.61262	0.0092694	0.0017415	1.02329e-07	330069
2	24227450	rs4665651	A	G	0.45225	0.0092825	0.001744	1.02376e-07	330069
16	56293063	rs730300	C	T	0.56511	0.0092636	0.0017404	1.024e-07	330069
1	50115480	rs1343162	T	C	0.55795	0.0093841	0.0017631	1.02447e-07	330069
1	97170089	rs12035225	T	G	0.09635	0.0092477	0.0017375	1.02447e-07	330069
9	76907397	rs1902163	G	C	0.66783	0.0093425	0.0017555	1.02754e-07	330069
5	112218982	rs1069061	G	A	0.32156	0.009231	0.0017348	1.03252e-07	330069
7	109728789	rs7784037	C	T	0.056956	-0.009539	0.0017928	1.03348e-07	330069
7	109749671	rs73419009	G	A	0.057961	-0.0096078	0.0018058	1.03562e-07	330069
2	24071170	rs34416396	T	C	0.45171	0.0092797	0.0017442	1.03586e-07	330069
1	209764618	rs35913818	A	T	0.25841	0.009232	0.0017352	1.03657e-07	330069
2	24597622	rs6709271	G	C	0.62372	0.0092708	0.0017426	1.03777e-07	330069
1	209764250	rs713075	A	C	0.25747	0.0092327	0.0017355	1.03825e-07	330069
1	50277009	rs17379721	C	T	0.55652	0.009408	0.0017685	1.0392e-07	330069
18	40940007	rs62090662	G	A	0.14549	0.0092385	0.0017367	1.0404e-07	330069
18	40932006	rs16977484	C	A	0.1457	0.0092531	0.0017395	1.04232e-07	330069
2	24598279	rs7577964	G	A	0.62371	0.0092691	0.0017426	1.04328e-07	330069
5	111982773	rs11956702	C	G	0.25262	0.0092984	0.0017481	1.044e-07	330069
11	45064211	rs10838408	C	T	0.54156	-0.0092718	0.0017432	1.04448e-07	330069
18	34758343	rs2847592	C	G	0.32737	-0.0093326	0.0017547	1.04544e-07	330069
6	130612188	rs4897406	T	G	0.28761	-0.0092715	0.0017432	1.04616e-07	330069
1	97100996	rs17115571	G	A	0.10025	0.0093682	0.0017615	1.04809e-07	330069
11	46758383	rs3136500	T	C	0.084629	0.0091729	0.0017248	1.04833e-07	330069
6	130613384	rs12198460	G	A	0.28768	-0.0092699	0.0017434	1.0556e-07	330069
2	172912098	rs1008151	A	G	0.61778	0.0093526	0.001759	1.05584e-07	330069
1	49772014	rs12030700	G	A	0.61776	0.0093402	0.0017567	1.05633e-07	330069
2	104421850	rs6741157	T	C	0.43748	-0.0092866	0.0017467	1.05755e-07	330069
1	50306257	rs4363466	G	A	0.55665	0.0094014	0.0017683	1.05828e-07	330069
2	24082868	rs13020789	C	T	0.45192	0.0092728	0.0017442	1.05925e-07	330069
10	63671348	rs2393781	C	T	0.45027	0.0092521	0.0017404	1.06047e-07	330069
11	46883318	rs11039012	C	A	0.90797	-0.0095929	0.0018046	1.0617e-07	330069
2	24109230	rs4665245	C	T	0.45197	0.0092722	0.0017443	1.06341e-07	330069
19	4071814	rs7256295	A	G	0.2257	-0.0094383	0.0017756	1.06365e-07	330069
7	109750399	rs7786283	T	A	0.05796	-0.009598	0.0018057	1.06561e-07	330069
2	104296940	rs264939	C	G	0.55177	0.0092679	0.0017437	1.06586e-07	330069
1	50185075	rs11205641	G	A	0.55869	0.0093705	0.0017632	1.06955e-07	330069
18	34836286	rs1786065	G	A	0.34218	-0.0093647	0.0017621	1.07053e-07	330069
1	209765468	rs7541562	A	G	0.25847	0.0092212	0.0017352	1.07127e-07	330069
2	24129330	rs4665644	A	T	0.45201	0.0092697	0.0017444	1.07275e-07	330069
1	49797804	rs17534292	G	A	0.61616	0.0093532	0.0017601	1.07349e-07	330069
1	50215148	rs72686739	A	C	0.55801	0.0093688	0.0017632	1.07547e-07	330069
7	44922737	rs56066170	C	T	0.068584	-0.0091565	0.0017234	1.0782e-07	330069
6	130605278	rs1966965	A	G	0.29196	-0.0093052	0.0017514	1.07944e-07	330069
9	86595801	rs796003	T	G	0.26304	0.009353	0.0017605	1.08044e-07	330069
11	46891901	rs7112060	T	C	0.091486	0.0095476	0.0017971	1.08094e-07	330069
1	49796025	rs1845464	G	A	0.61643	0.0093483	0.0017598	1.08468e-07	330069
2	71562503	rs17743415	C	T	0.55216	-0.0093704	0.001764	1.08468e-07	330069
11	46758882	rs3136504	T	C	0.084655	0.0091604	0.0017248	1.09119e-07	330069
11	46723937	rs12361673	A	G	0.68778	-0.0094774	0.0017845	1.09144e-07	330069
15	47909494	rs17378980	T	A	0.23409	0.0091767	0.0017279	1.09219e-07	330069
1	49784750	rs6698947	G	T	0.61666	0.0093483	0.0017603	1.09345e-07	330069
5	112257251	rs153558	T	C	0.34171	0.0092253	0.0017376	1.10078e-07	330069
1	183394037	rs12731807	T	G	0.45026	-0.0092659	0.0017453	1.10332e-07	330069
9	86574568	rs2780103	T	C	0.25996	0.0093343	0.0017582	1.10332e-07	330069
6	97947755	rs10499014	G	C	0.26477	-0.0092283	0.0017383	1.10382e-07	330069
9	76907191	rs2376055	G	A	0.66535	0.0093601	0.0017634	1.10892e-07	330069
2	59977645	rs17050409	A	G	0.17109	0.0092619	0.0017449	1.10917e-07	330069
5	112197637	rs712668	G	T	0.67024	-0.0092344	0.0017398	1.11045e-07	330069
12	112222788	rs4648328	T	C	0.172	-0.0092785	0.0017482	1.11173e-07	330069
1	209762875	rs11587591	G	A	0.26107	0.0092185	0.0017369	1.11353e-07	330069
2	71651597	rs7593986	G	C	0.44725	0.0092985	0.001752	1.11353e-07	330069
12	112173448	rs847900	G	A	0.17793	-0.0096096	0.0018107	1.11481e-07	330069
12	111764533	rs4512914	C	T	0.25924	-0.0096633	0.0018209	1.11558e-07	330069
9	76906107	rs4612420	T	C	0.66532	0.0093588	0.0017635	1.11609e-07	330069
2	172921832	rs788171	C	T	0.62829	0.0092765	0.0017483	1.12021e-07	330069
9	76905048	rs3953842	T	C	0.6679	0.0093133	0.0017555	1.12668e-07	330069
11	46901574	rs11825434	C	T	0.09163	0.0095335	0.001797	1.12694e-07	330069
2	24143675	rs35324570	G	A	0.45208	0.0092527	0.0017443	1.13058e-07	330069
17	50333405	rs34706544	G	A	0.33785	0.0092028	0.0017354	1.14051e-07	330069
5	112232228	rs455469	T	A	0.32921	0.009244	0.0017434	1.14525e-07	330069
2	104190846	rs11885577	A	G	0.44966	-0.0092398	0.0017427	1.14657e-07	330069
6	130607571	rs4897398	A	T	0.29086	-0.0092729	0.0017493	1.15266e-07	330069
1	50292926	rs11581677	T	C	0.55632	0.0093743	0.0017686	1.15585e-07	330069
9	76907688	rs1026381	T	C	0.66531	0.0093469	0.0017635	1.15824e-07	330069
2	24182159	rs12151849	T	C	0.45361	0.0092393	0.0017434	1.16091e-07	330069
2	24187777	rs6723491	A	G	0.4525	0.0092406	0.0017438	1.16493e-07	330069
4	143338479	rs113318338	C	T	0.0015184	0.0090911	0.0017158	1.16815e-07	330069
11	46755653	rs3136489	A	T	0.085203	0.0091403	0.0017252	1.17031e-07	330069
1	49799193	rs12407305	C	T	0.61627	0.0093241	0.0017601	1.17571e-07	330069
2	104469422	rs2945452	T	A	0.5288	0.009282	0.0017523	1.17733e-07	330069
1	209767709	rs12144092	C	A	0.25951	0.0091923	0.0017355	1.17951e-07	330069
6	130603118	rs2089997	C	T	0.2908	-0.0092678	0.0017499	1.18331e-07	330069
1	50243541	rs11584742	T	C	0.55602	0.0093636	0.0017681	1.18577e-07	330069
2	104266248	rs1673467	G	C	0.55109	0.009227	0.0017426	1.19097e-07	330069
9	86559213	rs4147132	C	T	0.26028	0.0093125	0.0017588	1.19234e-07	330069
6	130601474	rs12199419	A	G	0.29074	-0.009264	0.0017499	1.19784e-07	330069
1	97098716	rs72721911	A	T	0.09707	0.009198	0.0017375	1.1984e-07	330069
1	50221366	rs12735035	C	A	0.55878	0.0093336	0.0017631	1.19895e-07	330069
1	97098696	rs72721909	A	G	0.097083	0.0091979	0.0017375	1.19895e-07	330069
12	112939853	rs3741983	T	C	0.19721	-0.0097974	0.0018508	1.19922e-07	330069
11	46870322	rs12277006	A	G	0.090934	0.0094682	0.0017887	1.20116e-07	330069
2	71678520	rs4852257	G	T	0.56795	-0.0092835	0.0017538	1.20226e-07	330069
6	130602789	rs1849526	C	T	0.2908	-0.0092618	0.0017499	1.20531e-07	330069
17	70912339	rs12103754	T	C	0.26893	0.0092892	0.0017551	1.20559e-07	330069
6	130602409	rs4895873	A	T	0.29081	-0.0092615	0.0017499	1.20642e-07	330069
2	24193409	rs10865250	G	T	0.45241	0.0092294	0.0017438	1.20698e-07	330069
2	76410330	rs34533269	T	G	0.17823	0.0091374	0.0017265	1.20698e-07	330069
6	130603224	rs2089998	C	A	0.29083	-0.0092615	0.0017499	1.20726e-07	330069
6	108944165	rs3813498	T	C	0.80197	-0.0094767	0.0017906	1.20754e-07	330069
11	46897792	rs7115038	G	C	0.90771	-0.0095481	0.0018042	1.20921e-07	330069
2	76413306	rs2177499	T	A	0.1801	0.0091322	0.0017259	1.21563e-07	330069
11	45052398	rs10838405	T	C	0.43242	0.0092342	0.0017453	1.21703e-07	330069
1	97085353	rs4144139	T	C	0.098114	0.0091911	0.0017373	1.22152e-07	330069
11	46749234	rs3136467	A	G	0.085017	0.0091249	0.0017253	1.23169e-07	330069
9	86626769	rs10868080	A	T	0.73729	-0.0093102	0.0017603	1.23169e-07	330069
2	172919958	rs788170	C	T	0.62822	0.0092476	0.0017485	1.23225e-07	330069
1	50058576	rs4926825	C	T	0.55647	0.009352	0.0017683	1.23339e-07	330069
6	130601780	rs12214250	G	A	0.29078	-0.0092536	0.0017499	1.23709e-07	330069
6	130613535	rs12198515	G	A	0.28762	-0.0092194	0.0017435	1.23823e-07	330069
2	24186801	rs4665648	G	C	0.45254	0.0092206	0.0017438	1.24022e-07	330069
2	24184710	rs11125332	T	C	0.45261	0.00922	0.0017438	1.2428e-07	330069
6	109019606	rs531111	C	T	0.18147	0.0092914	0.0017573	1.2428e-07	330069
9	76890086	rs10869372	C	T	0.67744	0.0092828	0.001756	1.24853e-07	330069
2	76417586	rs7570039	T	A	0.70122	-0.0093153	0.0017623	1.25141e-07	330069
2	76410327	rs34389781	G	A	0.18123	0.009179	0.0017365	1.25228e-07	330069
2	104226989	rs58177455	C	T	0.45026	-0.0092105	0.0017427	1.25632e-07	330069
18	34784138	rs2586793	T	C	0.32652	-0.0092911	0.001758	1.25719e-07	330069
6	130601622	rs12200688	T	C	0.29079	-0.0092483	0.0017499	1.25777e-07	330069
11	46897865	rs11039015	T	C	0.90777	-0.009534	0.0018042	1.26241e-07	330069
2	104377598	rs520351	G	C	0.54831	0.0092118	0.0017433	1.26386e-07	330069
2	24197402	rs35631101	A	G	0.45249	0.0092143	0.0017438	1.26445e-07	330069
11	46864705	rs11824327	C	T	0.091541	0.0094957	0.0017971	1.26503e-07	330069
6	130601548	rs12199323	A	C	0.29078	-0.0092462	0.0017499	1.26561e-07	330069
18	67191423	rs17793051	A	T	0.20147	0.0091055	0.0017234	1.26853e-07	330069
2	24179922	rs4665250	G	A	0.45261	0.0092134	0.0017438	1.26882e-07	330069
16	56246370	rs1997514	T	A	0.56065	0.0091982	0.0017412	1.27292e-07	330069
11	46877082	rs7938960	C	T	0.091577	0.0094926	0.001797	1.27614e-07	330069
6	130605086	rs1471441	A	C	0.29022	-0.0092374	0.0017488	1.2785e-07	330069
11	46870593	rs60940896	C	T	0.091558	0.0094901	0.001797	1.2844e-07	330069
2	24196272	rs4665650	C	G	0.45249	0.0092078	0.0017438	1.29092e-07	330069
2	24196180	rs4665649	T	C	0.45249	0.0092073	0.0017438	1.2933e-07	330069
2	76412906	rs1554616	C	T	0.70017	-0.0092687	0.0017562	1.30888e-07	330069
6	130601228	rs11154559	T	C	0.29078	-0.0092349	0.00175	1.31341e-07	330069
2	24184620	rs11125331	T	G	0.45263	0.0092019	0.0017438	1.31553e-07	330069
6	130607703	rs12333039	A	G	0.28979	-0.0092188	0.0017471	1.31613e-07	330069
11	46875933	rs6485700	A	G	0.90788	-0.0095211	0.0018045	1.31917e-07	330069
5	112274827	rs153569	C	T	0.47501	0.0092551	0.0017541	1.32008e-07	330069
6	130606808	rs1849527	T	G	0.29024	-0.0092255	0.0017488	1.32617e-07	330069
5	112221869	rs818427	T	C	0.32474	0.0091551	0.0017355	1.32648e-07	330069
2	104204310	rs10171837	C	T	0.44953	-0.0091911	0.0017427	1.33506e-07	330069
6	130601541	rs12206502	C	T	0.29077	-0.0092292	0.0017499	1.33506e-07	330069
1	50080280	rs12744549	C	G	0.5578	0.0093024	0.001764	1.3406e-07	330069
6	130603958	rs11154560	A	G	0.29085	-0.0092274	0.0017499	1.34215e-07	330069
6	130604428	rs7765872	T	A	0.29085	-0.0092249	0.0017499	1.35332e-07	330069
1	50243854	rs3899856	G	T	0.61594	0.0092807	0.0017606	1.35457e-07	330069
12	111833788	rs10774624	A	G	0.53266	-0.0092929	0.0017633	1.3627e-07	330069
2	104469564	rs2678670	T	A	0.52957	0.009235	0.0017523	1.36301e-07	330069
13	58402553	rs1334289	G	A	0.42219	-0.0091796	0.001742	1.36773e-07	330069
1	97092253	rs72721906	A	T	0.098091	0.0091538	0.0017372	1.37057e-07	330069
3	23521061	rs9862557	G	A	0.3428	0.0092597	0.0017577	1.37943e-07	330069
2	174997017	rs10930640	T	C	0.47663	0.0092086	0.001748	1.38007e-07	330069
7	144162036	rs566321594	T	C	0.00055086	0.0087543	0.0016618	1.38038e-07	330069
11	46808600	rs7105052	C	T	0.090896	0.0094239	0.0017889	1.3807e-07	330069
1	50245509	rs6695041	G	A	0.6159	0.0092738	0.0017606	1.38357e-07	330069
12	10834865	rs10845202	T	C	0.4333	-0.0091664	0.0017403	1.3858e-07	330069
11	46803700	rs57485117	G	C	0.091486	0.0094616	0.0017966	1.39316e-07	330069
11	46796683	rs7111811	C	A	0.091547	0.0094628	0.0017972	1.40088e-07	330069
2	76423364	rs7565818	T	C	0.18282	0.0091062	0.0017298	1.40799e-07	330069
7	44811221	rs73109480	T	C	0.06932	-0.0090851	0.0017258	1.40799e-07	330069
2	56457718	rs56265195	G	C	0.40242	0.0091885	0.0017456	1.41156e-07	330069
13	58461076	rs9537847	A	T	0.56937	0.0091964	0.0017471	1.41286e-07	330069
11	46794848	rs7947517	G	A	0.091554	0.0094593	0.0017973	1.41645e-07	330069
6	130604511	rs7766039	G	A	0.29084	-0.0092098	0.0017499	1.41808e-07	330069
1	49897328	rs1527830	T	A	0.615	0.0092666	0.0017607	1.41873e-07	330069
5	112250198	rs193527	T	C	0.32153	0.0091532	0.0017393	1.42102e-07	330069
11	46809210	rs61897304	G	A	0.091552	0.009458	0.0017973	1.422e-07	330069
11	46755464	rs3136487	G	A	0.082543	0.0090691	0.0017234	1.42364e-07	330069
11	46800460	rs61897303	G	A	0.091549	0.0094575	0.0017972	1.42364e-07	330069
6	130604730	rs7770566	A	G	0.29081	-0.0092076	0.0017498	1.42561e-07	330069
11	46814785	rs73456126	G	A	0.091576	0.0094566	0.0017973	1.43021e-07	330069
1	50260630	rs6695948	C	T	0.55892	0.0092773	0.0017634	1.43417e-07	330069
13	58406123	rs6650396	G	A	0.42244	-0.0091633	0.001742	1.43913e-07	330069
2	104201593	rs2060818	A	G	0.45017	-0.0091642	0.0017423	1.44145e-07	330069
1	205799987	rs1772143	A	T	0.39866	0.0091791	0.0017451	1.44178e-07	330069
11	46830575	rs7123729	C	T	0.091543	0.0094531	0.0017972	1.44278e-07	330069
11	46830847	rs7108147	A	G	0.091543	0.009453	0.0017972	1.44311e-07	330069
13	58400298	rs9527705	A	T	0.42266	-0.0091595	0.0017417	1.44844e-07	330069
6	97886478	rs67506144	T	C	0.26544	-0.00914	0.001738	1.45077e-07	330069
11	47237359	rs4647709	T	C	0.087574	0.009031	0.0017174	1.45412e-07	330069
6	97890588	rs35358580	T	C	0.26546	-0.0091376	0.001738	1.46117e-07	330069
6	130601380	rs12212688	C	A	0.29073	-0.0092002	0.0017499	1.4615e-07	330069
6	130607914	rs28614013	T	C	0.28655	-0.0091616	0.0017428	1.46656e-07	330069
13	58417572	rs9527713	G	T	0.42191	-0.0091579	0.0017421	1.4669e-07	330069
11	46792695	rs11038987	T	A	0.092153	0.0094884	0.001805	1.46724e-07	330069
12	49416944	rs10875912	C	T	0.36071	0.0091541	0.0017414	1.46724e-07	330069
7	109710535	rs17157374	C	T	0.056035	-0.0093363	0.0017761	1.46724e-07	330069
1	50382997	rs11485576	A	T	0.61568	0.0092541	0.0017607	1.47265e-07	330069
1	50161291	rs12735229	G	A	0.5562	0.0092928	0.0017681	1.47503e-07	330069
13	58405488	rs7986688	G	A	0.42242	-0.0091555	0.001742	1.47537e-07	330069
2	76412056	rs6717054	G	A	0.69999	-0.0092293	0.0017561	1.47639e-07	330069
7	109767945	rs75423780	T	C	0.058065	-0.0093249	0.0017745	1.48047e-07	330069
16	56289571	rs9302681	T	G	0.55688	0.0091497	0.0017411	1.48081e-07	330069
2	174983510	rs4368295	A	G	0.47774	0.0091895	0.0017488	1.48252e-07	330069
2	174973726	rs17239055	G	A	0.40084	0.0092051	0.0017518	1.48354e-07	330069
11	46828273	rs7111760	C	T	0.091575	0.0094433	0.0017972	1.48525e-07	330069
18	34798582	rs323486	G	A	0.33186	-0.0092406	0.0017588	1.4897e-07	330069
2	24168188	rs60490158	A	G	0.45237	0.0091618	0.001744	1.49417e-07	330069
2	76413692	rs1533986	G	A	0.18155	0.0090702	0.0017266	1.49486e-07	330069
11	46833092	rs7102474	C	T	0.091525	0.0094405	0.0017972	1.49796e-07	330069
2	172900948	rs12987931	T	C	0.60565	0.0092234	0.001756	1.5021e-07	330069
2	174993394	rs10203430	G	A	0.47671	0.009181	0.001748	1.50245e-07	330069
13	58401702	rs9569760	C	T	0.4224	-0.0091496	0.001742	1.5028e-07	330069
1	50068312	rs35524072	G	A	0.55841	0.0092605	0.0017631	1.50314e-07	330069
1	50164531	rs1343165	G	A	0.5584	0.0092602	0.0017632	1.50557e-07	330069
11	46818043	rs56311746	T	A	0.091561	0.0094368	0.001797	1.51078e-07	330069
11	46873406	rs61898463	G	A	0.091642	0.0094355	0.0017968	1.51147e-07	330069
2	24167268	rs7558300	T	C	0.45235	0.0091577	0.0017439	1.51252e-07	330069
1	50170873	rs7527797	A	G	0.55627	0.0092853	0.0017683	1.51321e-07	330069
5	112182691	rs448162	G	A	0.61292	-0.0092422	0.0017601	1.51356e-07	330069
17	70913648	rs17780850	A	G	0.26664	0.0092069	0.0017534	1.51391e-07	330069
13	58455439	rs1595216	A	G	0.4216	-0.0091471	0.0017421	1.5167e-07	330069
7	44910682	rs12616494	T	G	0.068461	-0.0090491	0.0017235	1.51915e-07	330069
7	44914251	rs62460529	C	T	0.068461	-0.009049	0.0017235	1.5195e-07	330069
2	76411833	rs35516376	A	G	0.18178	0.0090632	0.0017262	1.51985e-07	330069
1	50038262	rs1856297	C	T	0.55867	0.0092569	0.0017632	1.52055e-07	330069
7	44912066	rs62460528	A	G	0.068465	-0.0090486	0.0017235	1.52125e-07	330069
9	76890773	rs11143891	C	G	0.67569	0.0092417	0.0017605	1.52721e-07	330069
13	58458165	rs3912035	T	C	0.42707	-0.0091446	0.0017422	1.53073e-07	330069
11	46844849	rs59197251	T	C	0.091467	0.0094318	0.001797	1.53285e-07	330069
13	58403761	rs9527707	A	G	0.42215	-0.0091428	0.001742	1.53462e-07	330069
2	76465046	rs12470208	T	C	0.54202	-0.0092047	0.001754	1.53957e-07	330069
13	58428271	rs1370055	G	C	0.42166	-0.0091405	0.0017422	1.54989e-07	330069
12	111753808	rs10849931	C	T	0.23643	-0.0097187	0.0018524	1.5506e-07	330069
2	24164129	rs4488614	A	G	0.45345	0.0091466	0.0017435	1.55489e-07	330069
13	58458789	rs9527722	C	A	0.4216	-0.0091384	0.0017421	1.5574e-07	330069
7	44908078	rs62460527	T	C	0.068487	-0.0090401	0.0017235	1.56279e-07	330069
1	50023956	rs2178085	T	C	0.5573	0.0092478	0.0017631	1.56315e-07	330069
2	76412510	rs35690432	T	A	0.18314	0.009072	0.0017296	1.56387e-07	330069
9	76890267	rs10869373	C	A	0.67448	0.0092599	0.0017657	1.57e-07	330069
1	50359987	rs10888672	A	G	0.61581	0.0092331	0.0017606	1.57072e-07	330069
1	50004051	rs12741589	G	A	0.55624	0.0092718	0.0017683	1.57725e-07	330069
9	76890310	rs10869374	C	T	0.67446	0.0092583	0.0017657	1.57797e-07	330069
11	46857059	rs12287376	T	C	0.091505	0.0094228	0.0017971	1.5787e-07	330069
11	46729872	rs57804402	C	T	0.30999	0.0093	0.0017738	1.58234e-07	330069
13	58405903	rs6650395	C	T	0.42164	-0.0091321	0.0017422	1.59148e-07	330069
7	44899376	rs62460524	A	T	0.068451	-0.0090342	0.0017235	1.59184e-07	330069
13	58440827	rs9527717	C	T	0.42165	-0.0091316	0.0017421	1.59221e-07	330069
13	58414114	rs2065643	C	A	0.42168	-0.0091312	0.0017422	1.59588e-07	330069
2	56461906	rs1861772	G	T	0.40342	0.0091493	0.0017457	1.59809e-07	330069
13	58436859	rs35138115	C	T	0.42167	-0.0091306	0.0017422	1.59882e-07	330069
7	44911023	rs188203968	A	G	0.068473	-0.0090326	0.0017235	1.59993e-07	330069
7	44915785	rs56381811	T	A	0.068447	-0.009032	0.0017235	1.60177e-07	330069
11	46809382	rs9735937	A	G	0.09218	0.0094585	0.0018049	1.60361e-07	330069
13	58431148	rs9563547	T	C	0.42164	-0.0091296	0.0017422	1.60361e-07	330069
12	112610714	rs11066188	A	G	0.39262	0.0091719	0.0017504	1.6062e-07	330069
4	89466335	rs11932693	A	G	0.16736	0.0091307	0.0017427	1.61102e-07	330069
12	111752211	rs11065861	G	A	0.2366	-0.0097126	0.0018537	1.61139e-07	330069
12	111755178	rs10774617	C	T	0.23649	-0.0097058	0.0018525	1.61324e-07	330069
1	50237300	rs11488179	G	C	0.61628	0.0092255	0.001761	1.61659e-07	330069
10	63669379	rs4948290	C	T	0.44942	0.0091185	0.0017406	1.61696e-07	330069
10	63669222	rs56157892	G	C	0.44696	0.0091244	0.0017419	1.62218e-07	330069
13	58366678	rs9527697	C	T	0.42184	-0.0091244	0.001742	1.62517e-07	330069
11	46806553	rs11822959	T	C	0.092277	0.0094627	0.0018068	1.63005e-07	330069
5	112194693	rs429427	G	A	0.6634	-0.0091258	0.0017425	1.63042e-07	330069
11	46828895	rs7129622	G	A	0.092148	0.0094507	0.0018048	1.63795e-07	330069
13	58364669	rs9537802	C	G	0.42183	-0.009122	0.001742	1.63795e-07	330069
11	46829174	rs7115986	A	T	0.09173	0.0094228	0.0017995	1.63908e-07	330069
11	46842841	rs7106323	A	C	0.091543	0.0094086	0.0017969	1.64097e-07	330069
2	104214676	rs10185399	T	A	0.44981	-0.0091244	0.0017427	1.64286e-07	330069
2	59988128	rs60154737	A	G	0.21167	0.0090274	0.0017242	1.64551e-07	330069
11	46730329	rs4752929	G	A	0.31167	0.0093311	0.0017823	1.64589e-07	330069
13	58395377	rs1001981	C	T	0.42194	-0.0091199	0.0017421	1.65082e-07	330069
13	58404186	rs8001984	G	A	0.42161	-0.0091201	0.0017422	1.65196e-07	330069
13	58382657	rs9527701	T	C	0.4219	-0.0091192	0.0017421	1.65348e-07	330069
6	108858460	rs9480861	T	C	0.41233	0.009156	0.0017491	1.65425e-07	330069
2	175003640	rs35312569	C	T	0.39989	0.009176	0.001753	1.65539e-07	330069
9	86429305	rs295268	C	T	0.26343	0.0092268	0.0017628	1.65768e-07	330069
1	49801349	rs12036970	A	G	0.59785	0.009205	0.001759	1.66725e-07	330069
7	44892742	rs62460522	T	C	0.068454	-0.0090188	0.0017234	1.66878e-07	330069
2	174999188	rs4972431	T	C	0.47789	0.0091512	0.0017488	1.66917e-07	330069
2	174972689	rs935396	A	T	0.4026	0.009165	0.0017514	1.66955e-07	330069
13	58388491	rs1436682	G	C	0.42189	-0.0091163	0.0017421	1.66994e-07	330069
13	58448887	rs9537840	A	G	0.42165	-0.0091157	0.0017421	1.67263e-07	330069
13	58447640	rs9537839	T	C	0.42165	-0.0091154	0.0017421	1.67456e-07	330069
12	112059557	rs11065979	T	C	0.42107	0.0091781	0.0017542	1.67726e-07	330069
13	58388024	rs9537819	G	A	0.42164	-0.009115	0.0017422	1.6788e-07	330069
13	58441582	rs34150102	C	T	0.42164	-0.0091147	0.0017421	1.6788e-07	330069
2	175013963	rs11674895	A	C	0.47717	0.0091497	0.0017489	1.6819e-07	330069
1	50372032	rs12403905	G	A	0.61568	0.0092106	0.0017606	1.68306e-07	330069
2	24174483	rs34499205	G	A	0.45259	0.0091226	0.001744	1.68772e-07	330069
7	44902676	rs62460525	A	C	0.068467	-0.009015	0.0017235	1.69161e-07	330069
18	34796243	rs323483	T	G	0.33104	-0.0091926	0.0017575	1.69278e-07	330069
13	58394849	rs8000825	A	G	0.42194	-0.0091114	0.0017421	1.6959e-07	330069
12	111754048	rs4766507	C	T	0.23639	-0.0096873	0.0018524	1.7002e-07	330069
2	104215727	rs2044933	C	T	0.44976	-0.0091131	0.0017426	1.70098e-07	330069
11	46820899	rs7118097	G	A	0.092165	0.0094375	0.0018047	1.70216e-07	330069
13	58389325	rs9527703	G	A	0.42163	-0.0091089	0.0017422	1.7108e-07	330069
11	46784697	rs7928445	C	A	0.091581	0.0093953	0.001797	1.71317e-07	330069
1	50141412	rs6693344	C	G	0.55847	0.0092174	0.0017631	1.71554e-07	330069
2	24610392	rs2702121	A	C	0.63154	0.0090997	0.0017407	1.71712e-07	330069
11	46782472	rs10466477	A	C	0.091566	0.0093928	0.0017968	1.7187e-07	330069
13	58369790	rs2184324	T	G	0.42165	-0.0091072	0.0017422	1.7191e-07	330069
11	46837201	rs4128315	C	T	0.091511	0.0093928	0.001797	1.72346e-07	330069
11	46781718	rs10466476	T	A	0.090402	0.0093165	0.0017825	1.72663e-07	330069
11	63964605	rs2236647	T	C	0.44716	0.0091312	0.0017471	1.72743e-07	330069
1	97153920	rs2021641	T	C	0.09636	0.0090815	0.0017376	1.72982e-07	330069
13	58375169	rs34363229	C	T	0.42149	-0.0091061	0.0017424	1.73021e-07	330069
18	40940932	rs75344947	C	T	0.13697	0.0090849	0.0017383	1.73101e-07	330069
2	175009842	rs6433465	G	C	0.47841	0.0091419	0.0017492	1.73101e-07	330069
1	50049874	rs34469945	G	A	0.5633	0.0091745	0.0017556	1.7346e-07	330069
13	58365753	rs9563537	C	G	0.42158	-0.0091037	0.0017421	1.7354e-07	330069
4	89464245	rs4693963	C	T	0.16767	0.0091109	0.0017436	1.7382e-07	330069
13	58364124	rs9569744	C	G	0.42157	-0.0091029	0.0017421	1.7402e-07	330069
2	71534617	rs4470366	A	T	0.57294	-0.0091706	0.0017551	1.74261e-07	330069
2	24173167	rs13009856	T	C	0.4526	0.0091119	0.0017439	1.74301e-07	330069
13	58382629	rs9537817	C	A	0.42163	-0.0091023	0.0017422	1.74502e-07	330069
7	109693406	rs76354773	G	T	0.054636	-0.0092881	0.001778	1.75307e-07	330069
11	46854977	rs2867206	T	C	0.09211	0.0094266	0.0018046	1.75469e-07	330069
1	50260247	rs28393899	C	G	0.55677	0.0092394	0.0017687	1.75469e-07	330069
13	58451496	rs7324127	G	A	0.42164	-0.0090994	0.0017421	1.75954e-07	330069
1	205789282	rs823080	A	G	0.39902	0.0091133	0.001745	1.76563e-07	330069
13	58375861	rs2320923	A	G	0.42165	-0.0090986	0.0017422	1.76644e-07	330069
13	58375865	rs2320924	C	T	0.42165	-0.0090986	0.0017422	1.76644e-07	330069
13	58379487	rs9569757	G	A	0.42165	-0.0090986	0.0017422	1.76685e-07	330069
17	15579448	rs142177012	G	A	0.00083915	0.10155	0.019445	1.76685e-07	330069
2	71620111	rs4852780	C	T	0.59267	-0.0091644	0.0017548	1.76726e-07	330069
13	58379719	rs34804439	A	T	0.42165	-0.0090982	0.0017422	1.76889e-07	330069
13	58380872	rs9569758	C	G	0.42165	-0.0090982	0.0017422	1.76889e-07	330069
13	58381615	rs1577177	T	C	0.42165	-0.0090982	0.0017422	1.76889e-07	330069
13	58382129	rs1344064	T	C	0.42165	-0.0090978	0.0017422	1.77052e-07	330069
3	186192446	rs141542299	C	T	0.00050937	0.09187	0.017593	1.77052e-07	330069
12	13391291	rs3925523	A	G	0.58608	0.0090871	0.0017403	1.77419e-07	330069
10	63668161	rs12569576	G	A	0.4496	0.0090878	0.0017406	1.77992e-07	330069
17	1302472	rs12452627	A	G	0.080894	-0.0089823	0.0017207	1.78978e-07	330069
1	97119146	rs61787887	G	T	0.097094	0.0090744	0.0017384	1.79102e-07	330069
7	109687986	rs73714036	G	A	0.054619	-0.0092732	0.0017765	1.79102e-07	330069
7	44836268	rs8177826	G	C	0.073925	-0.0089878	0.001722	1.79473e-07	330069
11	46838838	rs7105217	A	T	0.091519	0.0093793	0.001797	1.79515e-07	330069
10	63668916	rs4948289	C	G	0.44954	0.0090842	0.0017406	1.79929e-07	330069
2	76465290	rs12471182	A	G	0.54196	-0.0091638	0.0017559	1.80094e-07	330069
2	24468132	rs4665675	C	T	0.58101	0.0091034	0.0017444	1.80177e-07	330069
9	76893317	rs10781213	T	C	0.67459	0.0092116	0.0017654	1.81051e-07	330069
10	63666691	rs7922394	C	T	0.44966	0.0090814	0.0017404	1.81092e-07	330069
4	89462728	rs6815479	G	C	0.16772	0.0090947	0.0017431	1.81468e-07	330069
7	44876747	rs62460519	T	C	0.068418	-0.0089899	0.0017234	1.826e-07	330069
7	44879329	rs117833461	T	C	0.068418	-0.0089898	0.0017234	1.82642e-07	330069
2	175012137	rs4972433	A	G	0.40017	0.0091434	0.0017529	1.82852e-07	330069
2	174974596	rs10930638	A	G	0.40268	0.0091335	0.0017515	1.8412e-07	330069
2	174973021	rs1867860	C	T	0.40269	0.0091325	0.0017514	1.84502e-07	330069
2	175008772	rs6433464	T	C	0.47763	0.0091205	0.0017491	1.84672e-07	330069
17	6356818	rs4796330	A	G	0.48892	0.0090999	0.0017452	1.84799e-07	330069
8	4846309	rs2977733	G	C	0.66896	0.0090643	0.0017385	1.85012e-07	330069
13	58399608	rs9569759	A	C	0.42286	-0.0090819	0.001742	1.85439e-07	330069
2	76419240	rs12996043	G	A	0.18113	0.0089981	0.001726	1.85652e-07	330069
2	76405077	rs13406563	G	C	0.6992	-0.0091525	0.0017556	1.85738e-07	330069
2	71630041	rs7578166	C	A	0.60835	-0.0091239	0.0017502	1.85909e-07	330069
7	44863439	rs56304870	A	T	0.068601	-0.0089896	0.0017245	1.8608e-07	330069
1	97137884	rs12026342	A	C	0.097085	0.009061	0.0017383	1.86252e-07	330069
9	76892408	rs10781212	T	A	0.67562	0.0091767	0.0017607	1.86896e-07	330069
2	201095739	rs78988795	A	G	0.14124	0.0089481	0.0017169	1.87111e-07	330069
13	58362487	rs9563536	A	G	0.42199	-0.0090778	0.0017419	1.87499e-07	330069
18	67179641	rs11659254	A	G	0.20263	0.009024	0.0017318	1.88191e-07	330069
2	175019193	rs11694065	C	A	0.47734	0.0091141	0.0017491	1.88191e-07	330069
5	112195992	rs380144	G	A	0.68387	-0.0090397	0.0017349	1.88322e-07	330069
7	44845032	rs17134462	G	A	0.073913	-0.0089716	0.0017218	1.88495e-07	330069
2	175016409	rs2119135	T	C	0.47729	0.0091111	0.001749	1.89583e-07	330069
1	97145162	rs61759529	G	T	0.097128	0.0090559	0.0017384	1.89802e-07	330069
7	109670217	rs141446492	A	G	0.054578	-0.0092516	0.0017761	1.89889e-07	330069
9	76886080	rs7022880	C	T	0.67716	0.0091451	0.0017561	1.91382e-07	330069
18	67178899	rs11663218	T	A	0.20259	0.0090181	0.0017317	1.91514e-07	330069
2	24611490	rs13031977	A	G	0.63197	0.0090624	0.0017405	1.92398e-07	330069
7	44866362	rs62460516	C	T	0.068416	-0.0089731	0.0017234	1.92442e-07	330069
13	58363344	rs9537801	A	G	0.42173	-0.0090693	0.0017419	1.92619e-07	330069
16	56295097	rs2587879	C	T	0.56553	0.0090605	0.0017403	1.92752e-07	330069
2	175015105	rs726622	C	G	0.47727	0.0091057	0.001749	1.92752e-07	330069
2	59991047	rs11125813	A	G	0.21489	0.0090011	0.0017289	1.9293e-07	330069
2	175032629	rs12465566	G	A	0.47824	0.0091074	0.0017494	1.9293e-07	330069
2	24361962	rs12613951	A	G	0.46967	0.0090864	0.0017455	1.93642e-07	330069
7	127601254	rs1362267	T	C	0.86183	0.009122	0.0017525	1.9391e-07	330069
2	175014249	rs10930644	A	G	0.47725	0.0091025	0.001749	1.94626e-07	330069
9	76889426	rs737069	A	T	0.67425	0.0091889	0.0017657	1.9494e-07	330069
5	112254377	rs153560	A	G	0.61255	0.0090693	0.0017427	1.95164e-07	330069
1	97144187	rs12027898	A	C	0.097149	0.0090448	0.0017384	1.962e-07	330069
2	175010012	rs6433466	T	A	0.47778	0.0091002	0.0017491	1.96381e-07	330069
9	76887033	rs7038819	T	C	0.6772	0.0091361	0.0017561	1.96653e-07	330069
1	50250273	rs10888669	C	T	0.61609	0.0091608	0.0017609	1.96789e-07	330069
1	205801872	rs1361754	G	A	0.52335	0.0091306	0.0017551	1.9697e-07	330069
1	97129720	rs12042003	G	T	0.097071	0.0090433	0.0017384	1.97197e-07	330069
2	175014678	rs12693034	T	C	0.47725	0.0090975	0.001749	1.97697e-07	330069
2	175017629	rs2119136	A	G	0.47725	0.0090961	0.001749	1.98564e-07	330069
3	84786979	rs2034718	G	C	0.6308	-0.0090619	0.0017425	1.98747e-07	330069
12	112591686	rs17630235	A	G	0.39249	0.0091017	0.0017503	1.99434e-07	330069
11	63869531	rs641430	C	T	0.4074	0.0090689	0.0017442	2.00078e-07	330069
9	76888701	rs2061081	A	G	0.67476	0.009168	0.0017636	2.01187e-07	330069
18	34799457	rs323485	T	C	0.33088	-0.0091361	0.0017576	2.01512e-07	330069
11	46776093	rs4500447	G	A	0.091494	0.0093405	0.0017969	2.01558e-07	330069
7	32971838	rs7788070	C	T	0.88912	-0.009074	0.0017458	2.02069e-07	330069
2	76435772	rs2860731	C	T	0.70474	-0.0091214	0.001755	2.02302e-07	330069
11	63869493	rs641378	C	T	0.40738	0.0090644	0.0017441	2.02488e-07	330069
18	67183056	rs1372775	T	A	0.20259	0.0090008	0.001732	2.02768e-07	330069
2	172731983	rs59844139	A	C	0.54813	0.0091096	0.001753	2.03002e-07	330069
2	56446420	rs17268667	G	A	0.40421	0.0090761	0.0017466	2.03095e-07	330069
13	58368501	rs9537806	G	A	0.42146	-0.0090521	0.0017421	2.0347e-07	330069
2	175017480	rs2165212	C	T	0.47727	0.0090878	0.001749	2.03657e-07	330069
13	58368667	rs9527698	T	C	0.42174	-0.0090515	0.0017421	2.04033e-07	330069
2	174977976	rs10048760	G	T	0.47836	0.00907	0.0017459	2.04833e-07	330069
1	50034036	rs10157679	G	C	0.5635	0.009117	0.001755	2.0488e-07	330069
9	86634309	rs11140324	C	T	0.79101	-0.009055	0.0017431	2.05258e-07	330069
16	56217674	rs2464763	T	C	0.52638	0.0090454	0.0017414	2.05542e-07	330069
17	50341729	rs35199790	C	A	0.34401	0.0090235	0.0017373	2.06016e-07	330069
16	56217343	rs1210080	T	C	0.52637	0.0090437	0.0017414	2.06681e-07	330069
2	76423946	rs1316629	C	T	0.70482	-0.0091206	0.0017562	2.06776e-07	330069
6	130600056	rs12197194	A	G	0.2928	-0.009104	0.0017531	2.06871e-07	330069
2	24364009	rs13020405	A	G	0.47648	0.0090614	0.0017449	2.06966e-07	330069
11	63871533	rs687581	T	G	0.58763	-0.0090949	0.0017514	2.07109e-07	330069
9	76883663	rs10781211	C	T	0.67474	0.0091587	0.0017637	2.07109e-07	330069
16	56217791	rs1211839	T	G	0.52637	0.0090427	0.0017414	2.073e-07	330069
17	50340210	rs12947709	C	G	0.34422	0.0090202	0.0017371	2.07348e-07	330069
17	50339516	rs35780839	T	C	0.34451	0.0090184	0.0017369	2.0797e-07	330069
9	86658762	rs55714514	C	T	0.80582	-0.0091165	0.0017563	2.09508e-07	330069
17	50340123	rs7504052	T	C	0.34453	0.0090165	0.001737	2.09604e-07	330069
12	111702646	rs2339718	G	A	0.2601	-0.0092199	0.0017762	2.09701e-07	330069
13	58361506	rs2151824	G	A	0.42205	-0.0090414	0.0017419	2.09846e-07	330069
16	56215858	rs1734196	A	G	0.52639	0.0090388	0.0017414	2.09894e-07	330069
5	111997372	rs4705777	G	A	0.56806	-0.0090275	0.0017393	2.09942e-07	330069
2	76427727	rs1404090	C	T	0.704	-0.0091224	0.0017576	2.10039e-07	330069
12	112431212	rs57646770	C	T	0.17616	-0.0091095	0.0017553	2.10863e-07	330069
2	155703266	rs2971906	T	G	0.075062	0.0091957	0.001772	2.1096e-07	330069
11	63871549	rs638227	C	T	0.40763	0.0090501	0.0017441	2.11495e-07	330069
12	111759237	rs7136685	C	T	0.23711	-0.0096136	0.0018527	2.11495e-07	330069
11	63872210	rs635139	G	A	0.40765	0.0090491	0.0017441	2.12129e-07	330069
17	50339667	rs1486751	C	G	0.34457	0.0090116	0.0017369	2.12471e-07	330069
18	67180269	rs7231448	T	A	0.20255	0.008985	0.0017318	2.12471e-07	330069
16	56216169	rs1734198	T	G	0.52631	0.0090345	0.0017414	2.12618e-07	330069
18	67182665	rs17081109	A	C	0.20256	0.0089853	0.0017319	2.12667e-07	330069
5	112293541	rs469855	C	T	0.20054	0.0089662	0.0017283	2.1301e-07	330069
17	50341638	rs34931948	T	C	0.34417	0.0090121	0.0017373	2.13354e-07	330069
7	44873982	rs56252693	A	G	0.068425	-0.0089397	0.0017235	2.13895e-07	330069
6	130600253	rs12197317	A	G	0.29187	-0.0090822	0.0017512	2.14487e-07	330069
9	76883237	rs4745311	G	C	0.67413	0.0091579	0.001766	2.15278e-07	330069
1	183401670	rs2023600	C	T	0.47289	-0.009054	0.001746	2.15477e-07	330069
2	172901330	rs13015360	C	T	0.62803	0.0090631	0.0017477	2.15477e-07	330069
11	63872029	rs592271	T	G	0.40747	0.0090437	0.0017441	2.15774e-07	330069
2	56447038	rs763345	G	A	0.40256	0.009056	0.0017465	2.16073e-07	330069
12	49424616	rs11614738	A	G	0.35381	0.0090299	0.0017417	2.16621e-07	330069
11	46771358	rs11038985	G	T	0.092151	0.0093552	0.0018046	2.1712e-07	330069
1	50219948	rs4097079	A	T	0.61607	0.0091275	0.0017607	2.1727e-07	330069
19	4028290	rs72976957	A	G	0.15761	-0.0089538	0.0017274	2.17972e-07	330069
2	76428279	rs954186	G	A	0.70412	-0.0091103	0.0017576	2.18022e-07	330069
2	155875812	rs10191743	T	A	0.93546	-0.0091085	0.0017573	2.18172e-07	330069
11	63870383	rs672104	T	A	0.40735	0.0090394	0.001744	2.18223e-07	330069
1	49918926	rs950562	A	C	0.624	0.0091288	0.0017615	2.1928e-07	330069
9	76886952	rs7023727	C	A	0.67476	0.0091385	0.0017636	2.2009e-07	330069
7	44881364	rs62460521	T	C	0.068464	-0.0089306	0.0017235	2.20191e-07	330069
2	175034886	rs35813013	A	G	0.47936	0.0090654	0.0017496	2.20394e-07	330069
2	56445414	rs727297	G	A	0.40434	0.0090484	0.0017464	2.20699e-07	330069
17	50339911	rs1486750	C	T	0.34456	0.008999	0.001737	2.21055e-07	330069
1	49847861	rs1338216	C	T	0.61568	0.0091194	0.0017604	2.21513e-07	330069
11	63872543	rs594461	G	A	0.4098	0.0090398	0.0017451	2.21922e-07	330069
12	116772891	rs74643199	T	A	0.15639	0.0089168	0.0017214	2.22024e-07	330069
9	76887589	rs10869371	A	G	0.67474	0.0091353	0.0017636	2.22229e-07	330069
9	76887695	rs12554267	A	C	0.67474	0.0091353	0.0017636	2.22229e-07	330069
2	175031344	rs10189011	C	G	0.47816	0.0090606	0.0017493	2.22638e-07	330069
17	50341693	rs35935617	A	G	0.34409	0.0089984	0.0017374	2.22741e-07	330069
17	50341059	rs12600644	T	C	0.3442	0.0089969	0.0017371	2.22844e-07	330069
17	50341398	rs35305299	G	A	0.34423	0.0089975	0.0017372	2.22895e-07	330069
7	123717840	rs11977132	T	C	0.32199	0.0089862	0.001735	2.22895e-07	330069
11	46609720	rs61882755	C	T	0.060873	0.0088852	0.0017156	2.23049e-07	330069
16	56171452	rs4784638	A	C	0.47388	-0.0090187	0.0017414	2.23203e-07	330069
7	32946363	rs41479949	T	C	0.094277	0.008999	0.0017377	2.2346e-07	330069
2	174930016	rs2358443	T	C	0.42671	0.0090456	0.0017467	2.23666e-07	330069
2	175008424	rs10930642	C	A	0.40188	0.0090737	0.0017523	2.24337e-07	330069
2	175000711	rs10930641	G	A	0.40238	0.0090721	0.0017521	2.2444e-07	330069
2	175000793	rs11684977	T	G	0.40239	0.0090722	0.0017521	2.2444e-07	330069
12	111703313	rs2009170	C	T	0.26132	-0.0092226	0.0017812	2.24698e-07	330069
11	63877501	rs616563	C	G	0.40705	0.0090283	0.0017438	2.25165e-07	330069
2	175034192	rs12474970	T	C	0.47817	0.0090565	0.0017493	2.25476e-07	330069
11	63967770	rs11231722	G	C	0.42492	0.0090004	0.0017385	2.2558e-07	330069
1	50223721	rs3903686	C	T	0.61657	0.0091162	0.0017611	2.26152e-07	330069
2	175031846	rs10204087	C	T	0.47816	0.0090551	0.0017493	2.26412e-07	330069
2	175033174	rs10195413	A	G	0.47816	0.0090551	0.0017493	2.26412e-07	330069
7	123712562	rs1860486	C	T	0.32782	0.0090071	0.0017401	2.26725e-07	330069
2	56445480	rs2216324	G	A	0.40439	0.0090397	0.0017465	2.26778e-07	330069
17	15607715	rs193152134	A	G	0.00084091	0.099989	0.019318	2.26986e-07	330069
5	112269219	rs149502	C	T	0.34444	0.0089808	0.0017353	2.27615e-07	330069
17	7167776	rs57508443	C	T	0.13148	-0.0088757	0.0017151	2.28139e-07	330069
2	175031590	rs10203886	C	T	0.47816	0.0090526	0.0017493	2.28192e-07	330069
4	118340708	rs17861885	G	T	0.12143	-0.008905	0.0017209	2.28402e-07	330069
7	123713370	rs6959480	C	T	0.32782	0.0090044	0.0017401	2.28665e-07	330069
16	56182809	rs12930262	T	C	0.47363	-0.0090107	0.0017414	2.28929e-07	330069
17	50341352	rs12943832	G	A	0.34426	0.0089883	0.0017372	2.29245e-07	330069
6	130600040	rs12210502	G	A	0.2928	-0.00907	0.0017531	2.29456e-07	330069
2	56450038	rs7579447	G	A	0.40456	0.0090332	0.001746	2.29774e-07	330069
12	49425978	rs3741622	C	T	0.35392	0.0090109	0.0017417	2.29879e-07	330069
1	205782718	rs9438393	G	A	0.39932	0.0090286	0.0017452	2.30091e-07	330069
17	50341661	rs35199094	T	C	0.34421	0.0089881	0.0017374	2.30144e-07	330069
3	46951935	rs11719795	C	T	0.70337	0.0090456	0.0017486	2.30303e-07	330069
1	50079503	rs12402329	T	C	0.61579	0.0091088	0.001761	2.31153e-07	330069
12	38066271	rs11520077	G	T	0.44662	-0.0090058	0.0017412	2.31366e-07	330069
17	50341226	rs12943497	T	A	0.34424	0.0089849	0.0017371	2.3142e-07	330069
17	50340800	rs12602484	G	A	0.34418	0.0089846	0.0017372	2.31739e-07	330069
9	104918906	rs374016619	G	A	0.0016672	0.0088503	0.0017113	2.3206e-07	330069
2	174963323	rs1374317	T	C	0.47961	0.0090283	0.0017462	2.3383e-07	330069
15	47921514	rs2136897	C	T	0.24357	0.0089498	0.0017311	2.34207e-07	330069
2	24443330	rs1203	G	A	0.6295	0.0090032	0.0017415	2.34639e-07	330069
7	123700859	rs56208919	C	T	0.32685	0.0089949	0.00174	2.34963e-07	330069
11	63869879	rs669913	G	A	0.40736	0.0090151	0.0017442	2.35939e-07	330069
6	130552266	rs12192791	A	G	0.28856	-0.0090528	0.0017515	2.36157e-07	330069
11	63908660	rs12362602	A	G	0.55159	-0.0090288	0.001747	2.36429e-07	330069
7	127584608	rs917831	A	T	0.86377	0.0090392	0.0017491	2.36701e-07	330069
17	50340912	rs12600621	T	C	0.34421	0.0089773	0.0017372	2.36974e-07	330069
7	123700853	rs60474351	A	G	0.32684	0.0089917	0.00174	2.37411e-07	330069
11	45128569	rs10769116	C	T	0.35933	-0.0091139	0.0017637	2.37465e-07	330069
11	63869821	rs666497	C	G	0.40737	0.0090127	0.0017442	2.37629e-07	330069
1	205798313	rs823084	T	G	0.52404	0.0090626	0.0017539	2.37903e-07	330069
17	44068492	rs11656151	G	A	0.23664	0.0090039	0.0017426	2.38013e-07	330069
2	24252436	rs3204	G	A	0.46183	0.0090061	0.001743	2.38177e-07	330069
5	112261278	rs153553	A	G	0.48167	0.0090582	0.0017533	2.38891e-07	330069
2	76406262	rs66625537	C	T	0.18258	0.0089158	0.0017259	2.39276e-07	330069
17	50340168	rs12947671	A	G	0.34413	0.0089735	0.0017371	2.39718e-07	330069
6	130598459	rs12200674	A	T	0.29281	-0.0090563	0.0017532	2.39718e-07	330069
13	58355337	rs12863965	C	T	0.42232	-0.0090002	0.0017423	2.39883e-07	330069
11	63870810	rs651855	C	T	0.40958	0.0090142	0.0017452	2.40326e-07	330069
7	32925560	rs145578681	A	G	0.094234	0.0089684	0.0017364	2.40658e-07	330069
16	56198604	rs1190645	C	T	0.4737	-0.0089941	0.0017414	2.40769e-07	330069
13	58361718	rs7318103	A	G	0.42167	-0.008997	0.001742	2.4088e-07	330069
18	40937261	rs62090661	A	C	0.14183	0.008972	0.0017372	2.41102e-07	330069
17	50340880	rs12600511	T	G	0.34444	0.0089714	0.0017371	2.41157e-07	330069
16	56203637	rs9936839	C	G	0.52629	0.0089934	0.0017414	2.41268e-07	330069
18	67182199	rs12969411	C	T	0.19982	0.0088989	0.0017233	2.4188e-07	330069
16	56198294	rs1203490	T	C	0.47369	-0.0089915	0.0017414	2.42717e-07	330069
16	56199983	rs1641692	T	C	0.47369	-0.0089912	0.0017414	2.42885e-07	330069
2	174957262	rs6433462	C	T	0.40351	0.0090412	0.0017511	2.42941e-07	330069
2	174956811	rs9636296	C	T	0.48067	0.0090192	0.0017469	2.43108e-07	330069
16	56195876	rs1151258	A	C	0.47369	-0.0089898	0.0017414	2.44062e-07	330069
2	175029504	rs12693035	T	C	0.47814	0.0090299	0.0017493	2.44399e-07	330069
2	56449648	rs2193475	C	A	0.4047	0.0090136	0.0017463	2.44906e-07	330069
1	97012432	rs12567789	G	A	0.11686	0.0089383	0.0017317	2.45188e-07	330069
2	76404741	rs35853212	G	A	0.18265	0.0089082	0.001726	2.45641e-07	330069
1	205774839	rs823074	C	T	0.39999	0.0090079	0.0017455	2.4632e-07	330069
2	174959554	rs9677790	G	A	0.48085	0.0090156	0.001747	2.4632e-07	330069
7	32944132	rs12533180	C	A	0.09426	0.0089672	0.0017377	2.4649e-07	330069
16	56172405	rs12600264	C	T	0.47371	-0.0089862	0.0017414	2.46774e-07	330069
16	56166487	rs8052085	A	C	0.47372	-0.0089857	0.0017414	2.47002e-07	330069
4	84205462	rs116663439	T	C	0.00050438	0.12419	0.024068	2.47116e-07	330069
1	49796157	rs1494462	G	A	0.57646	0.0091122	0.001766	2.47229e-07	330069
7	123712081	rs10487809	A	G	0.32313	0.0089543	0.0017354	2.47457e-07	330069
12	112373089	rs12314527	C	T	0.17698	-0.0090822	0.0017603	2.47685e-07	330069
1	209741377	rs9429998	G	A	0.27461	0.0089683	0.0017382	2.47742e-07	330069
2	174976397	rs935397	T	A	0.40292	0.0090358	0.0017513	2.47742e-07	330069
16	56175242	rs8057753	C	T	0.47371	-0.008984	0.0017414	2.48428e-07	330069
16	56195746	rs1151259	C	T	0.47376	-0.008984	0.0017414	2.48428e-07	330069
11	46705974	rs61884297	A	T	0.060563	0.0088562	0.0017167	2.48542e-07	330069
7	123700519	rs2052094	A	G	0.32775	0.0089756	0.0017398	2.48599e-07	330069
7	127589753	rs887745	A	T	0.86357	0.0090316	0.0017507	2.48599e-07	330069
4	118348459	rs6825806	C	A	0.12118	-0.0088752	0.0017204	2.48771e-07	330069
12	49407952	rs10875911	A	C	0.35481	0.0089792	0.0017406	2.49e-07	330069
12	112429469	rs12423126	G	C	0.1757	-0.0090494	0.0017543	2.49058e-07	330069
16	56177502	rs11864718	C	T	0.47378	-0.0089814	0.0017414	2.50438e-07	330069
12	112293910	rs111374400	C	T	0.1768	-0.0090765	0.00176	2.50957e-07	330069
2	174980833	rs7573263	T	C	0.40287	0.0090327	0.0017515	2.51015e-07	330069
12	112263402	rs7137270	A	G	0.17542	-0.0090425	0.0017534	2.51131e-07	330069
12	112264158	rs10849974	T	C	0.17542	-0.0090415	0.0017535	2.51884e-07	330069
16	56168492	rs12598346	T	C	0.47369	-0.008979	0.0017414	2.52e-07	330069
2	174956770	rs6718555	G	A	0.48059	0.0090069	0.0017469	2.52406e-07	330069
2	175030795	rs12463397	G	A	0.47871	0.00902	0.0017495	2.52639e-07	330069
12	112264648	rs10849975	A	G	0.17543	-0.0090405	0.0017535	2.52755e-07	330069
2	174979709	rs2028890	T	C	0.40266	0.0090301	0.0017516	2.53338e-07	330069
12	112265083	rs57303367	T	C	0.17543	-0.0090397	0.0017535	2.53396e-07	330069
7	44846305	rs62460498	A	C	0.073733	-0.0088707	0.0017209	2.54039e-07	330069
2	174959870	rs12622077	T	C	0.48113	0.0090045	0.0017469	2.5439e-07	330069
2	175038023	rs9646789	G	T	0.47881	0.0090178	0.0017495	2.5439e-07	330069
2	76405127	rs35103010	T	A	0.18117	0.0088838	0.0017235	2.54624e-07	330069
12	112334923	rs7977009	G	A	0.1769	-0.0090716	0.0017601	2.55211e-07	330069
17	50340513	rs57639344	C	G	0.34557	0.0089435	0.0017353	2.55505e-07	330069
12	111967155	rs76604970	T	A	0.093731	-0.0090001	0.0017464	2.558e-07	330069
12	112266624	rs61547643	C	G	0.17544	-0.0090367	0.0017535	2.558e-07	330069
11	46550225	rs61882744	T	G	0.06023	0.008837	0.0017148	2.55859e-07	330069
7	44845866	rs55812131	G	T	0.073852	-0.0088724	0.0017218	2.56507e-07	330069
12	112684221	rs7953257	T	A	0.61025	-0.0090227	0.001751	2.56567e-07	330069
11	46730522	rs11606709	G	A	0.69067	-0.0091952	0.0017845	2.56626e-07	330069
12	112354531	rs7294902	C	T	0.1779	-0.0090983	0.0017657	2.56862e-07	330069
4	89458051	rs11736472	A	G	0.17495	0.0089705	0.0017411	2.57513e-07	330069
12	112358663	rs7312260	G	T	0.17789	-0.0090966	0.0017656	2.57691e-07	330069
7	44823192	rs17134301	T	C	0.074149	-0.0088724	0.0017221	2.57751e-07	330069
2	76409529	rs11679728	G	A	0.18258	0.0088917	0.0017259	2.5781e-07	330069
6	97929355	rs13192865	A	G	0.2644	-0.0089531	0.0017378	2.5781e-07	330069
4	84217055	rs60557327	C	T	0.0005094	0.12401	0.024072	2.58226e-07	330069
2	172747182	rs62182403	A	G	0.53998	0.009027	0.0017522	2.58285e-07	330069
2	76405967	rs66609617	C	T	0.18252	0.0088907	0.0017258	2.58523e-07	330069
2	76420089	rs6759778	A	G	0.70423	-0.0090463	0.001756	2.58583e-07	330069
7	44829383	rs73111215	T	C	0.07414	-0.0088714	0.0017222	2.58821e-07	330069
2	76413962	rs10167391	A	C	0.63704	-0.0090409	0.0017552	2.59478e-07	330069
2	76408841	rs34847153	C	T	0.18104	0.0088704	0.0017222	2.59777e-07	330069
12	13390053	rs5012466	T	C	0.58642	0.0089603	0.0017397	2.60016e-07	330069
2	155713849	rs75561433	A	G	0.067244	0.0088523	0.0017187	2.60016e-07	330069
7	44825196	rs62460487	A	G	0.074151	-0.0088699	0.0017222	2.60076e-07	330069
12	112285116	rs57046217	C	T	0.17682	-0.0090642	0.00176	2.60435e-07	330069
6	130581553	rs11154537	G	A	0.28905	-0.0089934	0.0017463	2.60495e-07	330069
1	37521938	rs6687485	A	G	0.56669	0.0089822	0.0017441	2.60555e-07	330069
7	44826525	rs62460490	A	G	0.074152	-0.0088693	0.0017222	2.60555e-07	330069
17	44270181	17:44270181_G_A	A	G	0.40032	0.0089872	0.0017451	2.60856e-07	330069
2	175025821	rs10189326	A	C	0.4787	0.0090072	0.0017493	2.6212e-07	330069
1	50487621	rs11205674	A	G	0.6151	0.0090574	0.0017592	2.62482e-07	330069
11	63869425	rs640999	A	C	0.40741	0.0089795	0.0017441	2.62543e-07	330069
9	86465395	rs9410887	C	T	0.25879	0.0090549	0.0017589	2.6339e-07	330069
2	162883962	rs2300755	A	G	0.36154	-0.0090536	0.0017587	2.63572e-07	330069
7	44822603	rs7790348	T	C	0.074177	-0.0088649	0.0017221	2.63815e-07	330069
7	44831648	rs56186297	C	T	0.074139	-0.0088646	0.0017222	2.64423e-07	330069
12	111865049	rs7310615	G	C	0.53671	-0.0090714	0.0017625	2.64911e-07	330069
2	24323610	rs55816106	C	T	0.46887	0.0089701	0.0017428	2.65033e-07	330069
4	118349694	rs17861898	C	G	0.12075	-0.008844	0.0017183	2.65155e-07	330069
7	32938217	rs11764804	T	C	0.09432	0.0089435	0.0017377	2.65216e-07	330069
12	112272717	rs12319539	A	G	0.1755	-0.0090253	0.0017536	2.65277e-07	330069
7	44833936	rs62460495	G	T	0.074137	-0.0088629	0.0017222	2.65828e-07	330069
11	46966633	rs61899280	C	T	0.061164	0.0088198	0.001714	2.66747e-07	330069
8	4845810	rs2977732	G	C	0.66208	0.0089419	0.0017378	2.66993e-07	330069
12	112272776	rs12306584	T	C	0.17551	-0.0090229	0.0017536	2.67239e-07	330069
11	63986713	rs11603538	A	C	0.35981	0.0089276	0.0017351	2.67301e-07	330069
7	44834497	rs17860038	T	G	0.074137	-0.008861	0.0017222	2.67424e-07	330069
12	112388128	rs11066098	T	A	0.17595	-0.0090558	0.0017601	2.67609e-07	330069
17	50334924	rs12604022	T	C	0.3426	0.0089301	0.0017358	2.68349e-07	330069
15	47917801	rs112053692	A	G	0.24327	0.0089039	0.0017308	2.68534e-07	330069
7	44834905	rs17860041	A	C	0.074081	-0.0088593	0.0017222	2.68658e-07	330069
2	24528114	rs11125535	C	T	0.57819	0.0089751	0.0017447	2.6872e-07	330069
9	86465369	rs12682981	G	A	0.26279	0.009084	0.0017659	2.6872e-07	330069
12	112320947	rs11066062	T	C	0.17564	-0.0090205	0.0017536	2.68906e-07	330069
2	172618474	rs9789538	C	G	0.58312	0.0090409	0.0017575	2.6903e-07	330069
2	175028556	rs9636262	C	T	0.47814	0.0089983	0.0017493	2.6903e-07	330069
11	63934523	rs6591836	T	C	0.35941	0.0089182	0.0017341	2.70832e-07	330069
2	201232864	rs7583574	A	G	0.33559	-0.0089506	0.0017404	2.70832e-07	330069
11	63898806	rs17699798	G	C	0.5511	-0.0089857	0.0017473	2.70894e-07	330069
12	112424570	rs7956483	G	A	0.1747	-0.0090208	0.0017543	2.71832e-07	330069
4	118352364	rs68096032	G	A	0.12079	-0.0088359	0.0017184	2.72145e-07	330069
11	45128302	rs3740787	G	A	0.35966	-0.0090852	0.0017671	2.72961e-07	330069
3	170986411	rs6444974	A	G	0.44744	0.0089509	0.0017411	2.73716e-07	330069
1	205786935	rs823082	C	T	0.5231	0.0090206	0.0017549	2.74663e-07	330069
12	112423286	rs73426401	T	C	0.17473	-0.0090168	0.0017543	2.75106e-07	330069
12	112421352	rs7313892	T	G	0.17469	-0.0090162	0.0017543	2.75613e-07	330069
2	201230857	rs71424255	G	C	0.33538	-0.0089458	0.0017406	2.75804e-07	330069
16	56145986	rs4783931	C	G	0.44499	-0.00895	0.0017415	2.75994e-07	330069
7	44832601	rs62460494	C	T	0.074141	-0.0088501	0.0017222	2.76567e-07	330069
7	44833141	rs143992820	A	G	0.074142	-0.0088496	0.0017222	2.77013e-07	330069
7	44832422	rs62460493	T	C	0.074002	-0.0088483	0.001722	2.7746e-07	330069
1	49924951	rs7528404	A	G	0.62438	0.009051	0.0017616	2.77715e-07	330069
18	67183792	rs7230697	C	T	0.20269	0.0088989	0.001732	2.77843e-07	330069
12	112337362	rs9971746	T	C	0.17566	-0.0090107	0.0017538	2.78292e-07	330069
7	127594068	rs3808073	A	T	0.86374	0.008986	0.0017491	2.78484e-07	330069
12	112263873	rs57976537	C	T	0.17556	-0.0090084	0.0017535	2.78548e-07	330069
15	47954480	rs1435739	C	G	0.24305	0.0088841	0.0017293	2.78612e-07	330069
2	175028290	rs58610158	G	A	0.47817	0.0089866	0.0017492	2.78612e-07	330069
2	24337594	rs10865262	T	C	0.47661	0.0089663	0.0017453	2.78805e-07	330069
7	123717426	rs6961265	A	G	0.32289	0.0089134	0.0017351	2.79254e-07	330069
2	175028134	rs13429841	G	T	0.47818	0.0089853	0.0017492	2.79705e-07	330069
1	50505653	rs10888677	C	T	0.61595	0.0090366	0.0017594	2.80479e-07	330069
13	58828747	rs7332857	T	G	0.15466	0.0090623	0.0017644	2.80673e-07	330069
7	69868489	rs10279237	C	T	0.20523	0.009048	0.0017617	2.80737e-07	330069
12	112367921	rs16941759	A	G	0.17576	-0.0090085	0.001754	2.80867e-07	330069
2	175077179	rs10200448	C	A	0.47833	0.0089827	0.0017491	2.81514e-07	330069
6	97900538	rs35246285	C	G	0.26438	-0.0089241	0.0017377	2.81579e-07	330069
7	123704746	rs11489656	A	G	0.32782	0.0089351	0.0017399	2.81579e-07	330069
7	44835237	rs17860044	A	G	0.074044	-0.0088439	0.0017221	2.81644e-07	330069
9	86368660	rs7047907	A	G	0.73536	-0.0090522	0.0017627	2.81903e-07	330069
19	4074452	rs10419514	T	C	0.23062	-0.0092554	0.0018023	2.81968e-07	330069
12	112327142	rs73424286	A	G	0.17562	-0.0090062	0.001754	2.82618e-07	330069
2	201237345	rs10497857	T	G	0.33536	-0.0089375	0.0017406	2.82748e-07	330069
5	112252671	rs153563	C	T	0.47842	0.008969	0.0017468	2.82879e-07	330069
8	4849606	rs2977694	G	A	0.67574	0.0089246	0.0017382	2.83204e-07	330069
17	50337962	rs35798065	A	G	0.34413	0.0089173	0.0017368	2.83335e-07	330069
2	56442304	rs1119821	C	T	0.40429	0.0089663	0.0017464	2.83531e-07	330069
12	112418496	rs2339908	A	G	0.17471	-0.0090068	0.0017543	2.83596e-07	330069
12	112420128	rs12582376	G	C	0.17471	-0.0090067	0.0017543	2.83727e-07	330069
12	111705893	rs3858704	G	A	0.27095	-0.0093104	0.0018135	2.84053e-07	330069
7	123702529	rs7807763	A	G	0.32786	0.0089327	0.00174	2.84053e-07	330069
2	175036198	rs34132656	C	T	0.47826	0.0089802	0.0017493	2.84446e-07	330069
2	24358652	rs13035774	T	C	0.4702	0.0089601	0.0017456	2.85167e-07	330069
12	49455006	rs11168838	T	A	0.35456	0.0089406	0.0017418	2.85496e-07	330069
2	175027869	rs13390484	T	A	0.47876	0.0089785	0.0017494	2.8622e-07	330069
18	34808474	rs1662904	C	A	0.31728	-0.0090374	0.0017609	2.86286e-07	330069
15	47952613	rs1224675	A	G	0.75375	-0.0088915	0.0017324	2.86352e-07	330069
12	111706877	rs4766566	T	C	0.26943	-0.0093101	0.0018141	2.86814e-07	330069
1	209746329	rs9429999	A	T	0.27019	0.0089143	0.0017372	2.87607e-07	330069
9	86465402	rs9410888	A	G	0.25884	0.0090239	0.0017589	2.89268e-07	330069
12	112335217	rs10849981	T	A	0.17563	-0.0089974	0.0017539	2.89935e-07	330069
7	127592643	rs4731387	C	T	0.86216	0.0089799	0.0017505	2.90001e-07	330069
12	112416586	rs11066112	T	C	0.17466	-0.0089988	0.0017543	2.90603e-07	330069
19	4075283	rs7258426	G	C	0.22741	-0.0090829	0.0017707	2.90603e-07	330069
9	86658665	rs55692426	C	T	0.80863	-0.0089493	0.0017447	2.90804e-07	330069
2	201230258	rs35058285	A	G	0.33538	-0.0089284	0.0017406	2.90871e-07	330069
17	44286384	17:44286384_C_A	A	C	0.40004	0.0089507	0.0017451	2.91474e-07	330069
9	86661654	rs10780645	T	C	0.8078	-0.0089626	0.0017475	2.9181e-07	330069
6	97924978	rs35759029	A	G	0.26429	-0.0089126	0.0017378	2.92012e-07	330069
12	112363267	rs11066089	A	C	0.17571	-0.0089951	0.001754	2.9255e-07	330069
12	112367555	rs34028354	T	C	0.17571	-0.0089951	0.001754	2.9255e-07	330069
12	112346661	rs11066077	T	C	0.17571	-0.0089951	0.001754	2.92617e-07	330069
12	112347754	rs10849985	T	C	0.17571	-0.0089951	0.001754	2.92617e-07	330069
12	112347904	rs11066078	A	G	0.17571	-0.0089951	0.001754	2.92617e-07	330069
11	63976689	rs882147	A	T	0.42476	0.0089154	0.0017385	2.92685e-07	330069
2	76464500	rs1405343	G	A	0.5456	-0.0089943	0.0017539	2.92887e-07	330069
17	44084403	rs56087321	C	G	0.39073	0.0089442	0.0017442	2.93224e-07	330069
9	86657783	rs10868089	C	T	0.80917	-0.0089418	0.0017438	2.93359e-07	330069
7	127636958	rs17676986	T	C	0.136	-0.0089736	0.0017501	2.93562e-07	330069
12	112382251	rs7973309	C	T	0.17571	-0.0089939	0.001754	2.9363e-07	330069
12	112376157	rs3752631	G	A	0.17571	-0.0089938	0.001754	2.93697e-07	330069
12	112376597	rs7959619	A	G	0.17571	-0.0089938	0.001754	2.93697e-07	330069
12	112376949	rs7975437	G	A	0.17571	-0.0089938	0.001754	2.93697e-07	330069
12	112377537	rs11066095	T	C	0.17571	-0.0089938	0.001754	2.93697e-07	330069
12	112378768	rs7133881	C	A	0.17571	-0.0089938	0.001754	2.93697e-07	330069
12	112379271	rs7295665	C	T	0.17571	-0.0089938	0.001754	2.93697e-07	330069
12	112379587	rs7137889	G	A	0.17571	-0.0089938	0.001754	2.93697e-07	330069
12	112402950	rs56814171	T	G	0.1757	-0.0089937	0.001754	2.93697e-07	330069
12	112403813	rs12306814	C	T	0.1757	-0.0089937	0.001754	2.93697e-07	330069
9	86655687	rs4877817	G	A	0.80923	-0.0089415	0.0017438	2.93765e-07	330069
12	112358064	rs61612992	C	T	0.17571	-0.0089935	0.001754	2.939e-07	330069
12	112360168	rs7300320	A	G	0.17571	-0.0089935	0.001754	2.939e-07	330069
12	112361909	rs7295001	C	T	0.17571	-0.0089935	0.001754	2.939e-07	330069
12	112364028	rs12307393	A	T	0.17571	-0.0089935	0.001754	2.939e-07	330069
12	112408376	rs9971871	C	T	0.1757	-0.0089934	0.001754	2.939e-07	330069
9	86643088	rs10046912	C	T	0.80846	-0.0089464	0.0017449	2.94239e-07	330069
9	86661351	rs10780644	G	A	0.80915	-0.0089403	0.0017438	2.94578e-07	330069
3	170989251	rs2035913	T	C	0.44794	0.0089265	0.0017411	2.94713e-07	330069
12	112380470	rs73426362	C	G	0.17576	-0.0089921	0.001754	2.94917e-07	330069
11	63977546	rs12787945	A	G	0.42474	0.0089129	0.0017385	2.94985e-07	330069
12	112415179	rs11066111	T	A	0.17473	-0.0089928	0.0017543	2.95801e-07	330069
12	112348191	rs7136469	C	T	0.1757	-0.0089913	0.001754	2.95937e-07	330069
9	86656168	rs4430161	C	T	0.80923	-0.0089391	0.0017438	2.95937e-07	330069
2	175021180	rs10173054	A	G	0.47812	0.008966	0.0017491	2.96074e-07	330069
11	63985628	rs12420070	G	A	0.35755	0.0088905	0.0017345	2.96415e-07	330069
7	123707522	rs62473431	C	T	0.32779	0.0089182	0.0017399	2.96483e-07	330069
12	112404895	rs12423061	T	C	0.17568	-0.0089904	0.001754	2.96688e-07	330069
17	50335497	rs34783088	T	G	0.34345	0.0088979	0.001736	2.96893e-07	330069
9	86652199	rs10746728	G	A	0.80923	-0.0089382	0.0017439	2.96893e-07	330069
2	175023368	rs13018418	C	A	0.47815	0.0089649	0.0017491	2.97098e-07	330069
9	86650052	rs6559760	C	G	0.80923	-0.0089379	0.0017439	2.97167e-07	330069
12	112355899	rs57931035	C	T	0.17571	-0.0089898	0.001754	2.97235e-07	330069
17	50334959	rs12604025	T	C	0.34258	0.0088969	0.0017359	2.97235e-07	330069
12	112356735	rs12308660	A	G	0.1757	-0.0089897	0.001754	2.97303e-07	330069
2	174980339	rs17239377	A	C	0.40225	0.0089772	0.0017516	2.97303e-07	330069
2	174969200	rs11681721	C	T	0.34286	0.0088925	0.001735	2.97372e-07	330069
9	86660782	rs7853235	C	T	0.80916	-0.0089367	0.0017438	2.97783e-07	330069
12	112332283	rs7974772	T	C	0.17573	-0.0089882	0.0017538	2.9792e-07	330069
9	86656623	rs10868088	C	T	0.80923	-0.0089368	0.0017438	2.97989e-07	330069
7	123705314	rs1808281	A	G	0.32334	0.0088941	0.0017355	2.98057e-07	330069
12	111768973	rs6490055	G	A	0.25737	-0.0093855	0.0018315	2.98263e-07	330069
1	50159950	rs10888666	T	C	0.6161	0.009023	0.001761	2.99709e-07	330069
5	112253133	rs153561	G	A	0.47865	0.0089516	0.0017471	2.99916e-07	330069
7	123708520	rs11980182	C	A	0.32778	0.008914	0.0017399	3.00331e-07	330069
9	86659782	rs10746729	G	A	0.80916	-0.0089333	0.0017438	3.00885e-07	330069
12	112335539	rs10849982	A	G	0.17563	-0.0089849	0.0017539	3.01093e-07	330069
15	47951141	rs2573571	A	G	0.75373	-0.0088758	0.0017326	3.01093e-07	330069
17	44172812	rs60521849	A	G	0.39858	0.0089403	0.0017452	3.0137e-07	330069
12	112322777	rs12296574	C	T	0.17563	-0.0089848	0.0017539	3.01439e-07	330069
1	205767885	rs708727	A	G	0.39989	0.0089416	0.0017455	3.01439e-07	330069
2	175079262	rs7423096	T	C	0.47629	0.0089534	0.0017479	3.01648e-07	330069
11	63927695	rs11603192	G	A	0.35974	0.008883	0.0017343	3.02413e-07	330069
6	97905314	rs35389371	C	A	0.26434	-0.008901	0.0017378	3.02482e-07	330069
12	112273674	rs73422316	A	G	0.17553	-0.0089817	0.0017536	3.02761e-07	330069
12	111905245	rs73201772	T	C	0.11378	-0.0087854	0.0017153	3.0304e-07	330069
2	201239957	rs3754798	T	G	0.33535	-0.0089149	0.0017406	3.0304e-07	330069
17	50336550	rs67023391	G	A	0.34362	0.008892	0.0017362	3.0311e-07	330069
6	97908467	rs34688770	A	C	0.26434	-0.0089004	0.0017378	3.0311e-07	330069
7	127554107	rs3757767	G	C	0.86383	0.0089581	0.0017491	3.03319e-07	330069
12	112272981	rs12306710	T	C	0.17554	-0.0089806	0.0017536	3.03669e-07	330069
12	112380372	rs80017658	A	G	0.17561	-0.0089828	0.001754	3.03669e-07	330069
6	97906884	rs17231825	C	T	0.26433	-0.0088997	0.0017378	3.03739e-07	330069
12	112347728	rs10849984	C	T	0.17571	-0.0089826	0.001754	3.03948e-07	330069
11	63930467	rs2701533	C	T	0.42433	0.0089089	0.0017397	3.04089e-07	330069
18	67183379	rs6566428	A	G	0.20256	0.0088692	0.0017319	3.04159e-07	330069
12	112318734	rs16941703	T	C	0.17565	-0.0089791	0.0017536	3.0493e-07	330069
12	112323582	rs1981517	G	A	0.17563	-0.0089803	0.0017539	3.05351e-07	330069
1	205774897	rs823075	T	C	0.39901	0.0089351	0.0017451	3.05492e-07	330069
12	112273500	rs7488629	A	G	0.1755	-0.0089786	0.0017536	3.05562e-07	330069
12	112274236	rs7970881	C	T	0.17551	-0.0089784	0.0017536	3.05914e-07	330069
18	34828475	rs11661840	C	T	0.34573	-0.0090214	0.0017621	3.06126e-07	330069
1	49923197	rs6588349	G	C	0.62455	0.0090188	0.0017616	3.06267e-07	330069
17	50333704	rs66715932	G	T	0.35602	0.0088909	0.0017367	3.0662e-07	330069
19	4042808	rs75366827	C	G	0.15323	-0.0088502	0.0017288	3.07114e-07	330069
19	4074448	rs10419502	G	C	0.23014	-0.0092208	0.0018013	3.07185e-07	330069
7	127553025	rs3808084	G	A	0.86395	0.0089534	0.001749	3.07256e-07	330069
17	50334971	rs12602550	G	T	0.34259	0.008885	0.0017359	3.08177e-07	330069
6	97908951	rs62422084	C	A	0.26434	-0.0088945	0.0017378	3.08532e-07	330069
12	112328587	rs7973713	G	A	0.17563	-0.0089767	0.0017539	3.08816e-07	330069
2	175077188	rs10200513	G	A	0.47691	0.0089476	0.0017484	3.09457e-07	330069
12	112276464	rs7314870	C	T	0.17552	-0.0089741	0.0017537	3.10027e-07	330069
12	112275745	rs76122743	A	C	0.17551	-0.0089739	0.0017537	3.1017e-07	330069
18	67184193	rs4611561	G	C	0.20264	0.0088624	0.001732	3.1067e-07	330069
12	112275973	rs73422318	T	C	0.17551	-0.0089732	0.0017537	3.10885e-07	330069
12	112278025	rs2879603	G	A	0.17553	-0.0089731	0.0017537	3.11028e-07	330069
9	86646572	rs10868083	T	G	0.80856	-0.0089273	0.0017448	3.11172e-07	330069
12	112277576	rs3177647	T	C	0.17555	-0.0089726	0.0017537	3.1153e-07	330069
12	112313795	rs7297883	G	A	0.17551	-0.008972	0.0017536	3.1153e-07	330069
12	112319398	rs7961704	C	T	0.1755	-0.008972	0.0017536	3.1153e-07	330069
3	23222509	rs7430140	A	C	0.71274	0.0088646	0.0017326	3.1153e-07	330069
12	112318997	rs61440627	C	T	0.1755	-0.0089716	0.0017536	3.11889e-07	330069
2	174971459	rs57679676	A	G	0.34528	0.0088749	0.0017347	3.11889e-07	330069
17	44179095	rs113564729	A	G	0.39884	0.00893	0.0017455	3.11961e-07	330069
12	112300780	rs7976557	C	T	0.1755	-0.0089715	0.0017536	3.12033e-07	330069
12	112303481	rs2879604	A	G	0.1755	-0.0089715	0.0017536	3.12033e-07	330069
12	112313688	rs7297760	C	A	0.1755	-0.0089714	0.0017536	3.12033e-07	330069
12	112315172	rs12426566	C	T	0.1755	-0.0089714	0.0017536	3.12033e-07	330069
12	112316774	rs2097701	G	T	0.1755	-0.0089714	0.0017536	3.12033e-07	330069
12	112306165	rs11066054	T	G	0.1755	-0.0089713	0.0017536	3.12176e-07	330069
12	112315102	rs12426554	C	T	0.1755	-0.0089713	0.0017536	3.12248e-07	330069
12	112317096	rs7294623	A	G	0.1755	-0.0089712	0.0017536	3.1232e-07	330069
12	112317320	rs11066058	C	T	0.1755	-0.0089712	0.0017536	3.1232e-07	330069
17	50334350	rs34865566	G	T	0.35614	0.0088848	0.0017368	3.12608e-07	330069
1	67487376	rs61780038	A	C	0.5514	0.0089881	0.0017569	3.12608e-07	330069
12	112280773	rs3213628	T	G	0.17551	-0.008971	0.0017536	3.12752e-07	330069
7	44856371	rs117759664	T	C	0.07399	-0.0088	0.0017202	3.12896e-07	330069
7	44855205	rs55937725	A	G	0.073994	-0.0087999	0.0017202	3.1304e-07	330069
12	112293996	rs57427612	G	C	0.17552	-0.0089707	0.0017537	3.13256e-07	330069
12	112297568	rs7309505	C	G	0.1755	-0.0089701	0.0017536	3.13329e-07	330069
7	44861991	rs62460513	A	G	0.073964	-0.0087991	0.0017201	3.13401e-07	330069
7	44843973	rs62460496	T	C	0.074207	-0.0088062	0.0017216	3.13545e-07	330069
12	112293616	rs79453676	C	T	0.17552	-0.0089703	0.0017537	3.13617e-07	330069
12	112410920	rs60217649	T	C	0.17476	-0.0089732	0.0017543	3.13906e-07	330069
13	58828369	rs7328411	C	T	0.15492	0.0090271	0.0017648	3.13906e-07	330069
12	112281384	rs7980569	A	G	0.17552	-0.0089698	0.0017537	3.14196e-07	330069
2	201224637	rs17531631	T	G	0.33654	-0.0089038	0.0017408	3.1434e-07	330069
11	63981507	rs60452247	A	G	0.35683	0.0088718	0.0017346	3.14557e-07	330069
12	112290651	rs12307365	C	G	0.17552	-0.0089694	0.0017537	3.14557e-07	330069
12	112291242	rs6489817	C	A	0.17552	-0.0089694	0.0017537	3.14557e-07	330069
12	112281493	rs7970847	C	T	0.17552	-0.0089692	0.0017537	3.14702e-07	330069
12	112282583	rs3782885	A	G	0.17552	-0.0089692	0.0017537	3.14702e-07	330069
12	112283546	rs11066044	T	C	0.17552	-0.0089692	0.0017537	3.14702e-07	330069
12	112284380	rs7306566	A	G	0.17552	-0.0089692	0.0017537	3.14702e-07	330069
12	112284491	rs7307625	T	C	0.17552	-0.0089692	0.0017537	3.14702e-07	330069
12	112285591	rs2158030	C	T	0.17552	-0.0089692	0.0017537	3.14702e-07	330069
12	112286796	rs7315642	C	G	0.17552	-0.0089692	0.0017537	3.14702e-07	330069
12	112287344	rs7134084	A	G	0.17552	-0.0089692	0.0017537	3.14702e-07	330069
12	112288089	rs7135919	T	C	0.17552	-0.0089692	0.0017537	3.14702e-07	330069
12	112288179	rs12302040	A	G	0.17552	-0.0089692	0.0017537	3.14702e-07	330069
12	112288202	rs12322899	G	A	0.17552	-0.0089692	0.0017537	3.14702e-07	330069
12	112288827	rs60661425	T	C	0.17552	-0.0089692	0.0017537	3.14702e-07	330069
12	112290346	rs12307192	T	G	0.17552	-0.0089692	0.0017537	3.14702e-07	330069
12	112291416	rs7306262	T	G	0.17552	-0.0089692	0.0017537	3.14702e-07	330069
12	112291476	rs7295727	C	T	0.17552	-0.0089692	0.0017537	3.14702e-07	330069
12	112291844	rs7296199	C	T	0.17552	-0.0089692	0.0017537	3.14702e-07	330069
12	112292147	rs12313385	G	C	0.17552	-0.0089692	0.0017537	3.14702e-07	330069
12	112292470	rs7310605	A	G	0.17552	-0.0089692	0.0017537	3.14702e-07	330069
12	112283551	rs11066045	A	C	0.17552	-0.0089691	0.0017537	3.14775e-07	330069
12	112283881	rs11066046	C	T	0.17552	-0.0089691	0.0017537	3.14775e-07	330069
17	50337904	rs56114165	C	T	0.34411	0.0088827	0.0017368	3.14775e-07	330069
1	50509362	rs12140239	G	C	0.61592	0.0089973	0.0017593	3.15428e-07	330069
7	44856472	rs62460506	T	C	0.073998	-0.0087973	0.0017202	3.15428e-07	330069
9	86648904	rs7024628	A	G	0.80918	-0.0089173	0.0017439	3.16373e-07	330069
7	32965040	rs12701264	G	A	0.9049	-0.0088894	0.0017384	3.16592e-07	330069
12	112407438	rs112426410	G	A	0.17476	-0.0089703	0.0017543	3.16665e-07	330069
2	24325805	rs6733127	A	G	0.4697	0.0089193	0.0017444	3.16957e-07	330069
12	112388431	rs7973337	G	A	0.17477	-0.00897	0.0017543	3.17176e-07	330069
12	112394022	rs12579298	T	G	0.17476	-0.0089698	0.0017543	3.17249e-07	330069
12	112395239	rs7965368	T	C	0.17476	-0.0089698	0.0017543	3.17249e-07	330069
12	112398188	rs12305655	C	T	0.17476	-0.0089698	0.0017543	3.17249e-07	330069
12	112398451	rs12305667	G	A	0.17476	-0.0089698	0.0017543	3.17249e-07	330069
12	112395121	rs58552361	A	G	0.17476	-0.0089696	0.0017543	3.17322e-07	330069
12	112397064	rs7959723	C	T	0.17476	-0.0089696	0.0017543	3.17322e-07	330069
12	112400166	rs7974550	C	T	0.17476	-0.0089696	0.0017543	3.17322e-07	330069
12	112410077	rs1016078	A	C	0.17476	-0.0089696	0.0017543	3.17322e-07	330069
12	112410186	rs1016079	G	T	0.17476	-0.0089696	0.0017543	3.17322e-07	330069
12	112406771	rs9971833	G	T	0.17476	-0.0089695	0.0017543	3.17395e-07	330069
7	44856171	rs113921163	T	C	0.074001	-0.0087953	0.0017202	3.17468e-07	330069
6	97916243	rs17297787	G	A	0.26432	-0.0088837	0.0017378	3.1886e-07	330069
2	24489054	rs12469585	T	A	0.57823	0.008916	0.0017442	3.19521e-07	330069
17	50336294	rs55678658	T	C	0.34355	0.0088741	0.0017362	3.20037e-07	330069
7	44853084	rs138703214	A	T	0.074006	-0.0087929	0.0017203	3.20037e-07	330069
18	34822770	rs1786071	A	G	0.3174	-0.0089975	0.0017603	3.20184e-07	330069
3	23180573	rs9876201	A	G	0.59791	-0.0089802	0.001757	3.20184e-07	330069
7	44841924	rs17860094	G	T	0.074195	-0.0087983	0.0017215	3.20701e-07	330069
16	56265405	rs929872	G	A	0.57666	0.0088921	0.0017399	3.21144e-07	330069
7	44852689	rs56041103	A	G	0.074008	-0.0087916	0.0017203	3.21366e-07	330069
17	50335972	rs12600773	T	C	0.34345	0.0088725	0.0017361	3.21514e-07	330069
11	63975331	rs2515241	T	C	0.35971	0.008867	0.0017351	3.21736e-07	330069
2	172904520	rs62183819	T	G	0.61489	0.0089849	0.0017583	3.22404e-07	330069
7	44859996	rs143092829	A	G	0.073978	-0.0087894	0.0017201	3.22701e-07	330069
10	61177973	rs551170370	C	T	0.00053727	0.0087676	0.0017159	3.22775e-07	330069
1	49949006	rs1933271	T	C	0.62454	0.0090014	0.0017616	3.22775e-07	330069
17	50335807	rs72836094	C	T	0.34346	0.0088708	0.0017362	3.23221e-07	330069
12	112342410	rs73426310	G	A	0.17574	-0.0089617	0.001754	3.23519e-07	330069
6	97915394	rs17297752	A	C	0.26431	-0.0088787	0.0017378	3.23668e-07	330069
7	44861907	rs62460512	T	C	0.073966	-0.0087878	0.0017201	3.24564e-07	330069
7	44855251	rs55939721	C	T	0.073997	-0.0087876	0.0017203	3.25237e-07	330069
5	112103646	rs436108	A	C	0.026146	0.0087814	0.0017192	3.25762e-07	330069
1	49798902	rs12408156	C	A	0.57706	0.0090208	0.0017661	3.26137e-07	330069
2	172564438	rs12997093	C	T	0.57946	0.0089614	0.0017545	3.26137e-07	330069
2	174941439	rs10930632	A	G	0.40157	0.0089419	0.0017507	3.26287e-07	330069
17	50338487	rs9807075	C	T	0.34417	0.0088706	0.0017369	3.27115e-07	330069
12	49402393	rs10875910	C	G	0.35432	0.0088892	0.0017407	3.27944e-07	330069
3	177189993	rs11705870	C	G	0.58276	0.0088756	0.001738	3.2802e-07	330069
17	50337531	rs12947303	G	T	0.34412	0.0088689	0.0017368	3.28322e-07	330069
17	50336656	rs67125304	G	A	0.34079	0.0088662	0.0017363	3.28398e-07	330069
2	24546542	rs2702042	T	C	0.35249	-0.0088864	0.0017402	3.28473e-07	330069
7	44854358	rs55800061	G	C	0.07402	-0.0087843	0.0017202	3.28473e-07	330069
17	50336663	rs67243747	T	C	0.34073	0.0088658	0.0017363	3.28927e-07	330069
2	172553999	rs34242651	A	G	0.57763	0.0089709	0.0017569	3.28927e-07	330069
12	112339843	rs3741998	G	A	0.17573	-0.0089552	0.001754	3.29913e-07	330069
12	112340734	rs12319165	G	A	0.17573	-0.0089552	0.001754	3.29913e-07	330069
7	32957661	rs4723222	G	A	0.90457	-0.0088896	0.0017413	3.30674e-07	330069
7	44861118	rs62460511	T	C	0.073959	-0.0087815	0.0017201	3.30826e-07	330069
12	112343374	rs12427012	A	G	0.17574	-0.0089542	0.001754	3.30902e-07	330069
12	112344119	rs12316525	C	T	0.17574	-0.0089542	0.001754	3.30902e-07	330069
3	23230756	rs9850944	A	C	0.60642	0.0088862	0.0017407	3.30902e-07	330069
12	112294373	rs35704336	G	T	0.17624	-0.008955	0.0017543	3.31818e-07	330069
12	112339015	rs12321677	A	G	0.17573	-0.0089531	0.001754	3.31894e-07	330069
12	112345056	rs73426314	C	T	0.17574	-0.0089533	0.001754	3.31894e-07	330069
12	112345634	rs12582302	G	A	0.17574	-0.0089533	0.001754	3.31894e-07	330069
17	50338258	rs9807073	C	T	0.34419	0.0088638	0.0017368	3.33734e-07	330069
17	50338821	rs9807095	C	T	0.34416	0.0088637	0.0017369	3.34041e-07	330069
11	63959259	rs4980524	C	A	0.42483	0.0088715	0.0017385	3.34811e-07	330069
7	44843280	rs17860104	G	C	0.074195	-0.0087825	0.0017215	3.37054e-07	330069
6	128333682	rs13197257	T	G	0.26879	-0.008853	0.0017354	3.3721e-07	330069
19	19577451	rs117315649	A	G	0.0098352	-0.0086584	0.0016973	3.37443e-07	330069
6	97872694	rs62420654	A	C	0.26629	-0.0088696	0.0017387	3.37754e-07	330069
19	4074697	rs11880023	T	C	0.2306	-0.0091851	0.0018008	3.3861e-07	330069
12	111884608	rs3184504	C	T	0.5365	-0.0089875	0.0017621	3.39156e-07	330069
11	63910116	rs7938819	A	G	0.57312	-0.0088639	0.001738	3.39782e-07	330069
7	69872379	rs7804672	A	G	0.20449	0.0089731	0.0017594	3.3986e-07	330069
12	10834300	rs10772351	A	G	0.42989	-0.0088729	0.0017399	3.40173e-07	330069
3	84825374	rs1584861	A	G	0.626	-0.0088874	0.0017427	3.40408e-07	330069
1	49899702	rs11205625	A	G	0.54984	0.0089832	0.0017616	3.408e-07	330069
18	67184951	rs6566429	C	T	0.20259	0.0088318	0.001732	3.41114e-07	330069
2	175081543	rs4471857	G	C	0.47872	0.0089184	0.001749	3.41429e-07	330069
17	50335405	rs12936892	T	A	0.34339	0.0088519	0.001736	3.41586e-07	330069
7	44817728	rs55935340	G	A	0.073816	-0.0087805	0.0017221	3.42295e-07	330069
2	175081701	rs7602008	G	A	0.47872	0.0089173	0.001749	3.42452e-07	330069
18	67185619	rs12967304	C	T	0.2026	0.0088304	0.001732	3.42531e-07	330069
2	175074207	rs6433468	C	T	0.47821	0.0089164	0.0017491	3.44191e-07	330069
5	112252258	rs149191	G	A	0.48084	0.0089325	0.0017523	3.4435e-07	330069
2	175074016	rs6433467	G	T	0.47821	0.0089152	0.0017491	3.45382e-07	330069
16	56213398	rs1734194	T	C	0.52737	0.0088751	0.0017414	3.46258e-07	330069
11	46704106	rs9704782	T	G	0.26636	0.0089495	0.001756	3.46338e-07	330069
16	51449543	rs41318749	T	C	0.29425	0.0088317	0.0017331	3.47456e-07	330069
2	175055312	rs10930649	T	C	0.47819	0.0089137	0.0017492	3.47536e-07	330069
11	63942189	rs7111753	G	A	0.35916	0.0088384	0.0017345	3.47616e-07	330069
7	69857987	rs10276442	C	A	0.20553	0.0089773	0.0017617	3.47616e-07	330069
2	175070878	rs4144329	G	A	0.47823	0.0089132	0.0017492	3.47696e-07	330069
1	183402201	rs12074081	A	G	0.43751	-0.008884	0.0017434	3.47776e-07	330069
2	59989406	rs10779946	G	T	0.58568	0.0088744	0.0017416	3.47856e-07	330069
6	97866319	rs35241090	A	T	0.26618	-0.0088593	0.0017386	3.47856e-07	330069
2	175062465	rs7608405	C	T	0.47822	0.0089131	0.0017492	3.48097e-07	330069
6	97865979	rs62420652	T	C	0.26618	-0.0088587	0.0017386	3.48498e-07	330069
5	112135067	rs517947	C	T	0.9738	-0.0087586	0.001719	3.48578e-07	330069
2	174971471	rs59556168	A	G	0.34524	0.008838	0.0017346	3.4898e-07	330069
2	24432620	rs2303294	G	A	0.62829	0.0088721	0.0017414	3.49221e-07	330069
2	175057466	rs10193118	T	C	0.47818	0.0089117	0.0017492	3.49462e-07	330069
2	175057489	rs10193195	T	C	0.47818	0.0089117	0.0017492	3.49462e-07	330069
2	174960254	rs12476833	T	C	0.40048	0.0089121	0.0017494	3.49865e-07	330069
7	44814616	rs62460480	G	A	0.074251	-0.0087721	0.0017219	3.49865e-07	330069
11	63956718	rs3888316	A	G	0.35682	0.0088362	0.0017345	3.50348e-07	330069
2	175059683	rs4972642	T	C	0.47821	0.0089106	0.0017492	3.50671e-07	330069
2	175059701	rs4972643	T	C	0.47821	0.0089106	0.0017492	3.50671e-07	330069
2	175059767	rs4972434	A	C	0.47821	0.0089106	0.0017492	3.50671e-07	330069
2	175071404	rs4972644	C	G	0.47824	0.00891	0.0017492	3.50994e-07	330069
2	175071775	rs1025785	A	G	0.47824	0.00891	0.0017492	3.50994e-07	330069
7	44819240	rs112942650	T	A	0.073901	-0.0087727	0.0017223	3.5148e-07	330069
3	23239459	rs6550744	A	G	0.60608	0.0088663	0.0017407	3.51803e-07	330069
12	49439521	rs34436857	G	A	0.35634	0.0088649	0.0017406	3.52696e-07	330069
16	56219380	rs1190746	T	G	0.52738	0.0088678	0.0017413	3.53509e-07	330069
18	67185105	rs6566430	G	T	0.20257	0.0088196	0.001732	3.54079e-07	330069
17	44175489	rs8065825	G	A	0.39848	0.0088867	0.0017454	3.55304e-07	330069
2	175071465	rs10930655	G	A	0.47817	0.0089055	0.0017491	3.55713e-07	330069
2	175063513	rs10930654	G	T	0.47822	0.0089058	0.0017492	3.55959e-07	330069
2	175068849	rs67242464	G	T	0.4782	0.0089054	0.0017492	3.56041e-07	330069
16	56264815	rs1824797	C	G	0.59894	0.0088497	0.0017383	3.56205e-07	330069
16	56212664	rs1190749	G	T	0.52731	0.0088651	0.0017414	3.56944e-07	330069
2	175058024	rs10930651	G	A	0.47875	0.0089054	0.0017494	3.56944e-07	330069
16	56187512	rs1211838	T	A	0.47646	-0.0088643	0.0017413	3.57026e-07	330069
11	63964657	rs2236648	T	C	0.4248	0.0088506	0.0017386	3.57191e-07	330069
2	24479057	rs11676939	T	C	0.57823	0.0088801	0.0017445	3.57355e-07	330069
2	175051846	rs4972641	C	T	0.47819	0.0089044	0.0017492	3.57355e-07	330069
11	63893694	rs645461	T	C	0.57311	-0.0088472	0.001738	3.57602e-07	330069
2	24526265	rs60716082	A	T	0.3535	-0.0088598	0.0017406	3.58179e-07	330069
2	175052632	rs6741764	C	T	0.47822	0.0089032	0.0017492	3.58757e-07	330069
2	175052904	rs6758405	G	A	0.47822	0.0089032	0.0017492	3.58757e-07	330069
12	111696528	rs2339717	C	T	0.27602	-0.0092618	0.0018197	3.58839e-07	330069
7	127529241	rs3808087	G	A	0.86375	0.0089054	0.0017497	3.58839e-07	330069
2	172564094	rs34531723	C	A	0.57961	0.0089287	0.0017545	3.60081e-07	330069
2	174937467	rs3739152	C	T	0.48067	0.008889	0.0017467	3.60164e-07	330069
2	175053845	rs13024211	T	C	0.47877	0.0089025	0.0017494	3.60247e-07	330069
2	172651287	rs3770458	T	C	0.57905	0.0089358	0.0017559	3.6033e-07	330069
2	175072876	rs6710641	T	C	0.47734	0.0088982	0.0017486	3.6033e-07	330069
2	175058366	rs10930653	C	G	0.47878	0.0089023	0.0017494	3.60496e-07	330069
2	175065499	rs6715651	G	T	0.47821	0.0089005	0.0017492	3.61493e-07	330069
2	175066386	rs11693036	G	C	0.47821	0.0089005	0.0017492	3.61493e-07	330069
13	58258094	rs9537776	A	G	0.4278	-0.008864	0.0017421	3.6191e-07	330069
19	4024525	rs72976952	A	G	0.15621	-0.0088005	0.0017296	3.61993e-07	330069
19	4076272	rs10407757	G	C	0.22749	-0.0090091	0.0017707	3.62577e-07	330069
5	94206390	rs293058	T	C	0.23975	-0.008771	0.001724	3.6266e-07	330069
16	56214615	rs1668321	C	A	0.52731	0.0088598	0.0017414	3.62744e-07	330069
3	108099860	rs7635040	C	T	0.11173	-0.0087215	0.0017143	3.62827e-07	330069
2	175067873	rs2033869	T	C	0.4782	0.0088987	0.0017492	3.63496e-07	330069
2	175068358	rs10497413	T	C	0.47878	0.0088991	0.0017494	3.63831e-07	330069
2	172622527	rs6723259	C	A	0.5814	0.0089384	0.0017572	3.64586e-07	330069
7	44813369	rs56119332	G	A	0.074283	-0.0087587	0.001722	3.65006e-07	330069
2	175062017	rs10191904	A	G	0.47878	0.0088981	0.0017494	3.65174e-07	330069
12	112313216	rs11066055	T	A	0.17605	-0.0089535	0.0017603	3.65258e-07	330069
12	112274741	rs7953874	T	C	0.17588	-0.0089169	0.0017532	3.65511e-07	330069
17	44221843	17:44221843_A_G	G	A	0.39886	0.0088755	0.0017452	3.66522e-07	330069
12	112295693	rs7956495	G	T	0.17598	-0.0089208	0.0017542	3.67113e-07	330069
7	44840259	rs12702088	G	A	0.92236	0.0089284	0.0017557	3.67113e-07	330069
11	63954370	rs2845597	A	G	0.35987	0.008824	0.0017352	3.67367e-07	330069
21	24288848	rs115898021	C	T	0.00053039	0.14149	0.027828	3.68553e-07	330069
15	47946762	rs77609223	G	C	0.2429	0.0087934	0.0017295	3.68978e-07	330069
2	175065358	rs6757482	A	C	0.47879	0.0088942	0.0017494	3.69403e-07	330069
16	56222482	rs1190748	G	A	0.5274	0.0088526	0.0017412	3.69658e-07	330069
2	24503766	rs34504814	T	C	0.35344	-0.0088474	0.0017403	3.70254e-07	330069
6	97842747	rs35906570	A	C	0.26619	-0.0088385	0.0017387	3.70681e-07	330069
3	23179483	rs11129108	C	T	0.60066	-0.0089322	0.0017573	3.71621e-07	330069
2	172569824	rs10930491	G	A	0.57925	0.0089254	0.0017559	3.71706e-07	330069
11	63907079	rs7112960	G	A	0.35872	0.0088149	0.0017342	3.71792e-07	330069
2	175075507	rs6747866	G	A	0.47819	0.0088891	0.0017489	3.72563e-07	330069
17	44284600	rs11654982	A	G	0.39616	0.008881	0.0017474	3.72992e-07	330069
2	172586714	rs2292816	C	G	0.57858	0.0089301	0.0017571	3.72992e-07	330069
7	32968342	rs2060730	C	T	0.90592	-0.0088011	0.0017317	3.72992e-07	330069
7	127502020	rs1362268	C	G	0.86515	0.0088969	0.0017506	3.73078e-07	330069
11	63907301	rs7948329	A	G	0.56472	-0.0088316	0.0017378	3.73594e-07	330069
6	97871638	rs62420653	C	T	0.266	-0.0088359	0.0017386	3.73594e-07	330069
6	97856824	rs62420650	G	A	0.26623	-0.0088344	0.0017386	3.75059e-07	330069
2	175080507	rs2358484	C	T	0.47878	0.0088872	0.0017491	3.75751e-07	330069
12	112375990	rs3752630	C	A	0.17599	-0.0089101	0.0017539	3.77311e-07	330069
12	10839017	rs10772352	G	A	0.46389	-0.0088559	0.0017433	3.7792e-07	330069
6	97857171	rs13194314	C	G	0.26623	-0.0088318	0.0017386	3.78007e-07	330069
17	74696446	rs7211963	T	C	0.47531	0.0088643	0.0017454	3.80102e-07	330069
9	104891099	rs373983290	T	C	0.0015802	0.0087173	0.0017165	3.80715e-07	330069
17	44185479	rs8070420	T	G	0.39845	0.0088639	0.0017454	3.8089e-07	330069
1	183399613	rs1338373	A	G	0.43722	-0.008854	0.0017436	3.81593e-07	330069
2	175060639	rs1550387	C	G	0.47871	0.0088832	0.0017494	3.81593e-07	330069
2	175076329	rs7573921	A	G	0.47878	0.0088822	0.0017491	3.81593e-07	330069
2	175079597	rs4563190	G	A	0.47878	0.0088813	0.0017491	3.82472e-07	330069
12	112324846	rs12423041	C	T	0.17383	-0.0089079	0.0017545	3.83089e-07	330069
2	174953595	rs1562312	C	T	0.48437	0.0088669	0.0017464	3.83266e-07	330069
12	49434074	rs10747559	A	C	0.41971	0.008845	0.0017421	3.83354e-07	330069
4	118323613	rs17865011	G	A	0.12241	-0.0087491	0.0017233	3.83531e-07	330069
2	175079503	rs4488627	C	A	0.47878	0.0088804	0.0017491	3.83619e-07	330069
2	175050342	rs2884471	G	A	0.47818	0.0088808	0.0017493	3.84149e-07	330069
2	56439314	rs1030090	T	C	0.2763	-0.0087743	0.0017284	3.84326e-07	330069
11	46349103	rs11038864	A	G	0.19626	0.0088039	0.0017343	3.84946e-07	330069
7	127514450	rs1419969	A	T	0.8656	0.0088779	0.0017491	3.86456e-07	330069
3	171019237	rs12696318	A	G	0.41217	0.0088298	0.0017397	3.86545e-07	330069
2	175077961	rs10180256	A	G	0.47718	0.008873	0.0017483	3.87079e-07	330069
4	118318170	rs17861853	C	T	0.12242	-0.0087462	0.0017233	3.87079e-07	330069
5	111983180	rs6882143	C	T	0.22409	0.0088085	0.0017356	3.87347e-07	330069
6	17522986	rs7760870	C	T	0.2566	-0.0090011	0.0017737	3.8824e-07	330069
2	172890588	rs10930502	G	A	0.3018	-0.0088458	0.0017431	3.88419e-07	330069
6	97844065	rs35228286	A	G	0.26617	-0.0088225	0.0017387	3.89224e-07	330069
18	67186169	rs1545248	G	T	0.19982	0.0087443	0.0017233	3.89404e-07	330069
12	112007756	rs653178	T	C	0.53579	-0.008942	0.0017623	3.89493e-07	330069
17	74697031	rs7212823	T	C	0.47652	0.0088495	0.001744	3.89493e-07	330069
5	112102356	rs2431510	T	C	0.026092	0.0087028	0.0017153	3.90301e-07	330069
2	24563646	rs7597919	G	A	0.57921	0.0088474	0.0017438	3.90751e-07	330069
2	172558328	rs62184165	G	A	0.57846	0.0089141	0.001757	3.91021e-07	330069
4	118320277	rs6839566	G	A	0.12241	-0.0087425	0.0017233	3.91471e-07	330069
2	174936181	rs2884442	A	T	0.40363	0.0088717	0.0017488	3.91832e-07	330069
11	63910980	rs12418535	G	A	0.35882	0.0087978	0.0017343	3.91922e-07	330069
3	23231457	rs9875663	G	T	0.71817	0.0087882	0.0017325	3.93007e-07	330069
6	17526592	rs34145200	G	A	0.25651	-0.0089944	0.0017734	3.94094e-07	330069
6	97858551	rs67894915	A	G	0.2662	-0.0088173	0.0017386	3.95094e-07	330069
12	49436724	rs12580349	G	A	0.35645	0.0088261	0.0017406	3.96552e-07	330069
1	6863773	rs11122155	A	T	0.15863	-0.0088635	0.0017481	3.97558e-07	330069
17	44098797	rs916896	T	C	0.39121	0.008846	0.0017447	3.97649e-07	330069
2	174939168	rs6737629	T	C	0.40488	0.0088749	0.0017505	3.98199e-07	330069
17	44247017	rs7206949	A	C	0.39916	0.008847	0.0017451	3.98566e-07	330069
1	183401215	rs10752912	A	G	0.43723	-0.008839	0.0017436	3.99301e-07	330069
16	56170609	rs11640373	T	C	0.35316	-0.0088005	0.0017361	3.99669e-07	330069
4	118317862	rs17861851	C	T	0.1221	-0.0087287	0.001722	4.00129e-07	330069
11	63909228	rs7102177	C	T	0.3588	0.0087897	0.0017342	4.01421e-07	330069
1	96884006	rs653958	G	A	0.3651	-0.0088267	0.0017415	4.01421e-07	330069
9	86663514	rs930340	A	G	0.80944	-0.0088289	0.001742	4.01606e-07	330069
7	127494325	rs1833147	G	A	0.86549	0.0088646	0.0017491	4.01976e-07	330069
5	112159385	rs2545160	G	A	0.97356	-0.0087127	0.0017193	4.02903e-07	330069
3	23138392	rs4858057	G	A	0.6586	-0.0088371	0.0017439	4.03274e-07	330069
5	94206202	rs159032	T	C	0.23968	-0.0087359	0.001724	4.03645e-07	330069
16	56198096	rs1010050	T	C	0.4727	-0.0088238	0.0017414	4.04297e-07	330069
17	74695986	rs34122063	A	G	0.47528	0.0088436	0.0017453	4.0439e-07	330069
2	24576240	rs11125549	T	C	0.62904	0.0088139	0.0017395	4.0439e-07	330069
4	118332442	rs17861880	C	G	0.12244	-0.0087315	0.0017233	4.05135e-07	330069
17	44189270	rs56807059	C	A	0.3986	0.0088435	0.0017455	4.05229e-07	330069
13	58586236	rs7320068	A	G	0.46423	0.0088335	0.0017436	4.05882e-07	330069
18	34830966	rs1786061	G	A	0.34545	-0.0089268	0.001762	4.05882e-07	330069
16	56181491	rs12924617	G	C	0.4717	-0.0088265	0.0017423	4.06537e-07	330069
16	56186560	rs1210081	T	G	0.47272	-0.0088218	0.0017414	4.06912e-07	330069
17	44116843	rs16940845	A	C	0.39362	0.008841	0.0017453	4.07474e-07	330069
2	172659376	rs17581284	T	C	0.57948	0.0088924	0.0017555	4.07568e-07	330069
16	56186242	rs1151262	C	T	0.47272	-0.0088212	0.0017414	4.07662e-07	330069
16	56187723	rs1210078	T	C	0.47272	-0.008821	0.0017414	4.07943e-07	330069
2	24476118	rs13033241	C	G	0.62817	0.008821	0.0017415	4.08037e-07	330069
17	74695700	rs28615790	A	G	0.47529	0.0088391	0.0017453	4.09732e-07	330069
2	172701157	rs2271758	G	T	0.58407	0.0088783	0.0017532	4.10299e-07	330069
16	56170173	rs11076141	T	G	0.47269	-0.0088187	0.0017414	4.10582e-07	330069
1	49829596	rs1890288	T	C	0.60539	0.0089043	0.0017583	4.10677e-07	330069
16	56173794	rs7203705	A	G	0.47271	-0.0088181	0.0017414	4.11434e-07	330069
7	69896093	rs55815007	G	T	0.20612	0.0089394	0.0017655	4.11908e-07	330069
2	174948246	rs13414103	C	T	0.48447	0.0088424	0.0017464	4.12287e-07	330069
2	23956799	rs2042481	T	C	0.40709	0.008844	0.0017467	4.12382e-07	330069
2	24441698	rs10165445	T	C	0.62825	0.008817	0.0017414	4.12572e-07	330069
16	56195435	rs1151260	T	C	0.4727	-0.0088168	0.0017414	4.12952e-07	330069
17	50335054	rs12936024	G	A	0.34425	0.0087896	0.0017361	4.13428e-07	330069
5	112255219	rs153559	T	C	0.4603	0.0088134	0.0017409	4.13904e-07	330069
12	112326123	rs2269801	C	T	0.17579	-0.0088783	0.0017539	4.14859e-07	330069
7	44821430	rs55886325	T	C	0.074078	-0.0087156	0.0017219	4.15719e-07	330069
17	44041992	rs62063287	T	G	0.21915	0.0087696	0.0017326	4.16102e-07	330069
2	24434345	rs6746005	A	G	0.62823	0.0088134	0.0017415	4.17542e-07	330069
2	172628120	rs11690807	A	G	0.57859	0.0088916	0.001757	4.17734e-07	330069
17	50335110	rs12952482	G	C	0.3442	0.0087862	0.0017361	4.1783e-07	330069
16	56208243	rs7187026	C	T	0.52729	0.0088124	0.0017414	4.18504e-07	330069
16	56188494	rs1190653	G	A	0.47278	-0.0088118	0.0017415	4.19469e-07	330069
9	76833279	rs10869352	G	C	0.67174	0.0088739	0.0017538	4.19662e-07	330069
2	24441883	rs6707781	G	T	0.62823	0.0088112	0.0017414	4.19952e-07	330069
16	56205932	rs1734195	A	G	0.52729	0.0088105	0.0017414	4.20824e-07	330069
2	175080894	rs2119138	C	T	0.47878	0.0088493	0.0017491	4.20824e-07	330069
16	56175379	rs8052869	T	C	0.47269	-0.0088103	0.0017415	4.21308e-07	330069
7	69897826	rs10275122	G	A	0.20653	0.0089312	0.0017654	4.21794e-07	330069
16	56208410	rs2443047	C	T	0.52729	0.0088096	0.0017414	4.22085e-07	330069
16	56208600	rs2443046	A	G	0.52728	0.0088094	0.0017414	4.2228e-07	330069
1	96884810	rs4245663	C	T	0.36513	-0.0088098	0.0017415	4.22474e-07	330069
2	24570358	rs6741216	T	C	0.62813	0.0088064	0.0017409	4.22766e-07	330069
2	24524958	rs7603997	T	C	0.35219	-0.0088045	0.0017406	4.23156e-07	330069
1	97447183	rs10493889	C	T	0.083078	0.0088073	0.0017412	4.2335e-07	330069
16	56207333	rs2244969	G	A	0.52728	0.008808	0.0017414	4.23936e-07	330069
2	172813218	rs4280427	A	G	0.54293	0.0088682	0.0017534	4.24815e-07	330069
2	174949358	rs11694601	G	A	0.40533	0.0088523	0.0017504	4.25598e-07	330069
6	17525967	rs12661089	A	G	0.25652	-0.0089683	0.0017734	4.25991e-07	330069
7	44856513	rs62460507	G	A	0.073802	-0.0087003	0.0017205	4.26285e-07	330069
1	49977965	rs1933270	G	T	0.62522	0.008909	0.0017618	4.26481e-07	330069
8	4840711	rs2924724	T	G	0.67826	0.0088031	0.0017409	4.27071e-07	330069
19	4037966	rs72976977	C	T	0.15271	-0.0087373	0.0017279	4.27169e-07	330069
6	17525619	rs6938240	C	T	0.25652	-0.008967	0.0017734	4.27661e-07	330069
1	49998239	rs10788914	T	C	0.62526	0.0089079	0.0017618	4.28351e-07	330069
17	50333733	rs67596067	A	G	0.34323	0.0087767	0.001736	4.28746e-07	330069
6	130552744	rs12194348	T	G	0.28423	-0.0088591	0.0017523	4.29141e-07	330069
6	97849801	rs34816217	C	G	0.26621	-0.0087898	0.0017386	4.2924e-07	330069
1	6883959	rs12091373	A	G	0.15896	-0.0088399	0.0017487	4.3013e-07	330069
5	111981633	rs13160012	G	C	0.75858	-0.0088908	0.0017589	4.31023e-07	330069
17	50333646	rs66815943	A	G	0.34335	0.008775	0.001736	4.31122e-07	330069
6	17525453	rs6938022	C	T	0.25655	-0.0089644	0.0017735	4.3132e-07	330069
2	174935806	rs11682068	G	A	0.40625	0.0088461	0.0017503	4.32514e-07	330069
1	209732278	rs9429816	C	T	0.27712	0.0087748	0.001737	4.37925e-07	330069
3	23178848	rs3884563	G	A	0.59816	-0.0088742	0.0017567	4.38026e-07	330069
1	49850066	rs12040168	A	C	0.57582	0.008924	0.0017667	4.39238e-07	330069
2	174935842	rs11682078	G	A	0.40621	0.0088397	0.0017503	4.41164e-07	330069
1	96886108	rs586415	A	G	0.36512	-0.0087942	0.0017415	4.42792e-07	330069
16	56199305	rs1975634	G	C	0.47258	-0.0087926	0.0017414	4.43915e-07	330069
5	112252066	rs149192	T	C	0.46298	0.0088078	0.0017444	4.44222e-07	330069
1	96885498	rs2151619	C	T	0.36512	-0.008793	0.0017415	4.44427e-07	330069
19	4031769	rs72976966	T	C	0.1578	-0.00872	0.0017273	4.45554e-07	330069
4	89475042	rs112273646	T	C	0.15243	0.0087022	0.0017237	4.45656e-07	330069
13	58574116	rs9527750	A	T	0.4636	0.0088059	0.0017445	4.47198e-07	330069
4	89463196	rs140335528	A	G	0.15324	0.0086953	0.0017226	4.47507e-07	330069
4	89461624	rs59143108	A	G	0.15328	0.0086949	0.0017226	4.47816e-07	330069
2	24490413	rs4268898	T	C	0.627	0.0087893	0.0017413	4.48126e-07	330069
4	89462762	rs6815502	T	C	0.15324	0.0086947	0.0017226	4.48229e-07	330069
7	69867459	rs6460544	C	T	0.20642	0.0088998	0.0017635	4.49987e-07	330069
2	200996851	rs72932280	C	G	0.2001	0.0087432	0.0017325	4.50091e-07	330069
16	56131978	rs56340425	G	C	0.47425	-0.0087887	0.0017417	4.51024e-07	330069
9	76833808	rs4581117	A	C	0.67172	0.0088503	0.0017539	4.51128e-07	330069
4	89470295	rs78011872	C	A	0.15363	0.008701	0.0017243	4.51232e-07	330069
2	200998950	rs13029537	C	T	0.19851	0.0087236	0.0017288	4.5144e-07	330069
9	76880486	rs10781210	C	T	0.67038	0.0089046	0.0017648	4.52064e-07	330069
2	174953295	rs4246616	T	C	0.48424	0.0088119	0.0017464	4.52168e-07	330069
12	112326138	rs2269802	G	A	0.17584	-0.0088493	0.0017538	4.52272e-07	330069
17	50334160	rs34539488	G	A	0.34329	0.0087589	0.001736	4.52585e-07	330069
2	174936851	rs12466788	C	T	0.48451	0.0088106	0.0017462	4.52585e-07	330069
2	174937278	rs3739153	A	G	0.48439	0.0088106	0.0017463	4.52689e-07	330069
19	4040407	rs72976979	T	C	0.15249	-0.0087172	0.0017278	4.53419e-07	330069
2	172833107	rs62183766	T	C	0.54525	0.0088423	0.0017527	4.53942e-07	330069
7	69877806	rs11762973	G	A	0.20607	0.0089064	0.0017654	4.54046e-07	330069
2	200997916	rs12996313	T	C	0.19836	0.0087203	0.0017286	4.54151e-07	330069
9	76833477	rs4313217	G	A	0.67173	0.0088467	0.0017537	4.54569e-07	330069
10	70324448	rs10998279	G	A	0.13017	0.0087989	0.0017446	4.57509e-07	330069
12	111932800	rs7137828	T	C	0.53559	-0.008888	0.0017624	4.57931e-07	330069
12	111734121	rs11610256	T	C	0.23483	-0.0091884	0.0018221	4.59092e-07	330069
6	97944162	rs62422089	G	C	0.27098	-0.0087622	0.0017377	4.59727e-07	330069
19	4031330	rs56220456	C	T	0.15775	-0.0087093	0.0017273	4.60363e-07	330069
13	58620105	rs636690	T	C	0.46434	0.0087903	0.0017435	4.61636e-07	330069
2	24364557	rs6545302	T	G	0.35946	-0.0087652	0.0017388	4.63234e-07	330069
16	7761736	rs72778533	T	G	0.097011	0.0086095	0.0017083	4.65908e-07	330069
1	49816443	rs35185599	G	C	0.57635	0.0088993	0.0017659	4.66659e-07	330069
1	6864187	rs11122156	C	T	0.15738	-0.0087834	0.0017431	4.68598e-07	330069
1	96886504	rs545152	T	C	0.36512	-0.0087752	0.0017415	4.68705e-07	330069
17	44013235	rs11867549	G	A	0.26191	-0.0086836	0.0017235	4.6957e-07	330069
16	56134336	rs2111111	C	T	0.47427	-0.0087737	0.0017417	4.71737e-07	330069
1	49818224	rs12043096	T	G	0.57652	0.008895	0.0017658	4.72389e-07	330069
6	97946396	rs10499013	A	G	0.27083	-0.0087522	0.0017376	4.73369e-07	330069
1	6867842	rs12735232	C	T	0.15889	-0.0088052	0.0017483	4.74133e-07	330069
7	32879070	rs112363448	A	C	0.086498	0.0087612	0.0017396	4.74679e-07	330069
11	46070935	rs61882549	T	C	0.031639	0.0085934	0.0017064	4.75335e-07	330069
3	23240519	rs1032499	T	C	0.61822	0.0087464	0.0017368	4.75992e-07	330069
5	112193877	rs2909788	G	A	0.97412	-0.0086517	0.001718	4.75992e-07	330069
2	201000776	rs1105964	A	T	0.20019	0.008727	0.0017331	4.76541e-07	330069
5	112260973	rs467660	A	G	0.48067	0.0088295	0.0017534	4.76541e-07	330069
19	4083916	rs67820526	A	G	0.17956	-0.0087482	0.0017377	4.79844e-07	330069
3	23239870	rs4858482	A	G	0.61823	0.0087439	0.0017369	4.79844e-07	330069
3	177210765	rs1566413	T	G	0.61055	0.0087666	0.0017415	4.80507e-07	330069
17	50334040	rs35310651	A	C	0.34324	0.008738	0.001736	4.81948e-07	330069
2	200999256	rs12613687	T	C	0.19832	0.0087007	0.0017286	4.82059e-07	330069
16	56180471	rs6499825	A	G	0.47253	-0.008764	0.0017414	4.84172e-07	330069
12	112200150	rs2013002	C	T	0.60222	-0.0088109	0.001751	4.85624e-07	330069
19	4077096	rs7251928	C	A	0.23196	-0.0090805	0.0018046	4.86407e-07	330069
3	84900877	rs62122	C	T	0.24338	0.0088325	0.0017556	4.88315e-07	330069
6	97944199	rs62422090	G	A	0.2709	-0.0087407	0.0017377	4.90682e-07	330069
2	241364669	rs140870884	T	C	0.016099	0.0084947	0.0016889	4.91247e-07	330069
1	96898897	rs11165628	C	A	0.37002	-0.0087593	0.0017419	4.93969e-07	330069
8	4836752	rs10088688	T	A	0.68242	0.0087405	0.0017382	4.9488e-07	330069
2	172785163	rs62182436	T	C	0.54341	0.0088189	0.0017542	4.97966e-07	330069
17	74697528	rs1476788	A	C	0.47766	0.0087644	0.0017436	4.99344e-07	330069
19	4030116	rs111459971	C	G	0.15776	-0.0086816	0.0017273	5.00956e-07	330069
17	44041987	rs62063286	C	T	0.21897	0.0087071	0.0017325	5.01649e-07	330069
6	97825847	rs140644236	A	G	0.2668	-0.0087375	0.0017386	5.02227e-07	330069
8	4838022	rs4875427	A	G	0.68097	0.0087342	0.0017381	5.03037e-07	330069
17	44236005	17:44236005_C_T	T	C	0.39891	0.0087688	0.001745	5.03733e-07	330069
9	76837711	rs11143856	A	G	0.66917	0.0088524	0.0017617	5.04081e-07	330069
16	51442634	rs35287272	T	C	0.28175	0.0087092	0.0017333	5.04778e-07	330069
2	201219230	rs6720374	A	C	0.33549	-0.0087462	0.0017407	5.0501e-07	330069
2	172657439	rs35854151	A	G	0.57905	0.0088216	0.0017557	5.05126e-07	330069
1	49907720	rs12731743	G	A	0.57412	0.0089059	0.0017725	5.05359e-07	330069
17	50297907	rs56222435	G	A	0.33816	0.0087074	0.0017332	5.06524e-07	330069
16	56130376	rs8058394	A	C	0.47434	-0.0087497	0.0017416	5.06757e-07	330069
1	6907856	rs71631805	T	C	0.15876	-0.0087811	0.001748	5.07575e-07	330069
13	58275138	rs9527684	G	A	0.41995	-0.0087553	0.0017432	5.09918e-07	330069
1	49816560	rs12725943	C	T	0.5742	0.0088982	0.0017716	5.10152e-07	330069
9	76878188	rs10781208	C	T	0.66965	0.0088397	0.00176	5.10152e-07	330069
9	76838212	rs11562383	T	A	0.66934	0.0088367	0.0017597	5.12743e-07	330069
17	50298413	rs35217539	C	T	0.34711	0.0087049	0.0017338	5.15347e-07	330069
9	76832777	rs4510928	T	G	0.66872	0.0088548	0.0017637	5.15347e-07	330069
1	49762418	rs1431638	T	C	0.62188	0.0088379	0.0017604	5.1606e-07	330069
19	4040305	rs10402864	G	A	0.16568	-0.0090664	0.001806	5.16535e-07	330069
9	76837114	rs4431652	C	T	0.66967	0.0088338	0.0017598	5.17726e-07	330069
6	130753588	rs11154580	A	G	0.3087	-0.0089948	0.0017921	5.19039e-07	330069
1	96885607	rs2151621	C	T	0.36364	-0.0087412	0.0017415	5.19159e-07	330069
9	76838210	rs11531870	G	C	0.66941	0.0088318	0.0017598	5.20355e-07	330069
2	24436112	rs10195436	T	C	0.62862	0.0087398	0.0017414	5.20475e-07	330069
9	76845071	rs4745303	G	T	0.6697	0.0088298	0.0017596	5.22276e-07	330069
3	23349496	rs4858496	C	G	0.34867	-0.0087329	0.0017404	5.22878e-07	330069
11	99086508	rs11218881	C	T	0.16895	0.008681	0.00173	5.22998e-07	330069
9	76839177	rs11496714	G	A	0.66973	0.0088305	0.0017599	5.23239e-07	330069
11	47184117	rs10838662	G	T	0.23145	0.0087652	0.0017469	5.23721e-07	330069
4	118319901	rs6838944	T	C	0.12136	-0.0086227	0.0017186	5.24445e-07	330069
9	86531175	rs10868070	A	G	0.27035	0.0088368	0.0017614	5.24928e-07	330069
16	56120350	rs8051535	G	C	0.47525	-0.0087383	0.0017418	5.25775e-07	330069
9	76840223	rs61609646	C	G	0.66967	0.0088285	0.0017598	5.25896e-07	330069
6	27384520	rs6929812	C	T	0.53761	0.0087708	0.0017483	5.26138e-07	330069
1	96891615	rs509770	A	G	0.28314	-0.008707	0.0017357	5.26381e-07	330069
6	97804911	rs35927298	T	G	0.26685	-0.0087214	0.0017387	5.27473e-07	330069
6	97803962	rs13209986	C	A	0.26685	-0.0087213	0.0017387	5.27716e-07	330069
6	97803634	rs4839910	A	G	0.26685	-0.008721	0.0017387	5.28202e-07	330069
9	76837250	rs13299683	T	A	0.66966	0.0088267	0.0017598	5.2881e-07	330069
2	201212791	rs17447186	G	A	0.3366	-0.0087327	0.0017411	5.28932e-07	330069
2	24425099	rs4665671	T	G	0.66093	0.0087362	0.001742	5.30274e-07	330069
9	76835248	rs11143853	G	A	0.66963	0.0088257	0.0017598	5.30396e-07	330069
4	89473400	rs6853971	T	C	0.15323	0.0086409	0.001723	5.3064e-07	330069
4	89473550	rs6854187	T	C	0.15323	0.0086408	0.001723	5.30762e-07	330069
15	47948404	rs75566936	A	G	0.24268	0.0086723	0.0017293	5.31129e-07	330069
17	44556830	rs155739	G	A	0.2197	0.0088708	0.001769	5.31496e-07	330069
19	4029784	rs72976960	G	A	0.15788	-0.008662	0.0017273	5.31618e-07	330069
7	112184563	rs143759156	T	C	0.016113	0.0084299	0.0016811	5.31986e-07	330069
18	40957588	rs75082984	C	T	0.066718	0.0085232	0.0016999	5.33826e-07	330069
1	96886549	rs545282	T	C	0.36512	-0.0087312	0.0017415	5.34687e-07	330069
5	94215894	rs159029	C	T	0.24101	-0.0086451	0.0017244	5.34811e-07	330069
9	76844977	rs10869356	G	A	0.66973	0.0088209	0.0017596	5.36167e-07	330069
1	6906171	rs12035477	G	C	0.15895	-0.0087667	0.0017488	5.3629e-07	330069
10	12945180	rs35741360	A	G	0.27496	0.0086824	0.0017321	5.36785e-07	330069
1	50564416	rs12743369	G	A	0.55711	0.0088561	0.0017668	5.37403e-07	330069
12	49645240	rs11168936	C	T	0.3609	0.0089327	0.0017821	5.38022e-07	330069
18	67184881	rs12961588	T	C	0.19853	0.0086265	0.0017211	5.38022e-07	330069
2	24123539	rs17711796	T	C	0.40614	0.0087475	0.0017452	5.38022e-07	330069
9	76846169	rs12376645	G	C	0.6697	0.0088198	0.0017596	5.38146e-07	330069
9	76845775	rs4507836	T	A	0.66971	0.0088197	0.0017596	5.3827e-07	330069
9	76835752	rs34607999	G	C	0.66963	0.0088202	0.0017598	5.39014e-07	330069
2	201022952	rs10931888	G	T	0.19826	0.0086638	0.0017287	5.39759e-07	330069
6	97821038	rs60241377	A	C	0.26678	-0.0087133	0.0017386	5.39759e-07	330069
9	76845371	rs4745304	G	A	0.6697	0.0088186	0.0017596	5.40008e-07	330069
1	207968257	rs14374	C	T	0.050196	0.0085443	0.0017051	5.42001e-07	330069
11	46088828	rs17787417	G	C	0.031704	0.0085498	0.0017063	5.4275e-07	330069
9	76878532	rs10869368	A	G	0.66976	0.0088186	0.00176	5.43e-07	330069
6	97814397	rs13214188	C	G	0.26678	-0.0087112	0.0017386	5.4325e-07	330069
9	76839717	rs11515742	T	G	0.6697	0.0088176	0.0017599	5.43501e-07	330069
6	97811877	rs62420638	C	T	0.26678	-0.008711	0.0017386	5.43751e-07	330069
9	76846751	rs4551433	C	T	0.66957	0.0088156	0.0017596	5.44879e-07	330069
2	59936079	rs197086	T	C	0.40852	0.0087349	0.0017438	5.47268e-07	330069
9	86504005	rs13289566	T	C	0.21573	0.0087284	0.0017426	5.48151e-07	330069
1	96891855	rs663771	G	C	0.2833	-0.0086928	0.0017356	5.48403e-07	330069
9	76847825	rs7850643	G	C	0.66958	0.0088127	0.0017596	5.49414e-07	330069
15	47925959	rs74561350	T	C	0.23966	0.0086706	0.0017314	5.50681e-07	330069
3	84861390	rs1268959	C	G	0.072291	0.008847	0.0017668	5.51696e-07	330069
16	78570882	rs549245859	T	C	0.0011855	0.0084364	0.0016849	5.52713e-07	330069
4	89477002	rs11929822	G	A	0.15243	0.0086311	0.0017238	5.53223e-07	330069
1	208023885	rs80052475	C	T	0.069783	0.0085114	0.0016999	5.53605e-07	330069
9	76876634	rs11143881	C	T	0.6686	0.0088343	0.0017644	5.53605e-07	330069
5	94221160	rs159352	G	C	0.23982	-0.0086316	0.001724	5.53988e-07	330069
3	84862120	rs1248835	T	G	0.070799	0.0087939	0.0017565	5.54243e-07	330069
3	84867056	rs1248830	A	C	0.073091	0.0088933	0.0017764	5.55137e-07	330069
1	6848505	rs11122148	A	C	0.15728	-0.0087255	0.001743	5.56032e-07	330069
1	96892099	rs12030271	G	A	0.28327	-0.0086876	0.0017356	5.57314e-07	330069
2	175058330	rs10930652	G	C	0.47581	0.0087485	0.0017478	5.57442e-07	330069
2	172626552	rs1607254	G	A	0.58276	0.0087838	0.0017549	5.58342e-07	330069
10	70320236	rs58627364	T	C	0.1288	0.0087295	0.0017441	5.5847e-07	330069
22	32741919	rs28578592	C	G	0.001439	0.045585	0.0091083	5.595e-07	330069
2	172541378	rs17614941	C	T	0.57884	0.0087929	0.001757	5.60661e-07	330069
6	97818572	rs2126394	T	C	0.2667	-0.0086999	0.0017385	5.61177e-07	330069
2	24110089	rs12463543	A	G	0.40619	0.0087327	0.0017451	5.61436e-07	330069
2	201245550	rs3769454	G	C	0.32221	-0.0086971	0.001738	5.61824e-07	330069
4	89471290	rs113671931	C	A	0.15329	0.0086227	0.0017232	5.62212e-07	330069
6	97833962	rs62420645	G	A	0.26692	-0.0086997	0.0017386	5.62471e-07	330069
8	4836291	rs4272399	A	C	0.31724	-0.008695	0.0017378	5.63248e-07	330069
1	96893914	rs602272	A	G	0.28331	-0.0086833	0.0017356	5.64417e-07	330069
9	76870598	rs2376052	A	G	0.66976	0.0088056	0.00176	5.64417e-07	330069
2	175093533	rs6707192	C	T	0.47208	0.0087505	0.0017491	5.64937e-07	330069
6	97818371	rs17807469	T	A	0.26671	-0.0086978	0.0017386	5.64937e-07	330069
3	177206819	rs4857695	G	A	0.61086	0.0087105	0.0017411	5.65067e-07	330069
9	76846419	rs10869357	C	T	0.66963	0.0088026	0.0017596	5.65718e-07	330069
15	47947718	rs76563988	G	A	0.24343	0.0086515	0.0017295	5.66761e-07	330069
11	47158392	rs11601798	G	A	0.2327	0.0087471	0.0017488	5.68329e-07	330069
17	44235827	17:44235827_C_A	A	C	0.39537	0.0087393	0.0017473	5.6846e-07	330069
9	76844557	rs10869355	C	T	0.66978	0.0088014	0.0017597	5.6846e-07	330069
9	76840361	rs34879485	G	A	0.66915	0.0088117	0.0017618	5.68984e-07	330069
12	112813415	rs7959696	C	T	0.18995	-0.0093023	0.0018601	5.70821e-07	330069
9	76867920	rs1840415	C	G	0.66978	0.0088009	0.00176	5.72005e-07	330069
6	130766349	rs4897424	A	G	0.31817	-0.0089432	0.0017886	5.73324e-07	330069
3	177209504	rs10936944	A	C	0.61071	0.0087078	0.0017415	5.73456e-07	330069
16	56129334	rs1592542	G	A	0.47422	-0.008708	0.0017417	5.74116e-07	330069
1	96885600	rs2151620	A	G	0.36343	-0.0087073	0.0017415	5.74381e-07	330069
16	56131243	rs7184466	C	A	0.4741	-0.0087088	0.0017419	5.74778e-07	330069
8	4837440	rs4521778	G	C	0.67896	0.0086922	0.0017388	5.76634e-07	330069
16	56132674	rs2008084	T	C	0.47389	-0.0087072	0.0017419	5.77165e-07	330069
1	96892268	rs7543671	C	T	0.28331	-0.0086756	0.0017356	5.77431e-07	330069
1	96892427	rs7551466	T	G	0.28331	-0.0086757	0.0017356	5.77431e-07	330069
1	96892216	rs7543590	C	T	0.28331	-0.0086753	0.0017356	5.78096e-07	330069
12	38328696	rs10880262	T	C	0.42846	-0.0087256	0.0017457	5.78496e-07	330069
16	56130305	rs8063380	C	T	0.47424	-0.0087054	0.0017417	5.78762e-07	330069
5	174687482	rs10057481	T	C	0.45186	-0.0086854	0.0017378	5.79696e-07	330069
13	58372963	rs6561944	C	T	0.41665	-0.008708	0.0017423	5.79963e-07	330069
16	56116746	rs1530817	G	A	0.4751	-0.0087052	0.0017418	5.8023e-07	330069
11	46961227	rs11039031	A	G	0.74695	-0.0090205	0.001805	5.80898e-07	330069
11	46744925	rs2070852	C	G	0.67962	-0.0089001	0.0017809	5.81032e-07	330069
3	23228826	rs9868645	T	G	0.61323	0.0086958	0.0017401	5.81567e-07	330069
6	97778418	rs56044068	A	G	0.26681	-0.0086884	0.0017387	5.82237e-07	330069
6	97778504	rs56233909	T	C	0.26681	-0.0086884	0.0017387	5.82237e-07	330069
2	24570695	rs55863105	T	C	0.5767	0.0087228	0.0017456	5.82371e-07	330069
2	24558242	rs34125395	T	C	0.57547	0.0087221	0.0017455	5.82774e-07	330069
16	56129656	rs7499559	T	C	0.47401	-0.0087031	0.0017418	5.84252e-07	330069
16	56129189	rs1592545	T	C	0.47423	-0.0087017	0.0017417	5.84925e-07	330069
11	46750638	rs2282686	C	T	0.31861	0.0088545	0.0017723	5.85059e-07	330069
16	56129245	rs1592543	G	A	0.47423	-0.0087013	0.0017417	5.85599e-07	330069
9	76869918	rs4745310	A	G	0.6697	0.0087927	0.00176	5.86138e-07	330069
6	97779380	rs17807164	A	T	0.26681	-0.008686	0.0017387	5.86408e-07	330069
6	97780258	rs13220643	T	C	0.26681	-0.0086857	0.0017387	5.86813e-07	330069
6	97780983	rs62420620	T	C	0.26681	-0.0086857	0.0017387	5.86949e-07	330069
9	76846687	rs4427236	A	C	0.66958	0.0087904	0.0017596	5.86949e-07	330069
7	32979205	rs6944185	G	A	0.91386	-0.0086812	0.0017378	5.87489e-07	330069
13	58280885	rs7328666	T	C	0.41868	-0.0087094	0.0017435	5.87625e-07	330069
12	112083162	rs11065991	T	C	0.39906	0.0087466	0.0017511	5.88979e-07	330069
9	76875611	rs1869672	C	T	0.66973	0.0087914	0.0017601	5.88979e-07	330069
9	76876450	rs2168234	C	T	0.66972	0.0087913	0.0017601	5.88979e-07	330069
3	84866497	rs1248831	C	T	0.07316	0.008873	0.0017765	5.89794e-07	330069
7	32977041	rs7786806	C	T	0.91387	-0.0086797	0.0017378	5.89929e-07	330069
7	69881811	rs10452740	G	A	0.20546	0.0088147	0.0017649	5.90337e-07	330069
9	76872628	rs2889274	C	T	0.66973	0.00879	0.0017601	5.91562e-07	330069
9	76875225	rs62553274	A	T	0.66973	0.0087899	0.0017601	5.91562e-07	330069
9	76875291	rs11143880	T	A	0.66973	0.00879	0.0017601	5.91562e-07	330069
1	96903731	rs12037166	A	C	0.37016	-0.0086971	0.0017418	5.94292e-07	330069
9	76877117	rs7018485	T	C	0.66975	0.0087881	0.0017601	5.94566e-07	330069
22	32734584	rs150318220	C	A	0.0014364	0.045538	0.0091205	5.94977e-07	330069
11	47174062	rs10501319	A	G	0.23327	0.0087359	0.0017499	5.9676e-07	330069
9	76842507	rs11143859	G	A	0.66897	0.0087999	0.0017628	5.97585e-07	330069
8	4825809	rs4875419	T	G	0.58045	0.0087029	0.0017434	5.97861e-07	330069
9	76878815	rs11143884	A	G	0.66972	0.0087853	0.00176	5.98963e-07	330069
1	96906260	rs722156	G	T	0.37017	-0.0086943	0.0017418	5.99239e-07	330069
12	112817847	rs7311681	G	T	0.18972	-0.0092839	0.00186	5.99791e-07	330069
3	23226579	rs28712166	C	G	0.61463	0.0086752	0.0017381	6.00067e-07	330069
13	58675682	rs506751	T	A	0.4786	0.0086968	0.0017424	6.00206e-07	330069
19	4034154	rs55837899	A	G	0.1539	-0.0086238	0.0017278	6.00759e-07	330069
9	76848975	rs1455039	A	G	0.66992	0.0087797	0.0017591	6.01035e-07	330069
5	94212620	rs159030	C	A	0.24158	-0.0086072	0.0017246	6.01174e-07	330069
6	130548156	rs4897380	C	G	0.33163	-0.0088977	0.0017828	6.01451e-07	330069
6	97793150	rs34349028	T	C	0.26679	-0.0086771	0.0017387	6.02005e-07	330069
6	97784461	rs35417611	A	T	0.26681	-0.0086762	0.0017387	6.03671e-07	330069
3	177200618	rs7611741	T	G	0.61082	0.0086881	0.0017411	6.03949e-07	330069
9	76878607	rs10869369	G	C	0.66969	0.0087823	0.00176	6.04227e-07	330069
9	76878887	rs11143885	A	G	0.66972	0.0087822	0.00176	6.04505e-07	330069
13	58372849	rs7331960	G	A	0.41669	-0.0086931	0.0017422	6.05202e-07	330069
17	1246876	rs77987645	G	C	0.07886	-0.0086332	0.0017303	6.06317e-07	330069
6	130544509	rs4895867	C	T	0.32988	-0.0088468	0.0017733	6.07575e-07	330069
1	6944804	rs950493	C	T	0.16031	-0.0087518	0.0017543	6.07995e-07	330069
2	172838117	rs62183770	G	C	0.54339	0.0087518	0.0017544	6.08695e-07	330069
9	76872516	rs2376051	A	G	0.66908	0.0087784	0.0017599	6.09818e-07	330069
17	74703582	rs9914041	T	C	0.47754	0.008698	0.0017438	6.10801e-07	330069
3	23228974	rs9868692	T	C	0.61342	0.0086786	0.00174	6.11646e-07	330069
2	175086115	rs9332424	T	C	0.47216	0.0087213	0.001749	6.15177e-07	330069
9	76880039	rs12686728	A	G	0.67057	0.0087995	0.0017647	6.15886e-07	330069
9	76869217	rs2376053	T	C	0.66978	0.0087759	0.00176	6.16027e-07	330069
6	97764445	rs10499010	G	A	0.26676	-0.0086661	0.0017381	6.16595e-07	330069
9	76878353	rs10781209	G	A	0.66871	0.008796	0.0017642	6.16879e-07	330069
3	57545993	rs7618684	C	A	0.34196	-0.0087343	0.0017518	6.17305e-07	330069
2	24502305	rs55642516	G	A	0.35467	-0.008677	0.0017404	6.1759e-07	330069
9	76845880	rs11143862	G	T	0.66976	0.0087731	0.0017597	6.17874e-07	330069
3	71129879	rs17008195	T	C	0.12947	0.0087606	0.0017572	6.18159e-07	330069
17	44087500	rs41543317	G	A	0.61401	-0.0087034	0.0017458	6.18871e-07	330069
9	76845606	rs4507835	T	A	0.66976	0.0087724	0.0017597	6.19156e-07	330069
12	112273499	rs11513729	T	C	0.39695	0.0087272	0.0017511	6.23591e-07	330069
11	47167789	rs61897787	A	G	0.23275	0.0087153	0.0017488	6.2431e-07	330069
9	76842541	rs11143860	T	A	0.66976	0.0087695	0.0017597	6.24597e-07	330069
7	32980802	rs7806770	C	T	0.91392	-0.0086585	0.0017375	6.24885e-07	330069
15	48077925	rs4775714	G	A	0.27328	-0.0087445	0.0017548	6.25893e-07	330069
15	48079952	rs16960121	T	C	0.27331	-0.0087433	0.0017548	6.27769e-07	330069
11	47164208	rs923324	C	G	0.76742	-0.0087123	0.0017487	6.29071e-07	330069
2	24357657	rs7580772	C	T	0.35943	-0.0086649	0.0017392	6.29071e-07	330069
3	177196081	rs1995242	T	C	0.6165	0.0086662	0.0017395	6.29216e-07	330069
13	58561602	rs9537901	G	A	0.46359	0.0086913	0.0017446	6.29941e-07	330069
17	6356597	rs4796499	A	G	0.55531	0.0086804	0.0017425	6.30957e-07	330069
11	47217883	rs7130006	C	A	0.26201	0.008701	0.0017467	6.31539e-07	330069
2	172838074	rs62183769	C	A	0.54364	0.0087407	0.0017547	6.31539e-07	330069
13	58561700	rs9537902	A	T	0.46358	0.0086903	0.0017446	6.31975e-07	330069
3	171019789	rs6781150	A	T	0.4626	0.0086773	0.001742	6.32121e-07	330069
2	24434424	rs2111882	G	A	0.64723	0.008662	0.0017392	6.346e-07	330069
1	96891552	rs509588	C	G	0.2816	-0.0086436	0.0017356	6.35331e-07	330069
2	172537212	rs12052995	G	A	0.57882	0.0087503	0.001757	6.35331e-07	330069
3	177197095	rs6769095	T	C	0.61092	0.0086625	0.0017395	6.36796e-07	330069
2	175096409	rs4425051	T	A	0.47198	0.0087092	0.001749	6.37529e-07	330069
8	4836670	rs10101412	C	G	0.6732	0.0086765	0.0017425	6.38557e-07	330069
13	58561496	rs9537899	A	T	0.46358	0.0086866	0.0017446	6.38999e-07	330069
6	130552958	rs6569670	G	T	0.33173	-0.0088761	0.0017828	6.4003e-07	330069
17	1243621	rs4790419	T	C	0.081462	-0.0086435	0.0017363	6.42244e-07	330069
4	26520267	rs141854496	T	C	0.00093849	0.028313	0.0056881	6.44466e-07	330069
7	32991756	rs113676412	A	G	0.086067	0.0086479	0.0017374	6.44466e-07	330069
12	112179471	rs4766897	C	T	0.67648	-0.0086311	0.0017341	6.44911e-07	330069
11	45058125	rs1872277	G	A	0.62483	0.008652	0.0017383	6.45357e-07	330069
1	67365089	rs1925409	C	T	0.64232	0.0087593	0.0017599	6.45803e-07	330069
9	76879228	rs12555450	A	G	0.66985	0.0087595	0.00176	6.46249e-07	330069
10	12930184	rs33978631	A	G	0.28984	0.008621	0.0017322	6.46398e-07	330069
18	25482752	rs187347133	C	G	0.0011215	0.0087181	0.0017517	6.46398e-07	330069
9	76867437	rs1378279	A	C	0.66972	0.008759	0.00176	6.46845e-07	330069
1	208024884	rs79287268	A	G	0.069749	0.0084587	0.0016998	6.48037e-07	330069
17	44109474	rs7220988	A	G	0.39464	0.0086866	0.0017457	6.49681e-07	330069
1	96884286	rs2011694	A	T	0.2778	-0.0086362	0.0017358	6.51328e-07	330069
2	24357463	rs7589717	A	G	0.35929	-0.0086533	0.0017392	6.51628e-07	330069
13	58257427	rs9537775	T	C	0.42783	-0.0086699	0.0017426	6.51929e-07	330069
10	12944646	rs35859988	T	C	0.27513	0.0086164	0.0017319	6.5268e-07	330069
1	49755114	rs7514767	A	G	0.57056	0.0087875	0.0017663	6.5283e-07	330069
2	44689669	rs698796	A	C	0.67913	0.008722	0.0017533	6.54034e-07	330069
7	32999507	rs78811678	T	C	0.085516	0.0086404	0.001737	6.5539e-07	330069
17	44119051	rs7213077	C	T	0.39439	0.0086832	0.0017457	6.55994e-07	330069
10	12928676	rs34826516	A	T	0.2899	0.0086159	0.0017322	6.56599e-07	330069
11	47196982	rs2279439	T	C	0.23445	0.0086901	0.0017472	6.56901e-07	330069
8	4840669	rs2924723	A	G	0.68165	0.0086453	0.0017382	6.57204e-07	330069
12	112040904	rs11613633	A	C	0.16921	-0.0087688	0.0017632	6.5887e-07	330069
3	23141408	rs4558781	G	A	0.6546	-0.0086698	0.0017434	6.60237e-07	330069
3	23141325	rs6778603	T	A	0.65463	-0.0086698	0.0017435	6.60693e-07	330069
1	96891547	rs662450	G	C	0.28168	-0.00863	0.0017356	6.62064e-07	330069
13	58719899	rs9563578	T	C	0.32194	0.0086439	0.0017385	6.62827e-07	330069
1	183527103	rs789182	C	T	0.12811	0.0087639	0.0017629	6.6558e-07	330069
12	112842275	rs11066284	A	T	0.18977	-0.0092463	0.00186	6.65733e-07	330069
9	76865164	rs1598284	C	T	0.66832	0.0087741	0.001765	6.65886e-07	330069
17	44119987	rs10514899	G	C	0.39439	0.0086765	0.0017457	6.6896e-07	330069
1	6851124	rs12048319	T	G	0.15859	-0.0086878	0.001748	6.69114e-07	330069
5	94221397	rs293056	T	G	0.23977	-0.008568	0.001724	6.70348e-07	330069
12	38065570	rs2387019	T	G	0.44193	-0.0086524	0.001741	6.70811e-07	330069
3	171033181	rs17408577	G	C	0.19878	0.0085541	0.0017214	6.72048e-07	330069
1	49783341	rs12036551	G	A	0.57359	0.0087404	0.0017589	6.72822e-07	330069
6	98053608	rs74704950	A	G	0.065407	0.0084743	0.0017056	6.74528e-07	330069
9	76865821	rs6560383	C	T	0.66822	0.0087707	0.0017653	6.75461e-07	330069
6	130632527	rs1983718	A	T	0.31895	-0.0088487	0.0017811	6.76083e-07	330069
9	76846999	rs11143863	G	T	0.67049	0.0087435	0.0017599	6.76239e-07	330069
15	48072200	rs4774505	A	T	0.27225	-0.0086996	0.0017511	6.7655e-07	330069
7	33001540	rs112581006	G	A	0.085485	0.0086278	0.0017367	6.76706e-07	330069
1	183458957	rs3845460	G	A	0.12651	0.0087038	0.0017523	6.79673e-07	330069
13	58282035	rs4297581	A	T	0.42487	-0.0086536	0.0017422	6.80299e-07	330069
5	112260972	rs468735	C	T	0.3594	0.0086369	0.0017389	6.80299e-07	330069
5	112263863	rs151979	C	T	0.43131	0.0087175	0.0017552	6.8124e-07	330069
12	34457254	rs9739724	T	C	0.36169	-0.0086402	0.0017396	6.81554e-07	330069
1	96887370	rs2968487	T	C	0.27782	-0.0086177	0.0017352	6.82496e-07	330069
8	12636582	rs78157579	G	A	0.000629	0.067345	0.013562	6.84699e-07	330069
17	44125466	rs8078067	A	G	0.39447	0.0086679	0.0017456	6.84857e-07	330069
1	96887109	rs550739	A	G	0.2781	-0.008619	0.0017358	6.85962e-07	330069
11	47077246	rs7114683	A	T	0.76719	-0.0086861	0.0017498	6.90558e-07	330069
1	96884287	rs2011693	A	G	0.27791	-0.0086166	0.0017358	6.90876e-07	330069
9	76864627	rs1598286	G	C	0.66959	0.0087368	0.00176	6.90876e-07	330069
8	76851082	rs6472945	C	A	0.43846	-0.0086897	0.0017507	6.92468e-07	330069
1	183456019	rs10911343	A	G	0.12648	0.0086975	0.0017523	6.92628e-07	330069
17	45252313	rs78505871	T	C	0.021119	-0.0090629	0.0018259	6.92787e-07	330069
17	44131096	rs11654745	A	G	0.3946	0.0086633	0.0017455	6.93745e-07	330069
[truncated: 5,923 more rows]
