# Supplementary material for: Study of 300,486 individuals identifies 148 independent genetic loci influencing general cognitive function
Source: Nat Commun. 2018 May 29;9:2098. doi: 10.1038/s41467-018-04362-x (PMC5974083; doi:10.1038/s41467-018-04362-x)
Supplement: Supplementary file 15 — Supplementary Data 12 [file 41467_2018_4362_MOESM15_ESM.xlsx]

## Sheet: Sheet1
Supplementary Data 12. Independent significant SNPs and SNPs tagged within each identified genomic locus for reaction time. Nearest gene was defined based on ANNOVAR annotations showing the most deleterious annotation for each of the tagged SNPs. The functional consequence of genetic variation in each SNP was also defined using ANNOVAR. CADD scores describe how deleterious this genetic variation …
Chromosome	Genomic Locus	Independent significant SNP	Tagged SNP	Allele 1	Allele 2	bp position tagged SNP	MAF tagged SNP	P tagged SNP	Beta tagged SNP	SE tagged SNP	LD between tagged SNP and independent significant SNP (r2)	Nearest Gene	Distance to nearest gene	Functional consequence of tagged SNP on the closest gene	CADD score	RDB score	minChrState	eqtl
1	1	rs11205668	rs3127552	G	C	49437817	0.4612	1.59074e-05	0.0075814	0.0017567	0.655409	AGBL4	0	intronic	2.384	5	9	0
1	1	rs11205668	rs61786029	G	T	49445585	0.4632	1.0404e-05	0.0077709	0.0017626	0.660957	AGBL4	0	intronic	0.114	7	7	0
1	1	rs11205668	rs3122293	G	T	49446508	0.4612	8.89406e-06	0.007805	0.0017569	0.655409	AGBL4	0	intronic	7	6	5	0
1	1	rs11205668	rs3118215	C	A	49450704	0.3946	1.09673e-06	0.0085382	0.001752	0.650593	AGBL4	0	intronic	0.896	7	9	0
1	1	rs11205668	rs1543562	C	T	49454215	0.3946	1.26067e-06	0.0084904	0.0017521	0.650593	AGBL4	0	intronic	4.028	7	7	0
1	1	rs11205668	rs3118216	G	A	49456742	0.3936	9.34114e-07	0.0086124	0.0017558	0.654669	AGBL4	0	intronic	5.362	7	9	0
1	1	rs11205668	rs3118217	G	A	49456793	0.4284	7.34345e-06	0.0079105	0.0017643	0.777864	AGBL4	0	intronic	2.561	6	9	0
1	1	rs11205668	rs1857336	C	T	49457310	0.3936	1.06537e-06	0.0085571	0.0017538	0.654669	AGBL4	0	intronic	0.884	5	9	0
1	1	rs11205668	rs3118219	T	C	49460074	0.3936	1.11558e-06	0.0085425	0.0017541	0.654669	AGBL4	0	intronic	0.419	6	9	0
1	1	rs11205668	rs1341166	A	G	49460953	0.3936	1.18823e-06	0.0085106	0.001752	0.654669	AGBL4	0	intronic	2.734	5	7	0
1	1	rs11205668	rs3118221	G	A	49463181	0.4284	7.24937e-06	0.0079122	0.0017636	0.777864	AGBL4	0	intronic	3.919	5	9	0
1	1	rs11205668	rs3118222	G	A	49463289	0.3936	1.13999e-06	0.008525	0.001752	0.654669	AGBL4	0	intronic	0.72	5	9	0
1	1	rs11205668	rs3121515	T	C	49463436	0.3936	1.12902e-06	0.0085283	0.001752	0.654669	AGBL4	0	intronic	10.05	6	9	0
1	1	rs11205668	rs3118223	A	G	49463801	0.3936	1.07671e-06	0.0085548	0.0017541	0.654669	AGBL4	0	intronic	1.832	6	9	0
1	1	rs11205668	rs3118225	T	C	49464667	0.3907	9.52796e-07	0.0085985	0.0017544	0.658696	AGBL4	0	intronic	9.632	7	9	0
1	1	rs11205668	rs3121273	T	C	49467062	0.4294	8.45474e-06	0.0078571	0.0017643	0.78145	AGBL4	0	intronic	1.992	NA	9	0
1	1	rs11205668	rs3127556	A	G	49468025	0.3936	1.13553e-06	0.0085263	0.001752	0.654669	AGBL4	0	intronic	3.933	7	9	0
1	1	rs11205668	rs3121516	G	A	49468939	0.3936	1.18331e-06	0.0085204	0.0017537	0.654669	AGBL4	0	intronic	1.206	6	9	0
1	1	rs11205668	rs3122296	C	T	49469010	0.3936	1.12202e-06	0.0085391	0.0017538	0.654669	AGBL4	0	intronic	1.994	7	9	0
1	1	rs11205668	rs3121517	C	A	49470493	0.3936	1.18768e-06	0.0085107	0.001752	0.654669	AGBL4	0	intronic	2.852	7	9	0
1	1	rs11205668	rs3121518	G	A	49470766	0.3946	1.19042e-06	0.0085197	0.001754	0.65162	AGBL4	0	intronic	4.023	5	9	0
1	1	rs11205668	rs3121519	G	A	49471182	0.4284	7.96343e-06	0.0078789	0.0017641	0.777864	AGBL4	0	intronic	2.97	6	9	0
1	1	rs11205668	rs3122298	A	C	49471217	0.3936	1.18386e-06	0.0085203	0.0017537	0.654669	AGBL4	0	intronic	4.412	7	9	0
1	1	rs11205668	rs12138462	T	C	49471936	0.3936	NA	NA	NA	0.654669	AGBL4	0	intronic	0.486	6	1	0
1	1	rs11205668	rs9793655	A	G	49472340	0.3936	NA	NA	NA	0.654669	AGBL4	0	intronic	0.573	6	15	0
1	1	rs11205668	rs12039863	G	T	49473413	0.3936	NA	NA	NA	0.654669	AGBL4	0	intronic	0.193	7	15	0
1	1	rs11205668	rs12046834	A	C	49473489	0.3936	NA	NA	NA	0.654669	AGBL4	0	intronic	0.113	7	15	0
1	1	rs11205668	rs373582667	A	G	49473584	0.4254	NA	NA	NA	0.652631	AGBL4	0	intronic	1.345	6	15	0
1	1	rs11205668	rs6624657	C	G	49473830	0.3946	NA	NA	NA	0.650593	AGBL4	0	intronic	0.751	7	15	0
1	1	rs11205668	rs201118810	G	A	49475380	0.3936	NA	NA	NA	0.654669	AGBL4	0	intronic	1.24	7	15	0
1	1	rs11205668	rs28824927	C	T	49476895	0.4284	NA	NA	NA	0.777864	AGBL4	0	intronic	3.47	6	15	0
1	1	rs11205668	rs3118226	T	C	49478333	0.3936	9.77687e-07	0.0085975	0.001756	0.654669	AGBL4	0	intronic	11.83	5	9	0
1	1	rs11205668	rs3122299	T	C	49478512	0.3936	1.14235e-06	0.0085248	0.0017521	0.654669	AGBL4	0	intronic	1.352	6	9	0
1	1	rs11205668	rs10788905	C	G	49479306	0.3936	1.14657e-06	0.0085348	0.0017544	0.654669	AGBL4	0	intronic	2.459	4	9	0
1	1	rs11205668	rs4926781	T	A	49479645	0.3936	1.1463e-06	0.0085245	0.0017523	0.654669	AGBL4	0	intronic	4.083	7	9	0
1	1	rs11205668	rs11205589	A	G	49481545	0.4284	7.09741e-06	0.0079264	0.001765	0.777864	AGBL4	0	intronic	3.211	7	9	0
1	1	rs11205668	rs6669433	C	A	49482703	0.3936	1.17842e-06	0.0085151	0.0017523	0.654669	AGBL4	0	intronic	2.592	7	9	0
1	1	rs11205668	rs7524637	G	A	49483208	0.3936	1.37057e-06	0.0084709	0.0017541	0.654669	AGBL4	0	intronic	6.446	7	9	0
1	1	rs11205668	rs1018627	C	T	49484622	0.4274	7.73215e-06	0.0078904	0.0017642	0.774291	AGBL4	0	intronic	2.725	6	9	0
1	1	rs11205668	rs10888642	G	C	49489068	0.3936	1.02117e-06	0.0085623	0.0017518	0.654669	AGBL4	0	intronic	3.993	6	9	0
1	1	rs11205668	rs1079130	T	C	49490428	0.3936	9.13903e-07	0.0086086	0.0017535	0.654669	AGBL4	0	intronic	2.933	NA	9	0
1	1	rs11205668	rs4926783	A	G	49492951	0.3926	9.98849e-07	0.008579	0.0017537	0.65146	AGBL4	0	intronic	2.071	7	9	0
1	1	rs11205668	rs6588205	G	A	49494285	0.4284	6.22587e-06	0.0079713	0.0017641	0.777864	AGBL4	0	intronic	4.786	5	9	0
1	1	rs11205668	rs7554550	T	A	49497295	0.4284	6.83125e-06	0.0079369	0.0017642	0.777864	AGBL4	0	intronic	0.183	6	9	0
1	1	rs11205668	rs4926784	C	T	49502302	0.4284	5.91289e-06	0.0079939	0.0017648	0.777864	AGBL4	0	intronic	1.015	7	9	0
1	1	rs11205668	rs12410172	G	C	49515788	0.4235	7.40287e-06	0.0079106	0.001765	0.824216	ENSG00000229846	0	ncRNA_intronic	3.876	3a	5	0
1	1	rs11205668	rs10888646	T	C	49518126	0.3877	1.44178e-06	0.0084441	0.0017522	0.697778	ENSG00000229846	0	ncRNA_intronic	4.792	4	9	0
1	1	rs11205668	rs4132756	G	T	49518537	0.4235	7.07946e-06	0.0079246	0.0017644	0.824216	ENSG00000229846	0	ncRNA_intronic	5.81	NA	9	0
1	1	rs11205668	rs11581331	A	G	49519300	0.4235	6.86436e-06	0.0079391	0.0017651	0.824216	ENSG00000229846	0	ncRNA_intronic	11.01	7	9	0
1	1	rs11205668	rs2374913	A	G	49520139	0.3877	1.13999e-06	0.0085432	0.0017557	0.697778	ENSG00000229846	0	ncRNA_intronic	4.177	NA	9	0
1	1	rs11205668	rs11205595	G	A	49524755	0.3877	1.31674e-06	0.0084747	0.001752	0.697778	ENSG00000229846	0	ncRNA_intronic	17.39	7	9	0
1	1	rs11205668	rs7536787	T	C	49525465	0.3877	1.23225e-06	0.0085148	0.0017555	0.697778	ENSG00000229846	0	ncRNA_intronic	0.608	7	9	0
1	1	rs11205668	rs12408811	G	A	49529572	0.4235	6.88335e-06	0.0079348	0.0017643	0.824216	ENSG00000229846	0	ncRNA_intronic	0.53	7	9	0
1	1	rs11205668	rs3905053	G	A	49532700	0.3807	1.44477e-06	0.0084234	0.001748	0.678816	ENSG00000229846	0	ncRNA_intronic	5.779	6	9	0
1	1	rs11205668	rs632493	T	G	49545134	0.3807	1.36364e-06	0.0084441	0.0017481	0.678816	ENSG00000229846	0	ncRNA_intronic	1.164	NA	9	0
1	1	rs11205668	rs615473	C	T	49546647	0.3807	1.34431e-06	0.008449	0.0017481	0.678816	ENSG00000229846	0	ncRNA_intronic	17.34	6	9	0
1	1	rs11205668	rs3862265	T	C	49550529	0.4245	7.54745e-06	0.0079032	0.001765	0.820925	ENSG00000229846	0	ncRNA_intronic	3.447	6	9	0
1	1	rs11205668	rs6700885	T	A	49560537	0.3489	0.000303809	0.0063976	0.0017712	0.607831	ENSG00000229846	0	ncRNA_intronic	2.79	7	5	0
1	1	rs11205668	rs12724511	T	A	49564891	0.4245	7.48342e-06	0.0079068	0.0017651	0.820925	ENSG00000229846	0	ncRNA_intronic	2.797	5	5	0
1	1	rs11205668	rs725191	A	G	49574575	0.4225	8.82267e-06	0.0078443	0.001765	0.821327	ENSG00000229846	0	ncRNA_intronic	0.556	7	9	0
1	1	rs11205668	rs662440	T	A	49576500	0.3479	0.000318053	0.0063772	0.0017714	0.612325	ENSG00000229846	0	ncRNA_intronic	4.14	6	9	0
1	1	rs11205668	rs12040085	G	A	49586379	0.4294	2.6333e-06	0.008321	0.0017713	0.850104	ENSG00000229846	0	ncRNA_intronic	2.603	6	9	0
1	1	rs11205668	rs545621	T	C	49589806	0.4284	2.22177e-06	0.0083492	0.0017643	0.840729	ENSG00000229846	0	ncRNA_intronic	1.476	7	9	0
1	1	rs11205668	rs6670645	C	G	49593027	0.4294	2.38506e-06	0.0083578	0.0017715	0.850104	ENSG00000229846	0	ncRNA_intronic	0.016	7	9	0
1	1	rs11205668	rs574329	T	C	49598418	0.3509	0.000161585	0.0066842	0.0017718	0.618479	ENSG00000229846	0	ncRNA_intronic	2.102	7	9	0
1	1	rs11205668	rs617996	C	A	49604940	0.4284	2.56803e-06	0.0082977	0.0017644	0.840729	ENSG00000229846	0	ncRNA_intronic	2.168	7	9	0
1	1	rs11205668	rs12403773	A	C	49606446	0.4284	2.34693e-06	0.0083392	0.0017664	0.840729	ENSG00000229846	0	ncRNA_intronic	13.18	6	9	0
1	1	rs11205668	rs549430	C	T	49620445	0.4274	2.87475e-06	0.0082574	0.0017645	0.844041	ENSG00000229846	0	ncRNA_intronic	17.16	6	9	0
1	1	rs11205668	rs1924645	T	C	49621403	0.4284	2.76376e-06	0.0082755	0.0017654	0.840729	ENSG00000229846	0	ncRNA_intronic	7.824	NA	9	0
1	1	rs11205668	rs7546954	A	G	49629562	0.3837	1.37594e-06	0.0084809	0.0017564	0.689896	ENSG00000229846	0	ncRNA_intronic	1.385	7	5	0
1	1	rs11205668	rs354168	G	T	49642698	0.3757	1.07597e-06	0.0085554	0.0017541	0.696681	ENSG00000229846	0	ncRNA_intronic	0.492	7	9	0
1	1	rs11205668	rs1494463	A	G	49658500	0.4235	1.5153e-06	0.0084971	0.0017668	0.873123	AGBL4	0	intronic	10.07	7	9	0
1	1	rs11205668	rs7551542	T	C	49659019	0.4225	1.53038e-06	0.0084936	0.0017668	0.870106	AGBL4	0	intronic	1.64	7	9	0
1	1	rs11205668	rs11583105	A	T	49659876	0.4254	1.43913e-06	0.00854	0.0017719	0.879246	AGBL4	0	intronic	5.104	6	9	0
1	1	rs11205668	rs6588306	G	A	49661877	0.3748	1.1695e-06	0.00853	0.0017548	0.706574	AGBL4	0	intronic	3.442	7	9	0
1	1	rs11205668	rs11591141	T	C	49664304	0.3748	1.20226e-06	0.0085203	0.0017548	0.706574	AGBL4	0	intronic	1.337	6	9	0
1	1	rs11205668	rs12036714	A	G	49665640	0.4235	1.63795e-06	0.0084696	0.0017668	0.873123	AGBL4	0	intronic	10.51	7	7	0
1	1	rs11205668	rs11205608	C	A	49666895	0.4254	1.24767e-06	0.00859	0.0017719	0.879246	AGBL4	0	intronic	1.096	7	7	0
1	1	rs11205668	rs11205609	A	C	49676792	0.4235	1.84544e-06	0.008427	0.0017667	0.873123	AGBL4	0	intronic	4.511	5	7	0
1	1	rs11205668	rs34202292	G	A	49687383	0.4254	1.68772e-06	0.0084831	0.0017719	0.879246	AGBL4	0	intronic	2.922	7	9	0
1	1	rs11205668	rs12049328	C	T	49690623	0.4235	1.70333e-06	0.0084476	0.0017651	0.873123	AGBL4	0	intronic	1.047	6	9	0
1	1	rs11205668	rs11205613	T	C	49707234	0.3748	1.41286e-06	0.0084657	0.0017552	0.707459	AGBL4	0	intronic	0.936	6	9	0
1	1	rs11205668	rs7528510	T	C	49711281	0.4235	1.69473e-06	0.0084497	0.0017652	0.873123	AGBL4	0	intronic	2.695	7	9	0
1	1	rs11205668	rs12124042	T	G	49711976	0.3738	1.3128e-06	0.0084911	0.0017551	0.704479	AGBL4	0	intronic	0.486	6	9	0
1	1	rs11205668	rs6702810	C	T	49721079	0.3738	1.21843e-06	0.0085159	0.0017549	0.704479	AGBL4	0	intronic	9.163	6	9	0
1	1	rs11205668	rs35067082	C	A	49725802	0.4503	NA	NA	NA	0.793533	RP11-141A19.2	0	ncRNA_intronic	1.006	NA	15	0
1	1	rs11205668	rs112611666	T	G	49728262	0.4274	NA	NA	NA	0.857382	RP11-141A19.2	0	ncRNA_intronic	4.94	6	9	0
1	1	rs11205668	rs112952714	A	T	49728326	0.3767	NA	NA	NA	0.697866	RP11-141A19.2	0	ncRNA_intronic	1.109	6	9	0
1	1	rs11205668	rs17785166	C	T	49731368	0.4235	1.92841e-06	0.008406	0.0017656	0.873123	RP11-141A19.2	0	ncRNA_intronic	5.134	6	7	0
1	1	rs11205668	rs12044115	G	A	49731707	0.4235	2.05447e-06	0.0083915	0.0017673	0.873123	RP11-141A19.2	0	ncRNA_intronic	10.78	5	7	0
1	1	rs11205668	rs727021	A	T	49733836	0.4245	1.60214e-06	0.0084755	0.0017664	0.869166	RP11-141A19.2	0	ncRNA_exonic	7.766	7	9	0
1	1	rs11205668	rs7546830	G	A	49743831	0.3897	9.17487e-08	0.0094053	0.0017605	0.783151	AGBL4	0	intronic	12.24	7	9	0
1	1	rs11205668	rs1809791	C	T	49748303	0.4254	8.45863e-07	0.008694	0.0017654	0.908323	AGBL4	0	intronic	3.284	7	9	0
1	1	rs11205668	rs4027807	C	T	49750225	0.3767	NA	NA	NA	0.744486	AGBL4	0	intronic	1.569	6	15	0
1	1	rs11205668	rs7413892	A	C	49751467	0.3907	8.37915e-08	0.0094343	0.0017605	0.786244	AGBL4	0	intronic	1.079	7	15	0
1	1	rs11205668	rs200132798	A	G	49752231	0.4274	NA	NA	NA	0.900427	AGBL4	0	intronic	0.989	7	15	0
1	1	rs11205668	rs7514767	A	G	49755114	0.4264	6.5283e-07	0.0087875	0.0017663	0.904368	AGBL4	0	intronic	1.402	6	9	0
1	1	rs11205668	rs733702	C	T	49757171	0.3767	8.01863e-07	0.0086864	0.0017602	0.744486	AGBL4	0	intronic	8.903	7	9	0
1	1	rs11205668	rs1431638	T	C	49762418	0.3767	5.1606e-07	0.0088379	0.0017604	0.744486	AGBL4	0	intronic	19.75	6	5	0
1	1	rs11205668	rs3052046	T	A	49768280	0.4304	NA	NA	NA	0.838275	AGBL4	0	intronic	1.617	6	9	0
1	1	rs11205668	rs6702977	T	C	49771108	0.3917	6.95665e-08	0.009493	0.0017604	0.788759	AGBL4	0	intronic	0.259	7	9	0
1	1	rs11205668	rs12037079	T	C	49771826	0.4294	7.26775e-07	0.0087507	0.0017663	0.89386	AGBL4	0	intronic	6.023	7	9	0
1	1	rs11205668	rs12030700	G	A	49772014	0.3907	1.05633e-07	0.0093402	0.0017567	0.786244	AGBL4	0	intronic	7.693	6	9	0
1	1	rs11205668	rs12036551	G	A	49783341	0.4294	6.72822e-07	0.0087404	0.0017589	0.89386	AGBL4	0	intronic	6.07	7	9	0
1	1	rs11205668	rs6698947	G	T	49784750	0.3907	1.09345e-07	0.0093483	0.0017603	0.786244	AGBL4	0	intronic	2.199	6	9	0
1	1	rs11205668	rs7522609	C	G	49792287	0.3917	8.47813e-08	0.0094285	0.0017601	0.788759	AGBL4	0	intronic	0.111	7	9	0
1	1	rs11205668	rs1845464	G	A	49796025	0.3907	1.08468e-07	0.0093483	0.0017598	0.786244	AGBL4	0	intronic	1.758	6	9	0
1	1	rs11205668	rs1494462	G	A	49796157	0.4245	2.47229e-07	0.0091122	0.001766	0.911941	AGBL4	0	intronic	19.69	6	9	0
1	1	rs11205668	rs17534292	G	A	49797804	0.3907	1.07349e-07	0.0093532	0.0017601	0.786244	AGBL4	0	intronic	4.012	6	5	0
1	1	rs11205668	rs12408156	C	A	49798902	0.4245	3.26137e-07	0.0090208	0.0017661	0.911941	AGBL4	0	intronic	3.65	5	5	0
1	1	rs11205668	rs12407305	C	T	49799193	0.3907	1.17571e-07	0.0093241	0.0017601	0.786244	AGBL4	0	intronic	3.78	6	5	0
1	1	rs11205668	rs12036970	A	G	49801349	0.4066	1.66725e-07	0.009205	0.001759	0.762019	AGBL4	0	intronic	1.006	7	5	0
1	1	rs11205668	rs35185599	G	C	49816443	0.4235	4.66659e-07	0.0088993	0.0017659	0.923085	AGBL4	0	intronic	0.95	6	9	0
1	1	rs11205668	rs12725943	C	T	49816560	0.4235	5.10152e-07	0.0088982	0.0017716	0.923085	AGBL4	0	intronic	1.59	7	9	0
1	1	rs11205668	rs12043096	T	G	49818224	0.4225	4.72389e-07	0.008895	0.0017658	0.919938	AGBL4	0	intronic	0.765	6	5	0
1	1	rs11205668	rs1890288	T	C	49829596	0.3966	4.10677e-07	0.0089043	0.0017583	0.776701	AGBL4	0	intronic	0.535	5	9	0
1	1	rs11205668	rs1338216	C	T	49847861	0.3877	2.21513e-07	0.0091194	0.0017604	0.792465	AGBL4-IT1	0	ncRNA_intronic	0.246	7	9	0
1	1	rs11205668	rs12040168	A	C	49850066	0.4235	4.39238e-07	0.008924	0.0017667	0.916278	AGBL4-IT1	0	ncRNA_intronic	3.499	6	9	0
1	1	rs11205668	rs72684884	G	A	49861334	0.3748	8.57235e-07	0.0086648	0.0017604	0.75336	AGBL4-IT1	0	ncRNA_intronic	2.422	7	9	0
1	1	rs11205668	rs76145035	T	C	49861432	0.4225	NA	NA	NA	0.919938	AGBL4-IT1	0	ncRNA_intronic	0.497	6	9	0
1	1	rs11205668	rs1852592	A	G	49893541	0.3777	1.25748e-06	0.0085317	0.0017604	0.746711	AGBL4-IT1	0	ncRNA_intronic	0.891	3b	9	0
1	1	rs11205668	rs1527830	T	A	49897328	0.3887	1.41873e-07	0.0092666	0.0017607	0.794946	AGBL4-IT1	0	ncRNA_intronic	0.404	6	9	0
1	1	rs11205668	rs11205625	A	G	49899702	0.4443	3.408e-07	0.0089832	0.0017616	0.97384	AGBL4-IT1	0	ncRNA_intronic	0.298	7	9	0
1	1	rs11205668	rs12037603	T	C	49902421	0.4414	9.23634e-08	0.0094158	0.0017628	0.98517	AGBL4-IT1	0	ncRNA_intronic	1.004	7	9	0
1	1	rs11205668	rs12731884	C	A	49907711	0.4245	NA	NA	NA	0.919415	AGBL4-IT1	0	ncRNA_intronic	4.446	7	9	0
1	1	rs11205668	rs12731737	A	G	49907712	0.4254	NA	NA	NA	0.915439	AGBL4-IT1	0	ncRNA_intronic	3.264	7	9	0
1	1	rs11205668	rs12731743	G	A	49907720	0.4245	5.05359e-07	0.0089059	0.0017725	0.919415	AGBL4-IT1	0	ncRNA_intronic	4.984	7	9	0
1	1	rs11205668	rs950562	A	C	49918926	0.3668	2.1928e-07	0.0091288	0.0017615	0.729839	AGBL4-IT1	0	ncRNA_intronic	3.44	7	9	0
1	1	rs11205668	rs6588349	G	C	49923197	0.3668	3.06267e-07	0.0090188	0.0017616	0.729839	AGBL4-IT1	0	ncRNA_intronic	4.405	6	9	0
1	1	rs11205668	rs6588350	C	T	49923504	0.3807	5.46512e-08	0.0095749	0.0017615	0.769038	AGBL4-IT1	0	ncRNA_intronic	3.516	7	9	0
1	1	rs11205668	rs7528404	A	G	49924951	0.3668	2.77715e-07	0.009051	0.0017616	0.729839	AGBL4-IT1	0	ncRNA_intronic	0.356	7	9	0
1	1	rs11205668	rs1415985	C	T	49930749	0.4324	4.97622e-08	0.0096155	0.0017636	0.95374	AGBL4-IT1	0	ncRNA_intronic	5.152	4	7	0
1	1	rs11205668	rs1933271	T	C	49949006	0.3658	3.22775e-07	0.0090014	0.0017616	0.726959	AGBL4	0	intronic	4.151	NA	9	0
1	1	rs11205668	rs7543649	G	T	49953110	0.4334	6.05899e-08	0.0095537	0.0017636	0.957334	AGBL4	0	intronic	14.01	6	9	0
1	1	rs11205668	rs2356615	C	T	49953367	0.4334	5.85329e-08	0.0095646	0.0017636	0.957334	AGBL4	0	intronic	0.514	NA	9	0
1	1	rs11205668	rs12402477	G	A	49956912	0.4334	6.08555e-08	0.0095525	0.0017636	0.957334	AGBL4	0	intronic	0.973	7	9	0
1	1	rs11205668	rs4926814	G	A	49957136	0.4334	5.31863e-08	0.0096234	0.0017689	0.957098	AGBL4	0	intronic	5.884	6	9	0
1	1	rs11205668	rs61783601	C	G	49966142	0.4334	6.13056e-08	0.0095503	0.0017637	0.957334	AGBL4	0	intronic	7.972	7	9	0
1	1	rs11205668	rs11583504	G	C	49969978	0.4334	6.47292e-08	0.0095331	0.0017636	0.957334	AGBL4	0	intronic	7.843	7	9	0
1	1	rs11205668	rs36141602	T	C	49977069	0.4334	NA	NA	NA	0.957334	AGBL4	0	intronic	0.642	6	9	0
1	1	rs11205668	rs1167293	A	T	49977295	0.3161	1.46791e-06	0.0084201	0.0017485	0.606894	AGBL4	0	intronic	1.613	6	9	0
1	1	rs11205668	rs1933270	G	T	49977965	0.3648	4.26481e-07	0.008909	0.0017618	0.724945	AGBL4	0	intronic	7.818	NA	9	0
1	1	rs11205668	rs1405915	T	C	49985361	0.3807	5.98136e-08	0.0095463	0.0017615	0.769038	AGBL4	0	intronic	2.393	6	9	0
1	1	rs11205668	rs10788914	T	C	49998239	0.3668	4.28351e-07	0.0089079	0.0017618	0.724232	AGBL4	0	intronic	1.951	7	9	0
1	1	rs11205668	rs12741589	G	A	50004051	0.4423	1.57725e-07	0.0092718	0.0017683	0.988869	AGBL4	0	intronic	0.326	7	5	0
1	1	rs11205668	rs12735833	T	C	50008768	0.4423	8.53886e-08	0.009442	0.0017631	0.988869	AGBL4	0	intronic	4.471	6	9	0
1	1	rs11205668	rs2103266	A	G	50022373	0.3767	1.66495e-06	0.0084363	0.0017611	0.75188	AGBL4	0	intronic	3.454	5	9	0
1	1	rs11205668	rs2178085	T	C	50023956	0.4463	1.56315e-07	0.0092478	0.0017631	0.974024	AGBL4	0	intronic	6.498	7	9	0
1	1	rs11205668	rs4926818	T	C	50030666	0.3757	NA	NA	NA	0.748914	AGBL4	0	intronic	8.98	7	9	0
1	1	rs11205668	rs4926819	G	C	50030672	0.3757	NA	NA	NA	0.748914	AGBL4	0	intronic	7.22	6	9	0
1	1	rs11205668	rs4926820	T	A	50030673	0.3757	NA	NA	NA	0.748914	AGBL4	0	intronic	11.69	6	9	0
1	1	rs11205668	rs10157679	G	C	50034036	0.4354	2.0488e-07	0.009117	0.001755	0.963601	AGBL4	0	intronic	4.297	7	9	0
1	1	rs11205668	rs1856297	C	T	50038262	0.4404	1.52055e-07	0.0092569	0.0017632	0.98154	AGBL4	0	intronic	10.6	7	9	0
1	1	rs11205668	rs34469945	G	A	50049874	0.4354	1.7346e-07	0.0091745	0.0017556	0.963601	AGBL4	0	intronic	2.4	6	9	0
1	1	rs11205668	rs4926825	C	T	50058576	0.4423	1.23339e-07	0.009352	0.0017683	0.988869	AGBL4	0	intronic	0.444	6	9	0
1	1	rs11205668	rs35524072	G	A	50068312	0.4414	1.50314e-07	0.0092605	0.0017631	0.985227	AGBL4	0	intronic	1.554	6	9	0
1	1	rs11205668	rs12402329	T	C	50079503	0.3897	2.31153e-07	0.0091088	0.001761	0.79745	AGBL4	0	intronic	0.6	7	9	0
1	1	rs11205668	rs12744549	C	G	50080280	0.4423	1.3406e-07	0.0093024	0.001764	0.988869	AGBL4	0	intronic	4.881	7	9	0
1	1	rs11205668	rs1343159	C	T	50091006	0.3757	1.01111e-06	0.0086115	0.0017612	0.755576	AGBL4	0	intronic	12.97	7	9	0
1	1	rs11205668	rs12030579	G	A	50108474	0.4414	9.28966e-08	0.0094157	0.0017632	0.985227	AGBL4	0	intronic	0.435	6	9	0
1	1	rs11205668	rs1578800	G	A	50110070	0.4423	9.1939e-08	0.0094464	0.0017683	0.988869	AGBL4	0	intronic	0.407	7	9	0
1	1	rs11205668	rs1343162	T	C	50115480	0.4423	1.02447e-07	0.0093841	0.0017631	0.988869	AGBL4	0	intronic	0.794	7	9	0
1	1	rs11205668	rs4408195	A	G	50128198	0.3757	9.75663e-07	0.0086233	0.0017611	0.755576	AGBL4	0	intronic	8.446	6	9	0
1	1	rs11205668	rs6693344	C	G	50141412	0.4414	1.71554e-07	0.0092174	0.0017631	0.985227	AGBL4	0	intronic	0.114	5	9	0
1	1	rs11205668	rs7521155	A	G	50148204	0.3887	1.10969e-06	0.0085737	0.0017601	0.794946	AGBL4	0	intronic	2.463	6	9	0
1	1	rs11205668	rs10888666	T	C	50159950	0.3897	2.99709e-07	0.009023	0.001761	0.79745	AGBL4	0	intronic	19.95	5	9	0
1	1	rs11205668	rs12735229	G	A	50161291	0.4423	1.47503e-07	0.0092928	0.0017681	0.988869	AGBL4	0	intronic	3.226	6	9	0
1	1	rs11205668	rs1343165	G	A	50164531	0.4414	1.50557e-07	0.0092602	0.0017632	0.985227	AGBL4	0	intronic	2.805	6	9	0
1	1	rs11205668	rs7527797	A	G	50170873	0.4423	1.51321e-07	0.0092853	0.0017683	0.988869	AGBL4	0	intronic	2.625	6	9	0
1	1	rs11205668	rs11205641	G	A	50185075	0.4404	1.06955e-07	0.0093705	0.0017632	0.98154	AGBL4	0	intronic	2.238	5	9	0
1	1	rs11205668	rs7549810	T	C	50190225	0.3757	1.02518e-06	0.0086063	0.0017611	0.755576	AGBL4	0	intronic	2.459	6	9	0
1	1	rs11205668	rs11205642	A	T	50191057	0.3757	8.11708e-07	0.0086867	0.0017611	0.755576	AGBL4	0	intronic	5.782	7	9	0
1	1	rs11205668	rs11205644	T	C	50204667	0.3748	1.18386e-06	0.0085568	0.0017612	0.75336	AGBL4	0	intronic	2.552	7	9	0
1	1	rs11205668	rs7546466	C	G	50206635	0.3748	1.53674e-06	0.0084653	0.0017612	0.75336	AGBL4	0	intronic	1.057	6	9	0
1	1	rs11205668	rs72686739	A	C	50215148	0.4423	1.07547e-07	0.0093688	0.0017632	0.988869	AGBL4	0	intronic	0.043	6	9	0
1	1	rs11205668	rs4097079	A	T	50219948	0.3897	2.1727e-07	0.0091275	0.0017607	0.790587	AGBL4	0	intronic	4.218	6	9	0
1	1	rs11205668	rs12735035	C	A	50221366	0.4423	1.19895e-07	0.0093336	0.0017631	0.981525	AGBL4	0	intronic	0.859	7	9	0
1	1	rs11205668	rs3903686	C	T	50223721	0.3887	2.26152e-07	0.0091162	0.0017611	0.794946	AGBL4	0	intronic	1.645	6	9	0
1	1	rs11205668	rs10788917	T	C	50227177	0.3757	1.08568e-06	0.0085856	0.001761	0.755576	AGBL4	0	intronic	2.391	7	9	0
1	1	rs11205668	rs11488179	G	C	50237300	0.3897	1.61659e-07	0.0092255	0.001761	0.79745	AGBL4	0	intronic	7.578	5	9	0
1	1	rs11205668	rs11584742	T	C	50243541	0.4423	1.18577e-07	0.0093636	0.0017681	0.988869	AGBL4	0	intronic	2.906	7	9	0
1	1	rs11205668	rs3899856	G	T	50243854	0.3887	1.35457e-07	0.0092807	0.0017606	0.794946	AGBL4	0	intronic	1.95	7	8	0
1	1	rs11205668	rs6695041	G	A	50245509	0.3887	1.38357e-07	0.0092738	0.0017606	0.794946	AGBL4	0	intronic	5.996	7	9	0
1	1	rs11205668	rs10888669	C	T	50250273	0.3897	1.96789e-07	0.0091608	0.0017609	0.79745	AGBL4	0	intronic	1.165	7	9	0
1	1	rs11205668	rs7536940	T	A	50251567	0.3857	NA	NA	NA	0.699911	AGBL4	0	intronic	3.998	6	9	0
1	1	rs11205668	rs6588360	A	G	50254614	0.4414	7.5753e-08	0.0094791	0.0017629	0.985227	AGBL4	0	intronic	0.599	6	9	0
1	1	rs11205668	rs28393899	C	G	50260247	0.4423	1.75469e-07	0.0092394	0.0017687	0.988869	AGBL4	0	intronic	0.224	6	9	0
1	1	rs11205668	rs6695948	C	T	50260630	0.4414	1.43417e-07	0.0092773	0.0017634	0.985227	AGBL4	0	intronic	3.39	7	9	0
1	1	rs11205668	rs4272667	T	C	50269776	0.4423	9.72747e-08	0.0094283	0.0017683	0.988869	AGBL4	0	intronic	13.71	6	5	0
1	1	rs11205668	rs6659281	T	C	50274233	0.3757	1.16172e-06	0.008561	0.0017607	0.755576	AGBL4	0	intronic	1.75	6	9	0
1	1	rs11205668	rs17379721	C	T	50277009	0.4423	1.0392e-07	0.009408	0.0017685	0.988869	AGBL4	0	intronic	2.394	6	9	0
1	1	rs11205668	rs12724893	A	G	50277236	0.4423	8.22621e-08	0.0094528	0.0017629	0.988869	AGBL4	0	intronic	1.204	7	9	0
1	1	rs11205668	rs4926831	T	C	50290101	0.4423	7.49376e-08	0.0094827	0.0017629	0.988869	AGBL4	0	intronic	0.517	5	7	0
1	1	rs11205668	rs6680547	T	C	50290289	0.4423	7.49549e-08	0.0094825	0.0017629	0.988869	AGBL4	0	intronic	1.941	5	7	0
1	1	rs11205668	rs4244636	G	T	50290612	0.3757	7.79112e-07	0.0086998	0.0017609	0.755576	AGBL4	0	intronic	4.804	5	7	0
1	1	rs11205668	rs11581677	T	C	50292926	0.4423	1.15585e-07	0.0093743	0.0017686	0.988869	AGBL4	0	intronic	2.184	6	9	0
1	1	rs11205668	rs34280445	A	G	50298118	0.4473	NA	NA	NA	0.970135	AGBL4	0	intronic	1.388	6	9	0
1	1	rs11205668	rs4363466	G	A	50306257	0.4423	1.05828e-07	0.0094014	0.0017683	0.988869	AGBL4	0	intronic	2.899	7	9	0
1	1	rs11205668	rs4926833	A	G	50311454	0.3439	1.44012e-05	0.0075667	0.0017444	0.678161	ZNF859P	0	ncRNA_exonic	10.74	5	8	0
1	1	rs11205668	rs12031362	C	T	50318398	0.4423	9.24485e-08	0.0094437	0.0017681	0.988869	AGBL4	0	intronic	9.843	6	9	0
1	1	rs11205668	rs6703701	T	A	50323833	0.4423	8.9002e-08	0.0094282	0.0017629	0.988869	AGBL4	0	intronic	7.291	6	9	0
1	1	rs11205668	rs6663001	T	C	50329611	0.4423	7.68776e-08	0.0095028	0.0017681	0.988869	AGBL4	0	intronic	9.516	6	9	0
1	1	rs11205668	rs12039972	C	A	50339186	0.3757	8.17523e-07	0.0086832	0.0017609	0.755576	AGBL4	0	intronic	1.077	7	9	0
1	1	rs11205668	rs113091665	G	A	50340935	0.4423	NA	NA	NA	0.988869	AGBL4	0	intronic	2.191	7	15	0
1	1	rs11205668	rs139583059	G	T	50343226	0.3897	NA	NA	NA	0.79745	AGBL4	0	intronic	1.183	7	15	0
1	1	rs11205668	rs6588366	C	G	50352291	0.4354	9.85598e-08	0.0093511	0.0017546	0.963601	AGBL4	0	intronic	0.343	6	5	0
1	1	rs11205668	rs6588367	C	G	50356058	0.4423	9.482e-08	0.0094078	0.0017629	0.988869	AGBL4	0	intronic	0.378	7	5	0
1	1	rs11205668	rs10888672	A	G	50359987	0.3897	1.57072e-07	0.0092331	0.0017606	0.79745	AGBL4	0	intronic	1.462	6	5	0
1	1	rs11205668	rs12022125	G	A	50360066	0.4423	8.73977e-08	0.0094339	0.0017629	0.988869	AGBL4	0	intronic	3.123	7	9	0
1	1	rs11205668	rs34056301	A	C	50362147	0.4423	NA	NA	NA	0.988869	AGBL4	0	intronic	12.31	6	9	0
1	1	rs11205668	rs12403905	G	A	50372032	0.3897	1.68306e-07	0.0092106	0.0017606	0.79745	AGBL4	0	intronic	3.371	6	9	0
1	1	rs11205668	rs11485576	A	T	50382997	0.3897	1.47265e-07	0.0092541	0.0017607	0.79745	AGBL4	0	intronic	4.851	7	9	0
1	1	rs11205668	rs6588369	C	A	50387404	0.3757	8.2699e-07	0.0086791	0.0017608	0.755576	AGBL4	0	intronic	5.717	6	9	0
1	1	rs11205668	rs7551665	T	C	50401621	0.3757	8.46837e-07	0.0086709	0.0017608	0.755576	AGBL4	0	intronic	3.715	7	9	0
1	1	rs11205668	rs6679333	T	C	50405348	0.3897	NA	NA	NA	0.79745	AGBL4	0	intronic	2.9	7	9	0
1	1	rs11205668	rs12083706	A	G	50411154	0.3757	8.93305e-07	0.0086524	0.0017608	0.755576	AGBL4	0	intronic	4.172	7	9	0
1	1	rs11205668	rs570599197	T	G	50414244	0.4483	NA	NA	NA	0.966512	AGBL4	0	intronic	2.941	NA	9	0
1	1	rs11205668	rs537962582	T	G	50414246	0.4463	NA	NA	NA	0.966435	AGBL4	0	intronic	2.941	NA	9	0
1	1	rs11205668	rs11205668	T	C	50416830	0.4453	2.67855e-08	0.0097948	0.0017612	1	AGBL4	0	intronic	6.526	7	9	0
1	1	rs11205668	rs12047155	G	A	50416930	0.4443	2.89734e-08	0.0097708	0.0017613	0.996262	AGBL4	0	intronic	12.45	7	9	0
1	1	rs11205668	rs12725998	G	A	50420315	0.4453	2.88868e-08	0.0097717	0.0017613	1	AGBL4	0	intronic	2.892	7	9	0
1	1	rs11205668	rs9659092	G	A	50443589	0.4453	2.7441e-08	0.0098145	0.0017661	1	AGBL4	0	intronic	3.285	7	9	0
1	1	rs11205668	rs4313442	A	T	50458269	0.4453	2.7227e-08	0.0097898	0.0017612	1	AGBL4	0	intronic	8.346	6	9	0
1	1	rs11205668	rs12039592	T	G	50469729	0.4453	2.77971e-08	0.0097835	0.0017612	1	AGBL4	0	intronic	13.59	7	9	0
1	1	rs11205668	rs11205672	A	G	50470847	0.4453	2.71331e-08	0.0097911	0.0017613	1	AGBL4	0	intronic	12.94	7	9	0
1	1	rs11205668	rs12758298	A	C	50484613	0.4453	2.75043e-08	0.0097868	0.0017612	1	AGBL4	0	intronic	10.84	6	9	0
1	1	rs11205668	rs11205674	A	G	50487621	0.3787	2.62482e-07	0.0090574	0.0017592	0.763048	AGBL4	0	intronic	7.026	5	5	0
1	1	rs11205668	rs9660278	T	C	50500185	0.4453	3.07893e-08	0.0097538	0.0017616	1	AGBL4	10600	intergenic	12.37	6	9	0
1	1	rs11205668	rs10888677	C	T	50505653	0.3787	2.80479e-07	0.0090366	0.0017594	0.763048	ELAVL4	8033	intergenic	1.567	6	9	0
1	1	rs11205668	rs12140239	G	C	50509362	0.3787	3.15428e-07	0.0089973	0.0017593	0.763048	ELAVL4	4324	intergenic	8.128	5	9	0
1	1	rs11205668	rs4454586	G	A	50514372	0.4453	2.8655e-08	0.0097757	0.0017615	1	ELAVL4	0	intronic	12.91	4	1	0
1	1	rs11205668	rs4537610	T	C	50514389	0.3936	5.66892e-08	0.0095508	0.0017592	0.808752	ELAVL4	0	intronic	14.13	2b	1	0
1	1	rs11205668	rs6700902	A	G	50540041	0.3738	1.47469e-06	0.0085173	0.001769	0.760627	ELAVL4	0	intronic	1.397	7	9	0
1	1	rs11205668	rs12028252	G	C	50542922	0.3738	1.40508e-06	0.0085401	0.0017702	0.760627	ELAVL4	0	intronic	3.17	7	9	0
1	1	rs11205668	rs6685278	G	A	50543816	0.4175	8.35218e-08	0.0094725	0.0017674	0.894079	ELAVL4	0	intronic	1.784	7	9	0
1	1	rs11205668	rs6688605	G	A	50544749	0.3688	8.18088e-07	0.0087416	0.0017727	0.741334	ELAVL4	0	intronic	1.384	7	9	0
1	1	rs11205668	rs7520915	T	A	50555662	0.3588	4.21017e-06	0.0080931	0.0017591	0.705569	ELAVL4	0	intronic	1.354	7	9	0
1	1	rs11205668	rs11583200	T	C	50559820	0.3728	1.33475e-06	0.0085235	0.001763	0.757748	ELAVL4	0	intronic	1.998	7	9	0
1	1	rs11205668	rs11806190	T	C	50561884	0.3678	6.74373e-06	0.0079712	0.0017707	0.7385	ELAVL4	0	intronic	3.601	5	7	0
1	1	rs11205668	rs12743369	G	A	50564416	0.4374	5.37403e-07	0.0088561	0.0017668	0.963149	ELAVL4	0	intronic	15.48	3a	7	0
1	1	rs11205668	rs4357572	A	T	50576710	0.4583	4.59092e-06	0.0080788	0.0017629	0.752628	ELAVL4	0	intronic	17.1	6	1	0
1	1	rs11205668	rs4926549	T	G	50587294	0.4592	5.82237e-06	0.0079916	0.0017631	0.749193	ELAVL4	0	intronic	0.726	7	5	0
1	2	rs61786416	rs112432093	T	G	97070467	0.1223	NA	NA	NA	0.839032	NDUFS5P2	20177	intergenic	0.665	7	5	0
1	2	rs61786416	rs59498175	T	C	97072067	0.1233	NA	NA	NA	0.849081	NDUFS5P2	21777	intergenic	3.4	7	15	0
1	2	rs61786416	rs75142117	A	G	97078413	0.1233	8.55855e-08	0.0094227	0.0017596	0.849081	NDUFS5P2	28123	intergenic	0.519	6	9	1
1	2	rs61786416	rs56702708	A	G	97079768	0.1233	8.17335e-08	0.0094373	0.0017596	0.849081	NDUFS5P2	29478	intergenic	8.934	7	15	1
1	2	rs61786416	rs6673199	G	A	97083585	0.1233	8.44112e-08	0.0094273	0.0017596	0.849081	NDUFS5P2	33295	intergenic	2.518	7	7	1
1	2	rs61786416	rs4144139	T	C	97085353	0.1233	1.22152e-07	0.0091911	0.0017373	0.849081	NDUFS5P2	35063	intergenic	3.395	7	7	1
1	2	rs61786416	rs72721906	A	T	97092253	0.1233	1.37057e-07	0.0091538	0.0017372	0.849081	NDUFS5P2	41963	intergenic	0.856	6	5	1
1	2	rs61786416	rs72721907	A	G	97092428	0.1233	8.93305e-08	0.0094096	0.0017597	0.849081	NDUFS5P2	42138	intergenic	2.231	6	5	1
1	2	rs61786416	rs67854343	A	T	97092802	0.1233	8.73977e-08	0.0094166	0.0017597	0.849081	NDUFS5P2	42512	intergenic	2.636	7	5	1
1	2	rs61786416	rs57127929	G	A	97092848	0.1233	NA	NA	NA	0.849081	NDUFS5P2	42558	intergenic	0.92	6	5	1
1	2	rs61786416	rs61789316	A	G	97093861	0.1233	8.33489e-08	0.009432	0.0017598	0.849081	NDUFS5P2	43571	intergenic	1.265	7	5	1
1	2	rs61786416	rs72721909	A	G	97098696	0.1233	1.19895e-07	0.0091979	0.0017375	0.849081	RPL7P9	45734	intergenic	0.76	5	5	1
1	2	rs61786416	rs72721911	A	T	97098716	0.1233	1.1984e-07	0.009198	0.0017375	0.849081	RPL7P9	45714	intergenic	2.546	7	5	1
1	2	rs61789318	rs61789318	G	T	97099041	0.08847	1.826e-08	0.0098512	0.0017504	1	RPL7P9	45389	intergenic	2.915	6	5	0
1	2	rs61786416	rs17115571	G	A	97100996	0.1223	1.04809e-07	0.0093682	0.0017615	0.891977	RPL7P9	43434	intergenic	4.901	7	7	1
1	2	rs61786416	rs2132425	A	G	97102450	0.1223	9.64495e-08	0.0093903	0.0017607	0.891977	RPL7P9	41980	intergenic	0.918	7	5	1
1	2	rs61786416	rs61787887	G	T	97119146	0.1233	1.79102e-07	0.0090744	0.0017384	0.936934	RPL7P9	25284	intergenic	0.131	7	9	1
1	2	rs61786416	rs12042003	G	T	97129720	0.1233	1.97197e-07	0.0090433	0.0017384	0.936934	RPL7P9	14710	intergenic	3.257	6	9	1
1	2	rs61786416	rs12026342	A	C	97137884	0.1233	1.86252e-07	0.009061	0.0017383	0.936934	RPL7P9	6546	intergenic	3.919	7	9	1
1	2	rs61786416	rs12027898	A	C	97144187	0.1233	1.962e-07	0.0090448	0.0017384	0.936934	RPL7P9	0	downstream	3.475	5	14	1
1	2	rs61786416	rs61759529	G	T	97145162	0.1233	1.89802e-07	0.0090559	0.0017384	0.936934	RPL7P9	0	ncRNA_exonic	12.81	6	14	1
1	2	rs61786416	rs2021641	T	C	97153920	0.1213	1.72982e-07	0.0090815	0.0017376	0.990842	RN7SKP270	7492	intergenic	2.672	7	7	1
1	2	rs61786416	rs17525106	G	A	97166150	0.1213	8.01678e-08	0.0094472	0.0017603	0.990842	RN7SKP270	4427	intergenic	12.76	7	5	1
1	2	rs61786416	rs12035225	T	G	97170089	0.1213	1.02447e-07	0.0092477	0.0017375	0.990842	RN7SKP270	8366	intergenic	11.63	6	14	1
1	2	rs61786416	rs17525524	G	C	97199573	0.1223	4.54046e-08	0.0094985	0.0017369	1	PTBP2	0	intronic	3.131	7	4	1
1	2	rs61786416	rs66705010	A	T	97202841	0.1223	2.29456e-08	0.0098305	0.0017591	1	PTBP2	0	intronic	4.923	7	4	0
1	2	rs61786416	rs61786389	G	A	97210113	0.1223	4.06818e-08	0.0095327	0.001737	1	PTBP2	0	intronic	3.263	5	4	1
1	2	rs61786416	rs12022277	G	A	97219871	0.1223	3.96643e-08	0.0095405	0.001737	1	PTBP2	0	intronic	0.299	7	4	1
1	2	rs61786416	rs2391782	G	A	97226675	0.1223	3.20996e-08	0.0096044	0.0017369	1	PTBP2	0	intronic	2.869	NA	2	1
1	2	rs61786416	rs199672750	A	C	97227524	0.1223	NA	NA	NA	1	PTBP2	0	intronic	4.27	7	4	0
1	2	rs61786416	rs201634590	C	T	97227525	0.1223	NA	NA	NA	1	PTBP2	0	intronic	0.607	7	4	0
1	2	rs61786416	rs78334761	G	C	97228107	0.1223	NA	NA	NA	1	PTBP2	0	intronic	3.016	6	4	0
1	2	rs61786416	rs61786398	G	A	97230156	0.1223	2.65522e-08	0.0097875	0.0017594	1	PTBP2	0	intronic	0.91	4	4	1
1	2	rs61786416	rs61786400	T	C	97241849	0.1223	6.70811e-08	0.0093753	0.0017365	1	PTBP2	0	intronic	1.896	7	4	1
1	2	rs61786416	rs61786401	G	A	97242453	0.1223	4.07568e-08	0.0095322	0.001737	1	PTBP2	0	intronic	1.081	6	4	1
1	2	rs61786416	rs12037594	T	G	97247761	0.1223	4.08978e-08	0.0095311	0.001737	1	PTBP2	0	intronic	9.766	7	4	1
1	2	rs61786416	rs17115733	A	G	97249796	0.1223	4.11623e-08	0.0095291	0.001737	1	PTBP2	0	intronic	4.493	6	4	1
1	2	rs61786416	rs6702379	T	G	97259129	0.1223	3.11889e-08	0.0097373	0.0017593	1	PTBP2	0	intronic	0.06	7	4	1
1	2	rs61786416	rs113658986	G	A	97265063	0.1223	4.81393e-08	0.0094809	0.001737	1	PTBP2	0	intronic	1.861	7	4	1
1	2	rs61786416	rs61786416	G	A	97283538	0.1223	1.65806e-08	0.0098016	0.0017365	1	PTBP2	0	UTR3	2.495	7	4	1
1	2	rs61786416	rs61786421	A	T	97291311	0.1322	2.80608e-08	0.0096206	0.0017324	0.916837	PTBP2	2017	intergenic	12.08	7	4	1
1	2	rs61786416	rs12024594	G	A	97293023	0.1322	2.96415e-08	0.0096023	0.0017321	0.916837	PTBP2	3729	intergenic	1.791	5	5	1
1	2	rs61786416	rs61786423	G	A	97298667	0.1322	2.63694e-08	0.0096612	0.0017363	0.916837	PTBP2	9373	intergenic	2.439	6	5	1
1	2	rs61786416	rs61786426	C	T	97312384	0.1292	3.39703e-08	0.0096303	0.0017447	0.760749	PTBP2	23090	intergenic	6.867	6	14	1
1	2	rs61786416	rs76712526	A	G	97363685	0.1292	8.84912e-08	0.0093207	0.0017425	0.700043	ENSG00000212039	4570	intergenic	10.37	7	9	1
1	2	rs61786416	rs12027936	C	T	97365196	0.1292	8.23e-08	0.0093439	0.0017426	0.700043	ENSG00000212039	3059	intergenic	1.663	6	9	1
1	2	rs61786416	rs731925	A	G	97412364	0.1193	7.00487e-07	0.0086428	0.001742	0.642082	ENSG00000265771	11145	intergenic	6.091	NA	14	1
1	2	rs61786416	rs11165746	T	G	97429246	0.1203	8.76799e-07	0.0085645	0.0017416	0.635381	ENSG00000265771	28027	intergenic	9.067	7	5	1
1	2	rs61786416	rs10493889	C	T	97447183	0.1193	4.2335e-07	0.0088073	0.0017412	0.627348	ENSG00000265771	45964	intergenic	15.65	5	5	1
1	3	rs12748895	rs12037564	A	G	183270738	0.4722	1.82264e-08	0.0097951	0.0017404	0.960449	NMNAT2	0	intronic	6.081	5	5	1
1	3	rs12748895	rs12748895	T	C	183272486	0.4622	1.94044e-09	-0.010456	0.0017419	1	NMNAT2	0	intronic	0.439	4	2	1
1	3	rs12748895	rs536586	A	C	183278553	0.4473	5.0038e-08	-0.0094854	0.00174	0.824322	NMNAT2	0	intronic	4.089	NA	5	1
1	3	rs12748895	rs602182	T	G	183279029	0.4463	5.70427e-08	-0.0094447	0.00174	0.821267	NMNAT2	0	intronic	6.254	NA	5	1
1	3	rs10911301	rs10911301	G	A	183282575	0.497	1.82936e-09	-0.01049	0.0017447	1	NMNAT2	0	intronic	2.43	1b	5	1
1	3	rs10911301	rs10911302	A	G	183283969	0.494	1.96426e-09	-0.010473	0.0017453	0.98863	NMNAT2	0	intronic	2.711	6	5	1
1	3	rs10911301	rs10911304	T	G	183286581	0.4891	4.6302e-09	-0.010226	0.0017451	0.910935	NMNAT2	0	intronic	0.005	6	5	1
1	3	rs10911301	rs10911305	A	G	183286777	0.4901	5.88437e-09	-0.010172	0.0017477	0.914569	NMNAT2	0	intronic	13.53	6	5	1
1	3	rs10911301	rs10911306	T	C	183287679	0.498	2.7555e-09	-0.010376	0.0017451	0.943255	NMNAT2	0	intronic	6.053	4	2	1
1	3	rs10911301	rs1411393	A	G	183290145	0.4891	4.21988e-09	-0.010268	0.0017476	0.918588	NMNAT2	0	intronic	4.157	6	2	1
1	3	rs10911301	rs10911309	G	A	183293707	0.4901	5.0188e-09	-0.010218	0.0017477	0.914569	NMNAT2	0	intronic	1.405	7	5	1
1	3	rs10911301	rs4651152	G	C	183294430	0.4891	4.81837e-09	-0.010229	0.0017476	0.903894	NMNAT2	0	intronic	9.02	6	5	1
1	3	rs10911301	rs4549998	G	A	183295930	0.4901	4.62168e-09	-0.010242	0.0017476	0.914569	NMNAT2	0	intronic	3.076	1f	5	1
1	3	rs10911301	rs4630090	T	C	183296270	0.4901	4.58775e-09	-0.010244	0.0017476	0.914569	NMNAT2	0	intronic	2.159	7	5	1
1	3	rs10911301	rs12033696	T	C	183297422	0.4901	4.38834e-09	-0.010257	0.0017476	0.914569	NMNAT2	0	intronic	2.634	4	2	1
1	3	rs10911301	rs12750586	A	G	183297476	0.4901	4.27366e-09	-0.010264	0.0017476	0.914569	NMNAT2	0	intronic	2.939	4	2	1
1	3	rs10911301	rs12122499	C	A	183297613	0.4901	4.36717e-09	-0.010258	0.0017476	0.914569	NMNAT2	0	intronic	1.672	4	5	1
1	3	rs10911301	rs12122568	C	A	183297826	0.4901	4.35311e-09	-0.010259	0.0017476	0.914569	NMNAT2	0	intronic	3.473	4	5	1
1	3	rs10911301	rs12130162	T	C	183297930	0.4901	4.38733e-09	-0.010257	0.0017476	0.914569	NMNAT2	0	intronic	1.403	5	5	1
1	3	rs10911301	rs12130199	T	C	183298008	0.4901	4.36415e-09	-0.010258	0.0017476	0.914569	NMNAT2	0	intronic	3.793	5	5	1
1	3	rs10911301	rs12145095	A	G	183298049	0.4901	4.38531e-09	-0.010257	0.0017476	0.914569	NMNAT2	0	intronic	7.496	5	5	1
1	3	rs10911301	rs10911310	C	G	183298219	0.4901	4.41876e-09	-0.010255	0.0017476	0.914569	NMNAT2	0	intronic	0.167	5	5	1
1	3	rs10911301	rs10911311	T	C	183298342	0.4901	4.41876e-09	-0.010255	0.0017476	0.914569	NMNAT2	0	intronic	3.614	7	5	1
1	3	rs10911301	rs10797873	C	G	183298463	0.4901	4.42894e-09	-0.010254	0.0017476	0.914569	NMNAT2	0	intronic	0.05	5	5	1
1	3	rs10911301	rs10797874	C	T	183298495	0.4901	4.42894e-09	-0.010254	0.0017476	0.914569	NMNAT2	0	intronic	1.395	5	5	1
1	3	rs10911301	rs10797875	C	T	183298502	0.4901	4.42894e-09	-0.010254	0.0017476	0.914569	NMNAT2	0	intronic	2.899	5	5	1
1	3	rs10911301	rs4651153	C	T	183298610	0.4901	3.88776e-09	-0.010292	0.0017477	0.914569	NMNAT2	0	intronic	1.281	4	5	1
1	3	rs10911301	rs10911312	G	A	183299013	0.4901	4.41266e-09	-0.010255	0.0017476	0.914569	NMNAT2	0	intronic	0.685	7	5	1
1	3	rs10911301	rs10911313	A	G	183299153	0.4901	4.92606e-09	-0.010224	0.0017477	0.914569	NMNAT2	0	intronic	4.095	5	5	1
1	3	rs10911301	rs1330224	A	G	183299502	0.4901	4.35311e-09	-0.010259	0.0017476	0.914569	NMNAT2	0	intronic	1.806	NA	5	1
1	3	rs10911301	rs953273	G	A	183299611	0.4901	4.3381e-09	-0.01026	0.0017476	0.914569	NMNAT2	0	intronic	0.696	4	5	1
1	3	rs10911301	rs953274	C	T	183299881	0.4901	4.35111e-09	-0.010259	0.0017476	0.914569	NMNAT2	0	intronic	3.201	4	2	1
1	3	rs10911301	rs952448	C	T	183300112	0.4901	4.42588e-09	-0.010254	0.0017476	0.914569	NMNAT2	0	intronic	6.696	NA	2	1
1	3	rs10911301	rs952446	A	G	183300311	0.4901	NA	NA	NA	0.914569	NMNAT2	0	intronic	0.51	NA	2	1
1	3	rs10911301	rs2020986	A	G	183300515	0.4901	3.99117e-09	-0.010284	0.0017476	0.914569	NMNAT2	0	intronic	2.822	3a	2	1
1	3	rs10911301	rs10911316	C	T	183313912	0.4404	1.06586e-08	-0.010006	0.0017492	0.734178	NMNAT2	0	intronic	3.3	7	5	1
1	3	rs10911301	rs944190	T	G	183314293	0.4105	0.000743533	-0.0059203	0.0017552	0.67864	NMNAT2	0	intronic	6.211	NA	5	1
1	3	rs10911301	rs1360277	A	T	183314641	0.4095	0.00085055	-0.0058461	0.0017525	0.670485	NMNAT2	0	intronic	2.549	5	5	1
1	3	rs10911301	rs10911317	A	G	183316328	0.493	4.32514e-09	-0.010244	0.0017448	0.962164	NMNAT2	0	intronic	0.068	7	5	1
1	3	rs10911301	rs3924298	G	T	183317819	0.4205	0.00138102	-0.0056257	0.0017588	0.69957	NMNAT2	0	intronic	3.115	6	2	1
1	3	rs10911301	rs649614	T	C	183320192	0.3837	5.48151e-06	-0.0079181	0.0017419	0.601941	NMNAT2	0	intronic	3.66	NA	5	1
1	3	rs10911301	rs779152	G	A	183322317	0.499	1.17463e-08	-0.0099425	0.0017432	0.9023	NMNAT2	0	intronic	1.213	NA	5	1
1	3	rs10911301	rs10911318	T	C	183323643	0.4891	6.23878e-09	-0.010148	0.0017465	0.939687	NMNAT2	0	intronic	1.902	6	5	1
1	3	rs10911301	rs564146	G	A	183323708	0.3837	5.3629e-06	-0.0079263	0.001742	0.601941	NMNAT2	0	intronic	0.404	NA	5	1
1	3	rs10911301	rs12125953	A	G	183323804	0.4891	6.51178e-09	-0.010137	0.0017467	0.939687	NMNAT2	0	intronic	0.654	7	5	1
1	3	rs10911301	rs681054	C	T	183324354	0.3837	5.57314e-06	-0.0079065	0.0017407	0.601941	NMNAT2	0	intronic	1.195	NA	5	1
1	3	rs10911301	rs664422	T	C	183325722	0.3837	5.55009e-06	-0.007908	0.0017407	0.601941	NMNAT2	0	intronic	1.991	5	5	1
1	3	rs10911301	rs502870	G	T	183325796	0.3827	5.45255e-06	-0.0079203	0.001742	0.600665	NMNAT2	0	intronic	3.444	NA	5	1
1	3	rs10911301	rs548292	G	A	183326828	0.3837	5.57571e-06	-0.0079064	0.0017407	0.601941	NMNAT2	0	intronic	0.233	NA	5	1
1	3	rs10911301	rs634375	T	C	183327866	0.499	1.22885e-08	-0.0099299	0.0017434	0.909562	NMNAT2	0	intronic	5.273	NA	5	1
1	3	rs10911301	rs2811558	T	G	183330413	0.499	1.02896e-08	-0.0099804	0.001743	0.909562	NMNAT2	0	intronic	1.527	5	5	1
1	3	rs10911301	rs554395	G	C	183333554	0.3936	4.86968e-06	-0.0079792	0.0017458	0.616399	NMNAT2	0	intronic	11.61	5	2	1
1	3	rs10911301	rs2485931	G	A	183333785	0.499	NA	NA	NA	0.9023	NMNAT2	0	intronic	1.813	7	5	1
1	3	rs10911301	rs2788059	A	T	183333805	0.3936	NA	NA	NA	0.616399	NMNAT2	0	intronic	0.123	6	5	0
1	3	rs10911301	rs502849	C	T	183335467	0.3936	4.90117e-06	-0.0079704	0.0017444	0.616399	NMNAT2	0	intronic	0.367	5	5	1
1	3	rs10911301	rs502937	T	C	183335495	0.3936	4.86855e-06	-0.0079789	0.0017458	0.616399	NMNAT2	0	intronic	1.547	5	5	1
1	3	rs10911301	rs673593	T	G	183338207	0.499	9.69617e-09	-0.0099968	0.0017428	0.909562	NMNAT2	0	intronic	1.232	NA	1	1
1	3	rs10911301	rs2811559	A	G	183338826	0.3956	4.54779e-06	-0.0079973	0.0017443	0.620396	NMNAT2	0	intronic	0.598	5	5	1
1	3	rs10911301	rs3122177	C	T	183348252	0.4761	7.18456e-08	-0.009388	0.0017428	0.804839	NMNAT2	0	intronic	0.863	7	5	1
1	3	rs10911301	rs2811566	A	G	183362544	0.4781	6.56448e-08	-0.0094146	0.0017425	0.827196	NMNAT2	0	intronic	1.578	7	5	1
1	3	rs10911301	rs2788060	T	C	183362646	0.4781	5.70558e-08	-0.0094582	0.0017425	0.827196	NMNAT2	0	intronic	1.136	6	5	1
1	3	rs10911301	rs9425595	T	C	183369036	0.4781	NA	NA	NA	0.827196	NMNAT2	0	intronic	0.087	7	5	1
1	3	rs10911301	rs12145853	A	G	183369250	0.4781	NA	NA	NA	0.827196	NMNAT2	0	intronic	4.199	6	5	1
1	3	rs10911301	rs6690052	T	A	183370057	0.4781	4.58881e-08	-0.0095261	0.0017426	0.827196	NMNAT2	0	intronic	0.499	6	5	1
1	3	rs10911301	rs1361198	G	T	183380611	0.4692	5.84925e-08	-0.0094664	0.0017454	0.855041	NMNAT2	0	intronic	2.128	6	5	1
1	3	rs10911301	rs4652800	C	T	183383643	0.4692	5.87354e-08	-0.0094649	0.0017454	0.855041	NMNAT2	0	intronic	0.199	4	5	1
1	3	rs10911301	rs12745288	A	G	183384395	0.4692	6.22157e-08	-0.0094469	0.0017454	0.855041	NMNAT2	0	intronic	3.412	7	5	1
1	3	rs10911301	rs12035399	G	A	183386537	0.4732	6.64661e-08	-0.0094283	0.0017458	0.838336	NMNAT2	0	intronic	8.618	4	1	1
1	3	rs10911301	rs12074508	C	T	183388259	0.4712	1.00415e-07	-0.009289	0.0017441	0.832177	NMNAT2	0	upstream	1.252	7	5	1
1	3	rs10911301	rs12731807	T	G	183394037	0.4702	1.10332e-07	-0.0092659	0.0017453	0.843199	NMNAT2	6300	intergenic	4.782	5	13	1
1	3	rs10911301	rs1338373	A	G	183399613	0.4563	3.81593e-07	-0.008854	0.0017436	0.800266	NMNAT2	11876	intergenic	14.02	NA	5	1
1	3	rs10911301	rs10752912	A	G	183401215	0.4563	3.99301e-07	-0.008839	0.0017436	0.800266	NMNAT2	13478	intergenic	1.521	4	5	1
1	3	rs10911301	rs2023600	C	T	183401670	0.4871	2.15477e-07	-0.009054	0.001746	0.80752	NMNAT2	13933	intergenic	1.435	NA	5	1
1	3	rs10911301	rs12074081	A	G	183402201	0.4563	3.47776e-07	-0.008884	0.0017434	0.800266	NMNAT2	14464	intergenic	0.106	6	5	1
1	3	rs10911301	rs7531089	G	C	183403843	0.4592	5.73984e-06	0.0079285	0.001748	0.608782	NMNAT2	16106	intergenic	9.504	6	1	1
2	4	rs925229	rs3795948	C	T	23926659	0.4642	2.37958e-06	0.0082262	0.0017435	0.731761	KLHL29	0	exonic	9.645	5	4	1
2	4	rs925229	rs3795949	A	C	23926932	0.4642	1.80967e-06	0.0083223	0.0017434	0.739295	KLHL29	0	intronic	2.042	5	4	1
2	4	rs925229	rs4233701	C	G	23929086	0.4632	1.60916e-06	0.0083625	0.0017432	0.748111	KLHL29	0	intronic	1.429	1f	4	1
2	4	rs925229	rs4233702	T	G	23929181	0.4632	1.61287e-06	0.0083616	0.0017432	0.748111	KLHL29	0	intronic	2.899	2b	4	1
2	4	rs925229	rs9261	T	C	23931036	0.4632	1.51043e-06	0.0083894	0.0017442	0.748111	KLHL29	0	UTR3	0.006	6	4	1
2	4	rs925229	rs4665635	G	A	23932528	0.4722	5.29298e-06	0.0079334	0.0017425	0.707292	KLHL29	1052	intergenic	4.763	5	4	1
2	4	rs925229	rs2879609	T	C	23939480	0.4602	9.56753e-07	0.0085429	0.0017433	0.755597	KLHL29	8004	intergenic	4.635	6	1	1
2	4	rs925229	rs12478701	C	T	23941348	0.4602	1.01158e-06	0.0085239	0.0017433	0.755597	KLHL29	9872	intergenic	1.109	1f	4	1
2	4	rs925229	rs10169467	A	G	23946223	0.4592	9.517e-07	0.0085436	0.0017431	0.751113	KLHL29	14747	intergenic	3.723	5	4	1
2	4	rs925229	rs7608282	A	G	23948586	0.4592	9.66273e-07	0.0085422	0.0017439	0.751113	KLHL29	17110	intergenic	7.673	6	4	1
2	4	rs925229	rs61463699	A	T	23950973	0.4334	7.57879e-07	0.0086252	0.0017439	0.844745	KLHL29	19497	intergenic	13.07	6	4	1
2	4	rs925229	rs56917371	A	C	23951108	0.4314	7.18125e-07	0.0086433	0.0017438	0.851111	KLHL29	19632	intergenic	14.84	6	4	1
2	4	rs925229	rs9798012	T	C	23953833	0.4314	1.26154e-06	0.00845	0.0017438	0.851111	ATAD2B	17701	intergenic	17.5	6	4	1
2	4	rs925229	rs2042481	T	C	23956799	0.3857	4.12382e-07	0.008844	0.0017467	0.739988	ATAD2B	14735	intergenic	1.15	7	4	1
2	4	rs925229	rs77583024	C	A	23964130	0.4314	NA	NA	NA	0.866374	ATAD2B	7404	intergenic	2.382	6	5	1
2	4	rs925229	rs17461695	T	A	23970720	0.4294	7.72859e-08	0.0093724	0.0017442	0.865718	ATAD2B	0	downstream	1.786	7	4	1
2	4	rs925229	rs6751857	C	T	23973799	0.4245	6.12915e-08	0.0094529	0.0017456	0.889214	ATAD2B	0	UTR3	6.643	7	4	1
2	4	rs925229	rs918812	C	T	23988899	0.4294	8.49767e-08	0.0093429	0.0017443	0.872841	ATAD2B	0	intronic	2.184	7	4	1
2	4	rs925229	rs7569226	A	G	23992582	0.4245	NA	NA	NA	0.851871	ATAD2B	0	intronic	1.624	6	4	1
2	4	rs925229	rs7558918	G	T	23997661	0.4254	7.51104e-08	0.0093851	0.0017449	0.878412	ATAD2B	0	intronic	3.896	6	4	1
2	4	rs925229	rs9636434	G	A	24009163	0.4046	6.19298e-05	0.0069907	0.0017453	0.738479	ATAD2B	0	intronic	7.974	5	4	1
2	4	rs925229	rs13009582	A	G	24018480	0.4314	9.2045e-08	0.0093186	0.0017444	0.859848	ATAD2B	0	intronic	1.278	7	4	1
2	4	rs925229	rs4384732	A	C	24033707	0.4284	7.13674e-08	0.0093961	0.0017439	0.869227	ATAD2B	0	intronic	6.82	7	4	1
2	4	rs925229	rs2339923	T	C	24039779	0.4284	8.42364e-08	0.0093449	0.0017441	0.869227	ATAD2B	0	intronic	3.133	6	4	1
2	4	rs925229	rs35379186	C	T	24044352	0.4304	7.88678e-08	0.0093656	0.0017441	0.862762	ATAD2B	0	intronic	12.28	6	4	1
2	4	rs925229	rs34525874	G	A	24044475	0.4304	7.90861e-08	0.0093648	0.0017441	0.862762	ATAD2B	0	intronic	0.368	6	4	1
2	4	rs925229	rs6734395	T	C	24054632	0.4245	6.37529e-08	0.0094311	0.0017439	0.889214	ATAD2B	0	intronic	0.503	6	4	1
2	4	rs925229	rs35832626	T	C	24054647	0.3936	2.04739e-05	0.0074141	0.0017405	0.783258	ATAD2B	0	intronic	4.531	6	4	1
2	4	rs925229	rs12474547	A	G	24060141	0.4294	8.39267e-08	0.0093465	0.0017442	0.872841	ATAD2B	0	intronic	1.736	4	4	1
2	4	rs925229	rs13006587	A	G	24060439	0.3907	1.79929e-05	0.0074786	0.0017439	0.772904	ATAD2B	0	intronic	1.912	6	4	1
2	4	rs925229	rs6719830	C	T	24061034	0.4294	7.98178e-08	0.009364	0.0017445	0.872841	ATAD2B	0	intronic	4.49	7	4	1
2	4	rs925229	rs4233703	G	A	24066193	0.4254	9.07821e-08	0.00932	0.0017439	0.878865	ATAD2B	0	intronic	6.848	7	2	1
2	4	rs925229	rs34416396	T	C	24071170	0.4274	1.03586e-07	0.0092797	0.0017442	0.872245	ATAD2B	0	intronic	1.719	7	4	1
2	4	rs925229	rs4665641	C	T	24076136	0.4274	9.14324e-08	0.0093196	0.0017442	0.872245	ATAD2B	0	intronic	7.999	7	4	1
2	4	rs925229	rs7590252	C	T	24076632	0.4294	9.47982e-08	0.0093098	0.0017445	0.865718	ATAD2B	0	intronic	5.552	7	4	1
2	4	rs925229	rs13020789	C	T	24082868	0.4294	1.05925e-07	0.0092728	0.0017442	0.858625	ATAD2B	0	intronic	0.576	5	4	1
2	4	rs925229	rs4665242	T	C	24085413	0.4264	9.482e-08	0.0093081	0.0017442	0.868148	ATAD2B	0	intronic	0.704	6	4	1
2	4	rs925229	rs2339883	A	G	24093306	0.4264	8.73776e-08	0.0093343	0.0017443	0.868148	ATAD2B	0	intronic	2.274	6	4	1
2	4	rs925229	rs11125284	G	A	24093475	0.4264	9.2406e-08	0.0093165	0.0017443	0.868148	ATAD2B	0	intronic	13.42	6	4	1
2	4	rs925229	rs7566727	A	G	24097389	0.4254	8.72569e-08	0.0093347	0.0017443	0.871223	ATAD2B	0	intronic	0.498	6	4	1
2	4	rs925229	rs2176264	C	T	24104973	0.4284	1.00995e-07	0.0092886	0.0017443	0.875871	ATAD2B	0	intronic	1.613	7	4	1
2	4	rs925229	rs4665245	C	T	24109230	0.4284	1.06341e-07	0.0092722	0.0017443	0.868718	ATAD2B	0	intronic	1.055	7	4	1
2	4	rs925229	rs12463543	A	G	24110089	0.3847	5.61436e-07	0.0087327	0.0017451	0.736387	ATAD2B	0	intronic	0.602	7	4	1
2	4	rs925229	rs17762465	C	G	24110611	0.4284	9.78138e-08	0.0092985	0.0017443	0.868718	ATAD2B	0	intronic	0.379	7	4	1
2	4	rs925229	rs1980164	C	G	24115460	0.4274	1.01391e-07	0.0092874	0.0017443	0.871761	ATAD2B	0	intronic	0.146	6	1	1
2	4	rs925229	rs35598160	A	G	24121957	0.3827	7.22603e-07	0.0086478	0.0017452	0.736783	ATAD2B	0	intronic	2.347	7	5	1
2	4	rs925229	rs17711796	T	C	24123539	0.3827	5.38022e-07	0.0087475	0.0017452	0.736783	ATAD2B	0	intronic	5.469	1a	1	1
2	4	rs925229	rs34326859	T	G	24126812	0.4254	NA	NA	NA	0.870767	ATAD2B	0	intronic	0.056	6	5	1
2	4	rs925229	rs4665644	A	T	24129330	0.4274	1.07275e-07	0.0092697	0.0017444	0.871761	ATAD2B	0	intronic	5.056	6	5	1
2	4	rs925229	rs142874444	T	C	24131211	0.4274	NA	NA	NA	0.871761	ATAD2B	0	intronic	0.703	7	5	1
2	4	rs925229	rs35206932	T	C	24131557	0.3509	NA	NA	NA	0.634837	ATAD2B	0	intronic	0.753	6	5	1
2	4	rs925229	rs13028272	T	C	24134015	0.3837	7.10722e-07	0.0086538	0.0017452	0.739551	ATAD2B	0	intronic	4.825	6	4	1
2	4	rs925229	rs35324570	G	A	24143675	0.4284	1.13058e-07	0.0092527	0.0017443	0.868718	ATAD2B	0	intronic	0.406	6	5	1
2	4	rs925229	rs4488614	A	G	24164129	0.4274	1.55489e-07	0.0091466	0.0017435	0.871761	UBXN2A	0	intronic	6.605	3a	1	1
2	4	rs925229	rs7558300	T	C	24167268	0.4274	1.51252e-07	0.0091577	0.0017439	0.871761	UBXN2A	0	intronic	7.626	5	5	1
2	4	rs925229	rs60490158	A	G	24168188	0.4284	1.49417e-07	0.0091618	0.001744	0.86823	UBXN2A	0	intronic	7.19	5	5	1
2	4	rs925229	rs13009856	T	C	24173167	0.4274	1.74301e-07	0.0091119	0.0017439	0.871761	UBXN2A	0	intronic	2.748	7	5	1
2	4	rs925229	rs34499205	G	A	24174483	0.4274	1.68772e-07	0.0091226	0.001744	0.871761	UBXN2A	0	intronic	4.317	5	5	1
2	4	rs925229	rs4665250	G	A	24179922	0.4274	1.26882e-07	0.0092134	0.0017438	0.871761	UBXN2A	0	intronic	1.344	6	4	1
2	4	rs925229	rs12151849	T	C	24182159	0.4274	1.16091e-07	0.0092393	0.0017434	0.871761	UBXN2A	0	intronic	3.17	6	4	1
2	4	rs925229	rs11125331	T	G	24184620	0.4274	1.31553e-07	0.0092019	0.0017438	0.871761	UBXN2A	0	intronic	0.487	7	4	1
2	4	rs925229	rs11125332	T	C	24184710	0.4274	1.2428e-07	0.00922	0.0017438	0.871761	UBXN2A	0	intronic	1.998	7	4	1
2	4	rs925229	rs4665648	G	C	24186801	0.4284	1.24022e-07	0.0092206	0.0017438	0.875871	UBXN2A	0	intronic	5.016	7	4	1
2	4	rs925229	rs6723491	A	G	24187777	0.4284	1.16493e-07	0.0092406	0.0017438	0.875871	UBXN2A	0	intronic	8.247	7	4	1
2	4	rs925229	rs4665251	C	A	24190263	0.4314	9.74541e-08	0.0092978	0.0017439	0.865359	UBXN2A	0	intronic	14.59	6	4	1
2	4	rs925229	rs10865250	G	T	24193409	0.4274	1.20698e-07	0.0092294	0.0017438	0.878944	UBXN2A	0	intronic	9.705	7	4	1
2	4	rs925229	rs4665649	T	C	24196180	0.4274	1.2933e-07	0.0092073	0.0017438	0.878944	UBXN2A	0	intronic	9.399	6	4	1
2	4	rs925229	rs4665650	C	G	24196272	0.4274	1.29092e-07	0.0092078	0.0017438	0.878944	UBXN2A	0	intronic	1.614	7	4	1
2	4	rs925229	rs61479558	T	C	24196931	0.4274	NA	NA	NA	0.878944	UBXN2A	0	intronic	3.594	7	4	1
2	4	rs925229	rs35631101	A	G	24197402	0.4274	1.26445e-07	0.0092143	0.0017438	0.878944	UBXN2A	0	intronic	6.024	7	4	1
2	4	rs925229	rs1516428	T	C	24199378	0.3847	8.30424e-07	0.0085992	0.0017449	0.737221	UBXN2A	0	intronic	13.26	5	4	1
2	4	rs925229	rs10432638	A	C	24202512	0.3529	7.64188e-05	0.0068894	0.0017418	0.636904	UBXN2A	0	intronic	4.577	7	4	1
2	4	rs925229	rs4665651	A	G	24227450	0.4274	1.02376e-07	0.0092825	0.001744	0.886156	UBXN2A	0	UTR3	2.424	6	5	1
2	4	rs925229	rs925229	G	A	24234440	0.4125	4.6623e-08	0.0095239	0.0017431	1	MFSD2B	0	intronic	0.187	NA	2	1
2	4	rs925229	rs34686340	G	A	24241950	0.4423	6.35477e-08	0.0094319	0.0017438	0.849806	MFSD2B	0	intronic	1.462	6	5	1
2	4	rs925229	rs7561273	G	A	24247514	0.4791	1.73021e-05	0.0074885	0.0017427	0.622754	MFSD2B	0	intronic	1.858	1f	4	1
2	4	rs925229	rs4665652	A	G	24250023	0.4791	1.27585e-05	0.0076043	0.0017424	0.622754	MFSD2B	0	intronic	12.37	7	4	1
2	4	rs925229	rs12618943	G	A	24250822	0.4423	8.46058e-08	0.0093419	0.0017438	0.849806	MFSD2B	0	intronic	0.719	6	4	1
2	4	rs925229	rs4665653	G	A	24251214	0.4751	1.72425e-05	0.0074849	0.0017415	0.612307	MFSD2B	0	intronic	1.523	6	4	1
2	4	rs925229	rs2339940	T	G	24251787	0.4791	1.18631e-05	0.0076316	0.0017423	0.622754	MFSD2B	0	intronic	0.773	NA	4	1
2	4	rs925229	rs3203	C	T	24252417	0.4761	1.71554e-05	0.0074849	0.0017411	0.601418	C2orf44	0	UTR3	0.402	NA	4	1
2	4	rs925229	rs3204	G	A	24252436	0.4433	2.38177e-07	0.0090061	0.001743	0.803372	C2orf44	0	UTR3	3.785	5	4	1
2	5	rs12713315	rs62167289	T	C	56413253	0.2127	3.44667e-06	-0.0079651	0.0017158	0.654873	ENSG00000271894	0	ncRNA_intronic	7.026	4	1	0
2	5	rs12713315	rs62167290	T	C	56413281	0.2127	3.00746e-06	-0.0080146	0.0017161	0.654873	ENSG00000271894	0	ncRNA_intronic	12.69	2b	1	0
2	5	rs12713315	rs11694431	A	G	56416599	0.2117	3.10885e-06	-0.0080045	0.0017164	0.658613	ENSG00000271894	0	ncRNA_intronic	1.595	6	5	0
2	5	rs12713315	rs11694444	T	C	56416772	0.2117	2.94917e-06	-0.008023	0.0017164	0.658613	ENSG00000271894	0	ncRNA_intronic	0.058	7	5	0
2	5	rs12713315	rs11695826	C	G	56417211	0.2127	1.62892e-06	-0.0082294	0.0017163	0.661954	ENSG00000271894	0	ncRNA_intronic	1.419	5	4	0
2	5	rs12713315	rs1030090	T	C	56439314	0.2525	3.84326e-07	-0.0087743	0.0017284	0.703257	ENSG00000271894	0	ncRNA_intronic	3.558	NA	5	1
2	5	rs12612590	rs1119821	C	T	56442304	0.4344	2.83531e-07	0.0089663	0.0017464	0.892303	ENSG00000271894	0	ncRNA_intronic	9.481	NA	5	1
2	5	rs12612590	rs34377123	G	A	56442947	0.4622	5.44377e-08	0.0095002	0.0017475	0.984614	ENSG00000271894	0	ncRNA_intronic	0.934	6	5	1
2	5	rs12713315	rs59813060	T	A	56443479	0.2237	1.33999e-08	-0.0098041	0.0017258	0.81464	ENSG00000271894	0	ncRNA_intronic	2.47	7	5	0
2	5	rs12713315	rs17047623	T	C	56443708	0.2237	1.37088e-08	-0.0097973	0.0017257	0.81464	ENSG00000271894	0	ncRNA_intronic	1.67	6	5	0
2	5	rs12612590	rs727297	G	A	56445414	0.4354	2.20699e-07	0.0090484	0.0017464	0.89547	ENSG00000271894	0	ncRNA_intronic	8.449	NA	5	1
2	5	rs12612590	rs2216324	G	A	56445480	0.4354	2.26778e-07	0.0090397	0.0017465	0.89547	ENSG00000271894	0	ncRNA_intronic	1.987	NA	5	1
2	5	rs12612590	rs17268667	G	A	56446420	0.4344	2.03095e-07	0.0090761	0.0017466	0.884891	ENSG00000271894	0	ncRNA_intronic	2.276	7	4	1
2	5	rs12612590	rs763345	G	A	56447038	0.4344	2.16073e-07	0.009056	0.0017465	0.892303	ENSG00000271894	0	ncRNA_intronic	2.727	NA	5	1
2	5	rs12612590	rs2193475	C	A	56449648	0.4344	2.44906e-07	0.0090136	0.0017463	0.892303	ENSG00000271894	0	ncRNA_intronic	3.486	NA	5	1
2	5	rs12612590	rs7579447	G	A	56450038	0.4344	2.29774e-07	0.0090332	0.001746	0.892303	ENSG00000271894	0	ncRNA_intronic	1.915	5	5	1
2	5	rs12713315	rs1549028	C	G	56451039	0.2227	2.44906e-08	-0.0096322	0.0017271	0.819525	ENSG00000271894	0	ncRNA_intronic	1.291	6	5	0
2	5	rs12713315	rs6545560	G	A	56452097	0.2247	1.72385e-08	-0.0097338	0.0017265	0.818348	ENSG00000271894	0	ncRNA_intronic	0.107	6	5	0
2	5	rs12612590	rs1160648	T	C	56453588	0.4314	6.96947e-08	0.0094117	0.0017455	0.88262	ENSG00000271894	0	ncRNA_intronic	1.986	NA	5	1
2	5	rs12612590	rs56265195	G	C	56457718	0.4354	1.41156e-07	0.0091885	0.0017456	0.88838	ENSG00000271894	0	ncRNA_intronic	3.456	4	2	1
2	5	rs12713315	rs12713315	C	T	56458509	0.2594	2.44343e-09	-0.010344	0.001734	1	ENSG00000271894	0	ncRNA_intronic	0.063	7	2	0
2	5	rs12612590	rs12612590	G	A	56461082	0.4642	4.22961e-08	0.0095557	0.0017434	1	ENSG00000271894	0	ncRNA_intronic	6.504	6	5	1
2	5	rs12612590	rs1861772	G	T	56461906	0.4334	1.59809e-07	0.0091493	0.0017457	0.889169	ENSG00000271894	0	ncRNA_intronic	19.66	NA	5	1
2	5	rs12713315	rs985792	G	T	56464559	0.2237	2.96961e-08	-0.0096212	0.0017356	0.823227	ENSG00000271894	0	ncRNA_intronic	6.46	NA	5	0
2	5	rs2869529	rs34380906	T	A	56466049	0.3678	3.77659e-08	-0.0095649	0.0017387	0.804827	ENSG00000271894	0	ncRNA_intronic	2.48	7	5	1
2	5	rs12713315	rs17047680	A	G	56466964	0.2247	2.25892e-08	-0.0096918	0.0017335	0.818348	ENSG00000271894	0	ncRNA_intronic	3.357	5	5	0
2	5	rs12713315	rs6759030	C	A	56467748	0.2237	3.38922e-08	-0.0095709	0.0017338	0.823227	ENSG00000271894	0	ncRNA_intronic	0.364	7	5	0
2	5	rs2869529	rs2869529	C	T	56472159	0.3559	1.89322e-09	-0.010448	0.0017393	1	ENSG00000271894	0	ncRNA_intronic	1.756	4	5	1
2	5	rs12713315	rs2080606	C	G	56472393	0.2356	5.4325e-09	-0.010115	0.001734	0.879195	ENSG00000271894	0	ncRNA_intronic	7.06	5	5	0
2	5	rs2869529	rs11695736	A	G	56477224	0.3429	7.52835e-09	-0.010056	0.0017401	0.939315	ENSG00000271894	0	ncRNA_intronic	2.438	5	5	1
2	5	rs12713315	rs214046	C	T	56491604	0.2515	6.20012e-08	0.0093199	0.0017218	0.784934	ENSG00000271894	0	ncRNA_intronic	0.882	NA	5	0
2	5	rs12713315	rs214045	G	A	56496589	0.2624	8.02047e-08	0.0093094	0.0017346	0.741479	ENSG00000271894	0	ncRNA_intronic	2.204	NA	5	0
2	6	rs13028903	rs13028903	T	C	59951465	0.4334	1.74181e-14	0.013329	0.0017381	1	ENSG00000271955:ENSG00000233891	0	ncRNA_intronic:ncRNA_intronic	1.364	7	9	0
2	6	rs1442883	rs10176878	C	T	59952274	0.161	6.68498e-08	0.0093353	0.0017289	0.627985	ENSG00000233891:ENSG00000271955	0	ncRNA_intronic:ncRNA_intronic	6.059	6	5	0
2	6	rs13028903	rs1442877	A	G	59952652	0.3926	3.97192e-14	0.013134	0.0017369	0.847625	ENSG00000233891:ENSG00000271955	0	ncRNA_intronic:ncRNA_intronic	0.076	NA	7	0
2	6	rs13028903	rs6545747	A	C	59952846	0.4861	4.7863e-11	0.011444	0.0017399	0.772692	ENSG00000233891:ENSG00000271955	0	ncRNA_intronic:ncRNA_intronic	0.005	6	7	0
2	6	rs1442883	rs1442876	T	C	59953839	0.162	3.661e-08	0.0095121	0.0017274	0.632697	ENSG00000233891:ENSG00000271955	0	ncRNA_intronic:ncRNA_intronic	0.118	NA	2	0
2	6	rs10168190	rs10180806	T	A	59955924	0.4672	2.49517e-09	0.010378	0.0017408	0.735777	ENSG00000233891:ENSG00000271955	0	ncRNA_intronic:ncRNA_intronic	16.96	7	5	0
2	6	rs1442883	rs7566342	C	T	59959846	0.167	3.40565e-08	0.009595	0.0017384	0.663429	ENSG00000271955:ENSG00000233891	0	ncRNA_intronic:ncRNA_intronic	2.176	7	5	0
2	6	rs1442883	rs17597864	C	T	59960023	0.164	5.07925e-08	0.0093919	0.0017237	0.640519	ENSG00000233891:ENSG00000271955	0	ncRNA_intronic:ncRNA_intronic	2.879	6	5	0
2	6	rs1442883	rs11685305	C	T	59961318	0.164	3.83619e-08	0.0095075	0.0017292	0.640519	ENSG00000271955	0	ncRNA_intronic	3.72	7	5	0
2	6	rs10168190	rs4672310	T	C	59961634	0.4871	1.90546e-11	0.011688	0.0017409	0.801948	ENSG00000271955	0	ncRNA_intronic	0.272	6	5	0
2	6	rs1442883	rs72814328	T	C	59962406	0.1633	NA	NA	NA	0.600157	ENSG00000271955	0	ncRNA_intronic	16.57	7	5	0
2	6	rs10168190	rs12473065	G	T	59962684	0.498	9.30465e-10	0.010655	0.0017408	0.792253	ENSG00000271955	0	ncRNA_intronic	17.41	6	5	0
2	6	rs1442883	rs68127723	C	T	59970064	0.162	1.6684e-08	0.0097701	0.0017312	0.653139	ENSG00000271955	0	ncRNA_intronic	4.302	6	5	0
2	6	rs1442883	rs17656897	C	T	59970477	0.162	2.6212e-08	0.0095765	0.0017208	0.653139	ENSG00000271955	0	ncRNA_intronic	3.576	6	5	0
2	6	rs1442883	rs1442883	A	C	59970660	0.2276	1.76035e-10	0.011064	0.0017339	1	ENSG00000271955	0	ncRNA_intronic	10.75	NA	5	0
2	6	rs1442883	rs57910953	G	A	59971668	0.162	1.64059e-08	0.0097651	0.0017295	0.653139	ENSG00000271955	0	ncRNA_intronic	16.91	7	5	0
2	6	rs1442883	rs11679028	G	A	59973741	0.165	1.54703e-08	0.0098293	0.0017377	0.665017	ENSG00000271955	0	ncRNA_intronic	10.27	7	5	0
2	6	rs1442883	rs11696100	G	A	59975400	0.161	3.34657e-08	0.0095479	0.0017289	0.659552	ENSG00000271955	0	ncRNA_intronic	3.157	5	5	0
2	6	rs10168190	rs6545749	G	C	59975486	0.496	1.39508e-09	0.010547	0.0017415	0.809119	ENSG00000271955	0	ncRNA_intronic	1.548	5	5	0
2	6	rs1442883	rs59160084	C	G	59975650	0.161	3.13906e-08	0.0095694	0.0017293	0.659552	ENSG00000271955	0	ncRNA_intronic	0.141	5	5	0
2	6	rs1442883	rs60358748	G	T	59977067	0.161	2.11787e-08	0.0096886	0.0017294	0.659552	ENSG00000271955	0	ncRNA_intronic	0.865	6	5	0
2	6	rs1442883	rs113166253	C	T	59978857	0.164	1.55489e-08	0.0098889	0.0017485	0.682441	ENSG00000271955	0	ncRNA_intronic	0.062	6	5	0
2	6	rs1442883	rs67612869	G	A	59978985	0.165	NA	NA	NA	0.676037	ENSG00000271955	0	ncRNA_intronic	2.47	6	5	0
2	6	rs1442883	rs57270700	C	A	59979717	0.165	1.4983e-08	0.0099005	0.0017486	0.676037	ENSG00000271955	0	ncRNA_intronic	0.277	3a	5	0
2	6	rs1442883	rs11693165	A	G	59980995	0.17	8.12831e-07	0.0085839	0.0017403	0.624014	ENSG00000271955	0	ncRNA_intronic	7.715	7	5	0
2	6	rs1442883	rs11694381	A	G	59981123	0.171	8.09096e-07	0.0085854	0.0017403	0.629014	ENSG00000271955	0	ncRNA_intronic	3.079	7	5	0
2	6	rs10168190	rs10168190	A	C	59983904	0.4761	1.51043e-09	0.010523	0.0017412	1	ENSG00000271955	0	ncRNA_intronic	4.83	6	1	0
2	6	rs10168190	rs10184100	A	G	59984273	0.4811	4.48849e-08	0.0095273	0.0017416	0.862747	ENSG00000271955	0	ncRNA_intronic	1.12	7	5	0
2	6	rs10168190	rs2120046	C	T	59987306	0.4344	NA	NA	NA	0.655449	ENSG00000271955	0	ncRNA_intronic	4.67	NA	9	0
2	6	rs12474507	rs12477652	C	T	59987310	0.3598	NA	NA	NA	0.756714	ENSG00000271955	0	ncRNA_intronic	0.937	7	9	0
2	6	rs10168190	rs2165763	G	A	59987410	0.4314	6.18301e-08	0.0094287	0.0017417	0.668716	ENSG00000271955	0	ncRNA_intronic	5.394	6	9	0
2	6	rs12474507	rs12474507	T	C	59988258	0.3559	6.44169e-11	0.011352	0.0017376	1	ENSG00000271955	0	ncRNA_intronic	3.738	7	9	0
2	6	rs10168190	rs10779946	G	T	59989406	0.4235	3.47856e-07	0.0088744	0.0017416	0.625243	ENSG00000271955	0	ncRNA_intronic	8.697	2b	7	0
2	6	rs10168190	rs11125812	C	T	59989621	0.4314	3.89583e-08	0.0095673	0.0017409	0.655048	ENSG00000271955	0	ncRNA_intronic	16.73	7	7	0
2	6	rs10168190	rs10169902	A	T	59990890	0.4304	4.94994e-08	0.0094927	0.0017408	0.652684	ENSG00000271955	0	ncRNA_intronic	13.98	7	5	0
2	6	rs10168190	rs10172985	A	T	59991656	0.4344	5.11446e-08	0.0094838	0.001741	0.6623	ENSG00000271955	0	ncRNA_intronic	2.423	6	5	0
2	6	rs10168190	rs4672313	C	T	59993191	0.4274	7.2644e-08	0.0093741	0.0017409	0.624518	ENSG00000271955	0	ncRNA_intronic	0.954	6	5	0
2	6	rs10168190	rs4672314	T	A	59993257	0.4274	8.25277e-08	0.0093354	0.0017411	0.624518	ENSG00000271955	0	ncRNA_intronic	1.129	6	5	0
2	7	rs4852778	rs7590738	A	G	71525698	0.4443	4.20533e-08	-0.0096177	0.0017544	1	NA	NA	NA	2.74	7	5	1
2	7	rs4852778	rs4314015	T	G	71528309	0.4453	3.93007e-08	-0.0096401	0.0017546	0.995803	NA	NA	NA	2.406	7	5	1
2	7	rs4852778	rs12992283	C	T	71528646	0.4702	NA	NA	NA	0.766507	NA	NA	NA	1.176	6	5	0
2	7	rs4852778	rs7605066	T	C	71529331	0.4463	5.65327e-08	-0.0095347	0.0017561	0.991648	NA	NA	NA	0.337	7	5	1
2	7	rs4852778	rs7609266	C	G	71530558	0.4453	5.57699e-08	-0.0095307	0.0017546	0.995803	NA	NA	NA	0.505	6	5	1
2	7	rs4852778	rs6731420	C	T	71533300	0.4453	4.14859e-08	-0.0096234	0.0017546	0.995803	NA	NA	NA	1.873	7	5	1
2	7	rs4852778	rs4852777	C	G	71534161	0.4254	1.60731e-06	-0.0084345	0.0017581	0.915628	NA	NA	NA	0.307	4	1	1
2	7	rs4852778	rs4470366	A	T	71534617	0.4364	1.74261e-07	-0.0091706	0.0017551	0.901746	NA	NA	NA	7.465	7	5	1
2	7	rs4852778	rs17743264	C	G	71534811	0.4513	3.14702e-06	-0.0081379	0.0017459	0.613777	NA	NA	NA	0.516	6	5	1
2	7	rs4852778	rs4852252	C	T	71539301	0.4553	8.7882e-08	-0.0093804	0.0017533	0.955599	NA	NA	NA	10.72	6	5	1
2	7	rs4852778	rs6546683	T	C	71542781	0.4443	5.23359e-08	-0.0095507	0.0017546	0.991588	ZNF638	16077	intergenic	1.008	6	5	1
2	7	rs4852778	rs6546684	C	T	71542795	0.4443	NA	NA	NA	0.991588	ZNF638	16063	intergenic	1.145	7	5	1
2	7	rs4852778	rs4852778	A	G	71544954	0.4443	3.75146e-08	-0.0096549	0.0017547	1	ZNF638	13904	intergenic	1.119	7	9	1
2	7	rs4852778	rs12464713	T	C	71553752	0.4463	5.56288e-08	-0.0095392	0.001756	0.991648	ZNF638	5106	intergenic	4.68	6	5	1
2	7	rs4852778	rs1861848	C	T	71555356	0.4463	5.75307e-08	-0.0095288	0.001756	0.991648	ZNF638	3502	intergenic	0.416	4	5	1
2	7	rs4852778	rs6744751	T	G	71556167	0.4453	6.20583e-08	-0.0094966	0.0017544	0.995803	ZNF638	2691	intergenic	0.795	7	5	1
2	7	rs4852778	rs2287326	G	T	71559107	0.4453	3.91562e-08	-0.009678	0.0017613	0.995824	ZNF638	0	intronic	18.72	2b	1	1
2	7	rs4852778	rs3771382	C	G	71559445	0.4443	NA	NA	NA	0.991588	ZNF638	0	intronic	8.324	4	1	1
2	7	rs4852778	rs17743415	C	T	71562503	0.4533	1.08468e-07	-0.0093704	0.001764	0.963636	ZNF638	0	intronic	3.022	6	2	1
2	7	rs4852778	rs17692517	G	T	71563549	0.4463	6.51178e-08	-0.009476	0.0017534	0.991648	ZNF638	0	intronic	1.913	7	1	1
2	7	rs4852778	rs3771379	G	T	71566841	0.4463	NA	NA	NA	0.983391	ZNF638	0	intronic	0.3	NA	2	1
2	7	rs4852778	rs1990774	G	A	71568206	0.4463	5.118e-08	-0.0095658	0.0017561	0.991708	ZNF638	0	intronic	2.837	7	2	1
2	7	rs4852778	rs72839781	T	C	71569378	0.4473	NA	NA	NA	0.987552	ZNF638	0	intronic	8.472	7	4	1
2	7	rs4852778	rs200720648	C	A	71570994	0.4483	NA	NA	NA	0.983413	ZNF638	0	intronic	2.685	7	4	0
2	7	rs4852778	rs6746731	G	T	71572917	0.4453	5.12861e-08	-0.0095507	0.0017534	0.995824	ZNF638	0	intronic	2.491	7	4	1
2	7	rs4852778	rs3771376	G	A	71575259	0.4453	5.58985e-08	-0.0095237	0.0017534	0.995824	ZNF638	0	intronic	0.399	NA	4	1
2	7	rs4852778	rs2058899	A	G	71580129	0.4453	5.73324e-08	-0.0095159	0.0017534	0.995824	ZNF638	0	intronic	6.839	1f	2	1
2	7	rs4852778	rs6726122	A	T	71583924	0.4503	NA	NA	NA	0.958364	ZNF638	0	intronic	0.037	6	4	1
2	7	rs4852778	rs56408212	T	C	71584201	0.4453	5.49921e-08	-0.0095285	0.0017533	0.995824	ZNF638	0	intronic	3.686	6	4	1
2	7	rs4852778	rs7568069	A	G	71584485	0.4453	5.92379e-08	-0.0095052	0.0017533	0.995824	ZNF638	0	intronic	3.682	6	4	1
2	7	rs4852778	rs2542509	G	A	71589743	0.335	5.53095e-05	0.0070626	0.0017516	0.617059	ZNF638	0	intronic	0.629	6	3	1
2	7	rs4852778	rs3771374	G	A	71589913	0.4473	5.44377e-08	-0.0095451	0.0017558	0.987552	ZNF638	0	intronic	1.127	NA	3	1
2	7	rs4852778	rs4852254	C	T	71590611	0.4463	7.72325e-08	-0.0094216	0.0017533	0.991648	ZNF638	0	intronic	9.718	5	4	1
2	7	rs4852778	rs4852255	G	C	71590964	0.4463	7.08435e-08	-0.0094488	0.0017533	0.991648	ZNF638	0	intronic	2.43	6	4	1
2	7	rs4852778	rs10445946	T	C	71594534	0.4463	7.37564e-08	-0.0094501	0.0017559	0.991708	ZNF638	0	intronic	0.482	7	4	1
2	7	rs4852778	rs2419076	A	G	71594906	0.4453	5.73456e-08	-0.0095151	0.0017533	0.995824	ZNF638	0	intronic	3.329	7	4	1
2	7	rs4852778	rs6740645	T	C	71596041	0.4453	6.25749e-08	-0.0094879	0.0017533	0.995824	ZNF638	0	intronic	2.308	7	4	1
2	7	rs4852778	rs17693250	G	T	71601434	0.4463	7.49894e-08	-0.009445	0.0017559	0.991708	ZNF638	0	intronic	0.268	1f	4	1
2	7	rs4852778	rs66793870	G	A	71602535	0.4453	6.72048e-08	-0.0094656	0.0017533	0.995824	ZNF638	0	intronic	0.568	7	4	1
2	7	rs4852778	rs4852779	C	A	71604358	0.4463	6.6696e-08	-0.0094681	0.0017534	0.983236	ZNF638	0	intronic	0.174	6	4	1
2	7	rs4852778	rs17749675	C	A	71604466	0.4463	8.31189e-08	-0.0093986	0.0017533	0.991648	ZNF638	0	intronic	2.603	7	4	1
2	7	rs4852778	rs17749725	C	A	71605131	0.4463	8.27752e-08	-0.0093994	0.0017533	0.983297	ZNF638	0	intronic	1.662	6	4	1
2	7	rs4852778	rs17749748	G	T	71605145	0.4463	7.67008e-08	-0.0094234	0.0017532	0.983297	ZNF638	0	intronic	5.085	6	4	1
2	7	rs4852778	rs17693408	A	G	71607539	0.4553	8.27942e-08	-0.0094572	0.0017641	0.955851	ZNF638	0	intronic	5.096	7	4	1
2	7	rs4852778	rs6745907	G	A	71609073	0.4473	6.37529e-08	-0.0094822	0.0017534	0.987488	ZNF638	0	intronic	3.596	7	4	1
2	7	rs4852778	rs67817805	G	A	71613478	0.4483	7.2778e-08	-0.0094899	0.0017625	0.983413	ZNF638	0	intronic	3.577	6	4	1
2	7	rs4852778	rs7557781	G	A	71613914	0.4473	5.90609e-08	-0.0095058	0.0017533	0.987488	ZNF638	0	intronic	8.132	7	4	1
2	7	rs4852778	rs6717013	A	G	71614443	0.3668	2.18675e-05	0.0074508	0.0017552	0.703446	ZNF638	0	intronic	1.675	6	4	1
2	7	rs4852778	rs12478953	C	T	71618599	0.3658	2.36429e-05	-0.0074203	0.0017553	0.708494	ZNF638	0	intronic	4.65	7	4	1
2	7	rs4852778	rs4852780	C	T	71620111	0.4155	1.76726e-07	-0.0091644	0.0017548	0.858419	ZNF638	0	intronic	2.853	7	4	1
2	7	rs4852778	rs6744886	A	G	71621230	0.4483	5.02458e-08	-0.0095713	0.001756	0.983413	ZNF638	0	intronic	0.591	7	4	1
2	7	rs4852778	rs6744784	T	C	71621288	0.337	4.54569e-05	-0.0071626	0.0017565	0.608024	ZNF638	0	intronic	0.278	7	4	1
2	7	rs4852778	rs3771371	T	C	71627539	0.4473	5.33089e-08	-0.0095964	0.001764	0.987552	ZNF638	0	intronic	5.606	NA	4	1
2	7	rs4852778	rs7578166	C	A	71630041	0.4046	1.85909e-07	-0.0091239	0.0017502	0.820351	ZNF638	0	intronic	4.103	6	4	1
2	7	rs4852778	rs4852256	T	A	71631345	0.4473	3.7627e-08	-0.0096465	0.0017533	0.987488	ZNF638	0	intronic	1.87	6	4	1
2	7	rs4852778	rs3732233	C	T	71633275	0.4483	4.49366e-08	-0.0096062	0.001756	0.983413	ZNF638	0	exonic	4.781	NA	4	1
2	7	rs4852778	rs6714975	T	C	71633389	0.4473	4.28647e-08	-0.0096067	0.0017534	0.987488	ZNF638	0	exonic	11.17	5	4	1
2	7	rs4852778	rs12474072	G	A	71636036	0.4453	5.51442e-08	-0.009528	0.0017534	0.987391	ZNF638	0	intronic	1.251	7	4	1
2	7	rs4852778	rs4852782	C	T	71636240	0.4453	5.88166e-08	-0.0095078	0.0017534	0.987391	ZNF638	0	intronic	3.903	6	4	1
2	7	rs4852778	rs1986522	G	A	71645257	0.4473	5.17726e-08	-0.0095618	0.001756	0.987488	ZNF638	0	intronic	7.128	NA	2	1
2	7	rs4852778	rs4852783	A	G	71645828	0.4473	4.98196e-08	-0.0095737	0.001756	0.987488	ZNF638	0	intronic	2.4	6	4	1
2	7	rs4852778	rs4438512	A	G	71645946	0.4473	4.96821e-08	-0.0095747	0.001756	0.987488	ZNF638	0	intronic	0.078	6	4	1
2	7	rs4852778	rs2419079	A	T	71646017	0.4463	4.77639e-08	-0.0095726	0.0017534	0.991623	ZNF638	0	intronic	8.221	6	4	1
2	7	rs4852778	rs4852785	A	C	71647809	0.4463	5.91834e-08	-0.0095058	0.0017534	0.991623	ZNF638	0	intronic	3.32	5	2	1
2	7	rs4852778	rs7593986	G	C	71651597	0.4523	1.11353e-07	0.0092985	0.001752	0.967287	ZNF638	0	intronic	0.081	5	2	1
2	7	rs4852778	rs12613800	A	T	71651939	0.4473	8.62184e-08	0.0094011	0.001756	0.987488	ZNF638	0	intronic	7.206	6	4	1
2	7	rs4852778	rs12713749	G	A	71652473	0.4473	8.97429e-08	0.0093885	0.001756	0.987488	ZNF638	0	intronic	1.778	5	4	1
2	7	rs4852778	rs6546692	A	T	71658017	0.4543	6.83282e-08	0.0095144	0.0017634	0.95961	ZNF638	0	intronic	10.8	7	4	1
2	7	rs4852778	rs10173072	T	C	71660804	0.4463	6.54034e-08	0.0094739	0.0017533	0.991623	ZNF638	0	intronic	3.812	6	4	1
2	7	rs4852778	rs4643565	T	C	71661422	0.4463	7.67715e-08	0.0094234	0.0017533	0.991623	ZNF638	0	intronic	8.15	6	4	1
2	7	rs4852778	rs7562587	A	C	71662826	0.4473	5.55648e-08	-0.0095395	0.001756	0.987488	ZNF638	0	downstream	5.504	5	4	1
2	7	rs4852778	rs7569062	A	G	71669722	0.336	4.77859e-05	-0.0071214	0.0017514	0.611894	ZNF638	7531	intergenic	2.553	5	4	1
2	7	rs4852778	rs4332945	G	T	71674476	0.4463	6.1546e-08	-0.0095067	0.0017558	0.983236	DYSF	6376	intergenic	2.447	5	5	1
2	7	rs4852778	rs4241246	A	C	71676366	0.4414	5.10035e-08	-0.0095654	0.0017558	0.937561	DYSF	4486	intergenic	5.698	7	5	1
2	7	rs4852778	rs4852257	G	T	71678520	0.4443	1.20226e-07	-0.0092835	0.0017538	0.941409	DYSF	2332	intergenic	5.815	4	1	1
2	8	rs13027159	rs317243	G	A	76239791	0.2744	NA	NA	NA	0.888319	SUCLA2P2	93351	intergenic	1.319	6	5	0
2	8	rs13027159	rs386124	C	T	76240635	0.2654	8.57038e-08	-0.0092551	0.0017284	0.882511	SUCLA2P2	92507	intergenic	4.433	NA	5	0
2	8	rs13027159	rs3860465	G	C	76242053	0.2217	3.34811e-08	0.009549	0.0017292	0.762884	SUCLA2P2	91089	intergenic	1.336	7	5	0
2	8	rs13027159	rs11901961	A	C	76245656	0.2247	2.59358e-08	0.0097655	0.0017542	0.764825	SUCLA2P2	87486	intergenic	4.713	6	5	0
2	8	rs13027159	rs17749719	C	A	76245774	0.2227	2.80221e-08	0.009604	0.0017294	0.775472	SUCLA2P2	87368	intergenic	2.067	7	5	0
2	8	rs13027159	rs17012055	G	A	76246432	0.2256	3.05141e-08	0.0097172	0.0017544	0.768565	SUCLA2P2	86710	intergenic	3.686	3a	7	0
2	8	rs13027159	rs67627854	G	T	76246645	0.2256	3.12033e-08	0.0097154	0.0017554	0.768565	SUCLA2P2	86497	intergenic	5.17	6	7	0
2	8	rs13027159	rs34096809	G	A	76250415	0.2227	3.10957e-08	0.0095712	0.0017291	0.775472	SUCLA2P2	82727	intergenic	4.15	7	9	0
2	8	rs13027159	rs13396626	T	C	76251349	0.2256	2.82618e-08	0.0097338	0.0017532	0.768565	SUCLA2P2	81793	intergenic	2.376	7	9	0
2	8	rs13027159	rs2099784	G	A	76252103	0.2256	3.25012e-08	0.0096907	0.0017532	0.768565	SUCLA2P2	81039	intergenic	11.04	NA	9	0
2	8	rs13027159	rs72820785	C	G	76252953	0.2227	2.92483e-08	0.0095897	0.0017291	0.775472	SUCLA2P2	80189	intergenic	0.002	6	9	0
2	8	rs13027159	rs34127116	T	C	76255306	0.2237	3.2419e-08	0.009559	0.0017292	0.770282	SUCLA2P2	77836	intergenic	0.319	7	9	0
2	8	rs13027159	rs1120455	T	A	76257067	0.2256	NA	NA	NA	0.768565	SUCLA2P2	76075	intergenic	0.305	6	9	0
2	8	rs13027159	rs1583929	T	A	76257068	0.2256	NA	NA	NA	0.768565	SUCLA2P2	76074	intergenic	3.45	6	9	0
2	8	rs13027159	rs2017612	A	C	76260305	0.2237	2.98057e-08	0.0095846	0.0017292	0.770282	SUCLA2P2	72837	intergenic	3.127	NA	9	0
2	8	rs13027159	rs72820790	C	A	76260716	0.2256	5.18084e-08	0.0094152	0.0017291	0.759407	SUCLA2P2	72426	intergenic	1.657	6	9	0
2	8	rs13027159	rs17750080	C	T	76262871	0.2247	4.52898e-08	0.0094573	0.0017293	0.764825	SUCLA2P2	70271	intergenic	8.575	7	9	0
2	8	rs13027159	rs11897811	T	C	76267139	0.2266	2.85299e-08	0.0097532	0.0017572	0.772715	SUCLA2P2	66003	intergenic	2.043	7	14	0
2	8	rs13027159	rs2010897	A	T	76268843	0.2266	1.72465e-08	0.0098836	0.0017531	0.772715	SUCLA2P2	64299	intergenic	3.706	6	9	0
2	8	rs13027159	rs1808872	A	G	76268949	0.2266	3.37054e-08	0.0097036	0.0017575	0.772715	SUCLA2P2	64193	intergenic	2.439	NA	9	0
2	8	rs13027159	rs13409158	G	A	76272825	0.2266	NA	NA	NA	0.763153	SUCLA2P2	60317	intergenic	1.888	6	9	0
2	8	rs13027159	rs13006831	C	T	76276861	0.2247	3.4578e-08	0.0095387	0.0017291	0.774018	SUCLA2P2	56281	intergenic	8.957	7	9	0
2	8	rs13027159	rs13007136	T	A	76280257	0.2276	3.91381e-08	0.009506	0.00173	0.776121	SUCLA2P2	52885	intergenic	3.058	6	9	0
2	8	rs13027159	rs13015060	A	G	76281363	0.2247	2.91273e-08	0.0095906	0.001729	0.774018	SUCLA2P2	51779	intergenic	2.037	7	9	0
2	8	rs13027159	rs6713168	A	G	76282306	0.2276	2.60196e-08	0.0097603	0.0017534	0.767338	SUCLA2P2	50836	intergenic	1.601	6	14	0
2	8	rs13027159	rs13013977	A	G	76284323	0.2276	3.7325e-08	0.0096494	0.0017534	0.767338	SUCLA2P2	48819	intergenic	0.439	7	9	0
2	8	rs13027159	rs2033996	A	T	76284826	0.2276	3.23817e-08	0.009693	0.0017534	0.767338	SUCLA2P2	48316	intergenic	4.88	7	9	0
2	8	rs13027159	rs7590192	A	G	76285203	0.2276	3.3358e-08	0.0096841	0.0017534	0.767338	SUCLA2P2	47939	intergenic	4.251	6	9	0
2	8	rs13027159	rs13027154	G	A	76286326	0.2247	3.11243e-08	0.0095729	0.0017295	0.774018	SUCLA2P2	46816	intergenic	8.739	7	9	0
2	8	rs13027159	rs13034330	G	A	76287352	0.2336	7.50412e-08	0.0093136	0.0017316	0.719636	SUCLA2P2	45790	intergenic	14.74	7	9	0
2	8	rs13027159	rs13033451	C	T	76290867	0.2247	1.34091e-08	0.0098224	0.001729	0.774018	SUCLA2P2	42275	intergenic	2.468	6	9	0
2	8	rs13027159	rs563036663	T	C	76291187	0.1899	NA	NA	NA	0.645464	SUCLA2P2	41955	intergenic	1.605	NA	9	0
2	8	rs13027159	rs72822707	C	G	76297115	0.2227	1.27879e-08	0.009836	0.0017289	0.77578	SUCLA2P2	36027	intergenic	1.579	5	9	0
2	8	rs13027159	rs115487049	A	T	76297343	0.2266	NA	NA	NA	0.772715	SUCLA2P2	35799	intergenic	4.072	6	9	0
2	8	rs13027159	rs13405742	C	G	76299458	0.2266	1.51705e-08	0.0099327	0.001755	0.772715	SUCLA2P2	33684	intergenic	0.211	5	9	0
2	8	rs13027159	rs6751236	C	A	76300145	0.2266	1.5209e-08	0.009932	0.001755	0.772715	SUCLA2P2	32997	intergenic	0.943	6	9	0
2	8	rs13027159	rs6723128	T	G	76300206	0.2276	1.47911e-08	0.0099307	0.0017533	0.767338	SUCLA2P2	32936	intergenic	0.813	6	9	0
2	8	rs13027159	rs13409722	T	G	76300757	0.2266	1.48491e-08	0.0099293	0.0017532	0.772715	SUCLA2P2	32385	intergenic	0.056	7	7	0
2	8	rs13027159	rs6547046	C	T	76303398	0.2266	1.42069e-08	0.0099529	0.0017551	0.772715	SUCLA2P2	29744	intergenic	4.086	7	5	0
2	8	rs13027159	rs12987316	T	C	76305424	0.2266	1.35457e-08	0.0099572	0.0017533	0.772715	SUCLA2P2	27718	intergenic	3.089	7	5	0
2	8	rs13027159	rs17750689	G	A	76306375	0.2256	1.10382e-08	0.009879	0.0017289	0.777778	SUCLA2P2	26767	intergenic	20.6	7	5	0
2	8	rs13027159	rs17750877	G	C	76309964	0.2247	9.1791e-09	0.0099332	0.0017289	0.783266	SUCLA2P2	23178	intergenic	9.094	7	5	0
2	8	rs13027159	rs35475961	A	G	76310280	0.2247	8.9043e-09	0.0099418	0.0017289	0.783266	SUCLA2P2	22862	intergenic	2.358	6	5	0
2	8	rs13027159	rs10205242	A	G	76310296	0.2276	8.71967e-09	0.010098	0.0017549	0.776487	SUCLA2P2	22846	intergenic	7.657	6	5	0
2	8	rs13027159	rs12477289	T	C	76310517	0.1789	NA	NA	NA	0.605572	SUCLA2P2	22625	intergenic	7.149	NA	5	0
2	8	rs13027159	rs13007525	A	G	76321025	0.2256	NA	NA	NA	0.777778	SUCLA2P2	12117	intergenic	0.512	7	15	0
2	8	rs13027159	rs13007007	C	A	76321047	0.2247	NA	NA	NA	0.783266	SUCLA2P2	12095	intergenic	0.53	7	15	0
2	8	rs13027159	rs9751999	G	T	76322329	0.2276	NA	NA	NA	0.776487	SUCLA2P2	10813	intergenic	5.264	7	9	0
2	8	rs13027159	rs9750968	G	C	76322420	0.2276	6.88494e-09	0.010175	0.0017561	0.776487	SUCLA2P2	10722	intergenic	1.621	7	9	0
2	8	rs13027159	rs12996790	C	A	76324494	0.2286	6.49083e-09	0.010033	0.0017288	0.762001	SUCLA2P2	8648	intergenic	2.767	6	9	0
2	8	rs13027159	rs12987001	C	T	76326239	0.2247	7.34176e-09	0.0099978	0.0017288	0.783266	SUCLA2P2	6903	intergenic	0.164	7	9	0
2	8	rs13027159	rs35727414	G	A	76328464	0.2247	7.5753e-09	0.0099885	0.0017288	0.783266	SUCLA2P2	4678	intergenic	1.389	6	9	0
2	8	rs13027159	rs6715402	A	G	76328608	0.2276	7.2778e-09	0.010148	0.0017543	0.776487	SUCLA2P2	4534	intergenic	5.081	7	9	0
2	8	rs13027159	rs71418795	T	C	76328829	0.2247	7.48342e-09	0.0099919	0.0017287	0.783266	SUCLA2P2	4313	intergenic	1.81	7	9	0
2	8	rs13027159	rs6743989	G	A	76328947	0.2276	6.81554e-09	0.010167	0.0017543	0.776487	SUCLA2P2	4195	intergenic	3.462	7	9	0
2	8	rs13027159	rs12713862	C	A	76329480	0.2276	7.33331e-09	0.01016	0.0017568	0.776487	SUCLA2P2	3662	intergenic	0.745	7	9	0
2	8	rs13027159	rs6752103	T	A	76330933	0.2276	7.00648e-09	0.010152	0.0017531	0.776487	SUCLA2P2	2209	intergenic	0.987	6	9	0
2	8	rs13027159	rs35861585	G	C	76334047	0.2247	1.4067e-08	0.0098068	0.0017288	0.783266	SUCLA2P2	0	ncRNA_exonic	3.389	7	5	0
2	8	rs13027159	rs71418796	A	T	76334392	0.2247	1.44012e-08	0.0098	0.0017288	0.783266	SUCLA2P2	0	ncRNA_exonic	4.895	5	5	0
2	8	rs13027159	rs13030138	T	C	76334588	0.2276	1.35052e-08	0.0099579	0.0017532	0.776487	SUCLA2P2	0	upstream	3.141	5	5	0
2	8	rs13027159	rs12713863	G	A	76334796	0.2276	1.26911e-08	0.0099765	0.0017532	0.776487	SUCLA2P2	0	upstream	1.592	6	5	0
2	8	rs13027159	rs10188424	T	C	76335351	0.2276	1.26445e-08	0.0099874	0.001755	0.776487	SUCLA2P2	0	upstream	3.167	7	5	0
2	8	rs13027159	rs17700671	G	A	76339780	0.2247	1.41286e-08	0.0098053	0.0017287	0.783266	SUCLA2P2	5330	intergenic	3.768	7	5	0
2	8	rs13027159	rs71418798	A	G	76340405	0.2256	1.24022e-08	0.0098669	0.0017328	0.787046	SUCLA2P2	5955	intergenic	0.172	7	5	0
2	8	rs13027159	rs10496201	G	T	76343260	0.2247	1.82894e-08	0.0097349	0.0017298	0.783266	SUCLA2P2	8810	intergenic	5.434	6	9	0
2	8	rs13027159	rs11690678	T	A	76351418	0.2247	1.81217e-08	0.009732	0.0017289	0.783266	SUCLA2P2	16968	intergenic	1.507	6	14	0
2	8	rs13027159	rs34205641	A	T	76353563	0.2256	1.57507e-08	0.0097752	0.0017291	0.787046	SUCLA2P2	19113	intergenic	5.518	6	9	0
2	8	rs13027159	rs35328078	C	T	76354035	0.2256	1.60177e-08	0.0097706	0.0017292	0.787046	SUCLA2P2	19585	intergenic	11.75	6	5	0
2	8	rs13027159	rs12997508	C	G	76354679	0.2256	2.26673e-08	0.0096701	0.0017298	0.787046	SUCLA2P2	20229	intergenic	3.781	7	5	0
2	8	rs13027159	rs374279899	C	T	76355442	0.2256	NA	NA	NA	0.787046	SUCLA2P2	20992	intergenic	4.094	7	5	0
2	8	rs13027159	rs1608587	G	A	76356721	0.2256	1.11301e-08	0.0098779	0.0017291	0.787046	SUCLA2P2	22271	intergenic	0.017	7	7	0
2	8	rs13027159	rs68152182	G	A	76357302	0.2256	1.14762e-08	0.0098687	0.0017291	0.787046	SUCLA2P2	22852	intergenic	3.053	3a	5	0
2	8	rs13027159	rs744235	G	A	76357903	0.2256	1.13632e-08	0.0098766	0.00173	0.787046	SUCLA2P2	23453	intergenic	1.137	NA	7	0
2	8	rs13027159	rs200564863	A	G	76360187	0.2256	NA	NA	NA	0.787046	SUCLA2P2	25737	intergenic	1.069	6	15	0
2	8	rs13027159	rs13009289	T	A	76363083	0.2256	1.18413e-08	0.0098663	0.0017303	0.787046	SUCLA2P2	28633	intergenic	8.628	7	9	0
2	8	rs13027159	rs13010209	G	A	76363486	0.2256	1.20948e-08	0.0098522	0.0017289	0.787046	SUCLA2P2	29036	intergenic	7.414	6	9	0
2	8	rs13027159	rs56042228	T	C	76363928	0.2256	1.19922e-08	0.0098559	0.0017291	0.787046	SUCLA2P2	29478	intergenic	6.235	7	9	0
2	8	rs13027159	rs71420904	T	C	76364051	0.2256	1.18005e-08	0.0098606	0.0017291	0.787046	SUCLA2P2	29601	intergenic	6.325	6	7	0
2	8	rs13027159	rs13007345	A	T	76364921	0.2256	1.21199e-08	0.0098577	0.00173	0.787046	SUCLA2P2	30471	intergenic	12.27	6	9	0
2	8	rs13027159	rs113781666	A	G	76365497	0.2276	1.28825e-08	0.009835	0.0017292	0.785689	SUCLA2P2	31047	intergenic	0.069	7	9	0
2	8	rs13027159	rs12987556	A	C	76365716	0.2256	1.25893e-08	0.0098452	0.0017297	0.787046	SUCLA2P2	31266	intergenic	3.466	6	9	0
2	8	rs13027159	rs34951587	G	A	76367509	0.2256	1.33137e-08	0.0098299	0.00173	0.787046	SUCLA2P2	33059	intergenic	1.528	7	9	0
2	8	rs13027159	rs1975400	T	C	76368328	0.2256	1.27732e-08	0.0098364	0.0017289	0.787046	SUCLA2P2	33878	intergenic	1.562	NA	9	0
2	8	rs13027159	rs34905192	T	G	76369761	0.2256	1.23965e-08	0.0098452	0.001729	0.787046	SUCLA2P2	35311	intergenic	0.57	7	9	0
2	8	rs13027159	rs10496202	G	T	76370861	0.2266	1.27409e-08	0.0098369	0.0017289	0.791134	SUCLA2P2	36411	intergenic	3.405	6	9	0
2	8	rs13027159	rs72822774	T	A	76371231	0.2266	1.30798e-08	0.0098288	0.0017289	0.791134	SUCLA2P2	36781	intergenic	6.359	7	9	0
2	8	rs13027159	rs12993003	G	A	76373326	0.2266	1.30647e-08	0.0098309	0.0017292	0.791134	SUCLA2P2	38876	intergenic	1.998	7	9	0
2	8	rs13027159	rs11676113	C	T	76375756	0.2266	1.21283e-08	0.0098614	0.0017307	0.791134	SUCLA2P2	41306	intergenic	0.813	7	9	0
2	8	rs13027159	rs11682975	G	A	76376895	0.2266	1.26911e-08	0.009844	0.00173	0.791134	SUCLA2P2	42445	intergenic	4.426	7	9	0
2	8	rs13027159	rs35964749	G	A	76379167	0.2276	1.15531e-08	0.0098658	0.0017289	0.785689	SUCLA2P2	44717	intergenic	3.249	6	9	0
2	8	rs13027159	rs17701527	T	C	76379915	0.2276	1.08168e-08	0.0099001	0.0017315	0.785689	SUCLA2P2	45465	intergenic	1.75	7	9	0
2	8	rs13027159	rs17752567	C	G	76381075	0.2416	1.11096e-08	0.0099207	0.0017365	0.777558	SUCLA2P2	46625	intergenic	0.791	7	9	0
2	8	rs13027159	rs7419684	G	C	76381296	0.3926	NA	NA	NA	0.613815	SUCLA2P2	46846	intergenic	0.367	7	9	0
2	8	rs13027159	rs17012240	T	C	76381448	0.3459	9.04066e-07	-0.0085427	0.0017393	0.717003	SUCLA2P2	46998	intergenic	1.021	7	9	0
2	8	rs13027159	rs11889360	A	G	76381620	0.3459	1.03181e-06	-0.0084979	0.0017394	0.717003	SUCLA2P2	47170	intergenic	4.795	7	9	0
2	8	rs13027159	rs1996975	A	G	76382113	0.3449	9.57635e-07	-0.0085445	0.0017437	0.719996	SUCLA2P2	47663	intergenic	4.224	NA	7	0
2	8	rs13027159	rs1996974	G	A	76382249	0.3449	9.46891e-07	-0.0085481	0.0017436	0.719996	SUCLA2P2	47799	intergenic	6.957	NA	7	0
2	8	rs13027159	rs17040450	T	C	76383468	0.2316	6.418e-09	0.010087	0.0017374	0.810965	SUCLA2P2	49018	intergenic	0.556	7	14	0
2	8	rs13027159	rs13027159	A	G	76383589	0.2724	5.62341e-09	-0.010097	0.0017325	1	SUCLA2P2	49139	intergenic	8.923	7	14	0
2	8	rs13027159	rs17012249	G	C	76384145	0.2316	6.10942e-09	0.010092	0.0017358	0.810965	SUCLA2P2	49695	intergenic	2.867	7	14	0
2	8	rs13027159	rs34236297	A	T	76386797	0.2326	6.11928e-09	0.010115	0.0017399	0.805608	SUCLA2P2	52347	intergenic	2.637	6	5	0
2	8	rs13027159	rs35787624	G	A	76389335	0.2326	6.89604e-09	0.010079	0.0017398	0.805608	SUCLA2P2	54885	intergenic	2.892	6	7	0
2	8	rs13027159	rs34007713	T	C	76391302	0.2316	6.74217e-09	0.010088	0.0017402	0.801728	SUCLA2P2	56852	intergenic	11.16	5	9	0
2	8	rs13027159	rs34743837	A	C	76394682	0.2366	5.64937e-09	0.010147	0.0017413	0.785026	SUCLA2P2	60232	intergenic	2.264	6	5	0
2	8	rs13027159	rs13002280	G	A	76395829	0.2366	6.6558e-09	0.010099	0.0017414	0.785026	SUCLA2P2	61379	intergenic	10.97	7	5	0
2	8	rs13027159	rs11678895	A	C	76396834	0.2366	8.52315e-09	0.01003	0.001742	0.785026	SUCLA2P2	62384	intergenic	9.607	6	5	0
2	8	rs13027159	rs67496128	T	A	76397508	0.2386	8.34834e-09	0.010052	0.0017447	0.77477	SUCLA2P2	63058	intergenic	0.94	5	5	0
2	8	rs13027159	rs7572341	T	G	76400220	0.2366	8.48594e-09	0.010023	0.0017405	0.785026	SUCLA2P2	65770	intergenic	1.175	6	7	0
2	8	rs13027159	rs11673856	G	A	76400441	0.2366	8.88996e-09	0.010009	0.0017404	0.785026	SUCLA2P2	65991	intergenic	11.47	5	7	0
2	8	rs13027159	rs13035134	C	T	76403648	0.2376	1.57543e-08	0.0097728	0.0017287	0.753037	SUCLA2P2	69198	intergenic	3.224	6	9	0
2	8	rs35066740	rs34908694	C	T	76404044	0.2346	7.15979e-08	0.0093575	0.001737	0.763664	SUCLA2P2	69594	intergenic	13.35	6	9	0
2	8	rs35066740	rs35853212	G	A	76404741	0.2177	2.45641e-07	0.0089082	0.001726	0.856346	SUCLA2P2	70291	intergenic	4.448	7	9	0
2	8	rs35066740	rs35103010	T	A	76405127	0.2157	2.54624e-07	0.0088838	0.0017235	0.846443	SUCLA2P2	70677	intergenic	6.153	7	9	0
2	8	rs35066740	rs66609617	C	T	76405967	0.2177	2.58523e-07	0.0088907	0.0017258	0.856346	SUCLA2P2	71517	intergenic	15.37	5	9	0
2	8	rs35066740	rs66625537	C	T	76406262	0.2177	2.39276e-07	0.0089158	0.0017259	0.856346	SUCLA2P2	71812	intergenic	1.457	7	9	0
2	8	rs35066740	rs34847153	C	T	76408841	0.2177	2.59777e-07	0.0088704	0.0017222	0.856346	SUCLA2P2	74391	intergenic	0.727	7	9	0
2	8	rs35066740	rs11679728	G	A	76409529	0.2177	2.5781e-07	0.0088917	0.0017259	0.856346	SUCLA2P2	75079	intergenic	0.7	6	7	0
2	8	rs35066740	rs34389781	G	A	76410327	0.2177	1.25228e-07	0.009179	0.0017365	0.856346	ENSG00000228209	74833	intergenic	14.44	6	9	0
2	8	rs35066740	rs34533269	T	G	76410330	0.2177	1.20698e-07	0.0091374	0.0017265	0.856346	ENSG00000228209	74830	intergenic	11.37	7	9	0
2	8	rs35066740	rs13021865	T	G	76411032	0.2177	NA	NA	NA	0.856346	ENSG00000228209	74128	intergenic	0.139	6	9	0
2	8	rs35066740	rs35516376	A	G	76411833	0.2177	1.51985e-07	0.0090632	0.0017262	0.856346	ENSG00000228209	73327	intergenic	0.714	7	9	0
2	8	rs35066740	rs35690432	T	A	76412510	0.2177	1.56387e-07	0.009072	0.0017296	0.856346	ENSG00000228209	72650	intergenic	1.5	7	9	0
2	8	rs35066740	rs2177500	T	G	76413305	0.2157	4.80618e-08	0.0094231	0.0017263	0.846443	ENSG00000228209	71855	intergenic	3.739	NA	14	0
2	8	rs35066740	rs2177499	T	A	76413306	0.2157	1.21563e-07	0.0091322	0.0017259	0.846443	ENSG00000228209	71854	intergenic	4.598	6	14	0
2	8	rs35066740	rs1533986	G	A	76413692	0.2157	1.49486e-07	0.0090702	0.0017266	0.846443	ENSG00000228209	71468	intergenic	2.607	NA	14	0
2	8	rs35066740	rs12996043	G	A	76419240	0.2147	1.85652e-07	0.0089981	0.001726	0.851141	ENSG00000228209	65920	intergenic	3.551	7	7	0
2	8	rs35066740	rs7565818	T	C	76423364	0.2137	1.40799e-07	0.0091062	0.0017298	0.856586	ENSG00000228209	61796	intergenic	0.481	6	5	0
2	8	rs35066740	rs1316629	C	T	76423946	0.326	2.06776e-07	-0.0091206	0.0017562	0.602142	ENSG00000228209	61214	intergenic	3.704	NA	5	0
2	8	rs35066740	rs997292	C	G	76429544	0.2306	1.43979e-08	0.0097948	0.0017279	0.946241	ENSG00000228209	55616	intergenic	1.396	6	5	0
2	8	rs35066740	rs72824609	G	T	76430325	0.2326	NA	NA	NA	0.935794	ENSG00000228209	54835	intergenic	0.391	3b	5	0
2	8	rs35066740	rs1916870	G	T	76430941	0.2306	2.33776e-08	0.009622	0.0017228	0.946241	ENSG00000228209	54219	intergenic	5.139	6	5	0
2	8	rs35066740	rs11886716	G	A	76432642	0.2873	6.6819e-06	0.0079618	0.0017678	0.713578	ENSG00000228209	52518	intergenic	2.276	7	5	0
2	8	rs35066740	rs2860731	C	T	76435772	0.3231	2.02302e-07	-0.0091214	0.001755	0.610153	ENSG00000228209	49388	intergenic	2.611	6	5	0
2	8	rs35066740	rs6725523	A	G	76436984	0.2863	6.13197e-06	0.0079921	0.0017675	0.716971	ENSG00000228209	48176	intergenic	0.429	7	5	0
2	8	rs35066740	rs6761061	G	A	76438298	0.2316	1.06512e-08	0.0098808	0.0017274	0.962329	ENSG00000228209	46862	intergenic	3.265	6	5	0
2	8	rs35066740	rs35731561	G	A	76441866	0.2336	1.1471e-08	0.0098383	0.0017237	0.962523	ENSG00000228209	43294	intergenic	1.494	6	15	0
2	8	rs35066740	rs59141066	A	G	76444520	0.3241	7.81988e-08	-0.009412	0.0017523	0.609885	ENSG00000228209	40640	intergenic	1.391	7	15	0
2	8	rs35066740	rs6547057	G	A	76451219	0.2992	6.74062e-06	0.0079356	0.0017628	0.682758	ENSG00000228209	33941	intergenic	7.301	7	9	0
2	8	rs35066740	rs7584954	T	A	76451595	0.2942	8.78618e-06	0.0078397	0.0017637	0.704849	ENSG00000228209	33565	intergenic	0.545	6	9	0
2	8	rs35066740	rs4853203	C	T	76452080	0.2942	8.52315e-06	0.0078409	0.0017613	0.711148	ENSG00000228209	33080	intergenic	2.5	7	9	0
2	8	rs35066740	rs11891956	A	G	76453762	0.2913	2.77077e-06	0.0082577	0.0017618	0.729499	ENSG00000228209	31398	intergenic	1.907	6	9	0
2	8	rs35066740	rs13027106	C	T	76455168	0.2336	3.80014e-09	0.010189	0.001729	0.973274	ENSG00000228209	29992	intergenic	2.066	7	14	0
2	8	rs35066740	rs13001881	G	A	76455812	0.2326	4.48126e-09	0.010138	0.0017284	0.978568	ENSG00000228209	29348	intergenic	3.59	6	14	0
2	8	rs35066740	rs9798065	A	G	76456388	0.2913	NA	NA	NA	0.679498	ENSG00000228209	28772	intergenic	1.806	6	14	0
2	8	rs35066740	rs9798066	A	G	76456389	0.2913	NA	NA	NA	0.679498	ENSG00000228209	28771	intergenic	1.435	6	14	0
2	8	rs35066740	rs35066740	T	G	76459530	0.2286	3.68129e-09	0.010193	0.0017281	1	ENSG00000228209	25630	intergenic	3.973	7	14	0
2	8	rs35066740	rs11895769	T	C	76461245	0.2903	NA	NA	NA	0.730888	ENSG00000228209	23915	intergenic	1.772	7	14	0
2	8	rs35066740	rs74740791	A	T	76461944	0.325	NA	NA	NA	0.62748	ENSG00000228209	23216	intergenic	0.27	6	14	0
2	8	rs35066740	rs2140570	T	G	76462817	0.2893	1.94895e-06	0.0083666	0.0017582	0.734266	ENSG00000228209	22343	intergenic	0.347	7	14	0
2	8	rs35066740	rs35430959	C	T	76465288	0.2336	6.1546e-09	0.010032	0.0017259	0.973274	ENSG00000228209	19872	intergenic	11.97	7	9	0
2	8	rs35066740	rs2030667	G	A	76466867	0.2952	1.8737e-06	0.0084014	0.0017625	0.711985	ENSG00000228209	18293	intergenic	3.53	NA	9	0
2	8	rs35066740	rs12464211	A	G	76473288	0.326	4.32514e-08	-0.0096009	0.0017529	0.619584	ENSG00000228209	11872	intergenic	2.108	6	9	0
2	8	rs35066740	rs10168901	G	C	76479233	0.2296	5.92652e-09	0.010101	0.0017359	0.983616	ENSG00000228209	5927	intergenic	0.911	6	5	0
2	8	rs35066740	rs17753876	C	A	76483430	0.2823	1.9893e-06	0.0082339	0.0017318	0.663998	ENSG00000228209	1730	intergenic	1.422	7	5	0
2	8	rs35066740	rs12993149	G	T	76485610	0.2744	1.21619e-06	0.0084031	0.0017315	0.683638	ENSG00000228209	0	ncRNA_exonic	11.76	7	5	0
2	8	rs35066740	rs7609022	G	T	76487107	0.2455	NA	NA	NA	0.784568	ENSG00000271356	0	downstream	0.652	7	5	0
2	8	rs35066740	rs17754447	C	T	76495893	0.2465	2.21055e-05	0.0073674	0.0017366	0.770627	ENSG00000271356	7106	intergenic	0.22	4	2	0
2	8	rs35066740	rs67527138	G	A	76500663	0.2575	4.48952e-05	0.0070499	0.0017276	0.72142	ENSG00000271356	11876	intergenic	4.172	6	5	0
2	8	rs35066740	rs13012492	G	T	76500871	0.2575	4.47404e-05	0.0070513	0.0017276	0.72142	ENSG00000271356	12084	intergenic	6.128	6	5	0
2	8	rs35066740	rs1568985	G	A	76503012	0.2565	5.00035e-05	0.0070063	0.0017276	0.725432	ENSG00000271356	14225	intergenic	4.264	NA	5	0
2	8	rs35066740	rs1524209	G	A	76503762	0.2565	4.2658e-05	0.0070628	0.0017257	0.725432	ENSG00000271356	14975	intergenic	12.31	7	5	0
2	8	rs35066740	rs17754897	A	G	76509864	0.2555	6.03671e-05	0.0069557	0.001734	0.72947	ENSG00000271356	21077	intergenic	15.97	5	5	0
2	8	rs35066740	rs1526619	G	A	76517005	0.2575	3.65763e-05	0.0071299	0.0017271	0.72142	ENSG00000271356	28218	intergenic	5.523	NA	5	0
2	8	rs35066740	rs34546729	C	A	76524663	0.2644	0.000119152	0.0066731	0.0017342	0.695816	ENSG00000271356	35876	intergenic	1.808	6	5	0
2	9	rs266067	rs13032215	G	A	103973750	0.3201	2.10475e-05	0.0074585	0.0017535	0.661886	ENSG00000227623	81154	intergenic	4.997	6	5	0
2	9	rs1433309	rs6752675	A	G	104056769	0.4563	9.07821e-11	0.011335	0.0017488	0.791038	ENSG00000236596	53930	intergenic	1.653	6	9	0
2	9	rs1433309	rs1368546	C	T	104057364	0.4861	4.00221e-09	0.010256	0.0017429	0.992623	ENSG00000236596	53335	intergenic	1.446	6	9	0
2	9	rs1433309	rs2217683	A	G	104058510	0.4563	8.12831e-11	0.011386	0.0017522	0.791038	ENSG00000236596	52189	intergenic	1.491	7	9	0
2	9	rs1433309	rs1433309	A	G	104059283	0.4841	5.67414e-09	0.010155	0.001743	1	ENSG00000236596	51416	intergenic	3.041	7	7	0
2	9	rs1433309	rs4851649	T	G	104059441	0.4543	5.33335e-11	0.011497	0.0017521	0.785195	ENSG00000236596	51258	intergenic	0.276	6	7	0
2	9	rs1433309	rs12622015	G	A	104059758	0.4563	8.10961e-11	0.011387	0.0017522	0.791038	ENSG00000236596	50941	intergenic	2.643	7	7	0
2	9	rs1433309	rs7562738	A	G	104060568	0.4841	7.59626e-09	0.010069	0.0017429	1	ENSG00000236596	50131	intergenic	2.816	7	7	0
2	9	rs1433309	rs1368547	C	T	104060788	0.4831	7.15814e-09	0.010087	0.0017429	0.996297	ENSG00000236596	49911	intergenic	2.158	5	7	0
2	9	rs1433309	rs13031874	T	A	104061378	0.4563	8.72971e-11	0.011368	0.0017522	0.791038	ENSG00000236596	49321	intergenic	0.054	7	7	0
2	9	rs1433309	rs266063	C	T	104063865	0.4841	5.65718e-09	0.010174	0.0017462	0.992579	ENSG00000236596	46834	intergenic	1.407	5	5	0
2	9	rs1433309	rs1368549	T	G	104064726	0.4573	9.90832e-11	0.011319	0.0017499	0.78663	ENSG00000236596	45973	intergenic	0.071	7	5	0
2	9	rs266067	rs266064	C	T	104067175	0.2674	2.79705e-06	0.0082068	0.0017516	0.75636	ENSG00000236596	43524	intergenic	2.594	7	7	0
2	9	rs1433309	rs266065	A	G	104067744	0.4841	6.36063e-09	0.010142	0.0017464	0.992579	ENSG00000236596	42955	intergenic	4.484	6	7	0
2	9	rs1433309	rs266066	G	A	104068344	0.4831	6.59022e-09	0.010111	0.0017428	0.996297	ENSG00000236596	42355	intergenic	0.1	7	9	0
2	9	rs1433309	rs1040124	G	A	104069183	0.4592	NA	NA	NA	0.904486	ENSG00000236596	41516	intergenic	0.368	6	9	0
2	9	rs266067	rs266067	A	C	104069784	0.329	2.69277e-09	0.010444	0.0017554	1	ENSG00000236596	40915	intergenic	4.279	7	9	0
2	9	rs1433309	rs266068	C	G	104069913	0.4573	8.27942e-11	0.011369	0.0017503	0.78663	ENSG00000236596	40786	intergenic	0.016	6	9	0
2	9	rs1433309	rs2138108	A	G	104070010	0.4573	1.07177e-10	0.011302	0.0017504	0.78663	ENSG00000236596	40689	intergenic	2.226	7	9	0
2	9	rs1433309	rs2138109	G	A	104070012	0.4573	1.12564e-10	0.011289	0.0017504	0.78663	ENSG00000236596	40687	intergenic	3.445	7	9	0
2	9	rs1433309	rs817224	T	A	104070047	0.4573	1.00786e-10	0.011328	0.001752	0.78663	ENSG00000236596	40652	intergenic	2.405	7	9	0
2	9	rs1433309	rs13032356	T	C	104070408	0.4573	7.90679e-11	0.011392	0.0017519	0.78663	ENSG00000236596	40291	intergenic	2.124	6	9	0
2	9	rs1433309	rs11685036	C	G	104071129	0.4573	8.05378e-11	0.011388	0.001752	0.78663	ENSG00000236596	39570	intergenic	1.382	7	9	0
2	9	rs1433309	rs2672847	G	A	104071536	0.4573	8.07235e-11	0.011387	0.001752	0.78663	ENSG00000236596	39163	intergenic	1.923	6	9	0
2	9	rs1433309	rs2672852	T	C	104072110	0.4622	4.2462e-11	0.01156	0.0017527	0.772141	ENSG00000236596	38589	intergenic	10.29	7	9	0
2	9	rs264979	rs817225	A	G	104073034	0.4364	5.57186e-12	0.012067	0.0017513	0.735424	ENSG00000236596	37665	intergenic	0.95	7	9	0
2	9	rs264979	rs266069	C	A	104076420	0.4374	4.2658e-12	0.012143	0.0017526	0.731673	ENSG00000236596	34279	intergenic	2.913	7	9	0
2	9	rs1433309	rs266070	G	A	104076655	0.499	2.65889e-09	0.010383	0.0017445	0.848112	ENSG00000236596	34044	intergenic	0.358	6	9	0
2	9	rs264979	rs266071	C	G	104077211	0.4374	4.13048e-12	0.012154	0.0017531	0.731673	ENSG00000236596	33488	intergenic	0.331	7	9	0
2	9	rs264979	rs266072	A	G	104077388	0.4374	6.53131e-12	0.012028	0.0017514	0.731673	ENSG00000236596	33311	intergenic	2.18	6	9	0
2	9	rs264979	rs266073	T	C	104077400	0.4374	6.10942e-12	0.012045	0.0017514	0.731673	ENSG00000236596	33299	intergenic	0.904	6	9	0
2	9	rs264979	rs1368550	C	T	104078655	0.4374	4.9204e-12	0.012108	0.0017527	0.731673	ENSG00000236596	32044	intergenic	0.688	4	9	0
2	9	rs264979	rs1368551	G	A	104078658	0.4374	4.40555e-12	0.012126	0.0017513	0.731673	ENSG00000236596	32041	intergenic	2.017	4	9	0
2	9	rs1433309	rs266074	C	A	104079435	0.498	2.36592e-09	0.01044	0.0017486	0.84466	ENSG00000236596	31264	intergenic	0.639	4	1	0
2	9	rs1433309	rs2672851	G	C	104079968	0.498	2.35288e-09	0.010442	0.0017486	0.84466	ENSG00000236596	30731	intergenic	2.408	5	1	0
2	9	rs12712181	rs2569963	T	C	104083756	0.4364	2.24905e-08	0.0097251	0.0017392	0.842755	ENSG00000236596	26943	intergenic	0.961	6	9	0
2	9	rs264979	rs266061	A	G	104084698	0.4364	4.54988e-12	0.01213	0.0017531	0.735424	ENSG00000236596	26001	intergenic	2.245	6	9	0
2	9	rs1433309	rs266060	A	G	104084861	0.497	2.42047e-09	0.010434	0.0017486	0.8486	ENSG00000236596	25838	intergenic	0.835	NA	9	0
2	9	rs1433309	rs266059	G	A	104084908	0.498	2.43893e-09	0.010431	0.0017486	0.84466	ENSG00000236596	25791	intergenic	1.277	NA	9	0
2	9	rs264979	rs266058	T	C	104086428	0.4344	3.02691e-12	0.012227	0.0017526	0.727295	ENSG00000236596	24271	intergenic	1.102	NA	9	0
2	9	rs1433309	rs266057	T	G	104087611	0.497	2.65889e-09	0.010405	0.0017483	0.8486	ENSG00000236596	23088	intergenic	0.326	7	15	0
2	9	rs1433309	rs266047	A	G	104088751	0.498	2.73968e-09	0.010395	0.001748	0.84466	ENSG00000236596	21948	intergenic	1.036	6	15	0
2	9	rs264979	rs266048	G	A	104088908	0.4374	5.04661e-12	0.012099	0.0017523	0.731673	ENSG00000236596	21791	intergenic	1.315	7	15	0
2	9	rs264979	rs266049	A	G	104089193	0.4374	5.12861e-12	0.012096	0.0017524	0.731673	ENSG00000236596	21506	intergenic	0.983	7	9	0
2	9	rs12712181	rs266050	C	T	104089243	0.4384	3.0137e-08	0.0096372	0.0017393	0.848465	ENSG00000236596	21456	intergenic	1.297	6	9	0
2	9	rs1433309	rs266051	G	T	104089765	0.499	2.55859e-09	0.010416	0.0017483	0.84126	ENSG00000236596	20934	intergenic	1.174	6	9	0
2	9	rs1433309	rs266052	C	A	104089774	0.499	2.55859e-09	0.010416	0.0017483	0.84126	ENSG00000236596	20925	intergenic	0.378	6	9	0
2	9	rs264979	rs1093422	T	G	104089943	0.4374	NA	NA	NA	0.731673	ENSG00000236596	20756	intergenic	0.187	7	9	0
2	9	rs264979	rs266053	C	T	104090213	0.4354	3.19154e-12	0.012215	0.0017526	0.723523	ENSG00000236596	20486	intergenic	0.729	6	9	0
2	9	rs1433309	rs166461	C	G	104091166	0.493	NA	NA	NA	0.819444	ENSG00000236596	19533	intergenic	0.757	7	9	0
2	9	rs264979	rs197451	T	C	104092326	0.4384	5.14044e-12	0.012098	0.0017528	0.727937	ENSG00000236596	18373	intergenic	1.319	6	9	0
2	9	rs264979	rs171952	G	A	104092943	0.4354	6.09537e-12	0.012053	0.0017525	0.724581	ENSG00000236596	17756	intergenic	2.843	6	9	0
2	9	rs264979	rs2257063	T	C	104092954	0.4354	5.74116e-12	0.012068	0.0017525	0.724581	ENSG00000236596	17745	intergenic	4.607	7	9	0
2	9	rs1433309	rs2569970	T	C	104092956	0.496	3.08745e-09	0.010356	0.0017472	0.838319	ENSG00000236596	17743	intergenic	0.772	7	9	0
2	9	rs264979	rs266055	A	C	104093800	0.4374	5.49541e-12	0.012078	0.0017524	0.731673	ENSG00000236596	16899	intergenic	2.595	7	7	0
2	9	rs264979	rs817223	C	T	104094008	0.4354	3.62243e-12	0.012184	0.0017527	0.723523	ENSG00000236596	16691	intergenic	7.79	6	7	0
2	9	rs1433309	rs266056	G	C	104094981	0.499	3.17322e-09	0.010347	0.001747	0.840733	ENSG00000236596	15718	intergenic	0.079	5	9	0
2	9	rs264979	rs11675977	A	G	104095893	0.4374	5.86138e-12	0.012062	0.0017524	0.731673	ENSG00000236596	14806	intergenic	2.443	7	9	0
2	9	rs264979	rs1836054	C	T	104095980	0.4374	6.06736e-12	0.012053	0.0017523	0.731673	ENSG00000236596	14719	intergenic	11.68	6	9	0
2	9	rs264979	rs11677228	A	G	104096243	0.4374	5.97035e-12	0.012057	0.0017523	0.731673	ENSG00000236596	14456	intergenic	6.963	6	9	0
2	9	rs264979	rs11677232	A	G	104096271	0.4374	5.95662e-12	0.012057	0.0017523	0.731673	ENSG00000236596	14428	intergenic	1.358	7	9	0
2	9	rs264979	rs1579547	C	T	104097914	0.4374	5.8479e-12	-0.012062	0.0017524	0.731673	ENSG00000236596	12785	intergenic	4.212	6	9	0
2	9	rs1433309	rs1579548	A	G	104098057	0.493	3.31894e-08	-0.0096279	0.001743	0.819444	ENSG00000236596	12642	intergenic	2.447	7	9	0
2	9	rs1433309	rs6756149	T	C	104099833	0.499	1.9602e-09	-0.010465	0.0017438	0.827801	ENSG00000236596	10866	intergenic	0.444	7	9	0
2	9	rs1433309	rs6759192	T	C	104099985	0.499	1.99388e-09	-0.01046	0.0017438	0.827801	ENSG00000236596	10714	intergenic	3.12	6	9	0
2	9	rs1433309	rs7562265	A	C	104102766	0.493	NA	NA	NA	0.800651	ENSG00000236596	7933	intergenic	0.093	7	7	0
2	9	rs1433309	rs1515000	A	C	104104650	0.5	2.03892e-09	-0.010453	0.0017437	0.831691	ENSG00000236596	6049	intergenic	2.675	5	9	0
2	9	rs12712181	rs62151026	G	C	104105385	0.4423	2.34369e-08	-0.0097048	0.0017378	0.862307	ENSG00000236596	5314	intergenic	0.431	7	9	0
2	9	rs264979	rs13395153	C	T	104105609	0.4384	3.19154e-12	-0.012218	0.0017531	0.750409	ENSG00000236596	5090	intergenic	0.811	3a	9	0
2	9	rs1433309	rs62151028	C	T	104106067	0.5	2.00124e-09	-0.010459	0.0017437	0.831691	ENSG00000236596	4632	intergenic	0.284	6	9	0
2	9	rs264979	rs7570677	G	A	104106404	0.4384	3.31131e-12	-0.012195	0.0017511	0.750409	ENSG00000236596	4295	intergenic	1.702	6	9	0
2	9	rs264979	rs4380263	A	G	104107978	0.4384	3.21366e-12	-0.012204	0.0017514	0.750409	ENSG00000236596	2721	intergenic	4.993	6	9	0
2	9	rs266067	rs3929544	C	G	104108513	0.2684	2.231e-06	-0.0082983	0.0017539	0.727732	ENSG00000236596	2186	intergenic	0.541	7	9	0
2	9	rs264979	rs1040123	G	A	104109681	0.4384	3.17687e-12	-0.012205	0.0017511	0.750409	ENSG00000236596	1018	intergenic	2.996	7	9	0
2	9	rs1433309	rs17336349	G	A	104110587	0.5	1.93419e-09	-0.010468	0.0017437	0.831691	ENSG00000236596	0	upstream	1.839	6	9	0
2	9	rs266067	rs13021501	A	G	104111595	0.2485	9.58959e-06	0.0077287	0.0017461	0.67593	ENSG00000236596	0	ncRNA_exonic	1.268	6	9	0
2	9	rs1433309	rs7576297	T	C	104111867	0.5	NA	NA	NA	0.831691	ENSG00000236596	0	ncRNA_intronic	2.965	7	9	0
2	9	rs1433309	rs17336391	T	A	104113377	0.492	2.60615e-08	-0.0096975	0.0017422	0.803551	ENSG00000236596	1077	intergenic	0.831	6	9	0
2	9	rs264979	rs6761396	A	G	104113458	0.4384	5.05825e-12	-0.012086	0.0017506	0.750409	ENSG00000236596	1158	intergenic	3.946	5	9	0
2	9	rs264979	rs6751705	G	T	104113702	0.4384	4.2658e-12	-0.012132	0.0017511	0.750409	ENSG00000236596	1402	intergenic	2.297	7	9	0
2	9	rs264979	rs6543211	G	A	104113747	0.4384	4.27563e-12	-0.012132	0.0017511	0.750409	ENSG00000236596	1447	intergenic	1.853	6	9	0
2	9	rs1433309	rs6543213	G	A	104115429	0.5	2.65766e-09	-0.010377	0.0017435	0.831691	ENSG00000236596	3129	intergenic	0.967	7	9	0
2	9	rs1433309	rs7371212	A	G	104116083	0.4881	5.27959e-09	-0.010199	0.001747	0.794268	ENSG00000236596	3783	intergenic	0.18	6	9	0
2	9	rs264979	rs6543214	C	A	104116970	0.4374	1.05196e-11	-0.0119	0.0017502	0.739505	ENSG00000236596	4670	intergenic	1.064	6	9	0
2	9	rs264979	rs1514999	C	G	104117668	0.4344	5.92925e-12	-0.012069	0.0017538	0.735128	ENSG00000236596	5368	intergenic	0.242	6	9	0
2	9	rs1433309	rs6760407	T	G	104118594	0.499	1.32923e-09	-0.010571	0.0017432	0.828231	ENSG00000236596	6294	intergenic	0.051	7	9	0
2	9	rs264979	rs6543215	C	T	104118605	0.4354	3.0903e-12	-0.012225	0.0017531	0.739187	ENSG00000236596	6305	intergenic	0.141	7	9	0
2	9	rs1433309	rs6732785	T	C	104118607	0.4861	2.4649e-09	-0.010425	0.0017479	0.788371	ENSG00000236596	6307	intergenic	0.092	7	9	0
2	9	rs264979	rs1514998	G	A	104119652	0.4364	6.88652e-12	-0.012027	0.0017532	0.743257	ENSG00000236596	7352	intergenic	4.638	NA	9	0
2	9	rs264979	rs4369880	G	A	104119885	0.4364	7.01455e-12	-0.012023	0.0017532	0.743257	ENSG00000236596	7585	intergenic	0.971	7	9	0
2	9	rs1433309	rs7593587	A	C	104121555	0.4881	5.22878e-09	-0.010208	0.0017479	0.794268	ENSG00000236596	9255	intergenic	2.57	7	9	0
2	9	rs1433309	rs7596779	T	C	104122137	0.492	2.6218e-08	-0.0096951	0.0017421	0.803551	ENSG00000236596	9837	intergenic	3.054	6	9	0
2	9	rs264979	rs1399547	C	G	104122451	0.4364	6.87068e-12	-0.012027	0.0017531	0.743257	ENSG00000236596	10151	intergenic	0.205	7	9	0
2	9	rs264979	rs7573399	A	G	104123234	0.4364	7.09578e-12	-0.012017	0.0017529	0.743257	ENSG00000236596	10934	intergenic	0.72	5	9	0
2	9	rs1433309	rs4851652	C	G	104123611	0.4881	NA	NA	NA	0.794268	ENSG00000236596	11311	intergenic	1.772	5	9	0
2	9	rs264979	rs17336454	T	G	104124146	0.4364	6.98232e-12	-0.012024	0.0017531	0.743257	ENSG00000236596	11846	intergenic	0.368	7	9	0
2	9	rs1433309	rs17414675	G	A	104124252	0.492	2.76121e-08	-0.0096793	0.0017421	0.803551	ENSG00000236596	11952	intergenic	4.131	7	9	0
2	9	rs264979	rs7584767	G	C	104124363	0.4364	7.03072e-12	-0.012022	0.0017532	0.743257	ENSG00000236596	12063	intergenic	0.44	7	9	0
2	9	rs264979	rs4283441	T	C	104125396	0.4364	7.09578e-12	-0.012019	0.0017531	0.743257	ENSG00000236596	13096	intergenic	2.297	7	9	0
2	9	rs1433309	rs7605491	C	T	104125850	0.492	2.67547e-08	-0.0096889	0.0017421	0.803551	ENSG00000236596	13550	intergenic	3.848	7	9	0
2	9	rs1433309	rs4613308	C	T	104126383	0.4881	5.30762e-09	-0.010203	0.0017479	0.794268	ENSG00000236596	14083	intergenic	1.526	6	9	0
2	9	rs1433309	rs4533489	A	G	104126586	0.4881	5.3765e-09	-0.0102	0.0017479	0.794268	ENSG00000236596	14286	intergenic	5.919	6	9	0
2	9	rs1433309	rs1901478	C	T	104126904	0.4881	5.3592e-09	-0.0102	0.0017479	0.794268	ENSG00000236596	14604	intergenic	2.348	NA	9	0
2	9	rs264979	rs1901477	G	A	104126983	0.4364	7.01455e-12	-0.012023	0.0017533	0.743257	ENSG00000236596	14683	intergenic	2.07	NA	9	0
2	9	rs1433309	rs1451981	T	C	104127109	0.492	2.59418e-08	-0.0096972	0.0017419	0.803551	ENSG00000236596	14809	intergenic	2.654	NA	9	0
2	9	rs1433309	rs1451980	A	T	104128108	0.4891	5.31618e-09	-0.010203	0.0017479	0.790252	ENSG00000236596	15808	intergenic	3.442	7	9	0
2	9	rs1433309	rs1376839	A	T	104129146	0.4881	5.31618e-09	-0.010203	0.0017479	0.794268	ENSG00000221849	14932	intergenic	1.099	6	9	0
2	9	rs264979	rs7564071	C	A	104129328	0.4364	7.14496e-12	-0.012018	0.0017532	0.743257	ENSG00000221849	14750	intergenic	1.175	6	9	0
2	9	rs1433309	rs1451979	A	G	104129357	0.4881	5.32599e-09	-0.010202	0.0017479	0.794268	ENSG00000221849	14721	intergenic	4.155	NA	9	0
2	9	rs1433309	rs1451978	T	C	104129424	0.4881	5.32599e-09	-0.010202	0.0017479	0.794268	ENSG00000221849	14654	intergenic	4.271	NA	9	0
2	9	rs1433309	rs10174287	T	A	104130003	0.4881	5.32476e-09	-0.010202	0.0017479	0.794268	ENSG00000221849	14075	intergenic	0.616	7	9	0
2	9	rs1433309	rs10168971	A	C	104132182	0.4881	5.38518e-09	-0.0102	0.0017481	0.794268	ENSG00000221849	11896	intergenic	11.58	7	9	0
2	9	rs1433309	rs1349574	T	C	104132805	0.5	3.73766e-09	-0.010279	0.0017435	0.831691	ENSG00000221849	11273	intergenic	0.093	NA	9	0
2	9	rs264979	rs1839893	T	C	104133885	0.4364	6.9024e-12	-0.012027	0.0017533	0.743257	ENSG00000221849	10193	intergenic	2.323	NA	9	0
2	9	rs264979	rs1839892	C	T	104133966	0.4364	7.14496e-12	-0.012018	0.0017533	0.743257	ENSG00000221849	10112	intergenic	11.91	NA	9	0
2	9	rs264979	rs11894548	G	C	104134223	0.4364	7.16143e-12	-0.012018	0.0017534	0.743257	ENSG00000221849	9855	intergenic	0.179	7	9	0
2	9	rs264979	rs9679319	T	G	104134432	0.4364	NA	NA	NA	0.743257	ENSG00000221849	9646	intergenic	3.261	7	9	0
2	9	rs1433309	rs13425787	A	G	104135952	0.4881	NA	NA	NA	0.794268	ENSG00000221849	8126	intergenic	3.011	7	9	0
2	9	rs12712181	rs74263702	A	T	104136031	0.4761	NA	NA	NA	0.742932	ENSG00000221849	8047	intergenic	7.102	6	9	0
2	9	rs1433309	rs10210222	C	T	104136397	0.4881	5.36537e-09	-0.010201	0.0017481	0.794268	ENSG00000221849	7681	intergenic	7.19	7	9	0
2	9	rs1433309	rs4851653	A	G	104136581	0.4881	5.17011e-09	-0.010212	0.0017481	0.794268	ENSG00000221849	7497	intergenic	8.759	6	9	0
2	9	rs1433309	rs4851028	A	T	104136682	0.5	2.6767e-09	-0.010375	0.0017435	0.831691	ENSG00000221849	7396	intergenic	5.186	6	9	0
2	9	rs264979	rs7567562	A	G	104137154	0.4364	6.91831e-12	-0.012027	0.0017533	0.743257	ENSG00000221849	6924	intergenic	1.191	7	9	0
2	9	rs1433309	rs6707686	G	A	104138351	0.4881	5.18442e-09	-0.010211	0.0017481	0.794268	ENSG00000221849	5727	intergenic	1.772	6	9	0
2	9	rs1433309	rs6707968	G	A	104138496	0.4881	5.15347e-09	-0.010213	0.0017481	0.794268	ENSG00000221849	5582	intergenic	2.626	6	9	0
2	9	rs1433309	rs58378462	A	G	104138639	0.4861	3.46976e-09	-0.010326	0.0017479	0.787658	ENSG00000221849	5439	intergenic	0.468	7	9	0
2	9	rs1433309	rs7572064	A	G	104138823	0.4881	5.10035e-09	-0.010216	0.0017481	0.794268	ENSG00000221849	5255	intergenic	2.532	7	9	0
2	9	rs264979	rs1427352	G	C	104139615	0.4364	8.66962e-12	-0.01197	0.0017532	0.743257	ENSG00000221849	4463	intergenic	1.786	7	9	0
2	9	rs264979	rs2068081	C	T	104141171	0.4344	4.20727e-12	-0.012149	0.001753	0.735128	ENSG00000221849	2907	intergenic	0.372	NA	7	0
2	9	rs1433309	rs7557106	T	C	104141247	0.4881	5.13452e-09	-0.010214	0.001748	0.794268	ENSG00000221849	2831	intergenic	0.801	7	7	0
2	9	rs264979	rs7582785	T	G	104141293	0.4364	6.9024e-12	-0.012027	0.0017533	0.743257	ENSG00000221849	2785	intergenic	0.384	6	7	0
2	9	rs1433309	rs7557217	G	C	104141332	0.5	2.74536e-09	-0.010368	0.0017435	0.831691	ENSG00000221849	2746	intergenic	1.859	7	7	0
2	9	rs1433309	rs2068482	G	C	104141414	0.4881	5.10387e-09	-0.010216	0.0017481	0.794268	ENSG00000221849	2664	intergenic	0.944	7	7	0
2	9	rs1433309	rs1022298	G	T	104142548	0.4881	5.10035e-09	-0.010216	0.0017481	0.794268	ENSG00000221849	1530	intergenic	9.421	NA	7	0
2	9	rs1433309	rs1022297	G	C	104142610	0.4881	4.69245e-09	-0.01024	0.0017481	0.794268	ENSG00000221849	1468	intergenic	1	5	5	0
2	9	rs264979	rs7574952	G	A	104142699	0.4364	6.77642e-12	-0.012032	0.0017533	0.743257	ENSG00000221849	1379	intergenic	1.645	6	5	0
2	9	rs1433309	rs56016615	G	A	104142880	0.4871	NA	NA	NA	0.791669	ENSG00000221849	1198	intergenic	1.499	4	5	0
2	9	rs1433309	rs1451983	T	C	104143886	0.4881	5.08628e-09	-0.010217	0.0017481	0.794268	ENSG00000221849	0	upstream	3.611	NA	5	0
2	9	rs264979	rs1451982	G	T	104143998	0.4364	6.76083e-12	-0.012033	0.0017533	0.743257	ENSG00000221849	0	upstream	2.862	NA	5	0
2	9	rs1433309	rs17414806	T	C	104144902	0.4881	5.09565e-09	-0.010216	0.0017481	0.794268	ENSG00000221849	0	ncRNA_exonic	4.749	5	5	0
2	9	rs264979	rs6723416	G	A	104147753	0.4364	5.68853e-12	-0.012069	0.0017522	0.743257	ENSG00000221849	2034	intergenic	3.379	5	7	0
2	9	rs1433309	rs55713926	G	C	104148570	0.4881	4.14381e-09	-0.01029	0.0017504	0.794268	ENSG00000221849	2851	intergenic	5.657	7	9	0
2	9	rs1433309	rs12466519	T	C	104149169	0.492	2.4649e-08	-0.0097138	0.0017421	0.803551	ENSG00000221849	3450	intergenic	9.453	7	9	0
2	9	rs1433309	rs13392420	A	C	104149288	0.4881	5.07458e-09	-0.010218	0.0017481	0.794268	ENSG00000221849	3569	intergenic	2.073	6	9	0
2	9	rs12712181	rs1597745	G	A	104149470	0.4414	2.46263e-08	-0.0096882	0.0017375	0.866492	ENSG00000221849	3751	intergenic	2.195	NA	9	0
2	9	rs1433309	rs1597744	G	A	104149476	0.4881	4.81726e-09	-0.010233	0.0017481	0.794268	ENSG00000221849	3757	intergenic	1.337	NA	9	0
2	9	rs264979	rs1597743	G	A	104149830	0.4364	6.98232e-12	-0.012018	0.0017523	0.743257	ENSG00000221849	4111	intergenic	1.047	NA	9	0
2	9	rs264979	rs1597742	G	T	104150233	0.4374	6.98232e-12	-0.012017	0.0017523	0.733797	ENSG00000221849	4514	intergenic	1.782	NA	9	0
2	9	rs1433309	rs6720941	T	C	104150791	0.5	2.78869e-09	-0.010363	0.0017435	0.831691	ENSG00000221849	5072	intergenic	1.064	7	9	0
2	9	rs264979	rs6738833	C	T	104150891	0.4364	6.85488e-12	-0.012023	0.0017525	0.743257	ENSG00000221849	5172	intergenic	1.022	6	9	0
2	9	rs1433309	rs7600378	A	G	104151304	0.492	2.58048e-08	-0.0097003	0.0017422	0.803551	ENSG00000221849	5585	intergenic	0.773	6	9	0
2	9	rs264979	rs60744245	T	C	104151984	0.4364	NA	NA	NA	0.743257	ENSG00000221849	6265	intergenic	0.658	6	9	0
2	9	rs1433309	rs184573978	T	C	104151988	0.4881	NA	NA	NA	0.794268	ENSG00000221849	6269	intergenic	0.708	6	9	0
2	9	rs264979	rs7595711	G	A	104153212	0.4344	6.16595e-12	-0.012059	0.0017538	0.735128	ENSG00000221849	7493	intergenic	1.106	6	9	0
2	9	rs1433309	rs10199507	T	A	104153276	0.4881	5.26502e-09	-0.010207	0.0017481	0.794268	ENSG00000221849	7557	intergenic	1.279	7	9	0
2	9	rs264979	rs1597741	G	T	104153362	0.4364	6.93426e-12	-0.012027	0.0017533	0.743257	ENSG00000221849	7643	intergenic	2.759	NA	9	0
2	9	rs1433309	rs1584706	G	A	104153996	0.4881	5.32967e-09	-0.010203	0.0017481	0.794268	ENSG00000221849	8277	intergenic	1.329	NA	9	0
2	9	rs1433309	rs10173184	T	C	104154456	0.4881	5.80898e-09	-0.010178	0.0017481	0.794268	ENSG00000221849	8737	intergenic	8.377	6	9	0
2	9	rs1433309	rs6736873	G	T	104155277	0.4871	5.98963e-09	-0.010169	0.0017481	0.790957	ENSG00000221849	9558	intergenic	11.66	6	9	0
2	9	rs264979	rs6734144	G	A	104155545	0.4344	6.13762e-12	-0.012059	0.0017536	0.735128	ENSG00000221849	9826	intergenic	7.777	6	9	0
2	9	rs264979	rs10191724	C	T	104155913	0.4364	7.36207e-12	-0.01201	0.0017531	0.743257	ENSG00000221849	10194	intergenic	1.647	7	9	0
2	9	rs264979	rs11123960	G	A	104156821	0.4364	7.55092e-12	-0.012004	0.0017531	0.743257	ENSG00000221849	11102	intergenic	3.666	6	9	0
2	9	rs1433309	rs11123961	A	G	104156925	0.4881	6.42244e-09	-0.010148	0.001748	0.794268	ENSG00000221849	11206	intergenic	2.554	6	9	0
2	9	rs1433309	rs11123962	G	T	104157011	0.4901	3.04439e-08	-0.0096455	0.0017414	0.796001	ENSG00000221849	11292	intergenic	8.259	6	9	0
2	9	rs264979	rs11123963	C	T	104157067	0.4364	7.60326e-12	-0.012002	0.0017531	0.743257	ENSG00000221849	11348	intergenic	0.541	7	9	0
2	9	rs1433309	rs6727302	A	C	104157299	0.499	2.82488e-09	-0.01038	0.001747	0.820439	ENSG00000221849	11580	intergenic	3.901	7	9	0
2	9	rs1433309	rs6742125	G	A	104157507	0.4881	6.29071e-09	-0.010166	0.00175	0.794268	ENSG00000221849	11788	intergenic	7.905	7	9	0
2	9	rs1433309	rs10186090	G	C	104158003	0.4881	6.62522e-09	-0.01014	0.0017483	0.794268	ENSG00000221849	12284	intergenic	1.167	7	9	0
2	9	rs1433309	rs11900028	C	T	104158242	0.4891	6.53582e-09	-0.010143	0.001748	0.790967	ENSG00000221849	12523	intergenic	3.042	6	9	0
2	9	rs1433309	rs11893460	T	C	104158394	0.4881	6.60998e-09	-0.010141	0.0017482	0.794268	ENSG00000221849	12675	intergenic	6.242	7	9	0
2	9	rs264979	rs2198234	T	G	104159202	0.4195	7.63836e-12	-0.011997	0.0017526	0.788822	ENSG00000221849	13483	intergenic	0.551	NA	9	0
2	9	rs264979	rs4851029	G	T	104159785	0.4215	9.84011e-12	-0.01193	0.0017521	0.796605	ENSG00000221849	14066	intergenic	0.452	6	9	0
2	9	rs264979	rs4851030	G	A	104160261	0.4404	NA	NA	NA	0.879199	ENSG00000221849	14542	intergenic	2.604	7	9	0
2	9	rs264979	rs10168817	A	G	104160383	0.4463	1.37088e-12	-0.012397	0.0017493	0.872445	ENSG00000221849	14664	intergenic	1.768	7	9	0
2	9	rs264979	rs60705333	A	G	104160497	0.4851	2.34099e-08	-0.0097329	0.0017427	0.748443	ENSG00000221849	14778	intergenic	2.993	7	9	0
2	9	rs264979	rs1451975	A	G	104160826	0.4891	9.41673e-08	-0.0093003	0.0017424	0.759199	ENSG00000221849	15107	intergenic	2.477	NA	9	0
2	9	rs264979	rs4851655	A	G	104162375	0.4811	9.65384e-09	-0.010001	0.0017433	0.780576	ENSG00000221849	16656	intergenic	1.674	6	9	0
2	9	rs264979	rs4851656	A	T	104162463	0.4811	9.6984e-09	-0.0099994	0.0017433	0.780576	ENSG00000221849	16744	intergenic	6.486	7	9	0
2	9	rs264979	rs4851657	C	T	104162842	0.4811	9.68947e-09	-0.0099997	0.0017433	0.780576	ENSG00000221849	17123	intergenic	7.119	6	9	0
2	9	rs264979	rs6721892	A	G	104163187	0.4195	5.50808e-12	-0.012071	0.0017515	0.904888	ENSG00000221849	17468	intergenic	2.66	6	9	0
2	9	rs264979	rs6722293	C	G	104163560	0.4811	9.6917e-09	-0.0099996	0.0017433	0.780576	ENSG00000221849	17841	intergenic	0.402	7	9	0
2	9	rs264979	rs1983305	C	T	104164439	0.4205	5.48277e-12	-0.012067	0.0017507	0.900743	ENSG00000221849	18720	intergenic	0.813	NA	9	0
2	9	rs264979	rs4851031	G	A	104164950	0.4195	5.48277e-12	-0.012071	0.0017513	0.904888	ENSG00000221849	19231	intergenic	2.11	7	9	0
2	9	rs264979	rs2167542	G	A	104165751	0.4165	3.62243e-12	-0.012172	0.001751	0.893429	ENSG00000221849	20032	intergenic	2.58	NA	9	0
2	9	rs264979	rs12465553	A	G	104166182	0.4811	1.03086e-08	-0.0099802	0.001743	0.780576	ENSG00000221849	20463	intergenic	1.396	6	9	0
2	9	rs264979	rs13389342	C	G	104166330	0.4811	9.74092e-09	-0.0099982	0.0017433	0.780576	ENSG00000221849	20611	intergenic	0.146	7	9	0
2	9	rs264979	rs13415620	T	C	104166430	0.4811	9.47982e-09	-0.010004	0.0017429	0.780576	ENSG00000221849	20711	intergenic	0.902	6	9	0
2	9	rs264979	rs6712904	A	G	104166500	0.4811	9.85145e-09	-0.0099943	0.0017432	0.780576	ENSG00000221849	20781	intergenic	0.109	7	9	0
2	9	rs264979	rs6742718	G	C	104166800	0.4811	9.72747e-09	-0.0099982	0.0017432	0.780576	ENSG00000221849	21081	intergenic	0.098	6	9	0
2	9	rs264979	rs11899332	T	C	104167879	0.4811	9.63607e-09	-0.010001	0.0017432	0.780576	ENSG00000221849	22160	intergenic	8.918	7	9	0
2	9	rs264979	rs4851659	A	G	104168736	0.4811	9.8787e-09	-0.0099929	0.0017431	0.780576	ENSG00000221849	23017	intergenic	2.936	6	9	0
2	9	rs264979	rs10173461	G	A	104170019	0.4811	1.03062e-08	-0.0099812	0.0017432	0.780576	ENSG00000221849	24300	intergenic	1.642	7	9	0
2	9	rs264979	rs10184356	A	G	104170265	0.4811	9.68947e-09	-0.0099993	0.0017432	0.780576	ENSG00000221849	24546	intergenic	1.426	7	9	0
2	9	rs264979	rs12466543	G	A	104170556	0.4811	9.68947e-09	-0.0099993	0.0017432	0.780576	ENSG00000221849	24837	intergenic	2.823	7	9	0
2	9	rs264979	rs13382396	T	C	104171172	0.4811	9.8787e-09	-0.0099929	0.0017431	0.780576	ENSG00000221849	25453	intergenic	7.807	7	9	0
2	9	rs264979	rs6720153	G	A	104171464	0.4811	9.89008e-09	-0.0099933	0.0017432	0.780576	ENSG00000221849	25745	intergenic	9.302	7	9	0
2	9	rs264979	rs6720582	G	A	104171783	0.4811	9.91973e-09	-0.0099917	0.0017431	0.780576	ENSG00000221849	26064	intergenic	1.969	7	9	0
2	9	rs264979	rs6708871	T	C	104172144	0.4811	1.01719e-08	-0.0099849	0.0017432	0.780576	ENSG00000221849	26425	intergenic	18.2	6	9	0
2	9	rs264979	rs1073892	T	C	104172374	0.4811	1.033e-08	-0.0099798	0.0017431	0.780576	ENSG00000221849	26655	intergenic	3.821	NA	9	0
2	9	rs264979	rs2084812	C	T	104172815	0.4811	9.93116e-09	-0.0099913	0.0017431	0.780576	ENSG00000221849	27096	intergenic	1.765	NA	9	0
2	9	rs264979	rs4599141	T	A	104173280	0.4811	9.93345e-09	-0.0099913	0.0017431	0.780576	ENSG00000221849	27561	intergenic	4.188	6	9	0
2	9	rs264979	rs1451974	T	C	104173664	0.4205	5.80764e-12	-0.012052	0.0017507	0.900743	ENSG00000221849	27945	intergenic	0.581	NA	9	0
2	9	rs264979	rs13424904	A	C	104173982	0.4811	9.90376e-09	-0.0099929	0.0017432	0.780576	ENSG00000221849	28263	intergenic	2.667	5	9	0
2	9	rs264979	rs6753094	T	C	104174316	0.4811	9.90376e-09	-0.009993	0.0017432	0.780576	ENSG00000221849	28597	intergenic	0.121	7	9	0
2	9	rs264979	rs6713948	C	T	104174496	0.4811	9.77462e-09	-0.0099961	0.0017431	0.780576	ENSG00000221849	28777	intergenic	2.294	6	9	0
2	9	rs264979	rs7568612	G	T	104175323	0.4811	9.90376e-09	-0.0099929	0.0017432	0.780576	ENSG00000221849	29604	intergenic	2.249	7	9	0
2	9	rs264979	rs7577997	C	G	104175422	0.4205	5.70164e-12	-0.012057	0.0017507	0.900743	ENSG00000221849	29703	intergenic	0.202	6	9	0
2	9	rs264979	rs1567959	A	G	104175913	0.4811	9.90376e-09	-0.009993	0.0017432	0.780576	ENSG00000221849	30194	intergenic	0.905	NA	9	0
2	9	rs264979	rs6725608	C	T	104177085	0.4811	9.86279e-09	-0.0099942	0.0017432	0.780576	ENSG00000221849	31366	intergenic	0.226	6	9	0
2	9	rs264979	rs13398567	T	A	104177586	0.4811	9.86279e-09	-0.0099942	0.0017432	0.780576	ENSG00000221849	31867	intergenic	9.459	6	9	0
2	9	rs264979	rs6708478	T	C	104177804	0.4811	9.89236e-09	-0.0099937	0.0017433	0.780576	ENSG00000221849	32085	intergenic	1.639	7	9	0
2	9	rs264979	rs7580027	G	T	104178377	0.4195	5.7544e-12	-0.012061	0.0017515	0.904888	ENSG00000221849	32658	intergenic	0.352	7	9	0
2	9	rs264979	rs6733755	C	T	104179160	0.4195	5.7544e-12	-0.012061	0.0017515	0.904888	ENSG00000221849	33441	intergenic	1.959	7	9	0
2	9	rs264979	rs6716087	A	C	104179269	0.4811	9.90832e-09	-0.0099921	0.0017431	0.780576	ENSG00000221849	33550	intergenic	6.939	6	9	0
2	9	rs264979	rs10174252	G	C	104179662	0.4811	9.63385e-09	-0.010001	0.0017433	0.780576	ENSG00000221849	33943	intergenic	2.187	7	9	0
2	9	rs264979	rs10174328	T	C	104179699	0.4811	9.50824e-09	-0.010005	0.0017433	0.780576	ENSG00000221849	33980	intergenic	3.965	7	9	0
2	9	rs264979	rs10186556	T	A	104179749	0.4811	9.72076e-09	-0.0099976	0.0017431	0.780576	ENSG00000221849	34030	intergenic	1.325	7	9	0
2	9	rs264979	rs13412896	A	C	104181479	0.4175	NA	NA	NA	0.889239	ENSG00000221849	35760	intergenic	0.582	6	9	0
2	9	rs264979	rs56161875	C	T	104181559	0.4811	NA	NA	NA	0.780576	ENSG00000221849	35840	intergenic	0.65	7	9	0
2	9	rs264979	rs13413037	A	G	104181649	0.4195	NA	NA	NA	0.904888	ENSG00000221849	35930	intergenic	1.308	6	9	0
2	9	rs264979	rs10865053	C	T	104182857	0.4891	8.73172e-08	-0.009324	0.0017423	0.759199	ENSG00000221849	37138	intergenic	6.592	6	9	0
2	9	rs264979	rs6543217	G	A	104183265	0.4195	5.52077e-12	-0.012069	0.0017513	0.904888	ENSG00000221849	37546	intergenic	6.354	6	9	0
2	9	rs264979	rs6543218	C	A	104183537	0.4195	5.49541e-12	-0.01207	0.0017513	0.904888	ENSG00000221849	37818	intergenic	1.066	7	9	0
2	9	rs12712181	rs72820209	T	A	104183870	0.4463	3.83884e-08	-0.009557	0.0017382	0.861034	ENSG00000221849	38151	intergenic	2.642	6	9	0
2	9	rs264979	rs9941588	G	A	104184130	0.4811	9.89008e-09	-0.0099935	0.0017432	0.780576	ENSG00000221849	38411	intergenic	3.062	6	9	0
2	9	rs264979	rs11894393	G	A	104185339	0.4811	9.64717e-09	-0.010001	0.0017433	0.780576	ENSG00000221849	39620	intergenic	0.175	7	9	0
2	9	rs264979	rs13411937	G	A	104186652	0.4195	5.54626e-12	-0.012066	0.0017509	0.904888	ENSG00000221849	40933	intergenic	9.744	6	9	0
2	9	rs264979	rs60608011	A	C	104187523	0.4811	9.76787e-09	-0.0099973	0.0017433	0.780576	ENSG00000221849	41804	intergenic	3.686	7	9	0
2	9	rs264979	rs57331664	C	A	104187685	0.4811	9.65606e-09	-0.010001	0.0017433	0.780576	ENSG00000221849	41966	intergenic	0.168	7	9	0
2	9	rs264979	rs13402723	T	C	104187889	0.4811	9.88098e-09	-0.009994	0.0017433	0.780576	ENSG00000221849	42170	intergenic	2.259	7	9	0
2	9	rs264979	rs17336684	A	G	104189306	0.4811	1.26648e-08	-0.0099206	0.0017433	0.780576	ENSG00000221849	43587	intergenic	0.428	7	9	0
2	9	rs264979	rs11885577	A	G	104190846	0.4891	1.14657e-07	-0.0092398	0.0017427	0.759199	ENSG00000221849	45127	intergenic	5.856	7	9	0
2	9	rs264979	rs2375765	T	A	104191317	0.4205	7.24436e-12	-0.011992	0.0017499	0.900743	ENSG00000221849	45598	intergenic	1.47	6	9	0
2	9	rs264979	rs2375766	A	G	104191900	0.4205	7.26106e-12	-0.011991	0.0017499	0.900743	ENSG00000221849	46181	intergenic	0.889	7	9	0
2	9	rs264979	rs7559489	C	T	104192377	0.4205	7.26106e-12	-0.011991	0.0017499	0.900743	ENSG00000221849	46658	intergenic	2.889	6	9	0
2	9	rs264979	rs7569356	A	G	104192887	0.4334	3.1842e-12	-0.012171	0.0017462	0.949395	ENSG00000221849	47168	intergenic	7.389	7	9	0
2	9	rs264979	rs6751174	T	C	104193230	0.4811	1.20033e-08	-0.0099382	0.0017436	0.780576	ENSG00000231723	46858	intergenic	2.066	6	9	0
2	9	rs264979	rs1597750	A	G	104195314	0.4811	1.17193e-08	-0.0099453	0.0017436	0.780576	ENSG00000231723	44774	intergenic	1.375	NA	9	0
2	9	rs264979	rs6543220	C	A	104195719	0.4205	7.24436e-12	-0.011992	0.0017499	0.900743	ENSG00000231723	44369	intergenic	0.441	6	9	0
2	9	rs264979	rs6738539	T	C	104195755	0.4205	7.29458e-12	-0.01199	0.0017498	0.900743	ENSG00000231723	44333	intergenic	1.973	7	9	0
2	9	rs264979	rs7591265	T	C	104196439	0.4195	7.43019e-12	-0.011995	0.0017513	0.904888	ENSG00000231723	43649	intergenic	5.787	7	9	0
2	9	rs264979	rs12329387	A	C	104197423	0.4831	NA	NA	NA	0.774107	ENSG00000231723	42665	intergenic	2.195	6	9	0
2	9	rs264979	rs12327970	G	T	104197609	0.4811	1.20282e-08	-0.0099376	0.0017436	0.780576	ENSG00000231723	42479	intergenic	2.598	6	9	0
2	9	rs264979	rs2375787	G	C	104198276	0.4334	NA	NA	NA	0.949395	ENSG00000231723	41812	intergenic	0.259	7	9	0
2	9	rs264979	rs2084814	C	T	104198288	0.4205	8.93305e-12	-0.011944	0.0017505	0.900743	ENSG00000231723	41800	intergenic	0.609	NA	9	0
2	9	rs264979	rs6711344	G	A	104199025	0.4155	6.03949e-12	-0.012045	0.0017511	0.889638	ENSG00000231723	41063	intergenic	1.171	7	9	0
2	9	rs264979	rs2060818	A	G	104201593	0.4891	1.44145e-07	-0.0091642	0.0017423	0.759199	ENSG00000231723	38495	intergenic	3.674	NA	9	0
2	9	rs264979	rs6727525	G	T	104202712	0.4195	9.03649e-12	-0.011947	0.0017514	0.904888	ENSG00000231723	37376	intergenic	1.983	6	9	0
2	9	rs264979	rs7578295	G	A	104203551	0.4811	1.41873e-08	-0.0098884	0.0017436	0.780576	ENSG00000231723	36537	intergenic	1.058	6	9	0
2	9	rs264979	rs6543221	C	T	104203677	0.4205	NA	NA	NA	0.900743	ENSG00000231723	36411	intergenic	2.816	7	9	0
2	9	rs264979	rs6543222	C	T	104203679	0.4195	8.64968e-12	-0.011958	0.0017514	0.904888	ENSG00000231723	36409	intergenic	1.716	7	9	0
2	9	rs264979	rs10171837	C	T	104204310	0.4881	1.33506e-07	-0.0091911	0.0017427	0.761278	ENSG00000231723	35778	intergenic	2.99	6	9	0
2	9	rs264979	rs1869073	C	T	104204520	0.4205	4.46684e-12	-0.012115	0.0017503	0.900743	ENSG00000231723	35568	intergenic	0.144	NA	9	0
2	9	rs264979	rs1869072	A	G	104204603	0.4334	3.59749e-12	-0.012141	0.0017463	0.949395	ENSG00000231723	35485	intergenic	0.446	NA	9	0
2	9	rs264979	rs6725382	C	T	104207059	0.4334	3.81944e-12	-0.012127	0.0017464	0.949395	ENSG00000231723	33029	intergenic	1.132	6	9	0
2	9	rs264979	rs2100330	G	A	104207776	0.4334	3.92645e-12	-0.012119	0.0017462	0.949395	ENSG00000231723	32312	intergenic	1.171	NA	9	0
2	9	rs264979	rs13398688	G	A	104207812	0.4811	1.45781e-08	-0.0098802	0.0017436	0.780576	ENSG00000231723	32276	intergenic	2.113	6	9	0
2	9	rs264979	rs6726525	A	G	104208168	0.4205	NA	NA	NA	0.900743	ENSG00000231723	31920	intergenic	2.735	7	9	0
2	9	rs266067	rs10188273	C	T	104209003	0.332	1.90634e-09	-0.010552	0.001757	0.71775	ENSG00000231723	31085	intergenic	1.451	7	9	0
2	9	rs266067	rs1597749	C	T	104212231	0.331	2.11154e-09	-0.010521	0.0017567	0.7195	ENSG00000231723	27857	intergenic	1.845	7	9	0
2	9	rs264979	rs10207229	A	G	104212873	0.4334	4.29536e-12	-0.012098	0.0017464	0.949395	ENSG00000231723	27215	intergenic	4.838	7	9	0
2	9	rs264979	rs10185399	T	A	104214676	0.4891	1.64286e-07	-0.0091244	0.0017427	0.759199	ENSG00000231723	25412	intergenic	1.331	7	9	0
2	9	rs264979	rs2044934	G	T	104215251	0.4205	1.06414e-11	-0.011895	0.0017498	0.900743	ENSG00000231723	24837	intergenic	0.477	NA	9	0
2	9	rs264979	rs2044933	C	T	104215727	0.4891	1.70098e-07	-0.0091131	0.0017426	0.759199	ENSG00000231723	24361	intergenic	1.798	NA	9	0
2	9	rs264979	rs7590785	T	A	104217338	0.4334	4.2462e-12	-0.012101	0.0017464	0.949395	ENSG00000231723	22750	intergenic	0.54	7	9	0
2	9	rs264979	rs4851660	A	T	104217789	0.4205	9.68278e-12	-0.011919	0.0017498	0.900743	ENSG00000231723	22299	intergenic	4.85	7	9	0
2	9	rs264979	rs10189533	A	C	104219240	0.4205	9.72747e-12	-0.011923	0.0017505	0.900743	ENSG00000231723	20848	intergenic	2.764	6	9	0
2	9	rs264979	rs1451986	A	G	104219692	0.4324	3.81066e-12	-0.012128	0.0017465	0.953383	ENSG00000231723	20396	intergenic	1.237	6	9	0
2	9	rs264979	rs10192716	G	C	104220144	0.4195	9.77237e-12	-0.011926	0.0017513	0.904888	ENSG00000231723	19944	intergenic	6.673	6	9	0
2	9	rs264979	rs7560924	A	G	104220242	0.4334	4.29536e-12	-0.012098	0.0017465	0.949395	ENSG00000231723	19846	intergenic	3.835	7	9	0
2	9	rs264979	rs1451987	G	C	104222490	0.4334	4.03645e-12	-0.012114	0.0017465	0.949395	ENSG00000231723	17598	intergenic	3.59	5	9	0
2	9	rs264979	rs1451988	G	A	104222589	0.4195	9.77237e-12	-0.011927	0.0017513	0.904888	ENSG00000231723	17499	intergenic	1.303	6	9	0
2	9	rs264979	rs10209710	A	T	104226203	0.4334	3.83707e-12	-0.012127	0.0017466	0.949395	ENSG00000231723	13885	intergenic	6.554	7	9	0
2	9	rs264979	rs13428758	G	A	104226645	0.4334	4.02717e-12	-0.012115	0.0017466	0.949395	ENSG00000231723	13443	intergenic	1.349	6	9	0
2	9	rs264979	rs58177455	C	T	104226989	0.4891	1.25632e-07	-0.0092105	0.0017427	0.759199	ENSG00000231723	13099	intergenic	0.163	7	9	0
2	9	rs264979	rs7608358	G	A	104227258	0.4334	3.96278e-12	-0.012119	0.0017466	0.949395	ENSG00000231723	12830	intergenic	0.756	7	9	0
2	9	rs264979	rs7558335	C	T	104227395	0.4195	9.1622e-12	-0.011943	0.0017514	0.904888	ENSG00000231723	12693	intergenic	1.298	7	9	0
2	9	rs264979	rs6543223	C	T	104227869	0.4175	6.10942e-12	-0.012043	0.0017512	0.889682	ENSG00000231723	12219	intergenic	2.037	7	9	0
2	9	rs264979	rs6543224	T	C	104227871	0.4215	8.8308e-12	-0.01194	0.0017495	0.897073	ENSG00000231723	12217	intergenic	1.083	7	9	0
2	9	rs264979	rs13396809	A	G	104228863	0.4195	6.39735e-12	-0.012033	0.0017514	0.904888	ENSG00000231723	11225	intergenic	0.97	7	9	0
2	9	rs264979	rs13426115	T	C	104229299	0.4334	2.71019e-12	-0.012212	0.0017466	0.949395	ENSG00000231723	10789	intergenic	1.658	6	9	0
2	9	rs264979	rs7570362	T	A	104231295	0.4175	3.34195e-12	-0.012193	0.0017512	0.889239	ENSG00000231723	8793	intergenic	8.901	6	9	0
2	9	rs264979	rs7583069	A	G	104231852	0.4344	2.11349e-12	-0.012274	0.0017466	0.945422	ENSG00000231723	8236	intergenic	2.161	6	9	0
2	9	rs264979	rs10185978	C	T	104233265	0.4215	4.83059e-12	-0.012095	0.0017502	0.896614	ENSG00000231723	6823	intergenic	0.362	5	9	0
2	9	rs264979	rs10194188	A	G	104233274	0.4344	2.11836e-12	-0.012273	0.0017466	0.945422	ENSG00000231723	6814	intergenic	1.184	5	9	0
2	9	rs264979	rs1823673	C	T	104234628	0.4344	2.05589e-12	-0.012281	0.0017466	0.945422	ENSG00000231723	5460	intergenic	6.977	6	9	0
2	9	rs264979	rs11123964	T	C	104236650	0.4344	NA	NA	NA	0.945422	ENSG00000231723	3438	intergenic	9.644	7	9	0
2	9	rs264979	rs12328095	A	G	104236822	0.4215	4.84172e-12	-0.012094	0.0017501	0.896614	ENSG00000231723	3266	intergenic	3.344	7	9	0
2	9	rs264979	rs2167539	T	C	104237468	0.4901	9.18967e-08	-0.0093092	0.0017426	0.756058	ENSG00000231723	2620	intergenic	3.571	7	8	0
2	9	rs264979	rs6719978	A	G	104238501	0.4175	3.64754e-12	-0.012172	0.0017512	0.889239	ENSG00000231723	1587	intergenic	0.499	5	9	0
2	9	rs264979	rs1584705	C	T	104239736	0.4215	5.05825e-12	-0.012084	0.0017501	0.896614	ENSG00000231723	0	upstream	1.776	6	9	0
2	9	rs264979	rs11123965	C	T	104240205	0.4205	4.27563e-12	-0.012134	0.0017514	0.900743	ENSG00000231723	0	ncRNA_exonic	0.775	7	9	0
2	9	rs264979	rs11888473	C	T	104240420	0.4205	5.06991e-12	-0.012083	0.0017502	0.89275	ENSG00000231723	0	downstream	0.102	7	9	0
2	9	rs264979	rs12328263	A	T	104240596	0.4344	2.06063e-12	-0.01228	0.0017466	0.945422	ENSG00000231723	0	downstream	7.255	6	9	0
2	9	rs264979	rs10167065	G	C	104242180	0.4215	5.10505e-12	-0.012081	0.0017501	0.896614	ENSG00000231723	1892	intergenic	1.031	6	9	0
2	9	rs264979	rs7585415	A	G	104242306	0.4215	5.09331e-12	-0.012081	0.0017501	0.896614	ENSG00000231723	2018	intergenic	1.895	7	9	0
2	9	rs264979	rs7576621	G	T	104242721	0.4205	5.16416e-12	-0.012086	0.0017513	0.900743	ENSG00000231723	2433	intergenic	2.653	6	9	0
2	9	rs264979	rs10184977	C	T	104242980	0.4344	2.06063e-12	-0.01228	0.0017466	0.945422	ENSG00000231723	2692	intergenic	0.973	6	9	0
2	9	rs264979	rs10182416	G	A	104242992	0.4344	2.38781e-12	-0.012244	0.0017467	0.945422	ENSG00000231723	2704	intergenic	0.376	7	9	0
2	9	rs264979	rs10170544	A	C	104243220	0.4175	3.43558e-12	-0.012185	0.0017511	0.889239	ENSG00000231723	2932	intergenic	2.223	7	9	0
2	9	rs264979	rs10193525	A	G	104243331	0.4344	2.09894e-12	-0.012275	0.0017466	0.945422	ENSG00000231723	3043	intergenic	0.187	6	9	0
2	9	rs264979	rs10182738	G	A	104243342	0.4215	5.17607e-12	-0.012078	0.0017501	0.896614	ENSG00000231723	3054	intergenic	1.79	6	9	0
2	9	rs264979	rs10193705	A	G	104243508	0.4215	5.11682e-12	-0.01208	0.0017501	0.896614	ENSG00000231723	3220	intergenic	3.026	6	9	0
2	9	rs264979	rs1304360	T	C	104244081	0.4334	2.70396e-12	-0.012213	0.0017466	0.949395	ENSG00000231723	3793	intergenic	2.287	NA	9	0
2	9	rs264979	rs4851661	A	C	104245978	0.4334	2.5293e-12	-0.012229	0.0017466	0.949395	ENSG00000231723	5690	intergenic	3.416	6	9	0
2	9	rs264979	rs1597746	T	C	104248576	0.4334	2.44906e-12	-0.012237	0.0017465	0.949395	ENSG00000231723	8288	intergenic	2.185	NA	1	0
2	9	rs264979	rs4441492	G	A	104249538	0.4195	6.93426e-12	-0.012011	0.0017511	0.904888	ENSG00000231723	9250	intergenic	2.053	7	9	0
2	9	rs264979	rs6543227	G	A	104250376	0.4334	1.87068e-12	-0.012303	0.0017466	0.949395	ENSG00000231723	10088	intergenic	8.24	7	9	0
2	9	rs264979	rs1901481	C	T	104251732	0.4215	4.83059e-12	-0.012094	0.00175	0.896614	ENSG00000231723	11444	intergenic	0.198	NA	9	0
2	9	rs264979	rs1901480	A	G	104253005	0.4334	2.24388e-12	-0.012257	0.0017464	0.949395	ENSG00000231723	12717	intergenic	1.74	NA	9	0
2	9	rs264979	rs1901479	C	T	104253101	0.4334	2.52348e-12	-0.012229	0.0017464	0.949395	ENSG00000231723	12813	intergenic	0.875	NA	9	0
2	9	rs264979	rs10198643	C	A	104253461	0.4205	6.51628e-12	-0.012013	0.0017491	0.900743	ENSG00000231723	13173	intergenic	2.108	6	9	0
2	9	rs264979	rs264963	G	A	104254564	0.4344	2.26464e-12	0.012255	0.0017463	0.945422	ENSG00000231723	14276	intergenic	2.225	5	9	0
2	9	rs264979	rs264964	A	G	104255500	0.4324	2.25424e-12	0.012256	0.0017463	0.945682	ENSG00000231723	15212	intergenic	1.579	NA	9	0
2	9	rs264979	rs264965	A	C	104255919	0.4205	5.42001e-12	0.012062	0.0017495	0.900743	ENSG00000231723	15631	intergenic	3.011	7	9	0
2	9	rs264979	rs264966	C	T	104255937	0.4205	6.54636e-12	0.012021	0.0017504	0.900743	ENSG00000231723	15649	intergenic	1.884	7	9	0
2	9	rs264979	rs264967	A	G	104256215	0.4334	2.26986e-12	0.012254	0.0017463	0.949395	ENSG00000231723	15927	intergenic	3.011	NA	9	0
2	9	rs264979	rs264968	G	A	104256567	0.4334	2.22844e-12	0.012259	0.0017463	0.949395	ENSG00000231723	16279	intergenic	2.108	NA	9	0
2	9	rs264979	rs264969	G	T	104257915	0.4334	2.58226e-12	0.012223	0.0017463	0.949395	ENSG00000231723	17627	intergenic	2.63	NA	9	0
2	9	rs264979	rs264970	C	T	104258261	0.4205	5.40754e-12	0.012067	0.0017502	0.900743	ENSG00000231723	17973	intergenic	2.62	NA	9	0
2	9	rs264979	rs264971	C	G	104258476	0.4205	5.79429e-12	0.01205	0.0017502	0.900743	ENSG00000231723	18188	intergenic	0.137	7	9	0
2	9	rs264979	rs264972	T	G	104259981	0.4205	5.91562e-12	0.012044	0.0017501	0.900743	ENSG00000231723	19693	intergenic	1.049	NA	9	0
2	9	rs264979	rs1457458	C	T	104260702	0.4334	2.38232e-12	0.012241	0.0017462	0.949395	ENSG00000231723	20414	intergenic	2.087	6	9	0
2	9	rs264979	rs1669607	C	T	104261180	0.4334	2.36592e-12	0.012244	0.0017462	0.949395	ENSG00000231723	20892	intergenic	0.052	7	9	0
2	9	rs264979	rs1669608	G	C	104261295	0.4334	2.38232e-12	0.012242	0.0017462	0.949395	ENSG00000231723	21007	intergenic	1.137	6	9	0
2	9	rs264979	rs12996374	G	T	104263033	0.4284	NA	NA	NA	0.929735	ENSG00000231723	22745	intergenic	1.828	6	9	0
2	9	rs264979	rs13013875	T	G	104263037	0.4046	NA	NA	NA	0.856937	ENSG00000231723	22749	intergenic	0.185	6	9	0
2	9	rs264979	rs2445956	G	A	104264655	0.4225	NA	NA	NA	0.900493	ENSG00000231723	24367	intergenic	11.6	7	9	0
2	9	rs264979	rs1669602	T	C	104264825	0.4205	6.06736e-12	0.012021	0.0017476	0.908313	ENSG00000231723	24537	intergenic	10.84	5	9	0
2	9	rs264979	rs1673464	T	C	104264977	0.4205	6.06736e-12	0.012021	0.0017476	0.908313	ENSG00000231723	24689	intergenic	2.007	5	9	0
2	9	rs264979	rs36011874	G	C	104265499	0.4175	NA	NA	NA	0.896819	ENSG00000231723	25211	intergenic	0.369	6	7	0
2	9	rs264979	rs1673465	A	G	104265522	0.4344	1.87499e-12	0.012301	0.0017463	0.953145	ENSG00000231723	25234	intergenic	2.51	7	7	0
2	9	rs264979	rs1673466	G	A	104265569	0.4344	1.67109e-12	0.012329	0.0017463	0.953145	ENSG00000231723	25281	intergenic	0.681	6	7	0
2	9	rs264979	rs1669603	A	T	104265586	0.4344	1.90108e-12	0.012297	0.0017463	0.953145	ENSG00000231723	25298	intergenic	4.192	6	7	0
2	9	rs264979	rs1673467	G	C	104266248	0.4901	1.19097e-07	0.009227	0.0017426	0.762802	ENSG00000231723	25960	intergenic	0.646	7	9	0
2	9	rs264979	rs1673468	C	T	104266788	0.4235	1.2218e-11	0.011839	0.0017467	0.896394	ENSG00000231723	26500	intergenic	2.326	7	9	0
2	9	rs264979	rs1673469	T	A	104266890	0.4225	1.2388e-11	0.011841	0.0017475	0.900493	ENSG00000231723	26602	intergenic	0.089	7	9	0
2	9	rs264979	rs142785607	G	T	104267493	0.4632	NA	NA	NA	0.844792	ENSG00000231723	27205	intergenic	1.389	6	9	0
2	9	rs264979	rs67716713	A	C	104267572	0.4364	5.49541e-12	0.012035	0.0017462	0.945532	ENSG00000231723	27284	intergenic	1.295	7	9	0
2	9	rs264979	rs34212081	A	C	104267777	0.4344	NA	NA	NA	0.953145	ENSG00000231723	27489	intergenic	2.522	6	9	0
2	9	rs264979	rs264974	A	T	104268285	0.4344	3.25087e-12	0.012168	0.0017465	0.953145	ENSG00000231723	27997	intergenic	3.649	7	9	0
2	9	rs264979	rs264975	A	G	104268301	0.4205	5.80764e-12	0.012033	0.0017478	0.908313	ENSG00000231723	28013	intergenic	0.051	NA	9	0
2	9	rs264979	rs264976	T	C	104268557	0.4354	2.58821e-12	0.012222	0.0017463	0.949183	ENSG00000231723	28269	intergenic	1.034	NA	9	0
2	9	rs264979	rs264977	C	T	104268754	0.4215	5.95662e-12	0.01202	0.0017468	0.904176	ENSG00000231723	28466	intergenic	4.855	6	9	0
2	9	rs264979	rs264978	A	C	104268790	0.4205	5.91562e-12	0.012027	0.0017476	0.908313	ENSG00000231723	28502	intergenic	2.194	6	9	0
2	9	rs264979	rs264979	T	A	104269262	0.4344	5.92925e-13	0.012573	0.0017456	1	ENSG00000231723	28974	intergenic	0.232	6	9	0
2	9	rs264979	rs264980	T	C	104269979	0.4205	6.10942e-12	0.012019	0.0017476	0.908313	ENSG00000231723	29691	intergenic	3.426	NA	9	0
2	9	rs264979	rs264919	A	C	104271686	0.4334	2.71644e-12	0.012211	0.0017465	0.957123	ENSG00000231723	31398	intergenic	1.704	7	9	0
2	9	rs264979	rs264920	G	A	104271898	0.4821	1.2006e-08	0.0099381	0.0017436	0.78418	ENSG00000231723	31610	intergenic	2.31	7	9	0
2	9	rs264979	rs264921	G	A	104273554	0.4354	5.37032e-12	0.012043	0.0017464	0.949474	ENSG00000231723	33266	intergenic	5.407	6	9	0
2	9	rs264979	rs264922	G	A	104273996	0.4354	5.64937e-12	0.012029	0.0017462	0.949474	ENSG00000231723	33708	intergenic	3.405	7	9	0
2	9	rs264979	rs264923	T	C	104275976	0.4225	1.0617e-11	0.011879	0.0017475	0.900493	ENSG00000231723	35688	intergenic	0.181	6	9	0
2	9	rs264979	rs264924	T	C	104276011	0.4225	NA	NA	NA	0.900493	ENSG00000231723	35723	intergenic	3.316	7	9	0
2	9	rs264979	rs171939	G	A	104276502	0.4225	1.02329e-11	0.011889	0.0017474	0.900493	ENSG00000231723	36214	intergenic	4.201	6	9	0
2	9	rs264979	rs264925	G	A	104278688	0.4225	1.00925e-11	0.011892	0.0017475	0.900493	ENSG00000231723	38400	intergenic	3.637	6	9	0
2	9	rs264979	rs264926	A	C	104279490	0.4205	5.15229e-12	0.01206	0.0017475	0.908313	ENSG00000231723	39202	intergenic	0.471	5	9	0
2	9	rs264979	rs264927	C	T	104281272	0.4076	1.77419e-11	0.011736	0.0017454	0.796178	ENSG00000231723	40984	intergenic	1.225	5	7	0
2	9	rs264979	rs264928	G	C	104282744	0.4006	2.18273e-11	0.011685	0.0017457	0.809468	ENSG00000231723	42456	intergenic	0.282	7	5	0
2	9	rs264979	rs264929	C	T	104283391	0.3966	9.66051e-12	0.011898	0.0017468	0.826279	ENSG00000231723	43103	intergenic	1.783	6	5	0
2	9	rs264979	rs264930	C	T	104285180	0.3986	9.7051e-12	0.011891	0.0017458	0.817502	ENSG00000231723	44892	intergenic	0.505	5	5	0
2	9	rs264979	rs264931	A	G	104285359	0.3966	9.37562e-12	0.011906	0.0017468	0.826279	ENSG00000231723	45071	intergenic	1.826	7	5	0
2	9	rs12712181	rs264932	G	A	104288396	0.4453	3.28473e-08	0.0096023	0.0017378	0.892893	ENSG00000231723	48108	intergenic	2.367	7	5	0
2	9	rs264979	rs264933	C	T	104292134	0.4135	1.37404e-11	0.011802	0.0017456	0.853122	ENSG00000231723	51846	intergenic	0.894	7	5	0
2	9	rs264979	rs264934	G	T	104295479	0.4125	NA	NA	NA	0.760282	ENSG00000231723	55191	intergenic	2.484	6	5	0
2	9	rs264979	rs264935	T	C	104295741	0.3966	9.18333e-12	0.011912	0.0017468	0.826279	ENSG00000231723	55453	intergenic	2.554	7	5	0
2	9	rs264979	rs264936	A	G	104295747	0.3986	9.59401e-12	0.011893	0.0017458	0.817502	ENSG00000231723	55459	intergenic	1.876	7	5	0
2	9	rs264979	rs264937	A	G	104296570	0.3976	9.77237e-12	0.011896	0.0017468	0.821882	ENSG00000231723	56282	intergenic	0.727	7	7	0
2	9	rs264979	rs264938	C	T	104296743	0.3976	9.46237e-12	0.011904	0.0017468	0.821882	ENSG00000231723	56455	intergenic	2.483	7	7	0
2	9	rs264979	rs264939	C	G	104296940	0.4891	1.06586e-07	0.0092679	0.0017437	0.751387	ENSG00000231723	56652	intergenic	0.415	7	9	0
2	9	rs264979	rs264940	C	A	104297247	0.3976	9.44061e-12	0.011904	0.0017468	0.821882	ENSG00000231723	56959	intergenic	3.416	6	9	0
2	9	rs264979	rs264941	A	C	104297420	0.4095	5.55904e-12	0.012036	0.0017467	0.869502	ENSG00000231723	57132	intergenic	4.596	7	9	0
2	9	rs264979	rs264942	C	A	104297677	0.4781	6.07995e-09	0.010144	0.0017446	0.758999	ENSG00000231723	57389	intergenic	1.078	7	9	0
2	9	rs264979	rs264943	A	C	104298541	0.4781	7.00648e-09	0.010099	0.0017439	0.758999	ENSG00000231723	58253	intergenic	1.867	7	9	0
2	9	rs264979	rs264944	C	T	104298619	0.4115	5.79429e-12	0.01202	0.0017459	0.860999	ENSG00000231723	58331	intergenic	3.284	7	9	0
2	9	rs264979	rs264945	T	C	104298784	0.3966	9.68278e-12	0.011897	0.0017466	0.826279	ENSG00000231723	58496	intergenic	0.276	7	9	0
2	9	rs264979	rs264946	C	T	104298906	0.3966	9.7499e-12	0.011897	0.0017468	0.826279	ENSG00000231723	58618	intergenic	0.683	7	9	0
2	9	rs264979	rs264947	A	G	104299089	0.3966	1.00462e-11	0.011888	0.0017466	0.826279	ENSG00000231723	58801	intergenic	2.013	6	9	0
2	9	rs264979	rs264948	T	C	104301541	0.4105	6.44169e-12	0.011993	0.0017457	0.857262	ENSG00000231723	61253	intergenic	2.955	7	9	0
2	9	rs12712181	rs1673463	G	A	104301916	0.4463	NA	NA	NA	0.896001	ENSG00000231723	61628	intergenic	1.032	6	7	0
2	9	rs264979	rs1669606	G	A	104301920	0.3926	NA	NA	NA	0.812164	ENSG00000231723	61632	intergenic	0.629	6	7	0
2	9	rs264979	rs264949	C	T	104302490	0.4105	6.59174e-12	0.011987	0.0017457	0.857262	ENSG00000231723	62202	intergenic	2.908	7	9	0
2	9	rs264979	rs264950	C	T	104302935	0.3956	8.59014e-12	0.011927	0.0017467	0.822729	ENSG00000231723	62647	intergenic	1.722	6	9	0
2	9	rs264979	rs264951	A	G	104303008	0.3966	1.03276e-11	0.011882	0.0017467	0.826279	ENSG00000231723	62720	intergenic	2.762	7	9	0
2	9	rs264979	rs264952	C	T	104303311	0.3966	7.8343e-12	0.011954	0.0017472	0.826279	ENSG00000231723	63023	intergenic	14.95	6	9	0
2	9	rs264979	rs264953	A	G	104303387	0.3956	1.02802e-11	0.011883	0.0017467	0.822729	ENSG00000231723	63099	intergenic	1.144	6	9	0
2	9	rs264979	rs264954	T	C	104304216	0.3956	1.00231e-11	0.011889	0.0017467	0.822729	ENSG00000231723	63928	intergenic	0.676	7	9	0
2	9	rs12712181	rs264955	G	A	104304793	0.4463	NA	NA	NA	0.896001	ENSG00000231723	64505	intergenic	2.444	6	9	0
2	9	rs264979	rs264956	G	A	104305359	0.3976	1.02565e-11	0.011876	0.0017458	0.813922	ENSG00000231723	65071	intergenic	4.248	6	9	0
2	9	rs264979	rs264957	T	C	104305595	0.4056	1.10408e-11	0.011857	0.0017456	0.795253	ENSG00000231723	65307	intergenic	2.363	7	9	0
2	9	rs264979	rs264958	T	C	104306016	0.3956	1.01859e-11	0.011884	0.0017467	0.822729	ENSG00000231723	65728	intergenic	0.703	6	9	0
2	9	rs12712181	rs264960	T	A	104306694	0.4573	NA	NA	NA	0.940498	ENSG00000231723	66406	intergenic	6.652	6	9	0
2	9	rs264979	rs264961	T	G	104307810	0.3976	1.08893e-11	0.01186	0.0017456	0.813922	ENSG00000231723	67522	intergenic	0.544	6	9	0
2	9	rs264979	rs264962	G	C	104308545	0.3976	1.0617e-11	0.011867	0.0017456	0.813922	ENSG00000231723	68257	intergenic	0.926	7	9	0
2	9	rs264979	rs34830911	C	T	104311652	0.3976	1.07895e-11	0.011862	0.0017456	0.813922	ENSG00000231723	71364	intergenic	2.233	6	9	0
2	9	rs264979	rs58565191	A	G	104311653	0.3956	9.54993e-12	0.011901	0.0017467	0.822729	ENSG00000231723	71365	intergenic	1.763	6	9	0
2	9	rs264979	rs13012802	C	T	104313050	0.3956	8.37529e-12	0.011934	0.0017467	0.822729	ENSG00000231723	72762	intergenic	6.244	6	9	0
2	9	rs264979	rs13032605	T	C	104313670	0.3956	8.4918e-12	0.01193	0.0017467	0.822729	ENSG00000231723	73382	intergenic	2.223	6	9	0
2	9	rs264979	rs2085483	T	G	104314054	0.3976	9.48418e-12	0.011897	0.0017458	0.813922	ENSG00000231723	73766	intergenic	1.174	6	9	0
2	9	rs264979	rs2085484	A	G	104314216	0.3956	8.51138e-12	0.01193	0.0017467	0.822729	ENSG00000231723	73928	intergenic	0.058	7	9	0
2	9	rs264979	rs1585183	T	C	104314952	0.4	NA	NA	NA	0.86146	ENSG00000231723	74664	intergenic	2.754	7	9	0
2	9	rs264979	rs6718448	G	C	104315943	0.3966	9.54993e-12	0.011895	0.0017458	0.811006	ENSG00000231723	75655	intergenic	0.601	6	9	0
2	9	rs264979	rs7589278	G	A	104317050	0.3976	9.61612e-12	0.011892	0.0017456	0.813922	ENSG00000231723	76762	intergenic	0.817	6	9	0
2	9	rs264979	rs67209022	T	G	104317939	0.3976	NA	NA	NA	0.813922	ENSG00000231723	77651	intergenic	1.294	NA	9	0
2	9	rs264979	rs12620969	G	T	104318287	0.3956	8.57038e-12	0.011928	0.0017467	0.822729	ENSG00000231723	77999	intergenic	3.101	6	9	0
2	9	rs264979	rs12621003	C	T	104318437	0.3956	7.92501e-12	0.011948	0.0017467	0.822729	ENSG00000231723	78149	intergenic	0.034	6	9	0
2	9	rs12712181	rs12712178	G	T	104319048	0.4493	2.50496e-08	0.0096817	0.0017372	0.905523	ENSG00000231723	78760	intergenic	1.963	6	9	0
2	9	rs264979	rs921965	A	G	104319881	0.3976	9.61612e-12	0.011891	0.0017454	0.813922	ENSG00000231723	79593	intergenic	1.863	7	9	0
2	9	rs12712181	rs921966	C	T	104319974	0.4493	2.18374e-08	0.0097233	0.0017373	0.905523	ENSG00000231723	79686	intergenic	2.786	6	9	0
2	9	rs264979	rs921967	A	G	104320141	0.3976	8.97429e-12	0.01191	0.0017457	0.813922	ENSG00000231723	79853	intergenic	1.373	6	9	0
2	9	rs264979	rs11675245	A	G	104320510	0.3976	8.62979e-12	0.011921	0.0017458	0.813922	ENSG00000231723	80222	intergenic	4.603	6	9	0
2	9	rs264979	rs4295030	T	A	104323618	0.3966	8.93305e-12	0.011917	0.0017465	0.818962	ENSG00000231723	83330	intergenic	11.84	7	9	0
2	9	rs264979	rs13012192	G	A	104324926	0.3986	1.28529e-11	0.011822	0.0017461	0.810207	ENSG00000231723	84638	intergenic	3.821	7	9	0
2	9	rs12712181	rs13023284	C	T	104325425	0.4463	3.16665e-08	0.0096158	0.0017382	0.896001	ENSG00000231723	85137	intergenic	0.548	6	9	0
2	9	rs12712181	rs2219372	T	C	104327640	0.4463	3.67198e-08	0.0095678	0.0017377	0.896001	ENSG00000231723	87352	intergenic	0.179	7	9	0
2	9	rs264979	rs7564172	C	T	104329002	0.4115	8.59014e-12	0.011925	0.0017463	0.853571	ENSG00000231723	88714	intergenic	1.079	7	9	0
2	9	rs264979	rs1598777	A	G	104330042	0.4115	8.66962e-12	0.011923	0.0017463	0.853571	ENSG00000231723	89754	intergenic	3.511	7	9	0
2	9	rs264979	rs35105315	G	C	104330106	0.4115	NA	NA	NA	0.853571	ENSG00000231723	89818	intergenic	0.815	6	9	0
2	9	rs264979	rs12990802	C	G	104332651	0.3966	1.43549e-11	0.011799	0.0017469	0.818962	ENSG00000231723	92363	intergenic	7.357	6	9	0
2	9	rs264979	rs12996607	C	G	104333008	0.4125	1.1695e-11	0.011847	0.0017462	0.849934	ENSG00000231723	92720	intergenic	0.245	6	9	0
2	9	rs264979	rs1598778	T	A	104333462	0.4115	NA	NA	NA	0.853571	ENSG00000231723	93174	intergenic	0.729	6	9	0
2	9	rs264979	rs1598779	C	G	104333463	0.4115	1.10408e-11	0.011861	0.0017461	0.853571	ENSG00000231723	93175	intergenic	0.123	6	9	0
2	9	rs264979	rs9789519	G	A	104333681	0.3966	1.7378e-11	0.011753	0.0017473	0.818962	ENSG00000231723	93393	intergenic	1.294	7	9	0
2	9	rs264979	rs1379428	T	C	104333924	0.4115	7.85236e-12	0.011946	0.0017461	0.853571	ENSG00000231723	93636	intergenic	1.765	6	9	0
2	9	rs264979	rs1379429	A	G	104334010	0.3966	1.43549e-11	0.011799	0.0017469	0.818962	ENSG00000231723	93722	intergenic	1.397	6	9	0
2	9	rs264979	rs1947565	A	G	104335186	0.4115	7.4817e-12	0.011959	0.0017462	0.853571	ENSG00000231723	94898	intergenic	1.08	7	9	0
2	9	rs12712181	rs10170621	A	T	104339017	0.4463	3.23966e-08	0.009603	0.0017371	0.896001	ENSG00000231723	98729	intergenic	3.933	6	9	0
2	9	rs264979	rs1457456	C	G	104339810	0.4115	7.44732e-12	0.01196	0.0017463	0.853571	ENSG00000231723	99522	intergenic	0.087	6	9	0
2	9	rs264979	rs1457457	T	A	104340148	0.4115	8.70964e-12	0.011921	0.0017463	0.853571	ENSG00000231723	99860	intergenic	0.458	7	9	0
2	9	rs264979	rs9941537	C	T	104340412	0.3966	1.2218e-11	0.011839	0.0017468	0.818962	ENSG00000231723	100124	intergenic	0.61	6	9	0
2	9	rs264979	rs6713896	C	A	104340676	0.3966	1.20226e-11	0.011844	0.0017469	0.818962	ENSG00000231723	100388	intergenic	0.215	6	9	0
2	9	rs264979	rs2125013	C	T	104341029	0.3966	1.1995e-11	0.011845	0.0017469	0.818962	ENSG00000231723	100741	intergenic	1.049	7	9	0
2	9	rs264979	rs1947566	G	C	104341424	0.3966	1.21339e-11	0.011842	0.0017469	0.818962	ENSG00000231723	101136	intergenic	0.469	7	9	0
2	9	rs264979	rs12987855	A	G	104341997	0.3966	1.33352e-11	0.011818	0.0017469	0.818962	ENSG00000231723	101709	intergenic	1.491	6	9	0
2	9	rs264979	rs9941552	G	A	104342066	0.3966	1.33045e-11	0.011818	0.0017469	0.818962	ENSG00000231723	101778	intergenic	1.325	6	9	0
2	9	rs264979	rs3953834	A	T	104343485	0.4115	NA	NA	NA	0.853571	ENSG00000231723	103197	intergenic	3.174	5	9	0
2	9	rs264979	rs7602419	T	C	104345035	0.4095	8.20352e-12	0.01194	0.0017469	0.862057	ENSG00000231723	104747	intergenic	1.004	7	9	0
2	9	rs264979	rs4014034	C	A	104345435	0.3966	1.32739e-11	0.01182	0.001747	0.818962	ENSG00000231723	105147	intergenic	0.196	7	9	0
2	9	rs264979	rs4014035	G	A	104345661	0.3966	1.31826e-11	0.011822	0.001747	0.818962	ENSG00000231723	105373	intergenic	1.213	6	9	0
2	9	rs264979	rs13029049	A	G	104346314	0.4115	NA	NA	NA	0.853571	ENSG00000231723	106026	intergenic	1.004	6	9	0
2	9	rs264979	rs12478719	T	C	104346788	0.4115	9.12011e-12	0.011911	0.0017465	0.853571	ENSG00000231723	106500	intergenic	12.48	6	9	0
2	9	rs264979	rs2219373	G	A	104347660	0.4115	9.05733e-12	0.011913	0.0017466	0.853571	ENSG00000231723	107372	intergenic	4.434	6	9	0
2	9	rs264979	rs12616436	C	T	104348025	0.3966	1.25893e-11	0.011834	0.001747	0.818962	ENSG00000231723	107737	intergenic	8.91	7	9	0
2	9	rs12712181	rs6543231	C	G	104348172	0.4483	2.4088e-08	0.0096923	0.001737	0.90197	ENSG00000231723	107884	intergenic	0.009	7	9	0
2	9	rs264979	rs7564607	T	C	104349164	0.4115	7.17794e-12	0.011971	0.0017466	0.853571	ENSG00000231723	108876	intergenic	11.1	6	9	0
2	9	rs264979	rs4851663	C	G	104349411	0.3986	1.18577e-11	0.011843	0.0017463	0.810207	ENSG00000231723	109123	intergenic	0.066	5	9	0
2	9	rs264979	rs13014565	C	G	104351181	0.4115	7.6913e-12	0.011955	0.0017467	0.853571	ENSG00000231723	110893	intergenic	0.251	6	9	0
2	9	rs264979	rs12616219	A	C	104352495	0.4115	6.0256e-12	0.012016	0.0017466	0.853571	ENSG00000231723	112207	intergenic	0.314	6	9	0
2	9	rs12712181	rs12712181	G	A	104354232	0.4712	4.56247e-09	0.010198	0.0017395	1	ENSG00000231723	113944	intergenic	6.808	6	9	0
2	9	rs12712181	rs9308868	A	G	104361420	0.4632	9.12011e-12	0.011912	0.0017467	0.755039	ENSG00000232597	112008	intergenic	0.588	6	5	0
2	9	rs12712181	rs1379430	G	A	104367424	0.4672	8.66962e-12	0.01192	0.0017459	0.740215	ENSG00000232597	106004	intergenic	6.172	6	9	0
2	9	rs12712181	rs12615038	G	T	104371856	0.4443	2.76567e-08	0.0096478	0.0017365	0.896668	ENSG00000232597	101572	intergenic	3.977	7	9	0
2	9	rs264979	rs677522	A	G	104374272	0.3887	2.71019e-11	0.011633	0.0017462	0.764886	ENSG00000232597	99156	intergenic	0.238	NA	9	0
2	9	rs12712181	rs138377008	A	T	104374544	0.4622	NA	NA	NA	0.68161	ENSG00000232597	98884	intergenic	3.464	7	8	0
2	9	rs12712181	rs142922380	T	A	104374548	0.4622	NA	NA	NA	0.68161	ENSG00000232597	98880	intergenic	1.154	7	8	0
2	9	rs264979	rs650576	A	T	104375723	0.3887	3.04089e-11	0.011602	0.0017461	0.765707	ENSG00000232597	97705	intergenic	0.934	7	9	0
2	9	rs264979	rs520351	G	C	104377598	0.4801	1.26386e-07	0.0092118	0.0017433	0.694989	ENSG00000232597	95830	intergenic	2.191	7	15	0
2	9	rs264979	rs506466	T	C	104380545	0.4771	9.88781e-08	0.0092893	0.0017432	0.681528	ENSG00000232597	92883	intergenic	7.414	NA	9	0
2	9	rs12712181	rs671722	A	G	104387855	0.4761	4.77419e-08	0.0094916	0.0017385	0.76852	ENSG00000232597	85573	intergenic	1.646	NA	9	0
2	9	rs12712181	rs72820274	A	G	104412924	0.4712	8.25848e-08	-0.0093395	0.001742	0.731366	ENSG00000232597	60504	intergenic	0.44	7	5	0
2	10	rs10804171	rs2971906	T	G	155703266	0.0825	2.1096e-07	0.0091957	0.001772	0.840301	KCNJ3	0	intronic	2.721	NA	5	0
2	10	rs10804171	rs75561433	A	G	155713849	0.07555	2.60016e-07	0.0088523	0.0017187	0.902422	KCNJ3	0	UTR3	16.04	7	5	0
2	10	rs10804171	rs10804171	T	C	155777638	0.07654	4.25109e-08	-0.0096283	0.0017569	1	CBX3P6	19415	intergenic	0.874	6	15	0
2	10	rs10804171	rs10191743	T	A	155875812	0.07058	2.18172e-07	-0.0091085	0.0017573	0.830946	ENSG00000230991	51297	intergenic	1.792	6	14	0
2	10	rs10804171	rs1385386	T	C	156119864	0.073	NA	NA	NA	0.804779	ENSG00000232982:MTND2P20	0	downstream:downstream	1.537	NA	5	0
2	10	rs10804171	rs1601338	G	A	156132155	0.07555	2.57099e-06	-0.0082736	0.0017594	0.674259	ATP5A1P2	5756	intergenic	1.87	NA	9	0
2	10	rs10804171	rs1948731	C	G	156151388	0.07952	1.19289e-06	-0.0086966	0.0017906	0.657668	MTND4P28	16147	intergenic	0.115	7	7	0
2	10	rs10804171	rs7589312	T	C	156160747	0.07455	1.57688e-06	-0.0085117	0.0017728	0.708671	MTND4P28	6788	intergenic	2.809	7	5	0
2	10	rs10804171	rs1486073	A	G	156163802	0.07455	1.28944e-06	-0.0085141	0.0017586	0.708671	MTND4P28	3733	intergenic	0.976	6	5	0
2	10	rs10804171	rs6435732	T	C	156223034	0.08052	1.27761e-06	-0.0086837	0.0017929	0.648172	RNU6-546P	35995	intergenic	4.869	7	14	0
2	10	rs10804171	rs10194613	T	C	156256991	0.07455	3.2337e-06	-0.0082525	0.0017726	0.708671	RNU6-546P	69952	intergenic	2.199	7	15	0
2	10	rs10804171	rs6435776	T	A	156288500	0.07455	1.88105e-06	-0.0083234	0.0017465	0.708671	RNU6-546P	101461	intergenic	2.244	6	9	0
2	10	rs10804171	rs10185996	C	A	156291134	0.07853	1.91911e-06	-0.0085482	0.0017951	0.667388	RNU6-546P	104095	intergenic	1.126	7	9	0
2	10	rs10804171	rs1505729	T	A	156310469	0.07952	1.1984e-06	-0.0087606	0.0018041	0.657668	RNU6-546P	123430	intergenic	3.978	6	15	0
2	10	rs10804171	rs1505727	T	C	156312118	0.07952	1.51112e-06	-0.0086753	0.0018036	0.657668	RNU6-546P	125079	intergenic	3.657	NA	15	0
2	10	rs10804171	rs4490128	G	A	156322314	0.07555	1.46859e-06	-0.0085179	0.0017688	0.697972	RNU6-546P	135275	intergenic	0.339	7	9	0
2	10	rs10804171	rs10209181	G	A	156358237	0.07952	3.41665e-06	-0.0083577	0.0017996	0.612906	RNU6-546P	171198	intergenic	3.444	6	9	0
2	10	rs10804171	rs10172279	C	T	156405731	0.07952	3.22701e-06	-0.0083762	0.0017991	0.612906	RNU6-546P	218692	intergenic	1.719	7	9	0
2	11	rs16822665	rs6432706	T	C	162797621	0.3231	1.62293e-08	-0.0098621	0.0017461	0.792277	SLC4A10	0	intronic	0.318	7	5	0
2	11	rs16822665	rs13430823	C	T	162802795	0.325	1.88278e-08	-0.0098272	0.0017478	0.79179	SLC4A10	0	intronic	2.422	3a	5	0
2	11	rs16822665	rs13421039	T	C	162803883	0.3241	1.96743e-08	-0.009812	0.0017475	0.795889	SLC4A10	0	intronic	1.76	5	5	0
2	11	rs16822665	rs1913808	A	G	162804678	0.3241	1.75267e-08	-0.0098467	0.0017474	0.795889	SLC4A10	0	intronic	20.2	3a	5	0
2	11	rs16822665	rs10221808	G	A	162813807	0.3191	2.44737e-08	-0.0097241	0.0017436	0.775953	SLC4A10	0	intronic	1.065	5	5	0
2	11	rs16822665	rs12617656	C	T	162851147	0.3459	1.27087e-08	-0.0099403	0.0017469	0.892717	DPP4	0	intronic	12.45	5	1	0
2	11	rs16822665	rs4140685	T	G	162852079	0.3459	9.47545e-09	-0.010028	0.0017471	0.892717	DPP4	0	intronic	10.95	5	2	0
2	11	rs16822665	rs7565794	C	T	162859000	0.3489	1.22293e-08	-0.0099496	0.0017466	0.906189	DPP4	0	intronic	15.65	5	2	0
2	11	rs16822665	rs6432707	T	A	162863959	0.3479	1.41514e-08	-0.0099091	0.0017471	0.910134	DPP4	0	intronic	0.016	5	4	0
2	11	rs16822665	rs10166311	A	G	162867613	0.3449	1.09977e-08	-0.0099764	0.0017457	0.929907	DPP4	0	intronic	4.307	5	4	0
2	11	rs16822665	rs10166124	T	C	162867622	0.3449	1.16681e-08	-0.0099619	0.0017463	0.929907	DPP4	0	intronic	2.265	3a	4	0
2	11	rs16822665	rs1014444	G	A	162868858	0.3668	2.27982e-08	-0.009816	0.0017562	0.850198	DPP4	0	intronic	6.701	4	2	0
2	11	rs16822665	rs2300757	C	G	162874170	0.3449	1.06512e-08	-0.0099872	0.001746	0.929907	DPP4	0	intronic	14.1	7	2	0
2	11	rs16822665	rs12692646	A	T	162877028	0.3429	1.10078e-08	-0.0099713	0.0017449	0.938009	DPP4	0	intronic	7.489	6	4	0
2	11	rs16822665	rs2302873	C	T	162879452	0.3429	9.82879e-09	-0.010007	0.0017453	0.938009	DPP4	0	intronic	1.291	5	4	0
2	11	rs16822665	rs13409045	T	C	162880383	0.4145	3.4033e-06	-0.0082239	0.0017705	0.716159	DPP4	0	intronic	2.701	6	4	0
2	11	rs16822665	rs2300755	A	G	162883962	0.3867	2.63572e-07	-0.0090536	0.0017587	0.786981	DPP4	0	intronic	2.33	NA	4	0
2	11	rs16822665	rs2268889	T	C	162885110	0.3519	2.80092e-08	-0.0097059	0.0017477	0.906683	DPP4	0	intronic	2.111	NA	4	1
2	11	rs16822665	rs4664443	G	A	162885889	0.4145	3.08248e-06	-0.0082563	0.0017697	0.717619	DPP4	0	intronic	5.42	2b	2	0
2	11	rs16822665	rs7573951	G	A	162887741	0.4135	2.59e-06	-0.0083197	0.0017698	0.718982	DPP4	0	intronic	5.78	5	4	0
2	11	rs16822665	rs2284872	A	G	162887969	0.3419	1.50522e-08	-0.0098863	0.0017464	0.942088	DPP4	0	intronic	2.937	NA	4	0
2	11	rs16822665	rs2284871	T	C	162888055	0.329	8.62581e-08	-0.0093522	0.0017469	0.885276	DPP4	0	intronic	2.915	NA	4	0
2	11	rs16822665	rs2284870	C	T	162888727	0.3718	4.09261e-08	-0.0096461	0.001758	0.845803	DPP4	0	UTR3	2.343	NA	4	1
2	11	rs16822665	rs35635667	C	A	162889230	0.3509	NA	NA	NA	0.900986	DPP4	0	intronic	0.398	6	4	0
2	11	rs16822665	rs7608798	A	G	162890217	0.3429	2.27457e-08	-0.0097741	0.0017485	0.946429	DPP4	0	intronic	3.318	7	4	0
2	11	rs16822665	rs2160927	T	C	162891075	0.3429	2.25944e-08	-0.0097643	0.0017464	0.946429	DPP4	0	intronic	0.013	7	4	0
2	11	rs16822665	rs2111850	C	T	162891279	0.3429	1.60583e-08	-0.0098997	0.0017522	0.946429	DPP4	0	intronic	13.61	6	4	0
2	11	rs16822665	rs10930040	G	A	162894766	0.3449	3.05e-08	-0.009672	0.0017463	0.938304	DPP4	0	intronic	1.824	5	4	0
2	11	rs16822665	rs11900409	G	T	162900764	0.4135	3.20922e-06	-0.0082686	0.0017755	0.731786	DPP4	0	intronic	3.329	5	4	0
2	11	rs16822665	rs16822665	T	C	162901327	0.33	4.93742e-09	-0.01021	0.0017455	1	DPP4	0	intronic	4.55	4	4	0
2	11	rs16822665	rs12995636	A	G	162908664	0.3449	5.80631e-09	0.010156	0.0017443	0.921547	DPP4	0	intronic	0.684	6	4	0
2	12	rs7598246	rs1399957	G	A	172520642	0.4155	1.16172e-05	-0.007644	0.0017433	0.649451	DYNC1I2	23277	intergenic	1.827	6	5	1
2	12	rs7598246	rs1028127	C	T	172530036	0.4026	8.43918e-07	0.0086516	0.0017567	0.653525	DYNC1I2	13883	intergenic	0.409	7	7	1
2	12	rs7598246	rs12998411	C	G	172530707	0.4026	7.93963e-07	0.0086727	0.0017567	0.653525	DYNC1I2	13212	intergenic	0.608	2b	5	1
2	12	rs7598246	rs12052995	G	A	172537212	0.4056	6.35331e-07	0.0087503	0.001757	0.664521	DYNC1I2	6707	intergenic	8.328	5	5	1
2	12	rs7598246	rs17614941	C	T	172541378	0.4056	5.60661e-07	0.0087929	0.001757	0.664521	DYNC1I2	2541	intergenic	0.979	7	5	1
2	12	rs7598246	rs34242651	A	G	172553999	0.4076	3.28927e-07	0.0089709	0.0017569	0.664849	DYNC1I2	0	intronic	7.524	6	4	1
2	12	rs7598246	rs62184165	G	A	172558328	0.4046	3.91021e-07	0.0089141	0.001757	0.661714	DYNC1I2	0	intronic	0.056	6	4	1
2	12	rs7598246	rs34531723	C	A	172564094	0.4056	3.60081e-07	0.0089287	0.0017545	0.665824	DYNC1I2:ENSG00000268821	0	intronic:intronic	1.319	6	4	1
2	12	rs7598246	rs12997093	C	T	172564438	0.4036	3.26137e-07	0.0089614	0.0017545	0.658931	ENSG00000268821:DYNC1I2	0	intronic:intronic	1.408	2b	4	1
2	12	rs7598246	rs10930491	G	A	172569824	0.4046	3.71706e-07	0.0089254	0.0017559	0.661714	DYNC1I2	0	intronic	1.337	6	4	1
2	12	rs7598246	rs2292816	C	G	172586714	0.4066	3.72992e-07	0.0089301	0.0017571	0.660717	DYNC1I2	0	intronic	9.271	7	4	1
2	12	rs7598246	rs9789538	C	G	172618474	0.3996	2.6903e-07	0.0090409	0.0017575	0.651881	ENSG00000228389	11518	intergenic	0.417	6	4	1
2	12	rs7598246	rs6723259	C	A	172622527	0.4036	3.64586e-07	0.0089384	0.0017572	0.673463	ENSG00000228389	7465	intergenic	3.904	7	5	1
2	12	rs7598246	rs1607254	G	A	172626552	0.4036	5.58342e-07	0.0087838	0.0017549	0.673463	ENSG00000228389	3440	intergenic	6.716	6	5	1
2	12	rs7598246	rs11690807	A	G	172628120	0.4056	4.17734e-07	0.0088916	0.001757	0.672453	ENSG00000228389	1872	intergenic	4.973	3a	5	1
2	12	rs7598246	rs4510184	G	A	172630974	0.4056	NA	NA	NA	0.672453	ENSG00000228389	0	ncRNA_exonic	2.633	7	5	1
2	12	rs7598246	rs3770458	T	C	172651287	0.4046	3.6033e-07	0.0089358	0.0017559	0.676276	SLC25A12	0	intronic	1.417	NA	4	1
2	12	rs7598246	rs35854151	A	G	172657439	0.4046	5.05126e-07	0.0088216	0.0017557	0.676276	SLC25A12	0	intronic	5.298	5	4	1
2	12	rs7598246	rs17581284	T	C	172659376	0.4046	4.07568e-07	0.0088924	0.0017555	0.676276	SLC25A12	0	intronic	1.496	5	5	1
2	12	rs7598246	rs55908841	G	A	172660343	0.3688	NA	NA	NA	0.723039	SLC25A12	0	intronic	0.521	5	4	0
2	12	rs7598246	rs2271758	G	T	172701157	0.3986	4.10299e-07	0.0088783	0.0017532	0.691555	SLC25A12	0	intronic	8.408	6	4	1
2	12	rs7598246	rs59844139	A	C	172731983	0.4384	2.03002e-07	0.0091096	0.001753	0.776376	SLC25A12	0	intronic	6.021	6	4	1
2	12	rs7598246	rs62182403	A	G	172747182	0.4483	2.58285e-07	0.009027	0.0017522	0.831144	SLC25A12	0	intronic	8.498	6	4	1
2	12	rs7598246	rs4581870	A	T	172769907	0.4761	5.02343e-06	0.0079925	0.0017513	0.747086	HAT1	9051	intergenic	8.438	7	12	1
2	12	rs7598246	rs62182433	C	T	172777331	0.3201	4.95678e-06	0.0079741	0.0017462	0.633742	HAT1	1627	intergenic	2.417	7	5	1
2	12	rs7598246	rs62182436	T	C	172785163	0.4503	4.97966e-07	0.0088189	0.0017542	0.824224	HAT1	0	intronic	0.931	7	4	1
2	12	rs7598246	rs6731562	C	T	172798262	0.3211	4.07099e-06	-0.0080448	0.0017459	0.636866	HAT1	0	intronic	2.149	3a	4	1
2	12	rs7598246	rs2165934	A	G	172812339	0.3201	3.08248e-06	-0.0081452	0.0017459	0.633742	HAT1	0	intronic	1.56	7	2	1
2	12	rs7598246	rs4280427	A	G	172813218	0.4463	4.24815e-07	0.0088682	0.0017534	0.830703	HAT1	0	intronic	11.23	4	2	1
2	12	rs7598246	rs4280428	G	A	172813219	0.4473	NA	NA	NA	0.827985	HAT1	0	intronic	10.6	4	2	1
2	12	rs7598246	rs10201430	C	T	172813241	0.3211	3.6166e-06	-0.0080872	0.0017458	0.636866	HAT1	0	intronic	7.652	3a	2	1
2	12	rs7598246	rs7602037	A	G	172817794	0.3082	5.58599e-06	-0.0078866	0.0017365	0.602377	HAT1	0	intronic	8.416	4	4	1
2	12	rs7598246	rs11676438	A	G	172826668	0.4483	8.4918e-07	0.0086238	0.0017515	0.831892	HAT1	0	intronic	1.704	7	4	1
2	12	rs7598246	rs6433319	T	C	172830953	0.3201	5.74249e-06	-0.0079185	0.0017458	0.633742	HAT1	0	intronic	1.586	7	4	1
2	12	rs7598246	rs62183766	T	C	172833107	0.4483	4.53942e-07	0.0088423	0.0017527	0.838584	HAT1	0	intronic	0.274	6	4	1
2	12	rs7598246	rs13004237	G	A	172833139	0.3211	3.87258e-06	-0.0080552	0.0017442	0.635805	HAT1	0	intronic	0.31	6	4	1
2	12	rs7598246	rs62183769	C	A	172838074	0.4513	6.31539e-07	0.0087407	0.0017547	0.828215	HAT1	0	intronic	4.113	6	4	1
2	12	rs7598246	rs62183770	G	C	172838117	0.4513	6.08695e-07	0.0087518	0.0017544	0.828215	HAT1	0	intronic	0.543	6	4	1
2	12	rs7598246	rs10174055	T	C	172858214	0.3091	9.72523e-06	-0.0076698	0.001734	0.611057	METAP1D	6276	intergenic	2.626	7	5	1
2	12	rs7598246	rs7581072	T	C	172859849	0.3091	9.05733e-06	-0.0076958	0.0017338	0.611057	METAP1D	4641	intergenic	2.731	5	5	1
2	12	rs7598246	rs10166548	T	C	172861456	0.3091	8.93511e-06	-0.0077011	0.0017339	0.611057	METAP1D	3034	intergenic	0.196	6	5	1
2	12	rs7598246	rs55653103	C	T	172861816	0.4513	2.14981e-06	0.008306	0.0017527	0.850707	METAP1D	2674	intergenic	11.07	6	5	1
2	12	rs7598246	rs6729945	G	C	172864695	0.4513	1.82306e-06	0.0083637	0.0017526	0.850707	METAP1D	0	UTR5	9.822	4	1	1
2	12	rs7598246	rs6730085	A	C	172864845	0.4493	1.61399e-06	0.0084013	0.0017515	0.857625	METAP1D	0	UTR5	10.71	4	1	1
2	12	rs7598246	rs62183782	A	T	172865009	0.4523	1.40314e-06	0.008456	0.0017527	0.84792	METAP1D	0	intronic	10.49	4	1	1
2	12	rs7598246	rs62183783	G	A	172865775	0.4125	3.99669e-08	0.0096401	0.0017556	1	METAP1D	0	intronic	4.338	4	1	1
2	12	rs7598246	rs7584187	A	G	172866105	0.4493	1.0493e-06	0.0085566	0.0017526	0.857625	METAP1D	0	intronic	6.353	5	1	1
2	12	rs7598246	rs7557612	G	A	172866218	0.4493	1.04882e-06	0.0085567	0.0017526	0.857625	METAP1D	0	intronic	0.062	6	5	1
2	12	rs7598246	rs7557717	G	A	172866357	0.4493	9.73419e-07	0.0085819	0.0017525	0.857625	METAP1D	0	intronic	1.269	6	5	1
2	12	rs7598246	rs7598246	C	T	172866359	0.4125	3.61243e-08	0.0096707	0.0017555	1	METAP1D	0	intronic	1.006	6	5	1
2	12	rs7598246	rs62183784	G	A	172866696	0.4493	1.13162e-06	0.0085306	0.0017526	0.857625	METAP1D	0	intronic	13.66	5	5	1
2	12	rs7598246	rs62183785	A	G	172866976	0.4493	1.14762e-06	0.0085254	0.0017526	0.857625	METAP1D	0	intronic	6.871	7	5	1
2	12	rs7598246	rs62183800	T	C	172867273	0.4493	1.15239e-06	0.008524	0.0017526	0.857625	METAP1D	0	intronic	0.528	5	5	1
2	12	rs7598246	rs62183801	A	G	172867475	0.4493	1.14868e-06	0.0085251	0.0017526	0.857625	METAP1D	0	intronic	13.38	7	5	1
2	12	rs7598246	rs6718013	G	A	172869185	0.4493	1.19978e-06	0.00851	0.0017526	0.857625	METAP1D	0	intronic	11.67	6	5	1
2	12	rs7598246	rs6746701	A	G	172869255	0.4513	1.35394e-06	0.0084652	0.001752	0.851356	METAP1D	0	intronic	1.088	7	5	1
2	12	rs7598246	rs6733794	A	G	172871381	0.4493	1.3116e-06	0.0084796	0.0017527	0.857625	METAP1D	0	intronic	0.581	7	5	1
2	12	rs7598246	rs6737308	A	G	172872042	0.4115	4.75554e-08	0.0095866	0.0017557	0.995887	METAP1D	0	intronic	0.653	6	5	1
2	12	rs7598246	rs6433323	A	G	172873060	0.3847	7.06643e-06	0.0078533	0.0017484	0.662203	METAP1D	0	intronic	2.487	7	5	1
2	12	rs7598246	rs6715929	C	T	172877507	0.338	1.25516e-06	-0.0084508	0.0017436	0.699961	METAP1D	0	intronic	7.62	7	2	1
2	12	rs7598246	rs3063041	C	T	172882178	0.338	NA	NA	NA	0.699961	METAP1D	0	intronic	0.578	6	5	1
2	12	rs7598246	rs12991740	C	T	172885996	0.3827	NA	NA	NA	0.636287	METAP1D	0	intronic	0.365	6	5	1
2	12	rs7598246	rs11893458	A	T	172895001	0.4155	NA	NA	NA	0.69201	METAP1D	0	intronic	0.017	6	5	1
2	12	rs7598246	rs12052246	A	C	172895606	0.3917	1.1844e-06	0.0085114	0.0017519	0.632325	METAP1D	0	intronic	8.413	5	5	1
2	12	rs7598246	rs7591150	C	G	172897761	0.3897	1.6421e-06	0.0083915	0.0017507	0.625873	METAP1D	0	intronic	0.623	6	5	1
2	12	rs7598246	rs12987931	T	C	172900948	0.3857	1.5021e-07	0.0092234	0.001756	0.700174	METAP1D	0	intronic	4.131	6	5	1
2	12	rs7598246	rs112432457	A	G	172901195	0.3797	NA	NA	NA	0.698827	METAP1D	0	intronic	2.351	7	5	1
2	12	rs7598246	rs13015360	C	T	172901330	0.3638	2.15477e-07	0.0090631	0.0017477	0.664609	METAP1D	0	intronic	2.061	7	5	1
2	12	rs7598246	rs12989560	A	G	172901534	0.3738	8.5763e-08	0.0094133	0.001758	0.678419	METAP1D	0	intronic	2.846	7	5	1
2	12	rs7598246	rs13020884	G	T	172901699	0.3748	6.35477e-08	0.0095064	0.0017576	0.674223	METAP1D	0	intronic	1.162	4	5	1
2	12	rs7598246	rs7586556	C	G	172901887	0.3757	7.18621e-08	0.0094715	0.0017584	0.670044	METAP1D	0	intronic	0.435	5	5	1
2	12	rs7598246	rs62183819	T	G	172904520	0.3777	3.22404e-07	0.0089849	0.0017583	0.675208	METAP1D	0	intronic	0.117	5	5	1
2	12	rs7598246	rs1965160	A	G	172904758	0.3926	4.45246e-08	0.0096168	0.0017575	0.715235	METAP1D	0	intronic	0.27	NA	5	1
2	12	rs7598246	rs34737109	A	G	172905689	0.3668	NA	NA	NA	0.658502	METAP1D	0	intronic	2.506	7	5	1
2	12	rs7598246	rs34054371	C	G	172905817	0.3668	1.01088e-07	0.0093092	0.0017482	0.658502	METAP1D	0	intronic	0.386	7	5	1
2	12	rs7598246	rs1008151	A	G	172912098	0.3767	1.05584e-07	0.0093526	0.001759	0.672614	METAP1D	0	intronic	0.746	NA	5	1
2	12	rs7598246	rs788166	C	G	172915489	0.3668	9.91288e-08	0.0093169	0.0017485	0.658502	METAP1D	0	intronic	0.167	5	5	1
2	12	rs7598246	rs796839	C	A	172916214	0.3827	4.04483e-08	0.0095937	0.0017478	0.698842	METAP1D	0	intronic	4.499	6	5	1
2	12	rs7598246	rs2129475	G	A	172916772	0.3827	4.03738e-08	0.0095943	0.0017478	0.698842	METAP1D	0	intronic	16.66	7	2	1
2	12	rs7598246	rs788170	C	T	172919958	0.3668	1.23225e-07	0.0092476	0.0017485	0.658502	METAP1D	0	intronic	3.076	7	5	1
2	12	rs7598246	rs788171	C	T	172921832	0.3658	1.12021e-07	0.0092765	0.0017483	0.656087	METAP1D	0	intronic	3.864	5	5	1
2	12	rs7598246	rs6725971	T	C	172923983	0.3917	4.61318e-08	0.009599	0.0017562	0.712367	METAP1D	0	intronic	0.191	6	5	1
2	13	rs77998199	rs999549	C	G	174927433	0.1918	4.89328e-10	-0.010754	0.0017281	0.873457	OLA1	9742	intergenic	0.578	6	5	1
2	13	rs77998199	rs77998199	G	A	174928752	0.1988	1.96607e-10	0.010943	0.0017195	1	OLA1	8423	intergenic	0.412	2b	5	1
2	13	rs9636259	rs2358443	T	C	174930016	0.4473	2.23666e-07	0.0090456	0.0017467	0.671822	OLA1	7159	intergenic	9.713	NA	5	0
2	13	rs4131583	rs9287971	A	G	174931752	0.341	1.69824e-08	0.0099439	0.001763	0.918255	OLA1	5423	intergenic	3.465	4	5	1
2	13	rs4131583	rs2044470	T	C	174931837	0.2714	1.80094e-09	0.010448	0.001737	0.693478	OLA1	5338	intergenic	2.937	4	5	1
2	13	rs4131583	rs2044471	A	G	174931957	0.2714	2.30356e-09	0.010379	0.001737	0.693478	OLA1	5218	intergenic	1.247	6	5	1
2	13	rs4131583	rs7561190	T	C	174932562	0.2734	7.28618e-09	0.01006	0.0017391	0.697983	OLA1	4613	intergenic	0.587	6	5	1
2	13	rs4131583	rs11688834	T	C	174933420	0.2753	1.58818e-08	0.0098336	0.0017399	0.703833	OLA1	3755	intergenic	13.38	5	5	1
2	13	rs77998199	rs7582235	C	T	174934084	0.2008	5.65458e-10	0.010666	0.0017203	0.987487	OLA1	3091	intergenic	4.655	7	5	0
2	13	rs9636259	rs11682068	G	A	174935806	0.4304	4.32514e-07	0.0088461	0.0017503	0.735479	OLA1	1369	intergenic	1.223	5	5	0
2	13	rs9636259	rs11682078	G	A	174935842	0.4304	4.41164e-07	0.0088397	0.0017503	0.735479	OLA1	1333	intergenic	0.459	5	5	0
2	13	rs9636259	rs2884442	A	T	174936181	0.4284	3.91832e-07	0.0088717	0.0017488	0.726963	OLA1	0	downstream	5.521	4	5	0
2	13	rs77998199	rs35145102	A	G	174939083	0.2763	4.01976e-08	0.0096561	0.0017588	0.670669	OLA1	0	UTR3	6.301	7	4	0
2	13	rs9636259	rs6737629	T	C	174939168	0.4284	3.98199e-07	0.0088749	0.0017505	0.739992	OLA1	0	UTR3	5.037	6	4	0
2	13	rs9636259	rs10930632	A	G	174941439	0.4264	3.26287e-07	0.0089419	0.0017507	0.744578	OLA1	0	intronic	3.759	5	4	0
2	13	rs77998199	rs10930634	T	C	174942726	0.1998	4.57826e-10	0.01075	0.0017247	0.943744	OLA1	0	intronic	4.947	6	5	1
2	13	rs77998199	rs11675247	T	C	174943685	0.1998	4.57826e-10	0.01075	0.0017247	0.943744	OLA1	0	intronic	0.002	6	5	1
2	13	rs77998199	rs11558990	C	T	174946760	0.1998	4.31917e-10	0.010766	0.0017247	0.943744	OLA1	0	exonic	16.52	NA	4	1
2	13	rs9636259	rs11694601	G	A	174949358	0.4274	4.25598e-07	0.0088523	0.0017504	0.741682	OLA1	0	intronic	14.73	7	5	0
2	13	rs77998199	rs142397557	G	T	174951773	0.1978	NA	NA	NA	0.956074	OLA1	0	intronic	2.471	6	5	1
2	13	rs77998199	rs114899622	C	T	174954484	0.1978	5.42375e-10	0.010683	0.0017213	0.956074	OLA1	0	intronic	0.521	6	4	1
2	13	rs77998199	rs115330285	A	G	174955014	0.1998	4.15241e-10	0.010775	0.0017244	0.943744	OLA1	0	intronic	1.922	7	5	1
2	13	rs77998199	rs76103937	T	G	174955556	0.1978	5.48277e-10	0.010679	0.001721	0.956074	OLA1	0	intronic	1.648	6	5	1
2	13	rs4131583	rs935399	G	A	174956114	0.2763	1.42594e-08	0.010015	0.0017663	0.675161	OLA1	0	intronic	2.886	5	5	1
2	13	rs77998199	rs115634655	A	G	174956548	0.1978	4.09543e-10	0.010757	0.0017209	0.956074	OLA1	0	intronic	0.034	7	5	1
2	13	rs77998199	rs75517323	G	A	174957028	0.1978	4.08978e-10	0.010757	0.0017209	0.956074	OLA1	0	intronic	8.097	7	5	1
2	13	rs9636259	rs6433462	C	T	174957262	0.4274	2.42941e-07	0.0090412	0.0017511	0.742873	OLA1	0	intronic	0.223	6	5	0
2	13	rs9636259	rs9636259	T	C	174957796	0.3489	4.21502e-08	0.0095128	0.0017354	1	OLA1	0	intronic	7.4	6	4	1
2	13	rs9636259	rs12476833	T	C	174960254	0.4264	3.49865e-07	0.0089121	0.0017494	0.738601	OLA1	0	intronic	2.154	5	4	0
2	13	rs77998199	rs78164392	A	G	174960260	0.1978	3.76011e-10	0.01078	0.001721	0.956074	OLA1	0	intronic	2.521	5	4	1
2	13	rs9636259	rs2044469	G	A	174961488	0.3489	5.09683e-08	0.009453	0.0017351	1	OLA1	0	intronic	5.809	7	4	1
2	13	rs77998199	rs59237936	C	T	174961827	0.1978	3.79228e-10	0.010778	0.001721	0.956074	OLA1	0	intronic	0.275	7	4	1
2	13	rs9636259	rs75107833	G	A	174965611	0.3509	4.79513e-08	0.0094716	0.0017351	0.991423	OLA1	0	intronic	5.438	6	4	1
2	13	rs9636259	rs11681721	C	T	174969200	0.3509	2.97372e-07	0.0088925	0.001735	0.974305	OLA1	0	intronic	6.707	6	4	1
2	13	rs9636259	rs57679676	A	G	174971459	0.3559	3.11889e-07	0.0088749	0.0017347	0.962103	OLA1	0	intronic	0.013	6	2	1
2	13	rs9636259	rs59556168	A	G	174971471	0.3559	3.4898e-07	0.008838	0.0017346	0.962103	OLA1	0	intronic	0.021	7	2	1
2	13	rs77998199	rs79177087	T	G	174972044	0.1968	3.05703e-10	0.010838	0.0017213	0.949884	OLA1	0	intronic	9.006	5	4	1
2	13	rs9636259	rs935396	A	T	174972689	0.4274	1.66955e-07	0.009165	0.0017514	0.742873	OLA1	0	intronic	0.111	6	5	0
2	13	rs9636259	rs1867860	C	T	174973021	0.4274	1.84502e-07	0.0091325	0.0017514	0.742873	OLA1	0	intronic	13.7	6	5	0
2	13	rs9636259	rs17239055	G	A	174973726	0.4245	1.48354e-07	0.0092051	0.0017518	0.743211	OLA1	0	intronic	12.04	5	5	0
2	13	rs9636259	rs10930638	A	G	174974596	0.4284	1.8412e-07	0.0091335	0.0017515	0.739992	OLA1	0	intronic	1.732	6	5	0
2	13	rs77998199	rs80228644	T	C	174976024	0.1968	4.99919e-10	0.010705	0.0017213	0.949884	OLA1	0	intronic	1.923	7	4	1
2	13	rs9636259	rs935397	T	A	174976397	0.4284	2.47742e-07	0.0090358	0.0017513	0.739992	OLA1	0	intronic	0.434	7	4	0
2	13	rs77998199	rs75009093	A	T	174976581	0.1978	5.05941e-10	0.010703	0.0017214	0.956074	OLA1	0	intronic	5.07	6	4	1
2	13	rs77998199	rs77345174	C	T	174976833	0.1978	1.00972e-09	0.010517	0.0017218	0.956074	OLA1	0	intronic	9.846	7	4	1
2	13	rs77998199	rs17239265	C	T	174976987	0.1978	4.3471e-10	0.010743	0.0017213	0.956074	OLA1	0	intronic	2.088	5	4	1
2	13	rs77998199	rs78913467	A	G	174977107	0.1978	4.0059e-10	0.010765	0.0017213	0.956074	OLA1	0	intronic	5.831	5	4	1
2	13	rs9636259	rs2028890	T	C	174979709	0.4284	2.53338e-07	0.0090301	0.0017516	0.739992	OLA1	0	intronic	6.165	NA	4	0
2	13	rs9636259	rs17239377	A	C	174980339	0.4284	2.97303e-07	0.0089772	0.0017516	0.739992	OLA1	0	intronic	3.026	6	4	0
2	13	rs9636259	rs7573263	T	C	174980833	0.4284	2.51015e-07	0.0090327	0.0017515	0.739992	OLA1	0	intronic	0.729	7	4	1
2	13	rs77998199	rs76540327	C	T	174981351	0.1978	4.7076e-10	0.010722	0.0017214	0.956074	OLA1	0	intronic	12.13	5	4	1
2	13	rs9636259	rs34684057	G	A	174987794	0.3449	7.69662e-07	0.008577	0.0017352	0.94008	OLA1	0	intronic	11.85	6	4	1
2	13	rs77998199	rs10930639	T	C	174988189	0.1978	5.2517e-10	0.010689	0.0017207	0.956074	OLA1	0	intronic	7.455	5	4	1
2	13	rs77998199	rs75719921	C	T	174991914	0.1978	4.59304e-10	0.010726	0.0017209	0.956074	OLA1	0	intronic	0.378	7	4	1
2	13	rs77998199	rs79914545	T	C	174997585	0.1978	4.93969e-10	0.010705	0.0017207	0.956074	OLA1	0	intronic	1.676	7	5	1
2	13	rs9636259	rs10930641	G	A	175000711	0.4284	2.2444e-07	0.0090721	0.0017521	0.739992	OLA1	0	intronic	4.223	7	4	0
2	13	rs9636259	rs11684977	T	G	175000793	0.4284	2.2444e-07	0.0090722	0.0017521	0.739992	OLA1	0	intronic	0.748	7	4	0
2	13	rs77998199	rs78880283	T	C	175001043	0.1978	4.97164e-10	0.010703	0.0017208	0.956074	OLA1	0	intronic	1.659	5	4	1
2	13	rs9636259	rs35312569	C	T	175003640	0.4254	1.65539e-07	0.009176	0.001753	0.740294	OLA1	0	intronic	1.666	7	4	0
2	13	rs9636259	rs12614741	C	T	175007689	0.3489	1.06905e-06	0.0084647	0.0017351	0.931531	OLA1	0	intronic	6.04	6	5	1
2	13	rs9636259	rs10930642	C	A	175008424	0.4294	2.24337e-07	0.0090737	0.0017523	0.737123	OLA1	0	intronic	12.86	7	5	0
2	13	rs9636259	rs4972433	A	G	175012137	0.4254	1.82852e-07	0.0091434	0.0017529	0.739101	OLA1	0	intronic	2.129	6	5	0
2	13	rs77998199	rs141107817	A	G	175012853	0.1978	5.53988e-10	0.010674	0.0017208	0.956074	OLA1	0	intronic	5.382	7	5	1
2	13	rs9636259	rs7581106	A	G	175013013	0.3459	9.68278e-07	0.0085	0.0017354	0.935759	OLA1	0	intronic	1.886	6	5	1
2	13	rs9636259	rs11683795	C	T	175015859	0.3449	1.0937e-06	0.0084586	0.0017354	0.931624	OLA1	0	intronic	0.087	7	5	1
2	13	rs9636259	rs2119137	G	A	175017714	0.3499	8.63774e-07	0.0085442	0.0017365	0.935725	OLA1	0	intronic	6.324	4	2	1
2	13	rs77998199	rs77290880	A	C	175020992	0.2018	5.40256e-10	0.010705	0.0017246	0.932032	OLA1	0	intronic	2.26	2b	5	1
2	13	rs9636259	rs12475308	G	A	175021902	0.3499	8.33297e-07	0.0085588	0.0017369	0.92729	OLA1	0	intronic	12.54	4	5	1
2	13	rs77998199	rs77457056	A	G	175023386	0.2008	8.82064e-10	0.010549	0.001721	0.938022	OLA1	0	intronic	5.526	6	5	1
2	13	rs77998199	rs11682383	T	C	175024268	0.2008	8.16582e-10	0.01057	0.001721	0.938022	OLA1	0	intronic	8.029	7	5	1
2	13	rs9636259	rs71417459	G	T	175026890	0.3489	1.22857e-06	0.0084204	0.0017358	0.923123	OLA1	0	intronic	11.61	5	5	1
2	13	rs9636259	rs34784340	C	T	175026978	0.3499	8.37529e-07	0.0085573	0.001737	0.92729	OLA1	0	intronic	15.35	7	5	1
2	13	rs77998199	rs75132731	A	G	175030564	0.2008	1.11764e-09	0.010485	0.0017212	0.938022	OLA1	0	intronic	4.971	7	4	1
2	13	rs77998199	rs75428645	T	C	175031356	0.2008	1.02707e-09	0.010507	0.0017209	0.938022	OLA1	0	intronic	3.305	4	5	1
2	13	rs77998199	rs78735631	T	C	175031866	0.2008	9.12011e-10	0.010541	0.0017212	0.938022	OLA1	0	intronic	6.049	5	5	1
2	13	rs77998199	rs74346950	A	G	175035431	0.2008	1.21423e-09	0.010462	0.0017212	0.938022	OLA1	0	intronic	3.215	6	5	1
2	13	rs77998199	rs77724717	C	T	175040106	0.2008	9.94718e-10	0.010516	0.001721	0.938022	OLA1	0	intronic	3.22	5	5	1
2	13	rs77998199	rs76457036	G	T	175041684	0.2008	1.14288e-09	0.010477	0.0017209	0.938022	OLA1	0	intronic	10.86	4	5	1
2	13	rs77998199	rs76519710	C	G	175045949	0.2008	1.19454e-09	0.010465	0.0017209	0.938022	OLA1	0	intronic	0.469	5	4	1
2	13	rs9636259	rs12614861	T	G	175047184	0.3489	2.55564e-06	0.0081679	0.0017365	0.923123	OLA1	0	intronic	0.123	7	4	1
2	13	rs77998199	rs75778851	T	A	175051210	0.2008	1.15266e-09	0.010476	0.0017211	0.938022	OLA1	0	intronic	1.605	7	4	1
2	13	rs77998199	rs6729988	C	G	175052787	0.2008	9.37346e-10	0.010533	0.0017212	0.938022	OLA1	0	intronic	0.017	7	4	1
2	13	rs77998199	rs75606149	G	A	175053684	0.2008	1.17598e-09	0.010471	0.0017211	0.938022	OLA1	0	intronic	7.864	6	5	1
2	13	rs77998199	rs74426225	G	A	175053692	0.2008	1.01953e-09	0.010509	0.001721	0.938022	OLA1	0	intronic	11.22	6	5	1
2	13	rs77998199	rs77237375	T	C	175054736	0.2018	5.16297e-10	0.010719	0.001725	0.932032	OLA1	0	intronic	1.692	7	5	1
2	13	rs77998199	rs114205838	G	C	175055629	0.2008	1.06684e-09	0.010497	0.001721	0.938022	OLA1	0	intronic	1.88	6	5	1
2	13	rs77998199	rs10930650	T	C	175057564	0.2008	9.54553e-10	0.010528	0.0017212	0.938022	OLA1	0	intronic	0.235	3a	5	1
2	13	rs9636259	rs199750218	G	T	175062163	0.3529	NA	NA	NA	0.906326	OLA1	0	intronic	0.451	6	5	0
2	13	rs9636259	rs7578140	T	A	175064731	0.3419	2.43108e-06	0.008186	0.0017366	0.89298	OLA1	0	intronic	0.05	6	5	0
2	13	rs9636259	rs12992681	C	T	175065544	0.3489	2.3142e-06	0.0082033	0.0017365	0.923123	OLA1	0	intronic	10.41	7	4	1
2	13	rs77998199	rs11676867	T	C	175070177	0.2008	9.58959e-10	0.010527	0.0017212	0.938022	OLA1	0	intronic	6.205	7	5	1
2	13	rs77998199	rs75027449	T	C	175073147	0.2008	9.11171e-10	0.010541	0.0017212	0.938022	OLA1	0	intronic	0.391	6	5	1
2	13	rs77998199	rs149157627	A	T	175075935	0.2018	NA	NA	NA	0.932032	OLA1	0	intronic	0.834	5	2	0
2	13	rs77998199	rs78717261	G	T	175076326	0.2008	9.50386e-10	0.010529	0.0017211	0.938022	OLA1	0	intronic	12.06	6	1	1
2	13	rs9636259	rs12328930	C	T	175079125	0.4185	2.08257e-06	0.0082503	0.0017386	0.697806	OLA1	0	intronic	1.081	5	5	1
2	13	rs4131583	rs10186796	A	G	175079733	0.3529	4.97508e-09	0.010345	0.0017689	1	OLA1	0	intronic	0.403	7	4	1
2	13	rs77998199	rs145495932	T	C	175079756	0.2008	7.7732e-10	0.010584	0.0017211	0.938022	OLA1	0	intronic	0.004	7	4	1
2	13	rs4131583	rs4131583	G	T	175082308	0.3529	4.61955e-09	0.010374	0.0017702	1	OLA1	0	intronic	5.549	NA	1	1
2	13	rs4131583	rs78357038	G	T	175083734	0.3529	NA	NA	NA	1	OLA1	0	intronic	3.07	5	4	0
2	13	rs77998199	rs73037863	T	C	175084398	0.2038	1.9893e-09	0.010339	0.0017234	0.920761	OLA1	0	intronic	2.458	7	4	1
2	13	rs4131583	rs16862481	A	T	175085762	0.3519	1.45077e-08	0.010001	0.0017646	0.987478	OLA1	0	intronic	0.021	6	4	0
2	13	rs77998199	rs76431247	T	G	175088331	0.2008	2.69339e-09	0.010238	0.0017209	0.938022	OLA1	0	intronic	1.038	4	4	1
2	13	rs77998199	rs11691936	T	G	175090469	0.2008	2.26778e-09	0.010287	0.001721	0.938022	OLA1	0	intronic	0.156	7	4	1
2	13	rs4131583	rs11691915	T	C	175090564	0.3509	1.76848e-08	0.0099387	0.0017642	0.99168	OLA1	0	intronic	0.33	7	4	1
2	13	rs4131583	rs6741467	A	C	175091630	0.3509	1.69122e-08	0.0099521	0.0017642	0.99168	OLA1	0	intronic	3.916	6	4	1
2	13	rs77998199	rs11686695	A	C	175097356	0.2008	3.39547e-09	0.010172	0.0017207	0.938022	OLA1	0	intronic	3.65	6	5	1
2	13	rs77998199	rs1866640	A	G	175099649	0.1998	6.30957e-09	0.009993	0.0017204	0.931849	OLA1	0	intronic	2.262	4	5	1
2	13	rs77998199	rs1866642	G	C	175099860	0.2008	6.58567e-09	0.010039	0.0017305	0.925855	OLA1	0	intronic	0.929	5	4	1
2	13	rs9636259	rs1978885	C	T	175100603	0.4304	3.86278e-06	0.0080388	0.0017405	0.651575	OLA1	0	intronic	2.167	5	4	1
2	13	rs77998199	rs74869985	G	A	175101374	0.1998	6.13056e-09	0.010001	0.0017204	0.931849	OLA1	0	intronic	4.4	3a	4	1
2	13	rs9636259	rs13423652	C	T	175101687	0.4304	3.71621e-06	0.0080527	0.0017405	0.651575	OLA1	0	intronic	14.01	7	4	1
2	13	rs77998199	rs74559108	T	C	175104477	0.1998	NA	NA	NA	0.931849	OLA1	0	intronic	2.231	6	4	1
2	13	rs9636259	rs13424466	T	C	175105617	0.4304	4.24522e-06	0.0080057	0.0017407	0.651575	OLA1	0	intronic	6.245	5	4	1
2	13	rs77998199	rs78273711	G	A	175107363	0.2048	1.20531e-08	0.0098099	0.0017213	0.903046	OLA1	0	intronic	4.772	6	4	1
2	13	rs9636259	rs73037873	A	T	175107816	0.4344	5.53223e-06	0.007913	0.0017416	0.630567	OLA1	0	intronic	4.136	7	4	1
2	13	rs77998199	rs73037875	A	G	175111848	0.2058	8.45474e-09	0.0099165	0.0017218	0.897337	OLA1	0	UTR5	8.948	2b	1	1
2	13	rs9636259	rs10209474	T	C	175112764	0.4274	1.95704e-06	0.0082777	0.0017398	0.627389	OLA1	0	UTR5	12.2	2b	1	1
2	13	rs77998199	rs7583288	A	G	175113695	0.2058	7.43533e-09	0.0099606	0.001723	0.897337	OLA1	0	upstream	6.805	4	1	1
2	13	rs77998199	rs6717373	G	A	175117091	0.2087	1.44046e-08	0.0097662	0.0017228	0.880489	OLA1	3665	intergenic	0.107	6	5	1
2	13	rs77998199	rs6746204	A	G	175117192	0.2087	1.53109e-08	0.0097491	0.001723	0.880489	OLA1	3766	intergenic	3.703	5	5	1
2	13	rs9636259	rs10930656	G	C	175117880	0.4284	2.43837e-06	0.008211	0.0017421	0.631171	OLA1	4454	intergenic	0.451	5	5	1
2	13	rs77998199	rs7572344	T	A	175118475	0.2141	NA	NA	NA	0.847694	OLA1	5049	intergenic	0.56	NA	5	0
2	13	rs77998199	rs113634434	A	T	175119124	0.2078	8.34449e-09	0.009926	0.0017228	0.886059	OLA1	5698	intergenic	10.95	6	5	1
2	13	rs77998199	rs73037888	C	G	175123455	0.2097	8.86339e-09	0.0099152	0.001724	0.874964	ENSG00000201088	6151	intergenic	0.357	6	5	1
2	13	rs77998199	rs73037890	C	T	175123976	0.2097	1.77215e-08	0.0097111	0.001724	0.874964	ENSG00000201088	5630	intergenic	5.202	5	5	1
2	13	rs77998199	rs73037893	C	T	175125075	0.2097	1.76157e-08	0.0097078	0.0017231	0.874964	ENSG00000201088	4531	intergenic	2.631	2b	5	1
2	13	rs9636259	rs35204251	A	G	175126124	0.4294	4.30725e-06	0.0079982	0.0017402	0.628374	ENSG00000201088	3482	intergenic	2.535	4	5	1
2	13	rs77998199	rs80031872	G	A	175127560	0.2068	1.15664e-08	0.0098322	0.0017231	0.891675	ENSG00000201088	2046	intergenic	11.63	6	5	1
2	13	rs77998199	rs74718197	C	T	175131798	0.2087	2.08641e-08	0.0096551	0.0017226	0.880489	ENSG00000201088	2089	intergenic	18.27	7	2	1
2	13	rs77998199	rs11687678	A	C	175133282	0.2097	2.13157e-08	0.0096513	0.0017231	0.874964	ENSG00000201088	3573	intergenic	2.993	7	5	1
2	13	rs77998199	rs9646790	A	T	175133946	0.2087	2.14141e-08	0.009649	0.0017229	0.880489	ENSG00000201088	4237	intergenic	6.526	7	5	1
2	13	rs77998199	rs573481245	T	A	175134764	0.2028	NA	NA	NA	0.828849	ENSG00000201088	5055	intergenic	0.886	NA	5	0
2	13	rs77998199	rs538820935	T	C	175138364	0.2097	NA	NA	NA	0.874964	ENSG00000201088	8655	intergenic	2.346	NA	5	0
2	13	rs77998199	rs80202289	T	C	175138724	0.2097	NA	NA	NA	0.874964	ENSG00000201088	9015	intergenic	3.08	7	5	1
2	13	rs77998199	rs6710256	G	A	175140109	0.2097	1.93241e-08	0.0096855	0.001724	0.874964	ENSG00000201088	10400	intergenic	4.791	7	5	1
2	13	rs77998199	rs11675378	C	T	175140605	0.2087	2.04927e-08	0.0096681	0.001724	0.880489	ENSG00000201088	10896	intergenic	1.77	5	5	1
2	13	rs77998199	rs112586500	T	C	175143040	0.2087	2.32381e-08	0.0096234	0.0017227	0.880489	ENSG00000201088	13331	intergenic	0.19	7	5	1
2	13	rs77998199	rs74723458	A	G	175143352	0.2087	2.18223e-08	0.0096434	0.001723	0.880489	ENSG00000201088	13643	intergenic	0.915	7	5	1
2	13	rs77998199	rs9646791	A	C	175144371	0.2087	2.23049e-08	0.0096355	0.0017227	0.880489	ENSG00000201088	14662	intergenic	2.914	7	5	1
2	13	rs77998199	rs11676222	A	G	175145516	0.2087	2.51478e-08	0.0096011	0.001723	0.880489	ENSG00000201088	15807	intergenic	0.014	5	5	1
2	13	rs77998199	rs11695042	G	A	175150072	0.2107	3.63329e-08	0.0094892	0.0017228	0.869484	ENSG00000227180	13980	intergenic	2.528	7	5	1
2	13	rs77998199	rs143439363	A	G	175153974	0.2435	NA	NA	NA	0.730259	ENSG00000227180	10078	intergenic	4.209	6	9	1
2	14	rs1729412	rs13020196	T	G	201071942	0.3499	NA	NA	NA	0.75613	SPATS2L	98662	intergenic	0.114	6	5	0
2	14	rs1729412	rs1653301	G	A	201076401	0.3857	8.90841e-10	-0.010667	0.0017407	0.868053	SPATS2L	94203	intergenic	4.392	5	5	0
2	14	rs1729412	rs10445790	C	T	201078088	0.3887	1.14051e-09	0.010599	0.0017409	0.855847	SPATS2L	92516	intergenic	0.064	5	5	0
2	14	rs1729412	rs1729421	C	G	201080113	0.4195	2.23924e-10	-0.011067	0.0017444	1	SPATS2L	90491	intergenic	0.915	7	5	1
2	14	rs1729412	rs952530	T	C	201081745	0.4205	2.12961e-10	-0.011081	0.0017445	0.996008	SPATS2L	88859	intergenic	0.421	NA	5	1
2	14	rs1729412	rs1729412	C	T	201083598	0.4195	2.05353e-10	-0.011091	0.0017445	1	SPATS2L	87006	intergenic	4.028	4	2	1
2	14	rs1729412	rs13035874	A	G	201109553	0.329	8.42364e-10	0.010648	0.0017351	0.682023	SPATS2L	61051	intergenic	7.318	7	5	1
2	14	rs1729412	rs13022984	G	T	201116067	0.4264	NA	NA	NA	0.869145	SPATS2L	54537	intergenic	1.611	5	5	1
2	14	rs1729412	rs12469091	T	A	201124735	0.4284	6.20297e-10	0.010791	0.0017446	0.875603	SPATS2L	45869	intergenic	0.648	1f	5	1
2	14	rs1729412	rs4233994	C	G	201129211	0.4294	3.55304e-10	0.010945	0.0017448	0.879801	SPATS2L	41393	intergenic	0.062	6	5	1
2	14	rs1729412	rs4516415	G	C	201129608	0.4294	3.47616e-10	0.010951	0.0017448	0.879801	SPATS2L	40996	intergenic	1.152	5	5	1
2	14	rs1729412	rs13007517	T	C	201129729	0.4294	3.68468e-10	0.010934	0.0017448	0.879801	SPATS2L	40875	intergenic	1.558	5	5	1
2	14	rs1729412	rs12474914	G	A	201130210	0.4294	3.43005e-10	0.010954	0.0017448	0.879801	SPATS2L	40394	intergenic	9.088	7	5	1
2	14	rs4673912	rs11888462	T	G	201160499	0.4205	1.03395e-10	0.011291	0.0017472	0.858266	SPATS2L	10105	intergenic	1.438	5	5	1
2	14	rs4673912	rs295140	C	T	201160699	0.4205	1.30798e-10	-0.011217	0.0017454	0.858266	SPATS2L	9905	intergenic	1.248	5	5	1
2	14	rs4673912	rs1367856	A	T	201160739	0.4205	1.15878e-10	0.011264	0.0017477	0.858266	SPATS2L	9865	intergenic	5.608	5	5	1
2	14	rs4673912	rs1367857	C	T	201160765	0.4205	1.05293e-10	0.011287	0.0017474	0.858266	SPATS2L	9839	intergenic	2.046	5	5	1
2	14	rs4673905	rs1367858	T	C	201160771	0.338	7.29458e-11	0.011333	0.0017397	0.865048	SPATS2L	9833	intergenic	8.759	5	5	1
2	14	rs4673912	rs7559005	T	C	201161371	0.4195	1.21619e-10	0.011249	0.0017474	0.861521	SPATS2L	9233	intergenic	1.636	7	5	1
2	14	rs4673912	rs11696001	A	G	201162433	0.4195	1.7334e-10	0.011158	0.0017479	0.861521	SPATS2L	8171	intergenic	1.27	6	5	1
2	14	rs4673912	rs10931897	C	T	201162520	0.4195	2.08065e-10	0.011107	0.0017476	0.861521	SPATS2L	8084	intergenic	2.585	7	5	1
2	14	rs4673905	rs4673904	T	A	201163454	0.3767	9.84011e-12	0.011895	0.0017469	0.756959	SPATS2L	7150	intergenic	0.353	5	5	1
2	14	rs4673905	rs4673905	G	A	201163783	0.3121	3.98107e-12	0.012099	0.0017438	1	SPATS2L	6821	intergenic	7.043	5	5	1
2	14	rs4673912	rs4673906	T	G	201163812	0.4195	1.49383e-10	0.011195	0.0017475	0.861521	SPATS2L	6792	intergenic	0.388	5	5	1
2	14	rs4673912	rs4516413	C	T	201163920	0.4195	1.40605e-10	0.011211	0.0017475	0.861521	SPATS2L	6684	intergenic	2.696	7	5	1
2	14	rs4673912	rs13026151	A	T	201164570	0.4195	1.41482e-10	0.011209	0.0017475	0.861521	SPATS2L	6034	intergenic	10.05	6	5	1
2	14	rs4673912	rs13005573	C	G	201164696	0.4195	1.41416e-10	0.01121	0.0017477	0.861521	SPATS2L	5908	intergenic	0.266	6	5	1
2	14	rs4673912	rs7584810	A	G	201167772	0.4195	1.43847e-10	0.011207	0.0017479	0.861521	SPATS2L	2832	intergenic	6.827	4	2	1
2	14	rs4673905	rs6435048	T	C	201167854	0.34	1.40475e-10	0.011194	0.0017448	0.883889	SPATS2L	2750	intergenic	11.53	4	2	1
2	14	rs4673912	rs55677233	C	T	201168695	0.4195	1.39573e-10	0.011214	0.0017477	0.861521	SPATS2L	1909	intergenic	2.891	6	5	1
2	14	rs4673905	rs56326533	C	T	201168758	0.3757	6.65273e-12	0.011993	0.0017469	0.760262	SPATS2L	1846	intergenic	2.055	6	5	1
2	14	rs4673912	rs4673912	T	G	201168993	0.3797	4.52689e-09	0.010264	0.0017505	1	SPATS2L	1611	intergenic	0.637	6	5	1
2	14	rs4673912	rs1436161	T	A	201170582	0.3668	NA	NA	NA	0.678441	SPATS2L	0	upstream	1.444	2b	1	1
2	14	rs4673912	rs3739121	C	G	201171014	0.4195	1.29092e-10	0.011235	0.0017477	0.861521	SPATS2L	0	UTR5	6.168	2a	1	1
2	14	rs4673905	rs10931898	G	C	201171191	0.3757	5.72796e-12	0.01203	0.0017469	0.760262	SPATS2L	0	UTR5	18.69	2b	1	1
2	14	rs4673912	rs12614621	C	G	201171207	0.4195	1.21143e-10	0.011252	0.0017477	0.861521	SPATS2L	0	UTR5	17.13	4	1	1
2	14	rs4673912	rs12618057	C	T	201171355	0.4195	1.37689e-10	0.011216	0.0017475	0.861521	SPATS2L	0	intronic	4.324	2b	1	1
2	14	rs4673912	rs74853338	T	C	201171651	0.4195	1.29122e-10	0.011235	0.0017477	0.861521	SPATS2L	0	intronic	8.382	4	1	1
2	14	rs4673912	rs67190025	T	C	201172086	0.4195	1.31704e-10	0.011229	0.0017477	0.861521	SPATS2L	0	intronic	8.064	4	1	1
2	14	rs4673912	rs7580924	C	G	201172628	0.4195	1.29987e-10	0.011233	0.0017477	0.861521	SPATS2L	0	intronic	4.326	4	1	1
2	14	rs4673905	rs3769484	T	C	201172999	0.34	1.38293e-10	0.011198	0.0017448	0.883889	SPATS2L	0	intronic	5.821	NA	1	1
2	14	rs4673905	rs3769483	G	A	201173048	0.34	1.35894e-10	0.011202	0.0017447	0.883889	SPATS2L	0	intronic	16.05	NA	1	1
2	14	rs4673905	rs3769482	G	C	201173100	0.34	1.35925e-10	0.011202	0.0017448	0.883889	SPATS2L	0	intronic	14.46	2b	1	1
2	14	rs4673912	rs10931899	T	C	201176901	0.4185	1.35021e-10	0.011223	0.0017476	0.85691	SPATS2L	0	intronic	18.95	2b	2	1
2	14	rs4673912	rs10931900	C	T	201177193	0.4195	1.35145e-10	0.011223	0.0017477	0.853641	SPATS2L	0	intronic	2.829	5	4	1
2	14	rs4673912	rs7599609	A	G	201177653	0.4185	1.3555e-10	0.011222	0.0017477	0.85691	SPATS2L	0	intronic	6.021	5	4	1
2	14	rs4673905	rs3820888	C	T	201180023	0.3777	4.73151e-12	0.012077	0.0017469	0.755176	SPATS2L	0	intronic	3.702	NA	2	1
2	14	rs4673912	rs3769476	C	T	201181428	0.4185	1.17951e-10	0.01126	0.0017479	0.85691	SPATS2L	0	intronic	3.897	NA	2	1
2	14	rs4673912	rs7578220	G	A	201183701	0.4185	1.26824e-10	0.011239	0.0017477	0.85691	SPATS2L	0	intronic	4.499	4	2	1
2	14	rs4673905	rs7605146	A	G	201183888	0.3777	5.17607e-12	0.012054	0.0017468	0.755176	SPATS2L	0	intronic	0.407	4	2	1
2	14	rs4673912	rs13028959	A	C	201185919	0.4185	1.26561e-10	0.011241	0.0017479	0.85691	SPATS2L	0	intronic	6.747	5	2	1
2	14	rs4673905	rs1347551	T	C	201186572	0.34	1.29181e-10	0.011215	0.0017446	0.883889	SPATS2L	0	intronic	7.535	NA	4	1
2	14	rs4673912	rs1431766	G	A	201191034	0.4185	1.21507e-10	0.01125	0.0017476	0.85691	SPATS2L	0	intronic	3.8	NA	5	1
2	14	rs4673905	rs3769472	A	G	201193373	0.34	1.43913e-10	0.011186	0.0017445	0.883889	SPATS2L	0	intronic	3.691	NA	4	1
2	14	rs296790	rs11890234	T	C	201206706	0.4712	4.10866e-10	0.010922	0.0017474	0.793713	SPATS2L	0	intronic	1.438	7	4	1
2	14	rs296790	rs2033804	T	A	201222403	0.3926	2.42382e-09	0.010405	0.0017439	0.815376	SPATS2L	0	intronic	3.282	7	2	0
2	14	rs296790	rs1975584	C	A	201225797	0.3439	NA	NA	NA	0.645596	SPATS2L	0	intronic	2.861	NA	5	0
2	14	rs296790	rs3928462	C	A	201225810	0.3748	NA	NA	NA	0.75072	SPATS2L	0	intronic	0.742	6	2	0
2	14	rs296790	rs1975583	C	A	201225902	0.3897	1.59625e-09	0.01052	0.0017434	0.814893	SPATS2L	0	intronic	3.062	NA	2	0
2	14	rs296790	rs1369841	G	A	201227060	0.4046	2.19129e-09	0.010438	0.0017446	0.861424	SPATS2L	0	intronic	3.979	NA	4	0
2	14	rs296790	rs295129	A	G	201229473	0.4423	1.11045e-10	-0.011255	0.0017446	1	SPATS2L	0	intronic	2.985	NA	5	0
2	14	rs296790	rs6743157	T	C	201230076	0.4046	2.16322e-09	0.010442	0.0017446	0.861424	SPATS2L	0	intronic	2.985	5	5	0
2	14	rs296790	rs296790	G	C	201232862	0.4423	9.2045e-11	-0.011305	0.0017446	1	SPATS2L	0	intronic	5.964	5	4	0
2	14	rs296790	rs35417285	C	T	201233040	0.4016	2.1692e-09	0.010437	0.0017439	0.851376	SPATS2L	0	intronic	0.816	5	4	0
2	14	rs296790	rs295132	A	G	201233502	0.4414	1.01461e-10	-0.011279	0.0017447	0.995997	SPATS2L	0	intronic	1.305	NA	4	0
2	14	rs296790	rs3856513	A	G	201234216	0.4056	2.47685e-09	0.010404	0.0017447	0.856928	SPATS2L	0	intronic	3.757	NA	4	0
2	14	rs296790	rs3769456	T	C	201239002	0.4056	2.39111e-09	0.010414	0.0017447	0.856928	SPATS2L	0	intronic	6.485	NA	1	0
2	14	rs4673905	rs994280	G	A	201240086	0.3429	3.65595e-11	0.011534	0.0017428	0.724433	SPATS2L	0	intronic	2.965	NA	2	0
2	14	rs296790	rs12990174	A	G	201240305	0.4056	2.04174e-09	0.010458	0.0017446	0.856928	SPATS2L	0	intronic	3.079	5	5	0
2	14	rs296790	rs3754797	A	G	201242293	0.4056	2.55682e-09	0.010394	0.0017446	0.856928	SPATS2L	0	intronic	1.567	NA	2	0
2	14	rs296790	rs6708345	C	A	201244261	0.4423	9.62942e-07	0.0085312	0.0017413	0.686018	SPATS2L	0	intronic	0.676	5	1	0
3	15	rs1032501	rs4283589	C	G	23206359	0.4672	5.38766e-08	-0.0094849	0.0017442	0.730753	RPL24P7	30044	intergenic	0.011	5	5	0
3	15	rs1032501	rs6550743	T	C	23230299	0.3827	1.09901e-06	0.0084922	0.0017427	0.80752	UBE2E2-AS1	6262	intergenic	1.608	7	7	0
3	15	rs1032501	rs3732395	C	T	23234618	0.3827	1.18168e-06	0.0084674	0.0017427	0.80752	UBE2E2-AS1	1943	intergenic	4.426	7	5	0
3	15	rs1032501	rs1032500	T	C	23240658	0.3101	2.34369e-08	0.0097969	0.0017543	0.647569	UBE2E2-AS1	0	ncRNA_intronic	6.376	5	2	0
3	15	rs1032501	rs1032501	C	G	23240671	0.4036	1.1125e-08	0.010036	0.0017568	1	UBE2E2-AS1	0	ncRNA_intronic	0.566	5	2	0
3	15	rs1032501	rs9862557	G	A	23521061	0.325	1.37943e-07	0.0092597	0.0017577	0.634313	UBE2E2	0	intronic	2.991	5	4	1
4	16	rs1385253	rs7684366	T	C	152737856	0.2386	NA	NA	NA	0.983585	ENSG00000249184	15356	intergenic	1.148	6	5	1
4	16	rs1385253	rs2136959	G	A	152740233	0.2465	8.39267e-08	-0.0093602	0.0017468	0.951634	ENSG00000249184	17733	intergenic	0.688	7	9	1
4	16	rs1385253	rs2136961	G	A	152746079	0.3211	3.04229e-06	-0.0081472	0.0017453	0.690687	ENSG00000249184	23579	intergenic	1.825	NA	2	0
4	16	rs1385253	rs1385253	C	T	152749595	0.2416	1.66725e-08	-0.0098623	0.0017475	1	ENSG00000249184	27095	intergenic	0.02	7	14	1
4	16	rs361212	rs361199	A	T	152757511	0.2893	NA	NA	NA	0.932596	ENSG00000249184	35011	intergenic	0.446	6	5	1
4	16	rs361212	rs361202	C	T	152758408	0.2863	8.48399e-08	-0.0095773	0.0017879	0.95631	ENSG00000249184	35908	intergenic	6.903	7	5	1
4	16	rs361212	rs361203	A	T	152759653	0.2873	7.95243e-08	-0.0095955	0.0017874	0.961378	ENSG00000249184	37153	intergenic	0.099	7	5	0
4	16	rs361212	rs361204	G	T	152759741	0.2873	7.74997e-08	-0.0096037	0.0017874	0.961378	ENSG00000249184	37241	intergenic	1.657	7	5	1
4	16	rs361212	rs361205	T	C	152759751	0.3897	3.98382e-06	-0.0081402	0.0017649	0.605658	ENSG00000249184	37251	intergenic	0.545	6	5	1
4	16	rs361212	rs361206	A	C	152759925	0.3897	3.68214e-06	-0.0081689	0.0017649	0.605658	ENSG00000249184	37425	intergenic	0.412	6	5	1
4	16	rs361212	rs361207	G	A	152760129	0.3897	4.78079e-06	-0.0080734	0.001765	0.605658	ENSG00000249184	37629	intergenic	0.998	7	5	1
4	16	rs361212	rs10000280	C	G	152760983	0.3897	4.75335e-06	-0.0080754	0.0017649	0.605658	ENSG00000249184	38483	intergenic	0.048	7	5	1
4	16	rs361212	rs191716	T	C	152761365	0.3897	4.96821e-06	-0.0080593	0.001765	0.605658	ENSG00000249184	38865	intergenic	2.742	6	5	1
4	16	rs361212	rs361191	G	T	152761633	0.3877	5.28932e-06	-0.0080358	0.0017649	0.60383	ENSG00000249184	39133	intergenic	5.244	6	5	1
4	16	rs361212	rs361192	C	G	152762072	0.2873	8.53493e-08	-0.0095726	0.0017874	0.961378	ENSG00000249184	39572	intergenic	1.486	7	5	1
4	16	rs361212	rs361194	G	T	152762925	0.2932	NA	NA	NA	0.934591	ENSG00000249184	40425	intergenic	1.094	NA	5	1
4	16	rs361212	rs361195	G	C	152763021	0.2873	8.92689e-08	-0.0095573	0.0017873	0.961378	ENSG00000249184	40521	intergenic	3.07	6	5	1
4	16	rs361212	rs361196	C	T	152763180	0.2873	9.68947e-08	-0.009531	0.0017873	0.961378	ENSG00000249184	40680	intergenic	2.4	5	5	1
4	16	rs361212	rs361197	G	A	152763556	0.2873	7.77857e-08	-0.009602	0.0017873	0.961378	ENSG00000249184	41056	intergenic	2.091	5	5	1
4	16	rs361212	rs361212	C	T	152768951	0.2833	2.39221e-08	-0.0098301	0.0017613	1	ENSG00000249708	39744	intergenic	0.875	7	5	1
4	16	rs361212	rs361104	C	T	152774824	0.4006	0.000950605	-0.0058058	0.0017568	0.600986	ENSG00000249708	33871	intergenic	4.1	7	2	0
4	16	rs361212	rs189679	G	C	152775454	0.2217	2.43501e-08	-0.0097038	0.0017397	0.692403	ENSG00000249708	33241	intergenic	0.708	7	5	1
4	16	rs361212	rs361209	A	G	152776538	0.3032	0.000126328	-0.0067031	0.0017485	0.600054	ENSG00000249708	32157	intergenic	0.731	6	5	1
5	17	rs77917390	rs62371568	A	T	111101021	0.1083	0.000111506	-0.0066185	0.0017128	0.624828	NREP	0	intronic	4.747	7	5	0
5	17	rs77917390	rs62371570	C	T	111108996	0.1123	6.49083e-05	-0.0068663	0.001719	0.658699	NREP	0	intronic	6.273	6	5	0
5	17	rs77917390	rs62371571	G	T	111110597	0.1153	2.37575e-05	-0.0073008	0.0017275	0.659032	NREP	0	intronic	2.226	2b	2	0
5	17	rs77917390	rs77917390	A	T	111134058	0.09543	1.67958e-08	-0.0095862	0.001699	1	NREP	0	intronic	4.387	6	14	0
5	18	rs72791200	rs72791200	G	A	111984534	0.1382	1.40314e-09	0.010417	0.0017203	1	ENSG00000250358	16737	intergenic	6.583	7	5	0
5	18	rs7727738	rs6893949	A	T	111988946	0.4891	4.12098e-11	-0.011493	0.0017414	0.847772	ENSG00000250358	21149	intergenic	6.772	7	5	1
5	18	rs7727738	rs1441370	G	A	111994592	0.4642	2.59418e-09	-0.010364	0.0017402	0.767284	ENSG00000250358	26795	intergenic	0.933	NA	9	1
5	18	rs7727738	rs4705772	A	G	111995081	0.494	4.02717e-11	-0.011493	0.0017405	0.863485	ENSG00000250358	27284	intergenic	3.497	6	9	1
5	18	rs7727738	rs3919709	G	A	111995713	0.4642	2.28718e-09	-0.010399	0.0017401	0.767284	ENSG00000250358	27916	intergenic	0.073	NA	9	1
5	18	rs2952615	rs1899309	T	C	111996948	0.3877	1.56711e-09	-0.010494	0.0017381	0.738527	ENSG00000250358	29151	intergenic	1.436	NA	9	1
5	18	rs7727738	rs4705776	G	A	111997237	0.4642	NA	NA	NA	0.767284	ENSG00000250358	29440	intergenic	1.583	6	9	1
5	18	rs7727738	rs4705777	G	A	111997372	0.4483	2.09942e-07	-0.0090275	0.0017393	0.726483	ENSG00000250358	29575	intergenic	0.789	7	9	1
5	18	rs7727738	rs11749632	A	G	112006815	0.4871	1.7338e-11	0.01173	0.0017436	0.855571	APC	36380	intergenic	8.551	7	5	1
5	18	rs7727738	rs11241178	T	G	112008466	0.4871	2.05116e-11	0.011687	0.0017437	0.855571	APC	34729	intergenic	0.541	6	13	1
5	18	rs7727738	rs35935095	T	C	112008928	0.4871	2.07014e-11	0.011685	0.0017437	0.855571	APC	34267	intergenic	0.869	6	13	1
5	18	rs7727738	rs62363971	G	A	112009271	0.4891	2.94442e-11	0.011595	0.0017438	0.861881	APC	33924	intergenic	4.207	6	14	1
5	18	rs7727738	rs13166447	A	G	112010749	0.4791	4.12098e-11	0.011497	0.001742	0.833693	APC	32446	intergenic	1.255	7	14	1
5	18	rs56335290	rs11743328	C	T	112015555	0.1849	7.74105e-10	0.010623	0.0017273	0.773707	APC	27640	intergenic	1.48	6	5	1
5	18	rs7727738	rs17285505	G	C	112016995	0.4801	6.23735e-11	0.011389	0.0017419	0.962554	APC	26200	intergenic	1.428	6	5	1
5	18	rs2952615	rs10463641	T	C	112019878	0.3877	3.12392e-09	0.010306	0.0017394	0.740151	APC	23317	intergenic	6.521	5	2	1
5	18	rs2952615	rs10463642	A	C	112019879	0.3877	3.03948e-09	0.010314	0.0017394	0.740151	APC	23316	intergenic	9.264	5	2	1
5	18	rs7727738	rs7727738	G	A	112021399	0.4841	4.12098e-12	-0.012139	0.0017509	1	APC	21796	intergenic	15.97	7	5	1
5	18	rs7727738	rs12332692	C	T	112021979	0.4801	3.34195e-11	-0.011607	0.0017505	0.984942	APC	21216	intergenic	0.762	5	5	1
5	18	rs7727738	rs971517	G	C	112022255	0.4732	6.1235e-11	-0.011383	0.0017402	0.823789	APC	20940	intergenic	1.074	5	5	1
5	18	rs7727738	rs1441367	A	G	112023011	0.4761	3.64754e-11	-0.011584	0.0017503	0.970203	APC	20184	intergenic	1.216	NA	5	1
5	18	rs7727738	rs10477483	G	A	112023120	0.4781	3.1989e-11	-0.011618	0.0017504	0.977531	APC	20075	intergenic	2.808	4	5	1
5	18	rs7727738	rs10072068	A	G	112023761	0.4751	4.14954e-11	-0.011545	0.0017496	0.966645	APC	19434	intergenic	1.333	7	5	1
5	18	rs7727738	rs4705815	G	T	112024075	0.4761	7.32825e-11	-0.011356	0.0017432	0.832095	APC	19120	intergenic	5.863	7	5	1
5	18	rs7727738	rs4705816	T	G	112024150	0.4761	1.10332e-10	-0.011227	0.00174	0.832095	APC	19045	intergenic	0.394	5	5	1
5	18	rs7727738	rs13156251	C	T	112024192	0.4781	4.50817e-11	-0.011532	0.0017509	0.977531	APC	19003	intergenic	3.155	3a	5	1
5	18	rs7727738	rs13173990	G	C	112024251	0.4781	4.27563e-11	-0.011541	0.00175	0.977531	APC	18944	intergenic	1.85	3a	5	1
5	18	rs7727738	rs1866924	A	G	112026148	0.4742	7.32825e-11	-0.011401	0.0017502	0.955679	APC	17047	intergenic	1.204	7	5	1
5	18	rs7727738	rs12719151	C	T	112026480	0.4742	1.01461e-10	-0.011249	0.00174	0.827032	APC	16715	intergenic	2.906	5	5	1
5	18	rs7727738	rs1968557	T	C	112029044	0.4821	3.22849e-11	-0.011617	0.0017506	0.940263	APC	14151	intergenic	0.949	NA	5	1
5	18	rs7727738	rs1530256	G	T	112029106	0.4859	1.48252e-11	-0.01182	0.0017511	0.924498	APC	14089	intergenic	15.28	NA	5	1
5	18	rs7727738	rs953916	G	C	112029376	0.4871	1.09901e-11	-0.011901	0.0017519	0.848527	APC	13819	intergenic	0.075	7	5	1
5	18	rs7727738	rs2099810	G	A	112030173	0.4851	2.06063e-11	-0.011733	0.0017507	0.951225	APC	13022	intergenic	3.097	NA	5	1
5	18	rs2952615	rs10463643	T	C	112032675	0.3529	4.7665e-09	0.010169	0.0017367	0.806708	APC	10520	intergenic	2.012	5	5	1
5	18	rs7727738	rs10051624	C	G	112033044	0.492	2.71644e-11	-0.01166	0.0017504	0.919203	APC	10151	intergenic	0.488	5	1	1
5	18	rs7727738	rs2900066	T	A	112034353	0.4533	4.41876e-10	-0.01085	0.0017392	0.768693	APC	8842	intergenic	0.646	6	5	1
5	18	rs7727738	rs6594643	A	C	112034550	0.4533	3.75751e-10	-0.010891	0.0017388	0.768693	APC	8645	intergenic	0.847	5	5	1
5	18	rs7727738	rs6594644	G	T	112034596	0.4503	5.05243e-10	-0.010814	0.0017392	0.761493	APC	8599	intergenic	4.586	5	5	1
5	18	rs7727738	rs12658609	A	G	112035868	0.4911	3.68978e-11	-0.011582	0.0017506	0.922533	APC	7327	intergenic	1.139	7	5	1
5	18	rs56335290	rs56335290	A	C	112036634	0.2207	1.96789e-12	0.012204	0.0017343	1	APC	6561	intergenic	0.851	6	5	1
5	18	rs2952615	rs12513756	C	G	112038835	0.3678	NA	NA	NA	0.854332	APC	4360	intergenic	3.468	6	5	1
5	18	rs7727738	rs12513787	A	G	112038837	0.4871	4.79733e-11	-0.011515	0.0017507	0.908142	APC	4358	intergenic	1.84	6	5	1
5	18	rs7727738	rs12513804	C	G	112038904	0.4652	1.2314e-10	-0.011196	0.0017397	0.795502	APC	4291	intergenic	0.081	7	5	1
5	18	rs7727738	rs10213844	A	G	112041171	0.4891	4.23643e-11	-0.011542	0.0017499	0.901101	APC	2024	intergenic	4.739	7	5	1
5	18	rs2952615	rs1441375	C	T	112041594	0.3658	1.37721e-09	-0.010525	0.0017373	0.847684	APC	1601	intergenic	2.794	NA	5	1
5	18	rs7727738	rs6862050	G	A	112041841	0.4891	4.79733e-11	-0.01151	0.0017499	0.901101	APC	1354	intergenic	2.097	5	2	1
5	18	rs7727738	rs6894351	A	G	112045132	0.4692	3.64838e-10	-0.010911	0.0017407	0.732226	APC	0	intronic	6.704	5	1	1
5	18	rs2952615	rs1661036	G	A	112045587	0.3738	4.16677e-09	-0.010245	0.001743	0.896492	APC	0	intronic	1.99	NA	1	1
5	18	rs7727738	rs1465910	C	T	112045831	0.4692	3.28852e-10	-0.01094	0.0017407	0.732226	APC	0	intronic	1.908	NA	1	1
5	18	rs7727738	rs4705559	G	A	112050122	0.4841	7.31139e-11	-0.011404	0.0017506	0.860485	APC	0	intronic	12.61	7	3	1
5	18	rs7727738	rs7704618	G	T	112050465	0.4841	7.70903e-11	-0.011393	0.001751	0.860485	APC	0	intronic	5.021	7	3	1
5	18	rs2952615	rs1661035	C	G	112051828	0.3748	4.95564e-09	-0.010159	0.001737	0.899841	APC	0	intronic	0.145	7	5	1
5	18	rs7727738	rs6864688	T	C	112054086	0.493	9.2619e-10	-0.010656	0.0017406	0.801937	APC	0	intronic	11.38	6	2	1
5	18	rs7727738	rs9326862	T	A	112054547	0.4781	4.20243e-10	-0.010906	0.001746	0.749983	APC	0	intronic	2.767	5	2	1
5	18	rs7727738	rs9326863	T	G	112056360	0.494	1.06512e-10	-0.011311	0.0017516	0.793194	APC	0	intronic	9.029	5	2	1
5	18	rs7727738	rs10076641	C	T	112057100	0.4692	4.2063e-10	-0.010875	0.001741	0.732226	APC	0	intronic	2.152	7	5	1
5	18	rs7727738	rs11241182	C	A	112057425	0.494	3.04789e-11	-0.011617	0.0017484	0.750192	APC	0	intronic	6.36	7	5	1
5	18	rs7727738	rs6898133	G	C	112058410	0.4831	2.3025e-10	-0.011039	0.0017412	0.692942	APC	0	intronic	0.39	6	5	1
5	18	rs7727738	rs3846716	G	A	112059594	0.4861	2.60735e-10	-0.011006	0.0017412	0.687043	APC	0	intronic	2.399	7	5	1
5	18	rs7727738	rs10075281	A	G	112060242	0.4652	4.16869e-11	-0.011533	0.0017479	0.809738	APC	0	intronic	4.445	6	5	1
5	18	rs7727738	rs10075323	C	G	112060294	0.4652	3.53183e-11	-0.011576	0.0017478	0.809738	APC	0	intronic	0.455	6	5	1
5	18	rs7727738	rs10075377	T	G	112060421	0.4652	4.30527e-11	-0.011525	0.0017479	0.809738	APC	0	intronic	0.34	6	5	1
5	18	rs7727738	rs4705573	C	T	112060624	0.4672	6.63743e-11	-0.011418	0.0017488	0.815591	APC	0	intronic	3.511	7	4	1
5	18	rs7727738	rs11749701	G	C	112061448	0.4831	9.57194e-11	-0.011336	0.0017511	0.863753	APC	0	intronic	1.587	6	4	1
5	18	rs7727738	rs861674	T	A	112064475	0.4712	6.07295e-10	0.010768	0.00174	0.731167	APC	0	intronic	1.09	5	5	1
5	18	rs2952615	rs468179	T	C	112067142	0.3748	3.81944e-09	0.010235	0.0017371	0.899841	APC	0	intronic	1.072	5	4	1
5	18	rs7727738	rs2019720	G	A	112074269	0.4811	1.26532e-10	-0.011264	0.0017513	0.857236	APC	0	intronic	11.51	4	1	1
5	18	rs2952615	rs2020383	T	C	112074356	0.4722	3.37132e-10	-0.010937	0.0017413	0.725478	APC	0	intronic	1.205	5	1	1
5	18	rs7727738	rs1974786	G	C	112074722	0.4831	8.66962e-11	-0.011365	0.0017515	0.856672	APC	0	intronic	1.647	5	1	1
5	18	rs7727738	rs4705608	A	T	112077447	0.4831	8.18465e-11	-0.011378	0.0017512	0.863753	APC	0	intronic	7.749	5	2	1
5	18	rs7727738	rs10071425	G	T	112079882	0.4821	8.10961e-11	-0.011382	0.0017514	0.852873	APC	0	intronic	8.623	5	4	1
5	18	rs2952615	rs464002	A	G	112080728	0.3718	2.45867e-09	0.010362	0.0017374	0.889882	APC	0	intronic	0.953	7	4	1
5	18	rs7727738	rs6594646	G	A	112081924	0.4821	8.85116e-11	-0.011359	0.0017515	0.852873	APC	0	intronic	11.02	6	5	1
5	18	rs7727738	rs28373740	G	T	112085611	0.4801	NA	NA	NA	0.845312	APC	0	intronic	0.976	6	5	1
5	18	rs7727738	rs12518091	A	T	112086165	0.4841	1.01485e-10	-0.011321	0.0017511	0.859959	APC	0	intronic	4.258	6	5	1
5	18	rs7727738	rs11954856	G	T	112087327	0.4712	2.89401e-10	-0.010976	0.0017409	0.736637	APC	0	intronic	3.728	6	5	1
5	18	rs7727738	rs4099181	G	C	112091704	0.4712	2.82618e-10	-0.010986	0.0017415	0.736637	APC	0	intronic	1.425	7	4	1
5	18	rs7727738	rs4705486	G	T	112092402	0.4831	8.87156e-11	-0.011357	0.0017512	0.863753	APC	0	intronic	4.412	7	4	1
5	18	rs7727738	rs10073398	A	G	112094404	0.4732	3.20922e-10	-0.010953	0.0017418	0.730153	APC	0	intronic	0.331	7	4	1
5	18	rs7727738	rs6879057	T	C	112095140	0.4821	7.63836e-11	-0.01139	0.0017502	0.853422	APC	0	intronic	0.238	7	4	1
5	18	rs2952615	rs2546116	A	G	112095332	0.3648	4.57193e-09	0.01018	0.0017366	0.859385	APC	0	intronic	0.055	7	4	1
5	18	rs7727738	rs4705624	A	T	112095775	0.4831	1.23225e-10	-0.011269	0.0017511	0.856672	APC	0	intronic	16.36	6	4	1
5	18	rs7727738	rs2901844	T	C	112096626	0.4811	8.59014e-11	-0.011359	0.0017501	0.857236	APC	0	intronic	2.399	NA	4	1
5	18	rs7727738	rs28578275	A	G	112097234	0.4821	1.21731e-10	-0.011272	0.0017511	0.860477	APC	0	intronic	11.95	7	4	1
5	18	rs7727738	rs11241184	G	A	112097757	0.495	8.64968e-11	-0.011359	0.0017506	0.783082	APC	0	intronic	12.76	7	2	1
5	18	rs7727738	rs9647582	A	T	112098938	0.4831	1.06561e-10	-0.011308	0.0017512	0.863753	APC	0	intronic	4.066	5	4	1
5	18	rs7727738	rs9647583	G	A	112099028	0.4831	1.07127e-10	-0.011307	0.0017512	0.863753	APC	0	intronic	3.133	5	4	1
5	18	rs2952615	rs6867243	A	G	112100027	0.4722	4.7446e-10	-0.010839	0.0017406	0.730843	APC	0	intronic	2.678	7	4	1
5	18	rs2952615	rs12659119	T	G	112101457	0.4751	1.65577e-10	-0.011166	0.0017473	0.736635	APC	0	intronic	0.308	6	4	1
5	18	rs2952615	rs2464805	A	C	112101793	0.3777	3.4898e-09	-0.010263	0.0017374	0.910259	APC	0	intronic	0.725	NA	4	1
5	18	rs7727738	rs2431239	A	G	112103680	0.4831	2.06776e-10	-0.011133	0.0017515	0.85722	APC	0	intronic	2.298	NA	4	1
5	18	rs7727738	rs2546117	G	C	112103963	0.4821	2.51536e-10	-0.011074	0.0017505	0.861022	APC	0	intronic	0.044	7	4	1
5	18	rs7727738	rs35414976	G	A	112104297	0.4841	2.10378e-10	-0.011121	0.0017504	0.854003	APC	0	intronic	0.709	6	4	1
5	18	rs7727738	rs62364016	T	G	112105218	0.4771	NA	NA	NA	0.838366	APC	0	intronic	1.21	6	4	0
5	18	rs7727738	rs77552656	T	A	112105223	0.4831	NA	NA	NA	0.85722	APC	0	intronic	7.814	6	4	0
5	18	rs7727738	rs11241185	A	G	112107058	0.4821	1.43054e-10	-0.011231	0.0017514	0.861022	APC	0	intronic	5.984	7	4	1
5	18	rs7727738	rs2439589	T	C	112107726	0.4821	1.44145e-10	-0.011229	0.0017513	0.861022	APC	0	intronic	12.61	NA	1	1
5	18	rs7727738	rs2707763	C	T	112108865	0.494	1.85353e-10	-0.011159	0.0017508	0.773636	APC	0	intronic	7.156	6	4	1
5	18	rs7727738	rs1816769	C	G	112109779	0.4702	3.58014e-10	-0.010922	0.0017415	0.727961	APC	0	intronic	0.149	5	4	1
5	18	rs7727738	rs458906	C	G	112111866	0.4821	1.35925e-10	-0.011244	0.0017513	0.860477	APC	0	intronic	0.25	5	4	1
5	18	rs7727738	rs467033	T	A	112113527	0.4891	5.65979e-09	-0.010208	0.001752	0.835873	CBX3P3	0	ncRNA_exonic	2.995	5	4	1
5	18	rs7727738	rs396321	T	C	112113735	0.495	2.22382e-10	-0.011115	0.0017517	0.777126	CBX3P3	0	ncRNA_exonic	7.831	6	4	1
5	18	rs2952615	rs401908	C	T	112113760	0.3748	5.91153e-09	-0.010112	0.0017376	0.899841	CBX3P3	0	ncRNA_exonic	1.933	7	4	1
5	18	rs7727738	rs414098	A	G	112113772	0.4821	3.40957e-10	-0.010997	0.0017514	0.861022	CBX3P3	0	ncRNA_exonic	1.362	7	4	1
5	18	rs7727738	rs62364017	T	C	112116024	0.4861	1.50141e-10	-0.011172	0.0017441	0.763729	APC	0	intronic	5.349	7	4	1
5	18	rs2952615	rs35130225	A	G	112116069	0.4722	4.38127e-10	-0.010863	0.0017409	0.730843	APC	0	intronic	3.836	7	4	1
5	18	rs7727738	rs2289484	G	A	112116773	0.494	1.19152e-10	-0.011276	0.0017507	0.780372	APC	0	intronic	0.58	NA	4	1
5	18	rs7727738	rs2431242	A	G	112118195	0.4722	3.04299e-10	-0.010971	0.0017423	0.739855	APC	0	intronic	1.457	7	4	1
5	18	rs7727738	rs2431512	T	C	112118956	0.4841	1.07994e-10	-0.011305	0.0017512	0.860485	APC	0	intronic	0.439	7	4	1
5	18	rs7727738	rs2707765	C	G	112122532	0.4811	6.93426e-11	-0.011415	0.0017502	0.864295	APC	0	intronic	10.2	5	4	1
5	18	rs7727738	rs2431514	G	A	112131288	0.4761	1.58818e-10	-0.011214	0.001753	0.742474	APC	0	intronic	0.585	4	2	1
5	18	rs7727738	rs2464803	G	A	112131787	0.497	2.13845e-10	-0.011138	0.0017537	0.818848	APC	0	intronic	1.116	3a	2	1
5	18	rs7727738	rs518013	A	G	112135090	0.4722	2.59418e-10	-0.011062	0.0017499	0.831914	APC	0	intronic	9.729	7	4	1
5	18	rs7727738	rs2251913	G	A	112135737	0.4732	3.26663e-10	-0.011005	0.0017508	0.827988	APC	0	intronic	2.373	5	4	1
5	18	rs7727738	rs511906	G	A	112136204	0.4732	5.07224e-10	-0.010885	0.0017508	0.827988	APC	0	intronic	1.343	NA	4	1
5	18	rs2952615	rs529076	A	G	112138734	0.3777	4.49366e-09	-0.010191	0.0017376	0.910259	APC	0	intronic	2.797	7	4	1
5	18	rs2952615	rs2952615	C	G	112138888	0.3996	1.23339e-09	-0.010585	0.0017421	1	APC	0	intronic	0.144	7	4	1
5	18	rs7727738	rs2545158	G	A	112139745	0.4732	6.05899e-10	-0.010835	0.0017507	0.827988	APC	0	intronic	12.96	5	4	1
5	18	rs7727738	rs2431241	G	A	112144023	0.4722	6.29071e-10	-0.010825	0.0017507	0.811658	APC	0	intronic	0.913	NA	4	1
5	18	rs7727738	rs1914	T	A	112144444	0.4712	6.34454e-10	-0.010823	0.0017508	0.808003	APC	0	intronic	0.077	7	4	1
5	18	rs2952615	rs395266	C	T	112144954	0.3748	4.90908e-09	-0.01017	0.0017384	0.899841	APC	0	intronic	1.469	7	4	1
5	18	rs7727738	rs2546106	A	C	112145261	0.4702	9.07612e-10	-0.010722	0.0017505	0.825814	APC	0	intronic	1.837	7	4	1
5	18	rs7727738	rs390092	G	T	112146197	0.4732	6.92787e-10	-0.0108	0.0017509	0.821607	APC	0	intronic	1.677	NA	4	1
5	18	rs2952615	rs2545169	C	T	112149757	0.3748	4.65908e-09	-0.010177	0.0017369	0.892254	APC	0	intronic	1.871	NA	4	1
5	18	rs2952615	rs12656359	T	G	112151551	0.4881	1.08094e-09	-0.010621	0.001742	0.698367	APC	0	intronic	4.988	7	4	1
5	18	rs2952615	rs2431240	T	C	112152649	0.4881	1.29181e-09	-0.010572	0.0017421	0.698367	APC	0	intronic	1.82	NA	4	1
5	18	rs2952615	rs2545165	T	C	112153119	0.4006	1.42659e-09	-0.010528	0.0017395	0.996083	APC	0	intronic	3.154	NA	4	1
5	18	rs2952615	rs392907	G	A	112153495	0.3787	4.67197e-09	-0.010182	0.0017379	0.906061	APC	0	intronic	13.97	7	4	1
5	18	rs2952615	rs2545164	T	C	112153665	0.4006	1.56351e-09	-0.010502	0.0017394	0.996083	APC	0	intronic	4.136	6	4	1
5	18	rs2952615	rs563556	G	C	112153996	0.3787	5.31374e-09	-0.010148	0.0017384	0.906061	APC	0	intronic	1.711	7	4	1
5	18	rs2952615	rs464708	G	T	112154303	0.3797	3.34195e-09	-0.010287	0.0017393	0.909517	APC	0	intronic	3.289	7	4	1
5	18	rs2952615	rs2545163	G	C	112155504	0.3787	5.66239e-09	-0.010129	0.0017385	0.906061	APC	0	intronic	0.296	7	4	1
5	18	rs2952615	rs501250	C	G	112155793	0.3986	2.54273e-09	-0.010383	0.0017424	0.98828	APC	0	intronic	0.008	5	4	1
5	18	rs2952615	rs2545162	A	G	112158431	0.3708	7.08761e-09	-0.010089	0.0017428	0.870349	APC	0	intronic	1.318	5	4	1
5	18	rs7727738	rs2546107	G	A	112159470	0.4791	1.83443e-09	-0.01053	0.0017514	0.770887	APC	0	intronic	12.84	3a	4	1
5	18	rs2952615	rs2545159	G	A	112159562	0.3668	1.10357e-08	-0.0099281	0.0017375	0.864945	APC	0	intronic	2.922	NA	4	1
5	18	rs7727738	rs2546108	A	C	112161469	0.4811	1.49486e-10	-0.011213	0.0017504	0.87041	APC	0	intronic	9.695	6	4	1
5	18	rs2952615	rs2546109	C	A	112162299	0.3429	NA	NA	NA	0.646378	APC	0	intronic	7.746	6	4	0
5	18	rs2952615	rs2546110	G	A	112162413	0.4205	3.13906e-09	-0.010427	0.00176	0.765751	APC	0	intronic	7.71	7	4	1
5	18	rs2952615	rs2229992	C	T	112162854	0.4205	3.77746e-09	-0.01036	0.0017578	0.765751	APC	0	exonic	1.77	7	4	1
5	18	rs2952615	rs187075	T	C	112164238	0.3797	3.25987e-09	-0.010314	0.0017428	0.909517	APC:ENSG00000258864	0	intronic:intronic	3.876	7	4	1
5	18	rs2952615	rs351771	A	G	112164561	0.4006	1.70687e-09	-0.010496	0.0017424	0.996083	APC:ENSG00000258864	0	exonic:exonic	14.8	NA	4	1
5	18	rs7727738	rs351772	A	G	112164862	0.4801	1.84969e-10	-0.011152	0.0017497	0.860521	APC:ENSG00000258864	0	intronic:intronic	0.403	7	4	1
5	18	rs7727738	rs2253987	A	G	112166862	0.4801	3.07468e-10	-0.011026	0.0017516	0.860521	ENSG00000258864:APC	0	intronic:intronic	0.287	NA	4	1
5	18	rs7727738	rs544243	G	T	112167130	0.4513	1.93553e-09	-0.010451	0.0017409	0.660087	ENSG00000258864:APC	0	intronic:intronic	0.666	7	4	1
5	18	rs7727738	rs548710	C	T	112167587	0.4821	2.98951e-10	-0.011034	0.0017515	0.8742	APC:ENSG00000258864	0	intronic:intronic	1.726	5	4	1
5	18	rs2952615	rs569940	T	C	112167821	0.4751	5.3827e-10	-0.010814	0.0017421	0.735555	ENSG00000258864:APC	0	intronic:intronic	6.478	6	4	1
5	18	rs2952615	rs2909958	G	C	112167941	0.4751	5.61565e-10	-0.010803	0.0017421	0.735555	APC:ENSG00000258864	0	intronic:intronic	1.26	5	4	1
5	18	rs2952615	rs2909786	G	A	112168065	0.4742	4.92493e-10	-0.010839	0.0017421	0.73178	APC:ENSG00000258864	0	intronic:intronic	1.789	5	4	1
5	18	rs2952615	rs2909787	C	G	112168130	0.4751	7.30971e-10	-0.010727	0.0017415	0.735555	ENSG00000258864:APC	0	intronic:intronic	0.173	5	4	1
5	18	rs2952615	rs383256	C	T	112169136	0.4751	4.9877e-10	-0.01084	0.0017429	0.735555	APC:ENSG00000258864	0	intronic:intronic	1.617	NA	4	1
5	18	rs2952615	rs2546111	A	T	112169525	0.3787	7.2144e-09	-0.010059	0.0017385	0.906061	ENSG00000258864:APC	0	intronic:intronic	3.748	6	4	1
5	18	rs2952615	rs411356	A	G	112172219	0.3797	3.36899e-09	-0.010304	0.0017427	0.901881	ENSG00000258864:APC	0	intronic:intronic	5.589	NA	4	1
5	18	rs2952615	rs1966477	T	G	112172786	0.3797	3.54895e-09	-0.010289	0.0017428	0.901881	ENSG00000258864:APC	0	intronic:intronic	0.965	NA	4	1
5	18	rs2952615	rs1966476	C	T	112172930	0.4225	3.39391e-09	-0.010391	0.0017578	0.758823	ENSG00000258864:APC	0	intronic:intronic	4.376	NA	4	1
5	18	rs2952615	rs41115	A	G	112175770	0.4006	1.70177e-09	-0.010496	0.0017423	0.988252	APC	0	exonic	8.667	NA	4	1
5	18	rs2952615	rs42427	A	G	112176325	0.3976	1.9893e-09	-0.010454	0.0017427	0.968729	APC	0	exonic	1.298	7	4	1
5	18	rs2952615	rs866006	G	T	112176559	0.3996	1.75065e-09	-0.010489	0.0017425	0.992164	APC	0	exonic	0.002	NA	4	1
5	18	rs56335290	rs459552	A	T	112176756	0.2346	3.04789e-11	-0.011523	0.0017343	0.891135	APC	0	exonic	13.24	7	4	1
5	18	rs2952615	rs465899	A	G	112177171	0.4006	2.05494e-09	-0.010442	0.0017422	0.988252	APC	0	exonic	7.963	NA	4	1
5	18	rs7727738	rs41116	C	T	112180921	0.4841	1.28529e-10	-0.01126	0.0017514	0.873749	APC	0	UTR3	9.593	6	4	1
5	18	rs7727738	rs448475	G	C	112181379	0.4841	1.36427e-10	-0.011238	0.0017504	0.873749	APC	0	UTR3	2.571	7	5	1
5	18	rs2952615	rs397768	A	G	112181576	0.3797	4.79292e-09	-0.010187	0.0017401	0.909726	APC	0	UTR3	5.111	5	5	1
5	18	rs2952615	rs433429	T	A	112182232	0.3787	4.13428e-09	-0.01023	0.0017401	0.906061	ENSG00000258864	0	intronic	6.063	6	5	1
5	18	rs2952615	rs386830	A	G	112182379	0.3787	4.3441e-09	-0.010215	0.0017401	0.906061	ENSG00000258864	0	intronic	4.663	NA	5	1
5	18	rs2952615	rs448162	G	A	112182691	0.3917	1.51356e-07	-0.0092422	0.0017601	0.653591	ENSG00000258864	0	intronic	3.36	5	5	1
5	18	rs7727738	rs2546112	G	A	112183157	0.4861	1.50973e-08	-0.0099275	0.0017538	0.816585	ENSG00000258864	0	intronic	1.618	3a	5	1
5	18	rs7727738	rs2545155	C	T	112184490	0.497	9.08239e-08	-0.0093433	0.0017483	0.774236	ENSG00000258864	0	intronic	2.153	5	5	1
5	18	rs2952615	rs565453	C	A	112185393	0.3728	7.59626e-08	-0.0093503	0.0017391	0.8636	ENSG00000258864	0	intronic	1.083	6	5	1
5	18	rs2952615	rs565603	G	A	112185451	0.3718	7.13674e-08	-0.0093695	0.001739	0.860413	ENSG00000258864	0	intronic	4.599	6	5	1
5	18	rs2952615	rs497844	G	A	112185491	0.3728	7.67008e-08	-0.0093472	0.0017391	0.8636	ENSG00000258864	0	intronic	4.841	NA	5	1
5	18	rs7727738	rs566419	C	A	112185513	0.4881	1.04833e-08	-0.010034	0.0017534	0.788327	ENSG00000258864	0	intronic	0.317	7	5	1
5	18	rs2952615	rs481789	A	C	112186064	0.3738	6.40619e-08	-0.0093908	0.0017367	0.85985	ENSG00000258864	0	intronic	2.964	7	5	1
5	18	rs151980	rs395858	A	G	112187356	0.4781	1.36647e-08	-0.0099346	0.0017498	0.786535	ENSG00000258864	0	intronic	0.983	7	5	1
5	18	rs151980	rs382427	G	A	112187436	0.4712	7.33669e-09	-0.010142	0.0017537	0.766075	ENSG00000258864	0	intronic	4.43	NA	5	1
5	18	rs151980	rs373059	A	G	112188437	0.4781	1.72624e-08	-0.0098762	0.0017519	0.786535	ENSG00000258864	0	intronic	7.182	NA	14	1
5	18	rs2952615	rs454968	C	T	112188456	0.3847	2.51073e-08	-0.0097838	0.0017557	0.686092	ENSG00000258864	0	intronic	4.063	NA	14	1
5	18	rs2952615	rs434157	A	G	112191642	0.337	1.01555e-07	-0.0092368	0.0017349	0.714667	ENSG00000258864	0	intronic	7.499	5	5	1
5	18	rs151980	rs374613	G	A	112192072	0.4722	7.34514e-09	-0.010127	0.0017512	0.785488	ENSG00000258864	0	intronic	1.374	NA	5	1
5	18	rs2952615	rs580237	C	A	112194032	0.334	9.03233e-08	-0.0092884	0.0017377	0.721272	ENSG00000258864	0	intronic	4.677	7	5	1
5	18	rs2952615	rs429427	G	A	112194693	0.3569	1.63042e-07	-0.0091258	0.0017425	0.636407	ENSG00000258864	0	intronic	0.139	NA	5	1
5	18	rs2952615	rs380144	G	A	112195992	0.333	1.88322e-07	-0.0090397	0.0017349	0.711034	ENSG00000258864	0	intronic	2.535	6	5	1
5	18	rs151980	rs460137	C	A	112196949	0.4692	7.77857e-09	-0.010112	0.0017515	0.801725	SRP19	0	UTR5	5.723	4	1	1
5	18	rs2952615	rs712668	G	T	112197637	0.339	1.11045e-07	-0.0092344	0.0017398	0.705653	SRP19:ENSG00000258864:ENSG00000272869	0	intronic:intronic:intronic	5.987	NA	1	1
5	18	rs2952615	rs431287	T	A	112197986	0.34	7.79112e-08	-0.0093615	0.0017426	0.708934	SRP19:ENSG00000272869:ENSG00000258864	0	intronic:intronic:intronic	0.736	3a	1	1
5	18	rs2952615	rs372492	G	A	112198015	0.34	7.92501e-08	-0.0093525	0.001742	0.708934	ENSG00000272869:SRP19:ENSG00000258864	0	intronic:intronic:intronic	3.036	NA	1	1
5	18	rs2952615	rs351770	A	C	112199199	0.3668	1.26911e-08	-0.010002	0.0017577	0.757362	ENSG00000258864:ENSG00000272869:SRP19	0	intronic:intronic:intronic	4.531	NA	2	1
5	18	rs2952615	rs351769	T	C	112199974	0.339	6.79516e-08	-0.0094615	0.0017532	0.69423	SRP19:ENSG00000258864:ENSG00000272869	0	intronic:intronic:intronic	4.362	NA	1	1
5	18	rs151980	rs351768	A	T	112200028	0.4662	7.35529e-09	-0.010145	0.0017543	0.812088	ENSG00000272869:ENSG00000258864:SRP19	0	intronic:intronic:intronic	4.729	7	3	1
5	18	rs2952615	rs351767	G	A	112200098	0.3419	2.13403e-08	-0.0098441	0.0017576	0.681989	ENSG00000272869:ENSG00000258864:SRP19	0	intronic:intronic:intronic	4.045	NA	3	1
5	18	rs2952615	rs495794	G	A	112201094	0.3419	2.18374e-08	-0.0098348	0.0017572	0.681989	ENSG00000258864:SRP19:ENSG00000272869	0	intronic:intronic:intronic	2.246	3a	4	1
5	18	rs2952615	rs463229	A	G	112201284	0.34	8.5428e-08	-0.0093178	0.0017399	0.708934	ENSG00000272869:SRP19:ENSG00000258864	0	intronic:intronic:intronic	0.223	NA	4	1
5	18	rs2952615	rs428181	G	T	112201935	0.34	NA	NA	NA	0.708934	ENSG00000258864:ENSG00000272869:SRP19	0	intronic:intronic:intronic	0.466	7	4	1
5	18	rs2952615	rs442507	T	C	112201936	0.34	NA	NA	NA	0.708934	ENSG00000258864:SRP19:ENSG00000272869	0	intronic:intronic:intronic	1.406	7	4	1
5	18	rs2952615	rs7213	A	T	112203564	0.3459	1.69473e-08	-0.0099294	0.0017603	0.685078	SRP19	0	UTR3	16.89	6	4	1
5	18	rs151980	rs2545170	A	G	112204170	0.4642	3.77833e-09	-0.010329	0.0017524	0.80304	SRP19	0	UTR3	0.077	NA	4	1
5	18	rs56335290	rs2545751	T	C	112204207	0.2008	2.76312e-09	-0.010281	0.0017293	0.644604	SRP19	0	UTR3	4.565	7	4	1
5	18	rs151980	rs368575	A	C	112204896	0.4672	1.10205e-08	-0.010024	0.0017542	0.815477	SRP19	0	UTR3	7.434	NA	4	1
5	18	rs2952615	rs439456	C	G	112205207	0.3598	2.86352e-08	-0.0097599	0.0017586	0.764855	SRP19	0	UTR3	0.246	5	4	1
5	18	rs2952615	rs438252	C	A	112205298	0.3458	7.78037e-08	-0.0093243	0.0017356	0.695223	SRP19	0	UTR3	1.648	NA	4	1
5	18	rs151980	rs410701	A	G	112206416	0.4702	1.49279e-08	-0.0099254	0.0017528	0.825854	ENSG00000272869	0	intronic	8.464	6	4	1
5	18	rs2952615	rs460301	A	G	112206816	0.3419	8.8308e-08	-0.0093565	0.0017491	0.701653	ENSG00000272869	0	intronic	3.87	NA	4	1
5	18	rs2952615	rs2909904	C	G	112207007	0.34	8.1358e-08	-0.0093355	0.0017403	0.708934	ENSG00000272869	0	intronic	0.048	5	4	1
5	18	rs2952615	rs382260	T	C	112210344	0.34	6.39882e-08	-0.0094235	0.0017427	0.708934	ENSG00000272869	0	intronic	2.905	5	4	1
5	18	rs151980	rs419155	T	A	112210415	0.4702	1.18741e-08	-0.010001	0.001754	0.825854	ENSG00000272869	0	intronic	1.566	7	4	1
5	18	rs151980	rs448613	C	T	112210966	0.4702	1.19344e-08	-0.0099937	0.001753	0.825854	ENSG00000272869	0	intronic	2.585	6	4	1
5	18	rs151980	rs712670	A	G	112211610	0.4702	1.26357e-08	-0.0099763	0.001753	0.825854	ENSG00000272869	0	intronic	1.11	2b	4	1
5	18	rs2952615	rs712671	C	T	112211786	0.3618	4.62168e-08	-0.0095784	0.0017525	0.77045	ENSG00000272869	0	intronic	0.212	4	4	1
5	18	rs151980	rs3317	A	G	112212151	0.4702	1.30317e-08	-0.0099726	0.0017539	0.825854	REEP5	0	UTR3	4.167	5	4	1
5	18	rs2952615	rs9011	A	G	112212608	0.3419	8.80238e-08	-0.0093758	0.0017525	0.701653	REEP5	0	UTR3	5.535	NA	4	1
5	18	rs2952615	rs2545167	T	G	112213071	0.34	6.54787e-08	-0.0094162	0.0017427	0.708934	REEP5	0	UTR3	1.994	NA	4	1
5	18	rs2952615	rs2545166	G	C	112213805	0.34	6.37236e-08	-0.0094268	0.0017431	0.708934	REEP5	0	UTR3	7.259	4	4	1
5	18	rs2952615	rs514763	T	C	112215156	0.3439	1.73221e-08	0.0099216	0.0017601	0.684304	ENSG00000272869:REEP5	0	intronic:intronic	2.53	NA	4	1
5	18	rs151980	rs456531	C	T	112216189	0.4702	1.2782e-08	0.0099726	0.0017529	0.825854	REEP5:ENSG00000272869	0	intronic:intronic	2.858	NA	4	1
5	18	rs2952615	rs419632	T	C	112216389	0.3429	7.10068e-08	0.0094468	0.0017531	0.697258	REEP5:ENSG00000272869	0	intronic:intronic	5.146	NA	4	1
5	18	rs2952615	rs35726351	A	G	112217737	0.3429	5.56929e-08	0.009523	0.0017531	0.697258	REEP5:ENSG00000272869	0	intronic:intronic	0.767	7	4	1
5	18	rs151980	rs67293732	C	G	112217964	0.4642	5.19278e-09	0.010236	0.0017524	0.80304	ENSG00000272869:REEP5	0	intronic:intronic	0.628	6	4	1
5	18	rs2952615	rs1093611	T	A	112218476	0.3738	2.0611e-08	0.009864	0.0017592	0.7306	ENSG00000272869:REEP5	0	intronic:intronic	1.929	7	4	1
5	18	rs2952615	rs1093677	C	T	112218700	0.341	5.49414e-08	0.0094727	0.001743	0.704475	REEP5:ENSG00000272869	0	intronic:intronic	1.592	7	4	1
5	18	rs2952615	rs1069061	G	A	112218982	0.339	1.03252e-07	0.009231	0.0017348	0.699458	REEP5:ENSG00000272869	0	intronic:intronic	7.797	5	4	1
5	18	rs151980	rs818797	A	G	112219140	0.4632	5.45255e-09	0.010222	0.0017524	0.799694	ENSG00000272869:REEP5	0	intronic:intronic	3.39	NA	4	1
5	18	rs151980	rs818430	C	T	112219961	0.4702	1.07127e-08	0.010025	0.0017528	0.825854	REEP5:ENSG00000272869	0	intronic:intronic	2.598	NA	4	1
5	18	rs2952615	rs818429	C	T	112220534	0.3678	1.15213e-08	0.010073	0.0017652	0.753243	REEP5:ENSG00000272869	0	intronic:intronic	3.334	NA	4	1
5	18	rs2952615	rs864682	T	C	112220556	0.3429	6.90876e-08	0.0094318	0.0017487	0.697258	REEP5:ENSG00000272869	0	intronic:intronic	2.008	NA	4	1
5	18	rs151980	rs818428	T	A	112220613	0.4702	1.07895e-08	0.010023	0.0017528	0.825854	ENSG00000272869:REEP5	0	intronic:intronic	1.901	5	4	1
5	18	rs2952615	rs818427	T	C	112221869	0.34	1.32648e-07	0.0091551	0.0017355	0.701956	ENSG00000272869:REEP5	0	intronic:intronic	9.075	NA	4	1
5	18	rs2952615	rs712662	G	C	112222694	0.3638	7.96526e-08	0.0093857	0.0017484	0.769085	REEP5:ENSG00000272869	0	intronic:intronic	1.327	5	2	1
5	18	rs2952615	rs712663	C	T	112223594	0.3678	6.7112e-09	0.010234	0.001765	0.753243	REEP5:ENSG00000272869	0	intronic:intronic	0.195	NA	4	1
5	18	rs2952615	rs712664	C	A	112223601	0.341	5.26866e-08	0.0094837	0.0017426	0.704475	ENSG00000272869:REEP5	0	intronic:intronic	3.221	NA	4	1
5	18	rs2952615	rs57721139	A	G	112223870	0.3638	NA	NA	NA	0.769085	ENSG00000272869:REEP5	0	intronic:intronic	2.983	5	4	0
5	18	rs2952615	rs458451	C	T	112224331	0.3648	1.04064e-08	0.010053	0.0017562	0.765652	ENSG00000272869:REEP5	0	intronic:intronic	1.211	NA	4	1
5	18	rs2952615	rs455412	T	G	112224389	0.3648	1.03538e-08	0.010054	0.0017562	0.758666	ENSG00000272869:REEP5	0	intronic:intronic	8.925	NA	4	1
5	18	rs2952615	rs456313	C	G	112224952	0.3439	1.94626e-08	0.0098702	0.0017572	0.693746	ENSG00000272869:REEP5	0	intronic:intronic	5.816	5	4	1
5	18	rs2952615	rs460832	A	G	112225148	0.3648	1.05269e-08	0.010049	0.0017562	0.765652	ENSG00000272869:REEP5	0	intronic:intronic	4.876	NA	4	1
5	18	rs151980	rs818426	A	G	112226192	0.4612	4.91926e-09	0.010247	0.0017515	0.799906	ENSG00000272869:REEP5	0	intronic:intronic	2.289	NA	4	1
5	18	rs2952615	rs818425	T	C	112226655	0.3439	2.06871e-08	0.0098516	0.0017572	0.693746	ENSG00000272869:REEP5	0	intronic:intronic	2.562	NA	4	1
5	18	rs2952615	rs818424	A	G	112226874	0.3648	1.05901e-08	0.010047	0.0017562	0.765652	ENSG00000272869:REEP5	0	intronic:intronic	0.06	NA	4	1
5	18	rs2952615	rs818423	T	C	112226977	0.3429	3.96187e-08	0.009629	0.0017531	0.697258	REEP5:ENSG00000272869	0	intronic:intronic	1.192	NA	4	1
5	18	rs2952615	rs712665	G	A	112227799	0.3638	2.01697e-08	0.0098319	0.0017524	0.769085	ZRSR1	0	exonic	0.022	NA	4	1
5	18	rs2952615	rs712666	C	T	112227939	0.3638	1.9829e-08	0.0098372	0.0017524	0.769085	ZRSR1	0	exonic	4.987	NA	4	1
5	18	rs2952615	rs430665	A	G	112228667	0.3638	1.39798e-08	0.0099426	0.0017524	0.769085	ZRSR1	0	exonic	15.51	7	4	1
5	18	rs2952615	rs459102	A	C	112228765	0.3678	5.55009e-09	0.010286	0.0017644	0.753243	ZRSR1	0	exonic	0.063	NA	4	1
5	18	rs2952615	rs434090	G	A	112229523	0.3529	5.34072e-08	0.0094833	0.0017433	0.668831	ENSG00000270067	0	ncRNA_exonic	1.492	NA	4	1
5	18	rs2952615	rs519397	C	T	112229688	0.3529	4.16294e-08	0.0096176	0.0017538	0.663026	ENSG00000270067	0	ncRNA_exonic	3.569	NA	4	1
5	18	rs2952615	rs461424	A	G	112229903	0.3529	5.29907e-08	0.0094647	0.0017395	0.656322	REEP5	0	intronic	3.469	NA	4	1
5	18	rs2952615	rs465454	C	T	112230331	0.3519	5.01649e-08	0.009559	0.0017537	0.667224	REEP5	0	intronic	0.742	NA	4	1
5	18	rs2952615	rs461866	A	G	112231450	0.3678	4.99804e-08	0.0095515	0.0017521	0.72067	REEP5	0	intronic	3.208	NA	2	1
5	18	rs2952615	rs469663	G	A	112231829	0.3728	2.95325e-08	0.0097119	0.0017517	0.734601	REEP5	0	intronic	4.821	NA	4	1
5	18	rs151980	rs387577	A	T	112233048	0.4851	NA	NA	NA	0.779584	REEP5	0	intronic	2.591	5	4	0
5	18	rs151980	rs153552	C	T	112233750	0.4732	3.24041e-09	0.010338	0.0017466	0.775345	ENSG00000272389	0	ncRNA_exonic	0.422	NA	4	1
5	18	rs2952615	rs151978	G	T	112234498	0.3519	6.39588e-08	0.0094276	0.0017434	0.667224	REEP5	0	intronic	6.485	7	4	1
5	18	rs2952615	rs151977	T	A	112234549	0.3489	6.42244e-08	0.0094282	0.0017438	0.671299	REEP5	0	intronic	12.81	6	4	1
5	18	rs151980	rs153551	G	T	112234834	0.4791	7.2144e-09	0.010144	0.0017532	0.798451	REEP5	0	intronic	1.403	NA	4	1
5	18	rs2952615	rs153550	T	C	112234957	0.3757	NA	NA	NA	0.722645	REEP5	0	intronic	1.748	NA	4	1
5	18	rs151980	rs153549	G	A	112236297	0.4742	1.40734e-08	0.0099294	0.0017504	0.66339	REEP5	0	intronic	1.978	7	4	1
5	18	rs2952615	rs151976	T	C	112236448	0.3509	6.53281e-08	0.0094209	0.0017434	0.664704	REEP5	0	intronic	2.726	NA	4	1
5	18	rs2952615	rs153548	C	A	112237724	0.3708	2.19887e-08	0.0098044	0.0017521	0.708652	REEP5	0	intronic	0.246	NA	4	1
5	18	rs2952615	rs153547	G	T	112237917	0.3827	NA	NA	NA	0.657658	REEP5	0	intronic	0.363	NA	4	0
5	18	rs2952615	rs153546	C	A	112238039	0.3509	2.23924e-08	0.0098035	0.001753	0.639174	REEP5	0	intronic	3.591	NA	4	1
5	18	rs2952615	rs153545	C	T	112238882	0.3439	6.48037e-08	0.0094265	0.001744	0.65892	REEP5	0	intronic	8.131	NA	4	1
5	18	rs2952615	rs818783	A	C	112241253	0.3499	NA	NA	NA	0.700602	REEP5	0	intronic	0.514	NA	4	1
5	18	rs151980	rs818782	C	A	112241260	0.4304	NA	NA	NA	0.698512	REEP5	0	intronic	0.159	NA	4	1
5	18	rs2952615	rs469827	A	C	112242139	0.3628	8.10214e-09	0.010105	0.0017523	0.739274	REEP5	0	intronic	3.745	NA	4	1
5	18	rs2952615	rs469727	T	C	112242968	0.3588	2.89668e-08	0.0096752	0.001744	0.755134	REEP5	0	intronic	7.212	NA	2	1
5	18	rs2952615	rs698405	T	C	112243527	0.3588	2.98745e-08	0.0096652	0.0017439	0.755134	REEP5	0	intronic	0.344	NA	4	1
5	18	rs2952615	rs468101	G	A	112244010	0.3588	2.97715e-08	0.0096661	0.0017439	0.755134	REEP5	0	intronic	2.603	NA	4	1
5	18	rs151980	rs468751	T	C	112244037	0.4592	4.69894e-09	0.010235	0.0017473	0.792569	REEP5	0	intronic	2.791	NA	4	1
5	18	rs2952615	rs446567	C	T	112244423	0.338	5.78895e-08	0.009459	0.0017435	0.684975	REEP5	0	intronic	9.531	NA	4	1
5	18	rs2952615	rs469760	A	G	112244777	0.338	9.34329e-08	0.0093086	0.0017435	0.684975	REEP5	0	intronic	4.639	NA	4	1
5	18	rs151980	rs469886	T	G	112245147	0.4592	7.42677e-09	0.010102	0.0017473	0.792569	REEP5	0	intronic	0.321	NA	4	1
5	18	rs2952615	rs468854	T	C	112245936	0.3628	1.38931e-08	0.0099433	0.0017522	0.739274	REEP5	0	intronic	0.63	NA	4	1
5	18	rs2952615	rs468783	T	G	112245970	0.338	7.32656e-08	0.0093833	0.0017431	0.684975	REEP5	0	intronic	0.293	NA	4	1
5	18	rs2952615	rs468610	A	G	112245987	0.3638	1.17247e-08	0.0099936	0.0017521	0.735149	REEP5	0	intronic	1.983	7	4	1
5	18	rs151980	rs153544	C	T	112248466	0.4642	1.22096e-08	0.00999	0.0017536	0.811435	REEP5	0	intronic	2.419	NA	4	1
5	18	rs151980	rs154344	C	T	112248738	0.4642	1.31886e-08	0.0099666	0.0017535	0.811435	REEP5	0	intronic	0.4	NA	2	1
5	18	rs2952615	rs193527	T	C	112250198	0.327	1.42102e-07	0.0091532	0.0017393	0.655707	REEP5	0	intronic	1.103	NA	4	1
5	18	rs151980	rs149193	C	A	112250361	0.4662	9.99079e-09	0.010053	0.0017541	0.818947	REEP5	0	intronic	1.32	NA	2	1
5	18	rs2952615	rs153565	T	A	112250376	0.3907	5.69771e-08	0.0095764	0.0017642	0.636527	REEP5	0	intronic	1.655	4	2	1
5	18	rs2952615	rs173466	C	T	112251430	0.3738	1.12021e-06	0.0084762	0.0017407	0.637586	REEP5	0	intronic	3.493	NA	4	1
5	18	rs151980	rs149192	T	C	112252066	0.4632	4.44222e-07	0.0088078	0.0017444	0.912432	REEP5	0	intronic	3.393	NA	2	1
5	18	rs151980	rs149191	G	A	112252258	0.4881	3.4435e-07	0.0089325	0.0017523	0.848827	REEP5	0	intronic	5.348	NA	3	1
5	18	rs151980	rs153563	C	T	112252671	0.4881	2.82879e-07	0.008969	0.0017468	0.848827	REEP5	0	intronic	6.336	NA	3	1
5	18	rs2952615	rs153562	A	G	112253119	0.3767	1.6323e-06	0.008323	0.001736	0.676367	REEP5	0	intronic	6.495	NA	3	1
5	18	rs151980	rs153561	G	A	112253133	0.4881	2.99916e-07	0.0089516	0.0017471	0.848827	REEP5	0	intronic	1.965	NA	3	1
5	18	rs154346	rs153560	A	G	112254377	0.3718	1.95164e-07	0.0090693	0.0017427	0.934278	REEP5	0	intronic	4.801	NA	2	1
5	18	rs151980	rs153559	T	C	112255219	0.4622	4.13904e-07	0.0088134	0.0017409	0.916	REEP5	0	intronic	1.967	NA	4	1
5	18	rs151980	rs149190	G	A	112256814	0.4453	3.56287e-08	0.0096214	0.0017457	1	REEP5	0	intronic	5.624	NA	1	1
5	18	rs2952615	rs153558	T	C	112257251	0.3579	1.10078e-07	0.0092253	0.0017376	0.712887	REEP5	0	intronic	7.537	NA	1	1
5	18	rs151980	rs153557	G	A	112257366	0.4672	3.52128e-08	0.0096659	0.0017532	0.914088	REEP5	0	intronic	10.5	NA	1	1
5	18	rs151980	rs151980	G	C	112257591	0.4453	3.00608e-08	0.0096693	0.001745	1	REEP5	0	UTR5	4.429	3a	1	1
5	18	rs151980	rs153556	C	T	112257908	0.4732	5.57442e-08	0.0094776	0.0017448	0.895123	REEP5	0	exonic	7.292	NA	1	1
5	18	rs2952615	rs468735	C	T	112260972	0.3787	6.80299e-07	0.0086369	0.0017389	0.661996	REEP5	2736	intergenic	1.45	NA	5	1
5	18	rs151980	rs467660	A	G	112260973	0.4861	4.76541e-07	0.0088295	0.0017534	0.848269	REEP5	2737	intergenic	3.534	5	5	1
5	18	rs151980	rs153553	A	G	112261278	0.4871	2.38891e-07	0.0090582	0.0017533	0.852048	REEP5	3042	intergenic	0.825	NA	5	1
5	18	rs151980	rs151979	C	T	112263863	0.4205	6.8124e-07	0.0087175	0.0017552	0.654663	REEP5	5627	intergenic	4.915	NA	2	1
5	18	rs154346	rs154346	G	A	112265493	0.3807	4.27563e-08	0.0095484	0.0017427	1	REEP5	7257	intergenic	10.68	NA	2	1
5	18	rs151980	rs149130	A	G	112267095	0.4801	9.12011e-08	0.0093735	0.0017542	0.824872	REEP5	8859	intergenic	1.183	NA	5	1
5	18	rs2952615	rs149502	C	T	112269219	0.3688	2.27615e-07	0.0089808	0.0017353	0.640873	REEP5	10983	intergenic	8.496	NA	5	1
5	18	rs151980	rs153569	C	T	112274827	0.4811	1.32008e-07	0.0092551	0.0017541	0.821572	REEP5	16591	intergenic	1.528	NA	5	1
5	18	rs151980	rs818799	T	G	112286749	0.4861	NA	NA	NA	0.79919	DCP2	25650	intergenic	0.326	NA	5	1
5	18	rs2952615	rs153568	G	T	112289001	0.3817	4.78961e-06	0.0079374	0.0017354	0.630486	DCP2	23398	intergenic	2.882	4	9	1
5	18	rs151980	rs153567	C	T	112290051	0.4911	NA	NA	NA	0.799225	DCP2	22348	intergenic	4.184	NA	5	1
5	18	rs151980	rs1103759	C	T	112290557	0.492	NA	NA	NA	0.811289	DCP2	21842	intergenic	3.828	NA	5	1
5	18	rs2952615	rs469716	A	G	112292986	0.3787	5.84521e-06	0.0078752	0.0017377	0.632927	DCP2	19413	intergenic	2.485	NA	2	1
5	18	rs151980	rs469753	T	G	112293478	0.4881	1.3954e-06	0.0084578	0.0017526	0.807988	DCP2	18921	intergenic	2.994	NA	2	1
5	18	rs2952615	rs469702	T	G	112293523	0.3807	3.51399e-06	0.008139	0.0017547	0.626649	DCP2	18876	intergenic	4.416	NA	2	1
5	18	rs2952615	rs469523	A	G	112294680	0.3807	3.51399e-06	0.0081396	0.0017549	0.626649	DCP2	17719	intergenic	2.316	NA	2	1
5	18	rs2952615	rs153570	C	T	112299978	0.3807	3.2107e-06	0.0081067	0.0017408	0.6382	DCP2	12421	intergenic	3.984	NA	2	1
5	18	rs151980	rs17135222	G	A	112301362	0.4891	1.79804e-06	0.0082979	0.0017378	0.812406	DCP2	11037	intergenic	17.58	6	5	1
5	18	rs151980	rs1624259	C	A	112302157	0.4622	1.71041e-06	0.0083206	0.0017389	0.847496	DCP2	10242	intergenic	2.109	NA	5	1
5	18	rs151980	rs1644099	A	G	112302332	0.492	2.36919e-06	0.0082627	0.0017509	0.801223	DCP2	10067	intergenic	2.458	NA	5	1
5	19	rs6870103	rs185123	C	T	139517197	0.4871	1.85225e-06	-0.0083159	0.0017437	0.683713	IGIP	8806	intergenic	2.058	6	5	1
5	19	rs6870103	rs155948	A	G	139519181	0.4861	1.74542e-06	-0.0083369	0.0017438	0.680789	IGIP	10790	intergenic	12.63	NA	5	1
5	19	rs6870103	rs155947	T	C	139520556	0.4871	1.84162e-06	-0.0083175	0.0017437	0.683713	IGIP	12165	intergenic	3.631	NA	2	1
5	19	rs6870103	rs156090	C	T	139521684	0.4871	1.42397e-06	-0.0084059	0.0017433	0.683713	IGIP	13293	intergenic	1.455	6	5	1
5	19	rs6870103	rs152409	C	T	139521808	0.4871	1.40767e-06	-0.0084102	0.0017434	0.683713	IGIP	13417	intergenic	5.977	7	5	1
5	19	rs6870103	rs155949	G	A	139523684	0.4851	1.30407e-06	-0.0084385	0.0017438	0.686426	CTB-131B5.5	13220	intergenic	13.43	5	5	1
5	19	rs6870103	rs249616	T	C	139529656	0.4891	1.38134e-06	-0.0084221	0.0017445	0.687391	CTB-131B5.5	7248	intergenic	7.204	5	5	1
5	19	rs6870103	rs155943	T	A	139529987	0.4851	1.61845e-06	-0.0083637	0.0017438	0.686426	CTB-131B5.5	6917	intergenic	2.015	5	5	1
5	19	rs6870103	rs269767	G	A	139536922	0.4742	9.24698e-09	-0.010057	0.0017508	0.818689	CTB-131B5.5	0	ncRNA_exonic	4.843	NA	1	1
5	19	rs6870103	rs270162	T	C	139539090	0.4712	5.02227e-09	-0.010226	0.0017491	0.826743	CTB-131B5.5	0	ncRNA_intronic	10.24	2b	5	1
5	19	rs6870103	rs199152	G	A	139539235	0.4742	5.48025e-09	-0.010202	0.0017492	0.818689	CTB-131B5.5	0	ncRNA_intronic	1.899	NA	5	1
5	19	rs6870103	rs175086	A	G	139543091	0.4712	6.69422e-09	0.010145	0.0017495	0.819868	CTB-131B5.5	0	ncRNA_exonic	1.709	7	5	1
5	19	rs6870103	rs4463213	A	G	139545748	0.4493	1.93108e-08	0.0098259	0.0017489	0.951323	CTB-131B5.5	0	ncRNA_exonic	7.856	5	2	1
5	19	rs6870103	rs7726176	A	T	139547971	0.4493	1.70844e-08	0.0098605	0.0017485	0.951323	CTB-131B5.5	0	ncRNA_intronic	14.08	4	2	1
5	19	rs6870103	rs2436391	T	C	139557385	0.4463	1.30557e-08	0.0099365	0.0017477	0.962535	CYSTM1	0	intronic	8.287	NA	1	1
5	19	rs6870103	rs11748023	T	C	139558584	0.4473	1.69473e-08	0.0098607	0.0017481	0.966369	CYSTM1	0	intronic	0.508	5	2	1
5	19	rs6870103	rs11745502	A	G	139558808	0.4463	1.28499e-08	0.0099414	0.0017477	0.962535	CYSTM1	0	intronic	0.046	6	5	1
5	19	rs6870103	rs11750229	G	T	139559014	0.4473	1.25545e-08	0.0099504	0.0017481	0.966369	CYSTM1	0	intronic	0.626	7	5	1
5	19	rs6870103	rs421211	A	G	139581773	0.4473	1.32373e-08	0.009933	0.0017478	0.966369	ENSG00000250069	0	ncRNA_exonic	0.134	2b	4	1
5	19	rs6870103	rs397463	G	C	139584275	0.4463	1.48559e-08	0.0098978	0.0017477	0.962535	CYSTM1	0	intronic	4.296	7	4	1
5	19	rs6870103	rs2436390	A	G	139586501	0.4473	1.29539e-08	0.0099412	0.0017481	0.966369	CYSTM1	0	intronic	1.383	NA	5	1
5	19	rs6870103	rs12717951	G	A	139589309	0.4463	1.26038e-08	-0.0099468	0.0017477	0.962535	CYSTM1	0	intronic	1.15	7	5	1
5	19	rs6870103	rs10060071	C	T	139599097	0.4433	1.10281e-08	-0.0099844	0.0017473	0.973619	CYSTM1	0	intronic	1.312	2b	2	1
5	19	rs6870103	rs4913077	C	T	139614795	0.4443	1.03825e-08	-0.010003	0.0017474	0.977402	CYSTM1	0	intronic	1.182	5	5	1
5	19	rs6870103	rs12188849	A	G	139621570	0.4443	9.68724e-09	-0.010023	0.0017474	0.977402	CYSTM1	0	intronic	2.452	5	2	1
5	19	rs6870103	rs7717576	A	G	139623591	0.4453	1.34865e-08	-0.0099422	0.0017504	0.973529	CYSTM1	0	downstream	1.084	5	4	1
5	19	rs6870103	rs7732649	A	C	139623592	0.4453	1.3649e-08	-0.009939	0.0017505	0.973529	CYSTM1	0	downstream	3.572	5	4	1
5	19	rs6870103	rs1142828	T	G	139623901	0.4443	9.77012e-09	-0.010021	0.0017474	0.977402	PFDN1:CYSTM1	0	downstream:downstream	0.496	7	4	1
5	19	rs6870103	rs9686454	C	T	139627813	0.4443	9.72747e-09	-0.010017	0.0017464	0.977402	PFDN1	0	intronic	1.398	7	4	1
5	19	rs6870103	rs7730245	A	C	139628163	0.4443	9.53894e-09	-0.010026	0.0017471	0.977402	PFDN1	0	intronic	7.519	5	4	1
5	19	rs6870103	rs6869910	C	T	139629450	0.4324	5.47142e-08	-0.0095025	0.0017483	0.918707	PFDN1	0	intronic	1.459	5	4	1
5	19	rs6870103	rs6863474	T	C	139630862	0.4443	9.45366e-09	-0.010031	0.0017474	0.977402	PFDN1	0	intronic	2.798	6	4	1
5	19	rs6870103	rs1864970	C	T	139633042	0.4443	8.99912e-09	-0.010043	0.001747	0.977402	PFDN1	0	intronic	11.1	4	2	1
5	19	rs6870103	rs62385161	C	T	139635747	0.4443	7.46449e-09	-0.010101	0.0017475	0.977402	PFDN1	0	intronic	14.31	5	4	1
5	19	rs6870103	rs35214989	C	T	139636127	0.4453	1.07004e-08	-0.0099953	0.0017476	0.973529	PFDN1	0	intronic	7.359	5	4	1
5	19	rs6870103	rs13177454	C	T	139636570	0.4443	9.93116e-09	-0.010017	0.0017475	0.977402	PFDN1	0	intronic	0.739	7	4	1
5	19	rs6870103	rs13177186	G	A	139640476	0.4443	9.1939e-09	-0.010039	0.0017474	0.977402	PFDN1	0	intronic	4.393	6	4	1
5	19	rs6870103	rs6867870	A	C	139641896	0.4443	8.88178e-09	-0.010049	0.0017474	0.977402	PFDN1	0	intronic	2.94	5	2	1
5	19	rs6870103	rs2337081	C	A	139642414	0.4443	9.17698e-09	-0.01004	0.0017474	0.977402	PFDN1	0	intronic	4.958	5	4	1
5	19	rs6870103	rs7737543	G	A	139646026	0.4443	8.84301e-09	-0.010051	0.0017475	0.977402	PFDN1	0	intronic	3.274	4	4	1
5	19	rs6870103	rs2053055	T	C	139646776	0.4443	8.40621e-09	-0.010066	0.0017474	0.977402	PFDN1	0	intronic	5.087	4	2	1
5	19	rs6870103	rs6580473	G	A	139646962	0.4433	7.13674e-09	-0.010114	0.0017475	0.981291	PFDN1	0	intronic	15.26	5	2	1
5	19	rs6870103	rs2053056	C	A	139648183	0.4443	8.37336e-09	-0.010067	0.0017474	0.977402	PFDN1	0	intronic	0.703	7	5	1
5	19	rs6870103	rs2337082	A	G	139649201	0.4433	6.41653e-09	-0.010145	0.0017475	0.981291	PFDN1	0	intronic	0.263	6	5	1
5	19	rs6870103	rs13186198	A	G	139652057	0.4433	6.37382e-09	-0.010147	0.0017474	0.981291	PFDN1	0	intronic	0.3	7	4	1
5	19	rs6870103	rs6889283	T	G	139653439	0.4443	8.30042e-09	-0.010069	0.0017473	0.977402	PFDN1	0	intronic	1.588	4	4	1
5	19	rs6870103	rs2116790	A	G	139654115	0.4423	6.50279e-09	-0.010141	0.0017475	0.97766	PFDN1	0	intronic	3.506	7	4	1
5	19	rs6870103	rs13353827	C	T	139654537	0.4443	8.55658e-09	-0.01006	0.0017474	0.977402	PFDN1	0	intronic	0.183	5	4	1
5	19	rs6870103	rs13359519	A	G	139654664	0.4443	8.41201e-09	-0.010065	0.0017474	0.977402	PFDN1	0	intronic	2.235	5	4	1
5	19	rs6870103	rs6879174	G	A	139654732	0.4443	8.59409e-09	-0.010058	0.0017473	0.977402	PFDN1	0	intronic	0.833	6	4	1
5	19	rs6870103	rs6896007	A	G	139654951	0.4443	9.13061e-09	-0.010042	0.0017475	0.977402	PFDN1	0	intronic	3.9	5	4	1
5	19	rs6870103	rs6879629	G	A	139654979	0.4453	NA	NA	NA	0.973529	PFDN1	0	intronic	1	5	4	1
5	19	rs6870103	rs3777095	A	G	139660916	0.4493	3.72477e-09	-0.010296	0.0017463	0.996171	PFDN1	0	intronic	4.221	NA	4	1
5	19	rs6870103	rs6893253	C	T	139661279	0.4493	3.61993e-09	-0.010304	0.0017463	0.996171	PFDN1	0	intronic	1.767	7	4	1
5	19	rs6870103	rs7715538	C	T	139665181	0.4483	2.88403e-09	-0.01037	0.0017464	1	PFDN1	0	intronic	0.153	5	1	1
5	19	rs6870103	rs13188413	A	T	139666287	0.4503	2.96483e-09	-0.010362	0.0017462	0.992357	PFDN1	0	intronic	1.756	7	5	1
5	19	rs6870103	rs13161399	T	G	139666427	0.4493	3.46817e-09	-0.010316	0.0017462	0.996171	PFDN1	0	intronic	0.666	7	5	1
5	19	rs6870103	rs10477348	T	A	139666906	0.4414	6.86594e-09	-0.010122	0.0017469	0.965992	PFDN1	0	intronic	4.06	5	5	1
5	19	rs6870103	rs1347143	A	G	139669386	0.4433	3.63245e-09	-0.010307	0.0017469	0.981178	PFDN1	0	intronic	0.42	7	4	1
5	19	rs6870103	rs62385163	G	C	139670591	0.3559	2.35017e-05	-0.0073859	0.0017466	0.679859	PFDN1	0	intronic	5.474	7	5	1
5	19	rs6870103	rs10051345	C	G	139670932	0.4483	2.44231e-09	-0.010419	0.0017466	1	PFDN1	0	intronic	0.254	6	5	1
5	19	rs6870103	rs13170475	T	C	139671062	0.4493	3.17907e-09	-0.010341	0.0017462	0.996171	PFDN1	0	intronic	8.318	7	5	1
5	19	rs6870103	rs35497327	C	A	139671255	0.3032	NA	NA	NA	0.613421	PFDN1	0	intronic	0.463	6	5	0
5	19	rs6870103	rs201855636	C	A	139671256	0.4483	NA	NA	NA	1	PFDN1	0	intronic	3.277	6	5	0
5	19	rs6870103	rs1529693	G	A	139678213	0.4483	2.74916e-09	-0.010385	0.0017465	1	PFDN1	0	intronic	1.727	3a	3	1
5	19	rs6870103	rs7725147	G	A	139679046	0.4493	3.03879e-09	-0.010355	0.0017464	0.996171	PFDN1	0	intronic	0.922	7	4	1
5	19	rs6870103	rs4913079	G	A	139683029	0.4493	3.00608e-09	-0.010355	0.0017459	0.996171	PFDN1	0	upstream	4.136	4	1	1
5	19	rs6870103	rs6873248	G	A	139683762	0.4493	3.17541e-09	0.010342	0.0017462	0.996171	PFDN1	1056	intergenic	2.759	4	1	1
5	19	rs6870103	rs4912709	C	T	139684087	0.4493	2.98195e-09	0.010358	0.0017459	0.996171	PFDN1	1381	intergenic	4.046	7	5	1
5	19	rs6870103	rs10077671	G	A	139689505	0.4493	6.39882e-09	0.010131	0.0017448	0.996171	PFDN1	6799	intergenic	8.342	5	5	1
5	19	rs6870103	rs7717563	G	A	139689968	0.4483	2.01512e-09	0.010465	0.0017451	1	PFDN1	7262	intergenic	3.453	7	5	1
5	19	rs6870103	rs2337138	A	C	139691664	0.4493	2.51362e-09	0.010401	0.0017449	0.996171	PFDN1	8958	intergenic	8.966	4	1	1
5	19	rs6870103	rs6870103	T	G	139692515	0.4483	1.87715e-09	0.010484	0.001745	1	PFDN1	9809	intergenic	4.088	4	5	1
5	19	rs6870103	rs4912710	G	A	139694938	0.4473	1.90678e-08	0.0098079	0.0017451	0.988549	PFDN1	12232	intergenic	0.028	7	5	1
5	19	rs6870103	rs2189659	C	A	139697220	0.4483	NA	NA	NA	0.992326	PFDN1	14514	intergenic	3.444	NA	5	1
5	19	rs6870103	rs6580515	C	A	139698110	0.4473	1.25401e-08	0.0099295	0.0017443	0.980946	HBEGF	14318	intergenic	1.302	7	5	1
5	19	rs6870103	rs6580516	T	G	139698143	0.4473	1.6531e-08	0.0098446	0.001744	0.980946	HBEGF	14285	intergenic	0.016	7	5	1
5	19	rs6870103	rs10061835	C	T	139700578	0.4453	1.1102e-08	0.0099655	0.0017443	0.980989	HBEGF	11850	intergenic	1.647	7	5	1
5	19	rs6870103	rs11168018	A	T	139700608	0.4443	2.36865e-08	0.009737	0.0017441	0.969613	HBEGF	11820	intergenic	5.522	6	5	1
5	19	rs6870103	rs6884244	G	A	139708382	0.4274	8.20729e-05	0.0068574	0.0017412	0.637086	HBEGF	4046	intergenic	0.002	7	5	1
5	19	rs6870103	rs11168040	G	A	139711031	0.4274	7.80189e-05	0.0068791	0.0017413	0.637086	HBEGF	1397	intergenic	0.53	6	4	1
5	19	rs6870103	rs10875633	G	A	139711132	0.4284	8.05749e-05	0.0068658	0.0017414	0.634723	HBEGF	1296	intergenic	3.093	7	4	1
5	19	rs6870103	rs2282802	A	G	139712239	0.4344	5.27837e-05	0.0070368	0.0017405	0.658553	HBEGF	0	downstream	3.846	NA	4	1
5	19	rs6870103	rs7268	C	A	139712550	0.4334	5.02805e-05	0.0070568	0.0017405	0.650184	HBEGF	0	UTR3	6.373	NA	2	1
5	19	rs6870103	rs2074613	T	C	139714564	0.4284	5.95937e-05	0.0069952	0.0017425	0.627442	HBEGF	0	intronic	7.307	NA	4	1
5	19	rs6870103	rs2074612	C	T	139714690	0.4215	0.00012939	0.0066687	0.0017423	0.607996	HBEGF	0	intronic	2.528	NA	4	1
6	20	rs1575676	rs1575676	T	C	108861264	0.4334	1.98793e-10	0.011183	0.0017577	1	ENSG00000271608	10957	intergenic	2.355	NA	5	0
6	20	rs1575676	rs9384679	T	C	108864419	0.4334	3.91832e-10	0.010998	0.0017575	0.984441	ENSG00000271608	7802	intergenic	6.71	4	5	0
6	20	rs1575676	rs6911407	A	C	108867031	0.4324	5.8023e-10	0.010887	0.0017571	0.980536	ENSG00000271608	5190	intergenic	6.759	5	5	0
6	20	rs1575676	rs6918436	A	G	108868422	0.3489	NA	NA	NA	0.694783	ENSG00000271608	3799	intergenic	1.814	5	5	0
6	20	rs1575676	rs768023	A	G	108876002	0.4334	9.77462e-10	-0.010808	0.0017679	0.961494	ENSG00000271608	3592	intergenic	1.558	7	5	0
6	20	rs4946935	rs1536057	T	C	108885623	0.3201	4.8095e-09	0.010202	0.0017428	0.632028	FOXO3	0	intronic	13.13	NA	1	0
6	20	rs1575676	rs2253310	G	C	108888593	0.4334	3.87972e-10	-0.011041	0.001764	0.95388	FOXO3	0	intronic	5.85	5	1	0
6	20	rs1575676	rs2764265	T	C	108894438	0.4344	3.79053e-10	-0.011082	0.0017695	0.950237	FOXO3	0	intronic	0.3	7	4	1
[truncated: 2,509 more rows]
