# Supplementary material for: Study of 300,486 individuals identifies 148 independent genetic loci influencing general cognitive function
Source: Nat Commun. 2018 May 29;9:2098. doi: 10.1038/s41467-018-04362-x (PMC5974083; doi:10.1038/s41467-018-04362-x)
Supplement: Supplementary file 16 — Supplementary Data 13 [file 41467_2018_4362_MOESM16_ESM.xlsx]

## Sheet: Sheet1
Supplementary Data 13. Genome-wide significant (P < 2.75 x 10-6) gene based associations for UK Biobank reaction time. Novel gene based associations are presented in bold.
Gene	Chromosome	Start	Stop	Number of SNPs	P
SPATS2L	2	201160604	201356986	716	2.4379e-17
ACAD10	12	112113857	112204903	201	1.2252e-13
AMBRA1	11	46407964	46625675	566	1.4826e-13
PRKAG1	12	49386057	49422980	83	1.8683e-13
BRAP	12	112069950	112133790	144	2.5745e-13
ATG13	11	46628826	46706368	222	3.0194e-13
DDN	12	49378932	49403092	68	7.6823e-13
ARHGAP1	11	46688630	46732165	156	8.9987e-13
ALDH2	12	112194691	112257782	152	1.0421e-12
APC	5	112033195	112191936	760	1.9172e-12
ZBTB7A	19	4034362	4076943	183	5.346e-12
ZNF408	11	46712368	46737462	82	5.4148e-12
NMNAT2	1	183207372	183397737	851	8.2196e-12
ATXN2	12	111880018	112047480	548	8.5494e-12
REEP5	5	112202084	112268236	388	8.6958e-12
OLA1	2	174927175	175123426	937	9.8628e-12
PFDN1	5	139614624	139692706	253	1.0333e-11
FOXO3	6	108871038	109015977	531	2.6618e-11
MDK	11	46392306	46415375	60	3.0666e-11
HARBI1	11	46614411	46649459	92	3.2569e-11
KMT2D	12	49402758	49463557	139	3.4542e-11
ZRSR1	5	112217313	112238791	120	3.9466e-11
ARL17A	17	44584068	44667088	11	4.5438e-11
CKAP5	11	46754598	46877847	356	4.6611e-11
AGBL4	1	48988527	50499585	5010	5.9313e-11
CSE1L	20	47652849	47723489	286	6.5429e-11
C11orf49	11	46948240	47195936	714	7.8015e-11
ZNF638	2	71493691	71672199	799	9.8989e-11
F2	11	46730730	46771056	148	1.283e-10
TMEM116	12	112359086	112460970	296	1.3608e-10
SRP19	5	112186919	112215485	184	1.5724e-10
DGKZ	11	46344455	46412104	244	1.8466e-10
CYSTM1	5	139544227	139671637	440	2.3227e-10
SMG7	1	183431351	183577381	490	3.1388e-10
ARFGAP2	11	47175848	47208676	123	3.2127e-10
SH2B3	12	111833752	111899427	219	3.6993e-10
RHEBL1	12	49448468	49473808	51	4.7688e-10
LRP4	11	46868419	46950193	261	4.9499e-10
PACSIN3	11	47189076	47217994	92	5.7458e-10
PCDH17	13	58195944	58313445	426	5.9359e-10
CHRM4	11	46396640	46418107	52	6.8784e-10
CIR1	2	175202750	175270443	228	7.1528e-10
KIAA1328	18	34399069	34822135	1424	7.2834e-10
NAA25	12	112454500	112556826	264	8.5849e-10
DHH	12	49473204	49498602	89	8.8891e-10
MAPKAPK5	12	112269782	112344343	263	9.316e-10
NREP	5	110988318	111343161	1726	1.1305e-09
METAP1D	2	172854490	172957158	490	1.1768e-09
PHF21A	11	45940871	46152985	659	1.4277e-09
RMI1	9	86585626	86628985	142	1.6063e-09
DCC	18	49856542	51067784	7327	1.6829e-09
TNIK	3	170769128	171188197	1939	2.212e-09
HNRNPK	9	86572998	86605569	107	2.2696e-09
C9orf64	9	86543226	86581901	151	2.3249e-09
PTBP2	1	97177221	97299294	493	2.3362e-09
SCRN3	2	175250458	175304303	221	3.0229e-09
HECTD4	12	112587992	112829896	630	3.486e-09
SREBF1	17	17703713	17750325	184	4.8475e-09
FOXP1	3	70993844	71643140	2535	6.7515e-09
MCTP1	5	94029446	94630279	2550	6.8104e-09
PPIA	7	44826279	44874163	245	6.999e-09
CD47	3	107752145	107819872	226	8.0016e-09
PTPN23	3	47412501	47464931	140	8.0272e-09
SLC35D1	1	67455015	67529782	320	8.8908e-09
PURB	7	44905896	44934960	110	9.0878e-09
TET1	10	70310413	70464239	734	9.6549e-09
FLRT1	11	63860660	63896645	179	9.7543e-09
HERC3	4	89432199	89639693	861	1.0501e-08
FAM228B	2	24289396	24402509	500	1.0799e-08
ELP5	17	7144735	7173259	86	1.1376e-08
PTPN11	12	112846155	112957717	260	1.3157e-08
SAMD3	6	130455460	130696570	1498	1.3165e-08
LRRC37A2	17	44578877	44643016	12	1.4343e-08
ELP6	3	47527130	47565251	124	1.8099e-08
CUX2	12	111461828	111798358	1267	1.8128e-08
GPR155	2	175286966	175361822	281	1.8333e-08
EFNA5	5	106702590	107016596	1508	1.8699e-08
FAM109A	12	111788455	111816925	98	1.9842e-08
PDE12	3	57532003	57562571	121	2.0371e-08
UBE2E2	3	23234511	23643284	2064	2.1375e-08
CLDN7	17	7153222	7177302	87	2.1408e-08
PEX5L	3	179502746	179764841	1194	2.4098e-08
SCAP	3	47445203	47528616	212	2.8191e-08
STIP1	11	63942744	63982015	146	3.193e-08
MACROD1	11	63756030	63943578	798	3.2408e-08
ZNF664	12	124446392	124509986	229	3.3576e-08
STAU1	20	47719878	47814904	356	3.4074e-08
ATOX1	5	151111877	151162093	177	3.503e-08
CTDNEP1	17	7136910	7165810	81	3.6651e-08
LRRC4	7	127657124	127682160	74	3.9302e-08
ELAVL4	1	50503686	50679458	507	5.2527e-08
SLC25A12	2	172630880	172874766	1074	8.2959e-08
ESAM	11	124612026	124642186	115	8.3016e-08
ARFGEF2	20	47528427	47663230	541	8.8057e-08
PRDM11	11	45105564	45257734	590	8.8628e-08
MFSD2B	2	24222951	24296191	311	9.0594e-08
TPPP	5	650883	703510	258	9.3095e-08
TRAFD1	12	112553305	112601407	114	9.7317e-08
NGEF	2	233733396	233887982	903	1.0744e-07
NAP1L5	4	89607066	89629386	84	1.0862e-07
SATB2	2	200124223	200345989	543	1.1082e-07
WNT10B	12	49349123	49375546	90	1.1721e-07
TUBA1C	12	49572519	49677114	384	1.3401e-07
CDH7	18	63407488	63558638	778	1.4152e-07
RPL6	12	112832994	112866642	84	1.758e-07
FAM172A	5	92943775	93457404	1361	1.807e-07
FERMT3	11	63964150	64001354	150	1.8509e-07
SEMA6D	15	47466298	48076420	2850	1.8794e-07
CLOCK	4	56284070	56423305	688	1.9678e-07
ARF4	3	57547090	57593947	197	2.324e-07
MXRA7	17	74658633	74717098	285	2.3376e-07
DNMT3B	20	31340191	31407162	361	2.3602e-07
ZMIZ2	7	44778180	44819477	152	2.4215e-07
ZKSCAN8	6	28099688	28137250	216	2.7629e-07
ZNF165	6	28038753	28067341	149	2.8528e-07
MIER1	1	67380578	67464302	288	2.9677e-07
CCDC65	12	49287893	49335623	193	3.0054e-07
PLCB3	11	64008995	64046622	123	3.0681e-07
DYNC1I2	2	172533919	172614930	339	3.0923e-07
CAMKMT	2	44579089	45009731	2114	3.1194e-07
TYW5	2	200784698	200830459	141	3.1604e-07
ARF3	12	49319506	49361334	183	3.3395e-07
NR2E1	6	108477262	108520013	161	3.4914e-07
N4BP2	4	40048446	40169872	444	3.5887e-07
FKBP11	12	49305301	49330257	106	3.6483e-07
NDUFB4	3	120305156	120331347	142	3.6887e-07
GPR52	1	174407212	174428683	75	3.7192e-07
C2orf44	2	24242210	24282445	153	3.8171e-07
FAM228A	2	24387938	24433718	205	4.4049e-07
NCF2	1	183514698	183570011	249	5.0611e-07
VSIG2	11	124607368	124632134	92	5.0822e-07
ERP29	12	112441120	112471255	83	5.1583e-07
DERL2	17	5364571	5400131	172	5.1699e-07
TMEM180	10	104211149	104246802	176	5.3016e-07
CCDC92	12	124393207	124467378	334	5.3702e-07
ERI3	1	44676742	44830932	509	6.1072e-07
JMJD6	17	74698919	74732866	179	6.354e-07
KLHL18	3	47314407	47398306	201	6.4763e-07
CIT	12	120113595	120325095	804	6.585e-07
TXNDC16	14	52887308	53029240	523	6.731e-07
CARM1	19	10972189	11043453	226	6.7501e-07
ZDHHC11B	5	700475	777067	202	6.9329e-07
CAMK1G	1	209747062	209797283	283	7.2047e-07
C2orf69	2	200765979	200830658	207	7.3707e-07
CAP2	6	17383447	17568023	945	7.4594e-07
TMEM200A	6	130676879	130774208	485	7.7503e-07
DENND6A	3	57601184	57688816	316	7.9557e-07
KIF9	3	47259516	47334941	211	8.0379e-07
NAV1	1	201582411	201806102	1026	8.935e-07
CCDC85A	2	56401258	56623308	1275	9.0967e-07
DPP4	2	162838751	162941052	385	9.4896e-07
ZSCAN16	6	28082338	28107860	130	9.6546e-07
SNAP91	6	84252599	84429410	628	1.0066e-06
CENPV	17	16235848	16266970	124	1.0146e-06
METTL15	11	28119795	28365054	680	1.1787e-06
GTPBP3	19	17435729	17463544	116	1.1788e-06
SOCS7	17	36498111	36566019	212	1.2473e-06
ACTR1A	10	104228986	104272482	180	1.2644e-06
FRMD4B	3	69209141	69601734	2180	1.3408e-06
GABARAP	17	7133333	7156089	56	1.399e-06
SUFU	10	104253744	104403292	515	1.4245e-06
CD46	1	207915402	207978858	264	1.4594e-06
EXT1	8	118796729	119134092	1483	1.5714e-06
SDCCAG8	1	243409320	243673394	869	1.5874e-06
SETD2	3	47047919	47215457	442	1.6432e-06
RECQL4	8	145726667	145753229	121	1.7254e-06
PLCH1	3	155083369	155472856	1935	1.7396e-06
TMEM229A	7	123660973	123683523	83	1.7734e-06
ATAD2B	2	23961534	24159984	752	1.7755e-06
MIS12	17	5379605	5404134	139	1.779e-06
DLG4	17	7083209	7133021	206	1.8335e-06
THRA	17	38204543	38260120	202	1.8687e-06
UBXN2A	2	24140155	24237779	445	1.8955e-06
GCN1L1	12	120555007	120642513	257	1.9099e-06
C2orf47	2	200810040	200883263	224	1.9581e-06
RNF123	3	49716932	49768962	145	2.012e-06
G3BP1	5	151140606	151202346	212	2.0148e-06
CAMTA1	1	6835384	7839766	4619	2.0458e-06
RABGAP1L	1	174118548	174974445	2989	2.0722e-06
KIAA0825	5	93478671	93964309	1414	2.0752e-06
TOM1L2	17	17736828	17885736	588	2.1111e-06
WNT1	12	49362398	49385459	58	2.1209e-06
SFXN1	5	174894065	174966745	492	2.1427e-06
STX1A	7	73103536	73144002	138	2.3294e-06
MMD	17	53459974	53509353	193	2.3673e-06
H2AFV	7	44856390	44897682	188	2.4097e-06
WFDC3	20	44366583	44430571	367	2.4862e-06
PIAS4	19	3997644	4049384	270	2.5506e-06
HAT1	2	172768958	172858599	387	2.5795e-06
CCNE1	19	30292805	30325215	139	2.6405e-06
ANKUB1	3	149468892	149696172	934	2.6874e-06
