# Supplementary material for: Study of 300,486 individuals identifies 148 independent genetic loci influencing general cognitive function
Source: Nat Commun. 2018 May 29;9:2098. doi: 10.1038/s41467-018-04362-x (PMC5974083; doi:10.1038/s41467-018-04362-x)
Supplement: Supplementary file 17 — Supplementary Data 14 [file 41467_2018_4362_MOESM17_ESM.xlsx]

## Sheet: Sheet1
Supplementary Data 14. MAGMA gene-set analysis for reaction time. Abbreviations: GO, Gene ontology; bp, biological processes; cc, cellular components; mf, molecular functions.
Gene-set Name	Number of genes	Beta	SE	P
GO bp:go positive regulation of dendritic spine morphogenesis	12	1.12	0.315	0.00019215
GO cc:go wnt signalosome	11	1.07	0.309	0.00027747
GO bp:go chromatin organization	600	0.149	0.0435	0.000295
GO bp:go modulation of synaptic transmission	290	0.206	0.0605	0.00032537
Curated gene sets:ikeda mir30 targets dn	27	0.743	0.22	0.00037941
GO mf:go calcium activated potassium channel activity	17	0.86	0.257	0.00041244
Curated gene sets:reactome energy dependent regulation of mtor by lkb1 ampk	17	0.852	0.257	0.00045069
GO bp:go regulation of dendritic spine morphogenesis	27	0.681	0.207	0.00051609
GO cc:go neuron projection	900	0.115	0.0357	0.00061699
GO bp:go chromatin modification	497	0.147	0.0457	0.00063216
GO mf:go kinase binding	589	0.135	0.042	0.0006483
GO bp:go neurogenesis	1356	0.0935	0.0294	0.00072069
GO bp:go regulation of calcium ion dependent exocytosis	79	0.374	0.117	0.00073568
Curated gene sets:schaeffer sox9 targets in prostate development dn	44	0.5	0.157	0.00074063
GO bp:go exploration behavior	23	0.733	0.231	0.00075423
GO mf:go transcriptional repressor activity rna polymerase ii transcription regulatory region sequence specific binding	164	0.26	0.0822	0.00077144
Curated gene sets:kim all disorders oligodendrocyte number corr up	722	0.12	0.0381	0.00080285
GO bp:go regulation of dendrite development	111	0.309	0.098	0.00080469
GO mf:go g protein coupled neurotransmitter receptor activity	14	0.801	0.258	0.0009735
GO cc:go synapse	718	0.122	0.0396	0.0010165
GO bp:go locomotory exploration behavior	11	0.988	0.323	0.0011041
GO bp:go positive regulation of excitatory postsynaptic potential	20	0.696	0.228	0.0011289
GO bp:go regulation of exocytosis	174	0.237	0.0778	0.0011353
GO bp:go protein import	149	0.248	0.0815	0.0011885
Curated gene sets:kegg glycosaminoglycan biosynthesis heparan sulfate	25	0.646	0.213	0.001213
Curated gene sets:reactome regulation of ampk activity via lkb1	14	0.869	0.287	0.0012455
GO bp:go neurotransmitter transport	145	0.262	0.0876	0.0013789
Curated gene sets:blalock alzheimers disease dn	1163	0.0918	0.0307	0.0014112
GO bp:go response to vitamin a	20	0.689	0.232	0.0015016
GO cc:go synapse part	580	0.129	0.0436	0.0015047
GO bp:go regulation of synapse structure or activity	222	0.205	0.0691	0.00152
GO cc:go excitatory synapse	185	0.217	0.0739	0.001641
GO bp:go regulation of vesicle mediated transport	444	0.142	0.0483	0.0016433
GO bp:go regulation of dendritic spine development	51	0.409	0.141	0.0018255
GO mf:go gaba receptor binding	15	0.821	0.283	0.0018835
GO bp:go neuron projection morphogenesis	386	0.158	0.0548	0.0019465
GO bp:go neuron projection development	522	0.135	0.0469	0.0019696
GO bp:go response to estradiol	145	0.246	0.0853	0.001996
Curated gene sets:brachat response to methotrexate dn	25	0.555	0.193	0.0019977
GO bp:go modulation of excitatory postsynaptic potential	28	0.531	0.185	0.0020403
Curated gene sets:graessmann apoptosis by doxorubicin dn	1707	0.0732	0.0257	0.0022045
Curated gene sets:fontaine papillary thyroid carcinoma up	59	0.356	0.126	0.0023088
Curated gene sets:reactome role of second messengers in netrin1 signaling	8	1.1	0.388	0.0023567
GO cc:go postsynapse	355	0.156	0.0554	0.002397
GO bp:go cellular component disassembly	499	0.126	0.045	0.002476
Curated gene sets:hwang prostate cancer markers	26	0.547	0.195	0.0024891
Curated gene sets:natsume response to interferon beta up	69	0.34	0.122	0.0026141
Curated gene sets:zerbini response to sulindac up	9	1.02	0.366	0.0026189
Curated gene sets:hoelzel nf1 targets dn	102	0.299	0.108	0.002766
GO bp:go demethylation	46	0.394	0.142	0.0027979
GO cc:go gaba receptor complex	14	0.973	0.354	0.0030091
Curated gene sets:reactome pkb mediated events	28	0.547	0.199	0.0030367
GO cc:go cation channel complex	162	0.226	0.0828	0.0031303
GO cc:go neuron part	1205	0.0844	0.0309	0.0031711
GO cc:go axonal growth cone	19	0.643	0.237	0.0032811
GO bp:go regulation of dendrite morphogenesis	67	0.352	0.13	0.0034569
GO mf:go single stranded rna binding	63	0.336	0.125	0.00352
Curated gene sets:mcclung delta fosb targets 2wk	48	0.43	0.16	0.0035897
Curated gene sets:wang lsd1 targets dn	35	0.526	0.196	0.0035953
GO mf:go protein c terminus binding	175	0.2	0.0749	0.0037589
GO bp:go dna dealkylation	18	0.603	0.226	0.003806
GO bp:go regulation of neuron differentiation	532	0.12	0.045	0.0039335
Curated gene sets:roversi glioma copy number dn	54	0.468	0.177	0.0040143
Curated gene sets:stark prefrontal cortex 22q11 deletion up	183	0.204	0.077	0.0040865
Curated gene sets:gross hif1a targets dn	24	0.574	0.218	0.0042172
GO bp:go calcium ion regulated exocytosis of neurotransmitter	31	0.517	0.196	0.0042645
Curated gene sets:pujana breast cancer with brca1 mutated dn	9	0.841	0.321	0.0044196
GO bp:go regulation of regulated secretory pathway	121	0.242	0.0923	0.0044237
GO bp:go regulation of collateral sprouting	17	0.677	0.259	0.0044611
GO bp:go regulation of nucleocytoplasmic transport	215	0.181	0.0693	0.0045414
GO bp:go serotonin metabolic process	10	0.82	0.316	0.0047011
Curated gene sets:browne hcmv infection 1hr dn	204	0.18	0.0698	0.0048963
Curated gene sets:reactome cell surface interactions at the vascular wall	83	0.266	0.103	0.0049329
Curated gene sets:reactome the activation of arylsulfatases	8	0.814	0.316	0.004962
GO bp:go positive regulation of dendrite morphogenesis	27	0.545	0.211	0.0049711
GO bp:go dopamine receptor signaling pathway	28	0.48	0.187	0.0050722
GO bp:go regulation of neurotransmitter levels	180	0.198	0.0772	0.0052409
GO bp:go myeloid cell development	41	0.4	0.157	0.0053145
GO bp:go regulation of cytoplasmic transport	462	0.122	0.0477	0.0053197
Curated gene sets:schaeffer prostate development 12hr dn	57	0.359	0.141	0.0053763
GO mf:go deacetylase activity	52	0.348	0.137	0.0055711
Curated gene sets:zhang antiviral response to ribavirin up	25	0.523	0.206	0.0056334
GO mf:go calcium dependent phospholipid binding	52	0.375	0.148	0.0056624
Curated gene sets:reactome ctnnb1 phosphorylation cascade	15	0.706	0.279	0.005738
Curated gene sets:lu ezh2 targets up	275	0.152	0.0602	0.0057414
Curated gene sets:kim all disorders calb1 corr up	521	0.116	0.0457	0.0057462
GO bp:go potassium ion transport	150	0.21	0.0832	0.0057516
GO bp:go synaptic vesicle cycle	86	0.278	0.11	0.0058032
Curated gene sets:myllykangas amplification hot spot 14	3	1.47	0.582	0.0058543
Curated gene sets:zhang response to cantharidin dn	66	0.299	0.119	0.0059072
GO bp:go vocalization behavior	10	0.819	0.327	0.0060726
GO bp:go positive regulation of sodium ion transmembrane transporter activity	10	0.733	0.292	0.0060897
GO bp:go positive regulation of sodium ion transmembrane transport	15	0.614	0.246	0.0061858
GO bp:go synaptic vesicle localization	102	0.253	0.101	0.0062083
GO bp:go positive regulation of dendrite development	57	0.333	0.134	0.0063576
GO bp:go positive regulation of steroid biosynthetic process	13	0.68	0.274	0.0064737
GO bp:go protein import into peroxisome matrix	12	0.789	0.318	0.0065408
GO bp:go negative regulation of cytosolic calcium ion concentration	11	0.798	0.323	0.0066883
Curated gene sets:fujiwara park2 in liver cancer up	8	0.669	0.271	0.0068024
GO mf:go rna polymerase ii carboxy terminal domain kinase activity	16	0.669	0.271	0.0068624
Curated gene sets:reactome formation of the hiv1 early elongation complex	32	0.484	0.197	0.0071526
Curated gene sets:gargalovic response to oxidized phospholipids yellow dn	24	0.561	0.23	0.0073016
Curated gene sets:nikolsky breast cancer 20q11 amplicon	31	0.93	0.381	0.0073393
Curated gene sets:lastowska neuroblastoma copy number dn	787	0.103	0.0425	0.0075467
GO bp:go ncrna 3 end processing	20	0.585	0.242	0.0078002
GO bp:go leukocyte homeostasis	57	0.32	0.132	0.0078204
GO cc:go plasma membrane raft	86	0.274	0.113	0.0078843
Curated gene sets:zamora nos2 targets up	65	0.29	0.12	0.007929
Curated gene sets:reactome vitamin b5 pantothenate metabolism	11	0.697	0.289	0.0079829
GO cc:go somatodendritic compartment	621	0.101	0.0417	0.007984
GO bp:go positive regulation of synaptic transmission	106	0.249	0.104	0.0083706
GO bp:go postsynaptic membrane organization	24	0.501	0.21	0.0085244
Curated gene sets:pid beta catenin nuc pathway	73	0.279	0.117	0.0085964
Curated gene sets:kegg thyroid cancer	29	0.424	0.179	0.0087624
GO bp:go positive regulation of long term synaptic potentiation	14	0.674	0.284	0.008805
Curated gene sets:pid cdc42 reg pathway	25	0.48	0.202	0.008866
GO bp:go gene silencing	201	0.173	0.0732	0.009016
Curated gene sets:urs adipocyte differentiation up	74	0.289	0.122	0.0090558
GO bp:go chromosome organization	929	0.0804	0.034	0.0091193
GO bp:go calcium ion regulated exocytosis	77	0.273	0.116	0.0091629
Curated gene sets:reactome e2f mediated regulation of dna replication	31	0.414	0.176	0.0092338
GO bp:go cellular response to estradiol stimulus	29	0.45	0.191	0.0093694
GO bp:go neuron development	663	0.097	0.0413	0.0094205
Curated gene sets:concannon apoptosis by epoxomicin dn	156	0.198	0.0846	0.0094667
GO cc:go presynaptic active zone	27	0.495	0.211	0.0096044
GO cc:go transporter complex	305	0.144	0.0617	0.0096113
GO bp:go cell morphogenesis involved in neuron differentiation	354	0.133	0.0569	0.0096333
GO bp:go dna demethylation	13	0.658	0.282	0.0097853
GO bp:go neuron migration	105	0.237	0.102	0.0098127
Curated gene sets:kegg regulation of actin cytoskeleton	203	0.163	0.07	0.009893
GO mf:go ionotropic glutamate receptor binding	21	0.534	0.229	0.0099152
GO cc:go nuclear pore	75	0.257	0.11	0.010077
Curated gene sets:corradetti mtor pathway regulators dn	6	0.986	0.425	0.010124
Curated gene sets:reactome dscam interactions	11	0.742	0.32	0.010232
Curated gene sets:mariadason response to curcumin sulindac 7	17	0.566	0.244	0.010259
Curated gene sets:reactome pre notch transcription and translation	26	0.496	0.214	0.010268
GO bp:go regulation of nervous system development	722	0.0904	0.0391	0.010372
GO bp:go regulation of synaptic vesicle exocytosis	18	0.52	0.226	0.010639
Curated gene sets:verrecchia response to tgfb1 c5	21	0.508	0.221	0.010728
Curated gene sets:dairkee cancer prone response e2	28	0.404	0.176	0.010839
Curated gene sets:weber methylated lcp in sperm dn	7	0.743	0.324	0.010964
Curated gene sets:bruins uvc response early late	302	0.137	0.0598	0.011022
Curated gene sets:pid smad2 3pathway	17	0.534	0.234	0.011161
Curated gene sets:reactome gaba a receptor activation	10	0.964	0.422	0.011187
Curated gene sets:reactome regulation of rheb gtpase activity by ampk	10	0.76	0.333	0.011216
GO bp:go cellular response to vascular endothelial growth factor stimulus	30	0.429	0.188	0.011302
Curated gene sets:ikeda mir30 targets up	112	0.233	0.102	0.011324
GO bp:go regulation of short term neuronal synaptic plasticity	13	0.68	0.298	0.011331
Curated gene sets:pid lkb1 pathway	46	0.339	0.149	0.011381
GO bp:go regulation of transport	1738	0.058	0.0255	0.011513
GO cc:go cell junction	1102	0.0724	0.0319	0.011636
GO cc:go cell body	476	0.108	0.0476	0.011641
GO bp:go peptidyl lysine modification	291	0.129	0.0567	0.011708
GO bp:go rrna modification	24	0.494	0.218	0.011748
Curated gene sets:reactome late phase of hiv life cycle	98	0.231	0.102	0.011816
GO bp:go reactive oxygen species biosynthetic process	21	0.483	0.214	0.011845
GO mf:go heparan sulfate sulfotransferase activity	14	0.678	0.3	0.011928
GO mf:go clathrin binding	61	0.313	0.139	0.012087
GO bp:go synaptic signaling	404	0.118	0.0525	0.012164
GO bp:go synapse assembly	61	0.315	0.14	0.012192
Curated gene sets:nielsen leiomyosarcoma up	17	0.543	0.241	0.012251
GO bp:go positive regulation of steroid metabolic process	23	0.467	0.208	0.012291
GO bp:go presynaptic process involved in synaptic transmission	109	0.222	0.0987	0.012328
Curated gene sets:lee metastasis and alternative splicing dn	43	0.364	0.162	0.012358
GO bp:go regulation of synaptic vesicle transport	28	0.433	0.193	0.012383
Curated gene sets:brachat response to camptothecin dn	43	0.333	0.148	0.01239
GO mf:go gaba receptor activity	18	0.669	0.298	0.012514
Curated gene sets:reactome post chaperonin tubulin folding pathway	19	0.548	0.245	0.012612
Curated gene sets:rorie targets of ewsr1 fli1 fusion dn	27	0.45	0.201	0.012635
Curated gene sets:reactome ligand gated ion channel transport	18	0.652	0.292	0.012665
GO bp:go positive regulation of synapse maturation	11	0.748	0.334	0.012677
Curated gene sets:zhang gata6 targets up	13	0.618	0.277	0.012768
GO bp:go covalent chromatin modification	312	0.127	0.0568	0.01285
Curated gene sets:hahtola ctcl cutaneous	25	0.458	0.205	0.012978
Curated gene sets:iizuka liver cancer progression l1 g1 dn	12	0.682	0.306	0.013017
GO bp:go vasculogenesis	57	0.307	0.138	0.01303
GO bp:go regulation of neuronal synaptic plasticity	48	0.326	0.147	0.013119
GO bp:go negative regulation of nervous system development	252	0.146	0.0659	0.013194
Curated gene sets:wnt signaling	87	0.253	0.114	0.013207
GO bp:go hindlimb morphogenesis	36	0.417	0.188	0.013241
Curated gene sets:stambolsky targets of mutated tp53 up	46	0.335	0.151	0.013319
GO bp:go trna transport	34	0.344	0.155	0.013349
Curated gene sets:kegg long term depression	68	0.292	0.132	0.013529
GO bp:go protein sumoylation	111	0.198	0.0897	0.013635
Curated gene sets:begum targets of pax3 foxo1 fusion up	56	0.331	0.15	0.013697
Curated gene sets:guillaumond klf10 targets dn	29	0.413	0.187	0.013724
GO bp:go head development	674	0.0894	0.0406	0.013789
GO mf:go superoxide generating nadph oxidase activity	7	0.799	0.363	0.013873
Curated gene sets:falvella smokers with lung cancer	73	0.273	0.124	0.013985
Curated gene sets:scheidereit ikk targets	18	0.566	0.258	0.014002
GO bp:go corpus callosum development	11	0.782	0.356	0.014104
Curated gene sets:jiang hypoxia normal	294	0.128	0.0585	0.014146
Curated gene sets:concannon apoptosis by epoxomicin up	224	0.149	0.0681	0.01426
Curated gene sets:wang response to forskolin dn	9	0.769	0.351	0.014334
GO mf:go dna dependent atpase activity	76	0.251	0.115	0.014343
Curated gene sets:kenny ctnnb1 targets dn	51	0.29	0.132	0.014344
Curated gene sets:mcclung creb1 targets up	97	0.244	0.112	0.01435
Curated gene sets:mariadason response to butyrate curcumin sulindac tsa 2	8	0.728	0.334	0.014508
Curated gene sets:valk aml cluster 12	25	0.472	0.216	0.014523
Curated gene sets:ivanova hematopoiesis stem cell and progenitor	648	0.0878	0.0403	0.014587
GO mf:go androgen receptor binding	39	0.382	0.175	0.014617
Curated gene sets:farmer breast cancer cluster 7	19	0.473	0.218	0.014916
Curated gene sets:eppert lsc r	37	0.355	0.163	0.014925
Curated gene sets:park hsc vs multipotent progenitors dn	17	0.473	0.218	0.015141
GO mf:go potassium ion transmembrane transporter activity	139	0.187	0.0865	0.015142
GO bp:go t cell homeostasis	31	0.373	0.172	0.015153
GO bp:go adenylate cyclase activating dopamine receptor signaling pathway	12	0.593	0.274	0.015169
GO cc:go cell cell junction	364	0.117	0.0544	0.015411
GO mf:go ion gated channel activity	43	0.332	0.154	0.015581
Curated gene sets:senese hdac1 targets dn	234	0.142	0.066	0.015617
GO bp:go cellular response to stress	1506	0.0581	0.027	0.015861
GO bp:go primary amino compound metabolic process	13	0.605	0.282	0.015885
GO bp:go negative regulation of cell morphogenesis involved in differentiation	110	0.207	0.0965	0.01597
GO cc:go cyclin dependent protein kinase holoenzyme complex	29	0.474	0.221	0.016091
Curated gene sets:biocarta pitx2 pathway	15	0.523	0.244	0.016137
Curated gene sets:gobert oligodendrocyte differentiation dn	1038	0.0711	0.0332	0.016169
GO bp:go androgen receptor signaling pathway	38	0.386	0.181	0.016264
GO cc:go nuclear envelope	400	0.105	0.0495	0.016666
GO mf:go demethylase activity	28	0.386	0.182	0.016805
Curated gene sets:gross elk3 targets dn	32	0.386	0.182	0.017008
GO mf:go transmembrane receptor protein phosphatase activity	16	0.593	0.28	0.017009
Curated gene sets:reactome transport of ribonucleoproteins into the host nucleus	27	0.369	0.174	0.017039
GO mf:go histone demethylase activity	20	0.469	0.221	0.017171
GO cc:go potassium channel complex	88	0.229	0.108	0.017191
GO cc:go site of polarized growth	140	0.184	0.0868	0.017214
Curated gene sets:reactome regulation of glucokinase by glucokinase regulatory protein	27	0.375	0.177	0.017281
GO bp:go rna secondary structure unwinding	41	0.314	0.149	0.01731
GO bp:go negative regulation of astrocyte differentiation	12	0.666	0.315	0.017313
GO bp:go positive regulation of activated t cell proliferation	27	0.426	0.202	0.017403
Curated gene sets:reactome trafficking of glur2 containing ampa receptors	13	0.621	0.294	0.017421
Curated gene sets:dairkee cancer prone response bpa e2	112	0.201	0.0953	0.01745
Curated gene sets:kegg glycolysis gluconeogenesis	57	0.295	0.14	0.017534
GO bp:go regulation of potassium ion transport	81	0.248	0.118	0.017552
Curated gene sets:amit egf response 40 mcf10a	19	0.496	0.236	0.017582
Curated gene sets:wang tumor invasiveness dn	203	0.15	0.0711	0.017678
GO bp:go long term synaptic potentiation	37	0.372	0.177	0.017695
GO cc:go postsynaptic membrane	188	0.166	0.0794	0.018046
Curated gene sets:kegg vegf signaling pathway	77	0.235	0.112	0.018058
GO cc:go ribonucleoprotein granule	143	0.174	0.0831	0.018145
GO bp:go regulation of protein import	178	0.161	0.0769	0.018157
GO bp:go positive regulation of protein import into nucleus translocation	13	0.631	0.301	0.018183
GO bp:go synapse organization	131	0.196	0.0938	0.01827
GO mf:go molecular function regulator	1284	0.0612	0.0293	0.018305
GO bp:go rna destabilization	16	0.458	0.219	0.018471
GO bp:go negative regulation of glial cell differentiation	25	0.468	0.224	0.018515
GO mf:go enzyme binding	1670	0.0544	0.0261	0.018659
GO bp:go erythrocyte development	22	0.44	0.212	0.018804
GO bp:go negative regulation of neuron differentiation	183	0.16	0.0769	0.018869
Curated gene sets:hoebeke lymphoid stem cell up	90	0.224	0.108	0.018917
GO bp:go potassium ion homeostasis	18	0.501	0.242	0.019042
GO bp:go regulation of synaptic plasticity	136	0.176	0.0848	0.019114
Curated gene sets:hahtola mycosis fungoides cd4 up	61	0.272	0.131	0.019165
GO bp:go regulation of transcription factor import into nucleus	91	0.215	0.104	0.019227
GO bp:go protein transmembrane transport	50	0.305	0.148	0.01923
GO bp:go single organism behavior	372	0.112	0.0543	0.019273
GO mf:go oxidoreductase activity acting on nad p h oxygen as acceptor	11	0.664	0.322	0.019485
GO bp:go superoxide metabolic process	30	0.375	0.181	0.019515
GO bp:go central nervous system projection neuron axonogenesis	21	0.486	0.236	0.019522
Curated gene sets:holleman daunorubicin b all up	10	0.665	0.322	0.019539
Curated gene sets:biocarta longevity pathway	15	0.614	0.298	0.019557
GO bp:go response to food	18	0.46	0.223	0.019588
Curated gene sets:schaeffer prostate development and cancer box2 up	6	0.883	0.428	0.019598
GO mf:go cyclin binding	19	0.497	0.241	0.019658
GO bp:go regulation of neuron projection development	388	0.107	0.0519	0.019833
GO bp:go respiratory burst	12	0.564	0.275	0.020254
GO bp:go gamma aminobutyric acid signaling pathway	20	0.53	0.259	0.020294
GO bp:go regulation of activated t cell proliferation	38	0.341	0.166	0.020339
GO bp:go positive regulation of dendritic spine development	31	0.356	0.174	0.020529
Curated gene sets:mann response to amifostine dn	10	0.743	0.364	0.020567
Curated gene sets:holleman daunorubicin all up	7	0.795	0.389	0.020607
Curated gene sets:reactome hiv infection	188	0.144	0.0709	0.020927
Curated gene sets:cui tcf21 targets 2 up	406	0.104	0.0513	0.020936
GO bp:go morphogenesis of an epithelial sheet	42	0.313	0.154	0.021133
GO bp:go nuclear import	127	0.175	0.0862	0.021316
GO cc:go cytoplasmic stress granule	29	0.376	0.186	0.021321
GO bp:go centromere complex assembly	46	0.295	0.145	0.021413
Curated gene sets:nikolsky breast cancer 19q13.1 amplicon	22	0.824	0.407	0.021425
GO mf:go ubiquitin like protein conjugating enzyme activity	28	0.397	0.196	0.021531
Curated gene sets:gargalovic response to oxidized phospholipids green up	23	0.459	0.227	0.021564
GO bp:go stabilization of membrane potential	16	0.524	0.259	0.021624
GO bp:go protein dealkylation	23	0.385	0.191	0.021841
GO bp:go protein demethylation	23	0.385	0.191	0.021841
Curated gene sets:pid lysophospholipid pathway	65	0.261	0.129	0.021912
Curated gene sets:meissner brain hcp with h3k4me2	16	0.46	0.228	0.021988
Curated gene sets:reactome nep ns2 interacts with the cellular export machinery	27	0.356	0.177	0.02205
Curated gene sets:mullighan mll signature 1 dn	230	0.137	0.0682	0.022058
GO bp:go regulation of synapse organization	105	0.212	0.106	0.022105
GO cc:go pcg protein complex	39	0.319	0.159	0.02212
Curated gene sets:cadwell atg16l1 targets dn	66	0.255	0.127	0.022253
GO mf:go organic acid sodium symporter activity	28	0.407	0.203	0.022317
Curated gene sets:reactome pre notch expression and processing	41	0.339	0.169	0.022347
Curated gene sets:reactome formation of rna pol ii elongation complex	42	0.331	0.165	0.022374
Curated gene sets:gentile uv response cluster d4	54	0.309	0.154	0.022496
Curated gene sets:amit serum response 60 mcf10a	55	0.296	0.148	0.02254
Curated gene sets:biocarta mcm pathway	18	0.391	0.195	0.022582
Curated gene sets:chicas rb1 targets senescent	539	0.0867	0.0433	0.02263
GO bp:go cellular response to superoxide	13	0.547	0.273	0.022648
GO bp:go cellular response to oxygen radical	13	0.547	0.273	0.022648
GO bp:go regulation of cellular localization	1225	0.0594	0.0297	0.022811
GO bp:go membrane docking	67	0.238	0.119	0.022897
GO cc:go calcium channel complex	60	0.281	0.141	0.023038
Curated gene sets:gross hypoxia via elk3 only dn	43	0.311	0.156	0.023088
GO bp:go cellular response to alcohol	112	0.191	0.0959	0.023116
GO bp:go intracellular steroid hormone receptor signaling pathway	67	0.259	0.13	0.023205
Curated gene sets:cui tcf21 targets up	36	0.371	0.186	0.023264
GO bp:go negative regulation of cellular component organization	645	0.078	0.0392	0.023416
GO bp:go hormone mediated signaling pathway	152	0.171	0.0861	0.023432
GO bp:go jak stat cascade involved in growth hormone signaling pathway	15	0.566	0.285	0.023513
GO bp:go transcription elongation from rna polymerase ii promoter	79	0.245	0.123	0.023517
Curated gene sets:boyault liver cancer subclass g2	26	0.372	0.188	0.023634
GO bp:go vascular smooth muscle cell differentiation	13	0.574	0.289	0.023676
GO bp:go epiboly	22	0.42	0.212	0.023754
GO bp:go neuromuscular process controlling balance	51	0.283	0.143	0.023776
GO mf:go calcium dependent protein binding	58	0.291	0.147	0.023861
GO mf:go calcium activated cation channel activity	28	0.36	0.182	0.024059
GO bp:go lymphocyte homeostasis	47	0.287	0.145	0.024108
Curated gene sets:pid anthrax pathway	17	0.541	0.274	0.024275
GO mf:go transcriptional repressor activity rna polymerase ii core promoter proximal region sequence specific binding	104	0.202	0.103	0.024375
Curated gene sets:biocarta p53 pathway	16	0.498	0.253	0.024529
GO bp:go negative regulation of cell development	291	0.12	0.0612	0.024545
Curated gene sets:abe vegfa targets 30min	28	0.344	0.175	0.024554
Curated gene sets:park apl pathogenesis up	14	0.547	0.278	0.024584
Curated gene sets:reactome dopamine neurotransmitter release cycle	9	0.66	0.336	0.024662
GO bp:go positive regulation of neuron death	64	0.247	0.126	0.024973
GO cc:go podosome	23	0.421	0.215	0.02505
Curated gene sets:sheth liver cancer vs txnip loss pam4	243	0.13	0.0662	0.025177
Curated gene sets:reactome host interactions of hiv factors	118	0.167	0.0854	0.025468
Curated gene sets:peart hdac proliferation cluster up	56	0.259	0.133	0.025481
GO bp:go negative regulation of axonogenesis	60	0.26	0.133	0.025541
GO bp:go regulation of intracellular transport	597	0.0803	0.0412	0.025575
Curated gene sets:reactome g1 s specific transcription	16	0.461	0.236	0.025601
GO mf:go potassium channel activity	117	0.183	0.0942	0.025825
Curated gene sets:karlsson tgfb1 targets dn	200	0.139	0.0715	0.025981
Curated gene sets:kegg amyotrophic lateral sclerosis als	52	0.257	0.132	0.026237
GO bp:go cerebral cortex radial glia guided migration	18	0.469	0.242	0.026388
GO bp:go telencephalon glial cell migration	18	0.469	0.242	0.026388
GO bp:go response to estrogen	214	0.137	0.0711	0.02665
Curated gene sets:pid epha fwdpathway	35	0.324	0.168	0.026811
Curated gene sets:reactome rora activates circadian expression	23	0.406	0.211	0.026935
GO mf:go syntaxin binding	86	0.213	0.111	0.027088
GO mf:go hormone binding	63	0.245	0.127	0.027146
Curated gene sets:kegg axon guidance	124	0.176	0.0918	0.027291
GO bp:go regulation of receptor internalization	36	0.33	0.172	0.027444
Curated gene sets:reactome hiv life cycle	111	0.181	0.0942	0.027604
GO bp:go organelle disassembly	177	0.145	0.0759	0.027606
GO bp:go nucleoside diphosphate metabolic process	76	0.208	0.109	0.027925
Curated gene sets:schaeffer prostate development and cancer box1 up	14	0.469	0.246	0.028072
GO bp:go ketone biosynthetic process	25	0.36	0.188	0.028115
Curated gene sets:browne hcmv infection 12hr up	107	0.189	0.0992	0.028164
GO mf:go monovalent inorganic cation transmembrane transporter activity	353	0.106	0.0555	0.028168
Curated gene sets:graham cml quiescent vs cml dividing dn	11	0.503	0.263	0.028199
Curated gene sets:reactome protein folding	50	0.282	0.148	0.028208
Curated gene sets:ding lung cancer mutated frequently	13	0.517	0.271	0.028324
GO mf:go steroid hormone receptor binding	79	0.228	0.119	0.028342
Curated gene sets:gargalovic response to oxidized phospholipids black dn	11	0.591	0.31	0.028563
GO bp:go heparan sulfate proteoglycan biosynthetic process	22	0.41	0.216	0.028599
Curated gene sets:sasson response to gonadotrophins up	84	0.219	0.115	0.028676
GO bp:go regulation of myeloid cell apoptotic process	24	0.372	0.196	0.028807
GO cc:go synaptic membrane	242	0.132	0.0696	0.028858
Curated gene sets:yang breast cancer esr1 bulk up	28	0.368	0.195	0.029156
Curated gene sets:reactome interactions of vpr with host cellular proteins	30	0.314	0.166	0.029259
Curated gene sets:heidenblad amplicon 8q24 up	37	0.287	0.152	0.029275
Curated gene sets:bhat esr1 targets via akt1 up	277	0.117	0.0616	0.029302
Curated gene sets:zhong response to azacitidine and tsa dn	64	0.227	0.12	0.029334
GO bp:go negative regulation of receptor mediated endocytosis	16	0.459	0.243	0.029368
GO mf:go glycoprotein binding	96	0.186	0.0987	0.029502
GO bp:go behavior	498	0.0896	0.0475	0.02971
GO bp:go negative regulation of b cell apoptotic process	12	0.549	0.292	0.030042
GO mf:go rrna methyltransferase activity	13	0.561	0.299	0.030095
GO bp:go peroxisomal transport	16	0.481	0.256	0.030099
Curated gene sets:sig pip3 signaling in cardiac myoctes	63	0.24	0.128	0.030198
GO cc:go neuron projection terminus	120	0.181	0.0964	0.030355
GO bp:go neuron differentiation	843	0.0697	0.0373	0.030769
GO bp:go transcription initiation from rna polymerase ii promoter	142	0.169	0.0904	0.030851
GO bp:go regulation of protein export from nucleus	32	0.335	0.179	0.030852
Curated gene sets:nelson response to androgen up	83	0.225	0.12	0.030918
Curated gene sets:nikolsky breast cancer 17q21 q25 amplicon	331	0.196	0.105	0.030988
GO bp:go rrna 3 end processing	13	0.619	0.332	0.03106
GO bp:go developmental cell growth	71	0.224	0.12	0.031172
Curated gene sets:he pten targets dn	7	0.722	0.388	0.031372
Curated gene sets:reactome ptm gamma carboxylation hypusine formation and arylsulfatase activation	21	0.354	0.19	0.031586
Curated gene sets:abe vegfa targets	19	0.435	0.234	0.031679
GO bp:go response to axon injury	46	0.276	0.149	0.031832
GO bp:go positive regulation of interleukin 10 production	28	0.374	0.202	0.031983
Curated gene sets:reactome loss of nlp from mitotic centrosomes	54	0.232	0.125	0.032117
Curated gene sets:reactome glucose transport	37	0.293	0.159	0.032181
GO bp:go steroid hormone mediated signaling pathway	119	0.178	0.0961	0.032196
GO bp:go muscle atrophy	10	0.596	0.322	0.032205
GO bp:go nucleobase containing compound transport	182	0.133	0.0722	0.032254
GO cc:go transcription elongation factor complex	49	0.273	0.148	0.032401
Curated gene sets:hoshida liver cancer late recurrence up	58	0.232	0.126	0.032468
Curated gene sets:qi hypoxia	136	0.155	0.0839	0.03265
GO bp:go protein import into mitochondrial matrix	13	0.465	0.252	0.032665
Curated gene sets:ceballos targets of tp53 and myc dn	36	0.31	0.168	0.032714
GO bp:go oxidoreduction coenzyme metabolic process	100	0.184	0.0998	0.032822
GO bp:go acrosome assembly	13	0.556	0.302	0.032827
GO bp:go regulation of regulatory t cell differentiation	12	0.519	0.282	0.032861
GO bp:go regulation of monocyte differentiation	14	0.587	0.319	0.032921
GO bp:go regulation of transmission of nerve impulse	13	0.576	0.313	0.032964
GO bp:go regulation of cardiac muscle contraction by calcium ion signaling	21	0.46	0.25	0.033078
GO bp:go positive regulation of neuron migration	10	0.65	0.354	0.033135
GO bp:go cellular response to nitrogen starvation	10	0.519	0.283	0.033435
GO bp:go cellular response to nitrogen levels	10	0.519	0.283	0.033435
GO bp:go kinetochore organization	12	0.653	0.356	0.033449
GO bp:go establishment of epithelial cell polarity	23	0.419	0.229	0.033471
GO bp:go midgut development	13	0.521	0.285	0.033618
GO cc:go condensed chromosome centromeric region	96	0.177	0.0966	0.033678
Curated gene sets:hahtola mycosis fungoides up	19	0.427	0.234	0.033969
Curated gene sets:pid p38 alpha beta downstream pathway	37	0.312	0.171	0.034109
Curated gene sets:smirnov response to ir 6hr up	160	0.147	0.0808	0.034246
GO bp:go synaptic vesicle recycling	22	0.397	0.218	0.034267
Curated gene sets:kim bipolar disorder oligodendrocyte density corr up	642	0.0739	0.0406	0.034328
GO bp:go negative regulation of dendritic spine development	10	0.603	0.331	0.034345
GO cc:go membrane microdomain	280	0.112	0.0618	0.034501
GO mf:go arylsulfatase activity	8	0.592	0.325	0.034523
GO bp:go reflex	20	0.467	0.257	0.034579
GO bp:go lens development in camera type eye	64	0.237	0.131	0.034722
GO bp:go locomotion	1082	0.0588	0.0324	0.034726
GO cc:go external encapsulating structure	10	0.514	0.283	0.034791
Curated gene sets:biocarta cell2cell pathway	12	0.518	0.286	0.035151
GO bp:go regulation of neuron migration	28	0.383	0.211	0.035183
GO cc:go chromocenter	13	0.455	0.251	0.035224
Curated gene sets:reactome amine derived hormones	15	0.502	0.277	0.035332
Curated gene sets:nikolsky breast cancer 12q24 amplicon	15	0.783	0.433	0.035423
GO bp:go negative regulation of transcription elongation from rna polymerase ii promoter	11	0.521	0.289	0.03576
GO bp:go response to low density lipoprotein particle	14	0.49	0.272	0.03576
Curated gene sets:nikolsky breast cancer 16p13 amplicon	120	0.354	0.196	0.035775
GO mf:go gated channel activity	305	0.111	0.0614	0.035823
GO bp:go negative regulation of axon guidance	25	0.372	0.207	0.036096
Curated gene sets:kegg ether lipid metabolism	33	0.341	0.19	0.036137
GO bp:go ephrin receptor signaling pathway	84	0.198	0.11	0.036138
GO bp:go import into cell	37	0.321	0.179	0.03626
GO cc:go dna directed rna polymerase ii holoenzyme	92	0.189	0.105	0.036373
Curated gene sets:lein localized to distal and proximal dendrites	17	0.43	0.24	0.036413
GO bp:go regulation of receptor mediated endocytosis	77	0.211	0.118	0.0366
Curated gene sets:reactome rna pol ii pre transcription events	56	0.263	0.147	0.036743
GO bp:go response to follicle stimulating hormone	10	0.624	0.349	0.036818
GO bp:go regulation of cell migration involved in sprouting angiogenesis	18	0.414	0.231	0.037027
GO bp:go negative regulation of glycoprotein metabolic process	14	0.499	0.28	0.037059
GO bp:go regulation of cell development	808	0.0657	0.0368	0.03735
Curated gene sets:cheng imprinted by estradiol	105	0.174	0.0978	0.037728
Curated gene sets:rome insulin targets in muscle dn	175	0.137	0.077	0.037855
Curated gene sets:winter hypoxia metagene	223	0.121	0.0682	0.037967
GO bp:go regulation of b cell apoptotic process	17	0.422	0.238	0.037985
GO bp:go cellular response to growth hormone stimulus	20	0.441	0.249	0.038193
GO bp:go circadian rhythm	134	0.156	0.0883	0.038323
Curated gene sets:kegg mapk signaling pathway	256	0.111	0.0628	0.038324
GO bp:go membrane disassembly	46	0.248	0.14	0.038369
GO bp:go nuclear envelope disassembly	46	0.248	0.14	0.038369
Curated gene sets:figueroa aml methylation cluster 6 up	132	0.158	0.0894	0.038525
Curated gene sets:pid mtor 4pathway	67	0.211	0.119	0.03871
GO cc:go polysome	39	0.281	0.159	0.038785
GO bp:go regulation of potassium ion transmembrane transport	59	0.236	0.133	0.038801
Curated gene sets:coller myc targets dn	8	0.734	0.416	0.038872
Curated gene sets:udayakumar med1 targets dn	222	0.118	0.0671	0.038882
GO bp:go limbic system development	93	0.185	0.105	0.038929
GO bp:go response to mitochondrial depolarisation	131	0.156	0.0886	0.038975
GO bp:go mitophagy in response to mitochondrial depolarization	131	0.156	0.0886	0.038975
GO bp:go macromitophagy	131	0.156	0.0886	0.038975
Curated gene sets:marson foxp3 targets stimulated dn	11	0.538	0.305	0.039092
Curated gene sets:reactome growth hormone receptor signaling	23	0.411	0.234	0.039504
GO bp:go manganese ion transport	13	0.545	0.31	0.039549
Curated gene sets:reactome metabolism of vitamins and cofactors	49	0.268	0.153	0.039609
GO cc:go dna directed rna polymerase ii core complex	18	0.434	0.247	0.039647
GO bp:go protein homotrimerization	18	0.458	0.261	0.039807
GO bp:go regulation of cell projection organization	536	0.0777	0.0443	0.039842
GO cc:go kinetochore	113	0.158	0.09	0.039985
Curated gene sets:biocarta gaba pathway	9	0.652	0.373	0.04
Curated gene sets:reactome glycosphingolipid metabolism	31	0.307	0.176	0.04028
GO bp:go rrna methylation	17	0.453	0.26	0.040684
GO mf:go scaffold protein binding	41	0.29	0.166	0.040821
GO bp:go regulation of peptide transport	244	0.117	0.0673	0.040902
GO bp:go cellular response to ketone	70	0.219	0.126	0.040937
GO bp:go dna methylation or demethylation	55	0.232	0.134	0.041061
GO bp:go vascular endothelial growth factor receptor signaling pathway	74	0.209	0.12	0.041075
GO bp:go vesicle localization	215	0.118	0.0678	0.041095
GO mf:go voltage gated cation channel activity	127	0.156	0.0897	0.0411
Curated gene sets:fujiwara park2 hepatocyte proliferation dn	7	0.721	0.415	0.041263
GO mf:go ligand dependent nuclear receptor binding	23	0.374	0.216	0.041317
GO bp:go clathrin mediated endocytosis	34	0.303	0.175	0.041497
Curated gene sets:golub all vs aml dn	24	0.38	0.219	0.041582
GO bp:go response to lipoprotein particle	20	0.373	0.215	0.041627
GO mf:go metal ion transmembrane transporter activity	399	0.0917	0.0529	0.041707
GO mf:go intramolecular transferase activity phosphotransferases	10	0.526	0.304	0.041756
Curated gene sets:dawson methylated in lymphoma tcl1	58	0.267	0.155	0.041811
GO bp:go smooth muscle cell differentiation	30	0.344	0.199	0.04184
GO bp:go negative regulation of protein complex assembly	103	0.17	0.0981	0.041867
Curated gene sets:reactome role of dcc in regulating apoptosis	9	0.606	0.351	0.041904
Curated gene sets:stanhill hras transfromation up	8	0.662	0.383	0.041934
GO bp:go regulation of long term synaptic potentiation	18	0.429	0.249	0.042001
Curated gene sets:hoffmann pre bi to large pre bii lymphocyte dn	73	0.192	0.111	0.042019
Curated gene sets:bhat esr1 targets not via akt1 up	205	0.126	0.0731	0.042167
GO bp:go ribonucleoside diphosphate metabolic process	57	0.214	0.124	0.042179
GO bp:go phosphatidylcholine acyl chain remodeling	25	0.361	0.209	0.042201
Curated gene sets:johnstone parvb targets 3 dn	862	0.0602	0.0349	0.042398
GO bp:go positive regulation of histone methylation	32	0.307	0.178	0.042439
Curated gene sets:st interferon gamma pathway	10	0.628	0.365	0.042571
GO bp:go negative regulation of cell projection organization	136	0.15	0.0874	0.04259
GO bp:go regulation of sphingolipid biosynthetic process	13	0.508	0.295	0.042754
GO bp:go regulation of membrane lipid metabolic process	13	0.508	0.295	0.042754
Curated gene sets:missiaglia regulated by methylation up	116	0.163	0.0949	0.042848
GO bp:go detoxification	74	0.204	0.119	0.042912
Curated gene sets:martinelli immature neutrophil up	10	0.46	0.268	0.042926
GO bp:go regulation of receptor binding	17	0.463	0.269	0.042945
Curated gene sets:sasson response to forskolin up	83	0.197	0.115	0.043134
Curated gene sets:ramaswamy metastasis up	63	0.219	0.128	0.043162
GO bp:go intracellular protein transport	747	0.0644	0.0376	0.043249
GO cc:go membrane region	1086	0.0551	0.0321	0.04327
Curated gene sets:kegg oocyte meiosis	107	0.174	0.102	0.043293
GO mf:go receptor regulator activity	44	0.271	0.158	0.04332
GO bp:go dna metabolic process	720	0.0647	0.0378	0.043341
GO bp:go homeostasis of number of cells	168	0.134	0.0786	0.043517
GO bp:go layer formation in cerebral cortex	13	0.489	0.286	0.043528
GO bp:go monosaccharide biosynthetic process	49	0.257	0.15	0.043661
Curated gene sets:smid breast cancer relapse in lung dn	37	0.273	0.16	0.043741
GO cc:go presynapse	273	0.106	0.0618	0.043813
Curated gene sets:dutertre estradiol response 24hr dn	486	0.0812	0.0477	0.044447
Curated gene sets:reactome regulatory rna pathways	25	0.409	0.24	0.044487
GO mf:go narrow pore channel activity	17	0.426	0.251	0.044589
Curated gene sets:willert wnt signaling	22	0.42	0.247	0.044608
Curated gene sets:doane breast cancer classes up	66	0.211	0.124	0.044613
Curated gene sets:ongusaha brca1 targets dn	14	0.405	0.238	0.044728
GO bp:go neuron projection extension	48	0.249	0.147	0.044827
GO mf:go cation amino acid symporter activity	16	0.485	0.286	0.044832
GO mf:go neurotransmitter receptor activity	64	0.224	0.132	0.044865
GO bp:go negative regulation of g protein coupled receptor protein signaling pathway	39	0.284	0.167	0.045176
Curated gene sets:pid beta catenin deg pathway	17	0.399	0.235	0.045246
GO bp:go regulation of dna templated transcription elongation	42	0.237	0.14	0.045403
Curated gene sets:liu prostate cancer up	88	0.188	0.111	0.045533
GO cc:go ribonucleoprotein complex	689	0.0658	0.0389	0.045563
Curated gene sets:boquest stem cell dn	213	0.123	0.0727	0.045622
GO bp:go negative regulation of actin filament bundle assembly	17	0.439	0.26	0.045695
Curated gene sets:li cisplatin resistance dn	32	0.316	0.188	0.04591
Curated gene sets:marson foxp3 targets stimulated up	28	0.344	0.204	0.045949
GO bp:go macromolecular complex disassembly	181	0.125	0.074	0.046056
Curated gene sets:korkola seminoma up	33	0.34	0.202	0.046086
Curated gene sets:shedden lung cancer poor survival a6	444	0.0793	0.0472	0.046327
GO bp:go adp metabolic process	43	0.239	0.142	0.046586
GO bp:go regulation of extracellular matrix assembly	11	0.514	0.306	0.046649
Curated gene sets:reactome transcriptional regulation of white adipocyte differentiation	69	0.192	0.115	0.046802
GO mf:go helicase activity	146	0.135	0.0806	0.046868
Curated gene sets:jiang tip30 targets dn	23	0.378	0.226	0.047088
Curated gene sets:pid il2 1pathway	54	0.223	0.133	0.047511
Curated gene sets:wattel autonomous thyroid adenoma up	68	0.206	0.123	0.047575
GO bp:go neuromuscular process	96	0.178	0.107	0.047701
GO bp:go fc gamma receptor signaling pathway	72	0.205	0.123	0.047951
Curated gene sets:reactome binding and entry of hiv virion	4	0.807	0.485	0.048002
GO bp:go antigen processing and presentation of peptide antigen via mhc class i	91	0.172	0.103	0.04805
Curated gene sets:mootha glycolysis	18	0.351	0.211	0.048268
GO cc:go cell projection	1713	0.0432	0.026	0.048332
GO mf:go potassium channel regulator activity	45	0.255	0.154	0.048427
GO bp:go protein targeting	390	0.0855	0.0515	0.048507
Curated gene sets:chin breast cancer copy number dn	14	0.392	0.236	0.048521
Curated gene sets:creighton endocrine therapy resistance 3	685	0.0669	0.0403	0.048576
GO bp:go neuron projection guidance	198	0.125	0.0755	0.04871
GO bp:go mitotic cell cycle	744	0.0608	0.0367	0.048822
Curated gene sets:yemelyanov gr targets dn	9	0.567	0.343	0.048857
GO bp:go regulation of chromatin binding	17	0.371	0.225	0.049527
Curated gene sets:peng rapamycin response dn	231	0.109	0.0658	0.049547
Curated gene sets:moreaux multiple myeloma by taci dn	169	0.128	0.0777	0.049557
Curated gene sets:fontaine follicular thyroid adenoma dn	62	0.218	0.132	0.049589
GO bp:go negative regulation of acute inflammatory response	12	0.539	0.327	0.04968
GO bp:go regulation of removal of superoxide radicals	9	0.497	0.302	0.049699
GO cc:go dendrite	430	0.0825	0.0501	0.049726
Curated gene sets:pid il23 pathway	37	0.258	0.156	0.049842
GO bp:go proteoglycan biosynthetic process	55	0.234	0.142	0.050009
GO bp:go positive regulation of histone h3 k4 methylation	15	0.41	0.249	0.050051
Curated gene sets:ouillette cll 13q14 deletion up	72	0.2	0.121	0.050097
GO mf:go glutamate receptor binding	35	0.284	0.173	0.050309
GO bp:go regulation of cardiac muscle contraction by regulation of the release of sequestered calcium ion	17	0.451	0.275	0.050354
GO bp:go regulation of autophagosome assembly	31	0.278	0.169	0.050355
GO bp:go regulation of extracellular matrix organization	29	0.301	0.183	0.050358
GO bp:go regulation of cell cell adhesion mediated by cadherin	11	0.563	0.343	0.050433
Curated gene sets:reactome cdc6 association with the orc origin complex	11	0.413	0.252	0.050604
GO cc:go nucleoplasm part	663	0.0635	0.0387	0.050614
GO bp:go regulation of synapse maturation	14	0.456	0.278	0.050805
GO bp:go regulation of extracellular matrix disassembly	14	0.428	0.262	0.050887
GO bp:go amino acid transport	115	0.155	0.0948	0.051062
Curated gene sets:wang cisplatin response and xpc dn	222	0.108	0.0664	0.05135
GO bp:go cerebral cortex radially oriented cell migration	27	0.297	0.182	0.051364
GO mf:go sodium amino acid symporter activity	12	0.522	0.32	0.051412
Curated gene sets:ikeda mir1 targets dn	7	0.659	0.405	0.051743
Curated gene sets:lein midbrain markers	70	0.196	0.12	0.051762
GO bp:go positive regulation of synapse assembly	54	0.251	0.154	0.051844
Curated gene sets:terao aox4 targets skin up	35	0.275	0.169	0.051992
GO bp:go embryonic camera type eye morphogenesis	24	0.416	0.256	0.052133
GO bp:go superoxide anion generation	11	0.47	0.29	0.052189
Curated gene sets:worschech tumor rejection dn	9	0.522	0.322	0.052206
GO bp:go g protein coupled receptor internalization	13	0.498	0.307	0.052322
Curated gene sets:nielsen schwannoma dn	18	0.428	0.264	0.052337
Curated gene sets:bruins uvc response via tp53 group a	857	0.0566	0.0349	0.052638
GO bp:go regulation of protein kinase a signaling	16	0.452	0.279	0.053039
Curated gene sets:reactome activation of the pre replicative complex	28	0.271	0.169	0.053839
Curated gene sets:reactome antiviral mechanism by ifn stimulated genes	65	0.197	0.122	0.053902
Curated gene sets:reactome mapk targets nuclear events mediated by map kinases	28	0.309	0.192	0.054159
Curated gene sets:reactome prefoldin mediated transfer of substrate to cct tric	27	0.298	0.186	0.054306
GO bp:go regulation of protein localization to nucleus	212	0.112	0.0697	0.054349
GO bp:go lens morphogenesis in camera type eye	18	0.431	0.269	0.054516
GO mf:go atpase activator activity	18	0.366	0.229	0.054577
GO mf:go nucleic acid binding transcription factor activity	1137	0.0527	0.0329	0.054597
Curated gene sets:pid vegfr1 2 pathway	69	0.194	0.121	0.05475
GO bp:go reactive nitrogen species metabolic process	19	0.372	0.233	0.054763
Curated gene sets:schaeffer prostate development 6hr dn	505	0.0732	0.0457	0.054778
Curated gene sets:reactome cell cycle checkpoints	112	0.144	0.0903	0.05478
GO bp:go regulation of neurotransmitter receptor activity	29	0.318	0.199	0.054937
GO bp:go response to electrical stimulus	42	0.257	0.161	0.054943
Curated gene sets:reactome abortive elongation of hiv1 transcript in the absence of tat	23	0.387	0.242	0.054994
Curated gene sets:reactome erk mapk targets	19	0.375	0.235	0.055169
GO bp:go establishment of protein localization to organelle	346	0.0866	0.0542	0.055254
GO cc:go neuron spine	116	0.148	0.093	0.05542
GO bp:go arginine metabolic process	16	0.394	0.247	0.055549
Curated gene sets:mili pseudopodia chemotaxis up	67	0.187	0.118	0.05562
Curated gene sets:smith tert targets up	135	0.138	0.0864	0.055622
GO mf:go solute sodium symporter activity	49	0.243	0.153	0.05569
GO bp:go regulation of defense response to virus by host	133	0.136	0.0855	0.055694
GO bp:go cytoplasmic sequestering of transcription factor	17	0.351	0.221	0.055712
Curated gene sets:reactome nuclear signaling by erbb4	38	0.249	0.157	0.055722
GO bp:go chromatin remodeling	140	0.134	0.0843	0.055784
Curated gene sets:tesar alk targets human es 5d up	5	0.857	0.539	0.055996
GO cc:go beta catenin destruction complex	14	0.44	0.277	0.05603
GO bp:go aspartate metabolic process	11	0.542	0.341	0.056034
GO cc:go condensed chromosome	185	0.112	0.0708	0.056052
GO bp:go monovalent inorganic cation transport	420	0.0789	0.0497	0.056201
GO mf:go s acyltransferase activity	27	0.325	0.205	0.056255
GO bp:go protein k48 linked deubiquitination	19	0.425	0.268	0.056509
Curated gene sets:reactome transport of mature mrna derived from an intronless transcript	33	0.257	0.162	0.056552
GO bp:go regulation of dephosphorylation	149	0.131	0.0824	0.056578
GO bp:go basic amino acid transport	11	0.538	0.34	0.056593
GO bp:go cell cycle	1267	0.0457	0.0289	0.056811
Curated gene sets:pid rhoa pathway	45	0.261	0.165	0.056843
GO bp:go dna modification	75	0.182	0.115	0.057032
Curated gene sets:doane breast cancer esr1 dn	46	0.242	0.153	0.057221
GO bp:go maturation of 5 8s rrna from tricistronic rrna transcript ssu rrna 5 8s rrna lsu rrna	19	0.389	0.246	0.057254
GO mf:go dna polymerase binding	12	0.434	0.275	0.057362
GO bp:go positive regulation of neuron differentiation	294	0.0931	0.059	0.0574
Curated gene sets:mcclung creb1 targets dn	54	0.235	0.149	0.057445
GO bp:go glycosphingolipid metabolic process	63	0.205	0.13	0.05749
GO mf:go neurotransmitter sodium symporter activity	17	0.418	0.265	0.057653
GO mf:go microtubule binding	189	0.116	0.0738	0.057685
Curated gene sets:vantveer breast cancer brca1 up	34	0.253	0.161	0.057723
GO cc:go sodium potassium exchanging atpase complex	10	0.542	0.345	0.057809
GO mf:go signal sequence binding	38	0.242	0.154	0.057902
Curated gene sets:camps colon cancer copy number dn	61	0.228	0.145	0.057993
Curated gene sets:scian cell cycle targets of tp53 and tp73 up	9	0.544	0.346	0.058018
Curated gene sets:browne hcmv infection 18hr up	172	0.12	0.076	0.058026
GO bp:go gene silencing by rna	139	0.137	0.0872	0.05817
Curated gene sets:yao temporal response to progesterone cluster 2	79	0.172	0.109	0.058223
GO mf:go protein deacetylase activity	40	0.24	0.153	0.058255
GO bp:go negative regulation of dna templated transcription elongation	13	0.43	0.274	0.0583
Curated gene sets:fujiwara park2 hepatocyte proliferation up	10	0.481	0.307	0.058538
GO bp:go regulation of neural precursor cell proliferation	73	0.194	0.124	0.058571
GO bp:go cellular potassium ion homeostasis	12	0.501	0.319	0.058574
GO mf:go platelet derived growth factor receptor binding	15	0.476	0.304	0.058585
GO mf:go nucleotide kinase activity	21	0.343	0.219	0.058629
GO bp:go embryonic hindlimb morphogenesis	28	0.323	0.206	0.058691
Curated gene sets:reactome mrna capping	28	0.322	0.206	0.058845
GO bp:go rhythmic process	287	0.0951	0.0608	0.059008
Curated gene sets:cheok response to hd mtx up	20	0.354	0.226	0.059156
Curated gene sets:korkola embryonal carcinoma	8	0.557	0.357	0.059172
GO bp:go negative regulation of transferase activity	345	0.0842	0.054	0.059203
GO bp:go regulation of peptide secretion	200	0.117	0.0749	0.059217
GO mf:go mitogen activated protein kinase kinase binding	16	0.385	0.246	0.059276
Curated gene sets:pid rac1 pathway	52	0.224	0.144	0.059347
GO bp:go regulation of axon guidance	38	0.266	0.17	0.059523
GO cc:go invadopodium	10	0.506	0.324	0.05954
GO mf:go solute cation symporter activity	96	0.17	0.109	0.0596
GO bp:go response to vitamin e	15	0.411	0.264	0.059811
GO bp:go xenophagy	103	0.154	0.099	0.059824
GO bp:go hippocampus development	68	0.19	0.122	0.060221
Curated gene sets:reactome norepinephrine neurotransmitter release cycle	9	0.539	0.348	0.060423
GO mf:go protein kinase c binding	50	0.231	0.149	0.060574
GO cc:go h4 histone acetyltransferase complex	16	0.378	0.244	0.06066
GO bp:go embryonic eye morphogenesis	33	0.32	0.206	0.06071
Curated gene sets:reactome deposition of new cenpa containing nucleosomes at the centromere	60	0.221	0.143	0.060737
Curated gene sets:nikolsky breast cancer 7q21 q22 amplicon	76	0.342	0.221	0.060762
GO bp:go protein heterooligomerization	111	0.152	0.0984	0.060974
Curated gene sets:reactome prolactin receptor signaling	14	0.428	0.277	0.060979
Curated gene sets:card mir302a targets	74	0.195	0.126	0.061003
Curated gene sets:reactome acetylcholine neurotransmitter release cycle	10	0.502	0.325	0.061108
GO bp:go adherens junction assembly	32	0.258	0.167	0.061136
GO bp:go pericardium development	18	0.397	0.257	0.061252
Curated gene sets:liu il13 priming model	15	0.393	0.255	0.061527
GO bp:go negative regulation of glycoprotein biosynthetic process	11	0.461	0.299	0.061718
GO bp:go peptidyl amino acid modification	797	0.0558	0.0362	0.061801
GO bp:go positive regulation of alcohol biosynthetic process	23	0.334	0.217	0.06197
GO mf:go peptide hormone binding	35	0.258	0.167	0.061974
Curated gene sets:weber methylated lcp in fibroblast dn	10	0.416	0.271	0.062084
GO bp:go negative regulation of dendrite development	26	0.31	0.202	0.062305
GO cc:go brush border membrane	53	0.203	0.132	0.062307
Curated gene sets:elvidge hif2a targets up	6	0.684	0.446	0.062456
Curated gene sets:ivanova hematopoiesis stem cell short term	30	0.272	0.177	0.062533
Curated gene sets:pid wnt canonical pathway	21	0.367	0.239	0.062596
GO mf:go syntaxin 1 binding	18	0.368	0.24	0.062648
GO bp:go cellular macromolecule localization	1181	0.0463	0.0302	0.062736
GO bp:go adult walking behavior	31	0.272	0.178	0.062941
GO bp:go walking behavior	31	0.272	0.178	0.062941
GO bp:go mechanosensory behavior	12	0.475	0.311	0.062982
GO bp:go protein localization to nucleus	155	0.124	0.0811	0.063082
Curated gene sets:xu gh1 autocrine targets dn	131	0.135	0.088	0.063085
Curated gene sets:maekawa atf2 targets	23	0.305	0.199	0.063161
Curated gene sets:delacroix rar bound es	441	0.0751	0.0491	0.063237
GO bp:go autonomic nervous system development	41	0.263	0.172	0.063362
Curated gene sets:reactome circadian repression of expression by rev erba	22	0.332	0.217	0.063407
Curated gene sets:rodrigues thyroid carcinoma dn	75	0.194	0.127	0.063487
GO bp:go establishment of endothelial intestinal barrier	10	0.528	0.346	0.063566
GO bp:go negative regulation of kinase activity	243	0.0985	0.0646	0.063632
Curated gene sets:reactome signaling by notch	96	0.155	0.102	0.063692
Curated gene sets:reactome inhibition of replication initiation of damaged dna by rb1 e2f1	10	0.508	0.334	0.063931
GO bp:go regulation of sprouting angiogenesis	26	0.298	0.195	0.063962
GO bp:go response to muscle activity	20	0.333	0.219	0.064221
GO bp:go negative regulation of transcription from rna polymerase ii promoter	704	0.0581	0.0382	0.064474
GO bp:go dendrite development	72	0.19	0.125	0.06454
GO bp:go phosphatidylglycerol acyl chain remodeling	17	0.385	0.254	0.064552
GO bp:go cellular response to glucose starvation	31	0.275	0.181	0.064628
Curated gene sets:kegg endometrial cancer	51	0.206	0.136	0.064678
GO mf:go chemorepellent activity	26	0.304	0.2	0.064696
GO bp:go regulation of vacuole organization	37	0.24	0.159	0.064782
GO bp:go membrane repolarization	14	0.442	0.292	0.06502
GO bp:go positive regulation of cell projection organization	289	0.0887	0.0586	0.065194
GO mf:go voltage gated potassium channel activity	85	0.166	0.11	0.065205
GO bp:go response to caffeine	18	0.353	0.233	0.065214
GO bp:go response to protozoan	20	0.39	0.258	0.065247
GO bp:go positive regulation of sodium ion transport	32	0.274	0.181	0.065366
Curated gene sets:amit egf response 40 hela	41	0.237	0.157	0.065976
Curated gene sets:abramson interact with aire	44	0.225	0.15	0.066
GO bp:go synaptic transmission dopaminergic	17	0.383	0.254	0.0661
Curated gene sets:gavin foxp3 targets cluster p3	151	0.13	0.0864	0.066126
GO bp:go ganglioside biosynthetic process	18	0.397	0.264	0.066166
Curated gene sets:plasari tgfb1 targets 10hr dn	233	0.104	0.0689	0.066181
GO cc:go axon	404	0.0791	0.0526	0.066212
GO bp:go regulation of cell morphogenesis involved in differentiation	320	0.0865	0.0575	0.066226
GO bp:go regulation of microtubule based process	231	0.096	0.0639	0.06657
GO bp:go response to drug	420	0.0743	0.0495	0.066595
GO bp:go myotube cell development	27	0.269	0.179	0.066625
Curated gene sets:kegg wnt signaling pathway	146	0.13	0.0864	0.066691
GO mf:go rac guanyl nucleotide exchange factor activity	13	0.424	0.282	0.06679
GO bp:go cellular response to steroid hormone stimulus	210	0.108	0.0721	0.066823
Curated gene sets:reactome tetrahydrobiopterin bh4 synthesis recycling salvage and regulation	12	0.441	0.294	0.066865
Curated gene sets:moreaux b lymphocyte maturation by taci up	85	0.16	0.107	0.066893
Curated gene sets:mikkelsen ips lcp with h3k4me3 and h3k27me3	5	0.635	0.424	0.066949
GO bp:go adult behavior	131	0.135	0.09	0.067053
GO mf:go myosin heavy chain binding	12	0.412	0.275	0.067159
Curated gene sets:inamura lung cancer scc subtypes up	15	0.382	0.255	0.067173
Curated gene sets:gazda diamond blackfan anemia myeloid dn	35	0.274	0.183	0.067261
GO bp:go response to oxygen radical	17	0.359	0.24	0.067499
GO bp:go adherens junction organization	69	0.182	0.122	0.067605
Curated gene sets:biocarta arap pathway	17	0.31	0.207	0.067827
Curated gene sets:benporath cycling genes	627	0.0597	0.04	0.067928
GO bp:go central nervous system development	828	0.0546	0.0367	0.068274
Curated gene sets:ding lung cancer mutated significantly	24	0.337	0.227	0.068392
GO bp:go cell motility	809	0.0549	0.037	0.068675
GO bp:go localization of cell	809	0.0549	0.037	0.068675
Curated gene sets:reactome mrna processing	149	0.122	0.0821	0.068686
Curated gene sets:kegg colorectal cancer	62	0.184	0.124	0.068748
Curated gene sets:biocarta cellcycle pathway	24	0.327	0.22	0.068748
Curated gene sets:kyng werner syndrom dn	29	0.287	0.193	0.068752
GO bp:go cellular response to dna damage stimulus	688	0.0572	0.0385	0.068869
GO cc:go voltage gated calcium channel complex	39	0.248	0.167	0.068869
Curated gene sets:reactome recruitment of mitotic centrosome proteins and complexes	61	0.179	0.121	0.068894
GO bp:go cell cell adhesion via plasma membrane adhesion molecules	194	0.131	0.0884	0.06895
Curated gene sets:reactome acyl chain remodelling of pc	21	0.336	0.227	0.069375
GO bp:go myeloid cell homeostasis	84	0.165	0.111	0.069405
GO mf:go protein channel activity	10	0.464	0.314	0.069413
Curated gene sets:reactome amino acid transport across the plasma membrane	27	0.289	0.195	0.069422
GO bp:go regulation of interleukin 2 biosynthetic process	17	0.378	0.256	0.069597
Curated gene sets:ramalho stemness dn	70	0.184	0.124	0.069632
GO cc:go small nucleolar ribonucleoprotein complex	18	0.38	0.257	0.069667
GO cc:go apical junction complex	119	0.139	0.0937	0.069715
GO mf:go sulfuric ester hydrolase activity	11	0.434	0.294	0.069995
Curated gene sets:reactome p38mapk events	13	0.363	0.246	0.070089
Curated gene sets:holleman prednisolone resistance b all dn	11	0.485	0.329	0.070286
GO mf:go anion cation symporter activity	51	0.214	0.146	0.07057
GO cc:go chromosome centromeric region	164	0.109	0.0742	0.070581
Curated gene sets:asgharzadeh neuroblastoma poor survival dn	42	0.245	0.166	0.070718
GO bp:go regulation of mesenchymal cell proliferation	34	0.285	0.194	0.070744
Curated gene sets:sa g1 and s phases	15	0.385	0.262	0.070876
GO bp:go vesicle docking involved in exocytosis	35	0.238	0.162	0.070879
Curated gene sets:chandran metastasis top50 up	34	0.267	0.182	0.070941
GO mf:go ammonium ion binding	67	0.191	0.13	0.070989
Curated gene sets:sakai chronic hepatitis vs liver cancer dn	34	0.25	0.17	0.071011
GO bp:go vesicle docking	56	0.19	0.129	0.071124
Curated gene sets:ivanov mutated in colon cancer	13	0.385	0.262	0.07123
Curated gene sets:reactome erks are inactivated	12	0.417	0.284	0.071333
GO bp:go regulation of transcription involved in g1 s transition of mitotic cell cycle	25	0.297	0.203	0.071514
GO mf:go calmodulin binding	171	0.115	0.0783	0.071527
GO bp:go protein localization	1730	0.0371	0.0254	0.071705
Curated gene sets:browne hcmv infection 16hr up	212	0.0998	0.0682	0.07172
GO cc:go plasma membrane region	892	0.0521	0.0356	0.071778
GO bp:go regulation of cell adhesion	604	0.0619	0.0424	0.071837
Curated gene sets:boyault liver cancer subclass g12 dn	15	0.414	0.283	0.071853
Curated gene sets:bilanges serum sensitive genes	85	0.162	0.111	0.071922
Curated gene sets:reactome signalling to ras	27	0.274	0.188	0.072226
Curated gene sets:hernandez mitotic arrest by docetaxel 2 up	61	0.192	0.132	0.072282
Curated gene sets:reactome glycogen breakdown glycogenolysis	13	0.417	0.286	0.072382
GO cc:go cul3 ring ubiquitin ligase complex	59	0.194	0.133	0.072431
Curated gene sets:reactome tie2 signaling	18	0.329	0.225	0.072529
GO bp:go positive regulation of neuron apoptotic process	45	0.219	0.15	0.072752
Curated gene sets:ma pituitary fetal vs adult dn	19	0.335	0.23	0.072755
GO mf:go kinase regulator activity	181	0.109	0.0751	0.072757
GO mf:go chromatin binding	410	0.0728	0.05	0.072767
GO cc:go histone deacetylase complex	56	0.197	0.135	0.072789
Curated gene sets:biocarta rho pathway	29	0.268	0.184	0.072905
GO bp:go regulation of viral transcription	60	0.203	0.14	0.073038
GO bp:go regulation of membrane protein ectodomain proteolysis	20	0.283	0.195	0.073139
GO bp:go rna capping	37	0.262	0.181	0.073364
GO bp:go 7 methylguanosine rna capping	37	0.262	0.181	0.073364
GO bp:go regulation of defense response to virus	186	0.106	0.0727	0.073399
GO cc:go carboxy terminal domain protein kinase complex	22	0.332	0.229	0.073402
Curated gene sets:pid lis1 pathway	27	0.273	0.188	0.073452
Curated gene sets:reactome cell cycle	390	0.0731	0.0504	0.073632
Curated gene sets:hoffman clock targets up	11	0.505	0.348	0.073736
GO cc:go cell cortex region	16	0.363	0.251	0.07378
Curated gene sets:nielsen malignat fibrous histiocytoma dn	17	0.361	0.249	0.073794
Curated gene sets:finetti breast cancer kinome green	14	0.377	0.26	0.073889
GO bp:go secretion by cell	464	0.0693	0.0479	0.073955
Curated gene sets:baris thyroid cancer up	22	0.31	0.214	0.074141
Curated gene sets:seike lung cancer poor survival	10	0.47	0.325	0.074272
GO bp:go autophagy	382	0.0745	0.0516	0.074343
Curated gene sets:lopez mesothelioma survival overall up	7	0.478	0.332	0.074816
GO mf:go mhc protein complex binding	19	0.323	0.224	0.074825
Curated gene sets:dairkee tert targets up	351	0.0762	0.0529	0.074948
Curated gene sets:ginestier breast cancer 20q13 amplification up	111	0.138	0.096	0.075218
Curated gene sets:reactome formation of transcription coupled ner tc ner repair complex	28	0.307	0.214	0.075259
GO bp:go regulation of membrane potential	336	0.0808	0.0562	0.075478
GO bp:go regulation of myoblast fusion	19	0.383	0.266	0.075557
Curated gene sets:reactome neuronal system	264	0.0935	0.0652	0.075691
Curated gene sets:chiba response to tsa up	51	0.196	0.137	0.076012
Curated gene sets:sa reg cascade of cyclin expr	13	0.428	0.299	0.076172
GO mf:go ubiquitin like protein ligase binding	252	0.0925	0.0646	0.076188
GO mf:go antioxidant activity	68	0.175	0.122	0.076218
Curated gene sets:chang pou5f1 targets dn	8	0.544	0.38	0.07643
Curated gene sets:rampon enriched learning environment early dn	10	0.381	0.267	0.076546
Curated gene sets:gyorffy doxorubicin resistance	48	0.222	0.155	0.076813
Curated gene sets:pid pi3k plc trk pathway	36	0.235	0.165	0.076911
GO mf:go nucleotide transmembrane transporter activity	17	0.346	0.243	0.077105
GO bp:go multi organism transport	69	0.168	0.118	0.077143
GO bp:go multi organism localization	69	0.168	0.118	0.077143
GO bp:go forebrain generation of neurons	61	0.202	0.142	0.077193
GO bp:go dna templated transcription elongation	94	0.156	0.109	0.077233
GO bp:go microtubule anchoring	17	0.313	0.22	0.077325
GO bp:go negative regulation of stress fiber assembly	14	0.408	0.287	0.077428
GO cc:go neuronal cell body membrane	20	0.363	0.255	0.077506
GO mf:go inorganic cation transmembrane transporter activity	504	0.0668	0.047	0.077537
GO mf:go pre mrna binding	22	0.329	0.231	0.077574
GO bp:go regulation of lymphocyte apoptotic process	52	0.188	0.132	0.077672
GO bp:go response to growth hormone	30	0.286	0.202	0.077914
Curated gene sets:gentile uv response cluster d8	40	0.236	0.167	0.078034
GO bp:go regulation of interleukin 10 production	42	0.228	0.161	0.078341
GO bp:go negative regulation of gene expression	1426	0.0393	0.0278	0.078533
GO bp:go positive regulation of histone deacetylation	14	0.387	0.274	0.078598
Curated gene sets:biocarta arenrf2 pathway	13	0.403	0.285	0.078739
GO mf:go receptor activator activity	32	0.269	0.19	0.078774
GO bp:go negative regulation of gliogenesis	36	0.265	0.188	0.078863
Curated gene sets:browne hcmv infection 24hr up	142	0.122	0.0864	0.078868
GO bp:go negative regulation of tumor necrosis factor mediated signaling pathway	14	0.361	0.255	0.078956
Curated gene sets:reactome shc1 events in erbb4 signaling	20	0.323	0.229	0.079021
GO bp:go regulation of endocytosis	195	0.101	0.0719	0.079115
Curated gene sets:kegg alpha linolenic acid metabolism	19	0.353	0.251	0.079252
Curated gene sets:biocarta feeder pathway	9	0.427	0.303	0.079354
GO bp:go nls bearing protein import into nucleus	22	0.285	0.202	0.079382
GO cc:go inhibitory synapse	11	0.504	0.358	0.079437
Curated gene sets:zheng il22 signaling dn	35	0.246	0.175	0.079573
GO bp:go protein modification by small protein conjugation or removal	816	0.0503	0.0357	0.079751
GO bp:go positive regulation of nuclear transcribed mrna poly a tail shortening	11	0.404	0.288	0.079805
GO bp:go regulation of nuclear transcribed mrna poly a tail shortening	11	0.404	0.288	0.079805
Curated gene sets:enk uv response keratinocyte dn	466	0.0667	0.0474	0.079846
Curated gene sets:biocarta raccycd pathway	25	0.279	0.199	0.079886
Curated gene sets:kegg pentose phosphate pathway	23	0.277	0.197	0.079974
Curated gene sets:farmer breast cancer cluster 8	7	0.562	0.4	0.080109
Curated gene sets:pramoonjago sox4 targets up	50	0.204	0.145	0.080145
GO mf:go ligase regulator activity	14	0.389	0.277	0.080172
GO bp:go plasma membrane fusion	26	0.259	0.184	0.08023
GO bp:go establishment of protein localization	1366	0.0396	0.0282	0.080302
Curated gene sets:dasu il6 signaling up	58	0.185	0.132	0.080379
Curated gene sets:zwang egf persistently dn	58	0.171	0.122	0.080471
Curated gene sets:pid cdc42 pathway	69	0.174	0.124	0.080515
Curated gene sets:reactome rna pol ii transcription pre initiation and promoter opening	37	0.266	0.19	0.080608
GO bp:go polysaccharide biosynthetic process	41	0.243	0.173	0.080611
GO bp:go response to cocaine	46	0.211	0.151	0.080702
Curated gene sets:haslinger b cll with 11q23 deletion	22	0.327	0.233	0.080711
GO bp:go sialylation	21	0.342	0.244	0.080755
GO mf:go sialyltransferase activity	21	0.342	0.244	0.080755
Curated gene sets:haddad t lymphocyte and nk progenitor up	72	0.167	0.119	0.080776
GO bp:go nucleotide phosphorylation	56	0.173	0.124	0.080788
Curated gene sets:mikkelsen npc hcp with h3k27me3	340	0.0818	0.0585	0.08111
GO bp:go hepaticobiliary system development	125	0.126	0.0902	0.081263
GO mf:go dopamine binding	10	0.454	0.325	0.08129
Curated gene sets:kobayashi response to romidepsin	19	0.371	0.266	0.081321
GO bp:go regulation of astrocyte differentiation	26	0.281	0.201	0.081389
GO bp:go rna localization	171	0.104	0.0744	0.081538
GO bp:go positive regulation of receptor internalization	24	0.306	0.219	0.081543
Curated gene sets:flechner pbl kidney transplant ok vs donor up	141	0.114	0.0821	0.081616
GO mf:go structural constituent of nuclear pore	13	0.339	0.243	0.081644
Curated gene sets:torchia targets of ewsr1 fli1 fusion dn	306	0.0832	0.0597	0.081671
GO bp:go regulation of interleukin 2 production	46	0.221	0.159	0.082098
Curated gene sets:mili pseudopodia haptotaxis dn	648	0.0554	0.0398	0.082119
GO bp:go response to epinephrine	16	0.389	0.28	0.082259
Curated gene sets:reactome nuclear events kinase and transcription factor activation	22	0.296	0.213	0.082325
GO bp:go nuclear pore organization	15	0.336	0.242	0.082375
Curated gene sets:ross aml of fab m7 type	66	0.166	0.119	0.082395
GO mf:go map kinase kinase activity	11	0.429	0.309	0.082545
GO bp:go regulation of fibroblast proliferation	80	0.16	0.115	0.082593
Curated gene sets:schaeffer prostate development and cancer box3	5	0.77	0.555	0.082642
Curated gene sets:yao temporal response to progesterone cluster 10	67	0.169	0.122	0.0831
GO mf:go channel regulator activity	128	0.126	0.0913	0.083203
Curated gene sets:reactome developmental biology	373	0.0752	0.0544	0.083268
GO bp:go ribonucleoprotein complex localization	110	0.127	0.0915	0.083365
GO bp:go epithelial cell differentiation involved in kidney development	23	0.295	0.214	0.083367
GO cc:go mhc class i protein complex	10	0.476	0.345	0.083539
Curated gene sets:wang esophagus cancer vs normal dn	98	0.131	0.0946	0.083624
Curated gene sets:reactome acyl chain remodelling of pg	16	0.371	0.269	0.083818
GO mf:go ligand dependent nuclear receptor transcription coactivator activity	49	0.202	0.147	0.083886
GO bp:go negative regulation of gene expression epigenetic	100	0.144	0.105	0.083943
Curated gene sets:mikkelsen ips with hcp h3k27me3	98	0.144	0.104	0.08403
GO bp:go negative chemotaxis	38	0.233	0.169	0.084031
GO mf:go dopamine receptor binding	17	0.301	0.219	0.08407
Curated gene sets:mikkelsen es lcp with h3k4me3	135	0.118	0.0855	0.084108
Curated gene sets:bild e2f3 oncogenic signature	233	0.0919	0.0667	0.084269
GO bp:go regulation of long term neuronal synaptic plasticity	23	0.286	0.208	0.08433
Curated gene sets:kyng dna damage by gamma and uv radiation	88	0.142	0.103	0.084394
GO bp:go metencephalon development	96	0.143	0.104	0.084473
Curated gene sets:reactome metabolism of non coding rna	48	0.177	0.129	0.084483
Curated gene sets:biocarta carm er pathway	31	0.261	0.19	0.084512
GO cc:go histone methyltransferase complex	65	0.163	0.118	0.08452
GO bp:go negative regulation of transcription factor import into nucleus	37	0.228	0.166	0.084564
Curated gene sets:reactome downregulation of smad2 3 smad4 transcriptional activity	18	0.315	0.229	0.084597
Curated gene sets:lin apc targets	72	0.156	0.113	0.084798
GO mf:go core promoter binding	145	0.123	0.0895	0.084861
Curated gene sets:lee bmp2 targets dn	846	0.0479	0.0349	0.084865
Curated gene sets:pid p75 ntr pathway	62	0.178	0.129	0.084871
GO bp:go kidney vasculature development	18	0.356	0.259	0.085102
GO bp:go renal system vasculature development	18	0.356	0.259	0.085102
GO bp:go positive regulation of transcription from rna polymerase ii promoter involved in cellular response to chemical stimulus	27	0.296	0.216	0.085148
Curated gene sets:mikkelsen es hcp with h3k27me3	40	0.254	0.185	0.085462
GO mf:go 3 5 cyclic amp phosphodiesterase activity	15	0.376	0.275	0.085472
GO bp:go regulation of alpha amino 3 hydroxy 5 methyl 4 isoxazole propionate selective glutamate receptor activity	18	0.352	0.257	0.085514
GO bp:go wound healing spreading of epidermal cells	10	0.428	0.313	0.085732
Curated gene sets:reactome phosphorylation of the apc c	17	0.331	0.242	0.085773
GO bp:go negative regulation of behavior	17	0.376	0.275	0.085917
GO bp:go negative regulation of lymphocyte apoptotic process	26	0.256	0.188	0.085927
GO mf:go hydrolase activity acting on carbon nitrogen but not peptide bonds in linear amidines	10	0.473	0.346	0.085936
GO bp:go cellular response to lipoprotein particle stimulus	13	0.348	0.255	0.085978
Curated gene sets:petretto cardiac hypertrophy	32	0.265	0.194	0.085987
GO cc:go exocytic vesicle	137	0.119	0.0868	0.08599
Curated gene sets:caffarel response to thc 8hr 3 dn	9	0.578	0.423	0.086002
GO bp:go regulation of cell differentiation	1440	0.0383	0.028	0.086059
GO cc:go protein kinase complex	84	0.172	0.126	0.086128
GO bp:go regulation of intracellular protein transport	368	0.0725	0.0532	0.086327
Curated gene sets:reactome glucose metabolism	59	0.178	0.131	0.086404
GO bp:go ras protein signal transduction	139	0.115	0.0845	0.086491
Curated gene sets:rattenbacher bound by celf1	401	0.068	0.0499	0.086501
GO bp:go cell cycle phase transition	246	0.0852	0.0625	0.086526
Curated gene sets:mody hippocampus prenatal	42	0.22	0.161	0.086657
Curated gene sets:tonks targets of runx1 runx1t1 fusion monocyte up	203	0.0947	0.0696	0.086688
Curated gene sets:reactome ion channel transport	48	0.218	0.16	0.086839
GO bp:go regulation of microtubule based movement	17	0.293	0.216	0.08687
GO bp:go positive regulation of lamellipodium organization	23	0.3	0.22	0.086885
Curated gene sets:reactome mitotic g2 g2 m phases	76	0.147	0.108	0.086915
GO cc:go autophagosome	76	0.153	0.113	0.086979
Curated gene sets:st p38 mapk pathway	36	0.241	0.178	0.087008
Curated gene sets:pid kit pathway	51	0.193	0.142	0.087507
Curated gene sets:sesto response to uv c6	38	0.226	0.167	0.087573
GO bp:go inorganic ion import into cell	15	0.392	0.29	0.087899
GO bp:go inorganic cation import into cell	15	0.392	0.29	0.087899
GO bp:go positive regulation of t cell proliferation	90	0.15	0.111	0.088104
GO bp:go modulation of growth of symbiont involved in interaction with host	16	0.313	0.232	0.088123
GO mf:go sodium ion binding	14	0.383	0.284	0.088481
Curated gene sets:ivanova hematopoiesis stem cell long term	290	0.0798	0.0592	0.088674
Curated gene sets:kurokawa liver cancer chemotherapy up	12	0.346	0.256	0.088712
GO bp:go regulation of response to external stimulus	904	0.0473	0.0351	0.088784
Curated gene sets:bonome ovarian cancer survival suboptimal debulking	482	0.0626	0.0464	0.088881
GO mf:go actin monomer binding	21	0.291	0.216	0.08934
GO mf:go 14 3 3 protein binding	19	0.337	0.25	0.089379
GO mf:go hexosaminidase activity	15	0.339	0.252	0.089568
Curated gene sets:iwanaga e2f1 targets induced by serum	31	0.247	0.184	0.08958
GO bp:go nuclear export	139	0.107	0.0795	0.089618
GO mf:go o methyltransferase activity	17	0.335	0.25	0.089767
GO mf:go s adenosylmethionine dependent methyltransferase activity	134	0.114	0.0851	0.089773
GO bp:go membrane fusion	152	0.103	0.0769	0.090124
GO bp:go regulation of leukocyte apoptotic process	77	0.149	0.112	0.090135
GO mf:go heat shock protein binding	85	0.147	0.109	0.090144
GO bp:go regulation of peptidyl serine phosphorylation of stat protein	21	0.474	0.354	0.090186
GO bp:go positive regulation of peptidyl serine phosphorylation of stat protein	21	0.474	0.354	0.090186
Curated gene sets:kang doxorubicin resistance dn	18	0.335	0.25	0.090386
GO cc:go platelet alpha granule membrane	13	0.417	0.312	0.090438
GO mf:go snare binding	121	0.122	0.0916	0.090474
Curated gene sets:gyorffy mitoxantrone resistance	51	0.204	0.152	0.090485
Curated gene sets:biocarta ps1 pathway	14	0.333	0.249	0.090581
GO bp:go cytokine metabolic process	17	0.35	0.262	0.090703
GO bp:go positive regulation of vacuole organization	12	0.331	0.248	0.090707
Curated gene sets:figueroa aml methylation cluster 4 dn	14	0.359	0.269	0.090761
GO bp:go nucleus organization	136	0.108	0.0807	0.090781
Curated gene sets:park hsc and multipotent progenitors	47	0.19	0.142	0.090803
GO bp:go negative regulation of neurological system process	15	0.384	0.287	0.090837
GO cc:go sex chromosome	26	0.224	0.168	0.091229
Curated gene sets:hesson tumor suppressor cluster 3p21 3	7	0.724	0.543	0.091238
Curated gene sets:uzonyi response to leukotriene and thrombin	37	0.25	0.188	0.091318
GO bp:go dna repair	458	0.0625	0.0469	0.091332
Curated gene sets:kauffmann melanoma relapse dn	6	0.496	0.372	0.091341
GO bp:go protein localization to mitochondrion	68	0.166	0.125	0.091405
GO bp:go membrane tubulation	12	0.342	0.257	0.091474
GO bp:go post translational protein modification	28	0.233	0.175	0.091542
GO bp:go cellular response to lithium ion	17	0.317	0.238	0.091547
GO bp:go mitochondrion organization	578	0.0556	0.0418	0.091562
GO bp:go mitochondrial electron transport cytochrome c to oxygen	15	0.332	0.249	0.091616
GO mf:go purine ntp dependent helicase activity	94	0.134	0.101	0.091748
GO bp:go neutral amino acid transport	32	0.246	0.185	0.092085
Curated gene sets:mori immature b lymphocyte up	50	0.187	0.141	0.092233
Curated gene sets:rodrigues ntn1 targets up	14	0.41	0.309	0.092473
Curated gene sets:durchdewald skin carcinogenesis dn	256	0.0857	0.0647	0.092639
GO bp:go cellular response to amino acid starvation	24	0.274	0.207	0.0927
Curated gene sets:zhong secretome of lung cancer and fibroblast	130	0.111	0.0835	0.092787
GO mf:go mismatched dna binding	12	0.321	0.243	0.092932
GO bp:go regulation of cellular response to heat	76	0.144	0.109	0.093002
GO bp:go nucleotide salvage	13	0.353	0.267	0.093195
GO cc:go cell projection part	905	0.0458	0.0347	0.093202
GO bp:go nitric oxide metabolic process	15	0.338	0.256	0.093325
GO bp:go cell differentiation involved in kidney development	34	0.241	0.182	0.093401
GO bp:go cell cycle process	1050	0.0414	0.0314	0.093451
GO bp:go pyruvate metabolic process	60	0.166	0.126	0.093502
Curated gene sets:kamminga senescence	38	0.205	0.155	0.09358
GO bp:go regulation of cellular component biogenesis	734	0.0506	0.0383	0.093601
GO bp:go positive regulation of cell cycle g1 s phase transition	27	0.27	0.205	0.093617
GO cc:go proton transporting atp synthase complex coupling factor f o	11	0.413	0.313	0.09367
Curated gene sets:mikkelsen mef icp with h3k4me3 and h3k27me3	38	0.207	0.157	0.093754
GO mf:go sulfotransferase activity	49	0.197	0.15	0.093814
Curated gene sets:schmahl pdgf signaling	9	0.455	0.346	0.093966
GO mf:go dynein binding	25	0.255	0.194	0.093995
GO bp:go negative regulation of platelet activation	17	0.331	0.251	0.094045
Curated gene sets:tien intestine probiotics 6hr up	53	0.19	0.144	0.094224
GO mf:go symporter activity	137	0.118	0.09	0.094325
GO bp:go dorsal ventral axis specification	20	0.324	0.247	0.094781
GO bp:go positive regulation of potassium ion transmembrane transport	26	0.257	0.196	0.094827
Curated gene sets:hofmann myelodysplastic syndrom risk up	21	0.26	0.199	0.094845
Curated gene sets:verhaak glioblastoma proneural	158	0.107	0.0815	0.094884
Curated gene sets:chen hoxa5 targets 6hr up	9	0.497	0.379	0.094942
GO mf:go nucleobase containing compound kinase activity	43	0.189	0.144	0.094979
GO bp:go phosphorylation	1177	0.0391	0.0298	0.095111
Curated gene sets:gaussmann mll af4 fusion targets d dn	9	0.475	0.363	0.095164
GO bp:go beta catenin destruction complex disassembly	21	0.311	0.238	0.09517
GO bp:go positive regulation of synaptic transmission glutamatergic	17	0.343	0.262	0.095337
GO mf:go growth factor receptor binding	130	0.123	0.0937	0.095499
GO bp:go response to fibroblast growth factor	113	0.125	0.0954	0.095504
Curated gene sets:korkola embryonal carcinoma up	31	0.255	0.195	0.095555
GO bp:go regulation of thymocyte apoptotic process	12	0.39	0.299	0.095671
Curated gene sets:bhat esr1 targets not via akt1 dn	87	0.15	0.115	0.095755
Curated gene sets:sesto response to uv c5	46	0.202	0.155	0.095764
GO bp:go trna threonylcarbamoyladenosine metabolic process	10	0.4	0.307	0.095801
GO bp:go regulation of proton transport	14	0.292	0.223	0.095816
Curated gene sets:rashi response to ionizing radiation 6	78	0.15	0.115	0.095895
GO bp:go positive regulation of mrna 3 end processing	17	0.333	0.255	0.095898
Curated gene sets:peng glutamine deprivation dn	320	0.0723	0.0554	0.096093
Curated gene sets:petretto blood pressure up	12	0.365	0.28	0.096222
GO cc:go holo tfiih complex	12	0.376	0.289	0.096234
Curated gene sets:lindgren bladder cancer cluster 3 dn	216	0.0876	0.0673	0.096329
Curated gene sets:noushmehr gbm germline mutated	7	0.478	0.367	0.096346
Curated gene sets:myllykangas amplification hot spot 2	5	0.558	0.429	0.096668
Curated gene sets:issaeva mll2 targets	55	0.19	0.146	0.096721
Curated gene sets:raffel vegfa targets dn	5	0.733	0.564	0.096905
GO bp:go bone cell development	21	0.294	0.226	0.097101
GO bp:go negative regulation of intracellular protein transport	90	0.14	0.108	0.097143
Curated gene sets:le neuronal differentiation dn	18	0.303	0.234	0.097333
Curated gene sets:krige response to tosedostat 6hr up	863	0.0452	0.0349	0.097629
GO bp:go synaptic vesicle endocytosis	16	0.323	0.249	0.097765
GO mf:go potassium transporting atpase activity	11	0.416	0.321	0.097777
GO bp:go regulation of multi organism process	463	0.0626	0.0484	0.097894
GO mf:go hormone receptor binding	162	0.107	0.0825	0.098159
GO bp:go negative regulation of protein activation cascade	10	0.448	0.347	0.098294
Curated gene sets:zheng foxp3 targets in t lymphocyte up	12	0.348	0.269	0.098347
GO cc:go nuclear matrix	88	0.141	0.109	0.098422
GO bp:go positive regulation of chromatin modification	82	0.148	0.115	0.098425
GO bp:go negative regulation of oligodendrocyte differentiation	13	0.406	0.315	0.098469
GO bp:go phosphatidylethanolamine acyl chain remodeling	22	0.284	0.22	0.098816
GO bp:go single organism cellular localization	862	0.0449	0.0348	0.09892
Curated gene sets:reactome glutamate neurotransmitter release cycle	15	0.35	0.272	0.098953
GO mf:go nucleocytoplasmic transporter activity	22	0.283	0.22	0.098962
GO bp:go negative regulation of protein polymerization	54	0.173	0.135	0.099116
Curated gene sets:nuytten nipp1 targets dn	807	0.0474	0.0369	0.099389
GO bp:go positive regulation of viral transcription	39	0.243	0.189	0.099458
Curated gene sets:gargalovic response to oxidized phospholipids turquoise up	75	0.158	0.123	0.099477
Curated gene sets:mcclung cocaine reward 5d	77	0.151	0.117	0.09957
GO bp:go carbohydrate biosynthetic process	115	0.13	0.101	0.09957
Curated gene sets:st integrin signaling pathway	79	0.148	0.115	0.099586
GO cc:go cell substrate junction	386	0.0664	0.0518	0.099857
Curated gene sets:vantveer breast cancer brca1 dn	42	0.189	0.147	0.10004
GO bp:go cell part morphogenesis	608	0.0541	0.0422	0.10008
GO bp:go microtubule depolymerization	13	0.367	0.286	0.10014
Curated gene sets:xu hgf targets induced by akt1 48hr up	14	0.356	0.278	0.10032
Curated gene sets:hedenfalk breast cancer bracx dn	19	0.292	0.229	0.10038
GO bp:go sympathetic nervous system development	21	0.308	0.241	0.10038
Curated gene sets:zhan multiple myeloma hp up	43	0.188	0.147	0.10039
Curated gene sets:torchia targets of ewsr1 fli1 fusion up	253	0.0821	0.0642	0.10047
GO bp:go osteoblast development	18	0.287	0.224	0.10049
GO bp:go negative regulation of nucleocytoplasmic transport	68	0.159	0.125	0.10062
Curated gene sets:gargalovic response to oxidized phospholipids blue up	129	0.112	0.0878	0.10079
GO bp:go forebrain cell migration	58	0.161	0.126	0.10084
GO bp:go neurological system process involved in regulation of systemic arterial blood pressure	11	0.478	0.374	0.1009
GO mf:go transmitter gated channel activity	23	0.292	0.229	0.10092
Curated gene sets:osman bladder cancer up	383	0.0647	0.0507	0.10094
GO bp:go rna modification	113	0.123	0.0965	0.10102
Curated gene sets:aston major depressive disorder up	45	0.19	0.149	0.10112
GO bp:go regulation of timing of cell differentiation	12	0.395	0.31	0.10113
GO bp:go regulation of development heterochronic	12	0.395	0.31	0.10113
Curated gene sets:markey rb1 chronic lof up	110	0.119	0.0931	0.10132
Curated gene sets:kegg systemic lupus erythematosus	124	0.147	0.115	0.10145
GO cc:go sperm flagellum	53	0.191	0.15	0.10147
GO bp:go astrocyte development	18	0.31	0.243	0.10151
Curated gene sets:reactome mitotic m m g1 phases	163	0.0946	0.0744	0.10159
Curated gene sets:browne hcmv infection 4hr dn	245	0.083	0.0652	0.10165
Curated gene sets:zhan multiple myeloma lb dn	37	0.225	0.177	0.10195
GO mf:go phosphoprotein binding	55	0.176	0.138	0.102
GO bp:go regulation of protein targeting	296	0.0765	0.0602	0.10201
GO cc:go fanconi anaemia nuclear complex	12	0.399	0.314	0.10206
GO mf:go chromatin dna binding	75	0.138	0.109	0.10221
GO bp:go positive regulation of protein deacetylation	18	0.324	0.256	0.10257
Curated gene sets:reactome interferon signaling	152	0.113	0.0894	0.10259
GO bp:go positive regulation of dna templated transcription elongation	23	0.245	0.194	0.10259
GO bp:go macromolecule deacylation	59	0.16	0.126	0.10287
GO bp:go regulation of chromatin silencing	17	0.286	0.226	0.10303
Curated gene sets:biocarta ndkdynamin pathway	18	0.309	0.245	0.10305
GO bp:go regulation of calcineurin nfat signaling cascade	16	0.317	0.251	0.10315
Curated gene sets:boyault liver cancer subclass g3 up	182	0.0916	0.0725	0.10324
GO bp:go regulation of cilium movement	12	0.325	0.257	0.10326
GO bp:go cellular response to oxidative stress	181	0.0956	0.0757	0.10326
GO mf:go intramolecular transferase activity	25	0.245	0.194	0.10329
GO bp:go cardiac conduction	79	0.153	0.121	0.10355
GO bp:go positive regulation of neuron projection development	221	0.085	0.0674	0.10362
Curated gene sets:zwang down by 2nd egf pulse	233	0.0826	0.0655	0.10364
GO bp:go negative regulation of endothelial cell apoptotic process	27	0.258	0.204	0.1037
Curated gene sets:nadler hyperglycemia at obesity	56	0.172	0.136	0.10387
GO bp:go nucleoside triphosphate metabolic process	217	0.0856	0.0679	0.10392
GO bp:go regulation of adherens junction organization	48	0.183	0.146	0.1041
Curated gene sets:haslinger b cll with chromosome 12 trisomy	22	0.272	0.217	0.10434
Curated gene sets:tomlins prostate cancer dn	39	0.213	0.169	0.10444
Curated gene sets:bruins uvc response middle	95	0.124	0.0985	0.10453
Curated gene sets:amundson response to arsenite	203	0.0898	0.0715	0.10458
Curated gene sets:pid atf2 pathway	59	0.17	0.135	0.10465
Curated gene sets:kaab failed heart atrium dn	133	0.106	0.0848	0.10477
Curated gene sets:reactome signalling to p38 via rit and rin	15	0.319	0.255	0.10483
Curated gene sets:reactome myogenesis	28	0.264	0.211	0.10504
GO mf:go passive transmembrane transporter activity	436	0.0639	0.051	0.10506
GO bp:go neuromuscular synaptic transmission	26	0.263	0.21	0.10543
GO bp:go response to amine	47	0.179	0.143	0.10556
GO bp:go protein localization to chromatin	13	0.304	0.243	0.10567
GO bp:go cellular response to cholesterol	12	0.367	0.294	0.10567
GO bp:go locomotory behavior	177	0.0984	0.0787	0.10571
GO bp:go action potential	92	0.137	0.11	0.1059
Curated gene sets:welcsh brca1 targets dn	134	0.103	0.0829	0.10614
Curated gene sets:nuytten ezh2 targets dn	971	0.0408	0.0327	0.10616
GO bp:go cerebellar cortex development	44	0.186	0.149	0.10627
GO bp:go regulation of response to biotic stimulus	233	0.0824	0.0661	0.10629
Curated gene sets:enk uv response epidermis up	279	0.0737	0.0591	0.10635
Curated gene sets:barrier cancer relapse tumor sample up	15	0.348	0.279	0.10647
GO mf:go phosphoprotein phosphatase activity	170	0.0946	0.076	0.10654
GO bp:go positive regulation of transcription from rna polymerase ii promoter in response to stress	22	0.262	0.211	0.10665
Curated gene sets:reactome signaling by scf kit	74	0.143	0.115	0.10669
Curated gene sets:browne hcmv infection 12hr dn	98	0.128	0.103	0.10678
GO bp:go response to activity	69	0.151	0.122	0.10678
Curated gene sets:alcala apoptosis	84	0.131	0.105	0.10681
GO bp:go glutamate secretion	28	0.237	0.191	0.10684
Curated gene sets:plasari nfic targets basal up	27	0.251	0.202	0.10697
Curated gene sets:reactome meiotic recombination	82	0.165	0.132	0.10702
GO cc:go cation transporting atpase complex	15	0.354	0.285	0.10717
GO bp:go maturation of 5 8s rrna	28	0.232	0.187	0.10723
Curated gene sets:pid netrin pathway	32	0.232	0.187	0.10727
GO bp:go macroautophagy	274	0.0757	0.061	0.10729
GO mf:go rna helicase activity	64	0.153	0.123	0.10729
Curated gene sets:marzec il2 signaling dn	36	0.21	0.169	0.10737
GO bp:go detection of calcium ion	14	0.341	0.275	0.10738
GO bp:go regulation of symbiosis encompassing mutualism through parasitism	204	0.092	0.0741	0.10739
GO mf:go adenylyltransferase activity	24	0.292	0.236	0.10747
Curated gene sets:ross aml with aml1 eto fusion	73	0.148	0.12	0.10757
Curated gene sets:reactome potassium channels	97	0.129	0.104	0.10764
GO mf:go virus receptor activity	71	0.15	0.121	0.10778
Curated gene sets:gabriely mir21 targets	276	0.0779	0.0629	0.10786
GO bp:go negative regulation of substrate adhesion dependent cell spreading	13	0.318	0.257	0.10793
GO bp:go regulation of granulocyte macrophage colony stimulating factor production	16	0.279	0.226	0.10806
GO bp:go establishment of nucleus localization	14	0.298	0.241	0.10807
Curated gene sets:lein pons markers	81	0.144	0.116	0.10809
Curated gene sets:fardin hypoxia 9	7	0.478	0.386	0.10814
Curated gene sets:reactome antigen presentation folding assembly and peptide loading of class i mhc	21	0.269	0.218	0.10826
GO bp:go positive regulation of striated muscle cell differentiation	51	0.177	0.143	0.10832
Curated gene sets:reactome signalling to erks	36	0.199	0.161	0.10835
GO mf:go voltage gated calcium channel activity	40	0.198	0.161	0.10865
GO bp:go ventricular cardiac muscle cell differentiation	19	0.307	0.249	0.10867
GO bp:go dna replication checkpoint	15	0.306	0.248	0.10885
Curated gene sets:bilanges serum sensitive via tsc1	23	0.25	0.203	0.10899
GO bp:go positive regulation of nucleocytoplasmic transport	119	0.114	0.0923	0.109
GO mf:go mhc class ii protein complex binding	16	0.314	0.255	0.10906
GO cc:go filopodium	91	0.14	0.114	0.10945
Curated gene sets:pid foxo pathway	48	0.183	0.149	0.10984
Curated gene sets:wang mll targets	277	0.0782	0.0637	0.10986
GO bp:go heparan sulfate proteoglycan metabolic process	27	0.244	0.199	0.10989
GO cc:go envelope	1047	0.0389	0.0317	0.10991
GO bp:go endomembrane system organization	456	0.0574	0.0468	0.11001
GO bp:go negative regulation of ion transport	120	0.117	0.0956	0.11011
Curated gene sets:yih response to arsenite c4	17	0.324	0.264	0.1102
GO bp:go microtubule polymerization or depolymerization	39	0.189	0.155	0.11034
Curated gene sets:benporath sox2 targets	713	0.0466	0.0381	0.1106
GO bp:go negative regulation of chromosome organization	87	0.13	0.106	0.11064
Curated gene sets:bredemeyer rag signaling not via atm up	59	0.169	0.138	0.11078
GO bp:go negative regulation of macroautophagy	22	0.27	0.221	0.11081
GO bp:go positive regulation of calcium ion dependent exocytosis	25	0.258	0.211	0.11088
GO bp:go b cell receptor signaling pathway	33	0.221	0.181	0.11089
Curated gene sets:pos histamine response network	31	0.228	0.187	0.11094
GO bp:go cortical cytoskeleton organization	36	0.209	0.172	0.11102
GO mf:go phosphotransferase activity phosphate group as acceptor	36	0.196	0.16	0.11121
Curated gene sets:berenjeno transformed by rhoa up	519	0.0528	0.0433	0.11123
Curated gene sets:hedenfalk breast cancer brca1 vs brca2	157	0.0993	0.0814	0.11127
Curated gene sets:reactome signaling by fgfr1 fusion mutants	18	0.29	0.237	0.11135
Curated gene sets:vantveer breast cancer esr1 dn	232	0.083	0.0681	0.11135
GO cc:go sperm part	135	0.11	0.09	0.11136
GO bp:go negative regulation of calcium ion transport	49	0.174	0.143	0.11161
GO bp:go camp catabolic process	14	0.344	0.283	0.11196
GO bp:go receptor metabolic process	79	0.137	0.112	0.11217
GO cc:go nuclear euchromatin	23	0.264	0.217	0.11229
GO bp:go clathrin coat assembly	11	0.328	0.27	0.11241
Curated gene sets:wakabayashi adipogenesis pparg bound 8d	640	0.0498	0.041	0.11264
Curated gene sets:wu hbx targets 3 up	18	0.296	0.244	0.11266
Curated gene sets:simbulan uv response normal up	9	0.479	0.395	0.11268
Curated gene sets:rao bound by sall4 isoform a	174	0.092	0.0758	0.11269
Curated gene sets:reactome processing of intronless pre mrnas	13	0.324	0.268	0.11276
GO mf:go mitogen activated protein kinase kinase kinase binding	18	0.284	0.234	0.11278
GO bp:go transmembrane receptor protein tyrosine kinase signaling pathway	490	0.0569	0.047	0.11282
Curated gene sets:pid angiopoietin receptor pathway	48	0.165	0.136	0.1129
GO bp:go membrane hyperpolarization	11	0.401	0.331	0.1129
Curated gene sets:winnepenninckx melanoma metastasis up	158	0.0948	0.0783	0.11297
Curated gene sets:ning chronic obstructive pulmonary disease dn	118	0.114	0.0938	0.11299
GO bp:go negative regulation of axon extension	35	0.214	0.177	0.11312
GO mf:go glucuronosyltransferase activity	35	0.282	0.233	0.11331
Curated gene sets:reactome class i mhc mediated antigen processing presentation	230	0.0796	0.0658	0.11335
GO bp:go venous blood vessel development	15	0.335	0.277	0.11345
GO bp:go phosphate containing compound metabolic process	1899	0.0292	0.0242	0.11349
GO bp:go t cell proliferation	35	0.202	0.167	0.11351
Curated gene sets:whiteside cisplatin resistance dn	12	0.345	0.285	0.11365
GO bp:go sulfation	16	0.29	0.24	0.11375
GO bp:go cellular response to sterol	15	0.327	0.271	0.11375
GO bp:go ganglioside metabolic process	26	0.253	0.21	0.11382
Curated gene sets:monnier postradiation tumor escape up	383	0.0622	0.0515	0.11384
Curated gene sets:seiden oncogenesis by met	84	0.138	0.114	0.11398
Curated gene sets:krieg kdm3a targets not hypoxia	185	0.0872	0.0723	0.11398
GO bp:go regulation of respiratory gaseous exchange by neurological system process	11	0.417	0.346	0.11417
GO bp:go rostrocaudal neural tube patterning	11	0.371	0.308	0.11435
GO mf:go 3 5 dna helicase activity	12	0.331	0.275	0.11438
GO cc:go cytoplasmic mrna processing body	71	0.143	0.119	0.11466
GO bp:go negative regulation of nitrogen compound metabolic process	1433	0.0334	0.0278	0.11472
Curated gene sets:sasson fsh response	9	0.452	0.376	0.11493
GO bp:go cognition	241	0.0792	0.066	0.11496
GO bp:go mammary gland epithelial cell differentiation	16	0.316	0.263	0.11499
GO bp:go fear response	27	0.235	0.196	0.11505
Curated gene sets:mori small pre bii lymphocyte up	84	0.129	0.108	0.11518
Curated gene sets:biocarta pgc1a pathway	23	0.25	0.208	0.11534
Curated gene sets:reactome heparan sulfate heparin hs gag metabolism	46	0.183	0.153	0.11538
Curated gene sets:biocarta neurotransmitters pathway	6	0.503	0.42	0.1154
Curated gene sets:schaeffer prostate development and cancer box4 dn	32	0.208	0.174	0.11545
GO bp:go ubiquinone metabolic process	13	0.319	0.266	0.1155
GO bp:go response to amphetamine	29	0.226	0.189	0.11554
Curated gene sets:zhan multiple myeloma cd2 dn	46	0.172	0.144	0.11577
Curated gene sets:patil liver cancer	697	0.0463	0.0387	0.11584
GO bp:go negative regulation of reproductive process	52	0.174	0.146	0.11591
Curated gene sets:chung blister cytotoxicity dn	40	0.19	0.159	0.116
Curated gene sets:biocarta tff pathway	21	0.254	0.213	0.11605
GO bp:go alditol phosphate metabolic process	33	0.224	0.188	0.11609
GO bp:go regulation of heart contraction	212	0.0875	0.0733	0.1162
GO bp:go negative regulation of viral release from host cell	15	0.335	0.28	0.11626
GO bp:go dendritic spine development	16	0.321	0.269	0.1163
GO bp:go response to acidic ph	18	0.287	0.24	0.11638
GO bp:go adaptation of signaling pathway	20	0.267	0.224	0.1165
GO bp:go regulation of synaptic transmission glutamatergic	48	0.183	0.154	0.1167
GO bp:go galactose metabolic process	13	0.336	0.282	0.11689
Curated gene sets:lein localized to proximal dendrites	34	0.202	0.17	0.11701
Curated gene sets:steger adipogenesis up	21	0.267	0.224	0.11708
GO bp:go l ascorbic acid metabolic process	9	0.467	0.393	0.11709
Curated gene sets:mili pseudopodia	38	0.183	0.153	0.11712
GO cc:go chloride channel complex	42	0.225	0.189	0.11712
Curated gene sets:hoelzel nf1 targets up	120	0.117	0.0981	0.11716
GO cc:go perikaryon	103	0.123	0.103	0.11738
GO bp:go regulation of camp mediated signaling	22	0.274	0.23	0.11739
GO bp:go membrane depolarization during action potential	38	0.2	0.169	0.11743
GO bp:go peptidyl serine modification	142	0.1	0.0846	0.11749
GO bp:go positive regulation of creb transcription factor activity	14	0.344	0.29	0.11751
GO bp:go regulation of ion transport	566	0.0522	0.0439	0.11757
GO bp:go protein oligomerization	421	0.0609	0.0513	0.11758
Curated gene sets:reactome metabolism of carbohydrates	221	0.0828	0.0698	0.11761
GO bp:go negative regulation of cytoskeleton organization	207	0.0806	0.0679	0.11765
GO bp:go cellular response to prostaglandin e stimulus	17	0.328	0.276	0.11781
GO bp:go adult locomotory behavior	79	0.137	0.115	0.11789
GO cc:go methyltransferase complex	84	0.126	0.106	0.11807
GO bp:go proteasome assembly	13	0.297	0.251	0.11822
GO bp:go arp2 3 complex mediated actin nucleation	15	0.309	0.261	0.11835
GO bp:go positive regulation of interleukin 2 biosynthetic process	12	0.355	0.3	0.11842
Curated gene sets:zhan late differentiation genes up	29	0.209	0.177	0.11846
GO bp:go actin nucleation	21	0.248	0.21	0.11852
GO bp:go enteric nervous system development	11	0.393	0.333	0.11879
Curated gene sets:reactome hs gag biosynthesis	27	0.253	0.214	0.11889
GO bp:go platelet derived growth factor receptor signaling pathway	34	0.214	0.182	0.11898
Curated gene sets:reactome signaling by wnt	63	0.142	0.12	0.11909
Curated gene sets:han satb1 targets up	380	0.0631	0.0535	0.11911
GO bp:go viral life cycle	286	0.07	0.0594	0.11922
GO bp:go response to toxic substance	232	0.0773	0.0656	0.1194
Curated gene sets:zhan v2 late differentiation genes	40	0.179	0.152	0.11956
GO cc:go microtubule	389	0.0594	0.0505	0.11972
GO cc:go actin filament	65	0.153	0.13	0.11995
GO bp:go c21 steroid hormone metabolic process	25	0.226	0.192	0.12004
GO bp:go positive regulation of chondrocyte differentiation	19	0.255	0.217	0.12008
GO bp:go positive regulation of potassium ion transport	36	0.201	0.172	0.1202
GO bp:go negative regulation of wound healing	57	0.163	0.139	0.12021
GO bp:go antimicrobial humoral response	46	0.178	0.152	0.12029
Curated gene sets:pid ret pathway	39	0.186	0.159	0.12049
Curated gene sets:ferrando t all with mll enl fusion up	79	0.132	0.113	0.12049
Curated gene sets:darwiche papilloma risk high vs low up	6	0.428	0.365	0.12084
GO bp:go negative regulation of bone resorption	11	0.385	0.329	0.12089
Curated gene sets:newman ercc6 targets up	26	0.256	0.219	0.12096
Curated gene sets:kaab heart atrium vs ventricle up	234	0.08	0.0685	0.12128
GO bp:go regulation of histone phosphorylation	13	0.309	0.265	0.12149
Curated gene sets:krige response to tosedostat 24hr dn	968	0.0383	0.0328	0.12157
Curated gene sets:pid integrin a4b1 pathway	33	0.199	0.171	0.12164
GO bp:go regulation of protein complex assembly	360	0.0626	0.0537	0.12172
Curated gene sets:pid er nongenomic pathway	41	0.187	0.16	0.12175
GO bp:go phosphatidic acid metabolic process	33	0.214	0.183	0.12196
Curated gene sets:creighton akt1 signaling via mtor up	33	0.208	0.179	0.122
GO bp:go regulation of lipoprotein particle clearance	14	0.302	0.259	0.12202
GO bp:go protein localization to kinetochore	11	0.34	0.292	0.12205
GO bp:go sodium ion export	12	0.368	0.316	0.12249
Curated gene sets:biocarta rb pathway	13	0.303	0.261	0.12252
GO bp:go positive regulation of protein import	103	0.117	0.101	0.12257
Curated gene sets:waesch anaphase promoting complex	12	0.302	0.26	0.12261
Curated gene sets:baelde diabetic nephropathy up	82	0.13	0.112	0.12263
Curated gene sets:biocarta hsp27 pathway	15	0.257	0.221	0.12272
Curated gene sets:mitsiades response to aplidin up	412	0.0586	0.0505	0.12281
Curated gene sets:lu ezh2 targets dn	363	0.0623	0.0537	0.12282
GO bp:go negative regulation of chromatin modification	39	0.171	0.148	0.12286
GO bp:go nad metabolic process	51	0.161	0.139	0.123
Curated gene sets:terao aox4 targets hg up	28	0.223	0.192	0.12326
GO cc:go axon part	208	0.0856	0.074	0.12377
GO bp:go negative regulation of peptide secretion	48	0.173	0.15	0.12379
Curated gene sets:graham cml quiescent vs cml dividing up	23	0.242	0.209	0.12381
Curated gene sets:reactome elongation arrest and recovery	31	0.226	0.196	0.12389
Curated gene sets:lindgren bladder cancer cluster 1 up	112	0.113	0.0977	0.12395
Curated gene sets:rodrigues thyroid carcinoma poorly differentiated dn	745	0.0445	0.0385	0.12402
GO bp:go regulation of hydrolase activity	1265	0.0343	0.0297	0.12406
Curated gene sets:kegg lysosome	117	0.106	0.0915	0.12407
GO cc:go coated pit	64	0.147	0.127	0.12436
Curated gene sets:reactome signaling by nodal	18	0.238	0.206	0.12448
GO bp:go hypothalamus development	21	0.247	0.214	0.1245
GO bp:go endothelial tube morphogenesis	11	0.372	0.323	0.12453
GO bp:go alkaloid metabolic process	14	0.337	0.292	0.1246
Curated gene sets:chauhan response to methoxyestradiol dn	89	0.124	0.108	0.12467
GO bp:go response to steroid hormone	481	0.0549	0.0477	0.1249
Curated gene sets:davicioni targets of pax foxo1 fusions dn	65	0.149	0.13	0.12493
GO bp:go forebrain development	343	0.0653	0.0567	0.12506
GO bp:go positive regulation of actin cytoskeleton reorganization	16	0.279	0.243	0.12524
Curated gene sets:biocarta nos1 pathway	21	0.255	0.222	0.12526
Curated gene sets:reactome cytokine signaling in immune system	257	0.0766	0.0667	0.12534
Curated gene sets:ferreira ewings sarcoma unstable vs stable up	162	0.0887	0.0773	0.12544
Curated gene sets:molenaar targets of ccnd1 and cdk4 up	61	0.158	0.138	0.1256
Curated gene sets:lopez mesothelioma survival worst vs best dn	7	0.402	0.351	0.12568
GO bp:go ventricular cardiac muscle cell development	13	0.344	0.3	0.12574
Curated gene sets:kegg t cell receptor signaling pathway	104	0.113	0.0985	0.12579
GO bp:go regulation of blood vessel endothelial cell migration	48	0.171	0.149	0.1259
GO bp:go positive regulation of dna binding	42	0.187	0.163	0.12607
GO bp:go central nervous system neuron axonogenesis	26	0.234	0.205	0.12625
Curated gene sets:biocarta nthi pathway	23	0.245	0.214	0.12627
GO bp:go nuclear transport	336	0.0608	0.0531	0.12627
GO mf:go r smad binding	23	0.235	0.206	0.12641
GO bp:go regulation of cyclin dependent protein kinase activity	92	0.123	0.108	0.12643
GO bp:go regulation of mitophagy	41	0.179	0.156	0.12646
Curated gene sets:siligan targets of ews fli1 fusion up	15	0.296	0.259	0.1269
GO cc:go ruffle	152	0.0925	0.0811	0.12705
GO bp:go negative regulation of protein catabolic process	103	0.11	0.0965	0.12711
GO bp:go t cell differentiation involved in immune response	26	0.226	0.198	0.12711
Curated gene sets:reactome tandem pore domain potassium channels	12	0.364	0.319	0.12712
GO bp:go dendrite morphogenesis	39	0.196	0.172	0.12719
Curated gene sets:reactome acyl chain remodelling of pe	20	0.264	0.232	0.12723
Curated gene sets:fontaine thyroid tumor uncertain malignancy up	32	0.2	0.176	0.12753
Curated gene sets:boyault liver cancer subclass g1 up	112	0.104	0.0914	0.12759
GO bp:go phosphatidylglycerol metabolic process	29	0.211	0.186	0.12763
GO cc:go nuclear nucleosome	34	0.225	0.198	0.12771
GO bp:go regulation of transforming growth factor beta receptor signaling pathway	98	0.114	0.1	0.12784
GO bp:go regulation of cellular response to transforming growth factor beta stimulus	98	0.114	0.1	0.12784
GO bp:go positive regulation of transcription factor import into nucleus	50	0.158	0.139	0.12791
GO bp:go nitrogen compound transport	475	0.0535	0.0471	0.12796
GO bp:go transmembrane transport	1036	0.0379	0.0334	0.12806
Curated gene sets:ito pttg1 targets dn	9	0.398	0.35	0.12809
GO bp:go regulation of transcription elongation from rna polymerase ii promoter	24	0.212	0.187	0.12817
GO mf:go enzyme regulator activity	904	0.0392	0.0345	0.12817
GO bp:go regulation of nucleobase containing compound transport	12	0.304	0.267	0.12819
Curated gene sets:ren alveolar rhabdomyosarcoma up	95	0.117	0.103	0.12822
Curated gene sets:reactome cell cycle mitotic	301	0.0633	0.0558	0.12828
Curated gene sets:wei mycn targets with e box	770	0.0424	0.0374	0.12834
GO mf:go voltage gated ion channel activity	178	0.088	0.0776	0.12845
GO bp:go regulation of gtpase activity	643	0.0461	0.0407	0.12855
GO bp:go natural killer cell differentiation	12	0.364	0.321	0.12857
GO bp:go response to interferon beta	22	0.28	0.247	0.12859
Curated gene sets:riz erythroid differentiation hbz	39	0.202	0.178	0.12864
GO bp:go vesicle fusion to plasma membrane	12	0.311	0.275	0.12869
GO bp:go synaptic vesicle fusion to presynaptic active zone membrane	12	0.311	0.275	0.12869
GO bp:go positive regulation of dephosphorylation	44	0.18	0.159	0.12884
GO bp:go regulation of histone h3 k4 methylation	25	0.225	0.199	0.12891
GO mf:go poly a rna binding	1118	0.0348	0.0308	0.12896
Curated gene sets:ule splicing via nova2	42	0.182	0.161	0.12902
Curated gene sets:mcbryan pubertal breast 6 7wk up	187	0.087	0.077	0.12926
GO bp:go positive regulation of leukocyte apoptotic process	28	0.195	0.172	0.12939
Curated gene sets:reactome antigen processing cross presentation	74	0.131	0.116	0.1295
GO bp:go negative regulation of map kinase activity	70	0.135	0.12	0.12965
GO mf:go store operated calcium channel activity	10	0.336	0.298	0.12968
GO bp:go regulation of viral release from host cell	30	0.203	0.18	0.12995
Curated gene sets:gary cd5 targets up	443	0.0539	0.0478	0.12998
Curated gene sets:pid ras pathway	30	0.192	0.171	0.13004
GO cc:go perinuclear region of cytoplasm	617	0.0461	0.0409	0.13013
Curated gene sets:mili pseudopodia haptotaxis up	477	0.0534	0.0474	0.13017
Curated gene sets:reactome androgen biosynthesis	9	0.359	0.319	0.13048
GO mf:go g protein coupled photoreceptor activity	8	0.387	0.344	0.13049
GO cc:go lateral plasma membrane	49	0.165	0.147	0.13059
GO bp:go regulation of cellular protein localization	533	0.0491	0.0437	0.1306
GO bp:go cell morphogenesis involved in differentiation	493	0.0539	0.048	0.13074
GO bp:go regulation of cation transmembrane transport	200	0.0818	0.0729	0.13092
GO bp:go neuronal stem cell population maintenance	19	0.262	0.234	0.13097
GO bp:go mature b cell differentiation	17	0.288	0.256	0.13109
GO bp:go positive regulation of multicellular organismal metabolic process	23	0.232	0.207	0.13114
GO bp:go positive regulation of collagen metabolic process	23	0.232	0.207	0.13114
Curated gene sets:reactome signalling by ngf	202	0.081	0.0723	0.13132
Curated gene sets:hoffmann immature to mature b lymphocyte dn	47	0.182	0.162	0.1314
Curated gene sets:reactome map kinase activation in tlr cascade	44	0.175	0.156	0.13156
Curated gene sets:reactome p75 ntr receptor mediated signalling	71	0.133	0.119	0.13162
GO bp:go astrocyte differentiation	38	0.18	0.161	0.13162
GO bp:go regulation of rna splicing	90	0.117	0.105	0.13173
GO bp:go histone h2a acetylation	12	0.309	0.276	0.13177
GO bp:go negative regulation of natural killer cell mediated immunity	12	0.35	0.313	0.13181
GO bp:go negative regulation of natural killer cell mediated cytotoxicity	12	0.35	0.313	0.13181
Curated gene sets:neben aml with flt3 or nras up	8	0.371	0.332	0.13191
Curated gene sets:chiaradonna neoplastic transformation kras up	117	0.108	0.0965	0.13209
GO bp:go regulation of histone deacetylation	23	0.246	0.221	0.13213
GO mf:go oxidoreductase activity acting on paired donors with incorporation or reduction of molecular oxygen 2 oxoglutarate as one donor and incorporation of one atom each of oxygen into both donors	38	0.19	0.17	0.13233
Curated gene sets:liu targets of vmyb vs cmyb dn	41	0.169	0.151	0.13249
GO bp:go telencephalon development	220	0.0772	0.0693	0.1327
GO bp:go phospholipid scrambling	12	0.352	0.316	0.13278
Curated gene sets:magrangeas multiple myeloma igll vs iglk up	39	0.191	0.171	0.13281
GO mf:go cis trans isomerase activity	40	0.168	0.151	0.13289
GO bp:go negative regulation of epithelial cell differentiation	35	0.194	0.175	0.13313
Curated gene sets:frasor response to serm or fulvestrant up	22	0.251	0.226	0.13322
Curated gene sets:kegg basal cell carcinoma	55	0.164	0.148	0.13335
GO cc:go extrinsic component of plasma membrane	131	0.0983	0.0885	0.13337
Curated gene sets:lucas hnf4a targets up	54	0.146	0.132	0.13341
GO bp:go secretion	565	0.0478	0.0431	0.13341
Curated gene sets:jiang vhl targets	134	0.093	0.0839	0.1337
GO bp:go protein refolding	20	0.267	0.241	0.13383
GO bp:go mrna processing	401	0.0576	0.0519	0.13385
Curated gene sets:kegg vascular smooth muscle contraction	112	0.112	0.101	0.13387
Curated gene sets:osman bladder cancer dn	361	0.0593	0.0536	0.13401
GO bp:go striatum development	15	0.295	0.267	0.13427
GO mf:go rna methyltransferase activity	44	0.161	0.145	0.13433
GO bp:go cellular response to starvation	114	0.106	0.0959	0.13434
GO mf:go histone kinase activity	19	0.247	0.223	0.13434
GO bp:go response to lithium ion	27	0.216	0.195	0.13468
GO bp:go regulation of arf protein signal transduction	15	0.284	0.257	0.13498
GO mf:go coreceptor activity	37	0.191	0.173	0.1352
GO bp:go regulation of gastrulation	36	0.197	0.179	0.13521
Curated gene sets:reactome circadian clock	51	0.158	0.144	0.13563
Curated gene sets:vandesluis normal embryos up	5	0.486	0.442	0.13577
GO bp:go positive regulation of adherens junction organization	21	0.235	0.214	0.13594
GO bp:go cerebral cortex cell migration	39	0.165	0.151	0.13613
GO bp:go nucleobase containing small molecule interconversion	22	0.245	0.223	0.13655
Curated gene sets:farmer breast cancer basal vs lulminal	310	0.0628	0.0573	0.13659
GO bp:go regulation of interleukin 8 biosynthetic process	10	0.31	0.283	0.13662
Curated gene sets:reactome signaling by erbb4	86	0.118	0.108	0.13665
GO cc:go esc e z complex	15	0.262	0.239	0.13676
GO bp:go positive regulation of molecular function	1719	0.0282	0.0258	0.13684
Curated gene sets:mootha gluconeogenesis	28	0.201	0.183	0.13696
Curated gene sets:kegg basal transcription factors	31	0.217	0.199	0.13709
GO bp:go regulation of rna stability	137	0.0913	0.0835	0.13715
GO mf:go nucleosome binding	42	0.165	0.151	0.13721
Curated gene sets:jiang hypoxia via vhl	32	0.185	0.17	0.13754
GO bp:go protein trimerization	38	0.2	0.183	0.13754
Curated gene sets:dormoy elavl1 targets	17	0.285	0.262	0.13786
GO cc:go prespliceosome	21	0.243	0.223	0.13796
GO bp:go regulation of striated muscle cell differentiation	85	0.119	0.11	0.1381
GO bp:go regulation of sodium ion transmembrane transport	46	0.163	0.15	0.13824
GO bp:go mismatch repair	27	0.176	0.162	0.13836
Curated gene sets:mcbryan pubertal breast 5 6wk dn	130	0.101	0.0933	0.13838
GO cc:go transferase complex	663	0.044	0.0405	0.13843
Curated gene sets:biocarta parkin pathway	12	0.326	0.3	0.1386
Curated gene sets:begum targets of pax3 foxo1 fusion and pax3	7	0.478	0.44	0.13868
GO bp:go progesterone metabolic process	14	0.26	0.239	0.13869
Curated gene sets:lin npas4 targets up	159	0.085	0.0783	0.1387
GO mf:go nuclear localization sequence binding	21	0.229	0.21	0.1387
GO bp:go reciprocal dna recombination	39	0.165	0.152	0.13878
GO bp:go reciprocal meiotic recombination	39	0.165	0.152	0.13878
Curated gene sets:reactome voltage gated potassium channels	42	0.174	0.16	0.1389
Curated gene sets:lopez mesothelioma survival up	12	0.326	0.3	0.13905
GO bp:go regulation of transcription from rna polymerase ii promoter	1690	0.028	0.0258	0.13911
Curated gene sets:reactome mitotic prometaphase	82	0.117	0.108	0.13915
GO mf:go vitamin d receptor binding	15	0.306	0.282	0.13916
Curated gene sets:verrecchia delayed response to tgfb1	39	0.178	0.165	0.13928
GO bp:go regulation of cysteine type endopeptidase activity involved in apoptotic signaling pathway	22	0.243	0.224	0.13929
GO bp:go cell division	446	0.0507	0.0468	0.1394
GO bp:go nuclear envelope organization	81	0.113	0.104	0.13949
GO bp:go atp generation from adp	35	0.167	0.154	0.13958
Curated gene sets:tenedini megakaryocyte markers	65	0.134	0.124	0.13963
GO bp:go protein targeting to mitochondrion	50	0.157	0.145	0.13975
Curated gene sets:benporath proliferation	145	0.0892	0.0825	0.13985
Curated gene sets:pilon klf1 targets dn	1903	0.0266	0.0246	0.13992
GO cc:go pericentric heterochromatin	14	0.282	0.261	0.13992
Curated gene sets:azare stat3 targets	23	0.202	0.187	0.13996
GO bp:go positive regulation of erythrocyte differentiation	22	0.246	0.228	0.13999
GO bp:go positive regulation of muscle cell differentiation	83	0.123	0.114	0.14018
GO bp:go homophilic cell adhesion via plasma membrane adhesion molecules	145	0.121	0.112	0.14028
GO bp:go positive regulation of cellular amine metabolic process	11	0.344	0.319	0.14029
Curated gene sets:reactome trafficking of ampa receptors	25	0.234	0.216	0.14033
Curated gene sets:kegg proximal tubule bicarbonate reclamation	22	0.239	0.222	0.14045
Curated gene sets:kreppel cd99 targets dn	8	0.405	0.376	0.1405
Curated gene sets:wang targets of mll cbp fusion up	42	0.176	0.163	0.14051
Curated gene sets:reactome activation of the ap1 family of transcription factors	10	0.353	0.328	0.14058
Curated gene sets:reactome glycolysis	24	0.19	0.176	0.14073
GO bp:go exocytosis	295	0.0638	0.0592	0.14074
GO bp:go protein localization to chromosome centromeric region	13	0.306	0.284	0.14075
GO mf:go alpha actinin binding	21	0.24	0.222	0.14076
Curated gene sets:kegg type ii diabetes mellitus	47	0.162	0.15	0.1408
Curated gene sets:farmer breast cancer cluster 6	16	0.298	0.277	0.1408
GO bp:go cellular protein complex disassembly	124	0.0965	0.0897	0.141
Curated gene sets:reactome nrage signals death through jnk	37	0.189	0.175	0.14112
GO bp:go female sex differentiation	111	0.104	0.0968	0.14143
Curated gene sets:reactome ctla4 inhibitory signaling	21	0.248	0.231	0.14159
Curated gene sets:finetti breast cancers kinome blue	20	0.255	0.238	0.1417
Curated gene sets:lu tumor endothelial markers up	20	0.237	0.221	0.1417
GO bp:go positive regulation of viral process	91	0.118	0.11	0.1417
Curated gene sets:mense hypoxia up	93	0.114	0.106	0.14188
GO bp:go negative regulation of telomere maintenance via telomerase	11	0.341	0.319	0.14198
Curated gene sets:sasai targets of cxcr6 and ptch1 up	11	0.329	0.307	0.14204
GO cc:go primary lysosome	17	0.289	0.27	0.14208
GO bp:go positive regulation of response to extracellular stimulus	48	0.149	0.139	0.14215
GO bp:go positive regulation of response to nutrient levels	48	0.149	0.139	0.14215
Curated gene sets:demagalhaes aging dn	14	0.302	0.282	0.14221
GO bp:go regulation of lamellipodium organization	35	0.195	0.182	0.14223
GO bp:go protein export from nucleus	30	0.178	0.167	0.14237
Curated gene sets:ngo malignant glioma 1p loh	15	0.323	0.302	0.14252
Curated gene sets:mikkelsen mcv6 icp with h3k4me3 and h3k27me3	32	0.197	0.184	0.14265
GO bp:go positive regulation of protein export from nucleus	18	0.241	0.226	0.14279
GO bp:go embryonic camera type eye development	35	0.199	0.187	0.14282
GO bp:go olfactory lobe development	35	0.195	0.183	0.14293
Curated gene sets:iritani mad1 targets up	13	0.297	0.278	0.14304
GO bp:go mitochondrial transmembrane transport	56	0.143	0.134	0.14312
GO mf:go translation factor activity rna binding	82	0.114	0.107	0.14331
GO bp:go neuron projection regeneration	31	0.203	0.19	0.14337
Curated gene sets:nakayama soft tissue tumors pca2 dn	73	0.123	0.116	0.14342
Curated gene sets:reactome activation of bh3 only proteins	16	0.297	0.279	0.14347
GO bp:go camp metabolic process	34	0.187	0.175	0.14361
Curated gene sets:bild myc oncogenic signature	194	0.0771	0.0726	0.14423
Curated gene sets:mikkelsen dedifferentiated state dn	7	0.35	0.33	0.14432
GO bp:go negative regulation of cellular protein catabolic process	61	0.129	0.121	0.14433
Curated gene sets:raghavachari platelet specific genes	65	0.137	0.129	0.14436
GO bp:go positive regulation of mrna processing	31	0.202	0.19	0.14444
Curated gene sets:ferrando t all with mll enl fusion dn	84	0.111	0.105	0.14448
GO bp:go regulation of serine type peptidase activity	12	0.348	0.328	0.14456
GO bp:go regulation of serine type endopeptidase activity	12	0.348	0.328	0.14456
GO mf:go phospholipase binding	16	0.271	0.256	0.14461
GO bp:go cellular response to dexamethasone stimulus	27	0.2	0.189	0.14482
Curated gene sets:reactome g2 m checkpoints	41	0.158	0.149	0.14483
Curated gene sets:zwang egf interval up	88	0.119	0.112	0.14488
GO bp:go platelet aggregation	37	0.195	0.184	0.14491
GO bp:go regulation of ceramide biosynthetic process	11	0.346	0.328	0.1451
GO cc:go rnai effector complex	11	0.365	0.346	0.14527
Curated gene sets:schuringa stat5a targets dn	15	0.298	0.282	0.14558
GO bp:go negative regulation of leukocyte mediated immunity	44	0.178	0.169	0.14574
Curated gene sets:shepard crush and burn mutant dn	179	0.081	0.0768	0.14577
Curated gene sets:wang response to gsk3 inhibitor sb216763 up	344	0.0561	0.0532	0.14598
Curated gene sets:bystrykh scp2 qtl	5	0.464	0.44	0.14611
GO bp:go regulation of n methyl d aspartate selective glutamate receptor activity	14	0.283	0.269	0.14625
GO mf:go protein tyrosine kinase activator activity	14	0.296	0.282	0.14641
Curated gene sets:biocarta classic pathway	12	0.325	0.309	0.14642
GO bp:go establishment or maintenance of cell polarity	138	0.0946	0.09	0.14645
Curated gene sets:firestein ctnnb1 pathway and proliferation	6	0.495	0.47	0.14646
Curated gene sets:reactome rna pol i transcription	83	0.138	0.131	0.14647
Curated gene sets:vilimas notch1 targets dn	18	0.246	0.235	0.14701
GO bp:go negative regulation of protein autophosphorylation	11	0.327	0.311	0.14716
GO bp:go regulation of sodium ion transmembrane transporter activity	36	0.174	0.166	0.14728
GO bp:go behavioral response to cocaine	12	0.339	0.324	0.14732
Curated gene sets:mahadevan gist morphological switch	15	0.295	0.282	0.14738
GO bp:go growth plate cartilage development	12	0.343	0.328	0.14744
Curated gene sets:sato silenced by methylation in pancreatic cancer 2	41	0.165	0.157	0.14747
GO bp:go golgi organization	84	0.11	0.105	0.1476
Curated gene sets:rashi response to ionizing radiation 1	43	0.17	0.163	0.14763
Curated gene sets:pid pi3kci akt pathway	34	0.18	0.172	0.14766
Curated gene sets:guenther growth spherical vs adherent up	20	0.252	0.241	0.14771
Curated gene sets:wang recurrent liver cancer up	16	0.257	0.246	0.14798
GO bp:go cellular response to inorganic substance	154	0.0912	0.0873	0.14798
GO cc:go ampa glutamate receptor complex	24	0.221	0.211	0.14805
GO cc:go supramolecular fiber	647	0.0459	0.0439	0.14812
GO bp:go regulation of peptidyl serine phosphorylation	113	0.104	0.1	0.1482
GO bp:go low density lipoprotein particle remodeling	11	0.332	0.318	0.14831
GO bp:go regulation of interleukin 6 biosynthetic process	16	0.287	0.275	0.14838
Curated gene sets:taylor methylated in acute lymphoblastic leukemia	77	0.12	0.115	0.14842
GO bp:go single organism membrane fusion	123	0.0895	0.0858	0.1486
GO bp:go regulation of the force of heart contraction	28	0.216	0.207	0.14867
GO bp:go response to phenylpropanoid	12	0.292	0.28	0.14868
Curated gene sets:basso b lymphocyte network	137	0.0905	0.0869	0.14879
GO mf:go type i interferon receptor binding	17	0.507	0.487	0.14881
Curated gene sets:turjanski mapk1 and mapk2 targets	11	0.359	0.345	0.14885
GO bp:go golgi localization	12	0.32	0.307	0.14885
Curated gene sets:yang muc2 targets duodenum 6mo up	10	0.334	0.321	0.14887
Curated gene sets:dittmer pthlh targets dn	73	0.126	0.121	0.14891
GO bp:go interaction with host	135	0.0907	0.0871	0.14891
Curated gene sets:pid ps1 pathway	45	0.146	0.14	0.14895
GO mf:go neutral amino acid transmembrane transporter activity	30	0.199	0.191	0.14895
GO mf:go transmembrane transporter activity	941	0.0367	0.0353	0.149
GO bp:go negative regulation of cell adhesion	216	0.0724	0.0696	0.1492
GO bp:go positive regulation of calcium mediated signaling	38	0.166	0.159	0.14923
GO bp:go negative regulation of cellular response to insulin stimulus	31	0.189	0.182	0.14927
Curated gene sets:teramoto opn targets cluster 3	6	0.544	0.523	0.14939
GO bp:go regulation of type i interferon mediated signaling pathway	38	0.209	0.201	0.14941
GO mf:go guanyl nucleotide exchange factor activity	290	0.0613	0.059	0.1495
GO bp:go regulation of cardiac muscle cell differentiation	19	0.242	0.233	0.14955
GO bp:go regulation of neurotransmitter transport	60	0.137	0.132	0.14967
GO cc:go proteasome complex	76	0.121	0.117	0.14997
GO mf:go ribonucleotide binding	1760	0.0263	0.0253	0.15009
GO bp:go positive regulation of alpha beta t cell proliferation	19	0.24	0.232	0.15035
GO bp:go regulation of chemotaxis	174	0.0829	0.0801	0.1504
GO mf:go ran gtpase binding	31	0.173	0.167	0.1504
GO bp:go cellular response to estrogen stimulus	40	0.172	0.166	0.15041
Curated gene sets:reactome transcriptional activity of smad2 smad3 smad4 heterotrimer	36	0.178	0.172	0.15057
Curated gene sets:biocarta hif pathway	15	0.252	0.244	0.15068
GO cc:go dendritic shaft	33	0.184	0.178	0.15085
Curated gene sets:kegg parkinsons disease	111	0.0945	0.0916	0.15101
GO bp:go regulation of axonogenesis	159	0.0835	0.0809	0.15101
GO mf:go cadherin binding	28	0.182	0.176	0.15113
GO cc:go cell leading edge	341	0.0572	0.0555	0.15131
Curated gene sets:wilcox response to progesterone dn	60	0.146	0.142	0.15132
Curated gene sets:reactome opsins	7	0.354	0.343	0.15138
GO bp:go cell cycle g1 s phase transition	105	0.0983	0.0954	0.15156
GO bp:go g1 s transition of mitotic cell cycle	105	0.0983	0.0954	0.15156
GO bp:go receptor clustering	39	0.159	0.154	0.15173
GO bp:go positive regulation of phosphatase activity	26	0.216	0.209	0.15175
GO bp:go regulation of neuroblast proliferation	28	0.191	0.186	0.1518
Curated gene sets:amit egf response 60 hela	43	0.169	0.165	0.15185
GO bp:go negative regulation of dna repair	14	0.248	0.241	0.15188
Curated gene sets:reactome apobec3g mediated resistance to hiv1 infection	5	0.395	0.385	0.15207
GO bp:go rna methylation	52	0.14	0.137	0.15207
GO bp:go cell communication by electrical coupling	15	0.298	0.29	0.15214
GO bp:go hindbrain development	133	0.0922	0.0897	0.15217
GO bp:go movement in environment of other organism involved in symbiotic interaction	88	0.11	0.107	0.1523
GO bp:go entry into cell of other organism involved in symbiotic interaction	88	0.11	0.107	0.1523
GO bp:go viral entry into host cell	88	0.11	0.107	0.1523
GO bp:go entry into other organism involved in symbiotic interaction	88	0.11	0.107	0.1523
GO bp:go movement in host environment	88	0.11	0.107	0.1523
GO bp:go entry into host	88	0.11	0.107	0.1523
GO bp:go entry into host cell	88	0.11	0.107	0.1523
GO bp:go positive regulation of protein localization to cell periphery	36	0.175	0.171	0.15238
GO bp:go positive regulation of protein localization to plasma membrane	36	0.175	0.171	0.15238
Curated gene sets:mootha pyr	6	0.386	0.376	0.1524
GO bp:go positive regulation of immunoglobulin secretion	11	0.283	0.276	0.15242
GO mf:go calcium channel regulator activity	38	0.171	0.167	0.15252
GO bp:go regulation of calcium mediated signaling	72	0.122	0.119	0.15253
GO cc:go neuronal postsynaptic density	51	0.138	0.134	0.15253
Curated gene sets:wakabayashi adipogenesis pparg rxra bound 8d	862	0.0365	0.0356	0.15286
Curated gene sets:reactome grb2 events in erbb2 signaling	22	0.223	0.217	0.15287
GO bp:go cellular response to electrical stimulus	14	0.276	0.27	0.15303
GO bp:go regulation of myoblast proliferation	11	0.296	0.289	0.15303
GO bp:go ovulation	18	0.232	0.227	0.15345
Curated gene sets:reactome processing of capped intron containing pre mrna	131	0.0898	0.0879	0.15354
GO bp:go positive regulation of binding	125	0.0957	0.0937	0.15355
GO bp:go oxidative demethylation	12	0.294	0.288	0.15355
GO bp:go regulation of stem cell proliferation	89	0.113	0.111	0.15365
GO mf:go receptor agonist activity	16	0.266	0.261	0.15366
Curated gene sets:lindgren bladder cancer with loh in chr9q	115	0.105	0.103	0.1541
Curated gene sets:gross hypoxia via elk3 up	205	0.0685	0.0672	0.15414
Curated gene sets:reactome signal regulatory protein sirp family interactions	11	0.353	0.347	0.15418
GO bp:go negative regulation of catabolic process	195	0.0726	0.0713	0.15424
GO bp:go positive regulation of cellular component biogenesis	387	0.053	0.0521	0.15441
GO bp:go mitochondrial atp synthesis coupled proton transport	17	0.243	0.239	0.15441
GO bp:go positive regulation of mesenchymal cell proliferation	27	0.219	0.215	0.15443
Curated gene sets:bidus metastasis up	197	0.0724	0.0711	0.15444
GO bp:go positive regulation of transforming growth factor beta production	14	0.284	0.279	0.15445
GO bp:go acid secretion	67	0.128	0.126	0.1545
GO mf:go protein tyrosine kinase binding	55	0.143	0.14	0.1546
Curated gene sets:shipp dlbcl cured vs fatal dn	40	0.153	0.151	0.15464
Curated gene sets:coldren gefitinib resistance up	80	0.111	0.11	0.15493
GO bp:go mitochondrial rna processing	13	0.254	0.25	0.15502
GO bp:go receptor internalization	50	0.145	0.143	0.1552
Curated gene sets:gerhold adipogenesis up	48	0.151	0.149	0.15526
Curated gene sets:huttmann b cll poor survival dn	57	0.136	0.134	0.15533
Curated gene sets:wong endometrial cancer late	9	0.321	0.317	0.15534
GO bp:go thalamus development	14	0.294	0.29	0.15534
Curated gene sets:biocarta akap13 pathway	12	0.3	0.296	0.1554
GO bp:go glycerophospholipid catabolic process	13	0.278	0.274	0.15545
GO cc:go organellar small ribosomal subunit	26	0.194	0.191	0.15564
GO cc:go chromosome	840	0.0361	0.0357	0.15581
Curated gene sets:biocarta wnt pathway	26	0.191	0.188	0.15591
Curated gene sets:reactome sos mediated signalling	14	0.266	0.263	0.15596
Curated gene sets:flotho pediatric all therapy response up	52	0.143	0.141	0.15612
Curated gene sets:biocarta p38mapk pathway	39	0.159	0.158	0.15616
GO mf:go rho guanyl nucleotide exchange factor activity	71	0.123	0.122	0.1563
GO mf:go adenyl nucleotide binding	1440	0.028	0.0277	0.15633
Curated gene sets:kumar autophagy network	66	0.119	0.118	0.15634
Curated gene sets:reactome apoptotic cleavage of cellular proteins	34	0.175	0.173	0.15652
Curated gene sets:liu liver cancer	33	0.17	0.169	0.15665
Curated gene sets:cheok response to mercaptopurine and ld mtx up	8	0.388	0.385	0.15678
Curated gene sets:reactome cd28 dependent vav1 pathway	11	0.302	0.3	0.15689
Curated gene sets:lee targets of ptch1 and sufu up	53	0.14	0.139	0.15699
GO bp:go n acetylglucosamine metabolic process	14	0.304	0.302	0.15699
Curated gene sets:reactome activated ampk stimulates fatty acid oxidation in muscle	18	0.234	0.232	0.15708
Curated gene sets:kohoutek ccnt2 targets	57	0.13	0.129	0.15713
Curated gene sets:valk aml cluster 11	36	0.184	0.183	0.15728
GO bp:go regulation of glomerulus development	12	0.33	0.328	0.1573
Curated gene sets:pid ecadherin nascent aj pathway	39	0.153	0.152	0.15741
GO bp:go positive regulation of cellular component organization	1107	0.0315	0.0313	0.15753
Curated gene sets:biocarta epo pathway	17	0.256	0.255	0.15769
GO bp:go negative regulation of cell killing	18	0.254	0.254	0.15793
Curated gene sets:gozgit esr1 targets dn	696	0.0406	0.0405	0.1581
Curated gene sets:hofmann myelodysplastic syndrom high risk dn	20	0.222	0.222	0.15834
Curated gene sets:figueroa aml methylation cluster 3 dn	38	0.146	0.146	0.15872
Curated gene sets:kegg fc gamma r mediated phagocytosis	95	0.106	0.106	0.15879
Curated gene sets:kannan tp53 targets dn	21	0.221	0.222	0.15887
GO bp:go oxaloacetate metabolic process	11	0.343	0.344	0.15895
GO bp:go regulation of guanylate cyclase activity	13	0.308	0.308	0.15901
GO bp:go negative regulation of bone remodeling	13	0.306	0.307	0.15941
GO mf:go snorna binding	25	0.205	0.205	0.15944
GO cc:go proteasome accessory complex	23	0.201	0.202	0.1597
GO mf:go structure specific dna binding	110	0.0889	0.0893	0.15973
GO bp:go negative regulation of organelle organization	361	0.0517	0.052	0.15984
GO bp:go positive regulation of cartilage development	30	0.177	0.177	0.15992
GO bp:go peroxisome organization	31	0.176	0.177	0.16001
Curated gene sets:abbud lif signaling 1 dn	23	0.201	0.202	0.16023
GO bp:go regulation of protein localization	913	0.0337	0.034	0.16033
Curated gene sets:cui glucose deprivation	59	0.129	0.13	0.16035
GO bp:go canonical wnt signaling pathway	89	0.107	0.108	0.16036
GO mf:go sodium ion transmembrane transporter activity	131	0.0908	0.0915	0.16054
Curated gene sets:kuninger igf1 vs pdgfb targets up	79	0.109	0.11	0.1609
Curated gene sets:hofmann myelodysplastic syndrom low risk dn	27	0.173	0.175	0.16092
Curated gene sets:peng leucine deprivation dn	181	0.0727	0.0734	0.16098
GO bp:go regulation of tumor necrosis factor biosynthetic process	18	0.254	0.257	0.16118
GO bp:go meiosis i	84	0.106	0.107	0.16131
GO mf:go fibroblast growth factor receptor binding	27	0.193	0.195	0.1615
GO bp:go humoral immune response mediated by circulating immunoglobulin	35	0.193	0.195	0.16154
GO bp:go atp dependent chromatin remodeling	71	0.115	0.116	0.16183
GO bp:go regulation of actin filament based process	300	0.0574	0.0583	0.16213
GO bp:go positive regulation of fibroblast proliferation	54	0.139	0.141	0.16214
Curated gene sets:zhan multiple myeloma lb up	41	0.151	0.154	0.16272
Curated gene sets:bogni treatment related myeloid leukemia dn	30	0.177	0.18	0.16282
Curated gene sets:chuang oxidative stress response up	27	0.212	0.216	0.16285
Curated gene sets:graessmann response to mc and doxorubicin dn	740	0.0364	0.037	0.16315
GO mf:go secondary active transmembrane transporter activity	221	0.0708	0.0722	0.16324
Curated gene sets:kumar targets of mll af9 fusion	382	0.0519	0.0529	0.1633
Curated gene sets:reactome sema3a pak dependent axon repulsion	13	0.275	0.28	0.16341
Curated gene sets:nelson response to androgen dn	19	0.22	0.224	0.16341
Curated gene sets:reactome activation of nmda receptor upon glutamate binding and postsynaptic events	33	0.183	0.187	0.16354
Curated gene sets:kegg epithelial cell signaling in helicobacter pylori infection	66	0.122	0.125	0.16362
Curated gene sets:pid ecadherin stabilization pathway	42	0.14	0.143	0.16362
GO bp:go positive regulation of nervous system development	419	0.0495	0.0505	0.16363
GO mf:go amine binding	9	0.322	0.329	0.16366
GO bp:go protein localization to organelle	535	0.0423	0.0432	0.16374
GO bp:go mitotic g2 dna damage checkpoint	12	0.291	0.297	0.16382
GO bp:go meiotic chromosome segregation	62	0.123	0.126	0.16387
GO bp:go mrna modification	10	0.343	0.351	0.16389
Curated gene sets:reactome apoptotic execution phase	48	0.135	0.138	0.16403
GO bp:go negative regulation of cation channel activity	32	0.191	0.195	0.16403
GO bp:go multi organism membrane organization	31	0.169	0.173	0.16404
Curated gene sets:wang barretts esophagus and esophagus cancer dn	35	0.161	0.165	0.16411
GO bp:go response to mercury ion	16	0.23	0.235	0.16414
GO bp:go small gtpase mediated signal transduction	335	0.0537	0.0549	0.16415
Curated gene sets:kegg pantothenate and coa biosynthesis	16	0.25	0.255	0.16427
Curated gene sets:farmer breast cancer cluster 5	18	0.266	0.272	0.16473
Curated gene sets:reactome synthesis and interconversion of nucleotide di and triphosphates	18	0.257	0.264	0.16477
GO bp:go response to muramyl dipeptide	15	0.249	0.255	0.16479
GO cc:go lamellipodium	167	0.0756	0.0776	0.16497
GO bp:go ectoderm development	19	0.219	0.224	0.165
GO mf:go cation transmembrane transporter activity	594	0.0427	0.0438	0.16504
Curated gene sets:kegg gap junction	88	0.109	0.112	0.16532
Curated gene sets:amundson genotoxic signature	98	0.0999	0.103	0.16535
Curated gene sets:reactome class c 3 metabotropic glutamate pheromone receptors	14	0.282	0.29	0.16543
GO bp:go positive regulation of organelle assembly	47	0.134	0.137	0.16544
GO bp:go cytokine production	118	0.0932	0.0958	0.16545
GO bp:go positive regulation of atpase activity	40	0.146	0.151	0.16545
GO bp:go glucose catabolic process	25	0.173	0.178	0.16551
GO mf:go cation channel activity	287	0.06	0.0617	0.16551
Curated gene sets:zembutsu sensitivity to doxorubicin	15	0.222	0.228	0.16566
Curated gene sets:roversi glioma loh regions	44	0.184	0.189	0.16573
GO cc:go acrosomal vesicle	90	0.104	0.107	0.16575
Curated gene sets:whitfield cell cycle m g1	140	0.0831	0.0855	0.16576
GO bp:go regulation of neuron death	243	0.0639	0.0658	0.16587
GO bp:go b cell proliferation	37	0.205	0.212	0.16591
Curated gene sets:plasari tgfb1 signaling via nfic 10hr up	52	0.136	0.14	0.16594
Curated gene sets:reactome bmal1 clock npas2 activates circadian expression	35	0.169	0.175	0.16599
Curated gene sets:chicas rb1 targets low serum	89	0.103	0.106	0.16601
GO bp:go positive regulation of transcription regulatory region dna binding	14	0.27	0.278	0.16605
Curated gene sets:kim tial1 targets	31	0.188	0.194	0.16608
GO bp:go positive regulation of lamellipodium assembly	15	0.254	0.262	0.1662
Curated gene sets:sartipy blunted by insulin resistance dn	18	0.244	0.251	0.16622
GO bp:go protein localization to chromosome	44	0.142	0.147	0.16653
Curated gene sets:gross elk3 targets up	26	0.179	0.185	0.16661
GO bp:go maturation of lsu rrna	13	0.242	0.251	0.16671
GO mf:go nucleoside triphosphatase regulator activity	314	0.0553	0.0572	0.16683
GO bp:go negative regulation of catalytic activity	790	0.0355	0.0367	0.16685
Curated gene sets:gratias retinoblastoma 16q24	17	0.257	0.266	0.16691
GO bp:go developmental growth involved in morphogenesis	99	0.102	0.105	0.16693
GO bp:go chromatin silencing	84	0.115	0.119	0.16695
Curated gene sets:landis erbb2 breast tumors 65 dn	35	0.183	0.189	0.16699
GO bp:go regulation of protein deacetylation	33	0.181	0.187	0.16706
Curated gene sets:basaki ybx1 targets dn	350	0.0531	0.055	0.16711
Curated gene sets:reactome ethanol oxidation	9	0.408	0.422	0.16732
Curated gene sets:reactome degradation of the extracellular matrix	27	0.179	0.185	0.16737
Curated gene sets:liu vav3 prostate carcinogenesis up	85	0.112	0.116	0.16775
GO bp:go negative regulation of cellular catabolic process	150	0.0778	0.0808	0.16783
GO mf:go atpase activity	409	0.049	0.0509	0.16784
GO bp:go antigen processing and presentation of exogenous peptide antigen via mhc class i	65	0.115	0.12	0.16797
GO bp:go positive regulation of hydrolase activity	872	0.0339	0.0353	0.16808
Curated gene sets:kim wt1 targets up	213	0.0669	0.0696	0.16824
Curated gene sets:yagi aml with t 9 11 translocation	123	0.0898	0.0934	0.16827
Curated gene sets:reactome m g1 transition	77	0.1	0.104	0.16839
Curated gene sets:ouellet ovarian cancer invasive vs lmp up	114	0.0901	0.0938	0.16842
GO mf:go oxidoreductase activity acting on a heme group of donors	24	0.187	0.195	0.16855
Curated gene sets:reactome traf6 mediated irf7 activation	30	0.216	0.225	0.16859
Curated gene sets:farmer breast cancer cluster 3	16	0.236	0.246	0.16867
GO bp:go metal ion transport	559	0.0426	0.0444	0.16869
GO bp:go ion transmembrane transport	776	0.0368	0.0384	0.1688
GO bp:go positive regulation of peptidyl serine phosphorylation	86	0.114	0.119	0.16885
Curated gene sets:korkola teratoma up	12	0.279	0.291	0.16912
GO bp:go cell migration involved in heart development	14	0.27	0.282	0.16913
Curated gene sets:laiho colorectal cancer serrated dn	65	0.114	0.119	0.16919
Curated gene sets:nikolsky breast cancer 21q22 amplicon	15	0.411	0.429	0.16936
GO bp:go positive regulation of natural killer cell activation	18	0.219	0.229	0.16943
Curated gene sets:reactome apc c cdc20 mediated degradation of cyclin b	19	0.218	0.229	0.16973
GO cc:go pre autophagosomal structure membrane	15	0.276	0.289	0.17007
Curated gene sets:reactome regulation of mrna stability by proteins that bind au rich elements	82	0.101	0.106	0.17015
GO mf:go nitric oxide synthase binding	18	0.25	0.263	0.17015
GO bp:go negative regulation of cell differentiation	591	0.0414	0.0435	0.17019
GO bp:go b cell mediated immunity	61	0.137	0.144	0.17031
Curated gene sets:reactome formation of tubulin folding intermediates by cct tric	22	0.201	0.212	0.17046
Curated gene sets:ji carcinogenesis by kras and stk11 dn	16	0.272	0.285	0.17056
GO bp:go positive regulation of neutrophil migration	26	0.189	0.198	0.17068
Curated gene sets:kauffmann dna replication genes	137	0.0776	0.0816	0.17075
Curated gene sets:valk aml cluster 1	25	0.213	0.224	0.17082
GO bp:go positive regulation of tyrosine phosphorylation of stat5 protein	16	0.248	0.261	0.17083
Curated gene sets:yauch hedgehog signaling paracrine up	139	0.0797	0.0838	0.17086
GO bp:go positive regulation of response to external stimulus	292	0.0582	0.0612	0.17086
Curated gene sets:reactome metabolism of steroid hormones and vitamins a and d	34	0.159	0.167	0.17092
Curated gene sets:biocarta pml pathway	17	0.22	0.231	0.17099
GO bp:go regulation of metal ion transport	315	0.056	0.059	0.17101
Curated gene sets:mody hippocampus neonatal	34	0.162	0.17	0.17104
Curated gene sets:biocarta par1 pathway	35	0.163	0.172	0.17107
Curated gene sets:gentile uv response cluster d1	18	0.266	0.28	0.17113
GO bp:go regulation of muscle cell differentiation	149	0.0775	0.0816	0.17118
Curated gene sets:zhan multiple myeloma up	60	0.129	0.135	0.17122
Curated gene sets:pid ephb fwd pathway	39	0.145	0.153	0.17135
Curated gene sets:reactome synthesis of pa	27	0.19	0.201	0.1715
GO bp:go hexose catabolic process	46	0.13	0.137	0.17154
Curated gene sets:iwanaga carcinogenesis by kras pten up	165	0.0741	0.0782	0.17157
Curated gene sets:reactome nitric oxide stimulates guanylate cyclase	25	0.185	0.196	0.17165
GO bp:go axon regeneration	22	0.203	0.214	0.17193
Curated gene sets:kegg gnrh signaling pathway	98	0.103	0.109	0.17195
GO mf:go co smad binding	9	0.307	0.325	0.17195
GO bp:go protein import into nucleus translocation	28	0.179	0.189	0.17197
Curated gene sets:biocarta myosin pathway	29	0.178	0.188	0.17204
GO cc:go euchromatin	28	0.177	0.187	0.17205
GO bp:go regulation of release of sequestered calcium ion into cytosol by sarcoplasmic reticulum	23	0.221	0.234	0.17216
GO bp:go disruption of cells of other organism	26	0.21	0.222	0.17226
GO bp:go killing of cells of other organism	26	0.21	0.222	0.17226
GO bp:go dolichol linked oligosaccharide biosynthetic process	20	0.232	0.245	0.17262
GO bp:go oligosaccharide lipid intermediate biosynthetic process	20	0.232	0.245	0.17262
Curated gene sets:ginestier breast cancer 20q13 amplification dn	158	0.0735	0.0779	0.17263
Curated gene sets:deurig t cell prolymphocytic leukemia up	349	0.0514	0.0545	0.17281
GO bp:go mitochondrial calcium ion transport	11	0.337	0.358	0.17311
GO mf:go ubiquitin like protein transferase activity	398	0.0482	0.0512	0.17315
GO bp:go regulation of t cell proliferation	139	0.0846	0.0899	0.17321
Curated gene sets:ramalho stemness up	200	0.0663	0.0705	0.17335
GO bp:go negative regulation of cyclin dependent protein kinase activity	32	0.169	0.179	0.17348
Curated gene sets:pid arf6 trafficking pathway	48	0.132	0.14	0.1735
GO bp:go rna processing	786	0.0345	0.0367	0.17378
GO bp:go protein depolymerization	25	0.194	0.207	0.17389
Curated gene sets:poola invasive breast cancer dn	130	0.085	0.0906	0.1742
GO mf:go gtpase activating protein binding	14	0.221	0.236	0.17429
Curated gene sets:mariadason response to butyrate curcumin sulindac tsa 8	14	0.247	0.263	0.17434
GO cc:go small ribosomal subunit	63	0.115	0.123	0.17436
GO bp:go forelimb morphogenesis	39	0.161	0.172	0.17437
GO bp:go regulation of epidermis development	62	0.116	0.124	0.17445
GO mf:go disulfide oxidoreductase activity	30	0.188	0.201	0.17471
GO bp:go interleukin 1 production	15	0.244	0.261	0.17481
GO bp:go regulation of response to reactive oxygen species	31	0.166	0.177	0.17491
Curated gene sets:reactome p53 dependent g1 dna damage response	54	0.121	0.13	0.17509
GO cc:go atpase complex	23	0.202	0.216	0.17518
GO bp:go regulation of response to cytokine stimulus	138	0.0861	0.0922	0.17538
GO mf:go glutamate receptor activity	26	0.197	0.212	0.17546
GO bp:go neurotransmitter uptake	15	0.252	0.27	0.17565
Curated gene sets:keshelava multiple drug resistance	80	0.104	0.111	0.17567
GO bp:go cellular response to epinephrine stimulus	12	0.302	0.324	0.17581
GO bp:go protein k11 linked ubiquitination	26	0.188	0.202	0.17591
Curated gene sets:benporath es core nine	8	0.334	0.359	0.17594
Curated gene sets:pid s1p s1p4 pathway	14	0.239	0.256	0.17595
GO bp:go regulation of chronic inflammatory response	10	0.301	0.324	0.17604
GO bp:go response to thyroid hormone	21	0.212	0.228	0.17612
GO cc:go t tubule	45	0.15	0.161	0.17613
GO mf:go enzyme activator activity	448	0.0445	0.0479	0.17618
GO bp:go neural tube patterning	33	0.151	0.163	0.17633
GO bp:go positive regulation of potassium ion transmembrane transporter activity	16	0.218	0.235	0.17634
Curated gene sets:zwang transiently up by 1st egf pulse only	1599	0.0248	0.0267	0.1765
GO bp:go regulation of cgmp biosynthetic process	22	0.209	0.225	0.17653
Curated gene sets:galie tumor stemness genes	6	0.406	0.438	0.17669
GO bp:go cyclic nucleotide catabolic process	17	0.23	0.248	0.17676
GO cc:go anchoring junction	474	0.0442	0.0476	0.17676
GO bp:go activation of transmembrane receptor protein tyrosine kinase activity	12	0.274	0.295	0.1769
GO mf:go receptor inhibitor activity	11	0.27	0.291	0.17696
Curated gene sets:reactome netrin1 signaling	37	0.169	0.182	0.17699
Curated gene sets:pid igf1 pathway	30	0.166	0.179	0.17714
Curated gene sets:pid ecadherin keratinocyte pathway	21	0.179	0.193	0.17722
GO mf:go organophosphate ester transmembrane transporter activity	21	0.205	0.221	0.17737
GO bp:go embryonic skeletal system development	123	0.0918	0.0992	0.17739
GO bp:go cation transport	763	0.0354	0.0383	0.17739
GO mf:go binding bridging	167	0.0733	0.0793	0.17751
GO cc:go dna packaging complex	100	0.139	0.15	0.17752
Curated gene sets:reactome downregulation of erbb2 erbb3 signaling	11	0.29	0.314	0.17757
Curated gene sets:kegg adherens junction	70	0.115	0.124	0.17764
Curated gene sets:kegg neuroactive ligand receptor interaction	253	0.0643	0.0695	0.17769
GO bp:go regulation of defense response to virus by virus	28	0.166	0.18	0.1777
GO bp:go c21 steroid hormone biosynthetic process	15	0.228	0.246	0.17777
GO bp:go g protein coupled glutamate receptor signaling pathway	13	0.259	0.281	0.17782
Curated gene sets:reactome g1 s transition	104	0.0857	0.0929	0.17793
GO bp:go regulation of protein import into nucleus translocation	21	0.219	0.237	0.17794
GO bp:go membrane organization	850	0.0321	0.0348	0.17798
Curated gene sets:pid erbb1 downstream pathway	104	0.0897	0.0972	0.17803
Curated gene sets:biocarta biopeptides pathway	41	0.153	0.165	0.17815
GO bp:go histone phosphorylation	25	0.185	0.2	0.17821
Curated gene sets:im srebf1a targets	5	0.513	0.557	0.17822
GO bp:go response to methylmercury	12	0.245	0.266	0.17823
Curated gene sets:durchdewald skin carcinogenesis up	80	0.102	0.111	0.17825
GO bp:go apical junction assembly	39	0.142	0.154	0.17828
GO bp:go erythrocyte homeostasis	70	0.116	0.126	0.1783
Curated gene sets:provenzani metastasis dn	132	0.0815	0.0884	0.17835
Curated gene sets:stark hyppocampus 22q11 deletion dn	20	0.305	0.331	0.1784
GO bp:go leukocyte apoptotic process	23	0.183	0.199	0.17844
GO cc:go lamellipodium membrane	20	0.214	0.232	0.17862
Curated gene sets:amit egf response 480 hela	164	0.0734	0.0797	0.17865
GO bp:go regulation of cellular response to insulin stimulus	59	0.118	0.129	0.17877
Curated gene sets:rankin angiogenic targets of vhl hif2a dn	8	0.317	0.344	0.1788
Curated gene sets:burton adipogenesis 6	188	0.0676	0.0735	0.17894
GO mf:go carbon sulfur lyase activity	10	0.267	0.291	0.17915
Curated gene sets:acosta proliferation independent myc targets up	81	0.101	0.11	0.17921
Curated gene sets:smirnov response to ir 2hr dn	55	0.127	0.138	0.17923
Curated gene sets:biocarta eif pathway	14	0.245	0.267	0.17936
Curated gene sets:mikkelsen npc icp with h3k4me3	410	0.0461	0.0503	0.17956
GO bp:go negative regulation of protein serine threonine kinase activity	123	0.0841	0.0918	0.17993
Curated gene sets:wang tumor invasiveness up	367	0.0488	0.0533	0.17998
Curated gene sets:berenjeno transformed by rhoa forever dn	30	0.162	0.177	0.18015
GO bp:go positive regulation of catecholamine secretion	14	0.254	0.278	0.18021
GO bp:go reactive oxygen species metabolic process	91	0.1	0.11	0.18022
GO cc:go nuclear cyclin dependent protein kinase holoenzyme complex	15	0.292	0.319	0.18031
GO bp:go establishment of localization in cell	1605	0.0238	0.0261	0.18057
Curated gene sets:nakamura adipogenesis late dn	37	0.166	0.182	0.1806
GO bp:go regulation of cell morphogenesis	530	0.0412	0.0451	0.18063
GO mf:go histone deacetylase activity h3 k14 specific	10	0.276	0.303	0.1807
Curated gene sets:molenaar targets of ccnd1 and cdk4 dn	54	0.132	0.145	0.18072
GO mf:go tubulin binding	254	0.0579	0.0634	0.18085
Curated gene sets:provenzani metastasis up	184	0.0685	0.0751	0.18087
GO mf:go poly pyrimidine tract binding	16	0.216	0.237	0.1809
GO bp:go nad biosynthetic process	15	0.253	0.278	0.18093
Curated gene sets:chesler brain d6mit150 qtl cis	4	0.458	0.502	0.18101
Curated gene sets:holleman prednisolone resistance all dn	11	0.288	0.316	0.18101
Curated gene sets:oswald hematopoietic stem cell in collagen gel dn	257	0.0563	0.0618	0.18106
GO bp:go regulation of syncytium formation by plasma membrane fusion	25	0.194	0.213	0.18114
Curated gene sets:biocarta at1r pathway	32	0.17	0.187	0.18133
GO bp:go regulation of microtubule polymerization	31	0.162	0.178	0.18136
Curated gene sets:croonquist stromal stimulation dn	12	0.288	0.317	0.18172
Curated gene sets:myllykangas amplification hot spot 16	9	0.291	0.32	0.18215
GO bp:go negative regulation of potassium ion transport	31	0.181	0.199	0.18216
Curated gene sets:mikkelsen mef hcp with h3k27me3	584	0.0401	0.0442	0.18232
GO bp:go regulation of cell substrate adhesion	167	0.0728	0.0803	0.18234
GO bp:go positive regulation of intracellular steroid hormone receptor signaling pathway	14	0.246	0.271	0.18235
Curated gene sets:smid breast cancer luminal b up	166	0.0731	0.0807	0.18247
GO mf:go phosphatase inhibitor activity	35	0.14	0.154	0.18257
Curated gene sets:calvet irinotecan sensitive vs resistant dn	5	0.396	0.438	0.18267
Curated gene sets:lui thyroid cancer pax8 pparg up	44	0.14	0.154	0.18271
GO bp:go negative regulation of telomere maintenance via telomere lengthening	16	0.228	0.252	0.18272
GO bp:go cerebral cortex development	100	0.0905	0.1	0.18282
GO bp:go response to alcohol	353	0.0493	0.0545	0.18283
Curated gene sets:bacolod resistance to alkylating agents dn	54	0.127	0.14	0.18289
Curated gene sets:pid fak pathway	57	0.115	0.127	0.18297
GO mf:go oxidoreductase activity acting on peroxide as acceptor	40	0.143	0.158	0.18299
Curated gene sets:ly aging old dn	56	0.114	0.126	0.18306
GO cc:go er to golgi transport vesicle membrane	51	0.135	0.149	0.18317
GO bp:go nuclear envelope reassembly	16	0.209	0.232	0.18323
GO bp:go negative regulation of lymphocyte mediated immunity	34	0.172	0.191	0.18324
GO bp:go positive regulation of exocytosis	78	0.103	0.114	0.18329
GO mf:go phospholipase c activity	30	0.171	0.19	0.1833
Curated gene sets:krieg hypoxia not via kdm3a	703	0.035	0.0387	0.18342
Curated gene sets:reactome the role of nef in hiv1 replication and disease pathogenesis	26	0.169	0.187	0.18351
Curated gene sets:reactome platelet sensitization by ldl	14	0.265	0.294	0.1836
Curated gene sets:kokkinakis methionine deprivation 96hr dn	71	0.107	0.119	0.18371
GO bp:go positive regulation of phagocytosis	46	0.132	0.146	0.18371
GO bp:go protein complex subunit organization	1453	0.0252	0.0279	0.18389
Curated gene sets:gross hypoxia via hif1a only	8	0.333	0.37	0.18393
Curated gene sets:barrier cancer relapse tumor sample dn	12	0.296	0.329	0.18394
GO cc:go heterochromatin	61	0.111	0.123	0.18394
GO bp:go glycoprotein catabolic process	15	0.247	0.275	0.18403
Curated gene sets:reactome microrna mirna biogenesis	22	0.234	0.26	0.18433
GO bp:go negative regulation of endocytosis	38	0.135	0.15	0.18439
GO bp:go microtubule bundle formation	67	0.105	0.117	0.18439
GO bp:go maintenance of location in cell	91	0.0908	0.101	0.18461
GO mf:go beta catenin binding	77	0.101	0.112	0.18461
GO bp:go regulation of hormone secretion	251	0.0601	0.0669	0.18466
GO cc:go cell cell contact zone	62	0.116	0.129	0.18475
[truncated: 8,893 more rows]
