# Supplementary material for: Study of 300,486 individuals identifies 148 independent genetic loci influencing general cognitive function
Source: Nat Commun. 2018 May 29;9:2098. doi: 10.1038/s41467-018-04362-x (PMC5974083; doi:10.1038/s41467-018-04362-x)
Supplement: Supplementary file 18 — Supplementary Data 15 [file 41467_2018_4362_MOESM18_ESM.xlsx]

## Sheet: Sheet1
Supplementary Data 15. MAGMA gene-property analysis for reaction time. 53 specific tissue types were created using gene expression data based on GTEx RNA-seq data. Tissue groupings that withstood Bonferroni are highlighted in bold.
Tissue group	Number of genes	Beta	SE	P
Brain Cerebellar Hemisphere	16803	0.063	0.00821	8.6423e-15
Brain Frontal Cortex BA9	16803	0.0715	0.00934	1.0704e-14
Brain Cortex	16803	0.071	0.00962	7.908e-14
Brain Cerebellum	16803	0.0626	0.00853	1.1959e-13
Brain Anterior cingulate cortex BA24	16803	0.0664	0.00992	1.1215e-11
Brain Nucleus accumbens basal ganglia	16803	0.0556	0.0104	5.1044e-08
Brain Hippocampus	16803	0.0558	0.0111	2.3848e-07
Brain Caudate basal ganglia	16803	0.0537	0.011	4.9453e-07
Brain Hypothalamus	16803	0.0544	0.0112	5.9723e-07
Brain Amygdala	16803	0.0526	0.011	9.1992e-07
Brain Putamen basal ganglia	16803	0.0515	0.011	1.591e-06
Brain Substantia nigra	16803	0.0353	0.0123	0.0020178
Brain Spinal cord cervical c1	16803	0.0251	0.0121	0.01948
Pituitary	16803	0.0187	0.0125	0.06834
Testis	16803	0.00457	0.00731	0.26584
Ovary	16803	0.00733	0.0141	0.3012
Cells EBV transformed lymphocytes	16803	0.00182	0.00683	0.39508
Nerve Tibial	16803	-0.0103	0.0162	0.73868
Whole Blood	16803	-0.0051	0.00763	0.74805
Uterus	16803	-0.0123	0.0172	0.76385
Colon Sigmoid	16803	-0.0139	0.0189	0.76941
Muscle Skeletal	16803	-0.0129	0.00942	0.91417
Skin Sun Exposed Lower leg	16803	-0.0156	0.011	0.92226
Skin Not Sun Exposed Suprapubic	16803	-0.0167	0.0111	0.9343
Cells Transformed fibroblasts	16803	-0.0181	0.0103	0.95994
Esophagus Muscularis	16803	-0.0332	0.0189	0.96055
Thyroid	16803	-0.0281	0.015	0.96904
Esophagus Gastroesophageal Junction	16803	-0.0373	0.0199	0.9693
Spleen	16803	-0.0201	0.01	0.97755
Adrenal Gland	16803	-0.0316	0.0142	0.98678
Artery Tibial	16803	-0.0341	0.015	0.98829
Heart Left Ventricle	16803	-0.0295	0.0123	0.99195
Colon Transverse	16803	-0.0404	0.0159	0.99437
Cervix Endocervix	16803	-0.0485	0.0188	0.99508
Cervix Ectocervix	16803	-0.0542	0.021	0.99516
Stomach	16803	-0.0475	0.0182	0.99555
Prostate	16803	-0.0489	0.0186	0.99581
Esophagus Mucosa	16803	-0.028	0.0106	0.99595
Bladder	16803	-0.0513	0.0188	0.99684
Heart Atrial Appendage	16803	-0.0376	0.0135	0.99726
Small Intestine Terminal Ileum	16803	-0.0342	0.0121	0.99763
Fallopian Tube	16803	-0.0565	0.0193	0.99825
Vagina	16803	-0.0528	0.0174	0.99879
Artery Aorta	16803	-0.0521	0.0154	0.99965
Liver	16803	-0.03	0.0086	0.99976
Artery Coronary	16803	-0.0706	0.0184	0.99994
Adipose Subcutaneous	16803	-0.0634	0.0162	0.99995
Kidney Cortex	16803	-0.0567	0.0137	0.99998
Lung	16803	-0.0569	0.0138	0.99998
Pancreas	16803	-0.0506	0.0122	0.99998
Adipose Visceral Omentum	16803	-0.0768	0.0169	1
Breast Mammary Tissue	16803	-0.1	0.0203	1
Minor Salivary Gland	16803	-0.0628	0.0142	1
