# Supplementary material for: Study of 300,486 individuals identifies 148 independent genetic loci influencing general cognitive function
Source: Nat Commun. 2018 May 29;9:2098. doi: 10.1038/s41467-018-04362-x (PMC5974083; doi:10.1038/s41467-018-04362-x)
Supplement: Supplementary file 19 — Supplementary Data 16 [file 41467_2018_4362_MOESM19_ESM.xlsx]

## Sheet: Sheet1
Supplementary Data 16. Overlapping genome-wide significant SNP associations between general cognitive function and reaction time. Lead SNPs from the general cognitive function GWAS are in bold. GCF, general cognitive function; RT, reaction time.
SNP	CHR	BP	Allele 1 GCF	Allele 2 GCF	Z GCF	P GCF	RT Effect	SE RT	P RT
rs9384679	6	108864419	T	C	-7.629	2.36e-14	0.011	0.00176	3.92e-10
rs2802288	6	108896215	A	G	-7.508	6.02e-14	0.01105	0.00176	3.75e-10
rs1575676	6	108861264	T	C	-7.493	6.75e-14	0.01118	0.00176	1.99e-10
rs768023	6	108876002	A	G	7.485	7.15e-14	-0.01081	0.00177	9.77e-10
rs6911407	6	108867031	A	C	-7.467	8.23e-14	0.01089	0.00176	5.8e-10
rs2490272	6	108895386	T	C	7.456	8.9e-14	-0.01106	0.00177	3.85e-10
rs2802290	6	108905680	A	G	7.421	1.16e-13	-0.01103	0.00176	4.04e-10
rs2764261	6	108927842	A	G	-7.419	1.18e-13	0.01122	0.00177	2.31e-10
rs2802292	6	108908518	T	G	7.414	1.23e-13	-0.01101	0.00176	4.32e-10
rs2802295	6	108926496	A	G	-7.393	1.44e-13	0.01111	0.00176	3.02e-10
rs2253310	6	108888593	C	G	-7.388	1.49e-13	0.01104	0.00176	3.88e-10
rs2764265	6	108894438	T	C	7.372	1.68e-13	-0.01108	0.00177	3.79e-10
rs16822665	2	162901327	T	C	7.046	1.84e-12	-0.01021	0.00175	4.94e-09
rs2284872	2	162887969	A	G	7.019	2.24e-12	-0.00989	0.00175	1.51e-08
rs12692646	2	162877028	A	T	7.013	2.33e-12	-0.00997	0.00174	1.1e-08
rs10166311	2	162867613	A	G	7.01	2.39e-12	-0.00998	0.00175	1.1e-08
rs10166124	2	162867622	T	C	7.003	2.51e-12	-0.00996	0.00175	1.17e-08
rs10930040	2	162894766	A	G	-6.986	2.82e-12	0.00967	0.00175	3.05e-08
rs2268889	2	162885110	T	C	6.986	2.84e-12	-0.00971	0.00175	2.8e-08
rs2300757	2	162874170	C	G	6.985	2.85e-12	-0.00999	0.00175	1.07e-08
rs2302873	2	162879452	T	C	-6.965	3.29e-12	0.01001	0.00175	9.83e-09
rs4140685	2	162852079	T	G	6.942	3.86e-12	-0.01003	0.00175	9.48e-09
rs12617656	2	162851147	T	C	-6.926	4.33e-12	0.00994	0.00175	1.27e-08
rs7608798	2	162890217	A	G	6.919	4.54e-12	-0.00977	0.00175	2.27e-08
rs2160927	2	162891075	T	C	6.917	4.62e-12	-0.00976	0.00175	2.26e-08
rs7565794	2	162859000	T	C	-6.907	4.97e-12	0.00995	0.00175	1.22e-08
rs6432707	2	162863959	A	T	-6.893	5.47e-12	0.00991	0.00175	1.42e-08
rs2111850	2	162891279	T	C	-6.892	5.51e-12	0.0099	0.00175	1.61e-08
rs12995636	2	162908664	A	G	-6.694	2.17e-11	0.01016	0.00174	5.81e-09
rs10875914	12	49422094	A	G	-6.59	4.39e-11	-0.00974	0.00175	2.49e-08
rs2764264	6	108934461	T	C	6.579	4.73e-11	-0.01124	0.00179	3.34e-10
rs13421039	2	162803883	T	C	6.428	1.29e-10	-0.00981	0.00175	1.97e-08
rs1913808	2	162804678	A	G	6.429	1.29e-10	-0.00985	0.00175	1.75e-08
rs1054442	12	49389320	A	C	-6.412	1.43e-10	-0.01231	0.00176	2.44e-12
rs10221808	2	162813807	A	G	-6.389	1.68e-10	0.00972	0.00174	2.45e-08
rs6432706	2	162797621	T	C	6.356	2.07e-10	-0.00986	0.00175	1.62e-08
rs13430823	2	162802795	T	C	-6.337	2.34e-10	0.00983	0.00175	1.88e-08
rs2022464	6	108945370	A	C	-6.333	2.4e-10	0.01153	0.00178	9.33e-11
rs10457180	6	108965039	A	G	6.325	2.53e-10	-0.01158	0.00179	1.12e-10
rs2117029	12	49408440	A	T	-6.309	2.82e-10	-0.00971	0.00175	2.77e-08
rs10783299	12	49390677	T	C	-6.303	2.91e-10	-0.00976	0.00175	2.35e-08
rs1138908	12	49402299	C	G	6.275	3.49e-10	0.00967	0.00175	3.17e-08
rs8065165	17	43970317	T	C	6.265	3.73e-10	-0.01014	0.00172	3.58e-09
rs2241726	12	49444545	A	G	6.263	3.78e-10	0.00971	0.00174	2.54e-08
rs4946932	6	108974746	A	C	-6.259	3.88e-10	0.0116	0.00179	8.26e-11
rs10783300	12	49407908	T	C	6.241	4.36e-10	0.00963	0.00175	3.45e-08
rs2293445	12	49398862	A	G	6.225	4.81e-10	0.00951	0.00174	4.69e-08
rs13217795	6	108974098	T	C	6.217	5.08e-10	-0.01157	0.00178	8.53e-11
rs10783301	12	49439376	A	G	-6.205	5.47e-10	-0.00972	0.00175	2.54e-08
rs10875908	12	49400505	A	C	-6.198	5.73e-10	-0.00965	0.00175	3.23e-08
rs9400239	6	108977663	T	C	-6.194	5.86e-10	0.01168	0.00179	6.17e-11
rs2316775	17	43953502	A	G	-6.162	7.16e-10	0.01013	0.00172	3.87e-09
rs2293446	12	49412709	A	G	6.14	8.23e-10	0.00953	0.00174	4.6e-08
rs11168839	12	49457635	A	G	6.138	8.35e-10	0.01004	0.00174	8.64e-09
rs6731420	2	71533300	T	C	-6.131	8.76e-10	0.00962	0.00175	4.15e-08
rs4314015	2	71528309	T	G	6.13	8.8e-10	-0.00964	0.00175	3.93e-08
rs10875913	12	49419308	T	C	-6.124	9.13e-10	-0.00961	0.00175	3.66e-08
rs2284870	2	162888727	T	C	-6.124	9.13e-10	0.00965	0.00176	4.09e-08
rs3782357	12	49427652	T	C	6.124	9.15e-10	0.00996	0.00175	1.21e-08
rs10875915	12	49430094	T	C	6.106	1.02e-09	0.00986	0.00174	1.52e-08
rs1014444	2	162868858	A	G	-6.096	1.09e-09	0.00982	0.00176	2.28e-08
rs7590738	2	71525698	A	G	6.079	1.21e-09	-0.00962	0.00175	4.21e-08
rs4852778	2	71544954	A	G	6.064	1.32e-09	-0.00965	0.00175	3.75e-08
rs2287326	2	71559107	T	G	-6.05	1.45e-09	0.00968	0.00176	3.92e-08
rs2471738	17	44076063	T	C	6.034	1.6e-09	-0.01346	0.00173	6.12e-15
rs11079727	17	43976813	A	C	6.032	1.62e-09	-0.01028	0.00172	2.32e-09
rs10459232	12	49467076	A	C	-5.94	2.85e-09	-0.0113	0.00174	8.97e-11
rs4438512	2	71645946	A	G	5.928	3.08e-09	-0.00957	0.00176	4.97e-08
rs11168850	12	49472965	A	G	5.925	3.12e-09	0.0113	0.00174	8.83e-11
rs2419079	2	71646017	A	T	5.923	3.16e-09	-0.00957	0.00175	4.78e-08
rs9398173	6	109000316	T	C	-5.923	3.16e-09	0.01215	0.00179	1.16e-11
rs4852783	2	71645828	A	G	5.919	3.23e-09	-0.00957	0.00176	4.98e-08
rs7969091	12	49464449	A	G	-5.915	3.33e-09	-0.01116	0.00174	1.62e-10
rs3732233	2	71633275	T	C	-5.912	3.38e-09	0.00961	0.00176	4.49e-08
rs421211	5	139581773	A	G	5.897	3.71e-09	0.00993	0.00175	1.32e-08
rs4852256	2	71631345	A	T	-5.896	3.72e-09	0.00965	0.00175	3.76e-08
rs4463213	5	139545748	A	G	5.887	3.93e-09	0.00983	0.00175	1.93e-08
rs3785878	17	43974147	T	C	5.886	3.96e-09	-0.0098	0.00174	1.91e-08
rs1536057	6	108885623	T	C	-5.866	4.46e-09	0.0102	0.00174	4.81e-09
rs9398171	6	108983527	T	C	5.864	4.51e-09	-0.01183	0.00179	3.84e-11
rs7726176	5	139547971	A	T	5.864	4.52e-09	0.00986	0.00175	1.71e-08
rs12206094	6	108906200	T	C	-5.835	5.37e-09	0.01023	0.00174	4.34e-09
rs6714975	2	71633389	T	C	5.834	5.41e-09	-0.00961	0.00175	4.29e-08
rs3800228	6	108996748	T	G	-5.815	6.07e-09	0.01228	0.0018	7.93e-12
rs10459221	12	49466994	C	G	-5.813	6.14e-09	-0.01113	0.00174	1.75e-10
rs10875917	12	49467330	T	G	5.804	6.47e-09	0.01113	0.00174	1.78e-10
rs1142828	5	139623901	T	G	-5.8	6.62e-09	-0.01002	0.00175	9.77e-09
rs4946935	6	109000742	A	G	-5.8	6.65e-09	0.01229	0.00179	7.69e-12
rs7300136	12	49477334	T	C	-5.798	6.69e-09	-0.01141	0.00174	6.14e-11
rs11748023	5	139558584	T	C	5.795	6.83e-09	0.00986	0.00175	1.69e-08
rs397463	5	139584275	C	G	-5.795	6.85e-09	-0.0099	0.00175	1.49e-08
rs10875918	12	49476629	A	G	5.793	6.93e-09	0.0114	0.00174	6.24e-11
rs3800227	6	108994161	A	G	-5.787	7.18e-09	0.0112	0.0018	4.37e-10
rs35396874	6	108994433	T	C	5.779	7.51e-09	-0.01209	0.0018	1.73e-11
rs6580698	12	49478658	T	C	-5.773	7.79e-09	-0.01154	0.00175	3.78e-11
rs1864970	5	139633042	T	C	5.76	8.4e-09	0.01004	0.00175	9e-09
rs2436391	5	139557385	T	C	5.757	8.54e-09	0.00994	0.00175	1.31e-08
rs11750229	5	139559014	T	G	-5.755	8.66e-09	-0.00995	0.00175	1.26e-08
rs9686454	5	139627813	T	C	5.754	8.73e-09	0.01002	0.00175	9.73e-09
rs2436390	5	139586501	A	G	5.75	8.95e-09	0.00994	0.00175	1.3e-08
rs62385161	5	139635747	T	C	5.749	8.99e-09	0.0101	0.00175	7.46e-09
rs13177454	5	139636570	T	C	5.748	9.02e-09	0.01002	0.00175	9.93e-09
rs2153960	6	108988184	A	G	5.747	9.1e-09	-0.01217	0.0018	1.26e-11
rs4913077	5	139614795	T	C	5.746	9.12e-09	0.01	0.00175	1.04e-08
rs11745502	5	139558808	A	G	5.744	9.24e-09	0.00994	0.00175	1.28e-08
rs6863474	5	139630862	T	C	-5.744	9.25e-09	-0.01003	0.00175	9.45e-09
rs10060071	5	139599097	T	C	5.742	9.33e-09	0.00998	0.00175	1.1e-08
rs1935952	6	108998905	C	G	5.741	9.4e-09	-0.01214	0.0018	1.4e-11
rs7730245	5	139628163	A	C	-5.739	9.54e-09	-0.01003	0.00175	9.54e-09
rs12188849	5	139621570	A	G	-5.738	9.59e-09	-0.01002	0.00175	9.69e-09
rs13353827	5	139654537	T	C	5.735	9.75e-09	0.01006	0.00175	8.56e-09
rs1935949	6	108999287	A	G	-5.734	9.81e-09	0.01216	0.00179	1.26e-11
rs7737543	5	139646026	A	G	5.731	9.98e-09	0.01005	0.00175	8.84e-09
rs4945816	6	109002042	T	C	5.73	1e-08	-0.01216	0.0018	1.29e-11
rs12717951	5	139589309	A	G	5.729	1.01e-08	0.00995	0.00175	1.26e-08
rs3800229	6	108996963	T	G	5.727	1.02e-08	-0.01215	0.00179	1.32e-11
rs9398172	6	108994826	A	G	5.725	1.03e-08	-0.01213	0.00179	1.38e-11
rs35214989	5	139636127	T	C	5.722	1.05e-08	0.01	0.00175	1.07e-08
rs13359519	5	139654664	A	G	-5.722	1.06e-08	-0.01007	0.00175	8.41e-09
rs9400240	6	108997611	A	G	5.72	1.06e-08	-0.01214	0.00179	1.35e-11
rs13186198	5	139652057	A	G	-5.719	1.07e-08	-0.01015	0.00175	6.37e-09
rs6580699	12	49478812	T	G	-5.716	1.09e-08	-0.01146	0.00174	5.06e-11
rs1935951	6	108999101	A	G	5.715	1.1e-08	-0.01215	0.00179	1.28e-11
rs6867870	5	139641896	A	C	-5.714	1.11e-08	-0.01005	0.00175	8.88e-09
rs2053056	5	139648183	A	C	5.712	1.12e-08	0.01007	0.00175	8.37e-09
rs3800231	6	108998266	A	G	-5.712	1.12e-08	0.01215	0.00179	1.29e-11
rs6879174	5	139654732	A	G	5.712	1.12e-08	0.01006	0.00175	8.59e-09
rs13177186	5	139640476	A	G	5.71	1.13e-08	0.01004	0.00175	9.19e-09
rs9374040	6	108997435	A	G	5.706	1.15e-08	-0.01214	0.00179	1.36e-11
rs2337081	5	139642414	A	C	5.706	1.16e-08	0.01004	0.00175	9.18e-09
rs7732649	5	139623592	A	C	-5.704	1.17e-08	-0.00994	0.00175	1.36e-08
rs2053055	5	139646776	T	C	-5.703	1.18e-08	-0.01007	0.00175	8.41e-09
rs6889283	5	139653439	T	G	-5.698	1.21e-08	-0.01007	0.00175	8.3e-09
rs2116790	5	139654115	A	G	-5.697	1.22e-08	-0.01014	0.00175	6.5e-09
rs6580473	5	139646962	A	G	5.697	1.22e-08	0.01011	0.00175	7.14e-09
rs2337082	5	139649201	A	G	-5.69	1.27e-08	-0.01015	0.00175	6.42e-09
rs7296288	12	49479968	A	C	-5.685	1.31e-08	-0.01028	0.00174	3.7e-09
rs7717576	5	139623591	A	G	-5.682	1.33e-08	-0.00994	0.00175	1.35e-08
rs1062034	6	109005588	A	G	5.67	1.43e-08	-0.01208	0.0018	1.75e-11
rs11168018	5	139700608	A	T	5.64	1.7e-08	0.00974	0.00174	2.37e-08
rs6580516	5	139698143	T	G	5.618	1.93e-08	0.00984	0.00174	1.65e-08
rs6896007	5	139654951	A	G	-5.618	1.94e-08	-0.01004	0.00175	9.13e-09
rs4946936	6	109003321	T	C	-5.582	2.38e-08	0.01224	0.0018	9.71e-12
rs10061835	5	139700578	T	C	-5.545	2.94e-08	-0.00997	0.00174	1.11e-08
rs6580515	5	139698110	A	C	-5.545	2.94e-08	-0.00993	0.00174	1.25e-08
rs6873248	5	139683762	A	G	-5.545	2.95e-08	-0.01034	0.00175	3.18e-09
rs12713315	2	56458509	T	C	-5.524	3.31e-08	0.01034	0.00173	2.44e-09
rs1529693	5	139678213	A	G	5.511	3.57e-08	0.01039	0.00175	2.75e-09
rs10911301	1	183282575	A	G	-5.509	3.62e-08	0.01049	0.00174	1.83e-09
rs9400241	6	109003989	A	C	5.497	3.87e-08	-0.01227	0.0018	8.39e-12
rs4912710	5	139694938	A	G	-5.486	4.12e-08	-0.00981	0.00175	1.91e-08
rs4912709	5	139684087	T	C	-5.485	4.15e-08	-0.01036	0.00175	2.98e-09
rs10051345	5	139670932	C	G	-5.482	4.2e-08	-0.01042	0.00175	2.44e-09
rs13188413	5	139666287	A	T	-5.477	4.33e-08	-0.01036	0.00175	2.96e-09
rs13170475	5	139671062	T	C	-5.472	4.46e-08	-0.01034	0.00175	3.18e-09
rs3777095	5	139660916	A	G	-5.465	4.62e-08	-0.0103	0.00175	3.72e-09
rs6893253	5	139661279	T	C	5.463	4.69e-08	0.0103	0.00175	3.62e-09
rs7715538	5	139665181	T	C	5.463	4.69e-08	0.01037	0.00175	2.88e-09
rs4913079	5	139683029	A	G	5.459	4.78e-08	0.01036	0.00175	3.01e-09
rs10911302	1	183283969	A	G	5.452	4.98e-08	-0.01047	0.00175	1.96e-09
