# Supplementary material for: Study of 300,486 individuals identifies 148 independent genetic loci influencing general cognitive function
Source: Nat Commun. 2018 May 29;9:2098. doi: 10.1038/s41467-018-04362-x (PMC5974083; doi:10.1038/s41467-018-04362-x)
Supplement: Supplementary file 20 — Supplementary Data 17 [file 41467_2018_4362_MOESM20_ESM.xlsx]

## Sheet: Sheet1
Supplementary Data 17. Over lapping significant gene-based associations between general cognitive function and reaction time. GCF, general cognitive function; RT, reaction time. Novel gene-based associations for general cognitive function are presented in bold.
Gene	P GCF	P RT	GeneCards Summary
RNF123	7.03e-32	2.01e-06	RNF123 (Ring Finger Protein 123) is a Protein Coding gene. Among its related pathways are Deubiquitination and Class I MHC mediated antigen processing and presentation. GO annotations related to this gene include ligase activity. An important paralog of this gene is RSPRY1.
DCC	1.23e-24	1.68e-09	DCC (DCC Netrin 1 Receptor) is a Protein Coding gene. Diseases associated with DCC include Mirror Movements 1 And/Or Agenesis Of The Corpus Callosum and Gaze Palsy, Familial Horizontal, With Progressive Scoliosis, 2. Among its related pathways are Netrin-1 signaling and Netrin Signaling. GO annotations related to this gene include identical protein binding and transmembrane signaling receptor act…
FOXP1	9.85e-17	6.75e-09	FOXP1 (Forkhead Box P1) is a Protein Coding gene. Diseases associated with FOXP1 include Mental Retardation With Language Impairment And With Or Without Autistic Features and Lymphoma, Malt, Somatic. Among its related pathways are Transcriptional regulation of pluripotent stem cells and MicroRNAs in cancer. GO annotations related to this gene include transcription factor activity, sequence-specif…
STAU1	2.15e-16	3.41e-08	STAU1 (Staufen Double-Stranded RNA Binding Protein 1) is a Protein Coding gene. GO annotations related to this gene include poly(A) RNA binding and double-stranded RNA binding. An important paralog of this gene is STAU2.
ARFGEF2	3.67e-16	8.81e-08	ARFGEF2 (ADP Ribosylation Factor Guanine Nucleotide Exchange Factor 2) is a Protein Coding gene. Diseases associated with ARFGEF2 include Periventricular Heterotopia With Microcephaly and Heterotopia, Periventricular. Among its related pathways are Chaperonin-mediated protein folding and Endocytosis. GO annotations related to this gene include bindingand myosin binding. An important paralog of th…
CSE1L	6.3e-16	6.54e-11	CSE1L (Chromosome Segregation 1 Like) is a Protein Coding gene. Diseases associated with CSE1L include Colorectal Cancer. Among its related pathways are p53 pathway (Pathway Interaction Database) and Direct p53 effectors. GO annotations related to this gene include binding
PRKAG1	3.24e-14	1.87e-13	PRKAG1 (Protein Kinase AMP-Activated Non-Catalytic Subunit Gamma 1) is a Protein Coding gene. Among its related pathways are Regulation of CFTR activity (norm and CF) and Longevity regulating pathway. GO annotations related to this gene include protein kinase activity and ADP binding. An important paralog of this gene is PRKAG2.
DDN	8.56e-14	7.68e-13	DDN (Dendrin) is a Protein Coding gene. GO annotations related to this gene include RNA polymerase II core promoter proximal region sequence-specific DNA binding and transcription factor activity, RNA polymerase II core promoter proximal region sequence-specific binding
NMNAT2	2.75e-13	8.22e-12	NMNAT2 (Nicotinamide Nucleotide Adenylyltransferase 2) is a Protein Coding gene. Diseases associated with NMNAT2 include Wallerian Degeneration. Among its related pathways are Metabolism and NAD metabolism. GO annotations related to this gene include nicotinate-nucleotide adenylyltransferase activity and nicotinamide-nucleotide adenylyltransferase activity. An important paralog of this gene is NM…
KMT2D	8.2e-13	3.45e-11	KMT2D (Lysine Methyltransferase 2D) is a Protein Coding gene. Diseases associated with KMT2D include Kabuki Syndrome 1 and Kmt2d-Related Kabuki Syndrome. Among its related pathways are Activated PKN1 stimulates transcription of AR (androgen receptor) regulated genes KLK2 and KLK3 and Chromatin organization. GO annotations related to this gene include transcription regulatory region DNA binding an…
ZNF638	8.48e-13	9.9e-11	ZNF638 (Zinc Finger Protein 638) is a Protein Coding gene. Diseases associated with ZNF638 include Cutaneous T Cell Lymphoma. Among its related pathways are Regulation of lipid metabolism by Peroxisome proliferator-activated receptor alpha (PPARalpha) and Developmental Biology. GO annotations related to this gene include nucleic acid binding and RNA binding.
RECQL4	1.79e-12	1.73e-06	RECQL4 (RecQ Like Helicase 4) is a Protein Coding gene. Diseases associated with RECQL4 include Baller-Gerold Syndrome and Rapadilino Syndrome. Among its related pathways are DNA Damage. GO annotations related to this gene include nucleic acid binding and annealing helicase activity. An important paralog of this gene is BLM.
FOXO3	2.52e-12	2.66e-11	FOXO3 (Forkhead Box O3) is a Protein Coding gene. Diseases associated with FOXO3 include Rhabdomyosarcoma and Cervix Carcinoma. Among its related pathways are IL-2 Pathwayand Longevity regulating pathway. GO annotations related to this gene include transcription factor activity, sequence-specific DNA binding and protein kinase binding. An important paralog of this gene is FOXO1
PFDN1	1.33e-11	1.03e-11	PFDN1 (Prefoldin Subunit 1) is a Protein Coding gene. Among its related pathways are Chaperonin-mediated protein folding and Cooperation of Prefoldin and TriC/CCT in actin and tubulin folding. GO annotations related to this gene include transcription factor activity, sequence-specific DNA binding and protein binding involved in protein folding.
DPP4	5.39e-11	9.49e-07	DPP4 (Dipeptidyl Peptidase 4) is a Protein Coding gene. Diseases associated with DPP4 include Nasopharyngitis and Endocrine Pancreas Disease. Among its related pathways are Collagen chain trimerization and Peptide hormone metabolism. GO annotations related to this gene include protein homodimerization activity and receptor binding. An important paralog of this gene is FAP.
CYSTM1	7e-11	2.32e-10	CYSTM1 (Cysteine Rich Transmembrane Module Containing 1) is a Protein Coding gene. Among its related pathways are Innate Immune System
RHEBL1	1.43e-10	4.77e-10	RHEBL1 (RHEB Like 1) is a Protein Coding gene. Diseases associated with RHEBL1 include Renal Clear Cell Carcinoma. Among its related pathways are AMP-activated Protein Kinase (AMPK) Signaling. GO annotations related to this gene include GTP binding and GTPase activity. An important paralog of this gene is RHEB.
SMG7	2.7e-10	3.14e-10	SMG7 (SMG7, Nonsense Mediated MRNA Decay Factor) is a Protein Coding gene. Among its related pathways are mRNA surveillance pathway and Gene Expression. GO annotations related to this gene include protein phosphatase 2A binding. An important paralog of this gene is SMG5.
LRRC4	4.53e-10	3.93e-08	LRRC4 (Leucine Rich Repeat Containing 4) is a Protein Coding gene. Diseases associated with LRRC4 include Nasopharyngitis and Nasopharyngeal Disease. Among its related pathways are Cell adhesion molecules (CAMs) and Axon guidance. An important paralog of this gene is LRRC4B.
EXT1	4.84e-10	1.57e-06	EXT1 (Exostosin Glycosyltransferase 1) is a Protein Coding gene. Diseases associated with EXT1 include Chondrosarcoma and Exostoses, Multiple, Type 1. Among its related pathways are Glycosaminoglycan metabolism and Metabolism. GO annotations related to this gene include protein homodimerization activity and transferase activity, transferring glycosyl groups. An important paralog of this gene is E…
SREBF1	4.38e-09	4.85e-09	SREBF1 (Sterol Regulatory Element Binding Transcription Factor 1) is a Protein Coding gene. Diseases associated with SREBF1 include Fatty Liver Disease and Smith-Magenis Syndrome. Among its related pathways are Metabolism and Insulin resistance. GO annotations related to this gene include transcription factor activity, sequence-specific DNA binding and chromatin binding. An important paralog of t…
DHH	2.91e-08	8.89e-10	DHH (Desert Hedgehog) is a Protein Coding gene. Diseases associated with DHH include 46Xy Partial Gonadal Dysgenesis, With Minifascicular Neuropathy and 46Xy Sex Reversal 7. Among its related pathways are Hedgehog Pathway and HIV Life Cycle. GO annotations related to this gene include calcium ion binding and patched binding. An important paralog of this gene is SHH.
MACROD1	4.07e-08	3.24e-08	MACROD1 (MACRO Domain Containing 1) is a Protein Coding gene. GO annotations related to this gene include hydrolase activity, acting on glycosyl bonds and deacetylase activity. An important paralog of this gene is MACROD2.
PCDH17	4.08e-08	5.94e-10	PCDH17 (Protocadherin 17) is a Protein Coding gene. GO annotations related to this gene include calcium ion binding. An important paralog of this gene is PCDH19.
ZMIZ2	6.39e-08	2.42e-07	ZMIZ2 (Zinc Finger MIZ-Type Containing 2) is a Protein Coding gene. Among its related pathways are Regulation of Androgen receptor activity. GO annotations related to this gene include ligand-dependent nuclear receptor transcription coactivator activity. An important paralog of this gene is ZMIZ1
ZKSCAN8	6.59e-08	2.76e-07	ZKSCAN8 (Zinc Finger With KRAB And SCAN Domains 8) is a Protein Coding gene. Among its related pathways are Gene Expression. GO annotations related to this gene include nucleic acid binding and transcription factor activity, sequence-specific DNA binding. An important paralog of this gene is ZNF397.
RABGAP1L	9.6e-08	2.07e-06	RABGAP1L (RAB GTPase Activating Protein 1 Like) is a Protein Coding gene. GO annotations related to this gene include GTPase activator activity and Rab GTPase binding. An important paralog of this gene is RABGAP1.
FLRT1	1.1e-07	9.75e-09	FLRT1 (Fibronectin Leucine Rich Transmembrane Protein 1) is a Protein Coding gene. Diseases associated with FLRT1 include Autosomal Recessive Spastic Paraplegia Type 68. Among its related pathways are Signaling by FGFR2 and Negative regulation of FGFR1 signaling. GO annotations related to this gene include protein binding, bridging and signal transducer activity, downstream of receptor. An import…
TYW5	1.25e-07	3.16e-07	TYW5 (TRNA-YW Synthesizing Protein 5) is a Protein Coding gene. Among its related pathways are tRNA processing and Gene Expression. GO annotations related to this gene include protein homodimerization activity and tRNA binding. An important paralog of this gene is HSPBAP1.
ZNF165	1.79e-07	2.85e-07	ZNF165 (Zinc Finger Protein 165) is a Protein Coding gene. Diseases associated with ZNF165 include Suppurative Thyroiditis. GO annotations related to this gene include transcription factor activity, sequence-specific DNA binding. An important paralog of this gene is ZNF397
CD46	2.12e-07	1.46e-06	CD46 (CD46 Molecule) is a Protein Coding gene. Diseases associated with CD46 include Hemolytic Uremic Syndrome, Atypical 2 and Measles. Among its related pathways are Immune response Lectin induced complement pathway and Complement Pathway. GO annotations related to this gene include receptor activity and enzyme inhibitor activity. An important paralog of this gene is APOH.
ZSCAN16	2.52e-07	9.65e-07	ZSCAN16 (Zinc Finger And SCAN Domain Containing 16) is a Protein Coding gene. GO annotations related to this gene include transcription factor activity, sequence-specific DNA binding. An important paralog of this gene is ZSCAN9.
C2orf69	2.67e-07	7.37e-07	C2orf69 (Chromosome 2 Open Reading Frame 69) is a Protein Coding gene.
CDH7	3.39e-07	1.42e-07	CDH7 (Cadherin 7) is a Protein Coding gene. Among its related pathways are Cell junction organization and G12-G13 in Cellular Signaling. GO annotations related to this gene include calcium ion binding. An important paralog of this gene is CDH10
EFNA5	3.56e-07	1.87e-08	EFNA5 (Ephrin A5) is a Protein Coding gene. Diseases associated with EFNA5 include 3-Methylglutaconic Aciduria, Type V and Artemis Deficiency. Among its related pathways are EPHA forward signaling and Ras signaling pathway. GO annotations related to this gene include ephrin receptor binding and chemorepellent activity. An important paralog of this gene is EFNA2.
C9orf64	3.66e-07	2.32e-09	C9orf64 (Chromosome 9 Open Reading Frame 64) is a Protein Coding gene.
C2orf47	3.94e-07	1.96e-06	MAIP1 (Matrix AAA Peptidase Interacting Protein 1) is a Protein Coding gene.
TOM1L2	6.14e-07	2.11e-06	TOM1L2 (Target Of Myb1 Like 2 Membrane Trafficking Protein) is a Protein Coding gene. Diseases associated with TOM1L2 include Smith-Magenis Syndrome. GO annotations related to this gene include protein kinase binding and clathrin binding. An important paralog of this gene is TOM1.
GPR52	1.4e-06	3.72e-07	GPR52 (G Protein-Coupled Receptor 52) is a Protein Coding gene. Among its related pathways are Peptide ligand-binding receptors. GO annotations related to this gene include G-protein coupled receptor activity and G-protein coupled amine receptor activity. An important paralog of this gene is GPR21.
