# Supplementary material for: Study of 300,486 individuals identifies 148 independent genetic loci influencing general cognitive function
Source: Nat Commun. 2018 May 29;9:2098. doi: 10.1038/s41467-018-04362-x (PMC5974083; doi:10.1038/s41467-018-04362-x)
Supplement: Supplementary file 21 — Supplementary Data 18 [file 41467_2018_4362_MOESM21_ESM.xlsx]

## Sheet: Sheet1
Supplementary Data 18. Cohort descriptive statistics: The total number of participants (% female) and mean, minimum and maximum age per cohort are indicated. The cohort N presented here is the number of individuals that contributed to the meta-analysis, and so these values may differ to the total cohort N stated in the cohort descriptions (Supplementary Note 2).
Cohort	N	% females	min age	max age	mean age	sd age	N excluded stroke	N excluded dementia	N excluded stroke & dementia
3CDIJON	3652	61.8291	65.16	95.02	74.21	5.37	246	0	0
ACPRC	1465	71.1945	43	86	64.67	6.09	0	0	0
AgeCoDe_Basel	358	64.5251	79	95	83.28	3.2	70	140	0
AgeCoDe_DietBB	180	72.1591	79	91	84.12	2.9	14	0	0
AGES	2856	58.0014	66	93	76.2	5.3	NA	NA	0
Airwave	9072	35.939	19	69.9	41.3	8.9	0	0	0
ADNI	242	47.5207	62	90	75.44	5.17	0	0	0
ARIC	8975	53.2591	47	69	57.18	5.67	275	0	0
ASPS	748	57.0856	46	84	64.87	7.84	0	0	0
ASPS-Fam	311	61.0932	38	84	63.93	10.57	0	0	0
ASPIS	897	0	18	25	20.74	1.86	0	0	0
BASE II	1279	53.5606	59.1	71.3	65.3	2.9	NA	NA	0
BATS	2253	53.3067	16	22.3	16.4	0.7	0	0	0
Betula	359	53.2033	25	80	62.28	13.35	0	0	0
CAMH	80	52.5	18	86	48.64	19.38	0	0	0
CHS	1517	62.3599	74	97	80.35	3.8	NA	NA	0
CROATIA_Korcula	1790	65.3367	18	90	54.9	15.6	7	0	0
DCC	1221	54.2998	18	91	28.28	14.66	0	0	0
DNS	419	52.7446	18	22	19.75	1.25	0	0	0
ELSA	6909	54.0165	31	99	62.46	9.37	0	0	0
EPOZ	378	55.8201	60.44	90.16	70.29	6.25	18	0	0
ERF	2566	56.3523	16.65	86.5	48.04	14.22	22	0	0
FHS	4349	53.9288	26	96	56.46	12.62	96	85	0
FinnTwin	1133	53.8394	21	30	23.49	2.115	0	0	0
DUBLIN	92	44.5652	18	60	36.25	12.84	0	0	0
Generation Scotland	18830	59.2	18	94	47.1	14.1	757	8	0
GENOA	775	59.7419	45	84	61.2	8.8	16	0	0
GENADA	782	64.3223	48	94	73.39	7.92	0	0	0
HARMONY	448	49.5536	65.19	95.66	77.84	6.99	58	163	40
HCS	1926	49.9481	55	86	66	7.4	71	0	0
HBCS	304	0	65	75	67.66	2.31	0	0	0
HRS	7396	58.5452	31	98	67.89	10.73	503	111	0
IBG	299	21.4047	12	19	15.92	1.49	0	0	0
LOAD	1029	63.1681	53	95	75.14	5.67	0	0	0
LBC1921	459	59.9129	78	81	79	0.6	46	5	0
LBC1936	934	49.6788	68	71	69.5	0.8	53	0	0
LOGOS	734	0	18	35	22.24	3.62	0	0	0
LIFE-Adult	2224	48.7784	20.2	82.3	65.7	10.2	68	0	0
LLFS	4081	54.3984	24	90	68.14	14.04	0	0	0
MCTFR	5446	56.9041	17	65	32.52	13.18	0	0	0
Munich	1095	72.4201	19	79	47.92	15.52	0	0	0
GCAP	962	54.7817	18	61	33.01	9.96	0	0	0
NCNG	625	67.84	18	77	48.07	17.87	0	0	0
OATS	437	62.8959	65	89	70.5	5.2	NA	NA	0
ORCADES	1554	62.677	18.11	87.56	54.32	14.49	0	0	0
PNC	4470	49.8658	8	21	13.83	3.63	0	0	0
PROSPER IE	1538	44.2424	69.4	83.3	75.3	3.28	205	0	0
PROSPER NL	739	36.8366	70.2	83.1	74.9	3.24	142	0	0
PROSPER SC	1803	40.2518	70.2	83.4	75.2	3.39	239	0	0
ROSMAP 1	1191	69.0176	55.42	102.15	77.49	7.51	262	66	0
ROSMAP 2	199	74.3719	59.95	96.45	79.23	7.11	156	65	0
RSI	1779	58.1225	65.08	94.97	74.1	5.58	178	340	0
RSII	1260	54.8413	57.99	97.92	66.9	6.37	100	93	0
RSIII	2579	57.3478	45.46	89.37	56.62	6.29	85	18	0
SATSA and GENDER	703	54.4808	50.67	93.55	70.84	7.97	29	13	1
Sydney MAS	727	57.0839	70.3	90.8	78.4	4.7	NA	NA	0
YFS	1725	54.7826	34	49	41.9	5	5	0	0
TOP	633	46.7615	15	55	32.37	9.61	0	0	0
UCLA	628	50.6369	21	50	31.1	8.3	0	0	0
Understanding Society	7999	56.1284	16	97	52.3	15.84	22	0	0
VETSA	862	0	51.08	66.92	56.77	3.32	28	0	0
ZHH	176	52.1505	8	78	34.44	19.18	0	0	0
UKBiobank Assessment Centre	107586	53.4289	40	70	57.19	7.99	0	0	0
UKBiobank T2	11123	51.28	44	73	61.53	7.21	0	0	0
UKBiobank MRI	3002	51.43	46	73	61.2	6.99	0	0	0
UKBiobank Web-Based	46322	55.45	45.5	78.7	62.81	7.64	0	0	0
Total N	300486
