# Supplementary material for: Study of 300,486 individuals identifies 148 independent genetic loci influencing general cognitive function
Source: Nat Commun. 2018 May 29;9:2098. doi: 10.1038/s41467-018-04362-x (PMC5974083; doi:10.1038/s41467-018-04362-x)
Supplement: Supplementary file 22 — Supplementary Data 19 [file 41467_2018_4362_MOESM22_ESM.xlsx]

## Sheet: Sheet1
Supplementary Data 19. Cohort specific details of genotyping platforms, quality control and imputation algorithms. PCA: Principal Component Analysis, MDS: Multidimensional Scaling, MAF: Minor Allele Frequency, SNP: Single Nucleotide Polymorphism, HWE: Hardy-Weinberg Equilibrium.
Study	Genotyping Platform	Genotyping Centre	Calling Method	Sample call rate	SNP call rate	MAF	HWE p-value	Population stratification	Imputation software	Reference Panel	Analysis software	Additional covariates	PCA Pct Variance Explained
3CDIJON	Illumina Human610 Quad BeadChip	Centre National de Génotypage, Evry, France	Illumina GeneCall	< 98%	< 98%	< 0.01	< 1x10-6	EIGENSOFT	MiniMac RELEASE STAMP 2012-11-16	1000G ALL phase-I, Version3	MINIMAC	NA	47.4
Age and Cognitive Performance Research Cohort	Illumina 610-Quadv1	Edinburgh Clinical Research Facility, University of Edinburgh	Illumina GenomeStudio	< 98%	< 98%	< 0.01	< 10e-6	Plink2 MDS	ShapeIT; IMPUTE2	1000G Release version III (March 2012)	SPSS SNPTEST	NA	41.1078
AgeCoDe-Basel	Affymetrix 6.0	Division of Molecular and Cognitive Neuroscience, Faculty of Psychology and Faculty of Medicine, University of Basel	Affymetrix Power Tools package (version: apt-1-14.4.1)	< 98%	< 95 %	< 0.01	< 10-6	MDS	Minimac	1000G Release version III (June 2014)	SPSS, SNPTEST	NA	52.7
AgeCoDe-DietBB	Illumina Infinium OmniExpressExome-8v1-3_A	Life and Brain Centre, Department of Genomics, University of Bonn	Illumina GenomeStudio	< 98%	< 95 %	< 0.01	< 10-6	MDS	Minimac	1000G Release version III (June 2014)	SPSS, SNPTEST	NA	52.7
AGES	Illumina HumanCNV370 Duo BeadChip	NIA, NIH, USA	Illumina Bead Studio	< 97%	< 98%	< 0.01	< 10-6	EIGENSTRAT		1000G		NA	50.1
Airwave	Illumina HumanCoreExome- 12v1-1	The Wellcome Trust Centre for Human Genetics	GenomeStudio software from Illumina	NA	NA	NA	< 10-4	MDS & genomic control	Minimac	1000 Genomes Project reference panel (version Phase 1 integrated release v3)	R PLINK	NA	33.2
Alzheimer's Disease Neuroimaging Initiative	Illumina Human610-Quad BeadChip; HumanOmniExpress BeadChip	NA	NA	< 98%	< 98%	< 0.01	< 10e-6	Plink2 MDS	ShapeIT; IMPUTE2	1000G Release version III (March 2012)	SPSS SNPTEST	NA	35.595
ARIC	Affymetrix GeneChip SNP Array 6.0	Broad Institute of MIT and Harvard, Cambridge, MA	Birdseed	<95%	<95%	<0.01	< 10-5	EIGENSTRAT	IMPUTE2	1000G Phase I integrated variant set release (v3) (April 2012)	ProbABEL v0.4.5	NA	56.1
ASPS	Illumina Human610-Quad BeadChip	Human Genotyping Facility, Genetic Laboratory Department of Internal Medicine, Erasmus MC, Rotterdam, The Netherlands	Illumina	< 98%	< 98 %	< 0.01	1×10-6	PCA	IMPUTE2 v2.3.1	1000G ALL phase1 integrated variant set realease v3 (march 2012)	SPSS probABEL	NA	42.6
ASPS-Fam	Affymetrix Genome-Wide Human SNP Array 6.0	Medical University Graz	Birdseed v2	< 98%	< 98%	< 0.05	< 5*10-6	PCA	IMPUTE2 v2.3.1	1000G ALL phase1 integrated variant set realease v3 (march 2012)	SPSS GWAF	NA	53.2
Athens Study of Psychosis Proneness and Incidence of Schizophrenia	NA	NA	NA	< 98%	< 98%	< 0.01	< 10e-6	Plink2 MDS	ShapeIT; IMPUTE2	1000G Release version III (March 2012)	SPSS SNPTEST	NA	NA
BASE-II	Affymetrix 6.0	ATLAS Biolabs, Inc.	Birdseed (v2)	<95%	< 98%	< 0.01	< 10-6	EIGENSOFT	IMPUTE2	1000 Genomes ALL phase 1 June 2011	NA	NA	41.2
BATS	(1) Illumina 610-Quadv1_B, N=1786 (2) Illumina Core+Exome, N=467	(1) deCODE Genetics (2) University of Queensland Diamantina Institute and QIMR Berghofer Molecular Genetics Laboratory	Illumina GenomeStudio	< 97%	<95%	< 0.01	< 10-6	PCA	Minimac	1000G Phase 3 v5 (October 2014)	SPSS; RAREMETALWORKER	Illumina chip family (HapMap-based vs 1000G-based/Omni family)	50.8
Betula	Illumina Human OmniExpress + Omni 1S	Department of Genomics, Life and Brain Center, University of Bonn, Germany.	Illumina GenomeStudio	< 97%	< 95%	< 0.01	< 10-3	MDS	Minimac	1000G Release version III (March 2012)	MaCH2QTL	NA	53.9
Center for Addiction and Mental Health	NA	NA	NA	< 98%	< 98%	< 0.01	< 10e-6	Plink2 MDS	ShapeIT; IMPUTE2	1000G Release version III (March 2012)	SPSS SNPTEST	NA	34.9446
CHS	Illumina HumanCNV370 Duo BeadChip	Genotyping Laboratory at Cedars-Sinai, USA	Illumina Bead Studio	< 95%	< 97%	< 0.01	< 10-5	PCA	NA	NA	NA	NA	59.9633
CROATIA_Korcula	Illumina HumanHap370-Duo and HumanHap370-Quad BeadChip or HumanOmniExpressExome-8 v1.0	Helmholtz Centre, Munich, Germany & Edinburgh Clinical Research Facility, University of Edinburgh	Illumina GenomeStudio	< 97%	< 98%	< 0.01	< 10-6	PCA	ShapeIt & Positional Burrows-Wheeler Transform	HRC panel	GenABEL, Regscan	NA	48
Duke Cognition Cohort	Illumina HumanHap 300; Human610, HumanHap550, Human1M, HumanCore	NA	NA	< 98%	< 98%	< 0.01	< 10e-6	Plink2 MDS	ShapeIT; IMPUTE2	1000G Release version III (March 2012)	SPSS SNPTEST	NA	40.7866
Duke Neurogenetics Study	Illumina HumanOmniExpress; HumanOmniExpress-24	NA	NA	< 98%	< 98%	< 0.01	< 10e-6	Plink2 MDS	ShapeIT; IMPUTE2	1000G Release version III (March 2012)	SPSS SNPTEST	NA	24.1537
ELSA	Illumina HumanOmni 2.5M	UCL Genomics	Illumina GenomeStudio	< 95%	< 95%	< 0.01	< 10-6	MDS	EAGLE2 (v2.0.5) and PBWT	1000G Phase 3	SNPTEST v2.5.2	NA	55.97
EPOZ	Global screening array (GSA) illumina	Erasmus MC	Illumina GenomeStudio	<97.5%	<97.5%	>20% difference between reference and population allele frequency was used	<10-4	MDS	Minimac	1000G Release version III (March 2017)	R	NA	54
Erasmus Rucphen Family study(ERF)	Illumina HumanHap 300K array, Illumina Human 370K-Duo SNP array	Leiden University Medical Center, Leiden; Erasmus MC, Rotterdam, NL	Illumina GeneCall	<96%,	< 98%	<0.005	< 10-8	None	phasing in MaCH (Mach 1.0.18.c), imputation in MiniMac RELEASE STAMP (2012.8.15)	1000G Release version III (March 2012)	ProbABEL v. 0.4.1	Adjusted for family structure	58.3
FHS	Affymetrix 500K mapping array plus Affymetrix 50K supplemental array	Affymetrix (Santa Clara, CA)	BRLMM		< 96.9%	0.01			Minimac release 2012-05-29 Minimac release2012-08-15	1000G Phase I Version 3 (3.14.2012)	GAWF	NA	52.6
FinnTwin	Human670-QuadCustom Illumina BeadChip, and the Illumina Human Core Exome BeadChip	Welcome Trust Sanger Institute, Edinburgh, UK, and the Broad Institute of MIT and Harvard, USA	Illuminus for 670k chip genotypes and Illumina GenomeStudio + zCall for Core Exome chip genotypes	< 95%	< 95%	< 0.01	< 10-6	MDS	IMPUTE	1000G Release version III (September 2013)	GEMMA	Relatedness matrix for adjusting sample relatedness and stratification	46.7
Galway and Dublin, Ireland	Affymetrix 6.0	NA	NA	< 98%	< 98%	< 0.01	< 10e-6	Plink2 MDS	ShapeIT; IMPUTE2	1000G Release version III (March 2012)	SPSS SNPTEST	NA	48.5704
GENDER + SATSA	Illumina Psychchip	The SNP&SEQ Technology Platform, Science for Life Laboratory, Uppsala, Sweden	Illumina GenomeStudio	< 99%	< 98%	<= 0.0	< 10^-6	PCA	SHAPEIT v2.r837 + Impute 2.3.2	1000G phase 1 version 3 (SHAPEIT2 phased version June 2014, monomorphic and singleton markers removed)	PLINK 1.07	Cluster-robust standard errors (as implemented in PLINK 1.07) were used to account for relatedness within twin pairs.	60.8
Generation Scotland	Illumina HumanOmniExpressExome-8 v1.0	Edinburgh Clinical Research Facility, University of Edinburgh	Illumina GenomeStudio	<97%	<98%	<0.01	<10-6	PCA	ShapeIt & Positional Burrows-Wheeler Transform	HRC panel	GenABEL, Regscan	NA	42
GENOA	Affymetrix 6.0 (92%); Illumina 1M-Duo, 660-Quad, or 610-Quad (8%)	Medical Genome Facility, Center for Individualized Medicine, Mayo Clinic, Rochester, MN (USA)	Affymetrix Birdseed; Illumina GenomeStudio	<95%	<95%	none	none	PCA	IMPUTE v2	1000G Release version III (March 2012)	R	NA	52.4
Genotype-Phenotype Associations in Alzheimer's Disease	Affymetrix GeneChip Human Mapping 500K Array Set	NA	NA	< 98%	< 98%	< 0.01	< 10e-6	Plink2 MDS	ShapeIT; IMPUTE2	1000G Release version III (March 2012)	SPSS SNPTEST	NA	45.118
HARMONY	Illumina Psychchip	The SNP&SEQ Technology Platform, Science for Life Laboratory, Uppsala, Sweden	Illumina GenomeStudio	< 99%	< 98%	<= 0.0	< 10^-6	PCA	SHAPEIT v2.r837 + Impute 2.3.2	1000G phase 1 version 3 (SHAPEIT2 phased version June 2014, monomorphic and singleton markers removed)	PLINK 1.07	Cluster-robust standard errors (as implemented in PLINK 1.07) were used to account for relatedness within twin pairs.	55.6
HCS	Affymetrix Kaiser Axiom	Hunter Medical Research Institute, NSW, Australia	Affymetrix	< 97%	< 97%	<.01	< 10-3	PCA	Minimac	1000G Release version III (March 2012)	Stata, Mach2QTL	NA	53.1
Helsinki Birth Cohort Study	Illumina Infinium 610K Quad chip	NA	NA	< 98%	< 98%	< 0.01	< 10e-6	Plink2 MDS	ShapeIT; IMPUTE2	1000G Release version III (March 2012)	SPSS SNPTEST	NA	NA
HRS	Illumina Omni2.5 BeadChip	CIDR	Illumina GenomeStudio	< 98%	< 98%	NA	< 10-4	PCA	IMPUTE2	1000G Release version III (March 2012)	SNPTEST	NA	37.8
Institute for Behavioral Genetics	Affymetrix 6.0	NA	NA	< 98%	< 98%	< 0.01	< 10e-6	Plink2 MDS	ShapeIT; IMPUTE2	1000G Release version III (March 2012)	SPSS SNPTEST	NA	64.977
Late Onset Alzheimer's Disease Family Study	Illumina Infinium II Human 610Quadv1_B Beadchips	NA	NA	< 98%	< 98%	< 0.01	< 10e-6	Plink2 MDS	ShapeIT; IMPUTE2	1000G Release version III (March 2012)	SPSS BOLT-LMM	NA	40.847
LBC1921	Ilumina 610-Quadv1	Edinburgh Clinical Research Facility, University of Edinburgh	Illumina GenomeStudio	< 95%	< 98%	< 0.01	< 10-3	MDS	Minimac	1000G Release version III (March 2012)	SPSS, MaCH2QTL	NA	55.9
LBC1936	Ilumina 610-Quadv1	Edinburgh Clinical Research Facility, University of Edinburgh	Illumina GenomeStudio	< 95%	< 98%	< 0.01	< 10-3	MDS	Minimac	1000G Release version III (March 2012)	SPSS, MaCH2QTL	NA	45.4
Learning on Genetics of Schizophrenia Spectrum	Illumina HumanOmniExpress	NA	NA	< 98%	< 98%	< 0.01	< 10e-6	Plink2 MDS	ShapeIT; IMPUTE2	1000G Release version III (March 2012)	SPSS SNPTEST	NA	32.7682
LIFE-Adult	Affymetrix-Axiom Genome-wide CEU 1	LIFE Research Center of Civilization Diseases	Affymetrix Powertools (v1.17.0)	<97%	<97%	NA	<=10E-6	PCA	IMPUTE2 (v 2.3.2) + SHAPEIT (v2.r790)	1000Genomes reference phase 1, release V3 of CEU (March 2012)	SPSS + SNPTEST (v2.5)	NA	57.9
Long Life Family Study	Illumina 2.5M HumanOmni	NA	NA	< 98%	< 98%	< 0.01	< 10e-6	Plink2 MDS	ShapeIT; IMPUTE2	1000G Release version III (March 2012)	SPSS BOLT-LMM	NA	44.875
Minnesota Center for Twin and Family Research	?	NA	NA	< 98%	< 98%	< 0.01	< 10e-6	Plink2 MDS	ShapeIT; IMPUTE2	1000G Release version III (March 2012)	SPSS BOLT-LMM	NA	NA
Munich, Germany	Illumina OmniExpress; Illumina HumanHap300 array; HumanHap550-Quad array	NA	NA	< 98%	< 98%	< 0.01	< 10e-6	Plink2 MDS	Eagle; PBWT	1000G Release version III (March 2012)	SPSS SNPTEST	NA	44.3808
NIMH Genes, Cognition and Psychosis Program	Illumina HumanHap550K; HumanHap610-Quad, HumanOmni2	NA	NA	< 98%	< 98%	< 0.01	< 10e-6	Plink2 MDS	ShapeIT; IMPUTE2	1000G Release version III (March 2012)	SPSS BOLT-LMM	NA	27.3488
Norwegian Cognitive NeuroGenetics Study	Illumina Human610-Quad Beadchip	NA	NA	< 98%	< 98%	< 0.01	< 10e-6	Plink2 MDS	Eagle; PBWT	1000G Release version III (March 2012)	SPSS SNPTEST	NA	NA
OATS	Illumina OmniExpress	Diamantina Institute, University of Queensland	Illumina GenomeStudio	<95%	< 95%	<0.01	< 10-6	EIGENSTRAT	MaCH/minimac	1000G reference panel (v3.20101123)	merlin	NA	38.21
ORCADES	Illumina Hap300 Illumina Omni1 Illumina OmniX	Munich GSF; Integragen Paris Gen-Probe, Livingston Munich GSF	Beadstudio using Hap300v2 cluster file Genome Studio, using Illumina cluster files Genome Studio, using Illumina cluster files	< 97%	< 98%	< 0.01 monomorphic monomorphic	<10-6	MDS	IMPUTE2	1000G Phase I Integrated Release Version 3 Haplotypes (2010-11 data freeze, 2012-03-14 haplotypes).	R, GenABEL, ProbABEL	NA	60.1
Philadelphia Neurodevelopmental Cohort	NA	NA	NA	< 98%	< 98%	< 0.01	< 10e-6	Plink2 MDS	ShapeIT; IMPUTE2	1000G Release version III (March 2012)	SPSS BOLT-LMM	NA	38.9588
PROSPER (all countries)	Illumina 660Quad beadchip	Erasmus MC, Rotterdam, the Netherlands	Illumina BeadStudio	< 95%	<97.5%	NA	NA	MDS	IMPUTE	1000G Release version III (March 2012)	SNPTEST	NA	Scotland 58.5 Ireland 57.9 Netherlands 59.3
ROSMAP 1	Affymetrix 6.0	Broad Institute’s Center for Genotyping and the Translational Genomics Research Institute	Birdsuite, Broad Institute	<95%	<95%	<0.01	<10-6	PCA	Beagle (3.3.2)	1000 Genomes Project Consortium interim phase I haplotypes, 2010–2011 data freeze	SAS Plink	NA	43.4
ROSMAP 2	Illumina HumanOmniExpress	Children's hospital of philadelphia	Illumina GenomeStudio	<95%	<95%	<0.01	<10-6	PCA	Beagle (3.3.2)	1000 Genomes Project Consortium interim phase I haplotypes, 2010–2011 data freeze	SAS Plink	NA	43.4
RSI	Illumina HumanHap 550-Duo BeadChip	Erasmus MC, Rotterdam, NL	Birdsuite, Broad Institute	< 97.5%	< 98%	<0.001	< 10-6	IBD matrix	Mach 1.0 and minimac v. 2012.8.6	1000G Release version III (March 2012)	ProbABEL v. 0.4.1	NA	48.1
RSII	Illumina HumanHap 550-Duo BeadChip and Illumina Human 610 Quad BeadChip	Erasmus MC, Rotterdam, NL	Illumina Bead Studio	< 97.5%	< 98%	<0.001	< 10-6	IBD matrix	Mach 1.0 and minimac v. 2012.8.6	1000G Release version III (March 2012)	ProbABEL v. 0.4.1	NA	48
RSIII	Illumina Human 610 Quad BeadChip	Erasmus MC, Rotterdam, NL	Illumina Genome Studio	< 97.5%	< 98%	<0.001	< 10-6	IBD matrix	Mach 1.0 and minimac v. 2012.8.6	1000G Release version III (March 2012)	ProbABEL v. 0.4.1	NA	45.8
Sydney MAS	Affymetrix 6.0	Ramaciotti Centre, UNSW	CRLMM (v1.10.0) in R	< 95%	< 95%	< 0.01	< 10-6	EIGENSTRAT	MaCH/minimac	1000G reference panel (v3.20101123)	mach2tql	NA	39.36
Thematic Organized Psychosis Research Study	Affymetrix 6.0; Illumina OmniExpress	NA	NA	< 98%	< 98%	< 0.01	< 10e-6	Plink2 MDS	ShapeIT; IMPUTE2	1000G Release version III (March 2012)	SPSS SNPTEST	NA	33.6386
UCLA Consortium for Neuropsychiatric Phenomics	Illumina OmniExpress-12v1_A chip	NA	NA	< 98%	< 98%	< 0.01	< 10e-6	Plink2 MDS	ShapeIT; IMPUTE2	1000G Release version III (March 2012)	SPSS SNPTEST	NA	46.8648
Understanding Society	Illumina HumanCoreExome 12v1-0 chip	Wellcome Trust Sanger Institute	Illumina GenCall	< 98%	< 98%	< 0.01	< 10-4	PCA	EAGLE2 (v2.0.5) and PBWT	1000G Phase 3	SNPTEST v2.5.2	NA	44
VETSA	HumanOmniExpress-24 v1.0A	deCODE Genetics	Illumina GenomeStudio	<95% (prior to imputation)	<95% (prior to imputation)	No MAF filter Prior to Imputation	<10-6 (prior to imputation)	PCs computed based on a linkage-disequilibrium (LD)-pruned set of 100,000 common (minor allele frequency [MAF]>0.05) SNPs.	MiniMac	1000G Phase 3 (version 5)	RAREMETALWORKER	NA	36.2
YFS	Illumina 670k Beadchip	Sanger Institute	Illumina GenomeStudio	< 90 %	< 95 %	< 0.01	< 1e-6	PCA	Impute2	1000G Release version III (March 2012)	SAS 9.3, SNPTEST	NA	41.3
Zucker Hillside Hospital	Illumina Omni-1Quad	NA	NA	< 98%	< 98%	< 0.01	< 10e-6	Plink2 MDS	ShapeIT; IMPUTE2	1000G Release version III (March 2012)	SPSS BOLT-LMM	NA	36.6935
UKBiobank	UK Biobank axiom and UK BiLEVE	The Affymetrix Research Services Laboratory, Santa Clara, Ca, USA		Details of UK Biobank QC can be found in Bycroft et al. (http://www.biorxiv.org/content/early/2017/07/20/166298)				PCA	SHAPEIT3 and IMPUTE4	HRC	BGENIE v1.1	genotyping batch, genotyping array, assessment centre	NA
