# Supplementary material for: Study of 300,486 individuals identifies 148 independent genetic loci influencing general cognitive function
Source: Nat Commun. 2018 May 29;9:2098. doi: 10.1038/s41467-018-04362-x (PMC5974083; doi:10.1038/s41467-018-04362-x)
Supplement: Supplementary file 23 — Supplementary Data 20 [file 41467_2018_4362_MOESM23_ESM.xlsx]

## Sheet: Sheet1
Supplementary Data 20. Sources of GWA results from consortia investigating psychiatric disease and health.
Phenotype	Consortium	URL	Reference	No. of individuals in GWAS
ADHD	Psychiatric Genetics Consortium (PGC)	https://www.med.unc.edu/pgc/downloads	Demontis, D et al. (2017). Discovery Of The First Genome-Wide Significant Risk Loci For ADHD. bioRxiv.	19,099 cases 34,194 controls
Alzheimer's disease	International Genomics of Alzheimer’s Project (IGAP)	http://www.pasteur-lille.fr/en/recherche/u744/igap/igap_download.php	Lambert et al. Nat Genet 2013; 45: 1452-1458. PMID: 24162737	17,008 cases
				37,154 controls
Anorexia nervosa	Genetic Consortium for Anorexia Nervosa (GCAN)	http://www.med.unc.edu/pgc/downloads	Boraska, Vesna, et al. Molecular psychiatry 2014; 19(10): 1085-1094. PIMD: 24514567	2,907 cases 14,860 controls
Bipolar disorder	Psychiatric Genetics Consortium (PGC)	https://www.med.unc.edu/pgc/downloads	Psychiatric GWAS Consortium Bipolar Disorder Working Group. Nat Genet 2011; 43: 977-983. PMID: 21926972	7,481 cases
				9,250 controls
Major depression	UK Biobank	NA	Howard et al. (2017) BioRxiv	8,276 cases
				209,308 controls
Schizophrenia	Psychiatric Genetics Consortium (PGC)	https://www.med.unc.edu/pgc/downloads	Schizophrenia Working Group of the Psychiatric Genomics Consortium. Nature 2014; 511: 421-427. PMID: 25056061	36,989 cases
				113,075 controls
Neuroticism	UK Biobank	http://www.ccace.ed.ac.uk/node/335	Luciano et al Nat Genet 2018; 50: 6-11. PMID: 29255261	329821
Coronary Artery Disease	CARDIoGRAM	http://www.cardiogramplusc4d.org/downloads/	Schunkert et al. Nat Genet 2011; 43: 333-338. PMID: 21378990	22 233 cases
				64 762 controls
Type 2 diabetes	DIAGRAM	http://diagram-consortium.org/downloads.html	Morris et al. Nat Genet 2012; 44: 981-990. PMID: 22885922	12 171 cases
				56 862 controls
Alzheimer's disease	International Genomics of Alzheimer’s Project (IGAP)	http://www.pasteur-lille.fr/en/recherche/u744/igap/igap_download.php	Lambert et al. Nat Genet 2013; 45: 1452-1458. PMID: 24162737	17 008 cases
				37 154 controls
Hippocampal volume	ENIGMA	http://enigma.ini.usc.edu/ongoing/gwasma-of-subcorticalstructures/	Hibar et al. Nature 2015; 520: 224-229. PMID: 25607358	13 171
Intracranial volume	ENIGMA	http://enigma.ini.usc.edu/ongoing/gwasma-of-subcorticalstructures/	Hibar et al. Nature 2015; 520: 224-229. PMID: 25607358	13 171
BMI	GIANT	http://www.broadinstitute.org/collaboration/ giant/index.php/GIANT_	Locke et al. Nature 2015; 518: 197-206. PMID: 25673413	339 224
		consortium_data_files
Longevity	CHARGE-Aging and Longevity		Broer et al. J Gerontol A Biol Sci Med Sci 2015; 70: 110-118. PMID: 25199915	6036 cases
				3757 controls
HDL Cholesterol	Global Lipids Consortium	http://csg.sph.umich.edu//abecasis/public/lipids2013/	Willer et al. Nature Genet 2013; 45: 1274-1283	188 577
LDL Cholesterol	Global Lipids Consortium	http://csg.sph.umich.edu//abecasis/public/lipids2013/	Willer et al. Nature Genet 2013; 45: 1274-1283	188 577
Triglycerides	Global Lipids Consortium	http://csg.sph.umich.edu//abecasis/public/lipids2013/	Willer et al. Nature Genet 2013; 45: 1274-1283	188 577
Smoking status	TAG	https://www.med.unc.edu/pgc/files/resultfiles/tag.evrsmk.tbl.gz	Furberg et al Nature Genetics 2010; 42: 441-447	74 053
Lung cancer	International Lung Cancer Consortium	http://ilcco.iarc.fr/	Wang et al. Nature Genetics 2014; 46: 736-741	11,348 cases 15,861 controls
Age at Menarche	Reprogen Consortium	http://www.reprogen.org/data_download.html	Day et al. Nature Genetics 2017; 49: 834-841	329345
Age at Menopause	Reprogen Consortium	http://www.reprogen.org/data_download.html	Day et al. Nature Genetics 2015; 47: 1294-1303	69360
HbA1c	MAGIC consortium	https://www.magicinvestigators.org/downloads/	Soranzo et al. Diabetes 2010; 59: 3229-3239	46368
Bone density femoral neck	GEFOS consortium	http://www.gefos.org/?q=content/data-release-2012	Zheng et al. Nature 2015; 526:112-117	32735
Bone density lumbar spine	GEFOS consortium	http://www.gefos.org/?q=content/data-release-2012	Zheng et al. Nature 2015; 526:112-117	28498
Angina	UK Biobank	https://sites.google.com/broadinstitute.org/ukbbgwasresults/home?authuser=0	NA	337159
Heart attack	UK Biobank	https://sites.google.com/broadinstitute.org/ukbbgwasresults/home?authuser=0	NA	337159
Hypertension	UK Biobank	https://sites.google.com/broadinstitute.org/ukbbgwasresults/home?authuser=0	NA	337159
Pulse wave Arterial Stiffness	UK Biobank	https://sites.google.com/broadinstitute.org/ukbbgwasresults/home?authuser=0	NA	109813
Autism spectrum disorder	Psychiatric Genetics Consortium (PGC)	https://www.med.unc.edu/pgc/downloads	NA	10263
Subjective wellbeing	SSGAC	http://www.thessgac.org/#!data/kuzq8	Okbay et al. Nat Genet 2016; 48(6): 624-33	298420
Birth weight	UK Biobank	https://sites.google.com/broadinstitute.org/ukbbgwasresults/home?authuser=0	NA	193063
Bone density heel	UK Biobank	https://sites.google.com/broadinstitute.org/ukbbgwasresults/home?authuser=0	NA	194398
Depressive symptoms	SSGAC	http://www.thessgac.org/#!data/kuzq8	Okbay et al. Nat Genet 2016; 48(6): 624-33	161460
Fathers age at death	UK Biobank	https://sites.google.com/broadinstitute.org/ukbbgwasresults/home?authuser=0	NA	248726
FEV1	UK Biobank	https://sites.google.com/broadinstitute.org/ukbbgwasresults/home?authuser=0	NA	307638
Hand grip strength	UK Biobank	https://sites.google.com/broadinstitute.org/ukbbgwasresults/home?authuser=0	NA	335842
Happiness	UK Biobank	https://sites.google.com/broadinstitute.org/ukbbgwasresults/home?authuser=0	NA	110935
Health satisfaction	UK Biobank	https://sites.google.com/broadinstitute.org/ukbbgwasresults/home?authuser=0	NA	110964
Mothers age at death	UK Biobank	https://sites.google.com/broadinstitute.org/ukbbgwasresults/home?authuser=0	NA	199690
Osteoarthritis	UK Biobank	https://sites.google.com/broadinstitute.org/ukbbgwasresults/home?authuser=0	NA	337159
Overall health rating	UK Biobank	https://sites.google.com/broadinstitute.org/ukbbgwasresults/home?authuser=0	NA	336020
Parents age at death	UK Biobank	http://www.t2diabetesgenes.org/data/	Pilling et al. Aging 2016; 8(3): 547-60	75244
Sleep duration	UK Biobank	https://sites.google.com/broadinstitute.org/ukbbgwasresults/home?authuser=0	NA	335410
Sleeplessness/insomnia	UK Biobank	https://sites.google.com/broadinstitute.org/ukbbgwasresults/home?authuser=0	NA	336965
Wears glasses or contact lenses	UK Biobank	https://sites.google.com/broadinstitute.org/ukbbgwasresults/home?authuser=0	NA	336919
Reason for glasses/contact lenses: Longsightedness	UK Biobank	https://sites.google.com/broadinstitute.org/ukbbgwasresults/home?authuser=0	NA	335700
Reason for glasses/contact lenses: Shortsightedness	UK Biobank	https://sites.google.com/broadinstitute.org/ukbbgwasresults/home?authuser=0	NA	335700
